# Supplementary material
Source: PubMed Central journal article supplement (PMC8978872)
Supplement: NIHMS1786777-supplement-Supplemental_1.pdf [file NIHMS1786777-supplement-Supplemental_1.pdf]

**Supplementary Table E3.** Full set of SKAT-O gene-based tests.

| SetID    | Chr | ADEH- vs NA        |          |                    |          | ADEH+ vs ADEH-     |          |                    |          | ADEH+ vs NA        |          |                    |          |
|----------|-----|--------------------|----------|--------------------|----------|--------------------|----------|--------------------|----------|--------------------|----------|--------------------|----------|
|          |     | rare novel         |          | all                |          | rare novel         |          | all                |          | rare novel         |          | all                |          |
|          |     | N variants in test | p-value  | N variants in test | p-value  | N variants in test | p-value  | N variants in test | p-value  | N variants in test | p-value  | N variants in test | p-value  |
| RBBP8NL* | 20  | 4                  | 3.00E-01 | 5                  | 3.00E-01 | 3                  | 1.38E-03 | 4                  | 1.38E-03 | 2                  | 1.48E-04 | 3                  | 1.48E-04 |
| TRIM15*  | 6   | 3                  | 4.35E-02 | 3                  | 4.35E-02 | 2                  | 3.03E-04 | 2                  | 3.03E-04 | 3                  | 1.08E-01 | 3                  | 1.08E-01 |
| CLEC7A*  | 12  | 2                  | 1.38E-01 | 3                  | 3.05E-02 | 2                  | 5.37E-01 | 3                  | 1.58E-01 | 1                  | 3.20E-02 | 2                  | 3.40E-04 |
| SIDT2*   | 11  | 5                  | 7.04E-01 | 5                  | 7.04E-01 | 4                  | 5.84E-04 | 4                  | 5.84E-04 | 3                  | 3.49E-04 | 3                  | 3.49E-04 |
| FRMD3*   | 9   | 2                  | 2.40E-01 | 2                  | 2.40E-01 | 2                  | 3.39E-03 | 2                  | 3.39E-03 | 1                  | 4.75E-04 | 1                  | 4.75E-04 |
| TPSG1*   | 16  | 2                  | 4.36E-03 | 3                  | 1.22E-02 | 2                  | 1.01E-01 | 3                  | 1.29E-01 | 2                  | 6.58E-04 | 3                  | 2.48E-03 |
| GSTZ1*   | 14  | 1                  | 7.41E-01 | 3                  | 1.79E-01 | 1                  | 4.53E-01 | 3                  | 6.84E-02 |                    |          | 2                  | 7.37E-04 |
| SP110*   | 2   | 2                  | 7.02E-01 | 2                  | 7.02E-01 | 3                  | 8.50E-04 | 3                  | 8.50E-04 | 4                  | 4.33E-03 | 4                  | 4.33E-03 |
| LARS     | 5   | 2                  | 1.30E-01 | 2                  | 1.30E-01 | 3                  | 1.76E-02 | 3                  | 1.76E-02 | 2                  | 9.98E-04 | 2                  | 9.98E-04 |
| OR1E1    | 17  | 1                  | 6.93E-02 | 1                  | 6.93E-02 | 1                  | 1.03E-03 | 1                  | 1.03E-03 | 1                  | 2.40E-02 | 1                  | 2.40E-02 |
| OR51G1   | 11  | 2                  | 5.54E-01 | 4                  | 6.29E-01 | 2                  | 1.50E-03 | 4                  | 6.77E-03 | 2                  | 1.22E-03 | 4                  | 4.95E-03 |
| TMEM190  | 19  | 3                  | 1.62E-01 | 3                  | 1.62E-01 | 3                  | 3.68E-02 | 3                  | 3.68E-02 | 2                  | 1.22E-03 | 2                  | 1.22E-03 |
| ZBED8    | 5   | 2                  | 1.46E-01 | 2                  | 1.46E-01 | 3                  | 1.93E-02 | 3                  | 1.93E-02 | 2                  | 1.34E-03 | 2                  | 1.34E-03 |
| GNRHR    | 4   | 2                  | 1.57E-02 | 2                  | 1.57E-02 | 1                  | 1.39E-03 | 1                  | 1.39E-03 | 2                  | 4.15E-02 | 2                  | 4.15E-02 |
| IGDCC4   | 15  | 4                  | 1.20E-01 | 5                  | 1.25E-01 | 4                  | 1.47E-03 | 5                  | 1.47E-03 | 2                  | 3.17E-02 | 3                  | 3.17E-02 |
| GTSF1L   | 20  | 1                  | 5.62E-03 | 1                  | 5.62E-03 | 1                  | 1.41E-01 | 1                  | 1.41E-01 | 1                  | 1.48E-03 | 1                  | 1.48E-03 |
| C7orf57  | 7   | 1                  | 8.03E-02 | 2                  | 8.02E-02 | 1                  | 1.52E-03 | 2                  | 1.52E-03 | 1                  | 2.80E-02 | 2                  | 2.79E-02 |
| DTL      | 1   |                    |          |                    |          | 2                  | 1.79E-03 | 2                  | 1.79E-03 | 2                  | 4.53E-03 | 2                  | 4.53E-03 |
| ATXN1    | 6   |                    |          |                    |          | 1                  | 1.84E-03 | 1                  | 1.84E-03 | 1                  | 5.11E-03 | 1                  | 5.11E-03 |
| SLC26A7  | 8   | 3                  | 6.96E-03 | 3                  | 6.96E-03 | 2                  | 1.88E-03 | 2                  | 1.88E-03 | 5                  | 1.00E-01 | 5                  | 1.00E-01 |
| TCN1     | 11  | 2                  | 4.52E-01 | 2                  | 4.52E-01 | 2                  | 2.04E-03 | 2                  | 2.04E-03 | 1                  | 2.59E-02 | 1                  | 2.59E-02 |
| FOXM1    | 12  | 4                  | 2.99E-01 | 4                  | 2.99E-01 | 4                  | 3.56E-03 | 4                  | 3.56E-03 | 2                  | 2.05E-03 | 2                  | 2.05E-03 |
| SERPINB7 | 18  |                    |          |                    |          | 2                  | 2.07E-03 | 2                  | 2.07E-03 | 2                  | 4.69E-03 | 2                  | 4.69E-03 |
| GDPD3    | 16  |                    |          |                    |          | 2                  | 2.09E-03 | 2                  | 2.09E-03 | 2                  | 5.02E-03 | 2                  | 5.02E-03 |
| TGM5     | 15  | 4                  | 2.04E-02 | 4                  | 2.04E-02 | 4                  | 2.12E-03 | 4                  | 2.12E-03 | 4                  | 1.62E-01 | 4                  | 1.62E-01 |
| PKD2L1   | 10  | 6                  | 5.80E-01 | 6                  | 5.80E-01 | 4                  | 4.71E-03 | 4                  | 4.71E-03 | 3                  | 2.16E-03 | 3                  | 2.16E-03 |
| FAM81B   | 5   | 5                  | 4.77E-02 | 5                  | 4.77E-02 | 5                  | 2.17E-03 | 5                  | 2.17E-03 | 2                  | 7.06E-02 | 2                  | 7.06E-02 |
| LRCH3    | 3   | 3                  | 5.91E-03 | 3                  | 5.91E-03 | 2                  | 2.36E-03 | 2                  | 2.36E-03 | 5                  | 3.58E-01 | 5                  | 3.58E-01 |
| C6orf229 | 6   | 1                  | 1.82E-02 | 1                  | 1.82E-02 | 1                  | 1.30E-01 | 1                  | 1.30E-01 | 1                  | 2.43E-03 | 1                  | 2.43E-03 |
| MED7     | 5   |                    |          |                    |          | 2                  | 2.49E-03 | 2                  | 2.49E-03 | 2                  | 5.41E-03 | 2                  | 5.41E-03 |
| ACAP1    | 17  | 1                  | 8.83E-01 | 1                  | 8.83E-01 | 1                  | 2.74E-03 | 1                  | 2.74E-03 | 1                  | 5.58E-03 | 1                  | 5.58E-03 |
| ARHGAP32 | 11  |                    |          |                    |          | 2                  | 2.79E-03 | 2                  | 2.79E-03 | 2                  | 6.60E-03 | 2                  | 6.60E-03 |
| RPAP1    | 15  | 4                  | 3.38E-01 | 4                  | 3.38E-01 | 3                  | 2.83E-03 | 3                  | 2.83E-03 | 4                  | 2.86E-02 | 4                  | 2.86E-02 |
| GEMIN4   | 17  | 7                  | 2.72E-01 | 9                  | 2.72E-01 | 4                  | 2.84E-03 | 6                  | 2.84E-03 | 4                  | 2.02E-02 | 6                  | 2.02E-02 |
| TRAPPC12 | 2   | 5                  | 5.25E-03 | 6                  | 5.25E-03 | 3                  | 3.03E-03 | 4                  | 3.03E-03 | 3                  | 2.04E-01 | 4                  | 2.04E-01 |
| C1orf216 | 1   | 2                  | 4.13E-01 | 2                  | 4.13E-01 | 2                  | 3.06E-03 | 2                  | 3.06E-03 | 1                  | 2.94E-02 | 1                  | 2.94E-02 |
| PODXL2   | 3   |                    |          |                    |          | 2                  | 3.11E-03 | 2                  | 3.11E-03 | 2                  | 6.31E-03 | 2                  | 6.31E-03 |
| KRT35    | 17  | 2                  | 3.11E-01 | 3                  | 3.11E-01 | 3                  | 5.65E-02 | 3                  | 5.65E-02 | 2                  | 3.13E-03 | 3                  | 3.13E-03 |
| DSG4     | 18  | 3                  | 1.82E-01 | 3                  | 1.82E-01 | 3                  | 2.48E-02 | 3                  | 2.48E-02 | 1                  | 3.18E-03 | 1                  | 3.18E-03 |
| UMOD     | 16  | 2                  | 9.73E-02 | 2                  | 9.73E-02 | 2                  | 6.94E-02 | 2                  | 6.94E-02 | 1                  | 3.20E-03 | 1                  | 3.20E-03 |
| FNDC3A   | 13  | 1                  | 8.24E-02 | 2                  | 1.66E-01 |                    |          | 1                  | 3.40E-03 | 1                  | 6.59E-01 | 2                  | 2.55E-01 |
| PECR     | 2   | 2                  | 5.81E-01 | 2                  | 5.81E-01 | 2                  | 1.17E-02 | 2                  | 1.17E-02 | 1                  | 3.45E-03 | 1                  | 3.45E-03 |
| DHRS7    | 14  | 3                  | 6.31E-01 | 3                  | 6.31E-01 | 3                  | 3.54E-03 | 3                  | 3.54E-03 | 2                  | 9.14E-03 | 2                  | 9.14E-03 |
| PER1     | 17  | 6                  | 4.31E-01 | 6                  | 4.31E-01 | 4                  | 2.16E-02 | 4                  | 2.16E-02 | 3                  | 3.60E-03 | 3                  | 3.60E-03 |
| EPYC     | 12  | 4                  | 2.46E-01 | 4                  | 2.46E-01 | 5                  | 1.05E-02 | 5                  | 1.05E-02 | 3                  | 3.69E-03 | 3                  | 3.69E-03 |
| CLASRP   | 19  | 2                  | 1.39E-01 | 2                  | 1.39E-01 | 2                  | 4.75E-02 | 2                  | 4.75E-02 | 1                  | 3.74E-03 | 1                  | 3.74E-03 |
| MDM1     | 12  | 3                  | 8.17E-01 | 3                  | 8.17E-01 | 5                  | 3.79E-03 | 5                  | 3.79E-03 | 3                  | 6.78E-03 | 3                  | 6.78E-03 |

| SetID       | Chr | ADEH- vs NA        |          |                    |          | ADEH+ vs ADEH-     |          |                    |          | ADEH+ vs NA        |          |                    |          |
|-------------|-----|--------------------|----------|--------------------|----------|--------------------|----------|--------------------|----------|--------------------|----------|--------------------|----------|
|             |     | rarenovel          |          | all                |          | rarenovel          |          | all                |          | rarenovel          |          | all                |          |
|             |     | N variants in test | p-value  | N variants in test | p-value  | N variants in test | p-value  | N variants in test | p-value  | N variants in test | p-value  | N variants in test | p-value  |
| KRT84       | 12  | 5                  | 3.00E-02 | 5                  | 3.00E-02 | 5                  | 2.85E-01 | 5                  | 2.85E-01 | 3                  | 4.21E-03 | 3                  | 4.21E-03 |
| CUBN        | 10  | 14                 | 1.75E-01 | 14                 | 1.75E-01 | 10                 | 4.26E-03 | 10                 | 4.26E-03 | 10                 | 3.33E-01 | 10                 | 3.33E-01 |
| CEACAM6     | 19  | 4                  | 2.06E-01 | 4                  | 2.06E-01 | 4                  | 4.29E-03 | 4                  | 4.29E-03 | 2                  | 8.74E-02 | 2                  | 8.74E-02 |
| GRXCR2      | 5   | 1                  | 1.00E+00 | 1                  | 1.00E+00 | 1                  | 4.36E-03 | 1                  | 4.36E-03 | 1                  | 4.81E-03 | 1                  | 4.81E-03 |
| C1orf210    | 1   | 1                  | 7.53E-01 | 1                  | 7.53E-01 | 2                  | 8.49E-03 | 2                  | 8.49E-03 | 2                  | 4.37E-03 | 2                  | 4.37E-03 |
| TNFRSF11B   | 8   | 1                  | 6.78E-01 | 1                  | 6.78E-01 | 1                  | 4.39E-03 | 1                  | 4.39E-03 | 1                  | 1.67E-02 | 1                  | 1.67E-02 |
| SLC6A15     | 12  | 1                  | 2.34E-01 | 1                  | 2.34E-01 | 1                  | 2.61E-02 | 1                  | 2.61E-02 | 1                  | 4.41E-03 | 1                  | 4.41E-03 |
| C6orf222    | 6   | 5                  | 1.62E-02 | 6                  | 1.62E-02 | 6                  | 1.93E-01 | 7                  | 1.93E-01 | 2                  | 4.56E-03 | 3                  | 4.56E-03 |
| HNRNPUL2    | 11  | 1                  | 7.45E-01 | 1                  | 7.45E-01 | 3                  | 7.31E-03 | 3                  | 7.31E-03 | 2                  | 4.59E-03 | 2                  | 4.59E-03 |
| EP400       | 12  | 5                  | 6.90E-01 | 5                  | 6.90E-01 | 4                  | 4.66E-03 | 4                  | 4.66E-03 | 5                  | 1.46E-02 | 5                  | 1.46E-02 |
| RSL1D1      | 16  | 2                  | 9.63E-03 | 2                  | 9.63E-03 | 2                  | 4.26E-01 | 2                  | 4.26E-01 | 1                  | 4.66E-03 | 1                  | 4.66E-03 |
| MRPL38      | 17  | 2                  | 7.01E-01 | 2                  | 7.01E-01 | 2                  | 1.27E-02 | 2                  | 1.27E-02 | 2                  | 4.79E-03 | 2                  | 4.79E-03 |
| FDFT1       | 8   | 1                  | 7.50E-01 | 1                  | 7.50E-01 | 3                  | 7.19E-03 | 3                  | 7.19E-03 | 2                  | 4.84E-03 | 2                  | 4.84E-03 |
| PKP2        | 12  | 3                  | 6.72E-03 | 3                  | 6.72E-03 | 3                  | 2.67E-01 | 3                  | 2.67E-01 | 2                  | 4.96E-03 | 2                  | 4.96E-03 |
| TCEANC2     | 1   | 1                  | 4.14E-01 | 1                  | 4.14E-01 | 1                  | 1.57E-02 | 1                  | 1.57E-02 | 1                  | 4.98E-03 | 1                  | 4.98E-03 |
| ADGRE1      | 19  | 4                  | 2.38E-02 | 4                  | 2.38E-02 | 5                  | 2.32E-01 | 5                  | 2.32E-01 | 2                  | 4.99E-03 | 2                  | 4.99E-03 |
| NSG1        | 4   | 1                  | 1.11E-01 | 1                  | 1.11E-01 | 1                  | 5.93E-02 | 1                  | 5.93E-02 | 1                  | 5.05E-03 | 1                  | 5.05E-03 |
| LARS2       | 3   | 2                  | 1.45E-01 | 2                  | 1.45E-01 | 3                  | 8.91E-02 | 3                  | 8.91E-02 | 2                  | 5.11E-03 | 2                  | 5.11E-03 |
| DPH6        | 15  | 6                  | 6.79E-02 | 6                  | 6.79E-02 | 7                  | 2.24E-01 | 7                  | 2.24E-01 | 2                  | 5.12E-03 | 2                  | 5.12E-03 |
| QPCTL       | 19  | 4                  | 2.25E-01 | 4                  | 2.25E-01 | 3                  | 1.26E-02 | 3                  | 1.26E-02 | 3                  | 5.14E-03 | 3                  | 5.14E-03 |
| CYP7A1      | 8   | 4                  | 1.38E-01 | 4                  | 1.38E-01 | 3                  | 5.15E-03 | 3                  | 5.15E-03 | 3                  | 7.65E-02 | 3                  | 7.65E-02 |
| FANCG       | 9   | 1                  | 6.93E-01 | 1                  | 6.93E-01 | 3                  | 6.58E-03 | 3                  | 6.58E-03 | 2                  | 5.16E-03 | 2                  | 5.16E-03 |
| SRGAP1      | 12  | 1                  | 7.58E-01 | 1                  | 7.58E-01 | 2                  | 9.07E-03 | 2                  | 9.07E-03 | 2                  | 5.17E-03 | 2                  | 5.17E-03 |
| UROC1       | 3   | 4                  | 8.06E-01 | 4                  | 8.06E-01 | 4                  | 5.21E-03 | 4                  | 5.21E-03 | 2                  | 1.14E-02 | 2                  | 1.14E-02 |
| SH2D2A      | 1   | 2                  | 3.04E-01 | 2                  | 3.04E-01 | 2                  | 3.63E-02 | 2                  | 3.63E-02 | 1                  | 5.28E-03 | 1                  | 5.28E-03 |
| SDCCAG8     | 1   | 5                  | 7.46E-01 | 5                  | 7.46E-01 | 5                  | 5.37E-03 | 5                  | 5.37E-03 | 2                  | 8.53E-03 | 2                  | 8.53E-03 |
| NLRP9       | 19  | 2                  | 7.17E-04 | 2                  | 7.17E-04 | 1                  | 5.41E-03 | 1                  | 5.41E-03 | 2                  | 7.14E-01 | 2                  | 7.14E-01 |
| MEFV        | 16  | 1                  | 2.44E-01 | 1                  | 2.44E-01 | 2                  | 1.13E-02 | 2                  | 1.13E-02 | 2                  | 5.45E-03 | 2                  | 5.45E-03 |
| IFT88       | 13  | 3                  | 3.05E-01 | 3                  | 3.05E-01 | 5                  | 3.61E-02 | 5                  | 3.61E-02 | 2                  | 5.49E-03 | 2                  | 5.49E-03 |
| SURF6       | 9   | 3                  | 7.76E-02 | 4                  | 7.76E-02 | 1                  | 5.79E-03 | 2                  | 5.79E-03 | 3                  | 1.61E-01 | 4                  | 1.61E-01 |
| ZMIZ1       | 10  | 4                  | 1.63E-01 | 4                  | 1.63E-01 | 4                  | 1.88E-02 | 4                  | 1.88E-02 | 1                  | 5.80E-03 | 1                  | 5.80E-03 |
| PHC2        | 1   | 1                  | 7.56E-01 | 1                  | 7.56E-01 | 3                  | 1.01E-02 | 3                  | 1.01E-02 | 2                  | 5.86E-03 | 2                  | 5.86E-03 |
| PIGO        | 9   | 3                  | 1.76E-01 | 3                  | 1.76E-01 | 3                  | 1.05E-01 | 3                  | 1.05E-01 | 1                  | 5.98E-03 | 1                  | 5.98E-03 |
| NUP210      | 3   | 7                  | 5.59E-01 | 7                  | 5.59E-01 | 9                  | 2.00E-02 | 9                  | 2.00E-02 | 5                  | 6.07E-03 | 5                  | 6.07E-03 |
| PHLDB3      | 19  | 1                  | 7.16E-01 | 2                  | 1.00E+00 | 3                  | 7.34E-03 | 4                  | 6.80E-03 | 2                  | 6.23E-03 | 3                  | 1.24E-02 |
| HEPACAM2    | 7   | 2                  | 2.25E-01 | 2                  | 2.25E-01 | 2                  | 4.71E-02 | 2                  | 4.71E-02 | 1                  | 6.28E-03 | 1                  | 6.28E-03 |
| TSSK1B      | 5   | 1                  | 6.95E-02 | 1                  | 6.95E-02 | 1                  | 6.30E-03 | 1                  | 6.30E-03 | 1                  | 1.40E-01 | 1                  | 1.40E-01 |
| DYTN        | 2   | 3                  | 6.00E-02 | 4                  | 6.74E-02 | 5                  | 1.26E-01 | 6                  | 1.29E-01 | 2                  | 6.34E-03 | 3                  | 8.46E-03 |
| FBXO34      | 14  | 1                  | 2.69E-02 | 1                  | 2.69E-02 | 1                  | 2.53E-01 | 1                  | 2.53E-01 | 1                  | 6.40E-03 | 1                  | 6.40E-03 |
| PITPNM2     | 12  | 1                  | 7.58E-01 | 1                  | 7.58E-01 | 3                  | 1.05E-02 | 3                  | 1.05E-02 | 2                  | 6.58E-03 | 2                  | 6.58E-03 |
| CHURC1      | 14  | 2                  | 3.14E-01 | 2                  | 3.14E-01 | 2                  | 3.45E-02 | 2                  | 3.45E-02 | 1                  | 6.92E-03 | 1                  | 6.92E-03 |
| CHURC1-FNTB | 14  | 1                  | 4.08E-01 | 1                  | 4.08E-01 | 1                  | 1.84E-02 | 1                  | 1.84E-02 | 1                  | 6.92E-03 | 1                  | 6.92E-03 |
| PTPDC1      | 9   | 3                  | 2.31E-01 | 3                  | 2.31E-01 | 4                  | 1.90E-02 | 4                  | 1.90E-02 | 3                  | 6.99E-03 | 3                  | 6.99E-03 |
| PNPLA7      | 9   | 12                 | 8.35E-02 | 12                 | 8.35E-02 | 14                 | 1.38E-01 | 14                 | 1.38E-01 | 6                  | 7.01E-03 | 6                  | 7.01E-03 |
| EPX         | 17  | 10                 | 5.43E-01 | 10                 | 5.43E-01 | 9                  | 2.49E-02 | 9                  | 2.49E-02 | 7                  | 7.07E-03 | 7                  | 7.07E-03 |
| BRE         | 2   | 1                  | 7.49E-01 | 1                  | 7.49E-01 | 1                  | 7.16E-03 | 1                  | 7.16E-03 | 1                  | 3.25E-02 | 1                  | 3.25E-02 |
| ZNF142      | 2   | 8                  | 1.19E-01 | 8                  | 1.19E-01 | 8                  | 1.06E-01 | 8                  | 1.06E-01 | 5                  | 7.32E-03 | 5                  | 7.32E-03 |
| SFXN5       | 2   | 4                  | 2.44E-01 | 4                  | 2.44E-01 | 3                  | 9.60E-02 | 3                  | 9.60E-02 | 2                  | 7.32E-03 | 2                  | 7.32E-03 |

| SetID      | Chr | ADEH- vs NA        |          |                    |          | ADEH+ vs ADEH-     |          |                    |          | ADEH+ vs NA        |          |                    |          |
|------------|-----|--------------------|----------|--------------------|----------|--------------------|----------|--------------------|----------|--------------------|----------|--------------------|----------|
|            |     | rarenovel          |          | all                |          | rarenovel          |          | all                |          | rarenovel          |          | all                |          |
|            |     | N variants in test | p-value  | N variants in test | p-value  | N variants in test | p-value  | N variants in test | p-value  | N variants in test | p-value  | N variants in test | p-value  |
| EVA1B      | 1   | 2                  | 7.00E-01 | 2                  | 7.00E-01 | 3                  | 7.61E-03 | 3                  | 7.61E-03 | 2                  | 1.62E-02 | 2                  | 1.62E-02 |
| MANEA      | 6   | 2                  | 8.11E-02 | 3                  | 1.31E-01 | 2                  | 7.74E-03 | 3                  | 9.73E-03 | 1                  | 5.62E-02 | 2                  | 7.87E-02 |
| MPHOSPH8   | 13  | 3                  | 6.51E-02 | 3                  | 6.51E-02 | 3                  | 7.91E-03 | 3                  | 7.91E-03 | 1                  | 1.27E-01 | 1                  | 1.27E-01 |
| DBX2       | 12  | 2                  | 3.28E-01 | 2                  | 3.28E-01 | 3                  | 8.06E-03 | 3                  | 8.06E-03 | 2                  | 2.80E-02 | 2                  | 2.80E-02 |
| FCN2       | 9   | 2                  | 1.62E-01 | 2                  | 1.62E-01 | 1                  | 4.36E-02 | 1                  | 4.36E-02 | 2                  | 8.16E-03 | 2                  | 8.16E-03 |
| ADH7       | 4   | 2                  | 5.81E-01 | 3                  | 6.41E-01 | 2                  | 6.14E-01 | 3                  | 4.50E-01 |                    |          | 1                  | 8.17E-03 |
| ZNF646     | 16  | 5                  | 1.44E-01 | 5                  | 1.44E-01 | 5                  | 6.55E-02 | 5                  | 6.55E-02 | 3                  | 8.20E-03 | 3                  | 8.20E-03 |
| GMPS       | 3   | 1                  | 3.31E-01 | 1                  | 3.31E-01 | 1                  | 8.97E-03 | 1                  | 8.97E-03 | 1                  | 6.05E-02 | 1                  | 6.05E-02 |
| KCNQ3      | 8   | 1                  | 6.83E-01 | 1                  | 6.83E-01 | 2                  | 8.99E-03 | 2                  | 8.99E-03 | 2                  | 3.35E-02 | 2                  | 3.35E-02 |
| NOP14      | 4   | 5                  | 8.33E-01 | 5                  | 8.33E-01 | 4                  | 3.19E-02 | 4                  | 3.19E-02 | 2                  | 9.07E-03 | 2                  | 9.07E-03 |
| TMPRSS11E  | 4   | 2                  | 5.77E-01 | 3                  | 5.80E-01 | 2                  | 5.89E-01 | 3                  | 6.24E-01 |                    |          | 1                  | 9.15E-03 |
| MCOLN2     | 1   | 4                  | 3.45E-01 | 4                  | 3.45E-01 | 4                  | 1.09E-01 | 4                  | 1.09E-01 | 2                  | 9.22E-03 | 2                  | 9.22E-03 |
| FBXL6      | 8   | 4                  | 7.90E-01 | 5                  | 5.79E-01 | 4                  | 2.63E-02 | 5                  | 2.61E-02 | 2                  | 9.49E-03 | 3                  | 1.62E-02 |
| PLK4       | 4   | 7                  | 4.63E-01 | 7                  | 4.63E-01 | 6                  | 2.06E-02 | 6                  | 2.06E-02 | 3                  | 9.53E-03 | 3                  | 9.53E-03 |
| ATG7       | 3   | 2                  | 3.84E-01 | 2                  | 3.84E-01 | 2                  | 9.63E-03 | 2                  | 9.63E-03 | 3                  | 1.95E-02 | 3                  | 1.95E-02 |
| CCDC157    | 22  | 2                  | 3.35E-01 | 2                  | 3.35E-01 | 3                  | 9.87E-03 | 3                  | 9.87E-03 | 2                  | 3.49E-02 | 2                  | 3.49E-02 |
| PCDHGC3    | 5   | 2                  | 4.66E-01 | 2                  | 4.66E-01 | 3                  | 9.88E-03 | 3                  | 9.88E-03 | 2                  | 4.41E-02 | 2                  | 4.41E-02 |
| SRRM1      | 1   | 8                  | 1.53E-02 | 8                  | 1.53E-02 | 8                  | 4.98E-01 | 8                  | 4.98E-01 | 2                  | 1.02E-02 | 2                  | 1.02E-02 |
| ST6GALNAC1 | 17  | 1                  | 6.94E-02 | 1                  | 6.94E-02 | 1                  | 1.04E-02 | 1                  | 1.04E-02 | 2                  | 1.02E-01 | 2                  | 1.02E-01 |
| B9D1       | 17  |                    |          |                    |          | 1                  | 1.04E-02 | 1                  | 1.04E-02 | 1                  | 2.02E-02 | 1                  | 2.02E-02 |
| CIB2       | 15  |                    |          |                    |          | 1                  | 1.04E-02 | 1                  | 1.04E-02 | 1                  | 2.02E-02 | 1                  | 2.02E-02 |
| DDR GK1    | 20  |                    |          |                    |          | 1                  | 1.04E-02 | 1                  | 1.04E-02 | 1                  | 2.02E-02 | 1                  | 2.02E-02 |
| RPL15      | 3   | 1                  | 7.01E-02 | 1                  | 7.01E-02 | 1                  | 1.04E-02 | 1                  | 1.04E-02 | 1                  | 1.36E-01 | 1                  | 1.36E-01 |
| ENKD1      | 16  | 4                  | 6.34E-01 | 4                  | 6.34E-01 | 3                  | 2.52E-02 | 3                  | 2.52E-02 | 2                  | 1.06E-02 | 2                  | 1.06E-02 |
| GCNT1      | 9   | 3                  | 3.33E-01 | 3                  | 3.33E-01 | 4                  | 6.51E-02 | 4                  | 6.51E-02 | 3                  | 1.07E-02 | 3                  | 1.07E-02 |
| LIPK       | 10  | 7                  | 1.56E-01 | 7                  | 1.56E-01 | 7                  | 1.08E-02 | 7                  | 1.08E-02 | 1                  | 7.68E-02 | 1                  | 7.68E-02 |
| ZNF615     | 19  | 2                  | 8.42E-01 | 2                  | 8.42E-01 | 2                  | 1.08E-02 | 2                  | 1.08E-02 | 2                  | 2.38E-02 | 2                  | 2.38E-02 |
| CD93       | 20  | 1                  | 9.11E-02 | 1                  | 9.11E-02 | 1                  | 1.08E-02 | 1                  | 1.08E-02 | 1                  | 1.16E-01 | 1                  | 1.16E-01 |
| PPM1K      | 4   | 2                  | 1.85E-02 | 2                  | 1.85E-02 | 1                  | 1.08E-02 | 1                  | 1.08E-02 | 3                  | 2.13E-01 | 3                  | 2.13E-01 |
| CATSPER4   | 1   | 2                  | 1.60E-02 | 2                  | 1.60E-02 | 1                  | 1.08E-02 | 1                  | 1.08E-02 | 3                  | 2.35E-01 | 3                  | 2.35E-01 |
| PALM2      | 9   | 1                  | 2.05E-02 | 1                  | 2.05E-02 | 1                  | 1.08E-02 | 1                  | 1.08E-02 | 1                  | 2.10E-01 | 1                  | 2.10E-01 |
| PHACTR2    | 6   |                    |          |                    |          | 1                  | 1.08E-02 | 1                  | 1.08E-02 | 1                  | 1.88E-02 | 1                  | 1.88E-02 |
| QTRTD1     | 3   |                    |          |                    |          | 1                  | 1.08E-02 | 1                  | 1.08E-02 | 1                  | 1.88E-02 | 1                  | 1.88E-02 |
| RNF167     | 17  |                    |          |                    |          | 1                  | 1.08E-02 | 1                  | 1.08E-02 | 1                  | 1.88E-02 | 1                  | 1.88E-02 |
| SPNS2      | 17  | 1                  | 8.09E-02 | 1                  | 8.09E-02 | 1                  | 1.08E-02 | 1                  | 1.08E-02 | 2                  | 9.51E-02 | 2                  | 9.51E-02 |
| SYNCRIP    | 6   |                    |          |                    |          | 1                  | 1.08E-02 | 1                  | 1.08E-02 | 1                  | 1.88E-02 | 1                  | 1.88E-02 |
| ZNF155     | 19  |                    |          |                    |          | 1                  | 1.08E-02 | 1                  | 1.08E-02 | 1                  | 1.88E-02 | 1                  | 1.88E-02 |
| MYBBP1A    | 17  | 11                 | 8.82E-02 | 11                 | 8.82E-02 | 10                 | 1.84E-01 | 10                 | 1.84E-01 | 5                  | 1.09E-02 | 5                  | 1.09E-02 |
| PIK3CG     | 7   |                    |          | 1                  | 5.37E-01 | 1                  | 1.80E-02 | 2                  | 1.10E-02 | 1                  | 3.07E-02 | 2                  | 2.82E-02 |
| CALML5     | 10  | 1                  | 7.04E-02 | 1                  | 7.04E-02 | 1                  | 1.12E-02 | 1                  | 1.12E-02 | 1                  | 1.22E-01 | 1                  | 1.22E-01 |
| DHDDS      | 1   |                    |          |                    |          | 1                  | 1.12E-02 | 1                  | 1.12E-02 | 1                  | 2.09E-02 | 1                  | 2.09E-02 |
| EAPP       | 14  |                    |          |                    |          | 1                  | 1.12E-02 | 1                  | 1.12E-02 | 1                  | 2.09E-02 | 1                  | 2.09E-02 |
| SMUG1      | 12  |                    |          |                    |          | 1                  | 1.12E-02 | 1                  | 1.12E-02 | 1                  | 2.09E-02 | 1                  | 2.09E-02 |
| ADGRB1     | 8   | 1                  | 7.19E-02 | 1                  | 7.19E-02 | 1                  | 1.17E-02 | 1                  | 1.17E-02 | 2                  | 1.04E-01 | 2                  | 1.04E-01 |
| ATG16L2    | 11  | 1                  | 7.82E-02 | 1                  | 7.82E-02 | 1                  | 1.17E-02 | 1                  | 1.17E-02 | 2                  | 1.03E-01 | 2                  | 1.03E-01 |
| C5orf49    | 5   |                    |          | 1                  | 3.85E-01 | 1                  | 1.17E-02 | 2                  | 1.18E-02 | 1                  | 2.20E-02 | 2                  | 2.22E-02 |
| IFI16      | 1   |                    |          |                    |          | 1                  | 1.17E-02 | 1                  | 1.17E-02 | 1                  | 2.20E-02 | 1                  | 2.20E-02 |
| METTL21A   | 2   | 1                  | 7.64E-02 | 1                  | 7.64E-02 | 1                  | 1.17E-02 | 1                  | 1.17E-02 | 2                  | 1.03E-01 | 2                  | 1.03E-01 |

| SetID       | Chr | ADEH- vs NA        |          |                    |          | ADEH+ vs ADEH-     |          |                    |          | ADEH+ vs NA        |          |                    |          |
|-------------|-----|--------------------|----------|--------------------|----------|--------------------|----------|--------------------|----------|--------------------|----------|--------------------|----------|
|             |     | rarenovel          |          | all                |          | rarenovel          |          | all                |          | rarenovel          |          | all                |          |
|             |     | N variants in test | p-value  | N variants in test | p-value  | N variants in test | p-value  | N variants in test | p-value  | N variants in test | p-value  | N variants in test | p-value  |
| NKX2-4      | 20  |                    |          |                    |          | 1                  | 1.17E-02 | 1                  | 1.17E-02 | 1                  | 2.20E-02 | 1                  | 2.20E-02 |
| OR2T1       | 1   |                    |          |                    |          | 1                  | 1.17E-02 | 1                  | 1.17E-02 | 1                  | 2.20E-02 | 1                  | 2.20E-02 |
| OR2T8       | 1   |                    |          |                    |          | 1                  | 1.17E-02 | 1                  | 1.17E-02 | 1                  | 2.20E-02 | 1                  | 2.20E-02 |
| RB1         | 13  | 1                  | 8.44E-02 | 1                  | 8.44E-02 | 1                  | 1.17E-02 | 1                  | 1.17E-02 | 2                  | 1.03E-01 | 2                  | 1.03E-01 |
| SAMD5       | 6   |                    |          |                    |          | 1                  | 1.17E-02 | 1                  | 1.17E-02 | 1                  | 2.20E-02 | 1                  | 2.20E-02 |
| TAX1BP1     | 7   |                    |          |                    |          | 1                  | 1.17E-02 | 1                  | 1.17E-02 | 1                  | 2.20E-02 | 1                  | 2.20E-02 |
| FMO1        | 1   |                    |          |                    |          | 1                  | 1.18E-02 | 1                  | 1.18E-02 | 1                  | 2.21E-02 | 1                  | 2.21E-02 |
| INTS5       | 11  |                    |          |                    |          | 1                  | 1.18E-02 | 1                  | 1.18E-02 | 1                  | 2.21E-02 | 1                  | 2.21E-02 |
| ITGB1BP1    | 2   |                    |          |                    |          | 1                  | 1.18E-02 | 1                  | 1.18E-02 | 1                  | 2.21E-02 | 1                  | 2.21E-02 |
| PEX26       | 22  | 1                  | 8.08E-02 | 1                  | 8.08E-02 | 1                  | 1.18E-02 | 1                  | 1.18E-02 | 2                  | 1.08E-01 | 2                  | 1.08E-01 |
| TLR6        | 4   |                    |          |                    |          | 1                  | 1.18E-02 | 1                  | 1.18E-02 | 1                  | 2.21E-02 | 1                  | 2.21E-02 |
| TRAT1       | 3   |                    |          |                    |          | 1                  | 1.18E-02 | 1                  | 1.18E-02 | 1                  | 2.21E-02 | 1                  | 2.21E-02 |
| UNC5D       | 8   |                    |          |                    |          | 1                  | 1.18E-02 | 1                  | 1.18E-02 | 1                  | 2.21E-02 | 1                  | 2.21E-02 |
| PRR25       | 16  |                    |          |                    |          | 1                  | 1.18E-02 | 1                  | 1.18E-02 | 1                  | 2.35E-02 | 1                  | 2.35E-02 |
| ADO         | 10  | 1                  | 7.42E-02 | 1                  | 7.42E-02 | 1                  | 1.18E-02 | 1                  | 1.18E-02 | 1                  | 1.70E-01 | 1                  | 1.70E-01 |
| ANTXR2      | 4   | 1                  | 6.93E-02 | 1                  | 6.93E-02 | 1                  | 1.18E-02 | 1                  | 1.18E-02 | 2                  | 1.26E-01 | 2                  | 1.26E-01 |
| BEST3       | 12  |                    |          | 1                  | 1.40E-01 | 1                  | 1.18E-02 | 2                  | 4.86E-02 | 1                  | 2.35E-02 | 2                  | 7.53E-02 |
| CUEDC2      | 10  |                    |          |                    |          | 1                  | 1.18E-02 | 1                  | 1.18E-02 | 1                  | 2.35E-02 | 1                  | 2.35E-02 |
| FAM50B      | 6   |                    |          |                    |          | 1                  | 1.18E-02 | 1                  | 1.18E-02 | 1                  | 2.35E-02 | 1                  | 2.35E-02 |
| HAUS2       | 15  |                    |          |                    |          | 1                  | 1.18E-02 | 1                  | 1.18E-02 | 1                  | 2.35E-02 | 1                  | 2.35E-02 |
| OR5K4       | 3   |                    |          |                    |          | 1                  | 1.18E-02 | 1                  | 1.18E-02 | 1                  | 2.35E-02 | 1                  | 2.35E-02 |
| SMARCD2     | 17  |                    |          |                    |          | 1                  | 1.18E-02 | 1                  | 1.18E-02 | 1                  | 2.35E-02 | 1                  | 2.35E-02 |
| TEX38       | 1   |                    |          |                    |          | 1                  | 1.18E-02 | 1                  | 1.18E-02 | 1                  | 2.35E-02 | 1                  | 2.35E-02 |
| ADAM33      | 20  | 1                  | 7.45E-02 | 1                  | 7.45E-02 | 1                  | 1.18E-02 | 1                  | 1.18E-02 | 2                  | 1.19E-01 | 2                  | 1.19E-01 |
| OR14I1      | 1   |                    |          | 1                  | 5.21E-01 | 1                  | 1.18E-02 | 2                  | 1.83E-02 | 1                  | 2.36E-02 | 2                  | 3.91E-02 |
| TICAM2      | 5   |                    |          |                    |          | 1                  | 1.18E-02 | 1                  | 1.18E-02 | 1                  | 2.36E-02 | 1                  | 2.36E-02 |
| TMED7-TICAM | 5   |                    |          |                    |          | 1                  | 1.18E-02 | 1                  | 1.18E-02 | 1                  | 2.36E-02 | 1                  | 2.36E-02 |
| TPCN1       | 12  | 1                  | 7.40E-02 | 1                  | 7.40E-02 | 1                  | 1.18E-02 | 1                  | 1.18E-02 | 2                  | 1.18E-01 | 2                  | 1.18E-01 |
| CYC1        | 8   | 1                  | 8.37E-02 | 1                  | 8.37E-02 | 1                  | 1.19E-02 | 1                  | 1.19E-02 | 2                  | 1.17E-01 | 2                  | 1.17E-01 |
| KIAA1279    | 10  | 2                  | 1.89E-02 | 2                  | 1.89E-02 | 1                  | 1.19E-02 | 1                  | 1.19E-02 | 3                  | 2.69E-01 | 3                  | 2.69E-01 |
| CNPY3       | 6   |                    |          |                    |          | 1                  | 1.19E-02 | 1                  | 1.19E-02 | 1                  | 2.50E-02 | 1                  | 2.50E-02 |
| AGO4        | 1   |                    |          |                    |          | 1                  | 1.19E-02 | 1                  | 1.19E-02 | 1                  | 2.50E-02 | 1                  | 2.50E-02 |
| C19orf25    | 19  |                    |          |                    |          | 1                  | 1.19E-02 | 1                  | 1.19E-02 | 1                  | 2.50E-02 | 1                  | 2.50E-02 |
| CLCN3       | 4   |                    |          |                    |          | 1                  | 1.19E-02 | 1                  | 1.19E-02 | 1                  | 2.50E-02 | 1                  | 2.50E-02 |
| GALNT1      | 18  |                    |          |                    |          | 1                  | 1.19E-02 | 1                  | 1.19E-02 | 1                  | 2.50E-02 | 1                  | 2.50E-02 |
| OSR1        | 2   |                    |          |                    |          | 1                  | 1.19E-02 | 1                  | 1.19E-02 | 1                  | 2.50E-02 | 1                  | 2.50E-02 |
| WNT11       | 11  | 2                  | 1.77E-02 | 2                  | 1.77E-02 | 1                  | 1.19E-02 | 1                  | 1.19E-02 | 2                  | 3.42E-01 | 2                  | 3.42E-01 |
| AP4E1       | 15  | 3                  | 8.60E-03 | 3                  | 8.60E-03 | 1                  | 1.20E-02 | 1                  | 1.20E-02 | 4                  | 4.27E-01 | 4                  | 4.27E-01 |
| ALG14       | 1   | 1                  | 7.33E-02 | 1                  | 7.33E-02 | 1                  | 1.20E-02 | 1                  | 1.20E-02 | 2                  | 1.11E-01 | 2                  | 1.11E-01 |
| CYP4F22     | 19  |                    |          |                    |          | 1                  | 1.20E-02 | 1                  | 1.20E-02 | 1                  | 2.39E-02 | 1                  | 2.39E-02 |
| DIAPH1      | 5   |                    |          |                    |          | 1                  | 1.20E-02 | 1                  | 1.20E-02 | 1                  | 2.39E-02 | 1                  | 2.39E-02 |
| ZCCHC17     | 1   |                    |          |                    |          | 1                  | 1.20E-02 | 1                  | 1.20E-02 | 1                  | 2.39E-02 | 1                  | 2.39E-02 |
| HIST1H4L    | 6   |                    |          |                    |          | 1                  | 1.20E-02 | 1                  | 1.20E-02 | 1                  | 2.49E-02 | 1                  | 2.49E-02 |
| RAMP2       | 17  | 1                  | 8.13E-02 | 1                  | 8.13E-02 | 1                  | 1.20E-02 | 1                  | 1.20E-02 | 2                  | 1.18E-01 | 2                  | 1.18E-01 |
| ZNF726      | 19  | 1                  | 5.95E-03 | 1                  | 5.95E-03 | 1                  | 1.23E-02 | 1                  | 1.23E-02 | 1                  | 1.00E+00 | 1                  | 1.00E+00 |
| ADCY1       | 7   |                    |          |                    |          | 1                  | 1.23E-02 | 1                  | 1.23E-02 | 1                  | 2.67E-02 | 1                  | 2.67E-02 |
| RBM45       | 2   |                    |          |                    |          | 1                  | 1.23E-02 | 1                  | 1.23E-02 | 1                  | 2.67E-02 | 1                  | 2.67E-02 |
| RPRD2       | 1   | 1                  | 6.65E-02 | 1                  | 6.65E-02 | 1                  | 1.23E-02 | 1                  | 1.23E-02 | 2                  | 1.34E-01 | 2                  | 1.34E-01 |

| SetID    | Chr | ADEH- vs NA        |          |                    |          | ADEH+ vs ADEH-     |          |                    |          | ADEH+ vs NA        |          |                    |          |
|----------|-----|--------------------|----------|--------------------|----------|--------------------|----------|--------------------|----------|--------------------|----------|--------------------|----------|
|          |     | rarenovel          |          | all                |          | rarenovel          |          | all                |          | rarenovel          |          | all                |          |
|          |     | N variants in test | p-value  | N variants in test | p-value  | N variants in test | p-value  | N variants in test | p-value  | N variants in test | p-value  | N variants in test | p-value  |
| CDH13    | 16  |                    |          |                    |          | 1                  | 1.24E-02 | 1                  | 1.24E-02 | 1                  | 2.52E-02 | 1                  | 2.52E-02 |
| ARHGAP19 | 10  | 1                  | 7.42E-02 | 1                  | 7.42E-02 | 1                  | 1.24E-02 | 1                  | 1.24E-02 | 2                  | 1.20E-01 | 2                  | 1.20E-01 |
| BID      | 22  |                    |          |                    |          | 1                  | 1.24E-02 | 1                  | 1.24E-02 | 1                  | 2.52E-02 | 1                  | 2.52E-02 |
| BRSK2    | 11  | 1                  | 7.82E-02 | 1                  | 7.82E-02 | 1                  | 1.24E-02 | 1                  | 1.24E-02 | 2                  | 1.17E-01 | 2                  | 1.17E-01 |
| KRTAP3-1 | 17  |                    |          |                    |          | 1                  | 1.24E-02 | 1                  | 1.24E-02 | 1                  | 2.52E-02 | 1                  | 2.52E-02 |
| REC114   | 15  | 1                  | 8.56E-02 | 1                  | 8.56E-02 | 1                  | 1.24E-02 | 1                  | 1.24E-02 | 1                  | 9.84E-02 | 1                  | 9.84E-02 |
| SLC44A3  | 1   |                    |          |                    |          | 1                  | 1.24E-02 | 1                  | 1.24E-02 | 1                  | 2.52E-02 | 1                  | 2.52E-02 |
| SPINK14  | 5   |                    |          |                    |          | 1                  | 1.24E-02 | 1                  | 1.24E-02 | 1                  | 2.52E-02 | 1                  | 2.52E-02 |
| PTGER2   | 14  | 2                  | 1.52E-02 | 2                  | 1.52E-02 | 2                  | 1.26E-02 | 2                  | 1.26E-02 | 3                  | 3.85E-01 | 3                  | 3.85E-01 |
| HDAC2    | 6   |                    |          |                    |          | 1                  | 1.28E-02 | 1                  | 1.28E-02 | 1                  | 2.46E-02 | 1                  | 2.46E-02 |
| MBP      | 18  |                    |          |                    |          | 1                  | 1.28E-02 | 1                  | 1.28E-02 | 1                  | 2.46E-02 | 1                  | 2.46E-02 |
| PHF11    | 13  | 1                  | 7.90E-02 | 1                  | 7.90E-02 | 1                  | 1.28E-02 | 1                  | 1.28E-02 | 2                  | 1.11E-01 | 2                  | 1.11E-01 |
| RGS7     | 1   |                    |          |                    |          | 1                  | 1.28E-02 | 1                  | 1.28E-02 | 1                  | 2.46E-02 | 1                  | 2.46E-02 |
| TOMM34   | 20  |                    |          |                    |          | 1                  | 1.28E-02 | 1                  | 1.28E-02 | 1                  | 2.46E-02 | 1                  | 2.46E-02 |
| ZEB2     | 2   |                    |          |                    |          | 1                  | 1.28E-02 | 1                  | 1.28E-02 | 1                  | 2.46E-02 | 1                  | 2.46E-02 |
| ZNF34    | 8   |                    |          |                    |          | 1                  | 1.28E-02 | 1                  | 1.28E-02 | 1                  | 2.46E-02 | 1                  | 2.46E-02 |
| PARP14   | 3   | 3                  | 5.66E-02 | 4                  | 1.06E-01 | 4                  | 3.05E-02 | 5                  | 1.28E-02 | 3                  | 1.01E-01 | 4                  | 5.68E-02 |
| DCP1B    | 12  | 4                  | 1.35E-01 | 4                  | 1.35E-01 | 4                  | 1.32E-02 | 4                  | 1.32E-02 | 1                  | 1.02E-01 | 1                  | 1.02E-01 |
| CCNH     | 5   |                    |          | 1                  | 4.02E-01 | 1                  | 1.35E-02 | 2                  | 1.33E-02 | 1                  | 2.27E-02 | 2                  | 2.14E-02 |
| VWA8     | 13  | 12                 | 3.38E-02 | 13                 | 3.38E-02 | 10                 | 8.20E-02 | 11                 | 8.20E-02 | 9                  | 1.34E-02 | 10                 | 1.34E-02 |
| ST3GAL5  | 2   |                    |          |                    |          | 1                  | 1.34E-02 | 1                  | 1.34E-02 | 1                  | 2.76E-02 | 1                  | 2.76E-02 |
| HPGDS    | 4   | 2                  | 2.25E-02 | 2                  | 2.25E-02 | 1                  | 1.34E-02 | 1                  | 1.34E-02 | 3                  | 2.26E-01 | 3                  | 2.26E-01 |
| LRRC57   | 15  |                    |          |                    |          | 1                  | 1.34E-02 | 1                  | 1.34E-02 | 1                  | 2.76E-02 | 1                  | 2.76E-02 |
| ZFR      | 5   |                    |          |                    |          | 1                  | 1.34E-02 | 1                  | 1.34E-02 | 1                  | 2.76E-02 | 1                  | 2.76E-02 |
| COMT     | 22  |                    |          |                    |          | 1                  | 1.34E-02 | 1                  | 1.34E-02 | 1                  | 2.83E-02 | 1                  | 2.83E-02 |
| PCDHB7   | 5   | 2                  | 1.60E-02 | 2                  | 1.60E-02 | 1                  | 1.34E-02 | 1                  | 1.34E-02 | 2                  | 3.68E-01 | 2                  | 3.68E-01 |
| RFXANK   | 19  | 1                  | 8.54E-02 | 1                  | 8.54E-02 | 1                  | 1.34E-02 | 1                  | 1.34E-02 | 2                  | 1.34E-01 | 2                  | 1.34E-01 |
| VDAC3    | 8   | 1                  | 7.19E-02 | 1                  | 7.19E-02 | 1                  | 1.34E-02 | 1                  | 1.34E-02 | 2                  | 1.35E-01 | 2                  | 1.35E-01 |
| ARGLU1   | 13  |                    |          |                    |          | 1                  | 1.35E-02 | 1                  | 1.35E-02 | 1                  | 2.27E-02 | 1                  | 2.27E-02 |
| EFEMP2   | 11  |                    |          |                    |          | 1                  | 1.35E-02 | 1                  | 1.35E-02 | 1                  | 2.27E-02 | 1                  | 2.27E-02 |
| KLHDC10  | 7   |                    |          |                    |          | 1                  | 1.35E-02 | 1                  | 1.35E-02 | 1                  | 2.27E-02 | 1                  | 2.27E-02 |
| MAN2A1   | 5   |                    |          |                    |          | 1                  | 1.35E-02 | 1                  | 1.35E-02 | 1                  | 2.27E-02 | 1                  | 2.27E-02 |
| OPN3     | 1   | 1                  | 7.96E-02 | 1                  | 7.96E-02 | 1                  | 1.35E-02 | 1                  | 1.35E-02 | 2                  | 1.10E-01 | 2                  | 1.10E-01 |
| PRKAR2A  | 3   | 1                  | 6.54E-02 | 1                  | 6.54E-02 | 1                  | 1.35E-02 | 1                  | 1.35E-02 | 1                  | 1.21E-01 | 1                  | 1.21E-01 |
| BRI3     | 7   |                    |          |                    |          | 1                  | 1.35E-02 | 1                  | 1.35E-02 | 1                  | 2.27E-02 | 1                  | 2.27E-02 |
| SLC24A1  | 15  | 1                  | 7.52E-02 | 2                  | 1.16E-02 | 1                  | 1.46E-02 | 2                  | 1.35E-02 | 2                  | 1.46E-01 | 3                  | 1.47E-01 |
| AFG3L2   | 18  |                    |          |                    |          | 1                  | 1.35E-02 | 1                  | 1.35E-02 | 1                  | 2.52E-02 | 1                  | 2.52E-02 |
| NUTM1    | 15  | 1                  | 1.00E-01 | 3                  | 7.59E-01 | 1                  | 1.35E-02 | 3                  | 8.85E-02 | 2                  | 1.17E-01 | 4                  | 1.89E-01 |
| SLC5A8   | 12  |                    |          |                    |          | 1                  | 1.35E-02 | 1                  | 1.35E-02 | 1                  | 2.52E-02 | 1                  | 2.52E-02 |
| C15orf43 | 15  |                    |          |                    |          | 1                  | 1.35E-02 | 1                  | 1.35E-02 | 1                  | 2.53E-02 | 1                  | 2.53E-02 |
| ACTR1B   | 2   |                    |          | 1                  | 3.40E-01 | 1                  | 1.35E-02 | 2                  | 6.26E-02 | 1                  | 2.53E-02 | 2                  | 5.43E-02 |
| CACNG4   | 17  |                    |          |                    |          | 1                  | 1.35E-02 | 1                  | 1.35E-02 | 1                  | 2.53E-02 | 1                  | 2.53E-02 |
| EOMES    | 3   |                    |          |                    |          | 1                  | 1.35E-02 | 1                  | 1.35E-02 | 1                  | 2.53E-02 | 1                  | 2.53E-02 |
| EXTL2    | 1   |                    |          |                    |          | 1                  | 1.35E-02 | 1                  | 1.35E-02 | 1                  | 2.53E-02 | 1                  | 2.53E-02 |
| KLRG2    | 7   |                    |          |                    |          | 1                  | 1.35E-02 | 1                  | 1.35E-02 | 1                  | 2.53E-02 | 1                  | 2.53E-02 |
| STX16    | 20  |                    |          |                    |          | 1                  | 1.35E-02 | 1                  | 1.35E-02 | 1                  | 2.53E-02 | 1                  | 2.53E-02 |
| ZW10     | 11  |                    |          |                    |          | 1                  | 1.35E-02 | 1                  | 1.35E-02 | 1                  | 2.53E-02 | 1                  | 2.53E-02 |
| ZNF688   | 16  | 1                  | 8.73E-02 | 1                  | 8.73E-02 | 1                  | 1.35E-02 | 1                  | 1.35E-02 | 1                  | 1.71E-01 | 1                  | 1.71E-01 |

| SetID        | Chr | ADEH- vs NA        |          |                    |          | ADEH+ vs ADEH-     |          |                    |          | ADEH+ vs NA        |          |                    |          |
|--------------|-----|--------------------|----------|--------------------|----------|--------------------|----------|--------------------|----------|--------------------|----------|--------------------|----------|
|              |     | rarenovel          |          | all                |          | rarenovel          |          | all                |          | rarenovel          |          | all                |          |
|              |     | N variants in test | p-value  | N variants in test | p-value  | N variants in test | p-value  | N variants in test | p-value  | N variants in test | p-value  | N variants in test | p-value  |
| ANKRD54      | 22  |                    |          |                    |          | 1                  | 1.35E-02 | 1                  | 1.35E-02 | 1                  | 2.83E-02 | 1                  | 2.83E-02 |
| CPN2         | 3   |                    |          |                    |          | 1                  | 1.35E-02 | 1                  | 1.35E-02 | 1                  | 2.83E-02 | 1                  | 2.83E-02 |
| KIF5A        | 12  | 1                  | 6.56E-02 | 1                  | 6.56E-02 | 1                  | 1.35E-02 | 1                  | 1.35E-02 | 2                  | 1.42E-01 | 2                  | 1.42E-01 |
| NTSR2        | 2   | 1                  | 6.97E-02 | 1                  | 6.97E-02 | 1                  | 1.35E-02 | 1                  | 1.35E-02 | 1                  | 1.92E-01 | 1                  | 1.92E-01 |
| SARDH        | 9   |                    |          |                    |          | 1                  | 1.35E-02 | 1                  | 1.35E-02 | 1                  | 2.83E-02 | 1                  | 2.83E-02 |
| SLC12A2      | 5   |                    |          |                    |          | 1                  | 1.35E-02 | 1                  | 1.35E-02 | 1                  | 2.83E-02 | 1                  | 2.83E-02 |
| SLC39A6      | 18  | 1                  | 6.45E-02 | 1                  | 6.45E-02 | 1                  | 1.35E-02 | 1                  | 1.35E-02 | 2                  | 1.42E-01 | 2                  | 1.42E-01 |
| METTL20      | 12  | 1                  | 5.17E-01 | 1                  | 5.17E-01 | 1                  | 1.38E-02 | 1                  | 1.38E-02 | 1                  | 7.34E-02 | 1                  | 7.34E-02 |
| ADGRG1       | 16  | 2                  | 3.35E-02 | 2                  | 3.35E-02 | 2                  | 1.41E-02 | 2                  | 1.41E-02 | 1                  | 2.23E-01 | 1                  | 2.23E-01 |
| IREB2        | 15  | 1                  | 8.85E-01 | 1                  | 8.85E-01 | 1                  | 1.42E-02 | 1                  | 1.42E-02 | 1                  | 2.50E-02 | 1                  | 2.50E-02 |
| LRRC17       | 7   | 2                  | 1.00E+00 | 3                  | 1.00E+00 | 2                  | 1.42E-02 | 3                  | 1.56E-02 | 1                  | 3.16E-02 | 2                  | 3.68E-02 |
| GALNT3       | 2   | 1                  | 6.27E-02 | 1                  | 6.27E-02 | 1                  | 1.43E-02 | 1                  | 1.43E-02 | 1                  | 1.50E-01 | 1                  | 1.50E-01 |
| KIF4B        | 5   |                    |          | 1                  | 5.83E-01 | 1                  | 1.43E-02 | 2                  | 1.48E-02 | 1                  | 2.62E-02 | 2                  | 2.68E-02 |
| DEF8         | 16  |                    |          |                    |          | 1                  | 1.43E-02 | 1                  | 1.43E-02 | 1                  | 2.71E-02 | 1                  | 2.71E-02 |
| NLRC4        | 2   | 2                  | 6.85E-03 | 2                  | 6.85E-03 | 1                  | 1.43E-02 | 1                  | 1.43E-02 | 3                  | 2.94E-01 | 3                  | 2.94E-01 |
| FCRL6        | 1   |                    |          | 2                  | 5.73E-01 | 1                  | 1.43E-02 | 3                  | 8.68E-02 | 1                  | 2.71E-02 | 3                  | 1.89E-01 |
| GSDMD        | 8   |                    |          |                    |          | 1                  | 1.43E-02 | 1                  | 1.43E-02 | 1                  | 2.71E-02 | 1                  | 2.71E-02 |
| LOC653602    | 2   |                    |          |                    |          | 1                  | 1.43E-02 | 1                  | 1.43E-02 | 1                  | 2.71E-02 | 1                  | 2.71E-02 |
| B3GLCT       | 13  |                    |          |                    |          | 1                  | 1.43E-02 | 1                  | 1.43E-02 | 1                  | 3.02E-02 | 1                  | 3.02E-02 |
| KLHL26       | 19  |                    |          |                    |          | 1                  | 1.43E-02 | 1                  | 1.43E-02 | 1                  | 3.02E-02 | 1                  | 3.02E-02 |
| PCF11        | 11  |                    |          |                    |          | 1                  | 1.43E-02 | 1                  | 1.43E-02 | 1                  | 3.02E-02 | 1                  | 3.02E-02 |
| SDHB         | 1   |                    |          |                    |          | 1                  | 1.43E-02 | 1                  | 1.43E-02 | 1                  | 3.02E-02 | 1                  | 3.02E-02 |
| TCP1         | 6   |                    |          |                    |          | 1                  | 1.43E-02 | 1                  | 1.43E-02 | 1                  | 3.02E-02 | 1                  | 3.02E-02 |
| SUN1         | 7   | 4                  | 9.86E-03 | 4                  | 9.86E-03 | 1                  | 1.44E-02 | 1                  | 1.44E-02 | 4                  | 3.75E-01 | 4                  | 3.75E-01 |
| ZNF577       | 19  | 5                  | 1.10E-01 | 5                  | 1.10E-01 | 2                  | 1.52E-01 | 2                  | 1.52E-01 | 5                  | 1.46E-02 | 5                  | 1.46E-02 |
| NTAN1        | 16  |                    |          |                    |          | 1                  | 1.46E-02 | 1                  | 1.46E-02 | 1                  | 2.90E-02 | 1                  | 2.90E-02 |
| UTS2R        | 17  | 1                  | 8.60E-02 | 1                  | 8.60E-02 | 1                  | 1.46E-02 | 1                  | 1.46E-02 | 2                  | 1.39E-01 | 2                  | 1.39E-01 |
| NOLC1        | 10  | 3                  | 7.89E-03 | 3                  | 7.89E-03 | 1                  | 1.47E-02 | 1                  | 1.47E-02 | 3                  | 6.17E-01 | 3                  | 6.17E-01 |
| CNTROB       | 17  | 2                  | 1.63E-02 | 2                  | 1.63E-02 | 1                  | 1.47E-02 | 1                  | 1.47E-02 | 3                  | 2.95E-01 | 3                  | 2.95E-01 |
| EEF2K        | 16  | 2                  | 5.39E-01 | 3                  | 8.05E-01 | 2                  | 4.58E-02 | 3                  | 5.23E-02 | 1                  | 1.48E-02 | 2                  | 1.63E-02 |
| NCKAP5       | 2   | 3                  | 3.17E-01 | 5                  | 1.93E-01 | 4                  | 2.38E-01 | 6                  | 2.39E-01 | 1                  | 2.77E-02 | 3                  | 1.48E-02 |
| PDCD2        | 6   |                    |          |                    |          | 1                  | 1.49E-02 | 1                  | 1.49E-02 | 1                  | 3.00E-02 | 1                  | 3.00E-02 |
| FLOT2        | 17  | 2                  | 1.88E-02 | 2                  | 1.88E-02 | 1                  | 1.49E-02 | 1                  | 1.49E-02 | 3                  | 3.16E-01 | 3                  | 3.16E-01 |
| CD74         | 5   | 2                  | 1.96E-02 | 2                  | 1.96E-02 | 1                  | 1.49E-02 | 1                  | 1.49E-02 | 3                  | 3.26E-01 | 3                  | 3.26E-01 |
| CDH6         | 5   |                    |          |                    |          | 1                  | 1.49E-02 | 1                  | 1.49E-02 | 1                  | 3.00E-02 | 1                  | 3.00E-02 |
| DMTF1        | 7   |                    |          |                    |          | 1                  | 1.49E-02 | 1                  | 1.49E-02 | 1                  | 3.00E-02 | 1                  | 3.00E-02 |
| FAM198B      | 4   | 1                  | 6.43E-02 | 1                  | 6.43E-02 | 1                  | 1.49E-02 | 1                  | 1.49E-02 | 1                  | 2.30E-01 | 1                  | 2.30E-01 |
| GLT6D1       | 9   | 2                  | 5.04E-02 | 3                  | 5.91E-02 | 2                  | 1.09E-01 | 3                  | 1.15E-01 | 2                  | 1.50E-02 | 3                  | 1.52E-02 |
| ASPSCR1      | 17  | 1                  | 6.83E-02 | 1                  | 6.83E-02 | 1                  | 1.51E-02 | 1                  | 1.51E-02 | 2                  | 1.53E-01 | 2                  | 1.53E-01 |
| BRINP3       | 1   |                    |          |                    |          | 1                  | 1.51E-02 | 1                  | 1.51E-02 | 1                  | 2.56E-02 | 1                  | 2.56E-02 |
| CCRL2        | 3   |                    |          |                    |          | 1                  | 1.51E-02 | 1                  | 1.51E-02 | 1                  | 2.56E-02 | 1                  | 2.56E-02 |
| CETN3        | 5   | 1                  | 1.08E-01 | 1                  | 1.08E-01 | 1                  | 1.51E-02 | 1                  | 1.51E-02 | 1                  | 1.93E-01 | 1                  | 1.93E-01 |
| FYN          | 6   |                    |          |                    |          | 1                  | 1.51E-02 | 1                  | 1.51E-02 | 1                  | 2.56E-02 | 1                  | 2.56E-02 |
| KLHL32       | 6   |                    |          |                    |          | 1                  | 1.51E-02 | 1                  | 1.51E-02 | 1                  | 2.56E-02 | 1                  | 2.56E-02 |
| LOC100134391 | 17  |                    |          |                    |          | 1                  | 1.51E-02 | 1                  | 1.51E-02 | 1                  | 2.56E-02 | 1                  | 2.56E-02 |
| UBE2D3       | 4   |                    |          |                    |          | 1                  | 1.51E-02 | 1                  | 1.51E-02 | 1                  | 2.56E-02 | 1                  | 2.56E-02 |
| ZG16B        | 16  | 1                  | 7.46E-02 | 1                  | 7.46E-02 | 1                  | 1.51E-02 | 1                  | 1.51E-02 | 2                  | 1.53E-01 | 2                  | 1.53E-01 |
| MMP9         | 20  | 4                  | 1.83E-01 | 4                  | 1.83E-01 | 2                  | 1.51E-02 | 2                  | 1.51E-02 | 4                  | 1.65E-01 | 4                  | 1.65E-01 |

| SetID   | Chr | ADEH- vs NA        |          |                    |          | ADEH+ vs ADEH-     |          |                    |          | ADEH+ vs NA        |          |                    |          |
|---------|-----|--------------------|----------|--------------------|----------|--------------------|----------|--------------------|----------|--------------------|----------|--------------------|----------|
|         |     | rarenovel          |          | all                |          | rarenovel          |          | all                |          | rarenovel          |          | all                |          |
|         |     | N variants in test | p-value  | N variants in test | p-value  | N variants in test | p-value  | N variants in test | p-value  | N variants in test | p-value  | N variants in test | p-value  |
| CARD11  | 7   |                    |          |                    |          | 1                  | 1.53E-02 | 1                  | 1.53E-02 | 1                  | 2.77E-02 | 1                  | 2.77E-02 |
| ZNF226  | 19  | 4                  | 7.48E-03 | 4                  | 7.48E-03 | 1                  | 1.53E-02 | 1                  | 1.53E-02 | 4                  | 6.36E-01 | 4                  | 6.36E-01 |
| KCTD13  | 16  |                    |          |                    |          | 1                  | 1.53E-02 | 1                  | 1.53E-02 | 1                  | 2.77E-02 | 1                  | 2.77E-02 |
| CCT8    | 21  | 1                  | 7.05E-02 | 1                  | 7.05E-02 | 1                  | 1.53E-02 | 1                  | 1.53E-02 | 2                  | 1.25E-01 | 2                  | 1.25E-01 |
| CDK19   | 6   | 1                  | 1.10E-01 | 1                  | 1.10E-01 | 1                  | 1.53E-02 | 1                  | 1.53E-02 | 2                  | 1.27E-01 | 2                  | 1.27E-01 |
| OXNAD1  | 3   | 1                  | 7.71E-02 | 1                  | 7.71E-02 | 1                  | 1.53E-02 | 1                  | 1.53E-02 | 2                  | 1.28E-01 | 2                  | 1.28E-01 |
| ERG     | 21  |                    |          |                    |          | 1                  | 1.54E-02 | 1                  | 1.54E-02 | 1                  | 2.76E-02 | 1                  | 2.76E-02 |
| ANKRD52 | 12  |                    |          |                    |          | 1                  | 1.54E-02 | 1                  | 1.54E-02 | 1                  | 2.76E-02 | 1                  | 2.76E-02 |
| LRIT1   | 10  |                    |          |                    |          | 1                  | 1.54E-02 | 1                  | 1.54E-02 | 1                  | 2.76E-02 | 1                  | 2.76E-02 |
| MYCBP2  | 13  | 1                  | 6.51E-02 | 1                  | 6.51E-02 | 1                  | 1.54E-02 | 1                  | 1.54E-02 | 2                  | 1.22E-01 | 2                  | 1.22E-01 |
| NOD1    | 7   |                    |          |                    |          | 1                  | 1.54E-02 | 1                  | 1.54E-02 | 1                  | 2.76E-02 | 1                  | 2.76E-02 |
| NT5C1A  | 1   | 2                  | 2.12E-02 | 2                  | 2.12E-02 | 1                  | 1.54E-02 | 1                  | 1.54E-02 | 2                  | 3.91E-01 | 2                  | 3.91E-01 |
| PRSS33  | 16  |                    |          |                    |          | 1                  | 1.54E-02 | 1                  | 1.54E-02 | 1                  | 2.76E-02 | 1                  | 2.76E-02 |
| RFX5    | 1   |                    |          |                    |          | 1                  | 1.54E-02 | 1                  | 1.54E-02 | 1                  | 2.76E-02 | 1                  | 2.76E-02 |
| ZNF662  | 3   | 1                  | 8.49E-02 | 1                  | 8.49E-02 | 1                  | 1.54E-02 | 1                  | 1.54E-02 | 2                  | 1.29E-01 | 2                  | 1.29E-01 |
| GPR151  | 5   | 2                  | 7.92E-01 | 3                  | 5.24E-01 | 2                  | 1.54E-02 | 3                  | 1.82E-02 | 2                  | 4.88E-02 | 3                  | 4.94E-02 |
| OR5AN1  | 11  |                    |          | 1                  | 7.57E-01 |                    |          | 1                  | 1.54E-02 |                    |          | 1                  | 1.60E-02 |
| ING1    | 13  | 2                  | 1.33E-02 | 2                  | 1.33E-02 | 1                  | 1.55E-02 | 1                  | 1.55E-02 | 2                  | 3.89E-01 | 2                  | 3.89E-01 |
| ITGB8   | 7   |                    |          |                    |          | 1                  | 1.55E-02 | 1                  | 1.55E-02 | 1                  | 2.66E-02 | 1                  | 2.66E-02 |
| KATNAL2 | 18  | 1                  | 8.94E-02 | 1                  | 8.94E-02 | 1                  | 1.55E-02 | 1                  | 1.55E-02 | 2                  | 1.30E-01 | 2                  | 1.30E-01 |
| NOL4    | 18  | 1                  | 8.07E-02 | 1                  | 8.07E-02 | 1                  | 1.55E-02 | 1                  | 1.55E-02 | 2                  | 1.32E-01 | 2                  | 1.32E-01 |
| P2RX7   | 12  |                    |          |                    |          | 1                  | 1.55E-02 | 1                  | 1.55E-02 | 1                  | 2.66E-02 | 1                  | 2.66E-02 |
| ZCCHC14 | 16  |                    |          | 1                  | 5.73E-01 | 1                  | 1.55E-02 | 2                  | 1.56E-02 | 1                  | 2.66E-02 | 2                  | 2.67E-02 |
| ESPN    | 1   | 1                  | 9.12E-01 | 1                  | 9.12E-01 | 1                  | 1.55E-02 | 1                  | 1.55E-02 | 1                  | 2.57E-02 | 1                  | 2.57E-02 |
| OR7A17  | 19  | 2                  | 8.47E-01 | 2                  | 8.47E-01 | 3                  | 2.45E-02 | 3                  | 2.45E-02 | 2                  | 1.55E-02 | 2                  | 1.55E-02 |
| C3orf18 | 3   | 1                  | 7.39E-01 | 2                  | 1.00E+00 | 1                  | 4.33E-01 | 2                  | 2.94E-01 |                    |          | 1                  | 1.57E-02 |
| ARID1B  | 6   | 1                  | 7.20E-02 | 1                  | 7.20E-02 | 1                  | 1.58E-02 | 1                  | 1.58E-02 | 2                  | 1.45E-01 | 2                  | 1.45E-01 |
| DALRD3  | 3   |                    |          |                    |          | 1                  | 1.58E-02 | 1                  | 1.58E-02 | 1                  | 2.90E-02 | 1                  | 2.90E-02 |
| GPBAR1  | 2   | 1                  | 7.82E-02 | 1                  | 7.82E-02 | 1                  | 1.58E-02 | 1                  | 1.58E-02 | 2                  | 1.46E-01 | 2                  | 1.46E-01 |
| OARD1   | 6   | 1                  | 7.17E-02 | 1                  | 7.17E-02 | 1                  | 1.58E-02 | 1                  | 1.58E-02 | 2                  | 1.46E-01 | 2                  | 1.46E-01 |
| ZNF79   | 9   | 1                  | 7.53E-02 | 1                  | 7.53E-02 | 1                  | 1.58E-02 | 1                  | 1.58E-02 | 2                  | 1.48E-01 | 2                  | 1.48E-01 |
| A1BG    | 19  | 3                  | 7.25E-01 | 3                  | 7.25E-01 | 2                  | 2.95E-02 | 2                  | 2.95E-02 | 2                  | 1.59E-02 | 2                  | 1.59E-02 |
| SLC30A3 | 2   | 2                  | 1.53E-02 | 2                  | 1.53E-02 | 1                  | 1.59E-02 | 1                  | 1.59E-02 | 2                  | 4.19E-01 | 2                  | 4.19E-01 |
| ACTN4   | 19  | 1                  | 7.81E-02 | 1                  | 7.81E-02 | 1                  | 1.59E-02 | 1                  | 1.59E-02 | 2                  | 1.89E-01 | 2                  | 1.89E-01 |
| LGALS1  | 22  | 1                  | 8.30E-02 | 1                  | 8.30E-02 | 1                  | 1.59E-02 | 1                  | 1.59E-02 | 1                  | 1.99E-01 | 1                  | 1.99E-01 |
| NPTN    | 15  | 1                  | 6.77E-02 | 1                  | 6.77E-02 | 1                  | 1.59E-02 | 1                  | 1.59E-02 | 2                  | 1.83E-01 | 2                  | 1.83E-01 |
| OR5I1   | 11  |                    |          | 2                  | 1.66E-01 | 1                  | 1.59E-02 | 3                  | 2.43E-01 | 1                  | 2.71E-02 | 3                  | 4.05E-01 |
| TXNDC9  | 2   |                    |          |                    |          | 1                  | 1.59E-02 | 1                  | 1.59E-02 | 1                  | 2.71E-02 | 1                  | 2.71E-02 |
| ZFP82   | 19  | 1                  | 8.07E-02 | 1                  | 8.07E-02 | 1                  | 1.59E-02 | 1                  | 1.59E-02 | 2                  | 1.87E-01 | 2                  | 1.87E-01 |
| ATP5G2  | 12  |                    |          |                    |          | 1                  | 1.61E-02 | 1                  | 1.61E-02 | 1                  | 2.94E-02 | 1                  | 2.94E-02 |
| D2HGDH  | 2   | 1                  | 5.93E-02 | 1                  | 5.93E-02 | 1                  | 1.61E-02 | 1                  | 1.61E-02 | 2                  | 1.50E-01 | 2                  | 1.50E-01 |
| AIPL1   | 17  |                    |          |                    |          | 1                  | 1.61E-02 | 1                  | 1.61E-02 | 1                  | 2.94E-02 | 1                  | 2.94E-02 |
| OR14C36 | 1   |                    |          | 1                  | 7.12E-01 | 1                  | 1.61E-02 | 2                  | 1.61E-02 | 1                  | 2.96E-02 | 2                  | 2.96E-02 |
| AADAT   | 4   |                    |          |                    |          | 1                  | 1.61E-02 | 1                  | 1.61E-02 | 1                  | 2.96E-02 | 1                  | 2.96E-02 |
| DNTTIP2 | 1   |                    |          |                    |          | 1                  | 1.61E-02 | 1                  | 1.61E-02 | 1                  | 2.96E-02 | 1                  | 2.96E-02 |
| MRPL36  | 5   |                    |          |                    |          | 1                  | 1.61E-02 | 1                  | 1.61E-02 | 1                  | 2.96E-02 | 1                  | 2.96E-02 |
| RBMXL2  | 11  |                    |          |                    |          | 1                  | 1.61E-02 | 1                  | 1.61E-02 | 1                  | 2.96E-02 | 1                  | 2.96E-02 |
| VGLL4   | 3   | 1                  | 7.80E-02 | 1                  | 7.80E-02 | 1                  | 1.61E-02 | 1                  | 1.61E-02 | 2                  | 1.66E-01 | 2                  | 1.66E-01 |

| SetID        | Chr | ADEH- vs NA        |          |                    |          | ADEH+ vs ADEH-     |          |                    |          | ADEH+ vs NA        |          |                    |          |
|--------------|-----|--------------------|----------|--------------------|----------|--------------------|----------|--------------------|----------|--------------------|----------|--------------------|----------|
|              |     | rare novel         |          | all                |          | rare novel         |          | all                |          | rare novel         |          | all                |          |
|              |     | N variants in test | p-value  | N variants in test | p-value  | N variants in test | p-value  | N variants in test | p-value  | N variants in test | p-value  | N variants in test | p-value  |
| ZBED4        | 22  | 1                  | 5.93E-02 | 1                  | 5.93E-02 | 1                  | 1.61E-02 | 1                  | 1.61E-02 | 2                  | 1.58E-01 | 2                  | 1.58E-01 |
| OR5K2        | 3   |                    |          | 1                  | 2.08E-01 |                    |          | 1                  | 5.71E-02 |                    |          | 1                  | 1.62E-02 |
| C11orf88     | 11  |                    |          |                    |          | 1                  | 1.62E-02 | 1                  | 1.62E-02 | 1                  | 2.91E-02 | 1                  | 2.91E-02 |
| CLDN9        | 16  |                    |          |                    |          | 1                  | 1.62E-02 | 1                  | 1.62E-02 | 1                  | 2.91E-02 | 1                  | 2.91E-02 |
| FERMT2       | 14  |                    |          |                    |          | 1                  | 1.62E-02 | 1                  | 1.62E-02 | 1                  | 2.91E-02 | 1                  | 2.91E-02 |
| PRR5L        | 11  |                    |          |                    |          | 1                  | 1.62E-02 | 1                  | 1.62E-02 | 1                  | 2.91E-02 | 1                  | 2.91E-02 |
| ZNF304       | 19  | 1                  | 8.32E-02 | 1                  | 8.32E-02 | 1                  | 1.62E-02 | 1                  | 1.62E-02 | 2                  | 1.81E-01 | 2                  | 1.81E-01 |
| CLUH         | 17  | 1                  | 6.01E-02 | 1                  | 6.01E-02 | 1                  | 1.66E-02 | 1                  | 1.66E-02 | 2                  | 1.75E-01 | 2                  | 1.75E-01 |
| FAM193B      | 5   |                    |          |                    |          | 1                  | 1.66E-02 | 1                  | 1.66E-02 | 1                  | 2.95E-02 | 1                  | 2.95E-02 |
| PATE4        | 11  |                    |          |                    |          | 1                  | 1.66E-02 | 1                  | 1.66E-02 | 1                  | 2.95E-02 | 1                  | 2.95E-02 |
| PRKD2        | 19  |                    |          |                    |          | 1                  | 1.66E-02 | 1                  | 1.66E-02 | 1                  | 2.95E-02 | 1                  | 2.95E-02 |
| TBC1D10C     | 11  | 1                  | 6.93E-02 | 1                  | 6.93E-02 | 1                  | 1.66E-02 | 1                  | 1.66E-02 | 1                  | 1.88E-01 | 1                  | 1.88E-01 |
| TEAD2        | 19  | 1                  | 7.40E-02 | 1                  | 7.40E-02 | 1                  | 1.66E-02 | 1                  | 1.66E-02 | 2                  | 1.76E-01 | 2                  | 1.76E-01 |
| TMEM168      | 7   |                    |          |                    |          | 1                  | 1.66E-02 | 1                  | 1.66E-02 | 1                  | 2.95E-02 | 1                  | 2.95E-02 |
| MYLK2        | 20  | 1                  | 3.49E-01 | 1                  | 3.49E-01 | 1                  | 1.66E-02 | 1                  | 1.66E-02 | 1                  | 9.14E-02 | 1                  | 9.14E-02 |
| CSNK1E       | 22  |                    |          |                    |          | 1                  | 1.67E-02 | 1                  | 1.67E-02 | 1                  | 3.14E-02 | 1                  | 3.14E-02 |
| CWF19L1      | 10  |                    |          |                    |          | 1                  | 1.67E-02 | 1                  | 1.67E-02 | 1                  | 3.14E-02 | 1                  | 3.14E-02 |
| DDX25        | 11  | 1                  | 6.94E-02 | 1                  | 6.94E-02 | 1                  | 1.67E-02 | 1                  | 1.67E-02 | 2                  | 1.74E-01 | 2                  | 1.74E-01 |
| LOC400927-CS | 22  |                    |          |                    |          | 1                  | 1.67E-02 | 1                  | 1.67E-02 | 1                  | 3.14E-02 | 1                  | 3.14E-02 |
| OR5D16       | 11  |                    |          | 1                  | 4.81E-01 | 1                  | 1.67E-02 | 2                  | 4.55E-02 | 1                  | 3.14E-02 | 2                  | 8.70E-02 |
| KIAA2012     | 2   | 3                  | 2.50E-01 | 4                  | 1.70E-01 | 2                  | 2.49E-02 | 3                  | 1.67E-02 | 2                  | 1.61E-01 | 3                  | 1.55E-01 |
| LAMA1        | 18  | 16                 | 5.96E-03 | 16                 | 5.96E-03 | 16                 | 2.92E-01 | 16                 | 2.92E-01 | 8                  | 1.67E-02 | 8                  | 1.67E-02 |
| LSR          | 19  | 4                  | 2.13E-01 | 4                  | 2.13E-01 | 2                  | 1.99E-02 | 2                  | 1.99E-02 | 4                  | 1.68E-02 | 4                  | 1.68E-02 |
| KIAA0430     | 16  | 7                  | 5.39E-01 | 7                  | 5.39E-01 | 5                  | 3.22E-02 | 5                  | 3.22E-02 | 5                  | 1.68E-02 | 5                  | 1.68E-02 |
| PMF1         | 1   | 3                  | 6.06E-01 | 3                  | 6.06E-01 | 2                  | 6.63E-02 | 2                  | 6.63E-02 | 3                  | 1.68E-02 | 3                  | 1.68E-02 |
| PMF1-BGLAP   | 1   | 3                  | 6.06E-01 | 3                  | 6.06E-01 | 2                  | 6.63E-02 | 2                  | 6.63E-02 | 3                  | 1.68E-02 | 3                  | 1.68E-02 |
| USP20        | 9   | 3                  | 3.13E-01 | 3                  | 3.13E-01 | 4                  | 8.88E-02 | 4                  | 8.88E-02 | 3                  | 1.70E-02 | 3                  | 1.70E-02 |
| KCNIP2       | 10  | 1                  | 6.33E-03 | 1                  | 6.33E-03 | 1                  | 1.71E-02 | 1                  | 1.71E-02 | 1                  | 1.00E+00 | 1                  | 1.00E+00 |
| CSPG5        | 3   |                    |          |                    |          | 1                  | 1.71E-02 | 1                  | 1.71E-02 | 1                  | 3.07E-02 | 1                  | 3.07E-02 |
| ECD          | 10  |                    |          | 1                  | 1.53E-01 | 1                  | 1.71E-02 | 2                  | 5.90E-02 | 1                  | 3.07E-02 | 2                  | 3.19E-01 |
| ELANE        | 19  |                    |          |                    |          | 1                  | 1.71E-02 | 1                  | 1.71E-02 | 1                  | 3.07E-02 | 1                  | 3.07E-02 |
| GALNT13      | 2   | 1                  | 7.20E-02 | 1                  | 7.20E-02 | 1                  | 1.71E-02 | 1                  | 1.71E-02 | 2                  | 1.62E-01 | 2                  | 1.62E-01 |
| MRPL1        | 4   |                    |          |                    |          | 1                  | 1.71E-02 | 1                  | 1.71E-02 | 1                  | 3.07E-02 | 1                  | 3.07E-02 |
| RAPH1        | 2   | 1                  | 7.75E-02 | 1                  | 7.75E-02 | 1                  | 1.71E-02 | 1                  | 1.71E-02 | 1                  | 1.78E-01 | 1                  | 1.78E-01 |
| RPL4         | 15  |                    |          |                    |          | 1                  | 1.71E-02 | 1                  | 1.71E-02 | 1                  | 3.07E-02 | 1                  | 3.07E-02 |
| SERPINF2     | 17  |                    |          |                    |          | 1                  | 1.71E-02 | 1                  | 1.71E-02 | 1                  | 3.07E-02 | 1                  | 3.07E-02 |
| ADAM18       | 8   | 4                  | 1.02E-01 | 4                  | 1.02E-01 | 4                  | 6.01E-02 | 4                  | 6.01E-02 | 1                  | 1.71E-02 | 1                  | 1.71E-02 |
| OSMR         | 5   | 6                  | 8.80E-01 | 6                  | 8.80E-01 | 3                  | 3.34E-01 | 3                  | 3.34E-01 | 4                  | 1.72E-02 | 4                  | 1.72E-02 |
| ACACA        | 17  |                    |          |                    |          | 1                  | 1.73E-02 | 1                  | 1.73E-02 | 1                  | 3.10E-02 | 1                  | 3.10E-02 |
| CDH26        | 20  |                    |          |                    |          | 1                  | 1.73E-02 | 1                  | 1.73E-02 | 1                  | 3.10E-02 | 1                  | 3.10E-02 |
| DMBX1        | 1   |                    |          |                    |          | 1                  | 1.73E-02 | 1                  | 1.73E-02 | 1                  | 3.10E-02 | 1                  | 3.10E-02 |
| PDE6D        | 2   | 1                  | 6.93E-02 | 1                  | 6.93E-02 | 1                  | 1.73E-02 | 1                  | 1.73E-02 | 2                  | 1.65E-01 | 2                  | 1.65E-01 |
| POLR2G       | 11  |                    |          |                    |          | 1                  | 1.73E-02 | 1                  | 1.73E-02 | 1                  | 3.10E-02 | 1                  | 3.10E-02 |
| PPP1R35      | 7   | 1                  | 6.68E-02 | 1                  | 6.68E-02 | 1                  | 1.73E-02 | 1                  | 1.73E-02 | 2                  | 1.60E-01 | 2                  | 1.60E-01 |
| WAPL         | 10  | 1                  | 1.15E-01 | 1                  | 1.15E-01 | 1                  | 1.73E-02 | 1                  | 1.73E-02 | 2                  | 1.55E-01 | 2                  | 1.55E-01 |
| SLC9A3R1     | 17  | 3                  | 3.26E-01 | 3                  | 3.26E-01 | 3                  | 1.74E-02 | 3                  | 1.74E-02 | 1                  | 2.98E-02 | 1                  | 2.98E-02 |
| BRD8         | 5   | 2                  | 9.49E-03 | 3                  | 9.59E-03 | 1                  | 1.77E-02 | 2                  | 1.80E-02 | 3                  | 3.30E-01 | 4                  | 3.27E-01 |
| ATF7IP       | 12  | 2                  | 1.74E-02 | 2                  | 1.74E-02 | 1                  | 1.77E-02 | 1                  | 1.77E-02 | 3                  | 3.66E-01 | 3                  | 3.66E-01 |



| SetID        | Chr | ADEH- vs NA        |          |                    |          | ADEH+ vs ADEH-     |          |                    |          | ADEH+ vs NA        |          |                    |          |
|--------------|-----|--------------------|----------|--------------------|----------|--------------------|----------|--------------------|----------|--------------------|----------|--------------------|----------|
|              |     | rarenovel          |          | all                |          | rarenovel          |          | all                |          | rarenovel          |          | all                |          |
|              |     | N variants in test | p-value  | N variants in test | p-value  | N variants in test | p-value  | N variants in test | p-value  | N variants in test | p-value  | N variants in test | p-value  |
| STX19        | 3   | 1                  | 8.08E-02 | 1                  | 8.08E-02 | 1                  | 1.77E-02 | 1                  | 1.77E-02 | 2                  | 1.75E-01 | 2                  | 1.75E-01 |
| CTNNBL1      | 20  | 1                  | 8.19E-02 | 1                  | 8.19E-02 | 1                  | 1.77E-02 | 1                  | 1.77E-02 | 2                  | 1.74E-01 | 2                  | 1.74E-01 |
| DYNLRB1      | 20  |                    |          |                    |          | 1                  | 1.77E-02 | 1                  | 1.77E-02 | 1                  | 2.77E-02 | 1                  | 2.77E-02 |
| FGA          | 4   |                    |          |                    |          | 1                  | 1.77E-02 | 1                  | 1.77E-02 | 1                  | 2.77E-02 | 1                  | 2.77E-02 |
| NDUFA8       | 9   |                    |          |                    |          | 1                  | 1.77E-02 | 1                  | 1.77E-02 | 1                  | 2.77E-02 | 1                  | 2.77E-02 |
| TRPC1        | 3   |                    |          |                    |          | 1                  | 1.77E-02 | 1                  | 1.77E-02 | 1                  | 2.77E-02 | 1                  | 2.77E-02 |
| ANXA6        | 5   | 4                  | 4.84E-01 | 4                  | 4.84E-01 | 4                  | 7.45E-02 | 4                  | 7.45E-02 | 3                  | 1.78E-02 | 3                  | 1.78E-02 |
| ZNF841       | 19  | 2                  | 9.81E-03 | 2                  | 9.81E-03 | 1                  | 1.80E-02 | 1                  | 1.80E-02 | 3                  | 2.04E-01 | 3                  | 2.04E-01 |
| BRF1         | 14  | 2                  | 1.77E-02 | 2                  | 1.77E-02 | 1                  | 1.80E-02 | 1                  | 1.80E-02 | 3                  | 3.56E-01 | 3                  | 3.56E-01 |
| CCDC115      | 2   |                    |          |                    |          | 1                  | 1.80E-02 | 1                  | 1.80E-02 | 1                  | 3.07E-02 | 1                  | 3.07E-02 |
| MFAP4        | 17  | 1                  | 1.95E-02 | 1                  | 1.95E-02 | 1                  | 1.80E-02 | 1                  | 1.80E-02 | 2                  | 2.06E-01 | 2                  | 2.06E-01 |
| WDR4         | 21  | 1                  | 8.67E-02 | 1                  | 8.67E-02 | 1                  | 1.80E-02 | 1                  | 1.80E-02 | 2                  | 1.67E-01 | 2                  | 1.67E-01 |
| C1orf53      | 1   | 1                  | 6.43E-02 | 1                  | 6.43E-02 | 1                  | 1.82E-02 | 1                  | 1.82E-02 | 1                  | 2.70E-01 | 1                  | 2.70E-01 |
| LCN12        | 9   |                    |          |                    |          | 1                  | 1.82E-02 | 1                  | 1.82E-02 | 1                  | 2.77E-02 | 1                  | 2.77E-02 |
| PDYN         | 20  | 1                  | 5.93E-02 | 1                  | 5.93E-02 | 1                  | 1.82E-02 | 1                  | 1.82E-02 | 2                  | 1.61E-01 | 2                  | 1.61E-01 |
| VSTM4        | 10  | 2                  | 1.53E-02 | 2                  | 1.53E-02 | 1                  | 1.83E-02 | 1                  | 1.83E-02 | 2                  | 4.09E-01 | 2                  | 4.09E-01 |
| CFH          | 1   |                    |          |                    |          | 1                  | 1.83E-02 | 1                  | 1.83E-02 | 1                  | 3.20E-02 | 1                  | 3.20E-02 |
| ENTPD8       | 9   | 1                  | 7.42E-02 | 1                  | 7.42E-02 | 1                  | 1.83E-02 | 1                  | 1.83E-02 | 2                  | 1.87E-01 | 2                  | 1.87E-01 |
| PRSS36       | 16  |                    |          |                    |          | 1                  | 1.83E-02 | 1                  | 1.83E-02 | 1                  | 3.20E-02 | 1                  | 3.20E-02 |
| PSPH         | 7   |                    |          |                    |          | 1                  | 1.83E-02 | 1                  | 1.83E-02 | 1                  | 3.20E-02 | 1                  | 3.20E-02 |
| NKX2-8       | 14  |                    |          |                    |          | 1                  | 1.86E-02 | 1                  | 1.86E-02 | 1                  | 2.76E-02 | 1                  | 2.76E-02 |
| RNF121       | 11  | 1                  | 7.68E-02 | 1                  | 7.68E-02 | 1                  | 1.86E-02 | 1                  | 1.86E-02 | 1                  | 1.81E-01 | 1                  | 1.81E-01 |
| 12-Sep       | 16  | 1                  | 8.68E-02 | 1                  | 8.68E-02 | 1                  | 1.86E-02 | 1                  | 1.86E-02 | 2                  | 1.79E-01 | 2                  | 1.79E-01 |
| ARHGEF18     | 19  | 4                  | 7.72E-01 | 4                  | 7.72E-01 | 5                  | 1.86E-02 | 5                  | 1.86E-02 | 3                  | 2.05E-02 | 3                  | 2.05E-02 |
| PLG          | 6   | 5                  | 2.52E-01 | 5                  | 2.52E-01 | 5                  | 1.43E-01 | 5                  | 1.43E-01 | 3                  | 1.87E-02 | 3                  | 1.87E-02 |
| ZIM3         | 19  | 1                  | 2.85E-01 | 1                  | 2.85E-01 | 1                  | 1.87E-02 | 1                  | 1.87E-02 | 1                  | 1.01E-01 | 1                  | 1.01E-01 |
| FAM180A      | 7   | 2                  | 4.60E-01 | 2                  | 4.60E-01 | 2                  | 4.62E-02 | 2                  | 4.62E-02 | 1                  | 1.88E-02 | 1                  | 1.88E-02 |
| EMSY         | 11  | 6                  | 9.21E-02 | 6                  | 9.21E-02 | 7                  | 4.08E-01 | 7                  | 4.08E-01 | 1                  | 1.88E-02 | 1                  | 1.88E-02 |
| GPBP1        | 5   | 2                  | 5.77E-01 | 2                  | 5.77E-01 | 2                  | 1.06E-01 | 2                  | 1.06E-01 | 1                  | 1.88E-02 | 1                  | 1.88E-02 |
| LOC101929726 | 6   | 1                  | 3.93E-01 | 1                  | 3.93E-01 | 1                  | 7.26E-02 | 1                  | 7.26E-02 | 1                  | 1.88E-02 | 1                  | 1.88E-02 |
| PSD2         | 5   | 1                  | 3.98E-01 | 1                  | 3.98E-01 | 1                  | 6.58E-02 | 1                  | 6.58E-02 | 1                  | 1.88E-02 | 1                  | 1.88E-02 |
| WDR11        | 10  | 4                  | 9.70E-02 | 4                  | 9.70E-02 | 5                  | 2.75E-01 | 5                  | 2.75E-01 | 1                  | 1.88E-02 | 1                  | 1.88E-02 |
| ZNF227       | 19  | 2                  | 3.08E-01 | 2                  | 3.08E-01 | 3                  | 1.58E-01 | 3                  | 1.58E-01 | 1                  | 1.88E-02 | 1                  | 1.88E-02 |
| SIGIRR       | 11  | 1                  | 2.11E-01 | 1                  | 2.11E-01 | 2                  | 1.89E-02 | 2                  | 1.89E-02 | 2                  | 1.18E-01 | 2                  | 1.18E-01 |
| APOA5        | 11  | 1                  | 7.53E-01 | 2                  | 8.23E-01 | 2                  | 5.73E-02 | 3                  | 2.30E-02 | 1                  | 2.49E-02 | 2                  | 1.90E-02 |
| LIPA         | 10  |                    |          |                    |          | 1                  | 1.91E-02 | 1                  | 1.91E-02 | 1                  | 2.50E-02 | 1                  | 2.50E-02 |
| MBOAT7       | 19  |                    |          |                    |          | 1                  | 1.91E-02 | 1                  | 1.91E-02 | 1                  | 2.50E-02 | 1                  | 2.50E-02 |
| SF1          | 11  | 2                  | 1.81E-02 | 2                  | 1.81E-02 | 1                  | 1.91E-02 | 1                  | 1.91E-02 | 3                  | 4.23E-01 | 3                  | 4.23E-01 |
| DEFA5        | 8   |                    |          |                    |          | 1                  | 1.91E-02 | 1                  | 1.91E-02 | 1                  | 2.50E-02 | 1                  | 2.50E-02 |
| ELMOD2       | 4   |                    |          |                    |          | 1                  | 1.91E-02 | 1                  | 1.91E-02 | 1                  | 2.50E-02 | 1                  | 2.50E-02 |
| KIAA1211L    | 2   | 2                  | 2.08E-02 | 2                  | 2.08E-02 | 1                  | 1.91E-02 | 1                  | 1.91E-02 | 2                  | 4.44E-01 | 2                  | 4.44E-01 |
| ACTRT3       | 3   | 1                  | 5.36E-02 | 1                  | 5.36E-02 | 1                  | 1.91E-02 | 1                  | 1.91E-02 | 1                  | 2.20E-01 | 1                  | 2.20E-01 |
| MYOF         | 10  | 14                 | 3.37E-01 | 16                 | 4.26E-01 | 14                 | 1.62E-01 | 16                 | 4.79E-02 | 5                  | 3.81E-02 | 7                  | 1.92E-02 |
| THBS4        | 5   | 3                  | 8.26E-01 | 3                  | 8.26E-01 | 2                  | 1.97E-02 | 2                  | 1.97E-02 | 2                  | 3.67E-02 | 2                  | 3.67E-02 |
| DAP          | 5   | 1                  | 6.93E-02 | 2                  | 5.06E-01 |                    |          | 1                  | 1.99E-02 | 1                  | 6.53E-01 | 2                  | 9.71E-02 |
| NWD2         | 4   | 3                  | 7.08E-01 | 4                  | 7.08E-01 | 3                  | 2.19E-02 | 4                  | 2.19E-02 | 3                  | 2.01E-02 | 4                  | 2.01E-02 |
| PRKCQ        | 10  | 4                  | 7.95E-01 | 4                  | 7.95E-01 | 4                  | 3.67E-02 | 4                  | 3.67E-02 | 3                  | 2.01E-02 | 3                  | 2.01E-02 |
| CTAGE5       | 14  | 1                  | 7.61E-01 | 1                  | 7.61E-01 | 2                  | 5.92E-02 | 2                  | 5.92E-02 | 1                  | 2.02E-02 | 1                  | 2.02E-02 |

| SetID    | Chr | ADEH- vs NA        |          |                    |          | ADEH+ vs ADEH-     |          |                    |          | ADEH+ vs NA        |          |                    |          |
|----------|-----|--------------------|----------|--------------------|----------|--------------------|----------|--------------------|----------|--------------------|----------|--------------------|----------|
|          |     | rarenovel          |          | all                |          | rarenovel          |          | all                |          | rarenovel          |          | all                |          |
|          |     | N variants in test | p-value  | N variants in test | p-value  | N variants in test | p-value  | N variants in test | p-value  | N variants in test | p-value  | N variants in test | p-value  |
| ARHGAP20 | 11  | 3                  | 3.40E-01 | 3                  | 3.40E-01 | 3                  | 1.71E-01 | 3                  | 1.71E-01 | 1                  | 2.02E-02 | 1                  | 2.02E-02 |
| BTBD7    | 14  | 2                  | 1.03E-01 | 2                  | 1.03E-01 | 2                  | 6.26E-01 | 2                  | 6.26E-01 | 1                  | 2.02E-02 | 1                  | 2.02E-02 |
| GPN3     | 12  | 1                  | 7.52E-01 | 1                  | 7.52E-01 | 2                  | 5.96E-02 | 2                  | 5.96E-02 | 1                  | 2.02E-02 | 1                  | 2.02E-02 |
| MMP15    | 16  | 2                  | 5.71E-01 | 2                  | 5.71E-01 | 3                  | 1.14E-01 | 3                  | 1.14E-01 | 1                  | 2.02E-02 | 1                  | 2.02E-02 |
| MRPL2    | 6   | 2                  | 3.31E-01 | 2                  | 3.31E-01 | 2                  | 1.44E-01 | 2                  | 1.44E-01 | 1                  | 2.02E-02 | 1                  | 2.02E-02 |
| ZNF831   | 20  | 2                  | 1.29E-01 | 2                  | 1.29E-01 | 3                  | 1.79E-01 | 3                  | 1.79E-01 | 1                  | 2.02E-02 | 1                  | 2.02E-02 |
| SORBS2   | 4   | 4                  | 1.04E-03 | 4                  | 1.04E-03 | 1                  | 2.03E-02 | 1                  | 2.03E-02 | 4                  | 1.00E+00 | 4                  | 1.00E+00 |
| EGFL7    | 9   | 3                  | 5.38E-03 | 3                  | 5.38E-03 | 1                  | 2.03E-02 | 1                  | 2.03E-02 | 3                  | 5.47E-01 | 3                  | 5.47E-01 |
| MASP1    | 3   | 3                  | 6.46E-03 | 3                  | 6.46E-03 | 1                  | 2.03E-02 | 1                  | 2.03E-02 | 4                  | 3.66E-01 | 4                  | 3.66E-01 |
| C2orf78  | 2   | 2                  | 1.92E-02 | 2                  | 1.92E-02 | 1                  | 2.03E-02 | 1                  | 2.03E-02 | 3                  | 3.76E-01 | 3                  | 3.76E-01 |
| CREB3L4  | 1   |                    |          |                    |          | 1                  | 2.03E-02 | 1                  | 2.03E-02 | 1                  | 3.13E-02 | 1                  | 3.13E-02 |
| LARP7    | 4   |                    |          |                    |          | 1                  | 2.03E-02 | 1                  | 2.03E-02 | 1                  | 3.13E-02 | 1                  | 3.13E-02 |
| OVOL1    | 11  |                    |          |                    |          | 1                  | 2.03E-02 | 1                  | 2.03E-02 | 1                  | 3.13E-02 | 1                  | 3.13E-02 |
| SH2D4B   | 10  |                    |          |                    |          | 1                  | 2.03E-02 | 1                  | 2.03E-02 | 1                  | 3.13E-02 | 1                  | 3.13E-02 |
| TRAM1    | 8   |                    |          |                    |          | 1                  | 2.04E-02 | 1                  | 2.04E-02 | 1                  | 3.02E-02 | 1                  | 3.02E-02 |
| KLF15    | 3   |                    |          |                    |          | 1                  | 2.04E-02 | 1                  | 2.04E-02 | 1                  | 3.02E-02 | 1                  | 3.02E-02 |
| ZPR1     | 11  | 1                  | 4.53E-01 | 1                  | 4.53E-01 | 1                  | 2.04E-02 | 1                  | 2.04E-02 | 1                  | 9.09E-02 | 1                  | 9.09E-02 |
| CNDP1    | 18  | 2                  | 2.13E-03 | 2                  | 2.13E-03 | 1                  | 2.06E-02 | 1                  | 2.06E-02 | 3                  | 2.91E-01 | 3                  | 2.91E-01 |
| CEBPA    | 19  |                    |          |                    |          | 1                  | 2.06E-02 | 1                  | 2.06E-02 | 1                  | 2.66E-02 | 1                  | 2.66E-02 |
| SLC39A8  | 4   |                    |          |                    |          | 1                  | 2.06E-02 | 1                  | 2.06E-02 | 1                  | 2.66E-02 | 1                  | 2.66E-02 |
| TCFL5    | 20  | 1                  | 4.44E-01 | 1                  | 4.44E-01 | 2                  | 2.08E-02 | 2                  | 2.08E-02 | 2                  | 8.52E-02 | 2                  | 8.52E-02 |
| CCDC109B | 4   | 5                  | 4.55E-01 | 5                  | 4.55E-01 | 4                  | 2.09E-02 | 4                  | 2.09E-02 | 4                  | 3.54E-02 | 4                  | 3.54E-02 |
| MYRFL    | 12  | 1                  | 1.38E-01 | 1                  | 1.38E-01 | 1                  | 1.22E-01 | 1                  | 1.22E-01 | 1                  | 2.09E-02 | 1                  | 2.09E-02 |
| UCN      | 2   | 1                  | 2.18E-01 | 1                  | 2.18E-01 | 1                  | 1.08E-01 | 1                  | 1.08E-01 | 1                  | 2.09E-02 | 1                  | 2.09E-02 |
| CRTAP    | 3   | 6                  | 1.60E-01 | 6                  | 1.60E-01 | 6                  | 1.47E-01 | 6                  | 1.47E-01 | 2                  | 2.09E-02 | 2                  | 2.09E-02 |
| GAL3ST1  | 22  | 2                  | 1.89E-02 | 2                  | 1.89E-02 | 1                  | 2.11E-02 | 1                  | 2.11E-02 | 2                  | 5.00E-01 | 2                  | 5.00E-01 |
| BAALC    | 8   |                    |          |                    |          | 1                  | 2.11E-02 | 1                  | 2.11E-02 | 1                  | 2.80E-02 | 1                  | 2.80E-02 |
| KIF25    | 6   | 1                  | 7.13E-02 | 1                  | 7.13E-02 | 1                  | 2.11E-02 | 1                  | 2.11E-02 | 2                  | 2.26E-01 | 2                  | 2.26E-01 |
| NTPCR    | 1   |                    |          |                    |          | 1                  | 2.11E-02 | 1                  | 2.11E-02 | 1                  | 2.80E-02 | 1                  | 2.80E-02 |
| PLCG1    | 20  |                    |          |                    |          | 1                  | 2.11E-02 | 1                  | 2.11E-02 | 1                  | 2.80E-02 | 1                  | 2.80E-02 |
| TAF6L    | 11  |                    |          |                    |          | 1                  | 2.11E-02 | 1                  | 2.11E-02 | 1                  | 2.80E-02 | 1                  | 2.80E-02 |
| ZNF639   | 3   |                    |          |                    |          | 1                  | 2.11E-02 | 1                  | 2.11E-02 | 1                  | 2.80E-02 | 1                  | 2.80E-02 |
| UMODL1   | 21  | 7                  | 8.05E-01 | 8                  | 8.19E-01 | 6                  | 2.15E-02 | 7                  | 2.28E-02 | 5                  | 1.12E-01 | 6                  | 1.21E-01 |
| KRT12    | 17  | 3                  | 5.79E-01 | 3                  | 5.79E-01 | 5                  | 2.17E-02 | 5                  | 2.17E-02 | 4                  | 7.78E-02 | 4                  | 7.78E-02 |
| CCDC191  | 3   | 7                  | 5.11E-02 | 7                  | 5.11E-02 | 6                  | 5.18E-01 | 6                  | 5.18E-01 | 3                  | 2.20E-02 | 3                  | 2.20E-02 |
| ABHD4    | 14  | 1                  | 7.65E-01 | 1                  | 7.65E-01 | 2                  | 6.08E-02 | 2                  | 6.08E-02 | 1                  | 2.20E-02 | 1                  | 2.20E-02 |
| DRD1     | 5   | 1                  | 2.30E-01 | 1                  | 2.30E-01 | 1                  | 1.36E-01 | 1                  | 1.36E-01 | 1                  | 2.20E-02 | 1                  | 2.20E-02 |
| HHLA2    | 3   | 1                  | 4.03E-01 | 1                  | 4.03E-01 | 2                  | 1.07E-01 | 2                  | 1.07E-01 | 1                  | 2.20E-02 | 1                  | 2.20E-02 |
| JPH1     | 8   | 1                  | 4.06E-01 | 1                  | 4.06E-01 | 1                  | 8.70E-02 | 1                  | 8.70E-02 | 1                  | 2.20E-02 | 1                  | 2.20E-02 |
| KDEL2    | 7   | 1                  | 7.55E-01 | 1                  | 7.55E-01 | 2                  | 6.05E-02 | 2                  | 6.05E-02 | 1                  | 2.20E-02 | 1                  | 2.20E-02 |
| KDM4C    | 9   | 1                  | 7.48E-01 | 1                  | 7.48E-01 | 2                  | 5.86E-02 | 2                  | 5.86E-02 | 1                  | 2.20E-02 | 1                  | 2.20E-02 |
| NAP1L4   | 11  | 1                  | 7.41E-01 | 1                  | 7.41E-01 | 1                  | 4.03E-02 | 1                  | 4.03E-02 | 1                  | 2.20E-02 | 1                  | 2.20E-02 |
| SLCO4C1  | 5   | 2                  | 5.58E-01 | 2                  | 5.58E-01 | 3                  | 1.11E-01 | 3                  | 1.11E-01 | 1                  | 2.20E-02 | 1                  | 2.20E-02 |
| WDR83    | 19  | 1                  | 7.36E-01 | 1                  | 7.36E-01 | 2                  | 5.46E-02 | 2                  | 5.46E-02 | 1                  | 2.20E-02 | 1                  | 2.20E-02 |
| APPL1    | 3   | 1                  | 7.39E-01 | 1                  | 7.39E-01 | 2                  | 6.02E-02 | 2                  | 6.02E-02 | 1                  | 2.21E-02 | 1                  | 2.21E-02 |
| ABAT     | 16  | 2                  | 5.80E-01 | 2                  | 5.80E-01 | 3                  | 1.17E-01 | 3                  | 1.17E-01 | 1                  | 2.21E-02 | 1                  | 2.21E-02 |
| ATP2B2   | 3   | 4                  | 2.19E-01 | 4                  | 2.19E-01 | 5                  | 2.79E-01 | 5                  | 2.79E-01 | 1                  | 2.21E-02 | 1                  | 2.21E-02 |
| LCN8     | 9   | 1                  | 7.43E-01 | 1                  | 7.43E-01 | 2                  | 5.79E-02 | 2                  | 5.79E-02 | 1                  | 2.21E-02 | 1                  | 2.21E-02 |

| SetID   | Chr | ADEH- vs NA        |          |                    |          | ADEH+ vs ADEH-     |          |                    |          | ADEH+ vs NA        |          |                    |          |
|---------|-----|--------------------|----------|--------------------|----------|--------------------|----------|--------------------|----------|--------------------|----------|--------------------|----------|
|         |     | rarenovel          |          | all                |          | rarenovel          |          | all                |          | rarenovel          |          | all                |          |
|         |     | N variants in test | p-value  | N variants in test | p-value  | N variants in test | p-value  | N variants in test | p-value  | N variants in test | p-value  | N variants in test | p-value  |
| MEGF6   | 1   | 6                  | 8.77E-02 | 7                  | 1.33E-01 | 6                  | 4.32E-01 | 7                  | 2.90E-01 | 1                  | 2.21E-02 | 2                  | 9.73E-02 |
| MMP14   | 14  | 1                  | 7.34E-01 | 1                  | 7.34E-01 | 2                  | 5.45E-02 | 2                  | 5.45E-02 | 1                  | 2.21E-02 | 1                  | 2.21E-02 |
| NT5C3B  | 17  | 3                  | 8.76E-02 | 4                  | 8.80E-02 | 3                  | 3.97E-01 | 4                  | 3.97E-01 | 1                  | 2.27E-02 | 2                  | 2.23E-02 |
| TMCO2   | 1   | 1                  | 1.41E-01 | 1                  | 1.41E-01 | 1                  | 2.24E-02 | 1                  | 2.24E-02 | 1                  | 1.83E-01 | 1                  | 1.83E-01 |
| TNFRSF4 | 1   | 1                  | 4.36E-01 | 1                  | 4.36E-01 | 1                  | 5.82E-02 | 1                  | 5.82E-02 | 1                  | 2.26E-02 | 1                  | 2.26E-02 |
| C3      | 19  | 3                  | 1.45E-01 | 3                  | 1.45E-01 | 3                  | 4.17E-01 | 3                  | 4.17E-01 | 1                  | 2.27E-02 | 1                  | 2.27E-02 |
| ATR     | 3   | 2                  | 5.51E-01 | 2                  | 5.51E-01 | 3                  | 1.14E-01 | 3                  | 1.14E-01 | 1                  | 2.27E-02 | 1                  | 2.27E-02 |
| AK3     | 9   | 1                  | 7.38E-01 | 1                  | 7.38E-01 | 1                  | 4.67E-02 | 1                  | 4.67E-02 | 1                  | 2.27E-02 | 1                  | 2.27E-02 |
| ATP2B4  | 1   | 2                  | 2.93E-01 | 2                  | 2.93E-01 | 3                  | 1.49E-01 | 3                  | 1.49E-01 | 1                  | 2.27E-02 | 1                  | 2.27E-02 |
| DISP2   | 15  | 2                  | 5.79E-01 | 2                  | 5.79E-01 | 3                  | 1.13E-01 | 3                  | 1.13E-01 | 1                  | 2.27E-02 | 1                  | 2.27E-02 |
| EXTL1   | 1   | 3                  | 1.64E-01 | 3                  | 1.64E-01 | 4                  | 2.27E-01 | 4                  | 2.27E-01 | 1                  | 2.27E-02 | 1                  | 2.27E-02 |
| GCOM1   | 15  | 1                  | 6.81E-01 | 1                  | 6.81E-01 | 2                  | 5.08E-02 | 2                  | 5.08E-02 | 1                  | 2.27E-02 | 1                  | 2.27E-02 |
| MYZAP   | 15  | 1                  | 6.81E-01 | 1                  | 6.81E-01 | 2                  | 5.08E-02 | 2                  | 5.08E-02 | 1                  | 2.27E-02 | 1                  | 2.27E-02 |
| NAA50   | 3   | 1                  | 7.61E-01 | 1                  | 7.61E-01 | 2                  | 6.56E-02 | 2                  | 6.56E-02 | 1                  | 2.27E-02 | 1                  | 2.27E-02 |
| PLPP7   | 9   | 2                  | 8.53E-02 | 2                  | 8.53E-02 | 2                  | 6.37E-01 | 2                  | 6.37E-01 | 1                  | 2.27E-02 | 1                  | 2.27E-02 |
| RANBP2  | 2   | 1                  | 7.49E-01 | 1                  | 7.49E-01 | 2                  | 6.17E-02 | 2                  | 6.17E-02 | 1                  | 2.27E-02 | 1                  | 2.27E-02 |
| SCGN    | 6   | 1                  | 7.54E-01 | 1                  | 7.54E-01 | 2                  | 6.80E-02 | 2                  | 6.80E-02 | 1                  | 2.27E-02 | 1                  | 2.27E-02 |
| MYO5B   | 18  | 4                  | 2.06E-01 | 5                  | 3.53E-01 | 4                  | 1.00E-01 | 5                  | 1.01E-01 | 1                  | 2.30E-02 | 2                  | 2.36E-02 |
| TP53BP1 | 15  | 7                  | 9.37E-02 | 7                  | 9.37E-02 | 8                  | 2.11E-01 | 8                  | 2.11E-01 | 3                  | 2.30E-02 | 3                  | 2.30E-02 |
| PYGL    | 14  | 9                  | 3.31E-01 | 9                  | 3.31E-01 | 10                 | 1.24E-01 | 10                 | 1.24E-01 | 6                  | 2.31E-02 | 6                  | 2.31E-02 |
| SMPDL3A | 6   |                    |          | 1                  | 8.22E-01 |                    |          | 1                  | 2.57E-02 |                    |          | 1                  | 2.32E-02 |
| OR10H3  | 19  | 2                  | 5.43E-01 | 4                  | 5.28E-01 | 1                  | 2.35E-02 | 3                  | 5.11E-02 | 2                  | 1.40E-01 | 4                  | 1.80E-01 |
| HCN3    | 1   | 4                  | 1.52E-01 | 4                  | 1.52E-01 | 4                  | 3.28E-01 | 4                  | 3.28E-01 | 1                  | 2.35E-02 | 1                  | 2.35E-02 |
| MORC1   | 3   | 2                  | 5.53E-01 | 2                  | 5.53E-01 | 2                  | 1.25E-01 | 2                  | 1.25E-01 | 1                  | 2.35E-02 | 1                  | 2.35E-02 |
| MYO1G   | 7   | 4                  | 2.28E-01 | 4                  | 2.28E-01 | 5                  | 2.50E-01 | 5                  | 2.50E-01 | 1                  | 2.35E-02 | 1                  | 2.35E-02 |
| PAPD4   | 5   | 1                  | 7.63E-01 | 1                  | 7.63E-01 | 2                  | 6.15E-02 | 2                  | 6.15E-02 | 1                  | 2.35E-02 | 1                  | 2.35E-02 |
| TYMP    | 22  | 2                  | 5.57E-01 | 2                  | 5.57E-01 | 3                  | 1.22E-01 | 3                  | 1.22E-01 | 1                  | 2.35E-02 | 1                  | 2.35E-02 |
| ZNF484  | 9   | 1                  | 7.45E-01 | 1                  | 7.45E-01 | 1                  | 5.37E-02 | 1                  | 5.37E-02 | 1                  | 2.35E-02 | 1                  | 2.35E-02 |
| BCL6    | 3   | 1                  | 7.55E-01 | 1                  | 7.55E-01 | 2                  | 6.26E-02 | 2                  | 6.26E-02 | 1                  | 2.36E-02 | 1                  | 2.36E-02 |
| DISP1   | 1   | 3                  | 3.36E-01 | 3                  | 3.36E-01 | 4                  | 1.88E-01 | 4                  | 1.88E-01 | 1                  | 2.36E-02 | 1                  | 2.36E-02 |
| FAM3B   | 21  | 1                  | 4.13E-01 | 1                  | 4.13E-01 | 1                  | 7.78E-02 | 1                  | 7.78E-02 | 1                  | 2.36E-02 | 1                  | 2.36E-02 |
| ODF1    | 8   | 2                  | 5.72E-01 | 2                  | 5.72E-01 | 3                  | 1.15E-01 | 3                  | 1.15E-01 | 1                  | 2.36E-02 | 1                  | 2.36E-02 |
| RNF20   | 9   | 1                  | 7.61E-01 | 1                  | 7.61E-01 | 2                  | 6.07E-02 | 2                  | 6.07E-02 | 1                  | 2.36E-02 | 1                  | 2.36E-02 |
| CFAP53  | 18  | 4                  | 6.33E-01 | 4                  | 6.33E-01 | 4                  | 3.58E-02 | 4                  | 3.58E-02 | 3                  | 2.37E-02 | 3                  | 2.37E-02 |
| ACSM4   | 12  | 4                  | 8.53E-01 | 5                  | 5.30E-01 | 3                  | 7.86E-01 | 4                  | 6.15E-02 | 2                  | 6.19E-01 | 3                  | 2.38E-02 |
| FHOD3   | 18  | 7                  | 5.35E-01 | 7                  | 5.35E-01 | 5                  | 2.39E-02 | 5                  | 2.39E-02 | 5                  | 1.75E-01 | 5                  | 1.75E-01 |
| ANGPTL7 | 1   | 1                  | 2.84E-02 | 1                  | 2.84E-02 | 1                  | 1.00E+00 | 1                  | 1.00E+00 | 1                  | 2.39E-02 | 1                  | 2.39E-02 |
| CEACAM1 | 19  | 1                  | 7.49E-01 | 1                  | 7.49E-01 | 2                  | 5.83E-02 | 2                  | 5.83E-02 | 1                  | 2.39E-02 | 1                  | 2.39E-02 |
| DUSP5   | 10  | 2                  | 1.34E-01 | 2                  | 1.34E-01 | 2                  | 3.43E-01 | 2                  | 3.43E-01 | 1                  | 2.39E-02 | 1                  | 2.39E-02 |
| FAM83F  | 22  | 1                  | 7.49E-01 | 1                  | 7.49E-01 | 1                  | 5.17E-02 | 1                  | 5.17E-02 | 1                  | 2.39E-02 | 1                  | 2.39E-02 |
| SMC4    | 3   | 1                  | 7.54E-01 | 1                  | 7.54E-01 | 2                  | 6.16E-02 | 2                  | 6.16E-02 | 1                  | 2.39E-02 | 1                  | 2.39E-02 |
| TXK     | 4   | 1                  | 7.45E-01 | 1                  | 7.45E-01 | 2                  | 5.86E-02 | 2                  | 5.86E-02 | 1                  | 2.39E-02 | 1                  | 2.39E-02 |
| CHP2    | 16  | 1                  | 7.23E-02 | 1                  | 7.23E-02 | 1                  | 2.39E-02 | 1                  | 2.39E-02 | 1                  | 2.87E-01 | 1                  | 2.87E-01 |
| DNHD1   | 11  | 18                 | 7.75E-01 | 18                 | 7.75E-01 | 13                 | 9.15E-02 | 13                 | 9.15E-02 | 9                  | 2.42E-02 | 9                  | 2.42E-02 |
| OR2T4   | 1   | 1                  | 7.61E-01 | 2                  | 8.18E-01 | 2                  | 7.35E-02 | 3                  | 7.30E-02 | 1                  | 2.76E-02 | 2                  | 2.42E-02 |
| ACTR6   | 12  | 3                  | 3.33E-01 | 3                  | 3.33E-01 | 4                  | 1.80E-01 | 4                  | 1.80E-01 | 1                  | 2.46E-02 | 1                  | 2.46E-02 |
| ATF3    | 1   | 1                  | 7.45E-01 | 1                  | 7.45E-01 | 2                  | 6.21E-02 | 2                  | 6.21E-02 | 1                  | 2.46E-02 | 1                  | 2.46E-02 |
| C2orf80 | 2   | 2                  | 5.77E-01 | 2                  | 5.77E-01 | 2                  | 1.49E-01 | 2                  | 1.49E-01 | 1                  | 2.46E-02 | 1                  | 2.46E-02 |

| SetID    | Chr | ADEH- vs NA        |          |                    |          | ADEH+ vs ADEH-     |          |                    |          | ADEH+ vs NA        |          |                    |          |
|----------|-----|--------------------|----------|--------------------|----------|--------------------|----------|--------------------|----------|--------------------|----------|--------------------|----------|
|          |     | rarenovel          |          | all                |          | rarenovel          |          | all                |          | rarenovel          |          | all                |          |
|          |     | N variants in test | p-value  | N variants in test | p-value  | N variants in test | p-value  | N variants in test | p-value  | N variants in test | p-value  | N variants in test | p-value  |
| GRIK2    | 6   | 2                  | 2.96E-01 | 2                  | 2.96E-01 | 3                  | 1.58E-01 | 3                  | 1.58E-01 | 1                  | 2.46E-02 | 1                  | 2.46E-02 |
| PBRM1    | 3   | 2                  | 5.80E-01 | 2                  | 5.80E-01 | 3                  | 1.16E-01 | 3                  | 1.16E-01 | 1                  | 2.46E-02 | 1                  | 2.46E-02 |
| PCDHB12  | 5   | 2                  | 5.76E-01 | 2                  | 5.76E-01 | 3                  | 1.16E-01 | 3                  | 1.16E-01 | 1                  | 2.46E-02 | 1                  | 2.46E-02 |
| STAT2    | 12  | 3                  | 3.35E-01 | 3                  | 3.35E-01 | 3                  | 2.19E-01 | 3                  | 2.19E-01 | 1                  | 2.46E-02 | 1                  | 2.46E-02 |
| FBXO40   | 3   | 6                  | 4.44E-01 | 6                  | 4.44E-01 | 6                  | 1.46E-01 | 6                  | 1.46E-01 | 3                  | 2.47E-02 | 3                  | 2.47E-02 |
| SDAD1    | 4   | 4                  | 3.70E-01 | 4                  | 3.70E-01 | 5                  | 2.49E-02 | 5                  | 2.49E-02 | 2                  | 2.61E-02 | 2                  | 2.61E-02 |
| ADAP1    | 7   | 3                  | 1.08E-01 | 3                  | 1.08E-01 | 3                  | 2.42E-01 | 3                  | 2.42E-01 | 1                  | 2.49E-02 | 1                  | 2.49E-02 |
| BBS2     | 16  | 2                  | 5.85E-01 | 2                  | 5.85E-01 | 3                  | 1.10E-01 | 3                  | 1.10E-01 | 1                  | 2.49E-02 | 1                  | 2.49E-02 |
| PDE1B    | 12  | 1                  | 7.56E-01 | 1                  | 7.56E-01 | 2                  | 6.14E-02 | 2                  | 6.14E-02 | 1                  | 2.49E-02 | 1                  | 2.49E-02 |
| PTPMT1   | 11  | 2                  | 7.49E-02 | 3                  | 1.73E-01 | 2                  | 1.00E+00 | 3                  | 7.01E-01 | 1                  | 2.49E-02 | 2                  | 1.12E-01 |
| TMEM80   | 11  | 1                  | 2.27E-01 | 1                  | 2.27E-01 | 2                  | 1.11E-01 | 2                  | 1.11E-01 | 1                  | 2.49E-02 | 1                  | 2.49E-02 |
| UBR2     | 6   | 2                  | 5.59E-01 | 2                  | 5.59E-01 | 3                  | 1.08E-01 | 3                  | 1.08E-01 | 1                  | 2.49E-02 | 1                  | 2.49E-02 |
| PLCD1    | 3   | 4                  | 5.37E-01 | 4                  | 5.37E-01 | 5                  | 2.50E-02 | 5                  | 2.50E-02 | 6                  | 4.50E-02 | 6                  | 4.50E-02 |
| CD226    | 18  | 1                  | 7.53E-01 | 1                  | 7.53E-01 | 2                  | 8.50E-02 | 2                  | 8.50E-02 | 1                  | 2.50E-02 | 1                  | 2.50E-02 |
| C6orf1   | 6   | 1                  | 8.20E-02 | 1                  | 8.20E-02 | 1                  | 1.00E+00 | 1                  | 1.00E+00 | 1                  | 2.50E-02 | 1                  | 2.50E-02 |
| HOXA4    | 7   | 1                  | 7.42E-01 | 1                  | 7.42E-01 | 2                  | 8.23E-02 | 2                  | 8.23E-02 | 1                  | 2.50E-02 | 1                  | 2.50E-02 |
| INO80E   | 16  | 2                  | 3.23E-01 | 2                  | 3.23E-01 | 2                  | 2.79E-01 | 2                  | 2.79E-01 | 1                  | 2.50E-02 | 1                  | 2.50E-02 |
| SPDEF    | 6   | 1                  | 7.49E-01 | 1                  | 7.49E-01 | 2                  | 8.88E-02 | 2                  | 8.88E-02 | 1                  | 2.50E-02 | 1                  | 2.50E-02 |
| TALDO1   | 11  | 2                  | 3.19E-01 | 2                  | 3.19E-01 | 2                  | 2.31E-01 | 2                  | 2.31E-01 | 1                  | 2.50E-02 | 1                  | 2.50E-02 |
| BACH1    | 21  | 2                  | 3.19E-01 | 2                  | 3.19E-01 | 3                  | 1.44E-01 | 3                  | 1.44E-01 | 1                  | 2.50E-02 | 1                  | 2.50E-02 |
| DCBLD1   | 6   | 1                  | 7.58E-01 | 1                  | 7.58E-01 | 2                  | 6.09E-02 | 2                  | 6.09E-02 | 1                  | 2.50E-02 | 1                  | 2.50E-02 |
| GTF3C4   | 9   | 2                  | 5.80E-01 | 2                  | 5.80E-01 | 2                  | 1.37E-01 | 2                  | 1.37E-01 | 1                  | 2.50E-02 | 1                  | 2.50E-02 |
| NIPAL1   | 4   | 1                  | 1.03E-01 | 1                  | 1.03E-01 | 1                  | 1.00E+00 | 1                  | 1.00E+00 | 1                  | 2.50E-02 | 1                  | 2.50E-02 |
| SLC25A38 | 3   | 1                  | 7.46E-01 | 1                  | 7.46E-01 | 2                  | 6.19E-02 | 2                  | 6.19E-02 | 1                  | 2.50E-02 | 1                  | 2.50E-02 |
| SRR      | 17  | 2                  | 5.60E-01 | 2                  | 5.60E-01 | 2                  | 1.11E-01 | 2                  | 1.11E-01 | 1                  | 2.50E-02 | 1                  | 2.50E-02 |
| MEGF8    | 19  | 8                  | 5.75E-01 | 8                  | 5.75E-01 | 7                  | 4.57E-02 | 7                  | 4.57E-02 | 5                  | 2.51E-02 | 5                  | 2.51E-02 |
| CSNK1G3  | 5   | 1                  | 7.50E-01 | 1                  | 7.50E-01 | 2                  | 6.87E-02 | 2                  | 6.87E-02 | 1                  | 2.52E-02 | 1                  | 2.52E-02 |
| FTSJ2    | 7   | 1                  | 7.53E-01 | 1                  | 7.53E-01 | 1                  | 5.93E-02 | 1                  | 5.93E-02 | 1                  | 2.52E-02 | 1                  | 2.52E-02 |
| GRHPR    | 9   | 2                  | 5.75E-01 | 2                  | 5.75E-01 | 3                  | 1.35E-01 | 3                  | 1.35E-01 | 1                  | 2.52E-02 | 1                  | 2.52E-02 |
| RTEL1    | 20  | 4                  | 1.55E-01 | 4                  | 1.55E-01 | 5                  | 2.95E-01 | 5                  | 2.95E-01 | 1                  | 2.52E-02 | 1                  | 2.52E-02 |
| SLC25A25 | 9   | 1                  | 1.58E-01 | 1                  | 1.58E-01 | 2                  | 1.11E-01 | 2                  | 1.11E-01 | 1                  | 2.52E-02 | 1                  | 2.52E-02 |
| SLC25A3  | 12  | 1                  | 7.64E-01 | 1                  | 7.64E-01 | 2                  | 6.87E-02 | 2                  | 6.87E-02 | 1                  | 2.52E-02 | 1                  | 2.52E-02 |
| 1-Sep    | 16  | 1                  | 6.01E-02 | 1                  | 6.01E-02 | 1                  | 1.00E+00 | 1                  | 1.00E+00 | 1                  | 2.52E-02 | 1                  | 2.52E-02 |
| LMTK2    | 7   | 1                  | 7.42E-01 | 1                  | 7.42E-01 | 1                  | 5.74E-02 | 1                  | 5.74E-02 | 1                  | 2.52E-02 | 1                  | 2.52E-02 |
| BAIAP2   | 17  | 1                  | 7.58E-01 | 1                  | 7.58E-01 | 2                  | 6.35E-02 | 2                  | 6.35E-02 | 1                  | 2.52E-02 | 1                  | 2.52E-02 |
| DSC2     | 18  | 2                  | 5.75E-01 | 2                  | 5.75E-01 | 3                  | 1.14E-01 | 3                  | 1.14E-01 | 1                  | 2.52E-02 | 1                  | 2.52E-02 |
| FOXN4    | 12  | 2                  | 5.73E-01 | 2                  | 5.73E-01 | 2                  | 1.51E-01 | 2                  | 1.51E-01 | 1                  | 2.52E-02 | 1                  | 2.52E-02 |
| MCM7     | 7   | 2                  | 5.63E-01 | 2                  | 5.63E-01 | 2                  | 1.63E-01 | 2                  | 1.63E-01 | 1                  | 2.52E-02 | 1                  | 2.52E-02 |
| SUPT3H   | 6   | 1                  | 7.61E-01 | 1                  | 7.61E-01 | 2                  | 6.08E-02 | 2                  | 6.08E-02 | 1                  | 2.52E-02 | 1                  | 2.52E-02 |
| TDG      | 12  | 1                  | 7.49E-01 | 1                  | 7.49E-01 | 2                  | 5.94E-02 | 2                  | 5.94E-02 | 1                  | 2.52E-02 | 1                  | 2.52E-02 |
| FDPS     | 1   | 2                  | 1.00E+00 | 2                  | 1.00E+00 | 2                  | 3.87E-02 | 2                  | 3.87E-02 | 2                  | 2.53E-02 | 2                  | 2.53E-02 |
| ABCC2    | 10  | 6                  | 8.68E-03 | 6                  | 8.68E-03 | 7                  | 2.53E-02 | 7                  | 2.53E-02 | 5                  | 1.49E-01 | 5                  | 1.49E-01 |
| FBXO4    | 5   | 2                  | 1.74E-01 | 2                  | 1.74E-01 | 1                  | 2.53E-02 | 1                  | 2.53E-02 | 2                  | 1.72E-01 | 2                  | 1.72E-01 |
| BUB1     | 2   | 2                  | 5.63E-01 | 2                  | 5.63E-01 | 3                  | 1.18E-01 | 3                  | 1.18E-01 | 1                  | 2.53E-02 | 1                  | 2.53E-02 |
| CBLN3    | 14  | 1                  | 7.47E-01 | 1                  | 7.47E-01 | 1                  | 5.85E-02 | 1                  | 5.85E-02 | 1                  | 2.53E-02 | 1                  | 2.53E-02 |
| OR1L3    | 9   | 2                  | 3.14E-01 | 2                  | 3.14E-01 | 2                  | 2.25E-01 | 2                  | 2.25E-01 | 1                  | 2.53E-02 | 1                  | 2.53E-02 |
| TP53TG5  | 20  | 2                  | 5.54E-01 | 2                  | 5.54E-01 | 3                  | 1.24E-01 | 3                  | 1.24E-01 | 1                  | 2.53E-02 | 1                  | 2.53E-02 |
| UTP23    | 8   | 1                  | 6.10E-02 | 2                  | 1.74E-01 |                    |          | 1                  | 6.34E-02 | 1                  | 6.69E-01 | 2                  | 2.54E-02 |

| SetID    | Chr | ADEH- vs NA        |          |                    |          | ADEH+ vs ADEH-     |          |                    |          | ADEH+ vs NA        |          |                    |          |
|----------|-----|--------------------|----------|--------------------|----------|--------------------|----------|--------------------|----------|--------------------|----------|--------------------|----------|
|          |     | rarenovel          |          | all                |          | rarenovel          |          | all                |          | rarenovel          |          | all                |          |
|          |     | N variants in test | p-value  | N variants in test | p-value  | N variants in test | p-value  | N variants in test | p-value  | N variants in test | p-value  | N variants in test | p-value  |
| MTUS1    | 8   | 13                 | 5.72E-01 | 13                 | 5.72E-01 | 13                 | 4.97E-02 | 13                 | 4.97E-02 | 5                  | 2.55E-02 | 5                  | 2.55E-02 |
| KRT39    | 17  | 2                  | 6.10E-01 | 2                  | 6.10E-01 | 2                  | 2.55E-02 | 2                  | 2.55E-02 | 3                  | 1.27E-01 | 3                  | 1.27E-01 |
| SH3PXD2A | 10  | 5                  | 3.56E-01 | 5                  | 3.56E-01 | 5                  | 1.01E-01 | 5                  | 1.01E-01 | 2                  | 2.55E-02 | 2                  | 2.55E-02 |
| B4GALNT1 | 12  | 1                  | 7.55E-01 | 1                  | 7.55E-01 | 1                  | 6.64E-02 | 1                  | 6.64E-02 | 1                  | 2.56E-02 | 1                  | 2.56E-02 |
| C22orf23 | 22  | 1                  | 7.33E-01 | 1                  | 7.33E-01 | 1                  | 6.52E-02 | 1                  | 6.52E-02 | 1                  | 2.56E-02 | 1                  | 2.56E-02 |
| DCAF4L2  | 8   | 1                  | 4.09E-01 | 1                  | 4.09E-01 | 1                  | 1.10E-01 | 1                  | 1.10E-01 | 1                  | 2.56E-02 | 1                  | 2.56E-02 |
| HCRTR1   | 1   | 1                  | 7.58E-01 | 1                  | 7.58E-01 | 2                  | 7.30E-02 | 2                  | 7.30E-02 | 1                  | 2.56E-02 | 1                  | 2.56E-02 |
| L3MBTL1  | 20  | 5                  | 1.02E-01 | 5                  | 1.02E-01 | 5                  | 6.51E-01 | 5                  | 6.51E-01 | 1                  | 2.56E-02 | 1                  | 2.56E-02 |
| MTFR1L   | 1   | 1                  | 7.38E-01 | 1                  | 7.38E-01 | 2                  | 7.67E-02 | 2                  | 7.67E-02 | 1                  | 2.56E-02 | 1                  | 2.56E-02 |
| SRPK1    | 6   | 1                  | 7.35E-01 | 1                  | 7.35E-01 | 2                  | 7.48E-02 | 2                  | 7.48E-02 | 1                  | 2.56E-02 | 1                  | 2.56E-02 |
| TMEM45B  | 11  | 1                  | 7.44E-01 | 1                  | 7.44E-01 | 1                  | 5.84E-02 | 1                  | 5.84E-02 | 1                  | 2.56E-02 | 1                  | 2.56E-02 |
| WNK1     | 12  | 9                  | 2.69E-01 | 9                  | 2.69E-01 | 10                 | 1.87E-01 | 10                 | 1.87E-01 | 3                  | 2.56E-02 | 3                  | 2.56E-02 |
| C2orf71  | 2   | 5                  | 7.83E-01 | 5                  | 7.83E-01 | 4                  | 2.57E-02 | 4                  | 2.57E-02 | 4                  | 8.29E-02 | 4                  | 8.29E-02 |
| ERICH3   | 1   | 1                  | 7.55E-02 | 2                  | 7.55E-02 |                    |          | 1                  | 2.58E-02 | 1                  | 6.12E-01 | 2                  | 6.12E-01 |
| CDNF     | 10  | 1                  | 4.23E-01 | 1                  | 4.23E-01 | 1                  | 2.99E-02 | 1                  | 2.99E-02 | 1                  | 2.60E-02 | 1                  | 2.60E-02 |
| FGG      | 4   | 2                  | 7.19E-01 | 2                  | 7.19E-01 | 3                  | 5.85E-02 | 3                  | 5.85E-02 | 2                  | 2.60E-02 | 2                  | 2.60E-02 |
| CEP68    | 2   | 2                  | 7.02E-01 | 2                  | 7.02E-01 | 2                  | 4.61E-02 | 2                  | 4.61E-02 | 1                  | 2.61E-02 | 1                  | 2.61E-02 |
| SUGP1    | 19  |                    |          | 1                  | 7.66E-01 |                    |          | 1                  | 4.79E-02 |                    |          | 1                  | 2.62E-02 |
| L3MBTL4  | 18  | 1                  | 7.52E-01 | 1                  | 7.52E-01 | 2                  | 7.47E-02 | 2                  | 7.47E-02 | 1                  | 2.62E-02 | 1                  | 2.62E-02 |
| DDO      | 6   | 2                  | 7.60E-02 | 2                  | 7.60E-02 | 3                  | 1.78E-01 | 3                  | 1.78E-01 | 1                  | 2.62E-02 | 1                  | 2.62E-02 |
| JUP      | 17  | 3                  | 3.56E-01 | 4                  | 1.00E+00 | 4                  | 1.37E-01 | 5                  | 2.87E-01 | 1                  | 2.62E-02 | 2                  | 1.88E-01 |
| MRO      | 18  | 1                  | 4.09E-01 | 1                  | 4.09E-01 | 2                  | 1.07E-01 | 2                  | 1.07E-01 | 1                  | 2.62E-02 | 1                  | 2.62E-02 |
| NCAPH2   | 22  | 2                  | 5.68E-01 | 2                  | 5.68E-01 | 2                  | 1.61E-01 | 2                  | 1.61E-01 | 1                  | 2.62E-02 | 1                  | 2.62E-02 |
| PIWIL1   | 12  | 1                  | 7.61E-01 | 1                  | 7.61E-01 | 2                  | 7.08E-02 | 2                  | 7.08E-02 | 1                  | 2.62E-02 | 1                  | 2.62E-02 |
| RAD51D   | 17  | 2                  | 5.72E-01 | 2                  | 5.72E-01 | 3                  | 1.30E-01 | 3                  | 1.30E-01 | 1                  | 2.62E-02 | 1                  | 2.62E-02 |
| SMPD2    | 6   | 2                  | 5.78E-01 | 2                  | 5.78E-01 | 2                  | 1.60E-01 | 2                  | 1.60E-01 | 1                  | 2.62E-02 | 1                  | 2.62E-02 |
| USF2     | 19  | 1                  | 7.55E-01 | 1                  | 7.55E-01 | 2                  | 6.55E-02 | 2                  | 6.55E-02 | 1                  | 2.62E-02 | 1                  | 2.62E-02 |
| YBX3     | 12  | 2                  | 3.12E-01 | 2                  | 3.12E-01 | 2                  | 2.27E-01 | 2                  | 2.27E-01 | 1                  | 2.62E-02 | 1                  | 2.62E-02 |
| OR6C74   | 12  | 3                  | 4.27E-02 | 4                  | 4.27E-02 | 3                  | 2.44E-01 | 4                  | 2.44E-01 | 3                  | 2.62E-02 | 4                  | 2.62E-02 |
| ACO1     | 9   | 7                  | 2.60E-01 | 7                  | 2.60E-01 | 4                  | 2.63E-02 | 4                  | 2.63E-02 | 5                  | 1.36E-01 | 5                  | 1.36E-01 |
| CD79A    | 19  | 2                  | 6.82E-01 | 2                  | 6.82E-01 | 1                  | 2.65E-02 | 1                  | 2.65E-02 | 2                  | 4.86E-02 | 2                  | 4.86E-02 |
| S1PR3    | 9   | 2                  | 6.06E-01 | 2                  | 6.06E-01 | 2                  | 7.96E-02 | 2                  | 7.96E-02 | 2                  | 2.65E-02 | 2                  | 2.65E-02 |
| PBK      | 8   | 3                  | 3.40E-01 | 3                  | 3.40E-01 | 4                  | 2.23E-01 | 4                  | 2.23E-01 | 1                  | 2.66E-02 | 1                  | 2.66E-02 |
| DVL3     | 3   | 2                  | 5.70E-01 | 2                  | 5.70E-01 | 3                  | 1.39E-01 | 3                  | 1.39E-01 | 1                  | 2.66E-02 | 1                  | 2.66E-02 |
| FGFR4    | 5   | 6                  | 8.11E-02 | 6                  | 8.11E-02 | 7                  | 4.83E-01 | 7                  | 4.83E-01 | 1                  | 2.66E-02 | 1                  | 2.66E-02 |
| GATA6    | 18  | 1                  | 1.45E-01 | 1                  | 1.45E-01 | 1                  | 2.33E-01 | 1                  | 2.33E-01 | 1                  | 2.66E-02 | 1                  | 2.66E-02 |
| GRK5     | 10  | 1                  | 7.26E-01 | 1                  | 7.26E-01 | 2                  | 6.48E-02 | 2                  | 6.48E-02 | 1                  | 2.66E-02 | 1                  | 2.66E-02 |
| MAP1S    | 19  | 3                  | 1.31E-01 | 4                  | 1.30E-01 | 3                  | 2.81E-01 | 4                  | 2.82E-01 | 1                  | 2.66E-02 | 2                  | 2.76E-02 |
| NIPAL2   | 8   | 2                  | 5.67E-01 | 2                  | 5.67E-01 | 2                  | 1.80E-01 | 2                  | 1.80E-01 | 1                  | 2.66E-02 | 1                  | 2.66E-02 |
| QARS     | 3   | 2                  | 1.43E-01 | 2                  | 1.43E-01 | 3                  | 1.91E-01 | 3                  | 1.91E-01 | 1                  | 2.66E-02 | 1                  | 2.66E-02 |
| SHC2     | 19  | 4                  | 1.15E-01 | 4                  | 1.15E-01 | 5                  | 3.19E-01 | 5                  | 3.19E-01 | 1                  | 2.66E-02 | 1                  | 2.66E-02 |
| TAF2     | 8   | 1                  | 7.46E-01 | 1                  | 7.46E-01 | 2                  | 7.45E-02 | 2                  | 7.45E-02 | 1                  | 2.66E-02 | 1                  | 2.66E-02 |
| TGM3     | 20  | 4                  | 1.58E-01 | 4                  | 1.58E-01 | 4                  | 3.83E-01 | 4                  | 3.83E-01 | 1                  | 2.66E-02 | 1                  | 2.66E-02 |
| PROB1    | 5   | 2                  | 5.74E-01 | 3                  | 5.65E-01 | 3                  | 1.17E-01 | 4                  | 1.17E-01 | 1                  | 2.83E-02 | 2                  | 2.66E-02 |
| CALY     | 10  | 1                  | 2.40E-01 | 1                  | 2.40E-01 | 1                  | 1.89E-01 | 1                  | 1.89E-01 | 1                  | 2.66E-02 | 1                  | 2.66E-02 |
| CACNB4   | 2   | 2                  | 3.21E-01 | 2                  | 3.21E-01 | 2                  | 2.25E-01 | 2                  | 2.25E-01 | 1                  | 2.67E-02 | 1                  | 2.67E-02 |
| MCM5     | 22  | 3                  | 3.29E-01 | 3                  | 3.29E-01 | 4                  | 2.04E-01 | 4                  | 2.04E-01 | 1                  | 2.67E-02 | 1                  | 2.67E-02 |
| NME6     | 3   | 1                  | 7.44E-01 | 1                  | 7.44E-01 | 2                  | 6.10E-02 | 2                  | 6.10E-02 | 1                  | 2.67E-02 | 1                  | 2.67E-02 |

| SetID         | Chr | ADEH- vs NA        |          |                    |          | ADEH+ vs ADEH-     |          |                    |          | ADEH+ vs NA        |          |                    |          |
|---------------|-----|--------------------|----------|--------------------|----------|--------------------|----------|--------------------|----------|--------------------|----------|--------------------|----------|
|               |     | rarenovel          |          | all                |          | rarenovel          |          | all                |          | rarenovel          |          | all                |          |
|               |     | N variants in test | p-value  | N variants in test | p-value  | N variants in test | p-value  | N variants in test | p-value  | N variants in test | p-value  | N variants in test | p-value  |
| PKN1          | 19  | 1                  | 7.44E-01 | 1                  | 7.44E-01 | 2                  | 5.87E-02 | 2                  | 5.87E-02 | 1                  | 2.67E-02 | 1                  | 2.67E-02 |
| SPEM1         | 17  | 1                  | 1.61E-01 | 1                  | 1.61E-01 | 1                  | 1.88E-01 | 1                  | 1.88E-01 | 1                  | 2.67E-02 | 1                  | 2.67E-02 |
| TNFRSF21      | 6   | 2                  | 5.74E-01 | 2                  | 5.74E-01 | 3                  | 1.16E-01 | 3                  | 1.16E-01 | 1                  | 2.67E-02 | 1                  | 2.67E-02 |
| TRMT44        | 4   | 4                  | 1.47E-01 | 4                  | 1.47E-01 | 4                  | 3.56E-01 | 4                  | 3.56E-01 | 1                  | 2.67E-02 | 1                  | 2.67E-02 |
| UBASH3A       | 21  | 2                  | 3.35E-01 | 3                  | 7.04E-01 | 3                  | 1.63E-01 | 4                  | 9.17E-02 | 1                  | 2.67E-02 | 2                  | 6.54E-02 |
| PLBD1         | 12  | 2                  | 1.00E+00 | 3                  | 1.00E+00 | 2                  | 2.69E-02 | 3                  | 2.69E-02 | 1                  | 4.85E-02 | 2                  | 4.85E-02 |
| CAMSAP2       | 1   | 6                  | 7.16E-01 | 6                  | 7.16E-01 | 3                  | 2.70E-02 | 3                  | 2.70E-02 | 4                  | 3.02E-02 | 4                  | 3.02E-02 |
| PROM2         | 2   | 2                  | 7.30E-02 | 2                  | 7.30E-02 | 2                  | 2.70E-02 | 2                  | 2.70E-02 | 3                  | 4.28E-01 | 3                  | 4.28E-01 |
| LMOD2         | 7   | 5                  | 8.57E-02 | 5                  | 8.57E-02 | 5                  | 5.34E-01 | 5                  | 5.34E-01 | 1                  | 2.70E-02 | 1                  | 2.70E-02 |
| MEIS3         | 19  | 3                  | 1.92E-01 | 3                  | 1.92E-01 | 4                  | 2.39E-01 | 4                  | 2.39E-01 | 1                  | 2.70E-02 | 1                  | 2.70E-02 |
| NREP          | 5   | 1                  | 2.37E-01 | 1                  | 2.37E-01 | 1                  | 1.61E-01 | 1                  | 1.61E-01 | 1                  | 2.70E-02 | 1                  | 2.70E-02 |
| SRF           | 6   | 2                  | 9.62E-02 | 2                  | 9.62E-02 | 3                  | 1.60E-01 | 3                  | 1.60E-01 | 1                  | 2.70E-02 | 1                  | 2.70E-02 |
| ACOX1         | 17  | 2                  | 5.66E-01 | 2                  | 5.66E-01 | 2                  | 1.67E-01 | 2                  | 1.67E-01 | 1                  | 2.71E-02 | 1                  | 2.71E-02 |
| ADCY6         | 12  | 3                  | 1.53E-01 | 3                  | 1.53E-01 | 4                  | 2.29E-01 | 4                  | 2.29E-01 | 1                  | 2.71E-02 | 1                  | 2.71E-02 |
| ADGRG3        | 16  | 3                  | 1.56E-01 | 3                  | 1.56E-01 | 3                  | 2.88E-01 | 3                  | 2.88E-01 | 1                  | 2.71E-02 | 1                  | 2.71E-02 |
| ADH5          | 4   | 2                  | 3.20E-01 | 2                  | 3.20E-01 | 2                  | 1.70E-01 | 2                  | 1.70E-01 | 1                  | 2.71E-02 | 1                  | 2.71E-02 |
| BCL2L12       | 19  | 1                  | 4.14E-01 | 1                  | 4.14E-01 | 1                  | 1.04E-01 | 1                  | 1.04E-01 | 1                  | 2.71E-02 | 1                  | 2.71E-02 |
| RALYL         | 8   | 1                  | 7.44E-01 | 1                  | 7.44E-01 | 2                  | 6.63E-02 | 2                  | 6.63E-02 | 1                  | 2.71E-02 | 1                  | 2.71E-02 |
| TRMT5         | 14  | 2                  | 5.47E-01 | 2                  | 5.47E-01 | 3                  | 1.12E-01 | 3                  | 1.12E-01 | 1                  | 2.71E-02 | 1                  | 2.71E-02 |
| KANSL1        | 17  | 1                  | 7.58E-01 | 1                  | 7.58E-01 | 2                  | 7.60E-02 | 2                  | 7.60E-02 | 1                  | 2.71E-02 | 1                  | 2.71E-02 |
| ARHGAP5       | 14  | 2                  | 5.74E-01 | 2                  | 5.74E-01 | 2                  | 1.29E-01 | 2                  | 1.29E-01 | 1                  | 2.71E-02 | 1                  | 2.71E-02 |
| HIST1H1T      | 6   | 2                  | 5.57E-01 | 3                  | 6.40E-01 | 3                  | 1.37E-01 | 4                  | 1.96E-01 | 1                  | 2.71E-02 | 2                  | 9.54E-02 |
| RBSN          | 3   | 2                  | 6.82E-01 | 2                  | 6.82E-01 | 2                  | 2.73E-02 | 2                  | 2.73E-02 | 3                  | 3.95E-02 | 3                  | 3.95E-02 |
| ZBTB11        | 3   | 2                  | 5.68E-01 | 2                  | 5.68E-01 | 3                  | 1.16E-01 | 3                  | 1.16E-01 | 1                  | 2.76E-02 | 1                  | 2.76E-02 |
| ANKS1A        | 6   | 2                  | 5.59E-01 | 2                  | 5.59E-01 | 3                  | 1.30E-01 | 3                  | 1.30E-01 | 1                  | 2.76E-02 | 1                  | 2.76E-02 |
| CLIP1         | 12  | 1                  | 4.13E-01 | 2                  | 1.39E-01 | 1                  | 1.11E-01 | 2                  | 2.54E-01 | 1                  | 2.76E-02 | 2                  | 4.55E-02 |
| FOXD2         | 1   | 1                  | 1.59E-01 | 1                  | 1.59E-01 | 1                  | 2.27E-01 | 1                  | 2.27E-01 | 1                  | 2.76E-02 | 1                  | 2.76E-02 |
| LOXL4         | 10  | 6                  | 1.81E-01 | 7                  | 1.81E-01 | 6                  | 5.09E-01 | 7                  | 5.09E-01 | 1                  | 2.76E-02 | 2                  | 2.76E-02 |
| MME           | 3   | 3                  | 3.32E-01 | 3                  | 3.32E-01 | 4                  | 2.06E-01 | 4                  | 2.06E-01 | 1                  | 2.76E-02 | 1                  | 2.76E-02 |
| RBBP6         | 16  | 4                  | 9.55E-02 | 4                  | 9.55E-02 | 4                  | 3.96E-01 | 4                  | 3.96E-01 | 1                  | 2.76E-02 | 1                  | 2.76E-02 |
| SEC23IP       | 10  | 3                  | 1.96E-01 | 3                  | 1.96E-01 | 4                  | 2.18E-01 | 4                  | 2.18E-01 | 1                  | 2.76E-02 | 1                  | 2.76E-02 |
| VGLL3         | 3   | 1                  | 7.48E-01 | 1                  | 7.48E-01 | 1                  | 4.71E-02 | 1                  | 4.71E-02 | 1                  | 2.76E-02 | 1                  | 2.76E-02 |
| DMRTC2        | 19  | 3                  | 2.05E-01 | 3                  | 2.05E-01 | 3                  | 3.85E-01 | 3                  | 3.85E-01 | 1                  | 2.76E-02 | 1                  | 2.76E-02 |
| FTCD          | 21  | 1                  | 7.49E-01 | 1                  | 7.49E-01 | 2                  | 6.83E-02 | 2                  | 6.83E-02 | 1                  | 2.76E-02 | 1                  | 2.76E-02 |
| OR52E4        | 11  | 1                  | 7.48E-01 | 1                  | 7.48E-01 | 2                  | 7.00E-02 | 2                  | 7.00E-02 | 1                  | 2.76E-02 | 1                  | 2.76E-02 |
| PAMR1         | 11  | 2                  | 5.84E-01 | 2                  | 5.84E-01 | 3                  | 1.31E-01 | 3                  | 1.31E-01 | 1                  | 2.76E-02 | 1                  | 2.76E-02 |
| SPATS2L       | 2   | 1                  | 2.37E-01 | 1                  | 2.37E-01 | 1                  | 1.60E-01 | 1                  | 1.60E-01 | 1                  | 2.76E-02 | 1                  | 2.76E-02 |
| UBAP2         | 9   | 3                  | 2.07E-01 | 3                  | 2.07E-01 | 4                  | 2.35E-01 | 4                  | 2.35E-01 | 1                  | 2.76E-02 | 1                  | 2.76E-02 |
| CDC16         | 13  | 1                  | 7.52E-01 | 1                  | 7.52E-01 | 2                  | 8.53E-02 | 2                  | 8.53E-02 | 1                  | 2.76E-02 | 1                  | 2.76E-02 |
| F12           | 5   | 1                  | 7.61E-01 | 1                  | 7.61E-01 | 2                  | 8.71E-02 | 2                  | 8.71E-02 | 1                  | 2.76E-02 | 1                  | 2.76E-02 |
| MLPH          | 2   | 2                  | 1.37E-01 | 2                  | 1.37E-01 | 3                  | 2.17E-01 | 3                  | 2.17E-01 | 1                  | 2.76E-02 | 1                  | 2.76E-02 |
| SLC15A2       | 3   | 3                  | 3.31E-01 | 4                  | 3.31E-01 | 4                  | 2.46E-01 | 5                  | 2.46E-01 | 1                  | 2.76E-02 | 2                  | 2.76E-02 |
| TAS1R2        | 1   | 3                  | 3.79E-01 | 3                  | 3.79E-01 | 4                  | 2.45E-01 | 4                  | 2.45E-01 | 1                  | 2.76E-02 | 1                  | 2.76E-02 |
| TNFAIP8L2-SCI | 1   | 1                  | 4.06E-01 | 1                  | 4.06E-01 | 1                  | 1.33E-01 | 1                  | 1.33E-01 | 1                  | 2.77E-02 | 1                  | 2.77E-02 |
| AFP           | 4   | 1                  | 7.61E-01 | 1                  | 7.61E-01 | 2                  | 8.55E-02 | 2                  | 8.55E-02 | 1                  | 2.77E-02 | 1                  | 2.77E-02 |
| PCDHGA12      | 5   | 1                  | 4.07E-01 | 1                  | 4.07E-01 | 1                  | 1.21E-01 | 1                  | 1.21E-01 | 1                  | 2.77E-02 | 1                  | 2.77E-02 |
| PEMT          | 17  | 2                  | 1.97E-01 | 2                  | 1.97E-01 | 2                  | 3.41E-01 | 2                  | 3.41E-01 | 1                  | 2.77E-02 | 1                  | 2.77E-02 |
| CRACR2B       | 11  | 2                  | 5.72E-01 | 2                  | 5.72E-01 | 3                  | 1.38E-01 | 3                  | 1.38E-01 | 1                  | 2.77E-02 | 1                  | 2.77E-02 |

| SetID    | Chr | ADEH- vs NA        |          |                    |          | ADEH+ vs ADEH-     |          |                    |          | ADEH+ vs NA        |          |                    |          |
|----------|-----|--------------------|----------|--------------------|----------|--------------------|----------|--------------------|----------|--------------------|----------|--------------------|----------|
|          |     | rarenovel          |          | all                |          | rarenovel          |          | all                |          | rarenovel          |          | all                |          |
|          |     | N variants in test | p-value  | N variants in test | p-value  | N variants in test | p-value  | N variants in test | p-value  | N variants in test | p-value  | N variants in test | p-value  |
| CYP2U1   | 4   | 1                  | 7.36E-01 | 1                  | 7.36E-01 | 2                  | 7.04E-02 | 2                  | 7.04E-02 | 1                  | 2.77E-02 | 1                  | 2.77E-02 |
| HPS6     | 10  | 3                  | 1.97E-01 | 3                  | 1.97E-01 | 3                  | 3.83E-01 | 3                  | 3.83E-01 | 1                  | 2.77E-02 | 1                  | 2.77E-02 |
| NOP2     | 12  | 3                  | 3.31E-01 | 3                  | 3.31E-01 | 4                  | 2.17E-01 | 4                  | 2.17E-01 | 1                  | 2.77E-02 | 1                  | 2.77E-02 |
| PRLR     | 5   | 1                  | 7.51E-01 | 1                  | 7.51E-01 | 1                  | 8.41E-02 | 1                  | 8.41E-02 | 1                  | 2.77E-02 | 1                  | 2.77E-02 |
| RRP1     | 21  | 1                  | 7.23E-01 | 1                  | 7.23E-01 | 1                  | 9.59E-02 | 1                  | 9.59E-02 | 1                  | 2.77E-02 | 1                  | 2.77E-02 |
| CD48     | 1   | 1                  | 7.45E-01 | 2                  | 6.14E-01 | 1                  | 4.68E-01 | 2                  | 4.65E-01 |                    |          | 1                  | 2.77E-02 |
| CEP44    | 4   | 2                  | 5.76E-01 | 2                  | 5.76E-01 | 3                  | 1.71E-01 | 3                  | 1.71E-01 | 1                  | 2.77E-02 | 1                  | 2.77E-02 |
| FANCD2   | 3   | 1                  | 7.54E-01 | 1                  | 7.54E-01 | 2                  | 8.74E-02 | 2                  | 8.74E-02 | 1                  | 2.77E-02 | 1                  | 2.77E-02 |
| LNx2     | 13  | 1                  | 4.09E-01 | 1                  | 4.09E-01 | 1                  | 1.19E-01 | 1                  | 1.19E-01 | 1                  | 2.77E-02 | 1                  | 2.77E-02 |
| PMM2     | 16  | 3                  | 8.70E-02 | 3                  | 8.70E-02 | 3                  | 7.44E-01 | 3                  | 7.44E-01 | 1                  | 2.77E-02 | 1                  | 2.77E-02 |
| SLAMF9   | 1   | 1                  | 7.48E-01 | 1                  | 7.48E-01 | 2                  | 8.14E-02 | 2                  | 8.14E-02 | 1                  | 2.77E-02 | 1                  | 2.77E-02 |
| CLSTN1   | 1   | 3                  | 1.10E-01 | 3                  | 1.10E-01 | 3                  | 4.93E-01 | 3                  | 4.93E-01 | 1                  | 2.79E-02 | 1                  | 2.79E-02 |
| COPA     | 1   | 2                  | 5.81E-01 | 2                  | 5.81E-01 | 3                  | 1.56E-01 | 3                  | 1.56E-01 | 1                  | 2.79E-02 | 1                  | 2.79E-02 |
| CFI      | 4   | 2                  | 5.78E-01 | 2                  | 5.78E-01 | 2                  | 1.83E-01 | 2                  | 1.83E-01 | 1                  | 2.80E-02 | 1                  | 2.80E-02 |
| CLDN14   | 21  | 3                  | 2.05E-01 | 3                  | 2.05E-01 | 3                  | 3.03E-01 | 3                  | 3.03E-01 | 1                  | 2.80E-02 | 1                  | 2.80E-02 |
| MFGE8    | 15  | 2                  | 1.06E-01 | 2                  | 1.06E-01 | 2                  | 6.40E-01 | 2                  | 6.40E-01 | 1                  | 2.80E-02 | 1                  | 2.80E-02 |
| NR1H4    | 12  | 1                  | 8.31E-02 | 1                  | 8.31E-02 | 1                  | 1.00E+00 | 1                  | 1.00E+00 | 1                  | 2.80E-02 | 1                  | 2.80E-02 |
| SMAP2    | 1   | 1                  | 4.15E-01 | 1                  | 4.15E-01 | 1                  | 8.73E-02 | 1                  | 8.73E-02 | 1                  | 2.80E-02 | 1                  | 2.80E-02 |
| SYVN1    | 11  | 1                  | 7.59E-01 | 1                  | 7.59E-01 | 1                  | 7.29E-02 | 1                  | 7.29E-02 | 1                  | 2.80E-02 | 1                  | 2.80E-02 |
| ZNF169   | 9   | 3                  | 2.24E-01 | 5                  | 9.56E-02 | 3                  | 3.83E-01 | 5                  | 3.34E-01 | 1                  | 2.80E-02 | 3                  | 6.21E-02 |
| KLHL17   | 1   | 2                  | 5.87E-01 | 2                  | 5.87E-01 | 2                  | 1.41E-01 | 2                  | 1.41E-01 | 1                  | 2.82E-02 | 1                  | 2.82E-02 |
| PODN     | 1   | 3                  | 4.22E-03 | 3                  | 4.22E-03 | 2                  | 2.82E-02 | 2                  | 2.82E-02 | 2                  | 1.00E+00 | 2                  | 1.00E+00 |
| SIN3B    | 19  | 1                  | 7.51E-01 | 1                  | 7.51E-01 | 2                  | 6.49E-02 | 2                  | 6.49E-02 | 1                  | 2.83E-02 | 1                  | 2.83E-02 |
| TXNRD2   | 22  | 1                  | 2.41E-01 | 1                  | 2.41E-01 | 2                  | 1.22E-01 | 2                  | 1.22E-01 | 1                  | 2.83E-02 | 1                  | 2.83E-02 |
| CYP2R1   | 11  | 2                  | 5.78E-01 | 2                  | 5.78E-01 | 3                  | 1.19E-01 | 3                  | 1.19E-01 | 1                  | 2.83E-02 | 1                  | 2.83E-02 |
| EXD2     | 14  | 1                  | 7.38E-01 | 1                  | 7.38E-01 | 2                  | 6.79E-02 | 2                  | 6.79E-02 | 1                  | 2.83E-02 | 1                  | 2.83E-02 |
| EXOSC9   | 4   | 1                  | 7.53E-01 | 1                  | 7.53E-01 | 2                  | 6.43E-02 | 2                  | 6.43E-02 | 1                  | 2.83E-02 | 1                  | 2.83E-02 |
| MFHAS1   | 8   | 2                  | 3.27E-01 | 2                  | 3.27E-01 | 3                  | 1.56E-01 | 3                  | 1.56E-01 | 1                  | 2.83E-02 | 1                  | 2.83E-02 |
| MTX3     | 5   | 1                  | 7.39E-01 | 1                  | 7.39E-01 | 2                  | 5.97E-02 | 2                  | 5.97E-02 | 1                  | 2.83E-02 | 1                  | 2.83E-02 |
| OR7E24   | 19  | 2                  | 2.83E-01 | 2                  | 2.83E-01 | 3                  | 1.76E-01 | 3                  | 1.76E-01 | 1                  | 2.83E-02 | 1                  | 2.83E-02 |
| TLR10    | 4   | 3                  | 3.44E-01 | 3                  | 3.44E-01 | 3                  | 2.39E-01 | 3                  | 2.39E-01 | 1                  | 2.83E-02 | 1                  | 2.83E-02 |
| ARL13B   | 3   | 2                  | 7.03E-01 | 2                  | 7.03E-01 | 3                  | 5.00E-02 | 3                  | 5.00E-02 | 2                  | 2.83E-02 | 2                  | 2.83E-02 |
| RBM11    | 21  | 2                  | 8.86E-02 | 2                  | 8.86E-02 | 3                  | 1.50E-01 | 3                  | 1.50E-01 | 2                  | 2.83E-02 | 2                  | 2.83E-02 |
| C2orf54  | 2   | 1                  | 7.51E-01 | 1                  | 7.51E-01 | 2                  | 6.27E-02 | 2                  | 6.27E-02 | 1                  | 2.83E-02 | 1                  | 2.83E-02 |
| GPATCH11 | 2   | 1                  | 7.57E-01 | 1                  | 7.57E-01 | 2                  | 6.43E-02 | 2                  | 6.43E-02 | 1                  | 2.83E-02 | 1                  | 2.83E-02 |
| GPN2     | 1   | 1                  | 7.47E-01 | 1                  | 7.47E-01 | 2                  | 6.17E-02 | 2                  | 6.17E-02 | 1                  | 2.83E-02 | 1                  | 2.83E-02 |
| SPINK13  | 5   | 1                  | 7.42E-01 | 1                  | 7.42E-01 | 2                  | 6.26E-02 | 2                  | 6.26E-02 | 1                  | 2.83E-02 | 1                  | 2.83E-02 |
| SRGAP3   | 3   | 1                  | 3.97E-01 | 1                  | 3.97E-01 | 2                  | 1.14E-01 | 2                  | 1.14E-01 | 1                  | 2.83E-02 | 1                  | 2.83E-02 |
| IL17RA   | 22  | 4                  | 3.40E-01 | 4                  | 3.40E-01 | 3                  | 1.81E-01 | 3                  | 1.81E-01 | 3                  | 2.84E-02 | 3                  | 2.84E-02 |
| ARHGEF25 | 12  | 1                  | 2.16E-01 | 1                  | 2.16E-01 | 2                  | 6.59E-02 | 2                  | 6.59E-02 | 2                  | 2.86E-02 | 2                  | 2.86E-02 |
| NPC1L1   | 7   | 4                  | 3.46E-01 | 4                  | 3.46E-01 | 4                  | 1.30E-01 | 4                  | 1.30E-01 | 3                  | 2.87E-02 | 3                  | 2.87E-02 |
| PAPOLB   | 7   | 1                  | 7.75E-01 | 1                  | 7.75E-01 | 1                  | 2.87E-02 | 1                  | 2.87E-02 | 1                  | 5.43E-02 | 1                  | 5.43E-02 |
| IL17F    | 6   |                    |          | 2                  | 5.30E-01 |                    |          | 2                  | 2.87E-02 |                    |          | 2                  | 1.45E-01 |
| OR4C16   | 11  | 2                  | 5.74E-01 | 3                  | 5.67E-01 | 2                  | 1.76E-01 | 3                  | 1.76E-01 | 1                  | 2.90E-02 | 2                  | 2.88E-02 |
| MTMR3    | 22  | 1                  | 7.52E-01 | 1                  | 7.52E-01 | 2                  | 7.08E-02 | 2                  | 7.08E-02 | 1                  | 2.90E-02 | 1                  | 2.90E-02 |
| KCNQ2    | 20  | 1                  | 7.52E-01 | 1                  | 7.52E-01 | 2                  | 7.26E-02 | 2                  | 7.26E-02 | 1                  | 2.90E-02 | 1                  | 2.90E-02 |
| ARHGAP26 | 5   | 2                  | 5.71E-01 | 2                  | 5.71E-01 | 3                  | 1.22E-01 | 3                  | 1.22E-01 | 1                  | 2.90E-02 | 1                  | 2.90E-02 |
| GFRAL    | 6   | 2                  | 5.62E-01 | 2                  | 5.62E-01 | 2                  | 1.51E-01 | 2                  | 1.51E-01 | 1                  | 2.90E-02 | 1                  | 2.90E-02 |

| SetID     | Chr | ADEH- vs NA        |          |                    |          | ADEH+ vs ADEH-     |          |                    |          | ADEH+ vs NA        |          |                    |          |
|-----------|-----|--------------------|----------|--------------------|----------|--------------------|----------|--------------------|----------|--------------------|----------|--------------------|----------|
|           |     | rarenovel          |          | all                |          | rarenovel          |          | all                |          | rarenovel          |          | all                |          |
|           |     | N variants in test | p-value  | N variants in test | p-value  | N variants in test | p-value  | N variants in test | p-value  | N variants in test | p-value  | N variants in test | p-value  |
| GSG1L     | 16  | 1                  | 4.12E-01 | 1                  | 4.12E-01 | 1                  | 7.92E-02 | 1                  | 7.92E-02 | 1                  | 2.90E-02 | 1                  | 2.90E-02 |
| IFNE      | 9   | 1                  | 2.09E-01 | 1                  | 2.09E-01 | 1                  | 2.16E-01 | 1                  | 2.16E-01 | 1                  | 2.90E-02 | 1                  | 2.90E-02 |
| RRM1      | 11  | 1                  | 7.61E-01 | 1                  | 7.61E-01 | 1                  | 7.30E-02 | 1                  | 7.30E-02 | 1                  | 2.90E-02 | 1                  | 2.90E-02 |
| SLC6A19   | 5   | 1                  | 7.48E-01 | 1                  | 7.48E-01 | 2                  | 6.76E-02 | 2                  | 6.76E-02 | 1                  | 2.90E-02 | 1                  | 2.90E-02 |
| VSIG2     | 11  | 2                  | 5.62E-01 | 2                  | 5.62E-01 | 2                  | 1.52E-01 | 2                  | 1.52E-01 | 1                  | 2.90E-02 | 1                  | 2.90E-02 |
| CRY2      | 11  | 1                  | 7.45E-01 | 1                  | 7.45E-01 | 2                  | 7.46E-02 | 2                  | 7.46E-02 | 1                  | 2.90E-02 | 1                  | 2.90E-02 |
| AUNIP     | 1   | 1                  | 7.61E-01 | 1                  | 7.61E-01 | 1                  | 6.49E-02 | 1                  | 6.49E-02 | 1                  | 2.90E-02 | 1                  | 2.90E-02 |
| KIAA1958  | 9   | 1                  | 7.60E-01 | 1                  | 7.60E-01 | 2                  | 7.25E-02 | 2                  | 7.25E-02 | 1                  | 2.90E-02 | 1                  | 2.90E-02 |
| KIF14     | 1   | 3                  | 1.55E-01 | 3                  | 1.55E-01 | 4                  | 2.36E-01 | 4                  | 2.36E-01 | 1                  | 2.90E-02 | 1                  | 2.90E-02 |
| KNOP1     | 16  | 1                  | 1.15E-01 | 1                  | 1.15E-01 | 1                  | 3.71E-01 | 1                  | 3.71E-01 | 1                  | 2.90E-02 | 1                  | 2.90E-02 |
| ODF2L     | 1   | 2                  | 5.87E-01 | 2                  | 5.87E-01 | 3                  | 1.26E-01 | 3                  | 1.26E-01 | 1                  | 2.90E-02 | 1                  | 2.90E-02 |
| OR5AS1    | 11  | 1                  | 7.56E-01 | 1                  | 7.56E-01 | 2                  | 7.75E-02 | 2                  | 7.75E-02 | 1                  | 2.90E-02 | 1                  | 2.90E-02 |
| PRDM13    | 6   | 2                  | 3.20E-01 | 2                  | 3.20E-01 | 3                  | 1.79E-01 | 3                  | 1.79E-01 | 1                  | 2.90E-02 | 1                  | 2.90E-02 |
| SLC16A8   | 22  | 2                  | 1.42E-01 | 2                  | 1.42E-01 | 2                  | 1.79E-01 | 2                  | 1.79E-01 | 1                  | 2.90E-02 | 1                  | 2.90E-02 |
| SOS2      | 14  | 2                  | 5.67E-01 | 2                  | 5.67E-01 | 3                  | 1.48E-01 | 3                  | 1.48E-01 | 1                  | 2.90E-02 | 1                  | 2.90E-02 |
| ZAK       | 2   | 2                  | 5.70E-01 | 2                  | 5.70E-01 | 2                  | 1.70E-01 | 2                  | 1.70E-01 | 1                  | 2.90E-02 | 1                  | 2.90E-02 |
| ATRNL1    | 10  | 4                  | 2.46E-01 | 4                  | 2.46E-01 | 5                  | 2.94E-01 | 5                  | 2.94E-01 | 1                  | 2.91E-02 | 1                  | 2.91E-02 |
| ERBB4     | 2   | 1                  | 7.57E-01 | 1                  | 7.57E-01 | 2                  | 7.70E-02 | 2                  | 7.70E-02 | 1                  | 2.91E-02 | 1                  | 2.91E-02 |
| LIN9      | 1   | 1                  | 7.56E-01 | 1                  | 7.56E-01 | 2                  | 7.72E-02 | 2                  | 7.72E-02 | 1                  | 2.91E-02 | 1                  | 2.91E-02 |
| LMAN2     | 5   | 2                  | 5.77E-01 | 2                  | 5.77E-01 | 3                  | 1.28E-01 | 3                  | 1.28E-01 | 1                  | 2.91E-02 | 1                  | 2.91E-02 |
| NAT6      | 3   | 2                  | 5.58E-02 | 2                  | 5.58E-02 | 2                  | 1.00E+00 | 2                  | 1.00E+00 | 1                  | 2.91E-02 | 1                  | 2.91E-02 |
| RABEP1    | 17  | 2                  | 5.65E-01 | 2                  | 5.65E-01 | 3                  | 1.44E-01 | 3                  | 1.44E-01 | 1                  | 2.91E-02 | 1                  | 2.91E-02 |
| SFT2D2    | 1   | 1                  | 4.14E-01 | 1                  | 4.14E-01 | 1                  | 9.93E-02 | 1                  | 9.93E-02 | 1                  | 2.91E-02 | 1                  | 2.91E-02 |
| STBD1     | 4   | 2                  | 5.72E-01 | 2                  | 5.72E-01 | 3                  | 1.39E-01 | 3                  | 1.39E-01 | 1                  | 2.91E-02 | 1                  | 2.91E-02 |
| GALNT2    | 1   | 2                  | 5.69E-01 | 2                  | 5.69E-01 | 3                  | 1.43E-01 | 3                  | 1.43E-01 | 1                  | 2.94E-02 | 1                  | 2.94E-02 |
| LYAR      | 4   | 1                  | 4.13E-01 | 1                  | 4.13E-01 | 1                  | 1.10E-01 | 1                  | 1.10E-01 | 1                  | 2.94E-02 | 1                  | 2.94E-02 |
| SNRNP35   | 12  | 1                  | 7.45E-01 | 1                  | 7.45E-01 | 1                  | 6.01E-02 | 1                  | 6.01E-02 | 1                  | 2.94E-02 | 1                  | 2.94E-02 |
| CRMP1     | 4   | 2                  | 5.57E-01 | 2                  | 5.57E-01 | 3                  | 1.54E-01 | 3                  | 1.54E-01 | 1                  | 2.95E-02 | 1                  | 2.95E-02 |
| HELQ      | 4   | 1                  | 7.64E-01 | 1                  | 7.64E-01 | 2                  | 7.78E-02 | 2                  | 7.78E-02 | 1                  | 2.95E-02 | 1                  | 2.95E-02 |
| PHF2      | 9   | 1                  | 7.58E-01 | 1                  | 7.58E-01 | 1                  | 7.25E-02 | 1                  | 7.25E-02 | 1                  | 2.95E-02 | 1                  | 2.95E-02 |
| PRODH2    | 19  | 1                  | 7.51E-01 | 1                  | 7.51E-01 | 2                  | 7.86E-02 | 2                  | 7.86E-02 | 1                  | 2.95E-02 | 1                  | 2.95E-02 |
| REEP5     | 5   | 3                  | 3.27E-01 | 3                  | 3.27E-01 | 4                  | 2.61E-01 | 4                  | 2.61E-01 | 1                  | 2.95E-02 | 1                  | 2.95E-02 |
| ZYG11A    | 1   | 4                  | 1.25E-01 | 4                  | 1.25E-01 | 4                  | 5.47E-01 | 4                  | 5.47E-01 | 1                  | 2.95E-02 | 1                  | 2.95E-02 |
| CWC22     | 2   | 1                  | 7.50E-01 | 1                  | 7.50E-01 | 2                  | 7.38E-02 | 2                  | 7.38E-02 | 1                  | 2.96E-02 | 1                  | 2.96E-02 |
| DBI       | 2   | 1                  | 3.81E-01 | 1                  | 3.81E-01 | 1                  | 7.87E-02 | 1                  | 7.87E-02 | 1                  | 2.96E-02 | 1                  | 2.96E-02 |
| IRX6      | 16  | 2                  | 5.60E-01 | 2                  | 5.60E-01 | 3                  | 1.59E-01 | 3                  | 1.59E-01 | 1                  | 2.96E-02 | 1                  | 2.96E-02 |
| ZNF689    | 16  | 1                  | 7.52E-01 | 1                  | 7.52E-01 | 2                  | 7.85E-02 | 2                  | 7.85E-02 | 1                  | 2.96E-02 | 1                  | 2.96E-02 |
| TCOF1     | 5   | 6                  | 7.72E-01 | 6                  | 7.72E-01 | 5                  | 2.98E-02 | 5                  | 2.98E-02 | 4                  | 3.26E-02 | 4                  | 3.26E-02 |
| BPHL      | 6   | 3                  | 4.15E-01 | 3                  | 4.15E-01 | 3                  | 2.99E-02 | 3                  | 2.99E-02 | 2                  | 1.42E-01 | 2                  | 1.42E-01 |
| TRIM63    | 1   | 2                  | 6.46E-01 | 2                  | 6.46E-01 | 3                  | 3.00E-02 | 3                  | 3.00E-02 | 3                  | 6.06E-02 | 3                  | 6.06E-02 |
| CHD3      | 17  | 2                  | 5.78E-01 | 2                  | 5.78E-01 | 2                  | 1.28E-01 | 2                  | 1.28E-01 | 1                  | 3.00E-02 | 1                  | 3.00E-02 |
| PSMG1     | 21  | 1                  | 7.44E-01 | 1                  | 7.44E-01 | 1                  | 5.94E-02 | 1                  | 5.94E-02 | 1                  | 3.00E-02 | 1                  | 3.00E-02 |
| TOB1      | 17  | 1                  | 7.50E-01 | 1                  | 7.50E-01 | 1                  | 6.07E-02 | 1                  | 6.07E-02 | 1                  | 3.00E-02 | 1                  | 3.00E-02 |
| CARD14    | 17  | 6                  | 4.90E-01 | 6                  | 4.90E-01 | 6                  | 1.19E-01 | 6                  | 1.19E-01 | 2                  | 3.01E-02 | 2                  | 3.01E-02 |
| CSF3R     | 1   | 3                  | 4.17E-01 | 3                  | 4.17E-01 | 3                  | 3.01E-02 | 3                  | 3.01E-02 | 3                  | 1.13E-01 | 3                  | 1.13E-01 |
| SERPINB12 | 18  | 3                  | 3.28E-01 | 3                  | 3.28E-01 | 3                  | 2.67E-01 | 3                  | 2.67E-01 | 1                  | 3.02E-02 | 1                  | 3.02E-02 |
| CTBS      | 1   | 3                  | 3.32E-01 | 3                  | 3.32E-01 | 4                  | 1.69E-01 | 4                  | 1.69E-01 | 1                  | 3.02E-02 | 1                  | 3.02E-02 |
| TCAIM     | 3   | 2                  | 5.71E-01 | 2                  | 5.71E-01 | 3                  | 1.18E-01 | 3                  | 1.18E-01 | 1                  | 3.02E-02 | 1                  | 3.02E-02 |



| SetID    | Chr | ADEH- vs NA        |          |                    |          | ADEH+ vs ADEH-     |          |                    |          | ADEH+ vs NA        |          |                    |          |
|----------|-----|--------------------|----------|--------------------|----------|--------------------|----------|--------------------|----------|--------------------|----------|--------------------|----------|
|          |     | rarenovel          |          | all                |          | rarenovel          |          | all                |          | rarenovel          |          | all                |          |
|          |     | N variants in test | p-value  | N variants in test | p-value  | N variants in test | p-value  | N variants in test | p-value  | N variants in test | p-value  | N variants in test | p-value  |
| ICA1L    | 2   | 2                  | 5.87E-01 | 2                  | 5.87E-01 | 2                  | 1.83E-01 | 2                  | 1.83E-01 | 1                  | 3.02E-02 | 1                  | 3.02E-02 |
| CD1B     | 1   | 2                  | 3.25E-01 | 2                  | 3.25E-01 | 2                  | 2.03E-01 | 2                  | 2.03E-01 | 1                  | 3.02E-02 | 1                  | 3.02E-02 |
| FAM13C   | 10  | 3                  | 3.33E-01 | 3                  | 3.33E-01 | 4                  | 2.38E-01 | 4                  | 2.38E-01 | 1                  | 3.02E-02 | 1                  | 3.02E-02 |
| KDF1     | 1   | 2                  | 5.86E-01 | 2                  | 5.86E-01 | 3                  | 1.47E-01 | 3                  | 1.47E-01 | 1                  | 3.02E-02 | 1                  | 3.02E-02 |
| MERTK    | 2   | 1                  | 7.57E-01 | 1                  | 7.57E-01 | 2                  | 9.38E-02 | 2                  | 9.38E-02 | 1                  | 3.02E-02 | 1                  | 3.02E-02 |
| POLR1C   | 6   | 1                  | 7.19E-01 | 1                  | 7.19E-01 | 2                  | 8.32E-02 | 2                  | 8.32E-02 | 1                  | 3.02E-02 | 1                  | 3.02E-02 |
| PPP1R14A | 19  | 2                  | 7.51E-02 | 2                  | 7.51E-02 | 2                  | 1.00E+00 | 2                  | 1.00E+00 | 1                  | 3.02E-02 | 1                  | 3.02E-02 |
| CCDC90B  | 11  | 3                  | 2.96E-01 | 3                  | 2.96E-01 | 4                  | 3.06E-02 | 4                  | 3.06E-02 | 4                  | 2.99E-01 | 4                  | 2.99E-01 |
| SLITRK6  | 13  | 2                  | 5.74E-01 | 2                  | 5.74E-01 | 2                  | 1.52E-01 | 2                  | 1.52E-01 | 1                  | 3.07E-02 | 1                  | 3.07E-02 |
| XKR4     | 8   | 1                  | 7.41E-01 | 1                  | 7.41E-01 | 2                  | 7.06E-02 | 2                  | 7.06E-02 | 1                  | 3.07E-02 | 1                  | 3.07E-02 |
| ZC3H8    | 2   | 1                  | 7.53E-01 | 1                  | 7.53E-01 | 2                  | 7.41E-02 | 2                  | 7.41E-02 | 1                  | 3.07E-02 | 1                  | 3.07E-02 |
| ANKRD6   | 6   | 4                  | 1.56E-01 | 4                  | 1.56E-01 | 4                  | 4.50E-01 | 4                  | 4.50E-01 | 1                  | 3.07E-02 | 1                  | 3.07E-02 |
| ATF2     | 2   | 2                  | 5.72E-01 | 2                  | 5.72E-01 | 2                  | 1.57E-01 | 2                  | 1.57E-01 | 1                  | 3.07E-02 | 1                  | 3.07E-02 |
| BBS7     | 4   | 3                  | 3.42E-01 | 3                  | 3.42E-01 | 3                  | 2.71E-01 | 3                  | 2.71E-01 | 1                  | 3.07E-02 | 1                  | 3.07E-02 |
| BNC2     | 9   | 2                  | 5.58E-01 | 2                  | 5.58E-01 | 2                  | 1.58E-01 | 2                  | 1.58E-01 | 1                  | 3.07E-02 | 1                  | 3.07E-02 |
| CCNDBP1  | 15  | 2                  | 1.04E-01 | 2                  | 1.04E-01 | 3                  | 1.62E-01 | 3                  | 1.62E-01 | 1                  | 3.07E-02 | 1                  | 3.07E-02 |
| NICN1    | 3   | 1                  | 7.57E-01 | 1                  | 7.57E-01 | 2                  | 8.03E-02 | 2                  | 8.03E-02 | 1                  | 3.07E-02 | 1                  | 3.07E-02 |
| PDZK1IP1 | 1   | 1                  | 7.53E-01 | 1                  | 7.53E-01 | 2                  | 8.01E-02 | 2                  | 8.01E-02 | 1                  | 3.07E-02 | 1                  | 3.07E-02 |
| UBAC1    | 9   | 2                  | 2.07E-01 | 2                  | 2.07E-01 | 2                  | 3.31E-01 | 2                  | 3.31E-01 | 1                  | 3.07E-02 | 1                  | 3.07E-02 |
| AGBL1    | 15  | 12                 | 1.99E-01 | 12                 | 1.99E-01 | 11                 | 3.07E-02 | 11                 | 3.07E-02 | 4                  | 3.75E-01 | 4                  | 3.75E-01 |
| CCDC152  | 5   | 2                  | 4.57E-01 | 2                  | 4.57E-01 | 1                  | 3.09E-02 | 1                  | 3.09E-02 | 2                  | 1.54E-01 | 2                  | 1.54E-01 |
| ZSCAN1   | 19  | 1                  | 2.40E-01 | 1                  | 2.40E-01 | 1                  | 1.34E-01 | 1                  | 1.34E-01 | 1                  | 3.10E-02 | 1                  | 3.10E-02 |
| DGKQ     | 4   | 4                  | 1.84E-01 | 5                  | 3.67E-01 | 5                  | 3.62E-01 | 6                  | 3.57E-01 | 1                  | 3.13E-02 | 2                  | 3.67E-02 |
| FAM173A  | 16  | 1                  | 7.58E-01 | 1                  | 7.58E-01 | 2                  | 9.02E-02 | 2                  | 9.02E-02 | 1                  | 3.13E-02 | 1                  | 3.13E-02 |
| DLX4     | 17  | 1                  | 8.67E-02 | 1                  | 8.67E-02 | 1                  | 1.00E+00 | 1                  | 1.00E+00 | 1                  | 3.13E-02 | 1                  | 3.13E-02 |
| GLP2R    | 17  | 1                  | 7.57E-01 | 1                  | 7.57E-01 | 2                  | 8.48E-02 | 2                  | 8.48E-02 | 1                  | 3.13E-02 | 1                  | 3.13E-02 |
| HEATR3   | 16  | 2                  | 5.72E-01 | 2                  | 5.72E-01 | 3                  | 1.84E-01 | 3                  | 1.84E-01 | 1                  | 3.13E-02 | 1                  | 3.13E-02 |
| KCNS3    | 2   | 1                  | 7.60E-01 | 1                  | 7.60E-01 | 2                  | 9.17E-02 | 2                  | 9.17E-02 | 1                  | 3.13E-02 | 1                  | 3.13E-02 |
| KLHL8    | 4   | 1                  | 3.93E-01 | 1                  | 3.93E-01 | 1                  | 1.30E-01 | 1                  | 1.30E-01 | 1                  | 3.13E-02 | 1                  | 3.13E-02 |
| SYNE4    | 19  | 2                  | 5.73E-01 | 2                  | 5.73E-01 | 2                  | 2.08E-01 | 2                  | 2.08E-01 | 1                  | 3.13E-02 | 1                  | 3.13E-02 |
| FES      | 15  | 1                  | 7.37E-01 | 1                  | 7.37E-01 | 2                  | 6.40E-02 | 2                  | 6.40E-02 | 1                  | 3.14E-02 | 1                  | 3.14E-02 |
| KRT27    | 17  | 2                  | 5.62E-01 | 2                  | 5.62E-01 | 3                  | 1.47E-01 | 3                  | 1.47E-01 | 1                  | 3.14E-02 | 1                  | 3.14E-02 |
| CWC27    | 5   | 1                  | 4.21E-01 | 1                  | 4.21E-01 | 1                  | 7.63E-02 | 1                  | 7.63E-02 | 1                  | 3.16E-02 | 1                  | 3.16E-02 |
| MIPOL1   | 14  | 3                  | 2.29E-01 | 3                  | 2.29E-01 | 4                  | 2.35E-01 | 4                  | 2.35E-01 | 1                  | 3.20E-02 | 1                  | 3.20E-02 |
| CECR1    | 22  | 2                  | 5.66E-01 | 2                  | 5.66E-01 | 3                  | 1.54E-01 | 3                  | 1.54E-01 | 1                  | 3.20E-02 | 1                  | 3.20E-02 |
| AP5M1    | 14  | 1                  | 7.59E-01 | 1                  | 7.59E-01 | 2                  | 8.62E-02 | 2                  | 8.62E-02 | 1                  | 3.20E-02 | 1                  | 3.20E-02 |
| ELAC2    | 17  | 2                  | 3.49E-01 | 2                  | 3.49E-01 | 2                  | 2.10E-01 | 2                  | 2.10E-01 | 1                  | 3.20E-02 | 1                  | 3.20E-02 |
| GJB6     | 13  | 2                  | 6.91E-01 | 2                  | 6.91E-01 | 2                  | 3.20E-02 | 2                  | 3.20E-02 | 1                  | 6.58E-02 | 1                  | 6.58E-02 |
| ELN      | 7   | 2                  | 5.81E-01 | 3                  | 5.44E-01 | 2                  | 6.09E-01 | 3                  | 2.28E-01 |                    |          | 1                  | 3.25E-02 |
| RAG1     | 11  | 4                  | 4.04E-01 | 4                  | 4.04E-01 | 4                  | 4.15E-02 | 4                  | 4.15E-02 | 4                  | 3.27E-02 | 4                  | 3.27E-02 |
| WNT10A   | 2   | 6                  | 5.21E-01 | 6                  | 5.21E-01 | 7                  | 1.29E-01 | 7                  | 1.29E-01 | 4                  | 3.30E-02 | 4                  | 3.30E-02 |
| HPSE     | 4   | 4                  | 1.64E-01 | 4                  | 1.64E-01 | 4                  | 1.03E-01 | 4                  | 1.03E-01 | 2                  | 3.34E-02 | 2                  | 3.34E-02 |
| ANKRD11  | 16  | 10                 | 8.83E-01 | 10                 | 8.83E-01 | 8                  | 5.14E-02 | 8                  | 5.14E-02 | 6                  | 3.42E-02 | 6                  | 3.42E-02 |
| 2-Mar    | 1   | 1                  | 7.96E-01 | 1                  | 7.96E-01 | 1                  | 3.48E-02 | 1                  | 3.48E-02 | 1                  | 1.12E-01 | 1                  | 1.12E-01 |
| RHCG     | 15  |                    |          | 1                  | 6.28E-02 |                    |          | 1                  | 1.50E-01 |                    |          | 1                  | 3.52E-02 |
| TNFSF9   | 19  | 2                  | 4.57E-01 | 2                  | 4.57E-01 | 1                  | 3.53E-02 | 1                  | 3.53E-02 | 2                  | 1.28E-01 | 2                  | 1.28E-01 |
| EGFL8    | 6   | 2                  | 2.46E-01 | 2                  | 2.46E-01 | 2                  | 3.53E-02 | 2                  | 3.53E-02 | 1                  | 1.17E-01 | 1                  | 1.17E-01 |
| ZNF234   | 19  | 5                  | 5.61E-01 | 5                  | 5.61E-01 | 5                  | 1.00E-01 | 5                  | 1.00E-01 | 3                  | 3.54E-02 | 3                  | 3.54E-02 |

| SetID    | Chr | ADEH- vs NA        |          |                    |          | ADEH+ vs ADEH-     |          |                    |          | ADEH+ vs NA        |          |                    |          |
|----------|-----|--------------------|----------|--------------------|----------|--------------------|----------|--------------------|----------|--------------------|----------|--------------------|----------|
|          |     | rarenovel          |          | all                |          | rarenovel          |          | all                |          | rarenovel          |          | all                |          |
|          |     | N variants in test | p-value  | N variants in test | p-value  | N variants in test | p-value  | N variants in test | p-value  | N variants in test | p-value  | N variants in test | p-value  |
| ABCC11   | 16  | 8                  | 3.87E-01 | 11                 | 4.26E-01 | 7                  | 1.68E-01 | 10                 | 4.28E-02 | 5                  | 1.79E-01 | 8                  | 3.54E-02 |
| OR5111   | 11  | 2                  | 2.07E-02 | 2                  | 2.07E-02 | 2                  | 3.98E-01 | 2                  | 3.98E-01 | 2                  | 3.58E-02 | 2                  | 3.58E-02 |
| ZNF845   | 19  | 5                  | 2.54E-01 | 5                  | 2.54E-01 | 4                  | 3.60E-02 | 4                  | 3.60E-02 | 3                  | 2.37E-01 | 3                  | 2.37E-01 |
| FN3KRP   | 17  | 4                  | 1.00E+00 | 4                  | 1.00E+00 | 3                  | 3.60E-02 | 3                  | 3.60E-02 | 3                  | 4.03E-02 | 3                  | 4.03E-02 |
| ACSM3    | 16  | 7                  | 6.21E-01 | 7                  | 6.21E-01 | 5                  | 3.61E-02 | 5                  | 3.61E-02 | 4                  | 5.02E-02 | 4                  | 5.02E-02 |
| ZFHX3    | 16  | 7                  | 8.52E-01 | 7                  | 8.52E-01 | 5                  | 3.64E-02 | 5                  | 3.64E-02 | 4                  | 7.07E-02 | 4                  | 7.07E-02 |
| FANK1    | 10  | 3                  | 2.63E-01 | 3                  | 2.63E-01 | 2                  | 3.65E-02 | 2                  | 3.65E-02 | 3                  | 3.09E-01 | 3                  | 3.09E-01 |
| TRABD2A  | 2   | 2                  | 3.86E-01 | 3                  | 3.96E-01 | 2                  | 7.18E-02 | 3                  | 3.66E-02 | 2                  | 1.34E-01 | 3                  | 1.57E-01 |
| SPICE1   | 3   | 3                  | 8.71E-01 | 3                  | 8.71E-01 | 5                  | 8.43E-02 | 5                  | 8.43E-02 | 3                  | 3.67E-02 | 3                  | 3.67E-02 |
| MYOG     | 1   | 2                  | 6.45E-01 | 2                  | 6.45E-01 | 2                  | 3.68E-02 | 2                  | 3.68E-02 | 1                  | 1.00E-01 | 1                  | 1.00E-01 |
| CCDC151  | 19  | 2                  | 3.71E-01 | 2                  | 3.71E-01 | 3                  | 1.05E-01 | 3                  | 1.05E-01 | 2                  | 3.68E-02 | 2                  | 3.68E-02 |
| NDOR1    | 9   | 9                  | 3.10E-01 | 9                  | 3.10E-01 | 7                  | 3.70E-02 | 7                  | 3.70E-02 | 5                  | 3.81E-01 | 5                  | 3.81E-01 |
| MRPS9    | 2   | 2                  | 1.00E+00 | 2                  | 1.00E+00 | 3                  | 4.43E-02 | 3                  | 4.43E-02 | 2                  | 3.70E-02 | 2                  | 3.70E-02 |
| POLQ     | 3   | 6                  | 4.58E-01 | 7                  | 3.49E-01 | 4                  | 2.67E-01 | 5                  | 9.38E-02 | 3                  | 1.36E-01 | 4                  | 3.73E-02 |
| KRT77    | 12  | 2                  | 1.00E+00 | 4                  | 1.00E+00 | 2                  | 3.83E-02 | 4                  | 3.83E-02 | 2                  | 3.89E-02 | 4                  | 3.89E-02 |
| ZNF732   | 4   | 7                  | 3.48E-02 | 7                  | 3.48E-02 | 6                  | 3.83E-02 | 6                  | 3.83E-02 | 5                  | 4.85E-01 | 5                  | 4.85E-01 |
| PZP      | 12  | 7                  | 1.93E-01 | 9                  | 1.78E-01 | 8                  | 1.86E-01 | 10                 | 1.86E-01 | 4                  | 3.96E-02 | 6                  | 3.84E-02 |
| MS4A12   | 11  |                    |          | 1                  | 1.47E-02 |                    |          | 1                  | 3.84E-02 |                    |          | 1                  | 4.81E-01 |
| DPP10    | 2   | 1                  | 1.00E+00 | 1                  | 1.00E+00 | 1                  | 3.85E-02 | 1                  | 3.85E-02 | 1                  | 6.93E-02 | 1                  | 6.93E-02 |
| VCAN     | 5   | 7                  | 7.90E-02 | 9                  | 1.15E-01 | 5                  | 3.89E-02 | 7                  | 5.00E-02 | 7                  | 3.60E-01 | 9                  | 3.94E-01 |
| TEX19    | 17  | 1                  | 5.88E-01 | 1                  | 5.88E-01 | 1                  | 3.95E-02 | 1                  | 3.95E-02 | 1                  | 3.91E-02 | 1                  | 3.91E-02 |
| ASB18    | 2   | 1                  | 1.80E-01 | 2                  | 2.06E-01 | 1                  | 1.00E+00 | 2                  | 3.78E-01 |                    |          | 1                  | 3.91E-02 |
| CCDC81   | 11  | 3                  | 3.52E-02 | 3                  | 3.52E-02 | 4                  | 3.58E-01 | 4                  | 3.58E-01 | 2                  | 3.91E-02 | 2                  | 3.91E-02 |
| SLC8A3   | 14  | 4                  | 8.15E-01 | 4                  | 8.15E-01 | 5                  | 4.02E-02 | 5                  | 4.02E-02 | 2                  | 3.93E-02 | 2                  | 3.93E-02 |
| SLC22A14 | 3   | 4                  | 1.64E-01 | 4                  | 1.64E-01 | 2                  | 3.96E-02 | 2                  | 3.96E-02 | 3                  | 2.30E-01 | 3                  | 2.30E-01 |
| MYO5A    | 15  | 1                  | 8.32E-02 | 2                  | 8.52E-02 |                    |          | 1                  | 3.98E-02 | 1                  | 6.34E-01 | 2                  | 6.79E-01 |
| CIAPIN1  | 16  | 1                  | 6.57E-01 | 1                  | 6.57E-01 | 1                  | 5.31E-02 | 1                  | 5.31E-02 | 1                  | 3.98E-02 | 1                  | 3.98E-02 |
| PKP3     | 11  | 10                 | 2.73E-01 | 10                 | 2.73E-01 | 9                  | 4.00E-02 | 9                  | 4.00E-02 | 8                  | 4.26E-02 | 8                  | 4.26E-02 |
| MRPL57   | 13  | 2                  | 6.38E-01 | 2                  | 6.38E-01 | 2                  | 1.19E-01 | 2                  | 1.19E-01 | 2                  | 4.10E-02 | 2                  | 4.10E-02 |
| FBF1     | 17  | 8                  | 4.71E-01 | 8                  | 4.71E-01 | 6                  | 4.13E-02 | 6                  | 4.13E-02 | 4                  | 1.05E-01 | 4                  | 1.05E-01 |
| ADAMTS4  | 1   | 3                  | 2.89E-01 | 3                  | 2.89E-01 | 3                  | 1.62E-01 | 3                  | 1.62E-01 | 2                  | 4.27E-02 | 2                  | 4.27E-02 |
| MSH6     | 2   | 4                  | 7.76E-01 | 4                  | 7.76E-01 | 5                  | 7.80E-02 | 5                  | 7.80E-02 | 2                  | 4.30E-02 | 2                  | 4.30E-02 |
| CEP162   | 6   | 7                  | 5.71E-01 | 7                  | 5.71E-01 | 7                  | 1.18E-01 | 7                  | 1.18E-01 | 6                  | 4.30E-02 | 6                  | 4.30E-02 |
| DNAAF5   | 7   | 3                  | 6.92E-01 | 3                  | 6.92E-01 | 4                  | 7.69E-02 | 4                  | 7.69E-02 | 2                  | 4.31E-02 | 2                  | 4.31E-02 |
| OR6B1    | 7   | 1                  | 6.91E-01 | 1                  | 6.91E-01 | 1                  | 4.32E-02 | 1                  | 4.32E-02 | 1                  | 1.52E-01 | 1                  | 1.52E-01 |
| CACHD1   | 1   | 6                  | 4.53E-01 | 6                  | 4.53E-01 | 7                  | 9.73E-02 | 7                  | 9.73E-02 | 2                  | 4.32E-02 | 2                  | 4.32E-02 |
| UBR3     | 2   | 4                  | 4.74E-01 | 4                  | 4.74E-01 | 3                  | 4.33E-02 | 3                  | 4.33E-02 | 2                  | 2.15E-01 | 2                  | 2.15E-01 |
| RD3      | 1   | 3                  | 4.08E-01 | 3                  | 4.08E-01 | 2                  | 1.20E-01 | 2                  | 1.20E-01 | 2                  | 4.37E-02 | 2                  | 4.37E-02 |
| ZNF680   | 7   | 2                  | 7.33E-01 | 2                  | 7.33E-01 | 3                  | 4.38E-02 | 3                  | 4.38E-02 | 2                  | 8.45E-02 | 2                  | 8.45E-02 |
| MYH7     | 14  | 7                  | 1.00E+00 | 7                  | 1.00E+00 | 9                  | 4.42E-02 | 9                  | 4.42E-02 | 5                  | 4.75E-02 | 5                  | 4.75E-02 |
| SCIN     | 7   | 6                  | 3.65E-01 | 6                  | 3.65E-01 | 5                  | 1.31E-01 | 5                  | 1.31E-01 | 4                  | 4.45E-02 | 4                  | 4.45E-02 |
| CD300LF  | 17  | 4                  | 4.65E-01 | 4                  | 4.65E-01 | 4                  | 1.67E-01 | 4                  | 1.67E-01 | 2                  | 4.45E-02 | 2                  | 4.45E-02 |
| KDM1A    | 1   | 1                  | 4.08E-01 | 1                  | 4.08E-01 | 1                  | 1.06E-01 | 1                  | 1.06E-01 | 1                  | 4.50E-02 | 1                  | 4.50E-02 |
| SFMBT2   | 10  | 4                  | 7.72E-01 | 4                  | 7.72E-01 | 5                  | 6.24E-02 | 5                  | 6.24E-02 | 2                  | 4.50E-02 | 2                  | 4.50E-02 |
| THEG     | 19  | 2                  | 6.84E-02 | 3                  | 1.78E-02 | 2                  | 3.30E-01 | 3                  | 4.81E-01 | 2                  | 4.60E-02 | 3                  | 2.63E-01 |
| WDR46    | 6   | 2                  | 2.56E-02 | 3                  | 3.90E-02 |                    |          | 1                  | 4.61E-02 | 2                  | 6.37E-01 | 3                  | 8.66E-01 |
| JMY      | 5   | 4                  | 1.00E+00 | 4                  | 1.00E+00 | 4                  | 5.47E-02 | 4                  | 5.47E-02 | 2                  | 4.62E-02 | 2                  | 4.62E-02 |
| SLC2A9   | 4   | 2                  | 5.62E-01 | 3                  | 5.63E-01 | 2                  | 1.10E-01 | 3                  | 1.15E-01 | 1                  | 4.71E-02 | 2                  | 4.75E-02 |

| SetID    | Chr | ADEH- vs NA        |          |                    |          | ADEH+ vs ADEH-     |          |                    |          | ADEH+ vs NA        |          |                    |          |
|----------|-----|--------------------|----------|--------------------|----------|--------------------|----------|--------------------|----------|--------------------|----------|--------------------|----------|
|          |     | rarenovel          |          | all                |          | rarenovel          |          | all                |          | rarenovel          |          | all                |          |
|          |     | N variants in test | p-value  | N variants in test | p-value  | N variants in test | p-value  | N variants in test | p-value  | N variants in test | p-value  | N variants in test | p-value  |
| ZDHHC4   | 7   | 1                  | 7.03E-01 | 1                  | 7.03E-01 | 1                  | 4.73E-02 | 1                  | 4.73E-02 | 1                  | 5.74E-02 | 1                  | 5.74E-02 |
| ARMC10   | 7   | 1                  | 1.76E-01 | 1                  | 1.76E-01 | 1                  | 4.79E-02 | 1                  | 4.79E-02 | 1                  | 2.93E-01 | 1                  | 2.93E-01 |
| TTC4     | 1   | 3                  | 1.28E-01 | 3                  | 1.28E-01 | 1                  | 4.80E-02 | 1                  | 4.80E-02 | 3                  | 2.93E-01 | 3                  | 2.93E-01 |
| BCL11A   | 2   | 1                  | 7.25E-01 | 1                  | 7.25E-01 | 1                  | 4.81E-02 | 1                  | 4.81E-02 | 1                  | 1.24E-01 | 1                  | 1.24E-01 |
| TBC1D5   | 3   | 4                  | 6.75E-01 | 4                  | 6.75E-01 | 3                  | 7.67E-02 | 3                  | 7.67E-02 | 3                  | 4.82E-02 | 3                  | 4.82E-02 |
| APPL2    | 12  | 5                  | 5.47E-01 | 5                  | 5.47E-01 | 4                  | 4.82E-02 | 4                  | 4.82E-02 | 4                  | 2.41E-01 | 4                  | 2.41E-01 |
| HEG1     | 3   | 5                  | 2.43E-01 | 5                  | 2.43E-01 | 3                  | 4.84E-02 | 3                  | 4.84E-02 | 5                  | 1.35E-01 | 5                  | 1.35E-01 |
| S100Z    | 5   |                    |          | 1                  | 9.31E-02 |                    |          | 1                  | 1.45E-01 |                    |          | 1                  | 4.88E-02 |
| SOX4     | 6   | 3                  | 1.04E-02 | 3                  | 1.04E-02 | 3                  | 1.79E-01 | 3                  | 1.79E-01 | 2                  | 4.91E-02 | 2                  | 4.91E-02 |
| PPARGC1B | 5   | 6                  | 3.53E-01 | 6                  | 3.53E-01 | 5                  | 2.11E-01 | 5                  | 2.11E-01 | 4                  | 4.95E-02 | 4                  | 4.95E-02 |
| SH2D5    | 1   | 3                  | 4.44E-01 | 3                  | 4.44E-01 | 1                  | 5.00E-02 | 1                  | 5.00E-02 | 3                  | 6.95E-02 | 3                  | 6.95E-02 |
| SAMD7    | 3   | 1                  | 7.50E-01 | 2                  | 5.71E-02 | 1                  | 4.80E-01 | 2                  | 4.45E-01 |                    |          | 1                  | 5.01E-02 |
| NUP93    | 16  | 2                  | 4.45E-01 | 2                  | 4.45E-01 | 1                  | 5.04E-02 | 1                  | 5.04E-02 | 2                  | 1.03E-01 | 2                  | 1.03E-01 |
| ADPRH    | 3   | 4                  | 5.82E-01 | 4                  | 5.82E-01 | 3                  | 1.20E-01 | 3                  | 1.20E-01 | 2                  | 5.05E-02 | 2                  | 5.05E-02 |
| SPINT1   | 15  | 4                  | 6.89E-01 | 4                  | 6.89E-01 | 3                  | 5.05E-02 | 3                  | 5.05E-02 | 3                  | 1.77E-01 | 3                  | 1.77E-01 |
| TMEM207  | 3   |                    |          | 1                  | 2.57E-01 |                    |          | 1                  | 1.37E-01 |                    |          | 1                  | 5.05E-02 |
| FLYWCH1  | 16  | 3                  | 6.73E-01 | 3                  | 6.73E-01 | 3                  | 5.07E-02 | 3                  | 5.07E-02 | 3                  | 1.19E-01 | 3                  | 1.19E-01 |
| GDF9     | 5   | 4                  | 1.72E-01 | 4                  | 1.72E-01 | 4                  | 5.07E-02 | 4                  | 5.07E-02 | 3                  | 1.54E-01 | 3                  | 1.54E-01 |
| CLK4     | 5   | 2                  | 1.68E-02 | 2                  | 1.68E-02 | 1                  | 5.08E-02 | 1                  | 5.08E-02 | 2                  | 8.08E-01 | 2                  | 8.08E-01 |
| CCDC85A  | 2   |                    |          | 2                  | 6.21E-01 |                    |          | 2                  | 7.26E-02 |                    |          | 2                  | 5.10E-02 |
| MEX3D    | 19  | 2                  | 5.76E-02 | 2                  | 5.76E-02 | 3                  | 5.12E-02 | 3                  | 5.12E-02 | 3                  | 5.34E-01 | 3                  | 5.34E-01 |
| ESR1     | 6   | 3                  | 4.24E-01 | 3                  | 4.24E-01 | 2                  | 5.14E-02 | 2                  | 5.14E-02 | 3                  | 1.81E-01 | 3                  | 1.81E-01 |
| PLEKHA4  | 19  | 6                  | 7.45E-01 | 6                  | 7.45E-01 | 5                  | 5.15E-02 | 5                  | 5.15E-02 | 6                  | 6.84E-02 | 6                  | 6.84E-02 |
| KIF2B    | 17  | 2                  | 5.49E-01 | 2                  | 5.49E-01 | 4                  | 5.19E-02 | 4                  | 5.19E-02 | 3                  | 1.13E-01 | 3                  | 1.13E-01 |
| C2CD4B   | 15  | 2                  | 6.78E-02 | 3                  | 6.75E-02 | 2                  | 5.21E-02 | 3                  | 5.98E-02 | 2                  | 1.70E-01 | 3                  | 2.09E-01 |
| ABHD12B  | 14  | 2                  | 6.03E-01 | 2                  | 6.03E-01 | 2                  | 1.04E-01 | 2                  | 1.04E-01 | 1                  | 5.25E-02 | 1                  | 5.25E-02 |
| ARRDC1   | 9   | 3                  | 5.89E-01 | 4                  | 5.93E-01 | 2                  | 8.57E-02 | 3                  | 9.10E-02 | 2                  | 5.25E-02 | 3                  | 6.41E-02 |
| FIGNL1   | 7   | 4                  | 2.30E-01 | 4                  | 2.30E-01 | 4                  | 3.83E-01 | 4                  | 3.83E-01 | 1                  | 5.26E-02 | 1                  | 5.26E-02 |
| GAB2     | 11  | 2                  | 2.23E-01 | 2                  | 2.23E-01 | 3                  | 5.27E-02 | 3                  | 5.27E-02 | 2                  | 1.76E-01 | 2                  | 1.76E-01 |
| TENM3    | 4   | 5                  | 9.10E-01 | 5                  | 9.10E-01 | 6                  | 8.19E-02 | 6                  | 8.19E-02 | 4                  | 5.36E-02 | 4                  | 5.36E-02 |
| ANO8     | 19  | 2                  | 2.34E-01 | 2                  | 2.34E-01 | 2                  | 5.38E-02 | 2                  | 5.38E-02 | 2                  | 1.05E-01 | 2                  | 1.05E-01 |
| DNAH14   | 1   | 18                 | 8.85E-01 | 18                 | 8.85E-01 | 16                 | 5.40E-02 | 16                 | 5.40E-02 | 9                  | 1.12E-01 | 9                  | 1.12E-01 |
| FAM83H   | 8   | 7                  | 8.19E-03 | 9                  | 1.86E-02 | 3                  | 5.43E-02 | 5                  | 6.85E-02 | 5                  | 8.83E-01 | 7                  | 8.48E-01 |
| UBE3D    | 6   | 1                  | 2.10E-01 | 1                  | 2.10E-01 | 1                  | 5.43E-02 | 1                  | 5.43E-02 | 1                  | 3.10E-01 | 1                  | 3.10E-01 |
| GP2      | 16  | 3                  | 1.00E+00 | 3                  | 1.00E+00 | 3                  | 5.46E-02 | 3                  | 5.46E-02 | 1                  | 5.45E-02 | 1                  | 5.45E-02 |
| TAS2R50  | 12  | 1                  | 7.26E-01 | 1                  | 7.26E-01 | 2                  | 5.46E-02 | 2                  | 5.46E-02 | 2                  | 1.20E-01 | 2                  | 1.20E-01 |
| PLCD4    | 2   | 3                  | 3.96E-01 | 3                  | 3.96E-01 | 3                  | 2.22E-01 | 3                  | 2.22E-01 | 2                  | 5.47E-02 | 2                  | 5.47E-02 |
| SLC26A1  | 4   | 9                  | 3.15E-01 | 9                  | 3.15E-01 | 9                  | 1.33E-01 | 9                  | 1.33E-01 | 3                  | 5.52E-02 | 3                  | 5.52E-02 |
| SOX8     | 16  | 2                  | 1.00E+00 | 2                  | 1.00E+00 | 2                  | 5.52E-02 | 2                  | 5.52E-02 | 1                  | 6.61E-02 | 1                  | 6.61E-02 |
| CD5      | 11  | 1                  | 5.57E-02 | 2                  | 5.57E-02 | 1                  | 5.55E-02 | 2                  | 5.54E-02 | 1                  | 1.00E+00 | 2                  | 1.00E+00 |
| ZNF675   | 19  | 2                  | 3.92E-01 | 2                  | 3.92E-01 | 2                  | 5.55E-02 | 2                  | 5.55E-02 | 2                  | 1.18E-01 | 2                  | 1.18E-01 |
| ITLN2    | 1   | 1                  | 7.76E-01 | 1                  | 7.76E-01 | 1                  | 5.56E-02 | 1                  | 5.56E-02 | 1                  | 9.85E-02 | 1                  | 9.85E-02 |
| PEX13    | 2   | 1                  | 7.01E-01 | 1                  | 7.01E-01 | 1                  | 5.60E-02 | 1                  | 5.60E-02 | 1                  | 2.50E-01 | 1                  | 2.50E-01 |
| GTF2E1   | 3   | 3                  | 1.73E-01 | 3                  | 1.73E-01 | 3                  | 5.61E-02 | 3                  | 5.61E-02 | 2                  | 3.47E-01 | 2                  | 3.47E-01 |
| RSC1A1   | 1   | 2                  | 7.16E-02 | 2                  | 7.16E-02 | 2                  | 5.65E-02 | 2                  | 5.65E-02 | 3                  | 2.71E-01 | 3                  | 2.71E-01 |
| TMPO     | 12  | 2                  | 4.88E-01 | 2                  | 4.88E-01 | 1                  | 5.66E-02 | 1                  | 5.66E-02 | 2                  | 1.08E-01 | 2                  | 1.08E-01 |
| RUSC2    | 9   | 7                  | 7.35E-01 | 7                  | 7.35E-01 | 7                  | 7.60E-02 | 7                  | 7.60E-02 | 4                  | 5.68E-02 | 4                  | 5.68E-02 |
| SORBS1   | 10  | 9                  | 2.74E-01 | 9                  | 2.74E-01 | 8                  | 2.39E-01 | 8                  | 2.39E-01 | 4                  | 5.68E-02 | 4                  | 5.68E-02 |

| SetID      | Chr | ADEH- vs NA        |          |                    |          | ADEH+ vs ADEH-     |          |                    |          | ADEH+ vs NA        |          |                    |          |
|------------|-----|--------------------|----------|--------------------|----------|--------------------|----------|--------------------|----------|--------------------|----------|--------------------|----------|
|            |     | rarenovel          |          | all                |          | rarenovel          |          | all                |          | rarenovel          |          | all                |          |
|            |     | N variants in test | p-value  | N variants in test | p-value  | N variants in test | p-value  | N variants in test | p-value  | N variants in test | p-value  | N variants in test | p-value  |
| OR5D14     | 11  | 2                  | 4.45E-01 | 2                  | 4.45E-01 | 1                  | 5.68E-02 | 1                  | 5.68E-02 | 2                  | 1.65E-01 | 2                  | 1.65E-01 |
| MAP4K5     | 14  | 4                  | 3.74E-01 | 4                  | 3.74E-01 | 2                  | 7.77E-02 | 2                  | 7.77E-02 | 4                  | 5.71E-02 | 4                  | 5.71E-02 |
| BCL2L14    | 12  | 2                  | 6.01E-01 | 2                  | 6.01E-01 | 2                  | 5.72E-02 | 2                  | 5.72E-02 | 2                  | 7.51E-02 | 2                  | 7.51E-02 |
| OR51B2     | 11  |                    |          | 1                  | 4.69E-01 |                    |          | 1                  | 5.73E-02 |                    |          | 1                  | 1.42E-01 |
| MCM3       | 6   | 4                  | 1.33E-01 | 4                  | 1.33E-01 | 3                  | 4.68E-01 | 3                  | 4.68E-01 | 2                  | 5.74E-02 | 2                  | 5.74E-02 |
| UBE2T      | 1   | 1                  | 7.11E-01 | 1                  | 7.11E-01 | 1                  | 5.74E-02 | 1                  | 5.74E-02 | 1                  | 1.64E-01 | 1                  | 1.64E-01 |
| BCO1       | 16  | 4                  | 7.20E-01 | 4                  | 7.20E-01 | 3                  | 5.75E-02 | 3                  | 5.75E-02 | 4                  | 8.98E-02 | 4                  | 8.98E-02 |
| NLE1       | 17  | 3                  | 1.00E+00 | 3                  | 1.00E+00 | 4                  | 5.76E-02 | 4                  | 5.76E-02 | 3                  | 8.70E-02 | 3                  | 8.70E-02 |
| TMEM19     | 12  | 3                  | 2.32E-01 | 3                  | 2.32E-01 | 2                  | 5.76E-02 | 2                  | 5.76E-02 | 2                  | 3.54E-01 | 2                  | 3.54E-01 |
| OR52N2     | 11  | 2                  | 4.36E-01 | 3                  | 4.36E-01 | 2                  | 1.98E-01 | 3                  | 1.98E-01 | 1                  | 5.76E-02 | 2                  | 5.77E-02 |
| SP100      | 2   | 3                  | 1.32E-01 | 3                  | 1.32E-01 | 1                  | 5.79E-02 | 1                  | 5.79E-02 | 3                  | 2.67E-01 | 3                  | 2.67E-01 |
| KDM1B      | 6   | 1                  | 2.44E-01 | 1                  | 2.44E-01 | 1                  | 5.81E-02 | 1                  | 5.81E-02 | 1                  | 2.11E-01 | 1                  | 2.11E-01 |
| GEMIN5     | 5   | 6                  | 6.11E-01 | 6                  | 6.11E-01 | 4                  | 5.81E-02 | 4                  | 5.81E-02 | 6                  | 1.13E-01 | 6                  | 1.13E-01 |
| AAR2       | 20  | 2                  | 4.69E-01 | 2                  | 4.69E-01 | 2                  | 5.82E-02 | 2                  | 5.82E-02 | 1                  | 8.13E-02 | 1                  | 8.13E-02 |
| RTBDN      | 19  | 1                  | 8.25E-01 | 1                  | 8.25E-01 | 1                  | 5.82E-02 | 1                  | 5.82E-02 | 1                  | 9.69E-02 | 1                  | 9.69E-02 |
| ODF4       | 17  |                    |          | 1                  | 8.26E-01 |                    |          | 1                  | 5.83E-02 |                    |          | 1                  | 9.78E-02 |
| OC90       | 8   | 3                  | 1.64E-01 | 3                  | 1.64E-01 | 2                  | 5.83E-02 | 2                  | 5.83E-02 | 3                  | 4.65E-01 | 3                  | 4.65E-01 |
| PADI4      | 1   | 8                  | 5.63E-01 | 8                  | 5.63E-01 | 8                  | 6.08E-02 | 8                  | 6.08E-02 | 4                  | 5.83E-02 | 4                  | 5.83E-02 |
| ZNF461     | 19  | 2                  | 4.35E-01 | 2                  | 4.35E-01 | 2                  | 5.84E-02 | 2                  | 5.84E-02 | 2                  | 1.38E-01 | 2                  | 1.38E-01 |
| DFNA5      | 7   |                    |          | 1                  | 2.67E-01 |                    |          | 1                  | 1.45E-01 |                    |          | 1                  | 5.84E-02 |
| TAF1B      | 2   | 2                  | 1.55E-02 | 3                  | 2.70E-02 |                    |          | 1                  | 5.87E-02 | 2                  | 6.43E-01 | 3                  | 3.07E-01 |
| NT5M       | 17  | 2                  | 2.48E-02 | 2                  | 2.48E-02 | 1                  | 5.89E-02 | 1                  | 5.89E-02 | 2                  | 1.00E+00 | 2                  | 1.00E+00 |
| MSRB2      | 10  | 1                  | 6.96E-01 | 1                  | 6.96E-01 | 2                  | 5.89E-02 | 2                  | 5.89E-02 | 2                  | 1.17E-01 | 2                  | 1.17E-01 |
| HIST1H1B   | 6   | 1                  | 1.89E-01 | 1                  | 1.89E-01 | 1                  | 5.90E-02 | 1                  | 5.90E-02 | 1                  | 4.04E-01 | 1                  | 4.04E-01 |
| TK2        | 16  | 1                  | 4.11E-01 | 1                  | 4.11E-01 | 1                  | 2.19E-01 | 1                  | 2.19E-01 | 1                  | 5.90E-02 | 1                  | 5.90E-02 |
| CFDP1      | 16  | 2                  | 6.26E-02 | 2                  | 6.26E-02 | 1                  | 5.90E-02 | 1                  | 5.90E-02 | 2                  | 7.71E-01 | 2                  | 7.71E-01 |
| CD22       | 19  | 4                  | 1.25E-01 | 4                  | 1.25E-01 | 3                  | 6.24E-01 | 3                  | 6.24E-01 | 2                  | 5.92E-02 | 2                  | 5.92E-02 |
| OSGIN1     | 16  | 4                  | 5.19E-01 | 4                  | 5.19E-01 | 4                  | 5.92E-02 | 4                  | 5.92E-02 | 3                  | 1.21E-01 | 3                  | 1.21E-01 |
| ZBTB42     | 14  | 1                  | 7.53E-01 | 2                  | 2.10E-01 | 1                  | 5.66E-01 | 2                  | 4.01E-01 |                    |          | 1                  | 5.93E-02 |
| CYP8B1     | 3   | 4                  | 3.16E-01 | 4                  | 3.16E-01 | 3                  | 5.93E-02 | 3                  | 5.93E-02 | 4                  | 8.09E-02 | 4                  | 8.09E-02 |
| LRR1       | 14  | 1                  | 7.07E-01 | 1                  | 7.07E-01 | 2                  | 5.94E-02 | 2                  | 5.94E-02 | 2                  | 9.31E-02 | 2                  | 9.31E-02 |
| SNAPC4     | 9   | 8                  | 8.80E-01 | 8                  | 8.80E-01 | 8                  | 1.23E-01 | 8                  | 1.23E-01 | 4                  | 5.97E-02 | 4                  | 5.97E-02 |
| TTF2       | 1   | 8                  | 5.25E-01 | 8                  | 5.25E-01 | 4                  | 8.77E-02 | 4                  | 8.77E-02 | 7                  | 5.98E-02 | 7                  | 5.98E-02 |
| OR2A5      | 7   |                    |          | 1                  | 3.04E-01 |                    |          | 1                  | 1.24E-01 |                    |          | 1                  | 5.98E-02 |
| ANKRD26    | 10  | 8                  | 3.12E-01 | 8                  | 3.12E-01 | 5                  | 5.99E-02 | 5                  | 5.99E-02 | 6                  | 1.12E-01 | 6                  | 1.12E-01 |
| CLSTN2     | 3   | 2                  | 1.00E+00 | 2                  | 1.00E+00 | 2                  | 8.32E-02 | 2                  | 8.32E-02 | 1                  | 5.99E-02 | 1                  | 5.99E-02 |
| MDP1       | 14  | 2                  | 8.70E-01 | 2                  | 8.70E-01 | 1                  | 6.00E-02 | 1                  | 6.00E-02 | 2                  | 1.54E-01 | 2                  | 1.54E-01 |
| NEDD8-MDP1 | 14  | 2                  | 8.70E-01 | 2                  | 8.70E-01 | 1                  | 6.00E-02 | 1                  | 6.00E-02 | 2                  | 1.54E-01 | 2                  | 1.54E-01 |
| WDR3       | 1   | 4                  | 4.16E-02 | 4                  | 4.16E-02 | 2                  | 6.01E-02 | 2                  | 6.01E-02 | 4                  | 3.77E-01 | 4                  | 3.77E-01 |
| CYP27A1    | 2   | 5                  | 7.77E-01 | 5                  | 7.77E-01 | 6                  | 1.15E-01 | 6                  | 1.15E-01 | 3                  | 6.01E-02 | 3                  | 6.01E-02 |
| RIN1       | 11  | 5                  | 8.52E-01 | 6                  | 6.53E-01 | 4                  | 7.05E-02 | 5                  | 9.97E-02 | 2                  | 6.01E-02 | 3                  | 6.61E-02 |
| MTBP       | 8   | 1                  | 7.36E-01 | 1                  | 7.36E-01 | 1                  | 6.01E-02 | 1                  | 6.01E-02 | 1                  | 1.49E-01 | 1                  | 1.49E-01 |
| ADH1A      | 4   | 2                  | 3.66E-01 | 2                  | 3.66E-01 | 2                  | 6.01E-02 | 2                  | 6.01E-02 | 2                  | 1.57E-01 | 2                  | 1.57E-01 |
| OR6C68     | 12  | 3                  | 7.28E-03 | 4                  | 7.34E-03 | 2                  | 6.02E-02 | 3                  | 6.02E-02 | 4                  | 3.16E-01 | 5                  | 3.16E-01 |
| PIP5K1C    | 19  | 1                  | 7.34E-01 | 1                  | 7.34E-01 | 1                  | 6.02E-02 | 1                  | 6.02E-02 | 1                  | 1.58E-01 | 1                  | 1.58E-01 |
| TECRL      | 4   | 1                  | 7.06E-02 | 1                  | 7.06E-02 | 1                  | 6.04E-02 | 1                  | 6.04E-02 | 1                  | 1.00E+00 | 1                  | 1.00E+00 |
| ZBTB25     | 14  | 2                  | 3.95E-01 | 2                  | 3.95E-01 | 2                  | 6.05E-02 | 2                  | 6.05E-02 | 1                  | 1.67E-01 | 1                  | 1.67E-01 |
| ADSS       | 1   | 2                  | 5.05E-01 | 2                  | 5.05E-01 | 1                  | 6.06E-02 | 1                  | 6.06E-02 | 2                  | 1.64E-01 | 2                  | 1.64E-01 |

| SetID    | Chr | ADEH- vs NA        |          |                    |          | ADEH+ vs ADEH-     |          |                    |          | ADEH+ vs NA        |          |                    |          |
|----------|-----|--------------------|----------|--------------------|----------|--------------------|----------|--------------------|----------|--------------------|----------|--------------------|----------|
|          |     | rarenovel          |          | all                |          | rarenovel          |          | all                |          | rarenovel          |          | all                |          |
|          |     | N variants in test | p-value  | N variants in test | p-value  | N variants in test | p-value  | N variants in test | p-value  | N variants in test | p-value  | N variants in test | p-value  |
| ACKR1    | 1   | 1                  | 1.91E-01 | 1                  | 1.91E-01 | 1                  | 6.07E-02 | 1                  | 6.07E-02 | 1                  | 3.87E-01 | 1                  | 3.87E-01 |
| RPGRI11  | 16  | 3                  | 1.50E-01 | 3                  | 1.50E-01 | 2                  | 6.08E-02 | 2                  | 6.08E-02 | 3                  | 3.81E-01 | 3                  | 3.81E-01 |
| RPS6KA5  | 14  | 2                  | 3.20E-02 | 2                  | 3.20E-02 | 2                  | 6.09E-02 | 2                  | 6.09E-02 | 1                  | 3.62E-01 | 1                  | 3.62E-01 |
| ANO6     | 12  | 3                  | 9.71E-02 | 3                  | 9.71E-02 | 2                  | 6.10E-02 | 2                  | 6.10E-02 | 3                  | 2.00E-01 | 3                  | 2.00E-01 |
| OR2M4    | 1   | 1                  | 8.10E-01 | 1                  | 8.10E-01 | 1                  | 6.10E-02 | 1                  | 6.10E-02 | 1                  | 1.08E-01 | 1                  | 1.08E-01 |
| BMS1     | 10  | 1                  | 2.39E-03 | 1                  | 2.39E-03 | 1                  | 6.11E-02 | 1                  | 6.11E-02 | 1                  | 1.00E+00 | 1                  | 1.00E+00 |
| ELMOD3   | 2   | 3                  | 1.66E-01 | 3                  | 1.66E-01 | 2                  | 6.11E-02 | 2                  | 6.11E-02 | 3                  | 2.52E-01 | 3                  | 2.52E-01 |
| DCANP1   | 5   |                    |          | 1                  | 8.07E-01 |                    |          | 1                  | 6.12E-02 |                    |          | 1                  | 1.05E-01 |
| KCNT1    | 9   | 4                  | 8.29E-01 | 4                  | 8.29E-01 | 4                  | 6.13E-02 | 4                  | 6.13E-02 | 2                  | 7.02E-02 | 2                  | 7.02E-02 |
| IFT52    | 20  | 2                  | 2.88E-01 | 2                  | 2.88E-01 | 2                  | 6.13E-02 | 2                  | 6.13E-02 | 3                  | 3.08E-01 | 3                  | 3.08E-01 |
| SETBP1   | 18  | 1                  | 7.12E-01 | 1                  | 7.12E-01 | 2                  | 6.13E-02 | 2                  | 6.13E-02 | 2                  | 1.01E-01 | 2                  | 1.01E-01 |
| SPP1     | 4   | 2                  | 3.65E-01 | 2                  | 3.65E-01 | 2                  | 6.14E-02 | 2                  | 6.14E-02 | 1                  | 1.31E-01 | 1                  | 1.31E-01 |
| LDAH     | 2   | 2                  | 3.28E-01 | 2                  | 3.28E-01 | 2                  | 6.15E-02 | 2                  | 6.15E-02 | 2                  | 1.24E-01 | 2                  | 1.24E-01 |
| KRT24    | 17  | 2                  | 3.51E-01 | 2                  | 3.51E-01 | 2                  | 6.17E-02 | 2                  | 6.17E-02 | 2                  | 1.29E-01 | 2                  | 1.29E-01 |
| KIAA0922 | 4   | 4                  | 7.17E-01 | 4                  | 7.17E-01 | 4                  | 6.18E-02 | 4                  | 6.18E-02 | 3                  | 7.12E-02 | 3                  | 7.12E-02 |
| COL1A2   | 7   | 5                  | 5.01E-03 | 5                  | 5.01E-03 | 2                  | 6.20E-02 | 2                  | 6.20E-02 | 5                  | 5.51E-01 | 5                  | 5.51E-01 |
| SIGLEC9  | 19  | 3                  | 9.33E-02 | 3                  | 9.33E-02 | 2                  | 6.22E-02 | 2                  | 6.22E-02 | 3                  | 2.51E-01 | 3                  | 2.51E-01 |
| MYO6     | 6   | 5                  | 6.26E-01 | 5                  | 6.26E-01 | 5                  | 2.07E-01 | 5                  | 2.07E-01 | 6                  | 6.23E-02 | 6                  | 6.23E-02 |
| CDCA7    | 2   | 1                  | 7.13E-01 | 1                  | 7.13E-01 | 2                  | 6.23E-02 | 2                  | 6.23E-02 | 2                  | 1.19E-01 | 2                  | 1.19E-01 |
| INO80    | 15  | 2                  | 2.57E-01 | 2                  | 2.57E-01 | 2                  | 6.24E-02 | 2                  | 6.24E-02 | 3                  | 2.70E-01 | 3                  | 2.70E-01 |
| PLXNA1   | 3   | 2                  | 4.15E-01 | 2                  | 4.15E-01 | 2                  | 6.25E-02 | 2                  | 6.25E-02 | 2                  | 1.28E-01 | 2                  | 1.28E-01 |
| CDC25B   | 20  | 2                  | 4.68E-01 | 2                  | 4.68E-01 | 2                  | 6.25E-02 | 2                  | 6.25E-02 | 2                  | 1.07E-01 | 2                  | 1.07E-01 |
| GPR146   | 7   | 4                  | 5.37E-02 | 4                  | 5.37E-02 | 2                  | 6.26E-02 | 2                  | 6.26E-02 | 3                  | 5.42E-01 | 3                  | 5.42E-01 |
| WT1      | 11  | 1                  | 7.19E-01 | 1                  | 7.19E-01 | 1                  | 6.27E-02 | 1                  | 6.27E-02 | 1                  | 1.91E-01 | 1                  | 1.91E-01 |
| VPS13B   | 8   | 7                  | 2.70E-01 | 8                  | 2.69E-01 | 7                  | 2.13E-01 | 8                  | 2.17E-01 | 5                  | 6.28E-02 | 6                  | 6.45E-02 |
| PML      | 15  | 2                  | 4.17E-01 | 2                  | 4.17E-01 | 2                  | 6.28E-02 | 2                  | 6.28E-02 | 1                  | 1.92E-01 | 1                  | 1.92E-01 |
| PHLPP1   | 18  | 6                  | 4.55E-01 | 6                  | 4.55E-01 | 5                  | 1.25E-01 | 5                  | 1.25E-01 | 2                  | 6.29E-02 | 2                  | 6.29E-02 |
| TRANK1   | 3   | 7                  | 8.20E-01 | 7                  | 8.20E-01 | 7                  | 6.29E-02 | 7                  | 6.29E-02 | 5                  | 1.19E-01 | 5                  | 1.19E-01 |
| SGK494   | 17  | 4                  | 1.59E-01 | 4                  | 1.59E-01 | 3                  | 6.30E-02 | 3                  | 6.30E-02 | 3                  | 4.21E-01 | 3                  | 4.21E-01 |
| DNMBP    | 10  | 2                  | 5.81E-01 | 2                  | 5.81E-01 | 3                  | 6.30E-02 | 3                  | 6.30E-02 | 4                  | 6.86E-02 | 4                  | 6.86E-02 |
| CPAMD8   | 19  | 3                  | 2.05E-02 | 3                  | 2.05E-02 | 3                  | 2.35E-01 | 3                  | 2.35E-01 | 1                  | 6.31E-02 | 1                  | 6.31E-02 |
| MICU3    | 8   | 2                  | 3.65E-01 | 2                  | 3.65E-01 | 2                  | 6.34E-02 | 2                  | 6.34E-02 | 2                  | 1.06E-01 | 2                  | 1.06E-01 |
| LRP10    | 14  | 1                  | 6.72E-01 | 1                  | 6.72E-01 | 2                  | 6.35E-02 | 2                  | 6.35E-02 | 2                  | 1.32E-01 | 2                  | 1.32E-01 |
| GAS6     | 13  | 2                  | 4.11E-01 | 2                  | 4.11E-01 | 2                  | 6.36E-02 | 2                  | 6.36E-02 | 2                  | 1.15E-01 | 2                  | 1.15E-01 |
| CRYGN    | 7   | 1                  | 6.50E-01 | 1                  | 6.50E-01 | 2                  | 6.36E-02 | 2                  | 6.36E-02 | 2                  | 1.13E-01 | 2                  | 1.13E-01 |
| CYB5RL   | 1   | 2                  | 2.33E-01 | 2                  | 2.33E-01 | 1                  | 1.80E-01 | 1                  | 1.80E-01 | 2                  | 6.37E-02 | 2                  | 6.37E-02 |
| GPSM1    | 9   | 2                  | 3.84E-01 | 3                  | 3.37E-01 | 2                  | 8.48E-02 | 3                  | 6.39E-02 | 2                  | 1.86E-01 | 3                  | 1.86E-01 |
| DNAH11   | 7   | 31                 | 6.46E-01 | 31                 | 6.46E-01 | 23                 | 6.42E-02 | 23                 | 6.42E-02 | 17                 | 8.05E-02 | 17                 | 8.05E-02 |
| IFIT2    | 10  | 2                  | 4.14E-01 | 2                  | 4.14E-01 | 2                  | 6.43E-02 | 2                  | 6.43E-02 | 1                  | 1.63E-01 | 1                  | 1.63E-01 |
| ASZ1     | 7   | 2                  | 3.89E-01 | 2                  | 3.89E-01 | 2                  | 6.46E-02 | 2                  | 6.46E-02 | 2                  | 1.19E-01 | 2                  | 1.19E-01 |
| ABHD1    | 2   | 2                  | 4.26E-01 | 2                  | 4.26E-01 | 2                  | 6.47E-02 | 2                  | 6.47E-02 | 2                  | 1.18E-01 | 2                  | 1.18E-01 |
| PARM1    | 4   | 2                  | 4.29E-01 | 2                  | 4.29E-01 | 1                  | 6.50E-02 | 1                  | 6.50E-02 | 2                  | 1.47E-01 | 2                  | 1.47E-01 |
| PCDHGB7  | 5   | 3                  | 1.04E-01 | 3                  | 1.04E-01 | 2                  | 6.50E-02 | 2                  | 6.50E-02 | 3                  | 2.67E-01 | 3                  | 2.67E-01 |
| NBEAL1   | 2   | 5                  | 1.14E-02 | 5                  | 1.14E-02 | 2                  | 6.50E-02 | 2                  | 6.50E-02 | 5                  | 5.28E-01 | 5                  | 5.28E-01 |
| ERI2     | 16  | 1                  | 2.12E-01 | 2                  | 5.58E-02 | 1                  | 6.52E-02 | 2                  | 7.75E-02 | 1                  | 3.72E-01 | 2                  | 6.67E-01 |
| SPATA16  | 3   | 1                  | 8.71E-01 | 1                  | 8.71E-01 | 2                  | 6.53E-02 | 2                  | 6.53E-02 | 2                  | 9.28E-02 | 2                  | 9.28E-02 |
| MCPH1    | 8   | 7                  | 1.61E-01 | 8                  | 1.66E-01 | 5                  | 5.19E-01 | 6                  | 5.20E-01 | 3                  | 6.54E-02 | 4                  | 6.54E-02 |
| NFATC2IP | 16  | 2                  | 6.64E-01 | 2                  | 6.64E-01 | 1                  | 6.54E-02 | 1                  | 6.54E-02 | 2                  | 1.54E-01 | 2                  | 1.54E-01 |

| SetID    | Chr | ADEH- vs NA        |          |                    |          | ADEH+ vs ADEH-     |          |                    |          | ADEH+ vs NA        |          |                    |          |
|----------|-----|--------------------|----------|--------------------|----------|--------------------|----------|--------------------|----------|--------------------|----------|--------------------|----------|
|          |     | rarenovel          |          | all                |          | rarenovel          |          | all                |          | rarenovel          |          | all                |          |
|          |     | N variants in test | p-value  | N variants in test | p-value  | N variants in test | p-value  | N variants in test | p-value  | N variants in test | p-value  | N variants in test | p-value  |
| OR5P3    | 11  | 2                  | 2.52E-02 | 2                  | 2.52E-02 | 2                  | 6.55E-02 | 2                  | 6.55E-02 | 2                  | 1.70E-01 | 2                  | 1.70E-01 |
| CPA6     | 8   | 5                  | 5.92E-02 | 6                  | 5.22E-02 | 2                  | 8.87E-02 | 3                  | 6.57E-02 | 5                  | 7.05E-01 | 6                  | 7.57E-01 |
| LIMA1    | 12  | 2                  | 4.39E-01 | 2                  | 4.39E-01 | 2                  | 6.57E-02 | 2                  | 6.57E-02 | 2                  | 1.51E-01 | 2                  | 1.51E-01 |
| APOL6    | 22  | 2                  | 3.38E-01 | 2                  | 3.38E-01 | 2                  | 6.59E-02 | 2                  | 6.59E-02 | 1                  | 1.34E-01 | 1                  | 1.34E-01 |
| FAM98B   | 15  | 1                  | 7.16E-01 | 1                  | 7.16E-01 | 2                  | 6.59E-02 | 2                  | 6.59E-02 | 2                  | 1.32E-01 | 2                  | 1.32E-01 |
| EPHX2    | 8   | 2                  | 8.71E-01 | 3                  | 1.00E+00 | 2                  | 6.90E-02 | 3                  | 6.61E-02 | 1                  | 1.19E-01 | 2                  | 1.33E-01 |
| PSKH1    | 16  | 1                  | 7.11E-01 | 1                  | 7.11E-01 | 2                  | 6.62E-02 | 2                  | 6.62E-02 | 2                  | 1.32E-01 | 2                  | 1.32E-01 |
| FMNL2    | 2   | 2                  | 2.53E-01 | 2                  | 2.53E-01 | 1                  | 6.64E-02 | 1                  | 6.64E-02 | 2                  | 4.28E-01 | 2                  | 4.28E-01 |
| NXPE4    | 11  | 2                  | 4.16E-01 | 2                  | 4.16E-01 | 2                  | 6.64E-02 | 2                  | 6.64E-02 | 2                  | 1.24E-01 | 2                  | 1.24E-01 |
| FAM126A  | 7   | 2                  | 1.45E-02 | 2                  | 1.45E-02 | 1                  | 6.64E-02 | 1                  | 6.64E-02 | 2                  | 4.01E-01 | 2                  | 4.01E-01 |
| ACAT2    | 6   | 2                  | 3.46E-01 | 3                  | 3.46E-01 | 2                  | 6.65E-02 | 3                  | 6.65E-02 | 2                  | 1.27E-01 | 3                  | 1.27E-01 |
| PRND     | 20  | 2                  | 1.44E-02 | 2                  | 1.44E-02 | 1                  | 1.00E+00 | 1                  | 1.00E+00 | 2                  | 6.65E-02 | 2                  | 6.65E-02 |
| BMPR2    | 2   | 3                  | 1.07E-01 | 3                  | 1.07E-01 | 2                  | 6.67E-02 | 2                  | 6.67E-02 | 3                  | 2.43E-01 | 3                  | 2.43E-01 |
| CCDC178  | 18  | 3                  | 2.77E-01 | 3                  | 2.77E-01 | 3                  | 6.67E-02 | 3                  | 6.67E-02 | 1                  | 1.14E-01 | 1                  | 1.14E-01 |
| RNASE4   | 14  | 1                  | 2.29E-01 | 2                  | 2.80E-01 | 1                  | 6.68E-02 | 2                  | 7.67E-02 | 1                  | 4.15E-01 | 2                  | 5.02E-01 |
| LAMA3    | 18  | 12                 | 2.26E-01 | 13                 | 4.50E-01 | 10                 | 7.87E-01 | 11                 | 2.22E-01 | 3                  | 3.62E-01 | 4                  | 6.68E-02 |
| SPERT    | 13  | 3                  | 1.53E-02 | 4                  | 1.69E-02 | 4                  | 5.10E-01 | 5                  | 4.91E-01 | 3                  | 6.68E-02 | 4                  | 2.10E-01 |
| ATP6V1B1 | 2   | 2                  | 6.50E-02 | 2                  | 6.50E-02 | 1                  | 6.69E-02 | 1                  | 6.69E-02 | 2                  | 7.28E-01 | 2                  | 7.28E-01 |
| GUCY1A2  | 11  | 2                  | 4.88E-01 | 2                  | 4.88E-01 | 2                  | 6.74E-02 | 2                  | 6.74E-02 | 2                  | 1.25E-01 | 2                  | 1.25E-01 |
| MOXD1    | 6   | 2                  | 3.55E-01 | 2                  | 3.55E-01 | 2                  | 6.74E-02 | 2                  | 6.74E-02 | 2                  | 1.41E-01 | 2                  | 1.41E-01 |
| KLHDC2   | 14  | 2                  | 3.16E-02 | 2                  | 3.16E-02 | 1                  | 6.74E-02 | 1                  | 6.74E-02 | 2                  | 1.88E-01 | 2                  | 1.88E-01 |
| LRRN1    | 3   | 2                  | 4.50E-01 | 2                  | 4.50E-01 | 2                  | 6.75E-02 | 2                  | 6.75E-02 | 1                  | 1.92E-01 | 1                  | 1.92E-01 |
| OR10X1   | 1   | 5                  | 2.69E-01 | 7                  | 2.80E-01 | 5                  | 2.34E-01 | 7                  | 2.49E-01 | 4                  | 6.76E-02 | 6                  | 9.92E-02 |
| PDCD4    | 10  | 1                  | 2.07E-01 | 1                  | 2.07E-01 | 1                  | 6.77E-02 | 1                  | 6.77E-02 | 1                  | 3.91E-01 | 1                  | 3.91E-01 |
| ZNF530   | 19  | 3                  | 3.25E-01 | 3                  | 3.25E-01 | 3                  | 6.78E-02 | 3                  | 6.78E-02 | 2                  | 3.10E-01 | 2                  | 3.10E-01 |
| LAMC2    | 1   | 5                  | 7.66E-01 | 6                  | 5.56E-01 | 5                  | 6.79E-02 | 6                  | 7.75E-02 | 3                  | 1.59E-01 | 4                  | 2.04E-01 |
| PDGFRA   | 4   | 2                  | 6.15E-02 | 2                  | 6.15E-02 | 2                  | 1.99E-01 | 2                  | 1.99E-01 | 1                  | 6.82E-02 | 1                  | 6.82E-02 |
| SLC17A8  | 12  | 2                  | 3.55E-01 | 2                  | 3.55E-01 | 2                  | 6.83E-02 | 2                  | 6.83E-02 | 2                  | 1.27E-01 | 2                  | 1.27E-01 |
| MRPL28   | 16  | 2                  | 4.08E-01 | 2                  | 4.08E-01 | 2                  | 6.86E-02 | 2                  | 6.86E-02 | 2                  | 1.33E-01 | 2                  | 1.33E-01 |
| AXL      | 19  | 7                  | 3.96E-01 | 7                  | 3.96E-01 | 7                  | 6.87E-02 | 7                  | 6.87E-02 | 5                  | 3.27E-01 | 5                  | 3.27E-01 |
| NAT1     | 8   | 4                  | 6.67E-01 | 4                  | 6.67E-01 | 4                  | 6.89E-02 | 4                  | 6.89E-02 | 3                  | 7.59E-02 | 3                  | 7.59E-02 |
| EPG5     | 18  | 5                  | 2.50E-01 | 5                  | 2.50E-01 | 3                  | 6.90E-02 | 3                  | 6.90E-02 | 3                  | 1.10E-01 | 3                  | 1.10E-01 |
| SCN9A    | 2   | 9                  | 5.37E-01 | 9                  | 5.37E-01 | 8                  | 6.91E-02 | 8                  | 6.91E-02 | 7                  | 2.66E-01 | 7                  | 2.66E-01 |
| VWA7     | 6   | 3                  | 3.67E-01 | 3                  | 3.67E-01 | 2                  | 2.19E-01 | 2                  | 2.19E-01 | 3                  | 6.93E-02 | 3                  | 6.93E-02 |
| FBXO44   | 1   | 2                  | 3.23E-01 | 2                  | 3.23E-01 | 1                  | 6.95E-02 | 1                  | 6.95E-02 | 2                  | 1.56E-01 | 2                  | 1.56E-01 |
| TNFAIP3  | 6   | 1                  | 7.81E-01 | 1                  | 7.81E-01 | 1                  | 6.95E-02 | 1                  | 6.95E-02 | 1                  | 1.86E-01 | 1                  | 1.86E-01 |
| TNS3     | 7   | 8                  | 6.24E-01 | 8                  | 6.24E-01 | 8                  | 1.08E-01 | 8                  | 1.08E-01 | 4                  | 6.95E-02 | 4                  | 6.95E-02 |
| TNFRSF18 | 1   | 2                  | 2.32E-01 | 2                  | 2.32E-01 | 2                  | 6.96E-02 | 2                  | 6.96E-02 | 3                  | 2.98E-01 | 3                  | 2.98E-01 |
| DLEC1    | 3   | 12                 | 3.47E-01 | 12                 | 3.47E-01 | 11                 | 2.13E-01 | 11                 | 2.13E-01 | 3                  | 6.96E-02 | 3                  | 6.96E-02 |
| OLFML2B  | 1   | 3                  | 1.16E-01 | 3                  | 1.16E-01 | 2                  | 6.96E-02 | 2                  | 6.96E-02 | 3                  | 3.28E-01 | 3                  | 3.28E-01 |
| TNIK     | 3   | 4                  | 3.17E-01 | 4                  | 3.17E-01 | 4                  | 3.45E-01 | 4                  | 3.45E-01 | 2                  | 6.99E-02 | 2                  | 6.99E-02 |
| LMF2     | 22  | 7                  | 7.82E-02 | 7                  | 7.82E-02 | 7                  | 2.20E-01 | 7                  | 2.20E-01 | 3                  | 7.01E-02 | 3                  | 7.01E-02 |
| TMEM223  | 11  | 1                  | 4.22E-01 | 1                  | 4.22E-01 | 1                  | 7.01E-02 | 1                  | 7.01E-02 | 1                  | 1.04E-01 | 1                  | 1.04E-01 |
| LAMA4    | 6   | 11                 | 7.33E-01 | 12                 | 8.38E-01 | 9                  | 1.18E-01 | 10                 | 7.03E-02 | 6                  | 1.78E-01 | 7                  | 8.71E-02 |
| RNF151   | 16  | 2                  | 4.14E-01 | 2                  | 4.14E-01 | 1                  | 9.18E-02 | 1                  | 9.18E-02 | 2                  | 7.04E-02 | 2                  | 7.04E-02 |
| ABHD3    | 18  | 2                  | 3.35E-01 | 2                  | 3.35E-01 | 1                  | 7.05E-02 | 1                  | 7.05E-02 | 2                  | 1.78E-01 | 2                  | 1.78E-01 |
| EML6     | 2   | 6                  | 1.97E-01 | 6                  | 1.97E-01 | 8                  | 7.06E-02 | 8                  | 7.06E-02 | 3                  | 7.81E-02 | 3                  | 7.81E-02 |
| TRIM40   | 6   | 4                  | 1.25E-01 | 4                  | 1.25E-01 | 4                  | 2.18E-01 | 4                  | 2.18E-01 | 2                  | 7.07E-02 | 2                  | 7.07E-02 |

| SetID    | Chr | ADEH- vs NA        |          |                    |          | ADEH+ vs ADEH-     |          |                    |          | ADEH+ vs NA        |          |                    |          |
|----------|-----|--------------------|----------|--------------------|----------|--------------------|----------|--------------------|----------|--------------------|----------|--------------------|----------|
|          |     | rarenovel          |          | all                |          | rarenovel          |          | all                |          | rarenovel          |          | all                |          |
|          |     | N variants in test | p-value  | N variants in test | p-value  | N variants in test | p-value  | N variants in test | p-value  | N variants in test | p-value  | N variants in test | p-value  |
| TLL2     | 10  | 6                  | 3.50E-01 | 6                  | 3.50E-01 | 7                  | 2.91E-01 | 7                  | 2.91E-01 | 4                  | 7.07E-02 | 4                  | 7.07E-02 |
| OR4D9    | 11  | 2                  | 5.21E-01 | 2                  | 5.21E-01 | 1                  | 9.97E-02 | 1                  | 9.97E-02 | 2                  | 7.07E-02 | 2                  | 7.07E-02 |
| COL9A3   | 20  | 6                  | 2.11E-01 | 7                  | 4.37E-01 | 5                  | 5.20E-01 | 6                  | 1.62E-01 | 3                  | 2.77E-01 | 4                  | 7.08E-02 |
| DGKD     | 2   | 4                  | 3.04E-01 | 4                  | 3.04E-01 | 5                  | 7.09E-02 | 5                  | 7.09E-02 | 3                  | 1.76E-01 | 3                  | 1.76E-01 |
| SLC13A1  | 7   | 4                  | 3.19E-03 | 4                  | 3.19E-03 | 2                  | 7.11E-02 | 2                  | 7.11E-02 | 3                  | 7.34E-01 | 3                  | 7.34E-01 |
| DDX56    | 7   | 2                  | 7.02E-01 | 2                  | 7.02E-01 | 1                  | 7.14E-02 | 1                  | 7.14E-02 | 2                  | 3.97E-01 | 2                  | 3.97E-01 |
| TLR4     | 9   | 7                  | 7.98E-01 | 7                  | 7.98E-01 | 5                  | 7.15E-02 | 5                  | 7.15E-02 | 4                  | 8.99E-02 | 4                  | 8.99E-02 |
| TPST2    | 22  | 1                  | 8.15E-01 | 1                  | 8.15E-01 | 1                  | 7.17E-02 | 1                  | 7.17E-02 | 1                  | 8.33E-02 | 1                  | 8.33E-02 |
| FDXR     | 17  | 2                  | 2.95E-01 | 2                  | 2.95E-01 | 1                  | 7.18E-02 | 1                  | 7.18E-02 | 2                  | 4.38E-01 | 2                  | 4.38E-01 |
| ABCC3    | 17  | 11                 | 1.67E-01 | 12                 | 2.85E-01 | 7                  | 1.01E-01 | 8                  | 7.23E-02 | 7                  | 9.00E-02 | 8                  | 8.63E-02 |
| ARID4A   | 14  | 2                  | 4.00E-01 | 2                  | 4.00E-01 | 2                  | 7.23E-02 | 2                  | 7.23E-02 | 2                  | 1.30E-01 | 2                  | 1.30E-01 |
| ZBED6CL  | 7   | 2                  | 5.54E-02 | 2                  | 5.54E-02 | 2                  | 7.23E-02 | 2                  | 7.23E-02 | 2                  | 3.12E-01 | 2                  | 3.12E-01 |
| C6orf201 | 6   | 1                  | 7.11E-01 | 2                  | 1.00E+00 | 2                  | 7.24E-02 | 3                  | 1.94E-01 | 2                  | 1.33E-01 | 3                  | 3.59E-01 |
| PHF20L1  | 8   | 4                  | 7.96E-01 | 4                  | 7.96E-01 | 4                  | 8.87E-02 | 4                  | 8.87E-02 | 1                  | 7.25E-02 | 1                  | 7.25E-02 |
| L3HYPDH  | 14  | 2                  | 2.64E-01 | 2                  | 2.64E-01 | 2                  | 1.53E-01 | 2                  | 1.53E-01 | 2                  | 7.26E-02 | 2                  | 7.26E-02 |
| EXO5     | 1   | 1                  | 7.50E-02 | 2                  | 9.71E-02 |                    |          | 1                  | 2.76E-01 | 1                  | 6.28E-01 | 2                  | 7.29E-02 |
| SSPO     | 7   | 3                  | 3.12E-01 | 4                  | 3.14E-01 | 3                  | 8.15E-02 | 4                  | 7.31E-02 | 3                  | 1.42E-01 | 4                  | 1.17E-01 |
| RGS11    | 16  | 6                  | 9.06E-01 | 7                  | 7.31E-01 | 5                  | 1.15E-01 | 6                  | 1.13E-01 | 6                  | 8.06E-02 | 7                  | 7.33E-02 |
| TSC22D2  | 3   | 6                  | 7.10E-01 | 6                  | 7.10E-01 | 4                  | 7.35E-02 | 4                  | 7.35E-02 | 4                  | 2.02E-01 | 4                  | 2.02E-01 |
| CCP110   | 16  | 2                  | 8.28E-01 | 3                  | 8.31E-01 | 3                  | 8.05E-02 | 4                  | 7.94E-02 | 2                  | 7.52E-02 | 3                  | 7.36E-02 |
| NKX2-3   | 10  | 1                  | 6.74E-01 | 1                  | 6.74E-01 | 1                  | 7.36E-02 | 1                  | 7.36E-02 | 1                  | 1.99E-01 | 1                  | 1.99E-01 |
| DRD2     | 11  | 1                  | 4.33E-01 | 1                  | 4.33E-01 | 1                  | 1.72E-01 | 1                  | 1.72E-01 | 1                  | 7.36E-02 | 1                  | 7.36E-02 |
| TRPM1    | 15  | 13                 | 6.45E-01 | 14                 | 1.76E-01 | 10                 | 2.21E-01 | 11                 | 2.17E-01 | 10                 | 1.39E-01 | 11                 | 7.37E-02 |
| TNFRSF25 | 1   | 2                  | 5.03E-01 | 2                  | 5.03E-01 | 2                  | 7.38E-02 | 2                  | 7.38E-02 | 2                  | 1.44E-01 | 2                  | 1.44E-01 |
| NUP98    | 11  | 4                  | 2.17E-02 | 4                  | 2.17E-02 | 2                  | 7.41E-02 | 2                  | 7.41E-02 | 5                  | 5.90E-01 | 5                  | 5.90E-01 |
| CYP1A1   | 15  | 2                  | 4.68E-01 | 2                  | 4.68E-01 | 2                  | 7.42E-02 | 2                  | 7.42E-02 | 1                  | 1.91E-01 | 1                  | 1.91E-01 |
| SLC7A4   | 22  | 5                  | 3.88E-01 | 5                  | 3.88E-01 | 5                  | 1.93E-01 | 5                  | 1.93E-01 | 3                  | 7.43E-02 | 3                  | 7.43E-02 |
| CIAO1    | 2   | 2                  | 2.02E-01 | 2                  | 2.02E-01 | 1                  | 7.44E-02 | 1                  | 7.44E-02 | 2                  | 4.39E-01 | 2                  | 4.39E-01 |
| IPCEF1   | 6   |                    |          | 1                  | 8.17E-01 |                    |          | 1                  | 7.48E-02 |                    |          | 1                  | 1.14E-01 |
| ZFHX2    | 14  | 3                  | 1.72E-01 | 3                  | 1.72E-01 | 2                  | 7.50E-02 | 2                  | 7.50E-02 | 3                  | 3.48E-01 | 3                  | 3.48E-01 |
| CRIM1    | 2   | 1                  | 7.27E-01 | 1                  | 7.27E-01 | 2                  | 7.52E-02 | 2                  | 7.52E-02 | 2                  | 1.46E-01 | 2                  | 1.46E-01 |
| CCDC114  | 19  | 2                  | 8.07E-01 | 2                  | 8.07E-01 | 2                  | 7.52E-02 | 2                  | 7.52E-02 | 1                  | 1.67E-01 | 1                  | 1.67E-01 |
| EME2     | 16  | 3                  | 4.05E-01 | 3                  | 4.05E-01 | 2                  | 2.15E-01 | 2                  | 2.15E-01 | 2                  | 7.53E-02 | 2                  | 7.53E-02 |
| IFNA5    | 9   | 2                  | 1.00E+00 | 2                  | 1.00E+00 | 2                  | 7.54E-02 | 2                  | 7.54E-02 | 1                  | 7.84E-02 | 1                  | 7.84E-02 |
| KLK4     | 19  | 2                  | 2.23E-01 | 2                  | 2.23E-01 | 1                  | 7.54E-02 | 1                  | 7.54E-02 | 2                  | 5.05E-01 | 2                  | 5.05E-01 |
| ARHGDI3  | 16  | 2                  | 2.89E-01 | 2                  | 2.89E-01 | 2                  | 7.54E-02 | 2                  | 7.54E-02 | 2                  | 3.95E-01 | 2                  | 3.95E-01 |
| NPTXR    | 22  | 2                  | 5.11E-01 | 2                  | 5.11E-01 | 3                  | 7.54E-02 | 3                  | 7.54E-02 | 2                  | 1.27E-01 | 2                  | 1.27E-01 |
| HDAC10   | 22  | 2                  | 7.31E-01 | 2                  | 7.31E-01 | 2                  | 7.55E-02 | 2                  | 7.55E-02 | 3                  | 2.66E-01 | 3                  | 2.66E-01 |
| ANO9     | 11  | 7                  | 4.10E-01 | 7                  | 4.10E-01 | 6                  | 1.63E-01 | 6                  | 1.63E-01 | 4                  | 7.55E-02 | 4                  | 7.55E-02 |
| RGR      | 10  | 1                  | 6.82E-01 | 1                  | 6.82E-01 | 1                  | 7.56E-02 | 1                  | 7.56E-02 | 1                  | 2.12E-01 | 1                  | 2.12E-01 |
| OGFOD2   | 12  | 2                  | 4.25E-01 | 2                  | 4.25E-01 | 2                  | 7.56E-02 | 2                  | 7.56E-02 | 2                  | 1.55E-01 | 2                  | 1.55E-01 |
| ATP10D   | 4   | 3                  | 1.22E-01 | 4                  | 2.42E-01 | 2                  | 7.58E-02 | 3                  | 1.31E-01 | 3                  | 3.28E-01 | 4                  | 3.96E-01 |
| OLFML3   | 1   | 2                  | 5.10E-01 | 2                  | 5.10E-01 | 2                  | 7.60E-02 | 2                  | 7.60E-02 | 2                  | 1.41E-01 | 2                  | 1.41E-01 |
| MRFAP1L1 | 4   | 1                  | 8.64E-01 | 1                  | 8.64E-01 | 1                  | 7.60E-02 | 1                  | 7.60E-02 | 1                  | 1.49E-01 | 1                  | 1.49E-01 |
| KIAA0556 | 16  | 5                  | 6.96E-01 | 5                  | 6.96E-01 | 5                  | 1.87E-01 | 5                  | 1.87E-01 | 5                  | 7.62E-02 | 5                  | 7.62E-02 |
| AMBP     | 9   | 2                  | 4.59E-01 | 2                  | 4.59E-01 | 2                  | 7.64E-02 | 2                  | 7.64E-02 | 2                  | 1.64E-01 | 2                  | 1.64E-01 |
| SCPEP1   | 17  | 2                  | 3.64E-01 | 2                  | 3.64E-01 | 2                  | 7.66E-02 | 2                  | 7.66E-02 | 2                  | 1.52E-01 | 2                  | 1.52E-01 |
| CLYBL    | 13  | 2                  | 1.16E-01 | 2                  | 1.16E-01 | 1                  | 7.69E-02 | 1                  | 7.69E-02 | 2                  | 1.75E-01 | 2                  | 1.75E-01 |

| SetID    | Chr | ADEH- vs NA        |          |                    |          | ADEH+ vs ADEH-     |          |                    |          | ADEH+ vs NA        |          |                    |          |
|----------|-----|--------------------|----------|--------------------|----------|--------------------|----------|--------------------|----------|--------------------|----------|--------------------|----------|
|          |     | rarenovel          |          | all                |          | rarenovel          |          | all                |          | rarenovel          |          | all                |          |
|          |     | N variants in test | p-value  | N variants in test | p-value  | N variants in test | p-value  | N variants in test | p-value  | N variants in test | p-value  | N variants in test | p-value  |
| GIMAP2   | 7   | 3                  | 1.44E-02 | 3                  | 1.44E-02 | 1                  | 1.14E-01 | 1                  | 1.14E-01 | 3                  | 7.69E-02 | 3                  | 7.69E-02 |
| BAAT     | 9   | 2                  | 3.02E-02 | 2                  | 3.02E-02 | 2                  | 7.69E-02 | 2                  | 7.69E-02 | 1                  | 3.22E-01 | 1                  | 3.22E-01 |
| TRIM65   | 17  | 6                  | 2.36E-01 | 6                  | 2.36E-01 | 4                  | 7.71E-02 | 4                  | 7.71E-02 | 4                  | 3.81E-01 | 4                  | 3.81E-01 |
| CCDC154  | 16  | 3                  | 1.11E-01 | 3                  | 1.11E-01 | 2                  | 7.73E-02 | 2                  | 7.73E-02 | 3                  | 3.10E-01 | 3                  | 3.10E-01 |
| RSAD1    | 17  | 2                  | 4.15E-01 | 2                  | 4.15E-01 | 2                  | 7.75E-02 | 2                  | 7.75E-02 | 2                  | 1.46E-01 | 2                  | 1.46E-01 |
| OR2W3    | 1   | 3                  | 1.35E-02 | 4                  | 1.35E-02 | 3                  | 7.75E-02 | 4                  | 7.76E-02 | 1                  | 1.00E+00 | 2                  | 1.00E+00 |
| OXGR1    | 13  | 2                  | 3.82E-01 | 2                  | 3.82E-01 | 2                  | 7.78E-02 | 2                  | 7.78E-02 | 1                  | 2.01E-01 | 1                  | 2.01E-01 |
| CCDC173  | 2   | 3                  | 9.25E-02 | 3                  | 9.25E-02 | 2                  | 7.80E-02 | 2                  | 7.80E-02 | 3                  | 3.45E-01 | 3                  | 3.45E-01 |
| NFKBIZ   | 3   | 2                  | 4.14E-01 | 2                  | 4.14E-01 | 2                  | 7.80E-02 | 2                  | 7.80E-02 | 1                  | 2.14E-01 | 1                  | 2.14E-01 |
| FSHR     | 2   | 3                  | 1.17E-01 | 3                  | 1.17E-01 | 2                  | 7.82E-02 | 2                  | 7.82E-02 | 3                  | 3.64E-01 | 3                  | 3.64E-01 |
| CDO1     | 5   | 2                  | 2.50E-01 | 2                  | 2.50E-01 | 1                  | 7.83E-02 | 1                  | 7.83E-02 | 2                  | 4.30E-01 | 2                  | 4.30E-01 |
| NCAPG2   | 7   | 4                  | 6.17E-01 | 4                  | 6.17E-01 | 4                  | 1.03E-01 | 4                  | 1.03E-01 | 4                  | 7.84E-02 | 4                  | 7.84E-02 |
| MED13    | 17  | 2                  | 4.25E-01 | 2                  | 4.25E-01 | 2                  | 7.84E-02 | 2                  | 7.84E-02 | 2                  | 1.75E-01 | 2                  | 1.75E-01 |
| NOS3     | 7   | 3                  | 1.92E-02 | 3                  | 1.92E-02 | 2                  | 7.88E-02 | 2                  | 7.88E-02 | 2                  | 4.54E-01 | 2                  | 4.54E-01 |
| MYO9A    | 15  | 8                  | 2.22E-01 | 8                  | 2.22E-01 | 8                  | 2.13E-01 | 8                  | 2.13E-01 | 5                  | 7.89E-02 | 5                  | 7.89E-02 |
| SYNJ1    | 21  | 2                  | 7.16E-01 | 2                  | 7.16E-01 | 2                  | 1.35E-01 | 2                  | 1.35E-01 | 1                  | 7.97E-02 | 1                  | 7.97E-02 |
| GAA      | 17  | 3                  | 1.22E-01 | 3                  | 1.22E-01 | 1                  | 7.99E-02 | 1                  | 7.99E-02 | 3                  | 4.17E-01 | 3                  | 4.17E-01 |
| C12orf10 | 12  | 2                  | 4.15E-01 | 2                  | 4.15E-01 | 2                  | 8.00E-02 | 2                  | 8.00E-02 | 1                  | 2.26E-01 | 1                  | 2.26E-01 |
| COQ9     | 16  | 2                  | 4.34E-02 | 2                  | 4.34E-02 | 1                  | 8.04E-02 | 1                  | 8.04E-02 | 2                  | 4.04E-01 | 2                  | 4.04E-01 |
| R3HCC1   | 8   | 2                  | 1.55E-01 | 2                  | 1.55E-01 | 2                  | 3.94E-01 | 2                  | 3.94E-01 | 2                  | 8.04E-02 | 2                  | 8.04E-02 |
| SLC9C2   | 1   | 2                  | 4.20E-01 | 2                  | 4.20E-01 | 2                  | 8.06E-02 | 2                  | 8.06E-02 | 2                  | 1.72E-01 | 2                  | 1.72E-01 |
| OGDH     | 7   | 3                  | 6.40E-01 | 3                  | 6.40E-01 | 2                  | 8.08E-02 | 2                  | 8.08E-02 | 2                  | 2.34E-01 | 2                  | 2.34E-01 |
| WFIKK2   | 17  | 2                  | 2.91E-02 | 2                  | 2.91E-02 | 1                  | 1.16E-01 | 1                  | 1.16E-01 | 2                  | 8.09E-02 | 2                  | 8.09E-02 |
| MAML1    | 5   | 3                  | 7.60E-01 | 4                  | 1.00E+00 | 3                  | 8.10E-02 | 4                  | 1.25E-01 | 2                  | 1.30E-01 | 3                  | 1.67E-01 |
| ASPN     | 9   | 2                  | 1.18E-01 | 2                  | 1.18E-01 | 2                  | 8.10E-02 | 2                  | 8.10E-02 | 1                  | 5.04E-01 | 1                  | 5.04E-01 |
| OR2M5    | 1   | 2                  | 2.95E-01 | 2                  | 2.95E-01 | 1                  | 8.71E-02 | 1                  | 8.71E-02 | 2                  | 8.13E-02 | 2                  | 8.13E-02 |
| OR5A1    | 11  |                    |          | 1                  | 7.98E-01 |                    |          | 1                  | 8.14E-02 |                    |          | 1                  | 8.67E-02 |
| CELSR2   | 1   | 15                 | 1.92E-02 | 15                 | 1.92E-02 | 10                 | 8.17E-02 | 10                 | 8.17E-02 | 12                 | 6.34E-01 | 12                 | 6.34E-01 |
| CLCN2    | 3   | 5                  | 5.75E-01 | 5                  | 5.75E-01 | 5                  | 1.15E-01 | 5                  | 1.15E-01 | 3                  | 8.17E-02 | 3                  | 8.17E-02 |
| KITLG    | 12  | 1                  | 5.66E-01 | 1                  | 5.66E-01 | 1                  | 1.26E-01 | 1                  | 1.26E-01 | 1                  | 8.18E-02 | 1                  | 8.18E-02 |
| AHNAK    | 11  | 16                 | 4.03E-01 | 16                 | 4.03E-01 | 11                 | 1.58E-01 | 11                 | 1.58E-01 | 9                  | 8.19E-02 | 9                  | 8.19E-02 |
| ACSF3    | 16  | 4                  | 2.35E-01 | 4                  | 2.35E-01 | 1                  | 8.21E-02 | 1                  | 8.21E-02 | 4                  | 4.66E-01 | 4                  | 4.66E-01 |
| ZNF835   | 19  |                    |          | 1                  | 7.19E-01 |                    |          | 1                  | 1.34E-01 |                    |          | 1                  | 8.23E-02 |
| RBL1     | 20  | 6                  | 1.00E+00 | 6                  | 1.00E+00 | 5                  | 1.03E-01 | 5                  | 1.03E-01 | 3                  | 8.25E-02 | 3                  | 8.25E-02 |
| CCER1    | 12  | 2                  | 5.16E-01 | 2                  | 5.16E-01 | 2                  | 8.26E-02 | 2                  | 8.26E-02 | 2                  | 1.85E-01 | 2                  | 1.85E-01 |
| NRXN1    | 2   | 2                  | 4.47E-01 | 2                  | 4.47E-01 | 2                  | 8.28E-02 | 2                  | 8.28E-02 | 2                  | 1.87E-01 | 2                  | 1.87E-01 |
| FGFRL1   | 4   | 1                  | 4.56E-01 | 1                  | 4.56E-01 | 2                  | 1.04E-01 | 2                  | 1.04E-01 | 2                  | 8.29E-02 | 2                  | 8.29E-02 |
| EPB41L1  | 20  | 4                  | 4.84E-01 | 4                  | 4.84E-01 | 4                  | 2.04E-01 | 4                  | 2.04E-01 | 2                  | 8.30E-02 | 2                  | 8.30E-02 |
| WDR60    | 7   | 5                  | 8.13E-01 | 5                  | 8.13E-01 | 6                  | 1.67E-01 | 6                  | 1.67E-01 | 2                  | 8.30E-02 | 2                  | 8.30E-02 |
| TRIP12   | 2   | 2                  | 9.29E-01 | 2                  | 9.29E-01 | 3                  | 8.33E-02 | 3                  | 8.33E-02 | 3                  | 8.30E-02 | 3                  | 8.30E-02 |
| TBC1D1   | 4   | 2                  | 4.10E-01 | 3                  | 5.10E-01 | 2                  | 8.32E-02 | 3                  | 8.94E-02 | 2                  | 1.78E-01 | 3                  | 1.87E-01 |
| TBC1D30  | 12  | 3                  | 8.24E-01 | 3                  | 8.24E-01 | 2                  | 9.80E-02 | 2                  | 9.80E-02 | 3                  | 8.34E-02 | 3                  | 8.34E-02 |
| EVC      | 4   | 2                  | 4.51E-01 | 2                  | 4.51E-01 | 2                  | 2.12E-01 | 2                  | 2.12E-01 | 2                  | 8.35E-02 | 2                  | 8.35E-02 |
| MCM8     | 20  | 3                  | 7.24E-01 | 3                  | 7.24E-01 | 3                  | 8.35E-02 | 3                  | 8.35E-02 | 3                  | 1.31E-01 | 3                  | 1.31E-01 |
| CFAP44   | 3   | 7                  | 1.07E-01 | 7                  | 1.07E-01 | 3                  | 8.38E-02 | 3                  | 8.38E-02 | 6                  | 4.87E-01 | 6                  | 4.87E-01 |
| FAN1     | 15  | 4                  | 3.19E-01 | 4                  | 3.19E-01 | 3                  | 8.39E-02 | 3                  | 8.39E-02 | 3                  | 2.26E-01 | 3                  | 2.26E-01 |
| ZNF550   | 19  | 4                  | 1.09E-01 | 4                  | 1.09E-01 | 3                  | 8.40E-02 | 3                  | 8.40E-02 | 4                  | 2.13E-01 | 4                  | 2.13E-01 |
| OR51I2   | 11  | 4                  | 2.00E-01 | 5                  | 2.01E-01 | 3                  | 8.47E-02 | 4                  | 8.49E-02 | 2                  | 5.00E-01 | 3                  | 4.98E-01 |



| SetID    | Chr | ADEH- vs NA        |          |                    |          | ADEH+ vs ADEH-     |          |                    |          | ADEH+ vs NA        |          |                    |          |
|----------|-----|--------------------|----------|--------------------|----------|--------------------|----------|--------------------|----------|--------------------|----------|--------------------|----------|
|          |     | rarenovel          |          | all                |          | rarenovel          |          | all                |          | rarenovel          |          | all                |          |
|          |     | N variants in test | p-value  | N variants in test | p-value  | N variants in test | p-value  | N variants in test | p-value  | N variants in test | p-value  | N variants in test | p-value  |
| NUP58    | 13  | 3                  | 3.06E-01 | 3                  | 3.06E-01 | 1                  | 8.47E-02 | 1                  | 8.47E-02 | 3                  | 3.18E-01 | 3                  | 3.18E-01 |
| NEMF     | 14  | 2                  | 4.75E-01 | 2                  | 4.75E-01 | 2                  | 8.47E-02 | 2                  | 8.47E-02 | 2                  | 1.83E-01 | 2                  | 1.83E-01 |
| EXTL3    | 8   | 2                  | 3.56E-01 | 2                  | 3.56E-01 | 2                  | 8.49E-02 | 2                  | 8.49E-02 | 2                  | 1.83E-01 | 2                  | 1.83E-01 |
| TCN2     | 22  | 2                  | 7.01E-01 | 2                  | 7.01E-01 | 1                  | 1.32E-01 | 1                  | 1.32E-01 | 2                  | 8.51E-02 | 2                  | 8.51E-02 |
| UBXN10   | 1   | 1                  | 4.50E-01 | 1                  | 4.50E-01 | 1                  | 8.53E-02 | 1                  | 8.53E-02 | 1                  | 2.75E-01 | 1                  | 2.75E-01 |
| FBXL8    | 16  | 1                  | 2.49E-01 | 1                  | 2.49E-01 | 2                  | 8.55E-02 | 2                  | 8.55E-02 | 2                  | 2.09E-01 | 2                  | 2.09E-01 |
| MET      | 7   | 5                  | 4.03E-03 | 5                  | 4.03E-03 | 3                  | 8.57E-02 | 3                  | 8.57E-02 | 4                  | 1.00E+00 | 4                  | 1.00E+00 |
| PLEKHG1  | 6   | 7                  | 1.00E+00 | 7                  | 1.00E+00 | 6                  | 8.57E-02 | 6                  | 8.57E-02 | 3                  | 9.07E-02 | 3                  | 9.07E-02 |
| LRCH4    | 7   | 2                  | 3.83E-01 | 2                  | 3.83E-01 | 2                  | 8.58E-02 | 2                  | 8.58E-02 | 2                  | 1.77E-01 | 2                  | 1.77E-01 |
| PRSS55   | 8   | 2                  | 4.10E-01 | 3                  | 4.50E-01 | 2                  | 8.59E-02 | 3                  | 1.41E-01 | 2                  | 1.64E-01 | 3                  | 1.44E-01 |
| FERMT1   | 20  |                    |          | 1                  | 6.97E-01 |                    |          | 1                  | 8.69E-02 |                    |          | 1                  | 2.21E-01 |
| SYNPO2   | 4   | 2                  | 2.14E-01 | 3                  | 4.41E-01 | 2                  | 9.66E-02 | 3                  | 8.71E-02 | 3                  | 2.57E-01 | 4                  | 2.37E-01 |
| COG8     | 16  | 2                  | 3.42E-01 | 2                  | 3.42E-01 | 2                  | 8.73E-02 | 2                  | 8.73E-02 | 2                  | 1.57E-01 | 2                  | 1.57E-01 |
| RNF157   | 17  | 2                  | 1.93E-01 | 3                  | 2.89E-01 | 2                  | 1.00E+00 | 3                  | 3.40E-01 | 1                  | 1.78E-01 | 2                  | 8.75E-02 |
| SPATA17  | 1   | 1                  | 5.58E-02 | 1                  | 5.58E-02 | 2                  | 8.75E-02 | 2                  | 8.75E-02 | 2                  | 3.32E-01 | 2                  | 3.32E-01 |
| SPSB3    | 16  | 2                  | 4.28E-01 | 2                  | 4.28E-01 | 2                  | 1.70E-01 | 2                  | 1.70E-01 | 2                  | 8.76E-02 | 2                  | 8.76E-02 |
| BPIFB1   | 20  | 2                  | 5.22E-01 | 2                  | 5.22E-01 | 2                  | 8.76E-02 | 2                  | 8.76E-02 | 2                  | 1.06E-01 | 2                  | 1.06E-01 |
| UHRF1BP1 | 6   | 2                  | 6.24E-01 | 2                  | 6.24E-01 | 2                  | 8.76E-02 | 2                  | 8.76E-02 | 2                  | 1.62E-01 | 2                  | 1.62E-01 |
| FAT2     | 5   | 21                 | 8.61E-01 | 22                 | 8.60E-01 | 18                 | 8.84E-02 | 19                 | 8.77E-02 | 11                 | 1.09E-01 | 12                 | 1.08E-01 |
| ABCA9    | 17  | 8                  | 7.30E-01 | 9                  | 7.30E-01 | 7                  | 8.77E-02 | 8                  | 8.77E-02 | 6                  | 9.99E-02 | 7                  | 9.99E-02 |
| RHOD     | 11  | 1                  | 1.93E-01 | 1                  | 1.93E-01 | 1                  | 8.78E-02 | 1                  | 8.78E-02 | 1                  | 1.00E+00 | 1                  | 1.00E+00 |
| GOLGB1   | 3   | 7                  | 6.80E-01 | 7                  | 6.80E-01 | 7                  | 1.68E-01 | 7                  | 1.68E-01 | 4                  | 8.78E-02 | 4                  | 8.78E-02 |
| PTPRK    | 6   | 2                  | 2.77E-02 | 2                  | 2.77E-02 | 2                  | 8.79E-02 | 2                  | 8.79E-02 | 2                  | 2.02E-01 | 2                  | 2.02E-01 |
| TEX33    | 22  | 2                  | 5.86E-01 | 3                  | 8.54E-01 | 2                  | 6.04E-01 | 3                  | 2.13E-01 |                    |          | 1                  | 8.83E-02 |
| MYO10    | 5   | 8                  | 1.10E-01 | 8                  | 1.10E-01 | 7                  | 2.28E-01 | 7                  | 2.28E-01 | 6                  | 8.85E-02 | 6                  | 8.85E-02 |
| MYH4     | 17  | 12                 | 5.69E-01 | 14                 | 5.69E-01 | 9                  | 8.85E-02 | 11                 | 8.85E-02 | 9                  | 1.73E-01 | 11                 | 1.73E-01 |
| ATG2B    | 14  | 3                  | 9.72E-02 | 3                  | 9.72E-02 | 2                  | 8.86E-02 | 2                  | 8.86E-02 | 3                  | 3.42E-01 | 3                  | 3.42E-01 |
| SLC28A1  | 15  | 2                  | 8.21E-01 | 2                  | 8.21E-01 | 3                  | 1.05E-01 | 3                  | 1.05E-01 | 2                  | 8.87E-02 | 2                  | 8.87E-02 |
| CNTNAP4  | 16  | 4                  | 1.89E-01 | 4                  | 1.89E-01 | 4                  | 2.09E-01 | 4                  | 2.09E-01 | 1                  | 8.89E-02 | 1                  | 8.89E-02 |
| COL18A1  | 21  | 8                  | 3.27E-01 | 9                  | 3.27E-01 | 8                  | 8.90E-02 | 9                  | 8.89E-02 | 7                  | 2.97E-01 | 8                  | 2.97E-01 |
| EXO1     | 1   | 4                  | 1.94E-01 | 4                  | 1.94E-01 | 4                  | 1.86E-01 | 4                  | 1.86E-01 | 3                  | 8.89E-02 | 3                  | 8.89E-02 |
| CACNA1S  | 1   | 5                  | 4.43E-01 | 6                  | 3.29E-01 | 5                  | 2.93E-01 | 6                  | 2.98E-01 | 2                  | 8.91E-02 | 3                  | 1.01E-01 |
| SOX30    | 5   | 2                  | 2.28E-02 | 2                  | 2.28E-02 | 2                  | 8.95E-02 | 2                  | 8.95E-02 | 2                  | 4.68E-01 | 2                  | 4.68E-01 |
| HSPB9    | 17  |                    |          | 1                  | 2.69E-01 |                    |          | 1                  | 1.72E-01 |                    |          | 1                  | 8.96E-02 |
| PLEKHG4B | 5   | 7                  | 2.82E-01 | 8                  | 2.82E-01 | 6                  | 1.09E-01 | 7                  | 1.09E-01 | 4                  | 8.99E-02 | 5                  | 8.99E-02 |
| GIF      | 11  | 1                  | 7.48E-02 | 1                  | 7.48E-02 | 2                  | 2.88E-01 | 2                  | 2.88E-01 | 2                  | 8.99E-02 | 2                  | 8.99E-02 |
| ST6GAL2  | 2   | 3                  | 2.70E-01 | 3                  | 2.70E-01 | 3                  | 3.15E-01 | 3                  | 3.15E-01 | 2                  | 9.00E-02 | 2                  | 9.00E-02 |
| OR10V1   | 11  | 2                  | 1.56E-01 | 2                  | 1.56E-01 | 2                  | 9.02E-02 | 2                  | 9.02E-02 | 2                  | 1.74E-01 | 2                  | 1.74E-01 |
| CARD8    | 19  | 2                  | 1.00E+00 | 2                  | 1.00E+00 | 2                  | 1.62E-01 | 2                  | 1.62E-01 | 1                  | 9.04E-02 | 1                  | 9.04E-02 |
| CACNA2D3 | 3   | 2                  | 1.66E-01 | 2                  | 1.66E-01 | 2                  | 3.01E-01 | 2                  | 3.01E-01 | 1                  | 9.06E-02 | 1                  | 9.06E-02 |
| IL36B    | 2   | 2                  | 3.39E-01 | 2                  | 3.39E-01 | 2                  | 9.09E-02 | 2                  | 9.09E-02 | 2                  | 9.98E-02 | 2                  | 9.98E-02 |
| ANKRD2   | 10  | 4                  | 3.41E-01 | 4                  | 3.41E-01 | 3                  | 3.59E-01 | 3                  | 3.59E-01 | 3                  | 9.09E-02 | 3                  | 9.09E-02 |
| MFSD6L   | 17  | 4                  | 8.80E-01 | 5                  | 8.80E-01 | 3                  | 9.12E-02 | 4                  | 9.10E-02 | 3                  | 1.11E-01 | 4                  | 1.10E-01 |
| PLAUR    | 19  |                    |          | 1                  | 8.77E-01 |                    |          | 1                  | 9.10E-02 |                    |          | 1                  | 1.00E-01 |
| TTL12    | 22  | 3                  | 7.12E-01 | 5                  | 4.50E-02 | 2                  | 5.92E-01 | 3                  | 3.81E-01 | 1                  | 6.13E-01 | 3                  | 9.11E-02 |
| C1orf105 | 1   | 1                  | 8.95E-01 | 1                  | 8.95E-01 | 1                  | 9.12E-02 | 1                  | 9.12E-02 | 1                  | 1.28E-01 | 1                  | 1.28E-01 |
| MTHFS    | 15  | 2                  | 4.30E-01 | 2                  | 4.30E-01 | 2                  | 9.14E-02 | 2                  | 9.14E-02 | 2                  | 2.18E-01 | 2                  | 2.18E-01 |
| TMEM214  | 2   | 1                  | 6.84E-01 | 2                  | 6.83E-01 | 2                  | 9.15E-02 | 3                  | 9.15E-02 | 2                  | 1.76E-01 | 3                  | 1.76E-01 |

| SetID     | Chr | ADEH- vs NA        |          |                    |          | ADEH+ vs ADEH-     |          |                    |          | ADEH+ vs NA        |          |                    |          |
|-----------|-----|--------------------|----------|--------------------|----------|--------------------|----------|--------------------|----------|--------------------|----------|--------------------|----------|
|           |     | rarenovel          |          | all                |          | rarenovel          |          | all                |          | rarenovel          |          | all                |          |
|           |     | N variants in test | p-value  | N variants in test | p-value  | N variants in test | p-value  | N variants in test | p-value  | N variants in test | p-value  | N variants in test | p-value  |
| CIDEC     | 3   | 3                  | 5.82E-01 | 3                  | 5.82E-01 | 3                  | 2.17E-01 | 3                  | 2.17E-01 | 1                  | 9.17E-02 | 1                  | 9.17E-02 |
| GAB4      | 22  | 2                  | 4.59E-01 | 3                  | 4.59E-01 | 1                  | 9.18E-02 | 2                  | 9.18E-02 | 2                  | 2.44E-01 | 3                  | 2.44E-01 |
| HFE       | 6   | 5                  | 1.00E+00 | 5                  | 1.00E+00 | 5                  | 9.18E-02 | 5                  | 9.18E-02 | 4                  | 1.14E-01 | 4                  | 1.14E-01 |
| ZSWIM1    | 20  | 1                  | 5.35E-01 | 1                  | 5.35E-01 | 1                  | 9.19E-02 | 1                  | 9.19E-02 | 1                  | 2.54E-01 | 1                  | 2.54E-01 |
| ETFB      | 19  | 3                  | 7.88E-02 | 4                  | 7.88E-02 | 2                  | 9.20E-02 | 3                  | 9.20E-02 | 4                  | 4.87E-01 | 5                  | 4.87E-01 |
| SIGLEC15  | 18  | 1                  | 9.81E-01 | 1                  | 9.81E-01 | 1                  | 9.20E-02 | 1                  | 9.20E-02 | 1                  | 2.00E-01 | 1                  | 2.00E-01 |
| CDC42EP1  | 22  | 2                  | 1.00E+00 | 2                  | 1.00E+00 | 2                  | 1.36E-01 | 2                  | 1.36E-01 | 1                  | 9.22E-02 | 1                  | 9.22E-02 |
| N4BP2     | 4   | 3                  | 7.25E-02 | 3                  | 7.25E-02 | 4                  | 4.36E-01 | 4                  | 4.36E-01 | 4                  | 9.23E-02 | 4                  | 9.23E-02 |
| MICU1     | 10  | 2                  | 3.21E-01 | 2                  | 3.21E-01 | 1                  | 9.25E-02 | 1                  | 9.25E-02 | 2                  | 1.24E-01 | 2                  | 1.24E-01 |
| FILIP1    | 6   | 3                  | 5.85E-01 | 3                  | 5.85E-01 | 3                  | 9.49E-02 | 3                  | 9.49E-02 | 1                  | 9.26E-02 | 1                  | 9.26E-02 |
| MTHFR     | 1   | 1                  | 7.46E-01 | 2                  | 7.47E-01 | 1                  | 4.61E-01 | 2                  | 4.62E-01 |                    |          | 1                  | 9.26E-02 |
| RUBCN     | 3   | 13                 | 4.23E-02 | 13                 | 4.23E-02 | 9                  | 9.30E-02 | 9                  | 9.30E-02 | 9                  | 6.46E-01 | 9                  | 6.46E-01 |
| FAM186B   | 12  | 3                  | 4.20E-01 | 3                  | 4.20E-01 | 2                  | 9.31E-02 | 2                  | 9.31E-02 | 3                  | 1.90E-01 | 3                  | 1.90E-01 |
| ATAD3C    | 1   | 5                  | 3.25E-01 | 6                  | 3.38E-01 | 6                  | 9.74E-02 | 7                  | 9.31E-02 | 5                  | 2.73E-01 | 6                  | 2.67E-01 |
| PUSL1     | 1   | 1                  | 8.64E-01 | 1                  | 8.64E-01 | 2                  | 9.33E-02 | 2                  | 9.33E-02 | 2                  | 1.11E-01 | 2                  | 1.11E-01 |
| IGSF5     | 21  | 3                  | 8.95E-02 | 3                  | 8.95E-02 | 3                  | 9.34E-02 | 3                  | 9.34E-02 | 1                  | 4.39E-01 | 1                  | 4.39E-01 |
| APOE      | 19  |                    |          | 1                  | 8.16E-03 |                    |          | 1                  | 5.15E-01 |                    |          | 1                  | 9.34E-02 |
| CAPN14    | 2   | 5                  | 7.04E-01 | 5                  | 7.04E-01 | 6                  | 9.38E-02 | 6                  | 9.38E-02 | 3                  | 1.29E-01 | 3                  | 1.29E-01 |
| ARHGEF17  | 11  | 6                  | 1.25E-02 | 6                  | 1.25E-02 | 4                  | 9.39E-02 | 4                  | 9.39E-02 | 5                  | 4.19E-01 | 5                  | 4.19E-01 |
| C11orf65  | 11  | 2                  | 8.26E-02 | 2                  | 8.26E-02 | 2                  | 9.40E-02 | 2                  | 9.40E-02 | 2                  | 3.22E-01 | 2                  | 3.22E-01 |
| OR51B5    | 11  | 6                  | 1.84E-01 | 7                  | 1.84E-01 | 5                  | 9.42E-02 | 6                  | 9.42E-02 | 5                  | 1.11E-01 | 6                  | 1.11E-01 |
| PFAS      | 17  | 7                  | 1.00E+00 | 7                  | 1.00E+00 | 7                  | 9.42E-02 | 7                  | 9.42E-02 | 5                  | 2.87E-01 | 5                  | 2.87E-01 |
| ITIH3     | 3   | 7                  | 2.37E-01 | 7                  | 2.37E-01 | 3                  | 1.21E-01 | 3                  | 1.21E-01 | 6                  | 9.44E-02 | 6                  | 9.44E-02 |
| PLCH2     | 1   | 11                 | 6.79E-01 | 11                 | 6.79E-01 | 9                  | 1.90E-01 | 9                  | 1.90E-01 | 6                  | 9.45E-02 | 6                  | 9.45E-02 |
| URB2      | 1   | 5                  | 2.60E-02 | 5                  | 2.60E-02 | 3                  | 9.47E-02 | 3                  | 9.47E-02 | 5                  | 1.71E-01 | 5                  | 1.71E-01 |
| TAS2R8    | 12  | 3                  | 6.13E-01 | 3                  | 6.13E-01 | 3                  | 1.43E-01 | 3                  | 1.43E-01 | 2                  | 9.47E-02 | 2                  | 9.47E-02 |
| BUB1B     | 15  | 2                  | 4.55E-01 | 2                  | 4.55E-01 | 2                  | 9.48E-02 | 2                  | 9.48E-02 | 2                  | 1.92E-01 | 2                  | 1.92E-01 |
| ANKS4B    | 16  | 2                  | 6.15E-01 | 2                  | 6.15E-01 | 2                  | 1.56E-01 | 2                  | 1.56E-01 | 1                  | 9.48E-02 | 1                  | 9.48E-02 |
| MAGEF1    | 3   |                    |          | 1                  | 1.64E-01 |                    |          | 1                  | 9.49E-02 |                    |          | 1                  | 3.48E-01 |
| ERMP1     | 9   | 4                  | 3.37E-02 | 4                  | 3.37E-02 | 2                  | 9.54E-02 | 2                  | 9.54E-02 | 3                  | 6.94E-01 | 3                  | 6.94E-01 |
| RXFP2     | 13  | 1                  | 8.75E-01 | 1                  | 8.75E-01 | 1                  | 9.54E-02 | 1                  | 9.54E-02 | 1                  | 2.13E-01 | 1                  | 2.13E-01 |
| RECK      | 9   | 2                  | 3.01E-01 | 2                  | 3.01E-01 | 2                  | 1.05E-01 | 2                  | 1.05E-01 | 2                  | 9.54E-02 | 2                  | 9.54E-02 |
| HHIPL1    | 14  | 3                  | 1.39E-01 | 3                  | 1.39E-01 | 2                  | 9.54E-02 | 2                  | 9.54E-02 | 2                  | 4.69E-01 | 2                  | 4.69E-01 |
| ADGRF3    | 2   | 9                  | 1.79E-01 | 9                  | 1.79E-01 | 8                  | 2.98E-01 | 8                  | 2.98E-01 | 6                  | 9.59E-02 | 6                  | 9.59E-02 |
| CSF2RB    | 22  | 1                  | 1.48E-01 | 1                  | 1.48E-01 | 1                  | 9.59E-02 | 1                  | 9.59E-02 | 1                  | 5.05E-01 | 1                  | 5.05E-01 |
| ANK2      | 4   | 12                 | 3.90E-03 | 12                 | 3.90E-03 | 6                  | 9.60E-02 | 6                  | 9.60E-02 | 8                  | 1.00E+00 | 8                  | 1.00E+00 |
| KIAA1107  | 1   | 5                  | 4.07E-01 | 5                  | 4.07E-01 | 4                  | 5.38E-01 | 4                  | 5.38E-01 | 2                  | 9.60E-02 | 2                  | 9.60E-02 |
| PLA2G7    | 6   | 1                  | 8.94E-01 | 1                  | 8.94E-01 | 2                  | 1.01E-01 | 2                  | 1.01E-01 | 2                  | 9.60E-02 | 2                  | 9.60E-02 |
| EIF4ENIF1 | 22  | 9                  | 5.31E-01 | 9                  | 5.31E-01 | 8                  | 2.17E-01 | 8                  | 2.17E-01 | 2                  | 9.61E-02 | 2                  | 9.61E-02 |
| TMEM202   | 15  | 2                  | 1.63E-01 | 2                  | 1.63E-01 | 2                  | 7.66E-01 | 2                  | 7.66E-01 | 2                  | 9.61E-02 | 2                  | 9.61E-02 |
| MEDAG     | 13  |                    |          | 1                  | 1.99E-01 |                    |          | 1                  | 2.41E-01 |                    |          | 1                  | 9.63E-02 |
| ZNF700    | 19  | 4                  | 9.01E-01 | 5                  | 9.11E-01 | 3                  | 6.70E-01 | 4                  | 1.90E-01 | 2                  | 4.35E-01 | 3                  | 9.66E-02 |
| TRAF3IP2  | 6   | 4                  | 3.27E-01 | 5                  | 2.70E-01 | 3                  | 1.98E-01 | 4                  | 9.66E-02 | 3                  | 1.58E-01 | 4                  | 1.00E-01 |
| PLD2      | 17  | 4                  | 2.98E-01 | 4                  | 2.98E-01 | 4                  | 1.82E-01 | 4                  | 1.82E-01 | 2                  | 9.67E-02 | 2                  | 9.67E-02 |
| ZFP91     | 11  | 2                  | 4.33E-01 | 2                  | 4.33E-01 | 2                  | 9.70E-02 | 2                  | 9.70E-02 | 3                  | 2.64E-01 | 3                  | 2.64E-01 |
| MOB3C     | 1   | 1                  | 5.93E-02 | 2                  | 5.93E-02 |                    |          | 1                  | 9.70E-02 | 1                  | 5.69E-01 | 2                  | 5.69E-01 |
| TAS2R3    | 7   | 2                  | 6.34E-01 | 2                  | 6.34E-01 | 2                  | 9.71E-02 | 2                  | 9.71E-02 | 3                  | 2.39E-01 | 3                  | 2.39E-01 |
| RIMS3     | 1   | 1                  | 9.50E-01 | 1                  | 9.50E-01 | 1                  | 9.72E-02 | 1                  | 9.72E-02 | 1                  | 1.35E-01 | 1                  | 1.35E-01 |

| SetID   | Chr | ADEH- vs NA        |          |                    |          | ADEH+ vs ADEH-     |          |                    |          | ADEH+ vs NA        |          |                    |          |
|---------|-----|--------------------|----------|--------------------|----------|--------------------|----------|--------------------|----------|--------------------|----------|--------------------|----------|
|         |     | rarenovel          |          | all                |          | rarenovel          |          | all                |          | rarenovel          |          | all                |          |
|         |     | N variants in test | p-value  | N variants in test | p-value  | N variants in test | p-value  | N variants in test | p-value  | N variants in test | p-value  | N variants in test | p-value  |
| COL4A3  | 2   | 9                  | 2.22E-01 | 11                 | 2.22E-01 | 8                  | 5.55E-01 | 10                 | 5.55E-01 | 6                  | 9.72E-02 | 8                  | 9.72E-02 |
| DENND1C | 19  | 2                  | 4.23E-01 | 2                  | 4.23E-01 | 1                  | 9.72E-02 | 1                  | 9.72E-02 | 2                  | 9.80E-02 | 2                  | 9.80E-02 |
| ZNF317  | 19  | 3                  | 7.10E-01 | 3                  | 7.10E-01 | 4                  | 1.50E-01 | 4                  | 1.50E-01 | 3                  | 9.74E-02 | 3                  | 9.74E-02 |
| TMEM63B | 6   | 2                  | 1.00E+00 | 2                  | 1.00E+00 | 3                  | 1.07E-01 | 3                  | 1.07E-01 | 2                  | 9.74E-02 | 2                  | 9.74E-02 |
| SLC45A4 | 8   | 2                  | 4.83E-01 | 2                  | 4.83E-01 | 2                  | 9.80E-02 | 2                  | 9.80E-02 | 2                  | 2.14E-01 | 2                  | 2.14E-01 |
| TMED8   | 14  | 1                  | 8.93E-01 | 1                  | 8.93E-01 | 1                  | 9.81E-02 | 1                  | 9.81E-02 | 1                  | 1.70E-01 | 1                  | 1.70E-01 |
| HIVEP1  | 6   | 10                 | 6.21E-01 | 11                 | 6.21E-01 | 10                 | 1.90E-01 | 11                 | 1.90E-01 | 5                  | 9.83E-02 | 6                  | 9.84E-02 |
| CPA4    | 7   | 5                  | 3.52E-01 | 5                  | 3.52E-01 | 3                  | 9.84E-02 | 3                  | 9.84E-02 | 4                  | 5.22E-01 | 4                  | 5.22E-01 |
| COBLL1  | 2   | 1                  | 1.06E-01 | 1                  | 1.06E-01 | 1                  | 9.84E-02 | 1                  | 9.84E-02 | 1                  | 5.73E-01 | 1                  | 5.73E-01 |
| BCL2A1  | 15  |                    |          | 1                  | 5.70E-01 |                    |          | 1                  | 1.84E-01 |                    |          | 1                  | 9.84E-02 |
| ADGRF2  | 6   | 2                  | 1.82E-01 | 3                  | 1.94E-01 | 3                  | 9.97E-02 | 4                  | 9.86E-02 | 3                  | 5.76E-01 | 4                  | 5.76E-01 |
| OAS3    | 12  | 8                  | 7.29E-01 | 8                  | 7.29E-01 | 8                  | 9.86E-02 | 8                  | 9.86E-02 | 5                  | 1.43E-01 | 5                  | 1.43E-01 |
| SLFN12  | 17  | 2                  | 3.51E-01 | 2                  | 3.51E-01 | 2                  | 9.89E-02 | 2                  | 9.89E-02 | 1                  | 1.48E-01 | 1                  | 1.48E-01 |
| ZNF684  | 1   | 1                  | 4.37E-01 | 1                  | 4.37E-01 | 1                  | 9.89E-02 | 1                  | 9.89E-02 | 1                  | 2.58E-01 | 1                  | 2.58E-01 |
| RTP1    | 3   | 1                  | 1.66E-01 | 1                  | 1.66E-01 | 1                  | 1.69E-01 | 1                  | 1.69E-01 | 1                  | 9.90E-02 | 1                  | 9.90E-02 |
| ZNF474  | 5   |                    |          | 1                  | 3.08E-01 |                    |          | 1                  | 9.91E-02 |                    |          | 1                  | 3.46E-01 |
| ATP8B3  | 19  | 10                 | 8.84E-01 | 10                 | 8.84E-01 | 8                  | 1.04E-01 | 8                  | 1.04E-01 | 5                  | 9.91E-02 | 5                  | 9.91E-02 |
| CPT1B   | 22  | 2                  | 1.91E-01 | 2                  | 1.91E-01 | 3                  | 1.97E-01 | 3                  | 1.97E-01 | 3                  | 9.92E-02 | 3                  | 9.92E-02 |
| MRPL22  | 5   | 1                  | 7.08E-02 | 1                  | 7.08E-02 | 1                  | 1.00E+00 | 1                  | 1.00E+00 | 1                  | 9.93E-02 | 1                  | 9.93E-02 |
| CGN     | 1   | 9                  | 5.48E-01 | 10                 | 5.29E-01 | 7                  | 1.57E-01 | 8                  | 1.12E-01 | 6                  | 1.05E-01 | 7                  | 9.93E-02 |
| ENPP7   | 17  | 1                  | 4.79E-01 | 1                  | 4.79E-01 | 1                  | 9.94E-02 | 1                  | 9.94E-02 | 1                  | 3.53E-01 | 1                  | 3.53E-01 |
| C2orf83 | 2   |                    |          | 1                  | 1.49E-01 |                    |          | 1                  | 3.40E-01 |                    |          | 1                  | 9.94E-02 |
| OPALIN  | 10  | 1                  | 9.82E-02 | 1                  | 9.82E-02 | 1                  | 9.96E-02 | 1                  | 9.96E-02 | 1                  | 1.00E+00 | 1                  | 1.00E+00 |
| XKR9    | 8   | 4                  | 1.53E-01 | 4                  | 1.53E-01 | 4                  | 3.68E-01 | 4                  | 3.68E-01 | 3                  | 9.97E-02 | 3                  | 9.97E-02 |
| HIPK3   | 11  | 4                  | 5.05E-01 | 4                  | 5.05E-01 | 4                  | 1.98E-01 | 4                  | 1.98E-01 | 2                  | 9.99E-02 | 2                  | 9.99E-02 |
| CYP4B1  | 1   | 3                  | 1.98E-01 | 5                  | 2.08E-01 | 2                  | 2.63E-01 | 4                  | 2.58E-01 | 2                  | 9.99E-02 | 4                  | 1.10E-01 |
| EFTUD1  | 15  | 2                  | 2.63E-01 | 3                  | 8.37E-02 | 2                  | 3.17E-01 | 3                  | 9.99E-02 | 1                  | 2.10E-01 | 2                  | 2.85E-01 |
| TAS2R46 | 12  |                    |          | 1                  | 1.00E+00 |                    |          | 1                  | 1.00E-01 |                    |          | 1                  | 1.33E-01 |
| GLTSCR2 | 19  | 2                  | 3.95E-01 | 2                  | 3.95E-01 | 3                  | 1.00E-01 | 3                  | 1.00E-01 | 2                  | 2.23E-01 | 2                  | 2.23E-01 |
| IZUMO4  | 19  | 4                  | 3.42E-03 | 4                  | 3.42E-03 | 4                  | 1.00E-01 | 4                  | 1.00E-01 | 2                  | 3.42E-01 | 2                  | 3.42E-01 |
| RCBTB2  | 13  | 4                  | 8.08E-01 | 4                  | 8.08E-01 | 3                  | 2.21E-01 | 3                  | 2.21E-01 | 2                  | 1.01E-01 | 2                  | 1.01E-01 |
| PKM     | 15  | 4                  | 3.85E-01 | 4                  | 3.85E-01 | 2                  | 1.01E-01 | 2                  | 1.01E-01 | 3                  | 2.53E-01 | 3                  | 2.53E-01 |
| NAIF1   | 9   | 3                  | 8.96E-01 | 3                  | 8.96E-01 | 3                  | 2.34E-01 | 3                  | 2.34E-01 | 2                  | 1.01E-01 | 2                  | 1.01E-01 |
| PCM1    | 8   | 13                 | 7.89E-01 | 13                 | 7.89E-01 | 11                 | 1.01E-01 | 11                 | 1.01E-01 | 4                  | 2.21E-01 | 4                  | 2.21E-01 |
| POLD1   | 19  | 3                  | 7.41E-01 | 3                  | 7.41E-01 | 2                  | 1.15E-01 | 2                  | 1.15E-01 | 2                  | 1.01E-01 | 2                  | 1.01E-01 |
| DNAH3   | 16  | 31                 | 6.66E-01 | 35                 | 5.81E-01 | 23                 | 2.70E-01 | 27                 | 1.38E-01 | 22                 | 2.07E-01 | 26                 | 1.01E-01 |
| CENPT   | 16  | 2                  | 4.32E-01 | 2                  | 4.32E-01 | 2                  | 3.65E-01 | 2                  | 3.65E-01 | 2                  | 1.02E-01 | 2                  | 1.02E-01 |
| TEP1    | 14  | 11                 | 1.00E+00 | 12                 | 8.81E-01 | 9                  | 1.67E-01 | 10                 | 1.13E-01 | 6                  | 2.09E-01 | 7                  | 1.02E-01 |
| ZCWPW1  | 7   | 2                  | 5.98E-02 | 2                  | 5.98E-02 | 1                  | 1.02E-01 | 1                  | 1.02E-01 | 2                  | 1.00E+00 | 2                  | 1.00E+00 |
| PCTP    | 17  | 2                  | 3.70E-01 | 2                  | 3.70E-01 | 2                  | 4.37E-01 | 2                  | 4.37E-01 | 1                  | 1.02E-01 | 1                  | 1.02E-01 |
| UCP3    | 11  | 2                  | 5.43E-01 | 2                  | 5.43E-01 | 3                  | 1.63E-01 | 3                  | 1.63E-01 | 2                  | 1.02E-01 | 2                  | 1.02E-01 |
| MOK     | 14  | 7                  | 7.71E-01 | 7                  | 7.71E-01 | 4                  | 1.02E-01 | 4                  | 1.02E-01 | 5                  | 2.62E-01 | 5                  | 2.62E-01 |
| ZNF772  | 19  | 1                  | 5.24E-01 | 1                  | 5.24E-01 | 1                  | 1.66E-01 | 1                  | 1.66E-01 | 1                  | 1.02E-01 | 1                  | 1.02E-01 |
| ATP2A3  | 17  | 4                  | 5.26E-01 | 4                  | 5.26E-01 | 3                  | 3.22E-01 | 3                  | 3.22E-01 | 2                  | 1.02E-01 | 2                  | 1.02E-01 |
| CDHR2   | 5   | 6                  | 4.45E-01 | 8                  | 5.62E-01 | 4                  | 2.31E-01 | 6                  | 2.83E-01 | 4                  | 1.02E-01 | 6                  | 1.31E-01 |
| TTC33   | 5   | 2                  | 1.62E-01 | 2                  | 1.62E-01 | 2                  | 1.16E-01 | 2                  | 1.16E-01 | 2                  | 1.02E-01 | 2                  | 1.02E-01 |
| LRRCC1  | 8   | 8                  | 2.36E-01 | 8                  | 2.36E-01 | 6                  | 1.03E-01 | 6                  | 1.03E-01 | 6                  | 7.31E-01 | 6                  | 7.31E-01 |
| TLR2    | 4   | 4                  | 3.16E-01 | 4                  | 3.16E-01 | 4                  | 1.03E-01 | 4                  | 1.03E-01 | 4                  | 1.48E-01 | 4                  | 1.48E-01 |

| SetID       | Chr | ADEH- vs NA        |          |                    |          | ADEH+ vs ADEH-     |          |                    |          | ADEH+ vs NA        |          |                    |          |
|-------------|-----|--------------------|----------|--------------------|----------|--------------------|----------|--------------------|----------|--------------------|----------|--------------------|----------|
|             |     | rarenovel          |          | all                |          | rarenovel          |          | all                |          | rarenovel          |          | all                |          |
|             |     | N variants in test | p-value  | N variants in test | p-value  | N variants in test | p-value  | N variants in test | p-value  | N variants in test | p-value  | N variants in test | p-value  |
| SDHAF4      | 6   | 1                  | 1.80E-01 | 1                  | 1.80E-01 | 1                  | 3.80E-01 | 1                  | 3.80E-01 | 1                  | 1.03E-01 | 1                  | 1.03E-01 |
| PRELID2     | 5   | 1                  | 9.05E-01 | 1                  | 9.05E-01 | 2                  | 1.03E-01 | 2                  | 1.03E-01 | 2                  | 1.39E-01 | 2                  | 1.39E-01 |
| SNCG        | 10  | 1                  | 9.13E-01 | 1                  | 9.13E-01 | 1                  | 1.03E-01 | 1                  | 1.03E-01 | 1                  | 1.55E-01 | 1                  | 1.55E-01 |
| DKK2        | 4   | 1                  | 3.17E-01 | 1                  | 3.17E-01 | 1                  | 3.20E-01 | 1                  | 3.20E-01 | 1                  | 1.03E-01 | 1                  | 1.03E-01 |
| GTF2F1      | 19  | 3                  | 6.29E-01 | 3                  | 6.29E-01 | 3                  | 1.28E-01 | 3                  | 1.28E-01 | 2                  | 1.03E-01 | 2                  | 1.03E-01 |
| C4orf33     | 4   | 1                  | 7.60E-01 | 2                  | 1.00E+00 | 1                  | 5.05E-01 | 2                  | 5.69E-01 |                    |          | 1                  | 1.04E-01 |
| PDILT       | 16  | 8                  | 1.59E-01 | 8                  | 1.59E-01 | 7                  | 3.13E-01 | 7                  | 3.13E-01 | 4                  | 1.04E-01 | 4                  | 1.04E-01 |
| PRAP1       | 10  | 1                  | 1.76E-01 | 1                  | 1.76E-01 | 1                  | 1.04E-01 | 1                  | 1.04E-01 | 1                  | 5.00E-01 | 1                  | 5.00E-01 |
| CNTF        | 11  | 2                  | 1.00E+00 | 2                  | 1.00E+00 | 3                  | 1.49E-01 | 3                  | 1.49E-01 | 2                  | 1.05E-01 | 2                  | 1.05E-01 |
| ASNSD1      | 2   | 3                  | 5.85E-01 | 3                  | 5.85E-01 | 3                  | 1.05E-01 | 3                  | 1.05E-01 | 2                  | 1.25E-01 | 2                  | 1.25E-01 |
| HELZ2       | 20  | 14                 | 1.25E-01 | 15                 | 1.16E-01 | 10                 | 1.05E-01 | 11                 | 1.05E-01 | 10                 | 2.29E-01 | 11                 | 2.29E-01 |
| C6orf223    | 6   | 3                  | 1.53E-01 | 3                  | 1.53E-01 | 3                  | 1.05E-01 | 3                  | 1.05E-01 | 2                  | 4.18E-01 | 2                  | 4.18E-01 |
| SYTL3       | 6   | 4                  | 5.96E-01 | 4                  | 5.96E-01 | 5                  | 2.89E-01 | 5                  | 2.89E-01 | 2                  | 1.05E-01 | 2                  | 1.05E-01 |
| NCAPD2      | 12  | 5                  | 5.71E-01 | 5                  | 5.71E-01 | 5                  | 2.83E-01 | 5                  | 2.83E-01 | 2                  | 1.05E-01 | 2                  | 1.05E-01 |
| ABHD14A-ACY | 3   | 4                  | 3.45E-01 | 4                  | 3.45E-01 | 2                  | 1.05E-01 | 2                  | 1.05E-01 | 4                  | 7.44E-01 | 4                  | 7.44E-01 |
| ACY1        | 3   | 3                  | 4.83E-01 | 3                  | 4.83E-01 | 2                  | 1.05E-01 | 2                  | 1.05E-01 | 3                  | 6.16E-01 | 3                  | 6.16E-01 |
| DNAI2       | 17  | 3                  | 7.09E-01 | 3                  | 7.09E-01 | 2                  | 1.84E-01 | 2                  | 1.84E-01 | 2                  | 1.06E-01 | 2                  | 1.06E-01 |
| N4BP3       | 5   | 4                  | 7.74E-01 | 4                  | 7.74E-01 | 4                  | 1.47E-01 | 4                  | 1.47E-01 | 2                  | 1.06E-01 | 2                  | 1.06E-01 |
| CSAD        | 12  | 3                  | 1.00E+00 | 3                  | 1.00E+00 | 4                  | 1.06E-01 | 4                  | 1.06E-01 | 2                  | 1.31E-01 | 2                  | 1.31E-01 |
| C1orf50     | 1   | 2                  | 7.61E-01 | 2                  | 7.61E-01 | 1                  | 1.06E-01 | 1                  | 1.06E-01 | 2                  | 1.99E-01 | 2                  | 1.99E-01 |
| DPF3        | 14  | 2                  | 6.57E-02 | 2                  | 6.57E-02 | 2                  | 1.06E-01 | 2                  | 1.06E-01 | 1                  | 2.92E-01 | 1                  | 2.92E-01 |
| UNC45B      | 17  | 7                  | 3.20E-01 | 8                  | 3.00E-01 | 6                  | 2.35E-01 | 7                  | 2.42E-01 | 5                  | 1.07E-01 | 6                  | 1.63E-01 |
| ARHGEF40    | 14  | 4                  | 2.50E-01 | 5                  | 2.51E-01 | 3                  | 5.04E-01 | 4                  | 5.09E-01 | 2                  | 1.07E-01 | 3                  | 1.08E-01 |
| DMKN        | 19  | 4                  | 6.74E-02 | 4                  | 6.74E-02 | 3                  | 1.07E-01 | 3                  | 1.07E-01 | 4                  | 9.05E-01 | 4                  | 9.05E-01 |
| USP31       | 16  | 5                  | 5.99E-01 | 7                  | 3.60E-01 | 4                  | 4.60E-01 | 6                  | 1.07E-01 | 2                  | 2.15E-01 | 4                  | 1.15E-01 |
| SEZ6L       | 22  | 2                  | 8.26E-01 | 2                  | 8.26E-01 | 2                  | 1.07E-01 | 2                  | 1.07E-01 | 1                  | 1.14E-01 | 1                  | 1.14E-01 |
| SPTAN1      | 9   | 4                  | 8.34E-01 | 4                  | 8.34E-01 | 4                  | 1.77E-01 | 4                  | 1.77E-01 | 2                  | 1.07E-01 | 2                  | 1.07E-01 |
| ZNF48       | 16  | 2                  | 6.25E-01 | 2                  | 6.25E-01 | 1                  | 1.07E-01 | 1                  | 1.07E-01 | 2                  | 4.74E-01 | 2                  | 4.74E-01 |
| CASP5       | 11  | 2                  | 1.00E+00 | 2                  | 1.00E+00 | 2                  | 1.77E-01 | 2                  | 1.77E-01 | 1                  | 1.07E-01 | 1                  | 1.07E-01 |
| ESAM        | 11  | 2                  | 2.41E-01 | 3                  | 2.08E-01 | 1                  | 1.65E-01 | 2                  | 2.31E-01 | 2                  | 1.07E-01 | 3                  | 1.64E-01 |
| METTL21B    | 12  | 1                  | 9.69E-01 | 1                  | 9.69E-01 | 1                  | 1.07E-01 | 1                  | 1.07E-01 | 1                  | 1.57E-01 | 1                  | 1.57E-01 |
| ACSS1       | 20  | 2                  | 2.27E-01 | 2                  | 2.27E-01 | 2                  | 1.07E-01 | 2                  | 1.07E-01 | 3                  | 3.10E-01 | 3                  | 3.10E-01 |
| OR5A2       | 11  | 1                  | 7.35E-01 | 2                  | 7.41E-01 | 1                  | 5.06E-01 | 2                  | 5.07E-01 |                    |          | 1                  | 1.07E-01 |
| RPL3L       | 16  | 8                  | 5.67E-01 | 8                  | 5.67E-01 | 8                  | 1.08E-01 | 8                  | 1.08E-01 | 6                  | 2.93E-01 | 6                  | 2.93E-01 |
| CETP        | 16  | 3                  | 7.14E-01 | 4                  | 8.29E-01 | 2                  | 6.13E-01 | 3                  | 1.31E-01 | 1                  | 6.05E-01 | 2                  | 1.08E-01 |
| PDGFRB      | 5   | 5                  | 5.93E-01 | 5                  | 5.93E-01 | 5                  | 2.93E-01 | 5                  | 2.93E-01 | 2                  | 1.08E-01 | 2                  | 1.08E-01 |
| NMRK2       | 19  | 1                  | 9.44E-01 | 1                  | 9.44E-01 | 1                  | 1.08E-01 | 1                  | 1.08E-01 | 1                  | 2.02E-01 | 1                  | 2.02E-01 |
| CRYBA4      | 22  | 1                  | 3.82E-01 | 1                  | 3.82E-01 | 1                  | 1.08E-01 | 1                  | 1.08E-01 | 1                  | 3.28E-01 | 1                  | 3.28E-01 |
| ZNF804B     | 7   | 4                  | 5.20E-02 | 4                  | 5.20E-02 | 2                  | 1.08E-01 | 2                  | 1.08E-01 | 4                  | 3.87E-01 | 4                  | 3.87E-01 |
| C8orf86     | 8   | 2                  | 6.07E-01 | 2                  | 6.07E-01 | 3                  | 1.08E-01 | 3                  | 1.08E-01 | 3                  | 1.09E-01 | 3                  | 1.09E-01 |
| ZNF415      | 19  | 2                  | 8.11E-01 | 2                  | 8.11E-01 | 2                  | 1.44E-01 | 2                  | 1.44E-01 | 1                  | 1.08E-01 | 1                  | 1.08E-01 |
| PACS2       | 14  | 2                  | 6.56E-01 | 2                  | 6.56E-01 | 1                  | 1.08E-01 | 1                  | 1.08E-01 | 2                  | 3.88E-01 | 2                  | 3.88E-01 |
| TRPM6       | 9   | 10                 | 7.16E-01 | 10                 | 7.16E-01 | 9                  | 1.08E-01 | 9                  | 1.08E-01 | 5                  | 2.09E-01 | 5                  | 2.09E-01 |
| CHRNA3      | 15  | 3                  | 3.90E-01 | 3                  | 3.90E-01 | 3                  | 2.41E-01 | 3                  | 2.41E-01 | 1                  | 1.08E-01 | 1                  | 1.08E-01 |
| C2orf16     | 2   | 9                  | 8.14E-04 | 10                 | 8.14E-04 | 9                  | 2.24E-01 | 10                 | 2.24E-01 | 3                  | 1.08E-01 | 4                  | 1.09E-01 |
| HYAL4       | 7   | 3                  | 1.01E-01 | 3                  | 1.01E-01 | 2                  | 1.09E-01 | 2                  | 1.09E-01 | 3                  | 7.13E-01 | 3                  | 7.13E-01 |
| HSD3B7      | 16  | 3                  | 1.00E+00 | 3                  | 1.00E+00 | 3                  | 1.09E-01 | 3                  | 1.09E-01 | 2                  | 1.40E-01 | 2                  | 1.40E-01 |
| SDR39U1     | 14  | 4                  | 3.92E-01 | 4                  | 3.92E-01 | 4                  | 1.09E-01 | 4                  | 1.09E-01 | 3                  | 2.07E-01 | 3                  | 2.07E-01 |

| SetID        | Chr | ADEH- vs NA        |          |                    |          | ADEH+ vs ADEH-     |          |                    |          | ADEH+ vs NA        |          |                    |          |
|--------------|-----|--------------------|----------|--------------------|----------|--------------------|----------|--------------------|----------|--------------------|----------|--------------------|----------|
|              |     | rarenovel          |          | all                |          | rarenovel          |          | all                |          | rarenovel          |          | all                |          |
|              |     | N variants in test | p-value  | N variants in test | p-value  | N variants in test | p-value  | N variants in test | p-value  | N variants in test | p-value  | N variants in test | p-value  |
| SLIT2        | 4   | 3                  | 5.63E-01 | 3                  | 5.63E-01 | 3                  | 1.66E-01 | 3                  | 1.66E-01 | 2                  | 1.09E-01 | 2                  | 1.09E-01 |
| IGFLR1       | 19  | 2                  | 7.47E-01 | 2                  | 7.47E-01 | 2                  | 1.42E-01 | 2                  | 1.42E-01 | 2                  | 1.09E-01 | 2                  | 1.09E-01 |
| IL12B        | 5   | 1                  | 4.65E-01 | 1                  | 4.65E-01 | 2                  | 1.14E-01 | 2                  | 1.14E-01 | 2                  | 1.09E-01 | 2                  | 1.09E-01 |
| RIOK3        | 18  | 2                  | 8.16E-02 | 2                  | 8.16E-02 | 2                  | 1.09E-01 | 2                  | 1.09E-01 | 3                  | 2.51E-01 | 3                  | 2.51E-01 |
| MUM1         | 19  | 1                  | 1.35E-01 | 1                  | 1.35E-01 | 1                  | 1.75E-01 | 1                  | 1.75E-01 | 1                  | 1.09E-01 | 1                  | 1.09E-01 |
| PLIN5        | 19  | 3                  | 2.63E-01 | 4                  | 2.63E-01 | 4                  | 1.09E-01 | 5                  | 1.10E-01 | 2                  | 1.92E-01 | 3                  | 1.94E-01 |
| ANKRD22      | 10  | 1                  | 9.22E-01 | 1                  | 9.22E-01 | 1                  | 1.10E-01 | 1                  | 1.10E-01 | 1                  | 1.49E-01 | 1                  | 1.49E-01 |
| LRRK1        | 15  | 6                  | 3.58E-01 | 6                  | 3.58E-01 | 3                  | 1.10E-01 | 3                  | 1.10E-01 | 4                  | 4.15E-01 | 4                  | 4.15E-01 |
| ATF6B        | 6   | 3                  | 5.25E-01 | 3                  | 5.25E-01 | 3                  | 1.10E-01 | 3                  | 1.10E-01 | 2                  | 2.56E-01 | 2                  | 2.56E-01 |
| STEAP3       | 2   | 2                  | 3.53E-01 | 2                  | 3.53E-01 | 2                  | 1.10E-01 | 2                  | 1.10E-01 | 2                  | 1.75E-01 | 2                  | 1.75E-01 |
| SNAPC2       | 19  | 1                  | 7.54E-01 | 2                  | 7.54E-01 | 1                  | 4.66E-01 | 2                  | 4.66E-01 |                    |          | 1                  | 1.10E-01 |
| CHD6         | 20  | 1                  | 5.10E-01 | 1                  | 5.10E-01 | 2                  | 1.10E-01 | 2                  | 1.10E-01 | 2                  | 1.51E-01 | 2                  | 1.51E-01 |
| ATRN         | 20  | 1                  | 7.49E-02 | 1                  | 7.49E-02 | 1                  | 1.41E-01 | 1                  | 1.41E-01 | 1                  | 1.10E-01 | 1                  | 1.10E-01 |
| CREB3        | 9   | 6                  | 7.56E-01 | 6                  | 7.56E-01 | 6                  | 1.95E-01 | 6                  | 1.95E-01 | 3                  | 1.10E-01 | 3                  | 1.10E-01 |
| TRIM7        | 5   | 1                  | 8.05E-01 | 1                  | 8.05E-01 | 2                  | 1.10E-01 | 2                  | 1.10E-01 | 2                  | 1.71E-01 | 2                  | 1.71E-01 |
| C15orf40     | 15  | 2                  | 3.17E-01 | 2                  | 3.17E-01 | 2                  | 1.65E-01 | 2                  | 1.65E-01 | 1                  | 1.11E-01 | 1                  | 1.11E-01 |
| ACAN         | 15  | 4                  | 2.43E-01 | 4                  | 2.43E-01 | 5                  | 1.64E-01 | 5                  | 1.64E-01 | 3                  | 1.11E-01 | 3                  | 1.11E-01 |
| PRSS23       | 11  | 3                  | 8.21E-01 | 3                  | 8.21E-01 | 2                  | 1.45E-01 | 2                  | 1.45E-01 | 2                  | 1.11E-01 | 2                  | 1.11E-01 |
| UGT1A6       | 2   | 3                  | 5.96E-01 | 3                  | 5.96E-01 | 3                  | 1.22E-01 | 3                  | 1.22E-01 | 2                  | 1.11E-01 | 2                  | 1.11E-01 |
| LRRC15       | 3   | 1                  | 7.50E-01 | 2                  | 7.14E-01 | 1                  | 4.47E-01 | 2                  | 4.54E-01 |                    |          | 1                  | 1.11E-01 |
| PDE8A        | 15  | 4                  | 4.96E-01 | 4                  | 4.96E-01 | 3                  | 1.11E-01 | 3                  | 1.11E-01 | 3                  | 1.26E-01 | 3                  | 1.26E-01 |
| KCNMB3       | 3   |                    |          | 1                  | 4.99E-01 |                    |          | 1                  | 1.11E-01 |                    |          | 1                  | 2.60E-01 |
| CDSN         | 6   | 4                  | 1.35E-01 | 4                  | 1.35E-01 | 4                  | 2.83E-01 | 4                  | 2.83E-01 | 4                  | 1.11E-01 | 4                  | 1.11E-01 |
| TAAR2        | 6   | 2                  | 3.94E-01 | 2                  | 3.94E-01 | 1                  | 1.19E-01 | 1                  | 1.19E-01 | 2                  | 1.11E-01 | 2                  | 1.11E-01 |
| INSL3        | 19  | 1                  | 5.18E-01 | 1                  | 5.18E-01 | 1                  | 1.11E-01 | 1                  | 1.11E-01 | 1                  | 4.62E-01 | 1                  | 4.62E-01 |
| CIZ1         | 9   | 3                  | 7.81E-01 | 3                  | 7.81E-01 | 3                  | 1.11E-01 | 3                  | 1.11E-01 | 2                  | 1.19E-01 | 2                  | 1.19E-01 |
| LCA5L        | 21  | 4                  | 7.18E-01 | 4                  | 7.18E-01 | 3                  | 1.12E-01 | 3                  | 1.12E-01 | 2                  | 2.04E-01 | 2                  | 2.04E-01 |
| SVOPL        | 7   | 7                  | 6.85E-01 | 7                  | 6.85E-01 | 6                  | 2.07E-01 | 6                  | 2.07E-01 | 5                  | 1.12E-01 | 5                  | 1.12E-01 |
| AXIN2        | 17  | 4                  | 8.19E-01 | 4                  | 8.19E-01 | 5                  | 2.74E-01 | 5                  | 2.74E-01 | 2                  | 1.12E-01 | 2                  | 1.12E-01 |
| TRIM6-TRIM34 | 11  | 3                  | 3.06E-01 | 3                  | 3.06E-01 | 3                  | 1.58E-01 | 3                  | 1.58E-01 | 2                  | 1.12E-01 | 2                  | 1.12E-01 |
| ASIC4        | 2   | 2                  | 6.18E-02 | 2                  | 6.18E-02 | 1                  | 1.12E-01 | 1                  | 1.12E-01 | 2                  | 1.00E+00 | 2                  | 1.00E+00 |
| PDGFB        | 22  | 2                  | 7.23E-01 | 2                  | 7.23E-01 | 1                  | 1.12E-01 | 1                  | 1.12E-01 | 2                  | 2.53E-01 | 2                  | 2.53E-01 |
| MBD4         | 3   | 1                  | 1.00E+00 | 1                  | 1.00E+00 | 1                  | 1.23E-01 | 1                  | 1.23E-01 | 1                  | 1.12E-01 | 1                  | 1.12E-01 |
| TBC1D32      | 6   | 6                  | 5.70E-01 | 6                  | 5.70E-01 | 4                  | 1.12E-01 | 4                  | 1.12E-01 | 5                  | 3.18E-01 | 5                  | 3.18E-01 |
| ST8SIA6      | 10  | 2                  | 3.44E-01 | 2                  | 3.44E-01 | 3                  | 1.53E-01 | 3                  | 1.53E-01 | 2                  | 1.12E-01 | 2                  | 1.12E-01 |
| KRT33B       | 17  | 3                  | 1.00E+00 | 4                  | 1.00E+00 | 3                  | 1.60E-01 | 4                  | 1.14E-01 | 2                  | 1.47E-01 | 3                  | 1.12E-01 |
| DONSON       | 21  | 5                  | 7.74E-01 | 5                  | 7.74E-01 | 5                  | 1.13E-01 | 5                  | 1.13E-01 | 5                  | 2.12E-01 | 5                  | 2.12E-01 |
| INSR         | 19  | 2                  | 4.46E-01 | 2                  | 4.46E-01 | 2                  | 3.52E-01 | 2                  | 3.52E-01 | 1                  | 1.13E-01 | 1                  | 1.13E-01 |
| TRIM46       | 1   | 2                  | 7.85E-01 | 2                  | 7.85E-01 | 2                  | 1.27E-01 | 2                  | 1.27E-01 | 1                  | 1.13E-01 | 1                  | 1.13E-01 |
| POU4F2       | 4   | 2                  | 3.82E-01 | 2                  | 3.82E-01 | 2                  | 1.40E-01 | 2                  | 1.40E-01 | 1                  | 1.13E-01 | 1                  | 1.13E-01 |
| SMTNL2       | 17  | 1                  | 8.44E-01 | 1                  | 8.44E-01 | 2                  | 1.13E-01 | 2                  | 1.13E-01 | 2                  | 1.64E-01 | 2                  | 1.64E-01 |
| APMAP        | 20  | 4                  | 7.16E-01 | 4                  | 7.16E-01 | 3                  | 1.13E-01 | 3                  | 1.13E-01 | 2                  | 1.86E-01 | 2                  | 1.86E-01 |
| 8-Sep        | 5   | 1                  | 4.89E-01 | 1                  | 4.89E-01 | 2                  | 1.13E-01 | 2                  | 1.13E-01 | 2                  | 1.89E-01 | 2                  | 1.89E-01 |
| FANCI        | 15  | 6                  | 5.46E-01 | 7                  | 3.48E-01 | 3                  | 1.14E-01 | 4                  | 1.51E-01 | 4                  | 2.62E-01 | 5                  | 3.82E-01 |
| EGF          | 4   | 2                  | 5.95E-01 | 2                  | 5.95E-01 | 1                  | 1.14E-01 | 1                  | 1.14E-01 | 2                  | 3.32E-01 | 2                  | 3.32E-01 |
| RIMS2        | 8   | 7                  | 1.78E-01 | 7                  | 1.78E-01 | 5                  | 5.17E-01 | 5                  | 5.17E-01 | 5                  | 1.14E-01 | 5                  | 1.14E-01 |
| LCP2         | 5   | 1                  | 5.89E-01 | 1                  | 5.89E-01 | 1                  | 1.29E-01 | 1                  | 1.29E-01 | 1                  | 1.14E-01 | 1                  | 1.14E-01 |
| MMP21        | 10  | 2                  | 1.00E+00 | 2                  | 1.00E+00 | 2                  | 1.41E-01 | 2                  | 1.41E-01 | 1                  | 1.14E-01 | 1                  | 1.14E-01 |

| SetID    | Chr | ADEH- vs NA        |          |                    |          | ADEH+ vs ADEH-     |          |                    |          | ADEH+ vs NA        |          |                    |          |
|----------|-----|--------------------|----------|--------------------|----------|--------------------|----------|--------------------|----------|--------------------|----------|--------------------|----------|
|          |     | rarenovel          |          | all                |          | rarenovel          |          | all                |          | rarenovel          |          | all                |          |
|          |     | N variants in test | p-value  | N variants in test | p-value  | N variants in test | p-value  | N variants in test | p-value  | N variants in test | p-value  | N variants in test | p-value  |
| PLGRKT   | 9   | 1                  | 7.96E-01 | 1                  | 7.96E-01 | 1                  | 1.14E-01 | 1                  | 1.14E-01 | 1                  | 1.33E-01 | 1                  | 1.33E-01 |
| DDX51    | 12  | 3                  | 1.00E+00 | 3                  | 1.00E+00 | 4                  | 1.63E-01 | 4                  | 1.63E-01 | 2                  | 1.15E-01 | 2                  | 1.15E-01 |
| SHPRH    | 6   | 6                  | 2.75E-01 | 6                  | 2.75E-01 | 3                  | 1.15E-01 | 3                  | 1.15E-01 | 5                  | 4.93E-01 | 5                  | 4.93E-01 |
| PFKFB2   | 1   | 1                  | 8.83E-01 | 1                  | 8.83E-01 | 1                  | 1.15E-01 | 1                  | 1.15E-01 | 1                  | 2.13E-01 | 1                  | 2.13E-01 |
| DVL1     | 1   | 2                  | 3.72E-01 | 2                  | 3.72E-01 | 2                  | 1.15E-01 | 2                  | 1.15E-01 | 2                  | 1.30E-01 | 2                  | 1.30E-01 |
| ILDR1    | 3   | 2                  | 1.00E+00 | 2                  | 1.00E+00 | 3                  | 1.16E-01 | 3                  | 1.16E-01 | 2                  | 1.15E-01 | 2                  | 1.15E-01 |
| ZNF467   | 7   | 3                  | 6.90E-01 | 3                  | 6.90E-01 | 3                  | 1.15E-01 | 3                  | 1.15E-01 | 2                  | 1.24E-01 | 2                  | 1.24E-01 |
| PCNXL2   | 1   | 6                  | 6.39E-01 | 6                  | 6.39E-01 | 5                  | 1.15E-01 | 5                  | 1.15E-01 | 4                  | 2.01E-01 | 4                  | 2.01E-01 |
| METTL21C | 13  | 1                  | 7.26E-01 | 1                  | 7.26E-01 | 1                  | 1.15E-01 | 1                  | 1.15E-01 | 1                  | 5.29E-01 | 1                  | 5.29E-01 |
| DNASE1   | 16  | 7                  | 1.00E+00 | 7                  | 1.00E+00 | 5                  | 1.16E-01 | 5                  | 1.16E-01 | 5                  | 1.30E-01 | 5                  | 1.30E-01 |
| ARL11    | 13  | 4                  | 3.45E-01 | 4                  | 3.45E-01 | 3                  | 2.46E-01 | 3                  | 2.46E-01 | 3                  | 1.16E-01 | 3                  | 1.16E-01 |
| CCNT1    | 12  | 6                  | 4.30E-02 | 6                  | 4.30E-02 | 2                  | 1.16E-01 | 2                  | 1.16E-01 | 5                  | 1.00E+00 | 5                  | 1.00E+00 |
| CASC3    | 17  | 3                  | 3.09E-01 | 3                  | 3.09E-01 | 2                  | 1.16E-01 | 2                  | 1.16E-01 | 3                  | 4.52E-01 | 3                  | 4.52E-01 |
| NDUFAF2  | 5   | 1                  | 8.97E-01 | 1                  | 8.97E-01 | 1                  | 1.16E-01 | 1                  | 1.16E-01 | 1                  | 1.48E-01 | 1                  | 1.48E-01 |
| TSKU     | 11  | 1                  | 5.05E-01 | 1                  | 5.05E-01 | 2                  | 1.16E-01 | 2                  | 1.16E-01 | 2                  | 1.84E-01 | 2                  | 1.84E-01 |
| ARAP3    | 5   | 2                  | 1.00E+00 | 2                  | 1.00E+00 | 2                  | 1.38E-01 | 2                  | 1.38E-01 | 1                  | 1.16E-01 | 1                  | 1.16E-01 |
| AHCY     | 20  | 2                  | 7.57E-01 | 2                  | 7.57E-01 | 1                  | 1.16E-01 | 1                  | 1.16E-01 | 2                  | 2.40E-01 | 2                  | 2.40E-01 |
| ADPRHL2  | 1   | 2                  | 9.31E-01 | 2                  | 9.31E-01 | 3                  | 1.18E-01 | 3                  | 1.18E-01 | 2                  | 1.16E-01 | 2                  | 1.16E-01 |
| CACNA1I  | 22  | 3                  | 4.54E-02 | 3                  | 4.54E-02 | 3                  | 1.17E-01 | 3                  | 1.17E-01 | 1                  | 2.83E-01 | 1                  | 2.83E-01 |
| SYNC     | 1   | 3                  | 3.37E-01 | 3                  | 3.37E-01 | 3                  | 1.17E-01 | 3                  | 1.17E-01 | 2                  | 5.62E-01 | 2                  | 5.62E-01 |
| CNOT10   | 3   | 1                  | 6.45E-01 | 1                  | 6.45E-01 | 1                  | 1.17E-01 | 1                  | 1.17E-01 | 1                  | 2.68E-01 | 1                  | 2.68E-01 |
| C9orf84  | 9   | 3                  | 4.15E-01 | 3                  | 4.15E-01 | 4                  | 2.46E-01 | 4                  | 2.46E-01 | 2                  | 1.17E-01 | 2                  | 1.17E-01 |
| MFSD3    | 8   | 2                  | 3.65E-01 | 2                  | 3.65E-01 | 2                  | 1.17E-01 | 2                  | 1.17E-01 | 2                  | 1.84E-01 | 2                  | 1.84E-01 |
| SIGLEC1  | 20  | 14                 | 2.04E-01 | 15                 | 2.44E-01 | 11                 | 4.63E-01 | 12                 | 2.78E-01 | 6                  | 1.38E-01 | 7                  | 1.17E-01 |
| CTNNA3   | 10  | 4                  | 2.52E-01 | 4                  | 2.52E-01 | 3                  | 1.17E-01 | 3                  | 1.17E-01 | 3                  | 2.49E-01 | 3                  | 2.49E-01 |
| AKR1E2   | 10  | 2                  | 1.00E+00 | 4                  | 7.86E-01 | 2                  | 1.58E-01 | 4                  | 2.41E-01 | 1                  | 1.17E-01 | 3                  | 2.10E-01 |
| PFKL     | 21  | 3                  | 4.72E-01 | 3                  | 4.72E-01 | 3                  | 1.17E-01 | 3                  | 1.17E-01 | 3                  | 1.40E-01 | 3                  | 1.40E-01 |
| DYSF     | 2   | 12                 | 6.25E-01 | 12                 | 6.25E-01 | 10                 | 2.29E-01 | 10                 | 2.29E-01 | 10                 | 1.17E-01 | 10                 | 1.17E-01 |
| GFM2     | 5   | 6                  | 4.76E-01 | 6                  | 4.76E-01 | 6                  | 1.64E-01 | 6                  | 1.64E-01 | 1                  | 1.17E-01 | 1                  | 1.17E-01 |
| FLNB     | 3   | 15                 | 3.12E-01 | 15                 | 3.12E-01 | 13                 | 7.12E-01 | 13                 | 7.12E-01 | 7                  | 1.17E-01 | 7                  | 1.17E-01 |
| CAPN3    | 15  | 3                  | 6.55E-01 | 3                  | 6.55E-01 | 3                  | 1.22E-01 | 3                  | 1.22E-01 | 2                  | 1.18E-01 | 2                  | 1.18E-01 |
| BRINP2   | 1   | 4                  | 2.72E-01 | 4                  | 2.72E-01 | 3                  | 1.18E-01 | 3                  | 1.18E-01 | 3                  | 2.73E-01 | 3                  | 2.73E-01 |
| PEX6     | 6   | 3                  | 3.85E-01 | 4                  | 3.54E-01 | 2                  | 2.42E-01 | 3                  | 1.18E-01 | 3                  | 1.00E+00 | 4                  | 4.14E-01 |
| HAP1     | 17  | 3                  | 2.24E-01 | 4                  | 2.24E-01 | 2                  | 3.25E-01 | 3                  | 3.25E-01 | 2                  | 1.18E-01 | 3                  | 1.18E-01 |
| PCDHGC5  | 5   | 3                  | 6.68E-01 | 3                  | 6.68E-01 | 3                  | 1.25E-01 | 3                  | 1.25E-01 | 2                  | 1.18E-01 | 2                  | 1.18E-01 |
| TXNDC16  | 14  | 4                  | 1.03E-01 | 4                  | 1.03E-01 | 4                  | 1.19E-01 | 4                  | 1.19E-01 | 3                  | 3.99E-01 | 3                  | 3.99E-01 |
| PIK3R3   | 1   | 1                  | 7.68E-01 | 1                  | 7.68E-01 | 2                  | 1.19E-01 | 2                  | 1.19E-01 | 2                  | 2.17E-01 | 2                  | 2.17E-01 |
| TNXB     | 6   | 14                 | 3.12E-01 | 14                 | 3.12E-01 | 10                 | 2.21E-01 | 10                 | 2.21E-01 | 11                 | 1.19E-01 | 11                 | 1.19E-01 |
| IFT140   | 16  | 9                  | 7.43E-01 | 9                  | 7.43E-01 | 8                  | 1.19E-01 | 8                  | 1.19E-01 | 4                  | 2.32E-01 | 4                  | 2.32E-01 |
| ISLR     | 15  | 2                  | 7.05E-01 | 2                  | 7.05E-01 | 2                  | 2.12E-01 | 2                  | 2.12E-01 | 1                  | 1.19E-01 | 1                  | 1.19E-01 |
| ZNF83    | 19  | 4                  | 8.36E-01 | 4                  | 8.36E-01 | 4                  | 2.19E-01 | 4                  | 2.19E-01 | 2                  | 1.19E-01 | 2                  | 1.19E-01 |
| HTRA2    | 2   | 1                  | 1.91E-01 | 1                  | 1.91E-01 | 1                  | 1.19E-01 | 1                  | 1.19E-01 | 1                  | 1.00E+00 | 1                  | 1.00E+00 |
| ST5      | 11  | 4                  | 7.49E-01 | 5                  | 7.49E-01 | 4                  | 1.80E-01 | 5                  | 1.80E-01 | 2                  | 1.19E-01 | 3                  | 1.19E-01 |
| NADK2    | 5   | 2                  | 9.23E-01 | 2                  | 9.23E-01 | 3                  | 1.19E-01 | 3                  | 1.19E-01 | 2                  | 1.28E-01 | 2                  | 1.28E-01 |
| DNAH9    | 17  | 21                 | 1.00E+00 | 22                 | 1.00E+00 | 20                 | 1.24E-01 | 21                 | 1.27E-01 | 11                 | 1.23E-01 | 12                 | 1.19E-01 |
| KAT6A    | 8   | 3                  | 4.74E-01 | 3                  | 4.74E-01 | 3                  | 1.49E-01 | 3                  | 1.49E-01 | 2                  | 1.19E-01 | 2                  | 1.19E-01 |
| UGT2A2   | 4   | 7                  | 8.40E-01 | 8                  | 6.45E-01 | 6                  | 1.52E-01 | 7                  | 1.57E-01 | 4                  | 1.63E-01 | 5                  | 1.20E-01 |
| BUD13    | 11  | 2                  | 1.15E-01 | 2                  | 1.15E-01 | 2                  | 2.21E-01 | 2                  | 2.21E-01 | 2                  | 1.20E-01 | 2                  | 1.20E-01 |

| SetID     | Chr | ADEH- vs NA        |          |                    |          | ADEH+ vs ADEH-     |          |                    |          | ADEH+ vs NA        |          |                    |          |
|-----------|-----|--------------------|----------|--------------------|----------|--------------------|----------|--------------------|----------|--------------------|----------|--------------------|----------|
|           |     | rarenovel          |          | all                |          | rarenovel          |          | all                |          | rarenovel          |          | all                |          |
|           |     | N variants in test | p-value  | N variants in test | p-value  | N variants in test | p-value  | N variants in test | p-value  | N variants in test | p-value  | N variants in test | p-value  |
| GJD4      | 10  | 2                  | 8.59E-01 | 2                  | 8.59E-01 | 2                  | 1.32E-01 | 2                  | 1.32E-01 | 1                  | 1.20E-01 | 1                  | 1.20E-01 |
| MGAM      | 7   | 5                  | 2.81E-01 | 5                  | 2.81E-01 | 5                  | 2.36E-01 | 5                  | 2.36E-01 | 2                  | 1.20E-01 | 2                  | 1.20E-01 |
| RAD52     | 12  | 4                  | 3.75E-01 | 4                  | 3.75E-01 | 4                  | 1.20E-01 | 4                  | 1.20E-01 | 4                  | 2.12E-01 | 4                  | 2.12E-01 |
| POMC      | 2   | 2                  | 9.72E-02 | 2                  | 9.72E-02 | 3                  | 3.63E-01 | 3                  | 3.63E-01 | 3                  | 1.20E-01 | 3                  | 1.20E-01 |
| EDEM3     | 1   | 2                  | 4.79E-01 | 2                  | 4.79E-01 | 2                  | 1.20E-01 | 2                  | 1.20E-01 | 1                  | 1.77E-01 | 1                  | 1.77E-01 |
| PDIA2     | 16  | 2                  | 4.11E-01 | 3                  | 4.06E-01 | 3                  | 1.20E-01 | 4                  | 1.22E-01 | 2                  | 1.42E-01 | 3                  | 1.46E-01 |
| TECPR1    | 7   | 3                  | 3.15E-01 | 3                  | 3.15E-01 | 2                  | 1.20E-01 | 2                  | 1.20E-01 | 4                  | 3.94E-01 | 4                  | 3.94E-01 |
| JMJD4     | 1   | 2                  | 8.76E-01 | 2                  | 8.76E-01 | 2                  | 1.21E-01 | 2                  | 1.21E-01 | 2                  | 2.06E-01 | 2                  | 2.06E-01 |
| AP1S3     | 2   | 2                  | 1.00E+00 | 2                  | 1.00E+00 | 2                  | 1.44E-01 | 2                  | 1.44E-01 | 2                  | 1.21E-01 | 2                  | 1.21E-01 |
| RTN4      | 2   | 8                  | 1.00E+00 | 8                  | 1.00E+00 | 7                  | 1.41E-01 | 7                  | 1.41E-01 | 5                  | 1.21E-01 | 5                  | 1.21E-01 |
| MYO3A     | 10  | 7                  | 1.10E-01 | 8                  | 2.78E-02 | 5                  | 3.10E-01 | 6                  | 2.30E-01 | 6                  | 2.27E-01 | 7                  | 1.21E-01 |
| KIF26B    | 1   | 10                 | 2.36E-03 | 10                 | 2.36E-03 | 10                 | 7.36E-01 | 10                 | 7.36E-01 | 4                  | 1.21E-01 | 4                  | 1.21E-01 |
| UVRAG     | 11  | 3                  | 6.72E-01 | 3                  | 6.72E-01 | 3                  | 1.21E-01 | 3                  | 1.21E-01 | 2                  | 1.42E-01 | 2                  | 1.42E-01 |
| SPPL2C    | 17  | 3                  | 6.23E-01 | 3                  | 6.23E-01 | 3                  | 1.21E-01 | 3                  | 1.21E-01 | 3                  | 2.97E-01 | 3                  | 2.97E-01 |
| PTX4      | 16  | 2                  | 5.80E-01 | 3                  | 3.93E-01 | 2                  | 6.22E-01 | 3                  | 4.07E-01 |                    |          | 1                  | 1.21E-01 |
| TRAF3IP3  | 1   | 1                  | 1.95E-01 | 1                  | 1.95E-01 | 1                  | 1.21E-01 | 1                  | 1.21E-01 | 1                  | 1.00E+00 | 1                  | 1.00E+00 |
| TMEM132A  | 11  | 4                  | 2.59E-01 | 4                  | 2.59E-01 | 3                  | 4.70E-01 | 3                  | 4.70E-01 | 2                  | 1.21E-01 | 2                  | 1.21E-01 |
| GOT2      | 16  | 1                  | 7.96E-01 | 1                  | 7.96E-01 | 1                  | 1.22E-01 | 1                  | 1.22E-01 | 1                  | 1.21E-01 | 1                  | 1.21E-01 |
| TNFRSF13C | 22  | 1                  | 9.63E-01 | 1                  | 9.63E-01 | 1                  | 1.35E-01 | 1                  | 1.35E-01 | 1                  | 1.22E-01 | 1                  | 1.22E-01 |
| PARK2     | 6   | 3                  | 2.94E-01 | 3                  | 2.94E-01 | 3                  | 1.68E-01 | 3                  | 1.68E-01 | 2                  | 1.22E-01 | 2                  | 1.22E-01 |
| ANKRD33   | 12  | 2                  | 6.40E-01 | 2                  | 6.40E-01 | 2                  | 1.22E-01 | 2                  | 1.22E-01 | 3                  | 3.40E-01 | 3                  | 3.40E-01 |
| HTT       | 4   | 6                  | 2.47E-01 | 7                  | 5.21E-01 | 6                  | 6.87E-01 | 7                  | 8.71E-01 | 2                  | 1.22E-01 | 3                  | 3.44E-01 |
| ARHGAP30  | 1   | 4                  | 4.68E-01 | 4                  | 4.68E-01 | 5                  | 1.82E-01 | 5                  | 1.82E-01 | 2                  | 1.22E-01 | 2                  | 1.22E-01 |
| OR10J1    | 1   | 2                  | 5.33E-01 | 4                  | 5.35E-01 | 2                  | 1.22E-01 | 4                  | 1.23E-01 | 2                  | 3.81E-01 | 4                  | 3.83E-01 |
| ARSI      | 5   | 3                  | 7.17E-01 | 3                  | 7.17E-01 | 3                  | 1.23E-01 | 3                  | 1.23E-01 | 1                  | 1.77E-01 | 1                  | 1.77E-01 |
| UBXN11    | 1   | 4                  | 2.64E-01 | 4                  | 2.64E-01 | 4                  | 3.60E-01 | 4                  | 3.60E-01 | 2                  | 1.23E-01 | 2                  | 1.23E-01 |
| MADD      | 11  | 5                  | 1.22E-01 | 6                  | 3.34E-01 | 3                  | 1.23E-01 | 4                  | 1.43E-01 | 4                  | 4.95E-01 | 5                  | 5.95E-01 |
| NOS1      | 12  | 5                  | 7.92E-01 | 5                  | 7.92E-01 | 5                  | 2.82E-01 | 5                  | 2.82E-01 | 2                  | 1.23E-01 | 2                  | 1.23E-01 |
| ASB16     | 17  | 3                  | 3.90E-01 | 3                  | 3.90E-01 | 4                  | 1.23E-01 | 4                  | 1.23E-01 | 2                  | 2.93E-01 | 2                  | 2.93E-01 |
| DYRK4     | 12  | 2                  | 7.14E-01 | 2                  | 7.14E-01 | 2                  | 1.23E-01 | 2                  | 1.23E-01 | 3                  | 3.05E-01 | 3                  | 3.05E-01 |
| ALOX15    | 17  | 3                  | 2.67E-01 | 3                  | 2.67E-01 | 3                  | 1.24E-01 | 3                  | 1.24E-01 | 2                  | 1.91E-01 | 2                  | 1.91E-01 |
| TARM1     | 19  | 2                  | 3.01E-01 | 3                  | 6.32E-01 | 1                  | 1.24E-01 | 2                  | 1.33E-01 | 2                  | 1.38E-01 | 3                  | 1.38E-01 |
| FAF1      | 1   | 1                  | 1.41E-01 | 1                  | 1.41E-01 | 1                  | 1.00E+00 | 1                  | 1.00E+00 | 1                  | 1.24E-01 | 1                  | 1.24E-01 |
| PTPRN2    | 7   | 4                  | 1.48E-03 | 4                  | 1.48E-03 | 2                  | 1.24E-01 | 2                  | 1.24E-01 | 5                  | 4.06E-01 | 5                  | 4.06E-01 |
| GAPVD1    | 9   | 1                  | 9.14E-01 | 1                  | 9.14E-01 | 2                  | 1.24E-01 | 2                  | 1.24E-01 | 2                  | 1.74E-01 | 2                  | 1.74E-01 |
| ENPP1     | 6   | 7                  | 6.73E-01 | 7                  | 6.73E-01 | 6                  | 1.24E-01 | 6                  | 1.24E-01 | 2                  | 3.46E-01 | 2                  | 3.46E-01 |
| SORBS3    | 8   | 7                  | 2.60E-01 | 7                  | 2.60E-01 | 7                  | 4.08E-01 | 7                  | 4.08E-01 | 2                  | 1.24E-01 | 2                  | 1.24E-01 |
| NPHS1     | 19  | 1                  | 7.65E-01 | 1                  | 7.65E-01 | 1                  | 1.25E-01 | 1                  | 1.25E-01 | 1                  | 1.92E-01 | 1                  | 1.92E-01 |
| UTP20     | 12  | 18                 | 5.16E-01 | 19                 | 5.16E-01 | 18                 | 1.53E-01 | 19                 | 1.50E-01 | 11                 | 1.28E-01 | 12                 | 1.25E-01 |
| ZSCAN18   | 19  | 3                  | 2.98E-01 | 3                  | 2.98E-01 | 3                  | 1.73E-01 | 3                  | 1.73E-01 | 2                  | 1.25E-01 | 2                  | 1.25E-01 |
| MBD5      | 2   | 4                  | 6.69E-01 | 4                  | 6.69E-01 | 3                  | 2.71E-01 | 3                  | 2.71E-01 | 2                  | 1.25E-01 | 2                  | 1.25E-01 |
| CIT       | 12  | 3                  | 6.71E-01 | 3                  | 6.71E-01 | 3                  | 1.25E-01 | 3                  | 1.25E-01 | 3                  | 2.55E-01 | 3                  | 2.55E-01 |
| RASSF6    | 4   | 5                  | 2.71E-01 | 5                  | 2.71E-01 | 4                  | 6.55E-01 | 4                  | 6.55E-01 | 2                  | 1.25E-01 | 2                  | 1.25E-01 |
| DUPD1     | 10  | 1                  | 7.61E-01 | 2                  | 8.74E-01 | 1                  | 5.06E-01 | 2                  | 1.83E-01 |                    |          | 1                  | 1.25E-01 |
| EDDM3A    | 14  | 1                  | 8.23E-01 | 2                  | 1.00E+00 | 1                  | 3.03E-01 | 2                  | 1.25E-01 | 1                  | 3.34E-01 | 2                  | 1.44E-01 |
| HLA-DMA   | 6   | 3                  | 1.38E-01 | 3                  | 1.38E-01 | 3                  | 3.11E-01 | 3                  | 3.11E-01 | 3                  | 1.25E-01 | 3                  | 1.25E-01 |
| WDR87     | 19  | 7                  | 6.30E-01 | 7                  | 6.30E-01 | 9                  | 2.19E-01 | 9                  | 2.19E-01 | 4                  | 1.25E-01 | 4                  | 1.25E-01 |
| BAZ2B     | 2   | 8                  | 6.47E-01 | 8                  | 6.47E-01 | 7                  | 1.25E-01 | 7                  | 1.25E-01 | 6                  | 1.63E-01 | 6                  | 1.63E-01 |

| SetID    | Chr | ADEH- vs NA        |          |                    |          | ADEH+ vs ADEH-     |          |                    |          | ADEH+ vs NA        |          |                    |          |
|----------|-----|--------------------|----------|--------------------|----------|--------------------|----------|--------------------|----------|--------------------|----------|--------------------|----------|
|          |     | rarenovel          |          | all                |          | rarenovel          |          | all                |          | rarenovel          |          | all                |          |
|          |     | N variants in test | p-value  | N variants in test | p-value  | N variants in test | p-value  | N variants in test | p-value  | N variants in test | p-value  | N variants in test | p-value  |
| MYH15    | 3   | 5                  | 3.43E-01 | 7                  | 3.43E-01 | 5                  | 1.26E-01 | 7                  | 1.26E-01 | 6                  | 2.44E-01 | 8                  | 2.44E-01 |
| ANKRD45  | 1   | 1                  | 1.00E+00 | 1                  | 1.00E+00 | 1                  | 1.26E-01 | 1                  | 1.26E-01 | 1                  | 2.34E-01 | 1                  | 2.34E-01 |
| C19orf57 | 19  | 2                  | 8.01E-02 | 2                  | 8.01E-02 | 2                  | 1.00E+00 | 2                  | 1.00E+00 | 1                  | 1.26E-01 | 1                  | 1.26E-01 |
| C21orf58 | 21  | 1                  | 8.48E-01 | 2                  | 1.00E+00 | 2                  | 1.26E-01 | 3                  | 1.26E-01 | 2                  | 1.86E-01 | 3                  | 1.86E-01 |
| TARSL2   | 15  | 2                  | 3.19E-01 | 2                  | 3.19E-01 | 3                  | 1.26E-01 | 3                  | 1.26E-01 | 2                  | 1.77E-01 | 2                  | 1.77E-01 |
| HPS3     | 3   | 5                  | 7.83E-01 | 5                  | 7.83E-01 | 4                  | 3.06E-01 | 4                  | 3.06E-01 | 2                  | 1.26E-01 | 2                  | 1.26E-01 |
| FPGS     | 9   | 4                  | 2.49E-02 | 4                  | 2.49E-02 | 4                  | 1.51E-01 | 4                  | 1.51E-01 | 2                  | 1.27E-01 | 2                  | 1.27E-01 |
| RALGAPA2 | 20  | 6                  | 5.93E-01 | 6                  | 5.93E-01 | 6                  | 3.39E-01 | 6                  | 3.39E-01 | 2                  | 1.27E-01 | 2                  | 1.27E-01 |
| FGL1     | 8   | 7                  | 1.97E-01 | 7                  | 1.97E-01 | 8                  | 1.27E-01 | 8                  | 1.27E-01 | 4                  | 1.97E-01 | 4                  | 1.97E-01 |
| CDH19    | 18  | 4                  | 8.50E-01 | 4                  | 8.50E-01 | 4                  | 2.15E-01 | 4                  | 2.15E-01 | 1                  | 1.27E-01 | 1                  | 1.27E-01 |
| DTNA     | 18  | 4                  | 8.35E-02 | 4                  | 8.35E-02 | 2                  | 1.27E-01 | 2                  | 1.27E-01 | 4                  | 4.22E-01 | 4                  | 4.22E-01 |
| FZD6     | 8   | 3                  | 4.01E-01 | 3                  | 4.01E-01 | 3                  | 1.00E+00 | 3                  | 1.00E+00 | 1                  | 1.27E-01 | 1                  | 1.27E-01 |
| ZNF398   | 7   | 2                  | 9.24E-01 | 2                  | 9.24E-01 | 2                  | 1.28E-01 | 2                  | 1.28E-01 | 1                  | 1.75E-01 | 1                  | 1.75E-01 |
| RSRP1    | 1   | 4                  | 3.33E-01 | 4                  | 3.33E-01 | 4                  | 1.28E-01 | 4                  | 1.28E-01 | 3                  | 1.56E-01 | 3                  | 1.56E-01 |
| MTO1     | 6   | 3                  | 9.08E-01 | 3                  | 9.08E-01 | 4                  | 1.94E-01 | 4                  | 1.94E-01 | 2                  | 1.28E-01 | 2                  | 1.28E-01 |
| ZNF347   | 19  | 6                  | 3.53E-01 | 6                  | 3.53E-01 | 6                  | 3.81E-01 | 6                  | 3.81E-01 | 2                  | 1.28E-01 | 2                  | 1.28E-01 |
| FBN1     | 15  | 3                  | 6.63E-01 | 3                  | 6.63E-01 | 3                  | 1.45E-01 | 3                  | 1.45E-01 | 2                  | 1.28E-01 | 2                  | 1.28E-01 |
| SEMA6C   | 1   | 3                  | 4.76E-01 | 3                  | 4.76E-01 | 3                  | 1.65E-01 | 3                  | 1.65E-01 | 2                  | 1.28E-01 | 2                  | 1.28E-01 |
| KRTAP3-2 | 17  | 1                  | 8.06E-01 | 2                  | 1.00E+00 | 2                  | 1.28E-01 | 3                  | 1.28E-01 | 2                  | 1.74E-01 | 3                  | 1.74E-01 |
| ADRA1A   | 8   | 2                  | 1.00E+00 | 2                  | 1.00E+00 | 2                  | 1.28E-01 | 2                  | 1.28E-01 | 1                  | 1.33E-01 | 1                  | 1.33E-01 |
| CDC42BPA | 1   | 5                  | 1.38E-01 | 5                  | 1.38E-01 | 3                  | 1.28E-01 | 3                  | 1.28E-01 | 4                  | 4.03E-01 | 4                  | 4.03E-01 |
| GAMT     | 19  | 1                  | 4.00E-01 | 1                  | 4.00E-01 | 2                  | 1.28E-01 | 2                  | 1.28E-01 | 2                  | 1.97E-01 | 2                  | 1.97E-01 |
| HOMER2   | 15  | 1                  | 3.61E-01 | 1                  | 3.61E-01 | 2                  | 1.28E-01 | 2                  | 1.28E-01 | 2                  | 1.59E-01 | 2                  | 1.59E-01 |
| RALGAPA1 | 14  | 3                  | 8.42E-01 | 3                  | 8.42E-01 | 3                  | 1.28E-01 | 3                  | 1.28E-01 | 1                  | 2.23E-01 | 1                  | 2.23E-01 |
| FAF2     | 5   | 4                  | 2.67E-01 | 4                  | 2.67E-01 | 3                  | 1.29E-01 | 3                  | 1.29E-01 | 2                  | 3.70E-01 | 2                  | 3.70E-01 |
| PCDHGA5  | 5   | 3                  | 1.38E-01 | 3                  | 1.38E-01 | 2                  | 1.29E-01 | 2                  | 1.29E-01 | 2                  | 4.26E-01 | 2                  | 4.26E-01 |
| ADGRL4   | 1   | 4                  | 7.77E-01 | 5                  | 7.78E-01 | 5                  | 3.09E-01 | 6                  | 3.09E-01 | 2                  | 1.29E-01 | 3                  | 1.29E-01 |
| NECAB3   | 20  | 1                  | 7.74E-01 | 1                  | 7.74E-01 | 1                  | 1.29E-01 | 1                  | 1.29E-01 | 1                  | 1.76E-01 | 1                  | 1.76E-01 |
| MAPT     | 17  | 4                  | 5.60E-02 | 6                  | 6.03E-02 | 4                  | 1.39E-01 | 6                  | 1.29E-01 | 2                  | 3.23E-01 | 4                  | 3.07E-01 |
| MRC2     | 17  | 3                  | 1.00E+00 | 3                  | 1.00E+00 | 4                  | 2.03E-01 | 4                  | 2.03E-01 | 2                  | 1.29E-01 | 2                  | 1.29E-01 |
| TREM2    | 6   | 3                  | 6.78E-01 | 3                  | 6.78E-01 | 3                  | 1.29E-01 | 3                  | 1.29E-01 | 3                  | 3.72E-01 | 3                  | 3.72E-01 |
| ZSCAN10  | 16  | 1                  | 5.39E-01 | 1                  | 5.39E-01 | 1                  | 2.61E-01 | 1                  | 2.61E-01 | 1                  | 1.29E-01 | 1                  | 1.29E-01 |
| HSP90B1  | 12  | 1                  | 1.00E+00 | 1                  | 1.00E+00 | 1                  | 1.77E-01 | 1                  | 1.77E-01 | 1                  | 1.29E-01 | 1                  | 1.29E-01 |
| ZNF221   | 19  | 2                  | 1.47E-01 | 2                  | 1.47E-01 | 3                  | 1.29E-01 | 3                  | 1.29E-01 | 3                  | 3.36E-01 | 3                  | 3.36E-01 |
| LRRN2    | 1   | 1                  | 4.75E-01 | 1                  | 4.75E-01 | 1                  | 1.85E-01 | 1                  | 1.85E-01 | 1                  | 1.29E-01 | 1                  | 1.29E-01 |
| SPPL2A   | 15  | 3                  | 5.72E-02 | 3                  | 5.72E-02 | 2                  | 1.30E-01 | 2                  | 1.30E-01 | 3                  | 4.20E-01 | 3                  | 4.20E-01 |
| KRT79    | 12  | 5                  | 4.98E-01 | 6                  | 5.01E-01 | 4                  | 3.63E-01 | 5                  | 3.63E-01 | 2                  | 1.30E-01 | 3                  | 1.30E-01 |
| DRD4     | 11  | 3                  | 6.87E-01 | 3                  | 6.87E-01 | 3                  | 1.30E-01 | 3                  | 1.30E-01 | 2                  | 1.33E-01 | 2                  | 1.33E-01 |
| ICAM1    | 19  | 4                  | 5.08E-01 | 5                  | 2.14E-01 | 3                  | 3.20E-01 | 4                  | 3.22E-01 | 2                  | 1.30E-01 | 3                  | 2.42E-01 |
| STEAP4   | 7   | 1                  | 7.83E-01 | 2                  | 8.03E-01 | 2                  | 1.30E-01 | 3                  | 1.32E-01 | 2                  | 2.60E-01 | 3                  | 2.64E-01 |
| INA      | 10  | 1                  | 3.93E-01 | 1                  | 3.93E-01 | 1                  | 1.30E-01 | 1                  | 1.30E-01 | 1                  | 2.07E-01 | 1                  | 2.07E-01 |
| LPO      | 17  | 4                  | 8.16E-01 | 4                  | 8.16E-01 | 3                  | 2.38E-01 | 3                  | 2.38E-01 | 2                  | 1.30E-01 | 2                  | 1.30E-01 |
| TGIF1    | 18  | 1                  | 7.43E-01 | 2                  | 1.22E-01 | 1                  | 1.37E-01 | 2                  | 1.88E-01 | 1                  | 2.42E-01 | 2                  | 1.30E-01 |
| UBN2     | 7   | 4                  | 7.66E-01 | 4                  | 7.66E-01 | 5                  | 2.92E-01 | 5                  | 2.92E-01 | 2                  | 1.30E-01 | 2                  | 1.30E-01 |
| DNASE2B  | 1   | 3                  | 1.00E+00 | 3                  | 1.00E+00 | 3                  | 2.82E-01 | 3                  | 2.82E-01 | 2                  | 1.30E-01 | 2                  | 1.30E-01 |
| PRTG     | 15  | 5                  | 1.07E-01 | 5                  | 1.07E-01 | 4                  | 1.00E+00 | 4                  | 1.00E+00 | 2                  | 1.30E-01 | 2                  | 1.30E-01 |
| GGA2     | 16  | 5                  | 7.28E-01 | 5                  | 7.28E-01 | 4                  | 3.00E-01 | 4                  | 3.00E-01 | 2                  | 1.31E-01 | 2                  | 1.31E-01 |
| TRIM34   | 11  | 2                  | 4.76E-01 | 2                  | 4.76E-01 | 2                  | 1.31E-01 | 2                  | 1.31E-01 | 1                  | 1.44E-01 | 1                  | 1.44E-01 |



| SetID     | Chr | ADEH- vs NA        |          |                    |          | ADEH+ vs ADEH-     |          |                    |          | ADEH+ vs NA        |          |                    |          |
|-----------|-----|--------------------|----------|--------------------|----------|--------------------|----------|--------------------|----------|--------------------|----------|--------------------|----------|
|           |     | rarenovel          |          | all                |          | rarenovel          |          | all                |          | rarenovel          |          | all                |          |
|           |     | N variants in test | p-value  | N variants in test | p-value  | N variants in test | p-value  | N variants in test | p-value  | N variants in test | p-value  | N variants in test | p-value  |
| TNK2      | 3   | 10                 | 1.00E+00 | 10                 | 1.00E+00 | 8                  | 1.57E-01 | 8                  | 1.57E-01 | 4                  | 1.31E-01 | 4                  | 1.31E-01 |
| TRPV3     | 17  | 5                  | 3.11E-01 | 5                  | 3.11E-01 | 6                  | 3.63E-01 | 6                  | 3.63E-01 | 2                  | 1.31E-01 | 2                  | 1.31E-01 |
| FAM169A   | 5   | 1                  | 1.05E-01 | 1                  | 1.05E-01 | 1                  | 1.31E-01 | 1                  | 1.31E-01 | 1                  | 4.54E-01 | 1                  | 4.54E-01 |
| PTPRT     | 20  | 3                  | 1.12E-04 | 3                  | 1.12E-04 | 2                  | 6.06E-01 | 2                  | 6.06E-01 | 1                  | 1.31E-01 | 1                  | 1.31E-01 |
| NTN3      | 16  | 3                  | 7.49E-01 | 3                  | 7.49E-01 | 4                  | 2.31E-01 | 4                  | 2.31E-01 | 2                  | 1.31E-01 | 2                  | 1.31E-01 |
| MBTPS1    | 16  | 4                  | 7.72E-01 | 4                  | 7.72E-01 | 5                  | 2.75E-01 | 5                  | 2.75E-01 | 2                  | 1.32E-01 | 2                  | 1.32E-01 |
| FAM151A   | 1   | 1                  | 1.87E-01 | 1                  | 1.87E-01 | 1                  | 1.84E-01 | 1                  | 1.84E-01 | 1                  | 1.32E-01 | 1                  | 1.32E-01 |
| CLPX      | 15  | 3                  | 5.69E-01 | 3                  | 5.69E-01 | 3                  | 3.22E-01 | 3                  | 3.22E-01 | 2                  | 1.32E-01 | 2                  | 1.32E-01 |
| PPEF2     | 4   | 5                  | 7.77E-01 | 5                  | 7.77E-01 | 5                  | 2.77E-01 | 5                  | 2.77E-01 | 2                  | 1.32E-01 | 2                  | 1.32E-01 |
| SLC12A4   | 16  | 10                 | 6.81E-01 | 10                 | 6.81E-01 | 9                  | 3.24E-01 | 9                  | 3.24E-01 | 4                  | 1.32E-01 | 4                  | 1.32E-01 |
| TRIM31    | 6   | 3                  | 6.69E-01 | 3                  | 6.69E-01 | 3                  | 2.97E-01 | 3                  | 2.97E-01 | 1                  | 1.32E-01 | 1                  | 1.32E-01 |
| ZEB1      | 10  | 1                  | 4.37E-01 | 1                  | 4.37E-01 | 2                  | 1.32E-01 | 2                  | 1.32E-01 | 2                  | 1.58E-01 | 2                  | 1.58E-01 |
| MYL5      | 4   | 3                  | 5.28E-01 | 3                  | 5.28E-01 | 2                  | 1.32E-01 | 2                  | 1.32E-01 | 3                  | 2.39E-01 | 3                  | 2.39E-01 |
| TEX40     | 11  | 2                  | 4.37E-01 | 2                  | 4.37E-01 | 2                  | 1.32E-01 | 2                  | 1.32E-01 | 1                  | 1.68E-01 | 1                  | 1.68E-01 |
| TRPM5     | 11  | 5                  | 3.00E-01 | 5                  | 3.00E-01 | 4                  | 5.39E-01 | 4                  | 5.39E-01 | 2                  | 1.32E-01 | 2                  | 1.32E-01 |
| TRIM10    | 6   | 4                  | 7.40E-01 | 4                  | 7.40E-01 | 4                  | 1.55E-01 | 4                  | 1.55E-01 | 1                  | 1.32E-01 | 1                  | 1.32E-01 |
| MED12L    | 3   | 2                  | 8.18E-01 | 2                  | 8.18E-01 | 2                  | 1.32E-01 | 2                  | 1.32E-01 | 3                  | 2.54E-01 | 3                  | 2.54E-01 |
| PLA2G2D   | 1   | 1                  | 5.71E-01 | 1                  | 5.71E-01 | 1                  | 1.87E-01 | 1                  | 1.87E-01 | 1                  | 1.33E-01 | 1                  | 1.33E-01 |
| SCNN1A    | 12  | 2                  | 2.64E-01 | 2                  | 2.64E-01 | 2                  | 1.33E-01 | 2                  | 1.33E-01 | 1                  | 2.15E-01 | 1                  | 2.15E-01 |
| STX11     | 6   | 2                  | 1.88E-01 | 2                  | 1.88E-01 | 2                  | 1.33E-01 | 2                  | 1.33E-01 | 2                  | 6.92E-01 | 2                  | 6.92E-01 |
| GLDN      | 15  | 5                  | 4.31E-01 | 5                  | 4.31E-01 | 5                  | 5.05E-01 | 5                  | 5.05E-01 | 2                  | 1.33E-01 | 2                  | 1.33E-01 |
| SCNM1     | 1   | 2                  | 6.22E-02 | 2                  | 6.22E-02 | 1                  | 1.33E-01 | 1                  | 1.33E-01 | 2                  | 1.86E-01 | 2                  | 1.86E-01 |
| GYS2      | 12  | 4                  | 6.44E-01 | 4                  | 6.44E-01 | 4                  | 2.23E-01 | 4                  | 2.23E-01 | 2                  | 1.33E-01 | 2                  | 1.33E-01 |
| OR11H4    | 14  | 4                  | 1.99E-01 | 4                  | 1.99E-01 | 4                  | 5.98E-01 | 4                  | 5.98E-01 | 2                  | 1.33E-01 | 2                  | 1.33E-01 |
| RNF135    | 17  | 1                  | 7.18E-01 | 1                  | 7.18E-01 | 1                  | 1.61E-01 | 1                  | 1.61E-01 | 1                  | 1.33E-01 | 1                  | 1.33E-01 |
| GATA5     | 20  | 2                  | 1.69E-01 | 2                  | 1.69E-01 | 2                  | 2.74E-01 | 2                  | 2.74E-01 | 2                  | 1.33E-01 | 2                  | 1.33E-01 |
| SLC22A18  | 11  | 4                  | 5.95E-01 | 4                  | 5.95E-01 | 3                  | 3.30E-01 | 3                  | 3.30E-01 | 4                  | 1.33E-01 | 4                  | 1.33E-01 |
| CCDC14    | 3   | 3                  | 1.00E+00 | 3                  | 1.00E+00 | 3                  | 2.15E-01 | 3                  | 2.15E-01 | 1                  | 1.33E-01 | 1                  | 1.33E-01 |
| TMEM8B    | 9   | 3                  | 6.18E-01 | 3                  | 6.18E-01 | 2                  | 1.33E-01 | 2                  | 1.33E-01 | 2                  | 4.46E-01 | 2                  | 4.46E-01 |
| ZIC4      | 3   | 2                  | 4.47E-01 | 2                  | 4.47E-01 | 2                  | 1.34E-01 | 2                  | 1.34E-01 | 2                  | 2.61E-01 | 2                  | 2.61E-01 |
| SPATA31E1 | 9   | 4                  | 6.29E-01 | 4                  | 6.29E-01 | 3                  | 3.50E-01 | 3                  | 3.50E-01 | 2                  | 1.34E-01 | 2                  | 1.34E-01 |
| DLL3      | 19  | 4                  | 2.58E-01 | 5                  | 4.62E-01 | 2                  | 1.34E-01 | 3                  | 2.37E-01 | 3                  | 4.62E-01 | 4                  | 4.16E-01 |
| HIP1R     | 12  | 10                 | 1.95E-01 | 10                 | 1.95E-01 | 7                  | 4.72E-01 | 7                  | 4.72E-01 | 5                  | 1.34E-01 | 5                  | 1.34E-01 |
| MFS10     | 4   | 3                  | 7.53E-01 | 3                  | 7.53E-01 | 3                  | 1.34E-01 | 3                  | 1.34E-01 | 1                  | 1.46E-01 | 1                  | 1.46E-01 |
| OR7C2     | 19  | 2                  | 1.73E-01 | 2                  | 1.73E-01 | 2                  | 3.07E-01 | 2                  | 3.07E-01 | 1                  | 1.35E-01 | 1                  | 1.35E-01 |
| 7-Mar     | 2   | 3                  | 7.77E-01 | 3                  | 7.77E-01 | 3                  | 1.35E-01 | 3                  | 1.35E-01 | 2                  | 1.89E-01 | 2                  | 1.89E-01 |
| CHRDL2    | 11  | 1                  | 1.55E-02 | 1                  | 1.55E-02 | 1                  | 1.35E-01 | 1                  | 1.35E-01 | 1                  | 4.58E-01 | 1                  | 4.58E-01 |
| ANKMY1    | 2   | 5                  | 6.94E-01 | 5                  | 6.94E-01 | 5                  | 1.35E-01 | 5                  | 1.35E-01 | 5                  | 1.37E-01 | 5                  | 1.37E-01 |
| RBFA      | 18  | 2                  | 6.85E-01 | 2                  | 6.85E-01 | 2                  | 2.01E-01 | 2                  | 2.01E-01 | 1                  | 1.35E-01 | 1                  | 1.35E-01 |
| EHMT1     | 9   | 5                  | 7.04E-01 | 5                  | 7.04E-01 | 6                  | 1.36E-01 | 6                  | 1.36E-01 | 3                  | 1.76E-01 | 3                  | 1.76E-01 |
| OR52J3    | 11  | 3                  | 9.26E-01 | 5                  | 1.00E+00 | 3                  | 2.50E-01 | 5                  | 2.57E-01 | 2                  | 1.36E-01 | 4                  | 1.41E-01 |
| TOX3      | 16  | 2                  | 4.20E-01 | 2                  | 4.20E-01 | 1                  | 1.36E-01 | 1                  | 1.36E-01 | 2                  | 6.54E-01 | 2                  | 6.54E-01 |
| VNN3      | 6   |                    |          | 1                  | 3.12E-01 |                    |          | 1                  | 1.36E-01 |                    |          | 1                  | 3.58E-01 |
| DNAH17    | 17  | 4                  | 4.54E-01 | 4                  | 4.54E-01 | 2                  | 1.36E-01 | 2                  | 1.36E-01 | 3                  | 1.38E-01 | 3                  | 1.38E-01 |
| TRAPP11   | 4   | 3                  | 5.77E-01 | 4                  | 6.63E-01 | 3                  | 1.36E-01 | 4                  | 1.45E-01 | 2                  | 1.42E-01 | 3                  | 1.53E-01 |
| LAMC3     | 9   | 9                  | 2.56E-01 | 10                 | 4.14E-01 | 5                  | 2.26E-01 | 6                  | 4.08E-01 | 6                  | 1.36E-01 | 7                  | 2.49E-01 |
| TRIM67    | 1   | 4                  | 1.15E-01 | 4                  | 1.15E-01 | 2                  | 1.36E-01 | 2                  | 1.36E-01 | 3                  | 8.94E-01 | 3                  | 8.94E-01 |
| SHMT2     | 12  | 3                  | 6.37E-01 | 3                  | 6.37E-01 | 3                  | 1.36E-01 | 3                  | 1.36E-01 | 2                  | 1.40E-01 | 2                  | 1.40E-01 |

| SetID    | Chr | ADEH- vs NA        |          |                    |          | ADEH+ vs ADEH-     |          |                    |          | ADEH+ vs NA        |          |                    |          |
|----------|-----|--------------------|----------|--------------------|----------|--------------------|----------|--------------------|----------|--------------------|----------|--------------------|----------|
|          |     | rarenovel          |          | all                |          | rarenovel          |          | all                |          | rarenovel          |          | all                |          |
|          |     | N variants in test | p-value  | N variants in test | p-value  | N variants in test | p-value  | N variants in test | p-value  | N variants in test | p-value  | N variants in test | p-value  |
| RARRES1  | 3   | 2                  | 8.99E-02 | 2                  | 8.99E-02 | 2                  | 1.00E+00 | 2                  | 1.00E+00 | 1                  | 1.36E-01 | 1                  | 1.36E-01 |
| AK8      | 9   | 3                  | 8.65E-01 | 3                  | 8.65E-01 | 3                  | 1.37E-01 | 3                  | 1.37E-01 | 3                  | 2.40E-01 | 3                  | 2.40E-01 |
| APOBEC2  | 6   | 2                  | 6.47E-02 | 2                  | 6.47E-02 | 2                  | 1.00E+00 | 2                  | 1.00E+00 | 1                  | 1.37E-01 | 1                  | 1.37E-01 |
| PON1     | 7   | 1                  | 7.17E-02 | 2                  | 7.17E-02 |                    |          | 1                  | 1.37E-01 | 1                  | 6.01E-01 | 2                  | 6.01E-01 |
| PIWIL3   | 22  | 11                 | 7.13E-01 | 11                 | 7.13E-01 | 11                 | 1.75E-01 | 11                 | 1.75E-01 | 4                  | 1.37E-01 | 4                  | 1.37E-01 |
| C19orf71 | 19  | 3                  | 6.60E-04 | 3                  | 6.60E-04 | 3                  | 2.17E-01 | 3                  | 2.17E-01 | 4                  | 1.37E-01 | 4                  | 1.37E-01 |
| VPS53    | 17  | 3                  | 3.30E-01 | 4                  | 4.70E-01 | 3                  | 7.95E-01 | 4                  | 3.16E-01 |                    |          | 1                  | 1.37E-01 |
| ENTPD2   | 9   | 2                  | 7.35E-01 | 2                  | 7.35E-01 | 1                  | 1.37E-01 | 1                  | 1.37E-01 | 2                  | 1.84E-01 | 2                  | 1.84E-01 |
| TRPM2    | 21  | 7                  | 5.28E-01 | 7                  | 5.28E-01 | 8                  | 1.37E-01 | 8                  | 1.37E-01 | 4                  | 1.99E-01 | 4                  | 1.99E-01 |
| ECI1     | 16  | 1                  | 2.68E-01 | 1                  | 2.68E-01 | 1                  | 1.37E-01 | 1                  | 1.37E-01 | 1                  | 1.95E-01 | 1                  | 1.95E-01 |
| ZNF543   | 19  | 5                  | 7.64E-01 | 5                  | 7.64E-01 | 5                  | 2.03E-01 | 5                  | 2.03E-01 | 3                  | 1.38E-01 | 3                  | 1.38E-01 |
| APOD     | 3   | 2                  | 4.03E-01 | 2                  | 4.03E-01 | 2                  | 2.05E-01 | 2                  | 2.05E-01 | 1                  | 1.38E-01 | 1                  | 1.38E-01 |
| OSBPL5   | 11  | 4                  | 3.28E-01 | 4                  | 3.28E-01 | 2                  | 1.38E-01 | 2                  | 1.38E-01 | 3                  | 3.69E-01 | 3                  | 3.69E-01 |
| KMT2C    | 7   | 13                 | 4.35E-02 | 13                 | 4.35E-02 | 7                  | 3.54E-01 | 7                  | 3.54E-01 | 7                  | 1.38E-01 | 7                  | 1.38E-01 |
| BRWD1    | 21  | 4                  | 2.78E-01 | 5                  | 2.78E-01 | 3                  | 1.38E-01 | 4                  | 1.38E-01 | 3                  | 3.46E-01 | 4                  | 3.46E-01 |
| P2RX5    | 17  | 6                  | 9.05E-02 | 6                  | 9.05E-02 | 4                  | 2.18E-01 | 4                  | 2.18E-01 | 4                  | 1.38E-01 | 4                  | 1.38E-01 |
| GRID1    | 10  | 3                  | 1.00E+00 | 3                  | 1.00E+00 | 2                  | 1.38E-01 | 2                  | 1.38E-01 | 2                  | 1.53E-01 | 2                  | 1.53E-01 |
| UGT2A3   | 4   | 1                  | 5.07E-01 | 1                  | 5.07E-01 | 1                  | 1.38E-01 | 1                  | 1.38E-01 | 1                  | 4.69E-01 | 1                  | 4.69E-01 |
| TUT1     | 11  | 3                  | 8.03E-01 | 3                  | 8.03E-01 | 2                  | 1.48E-01 | 2                  | 1.48E-01 | 2                  | 1.39E-01 | 2                  | 1.39E-01 |
| GKN2     | 2   | 1                  | 1.00E+00 | 1                  | 1.00E+00 | 1                  | 1.39E-01 | 1                  | 1.39E-01 | 1                  | 1.64E-01 | 1                  | 1.64E-01 |
| BARD1    | 2   | 3                  | 7.25E-02 | 3                  | 7.25E-02 | 4                  | 1.96E-01 | 4                  | 1.96E-01 | 2                  | 1.39E-01 | 2                  | 1.39E-01 |
| TET2     | 4   | 9                  | 3.47E-01 | 9                  | 3.47E-01 | 8                  | 2.62E-01 | 8                  | 2.62E-01 | 4                  | 1.39E-01 | 4                  | 1.39E-01 |
| TAAR6    | 6   | 5                  | 3.18E-01 | 5                  | 3.18E-01 | 3                  | 1.39E-01 | 3                  | 1.39E-01 | 5                  | 4.67E-01 | 5                  | 4.67E-01 |
| HK2      | 2   | 5                  | 1.19E-02 | 5                  | 1.19E-02 | 1                  | 1.40E-01 | 1                  | 1.40E-01 | 5                  | 6.84E-01 | 5                  | 6.84E-01 |
| NDC80    | 18  | 3                  | 7.14E-01 | 3                  | 7.14E-01 | 3                  | 1.40E-01 | 3                  | 1.40E-01 | 1                  | 2.02E-01 | 1                  | 2.02E-01 |
| NR4A1    | 12  | 3                  | 8.94E-01 | 3                  | 8.94E-01 | 4                  | 1.40E-01 | 4                  | 1.40E-01 | 3                  | 1.94E-01 | 3                  | 1.94E-01 |
| ZNRF1    | 16  | 1                  | 5.79E-01 | 1                  | 5.79E-01 | 1                  | 1.59E-01 | 1                  | 1.59E-01 | 1                  | 1.40E-01 | 1                  | 1.40E-01 |
| STAP2    | 19  | 1                  | 5.81E-01 | 1                  | 5.81E-01 | 1                  | 1.62E-01 | 1                  | 1.62E-01 | 1                  | 1.40E-01 | 1                  | 1.40E-01 |
| OR13A1   | 10  | 1                  | 8.62E-01 | 1                  | 8.62E-01 | 1                  | 1.40E-01 | 1                  | 1.40E-01 | 1                  | 1.78E-01 | 1                  | 1.78E-01 |
| ANKRD24  | 19  | 4                  | 4.15E-01 | 5                  | 5.75E-01 | 4                  | 1.40E-01 | 5                  | 1.84E-01 | 4                  | 1.43E-01 | 5                  | 1.87E-01 |
| SFSWAP   | 12  | 2                  | 1.58E-02 | 2                  | 1.58E-02 | 2                  | 1.40E-01 | 2                  | 1.40E-01 | 1                  | 4.53E-01 | 1                  | 4.53E-01 |
| ANO10    | 3   | 5                  | 1.18E-02 | 5                  | 1.18E-02 | 2                  | 2.91E-01 | 2                  | 2.91E-01 | 4                  | 1.40E-01 | 4                  | 1.40E-01 |
| NRG1     | 8   | 4                  | 7.50E-01 | 4                  | 7.50E-01 | 4                  | 3.50E-01 | 4                  | 3.50E-01 | 2                  | 1.40E-01 | 2                  | 1.40E-01 |
| HEBP1    | 12  | 3                  | 7.37E-01 | 3                  | 7.37E-01 | 2                  | 1.40E-01 | 2                  | 1.40E-01 | 2                  | 2.81E-01 | 2                  | 2.81E-01 |
| F2RL1    | 5   | 3                  | 4.61E-01 | 3                  | 4.61E-01 | 2                  | 1.72E-01 | 2                  | 1.72E-01 | 2                  | 1.40E-01 | 2                  | 1.40E-01 |
| DDIT3    | 12  | 1                  | 8.44E-01 | 1                  | 8.44E-01 | 1                  | 1.40E-01 | 1                  | 1.40E-01 | 1                  | 2.53E-01 | 1                  | 2.53E-01 |
| ANXA9    | 1   |                    |          | 1                  | 1.73E-01 |                    |          | 1                  | 3.91E-01 |                    |          | 1                  | 1.41E-01 |
| SEZ6     | 17  | 4                  | 6.74E-02 | 4                  | 6.74E-02 | 4                  | 1.41E-01 | 4                  | 1.41E-01 | 2                  | 3.25E-01 | 2                  | 3.25E-01 |
| UNC13B   | 9   | 13                 | 1.89E-01 | 13                 | 1.89E-01 | 9                  | 1.41E-01 | 9                  | 1.41E-01 | 6                  | 3.88E-01 | 6                  | 3.88E-01 |
| SZT2     | 1   | 10                 | 1.95E-01 | 10                 | 1.95E-01 | 7                  | 1.41E-01 | 7                  | 1.41E-01 | 7                  | 5.17E-01 | 7                  | 5.17E-01 |
| FLNC     | 7   | 10                 | 8.65E-01 | 10                 | 8.65E-01 | 8                  | 3.74E-01 | 8                  | 3.74E-01 | 6                  | 1.41E-01 | 6                  | 1.41E-01 |
| LRRIQ3   | 1   | 3                  | 6.32E-01 | 3                  | 6.32E-01 | 3                  | 1.41E-01 | 3                  | 1.41E-01 | 2                  | 1.48E-01 | 2                  | 1.48E-01 |
| KLHL35   | 11  | 2                  | 1.74E-01 | 2                  | 1.74E-01 | 1                  | 2.56E-01 | 1                  | 2.56E-01 | 2                  | 1.41E-01 | 2                  | 1.41E-01 |
| AXDND1   | 1   | 2                  | 3.33E-01 | 2                  | 3.33E-01 | 2                  | 1.41E-01 | 2                  | 1.41E-01 | 3                  | 2.72E-01 | 3                  | 2.72E-01 |
| CCDC67   | 11  | 1                  | 6.73E-01 | 1                  | 6.73E-01 | 1                  | 1.88E-01 | 1                  | 1.88E-01 | 1                  | 1.41E-01 | 1                  | 1.41E-01 |
| TTL2     | 6   | 3                  | 3.18E-01 | 3                  | 3.18E-01 | 2                  | 3.83E-01 | 2                  | 3.83E-01 | 2                  | 1.42E-01 | 2                  | 1.42E-01 |
| CDH15    | 16  | 4                  | 3.60E-01 | 5                  | 2.62E-01 | 2                  | 1.42E-01 | 3                  | 1.56E-01 | 3                  | 2.54E-01 | 4                  | 4.34E-01 |
| MAS1     | 6   | 4                  | 2.67E-01 | 4                  | 2.67E-01 | 4                  | 5.16E-01 | 4                  | 5.16E-01 | 3                  | 1.42E-01 | 3                  | 1.42E-01 |

| SetID    | Chr | ADEH- vs NA        |          |                    |          | ADEH+ vs ADEH-     |          |                    |          | ADEH+ vs NA        |          |                    |          |
|----------|-----|--------------------|----------|--------------------|----------|--------------------|----------|--------------------|----------|--------------------|----------|--------------------|----------|
|          |     | rarenovel          |          | all                |          | rarenovel          |          | all                |          | rarenovel          |          | all                |          |
|          |     | N variants in test | p-value  | N variants in test | p-value  | N variants in test | p-value  | N variants in test | p-value  | N variants in test | p-value  | N variants in test | p-value  |
| MMACHC   | 1   | 3                  | 7.40E-01 | 3                  | 7.40E-01 | 3                  | 2.61E-01 | 3                  | 2.61E-01 | 1                  | 1.42E-01 | 1                  | 1.42E-01 |
| ZNF430   | 19  | 3                  | 9.87E-02 | 3                  | 9.87E-02 | 3                  | 4.31E-01 | 3                  | 4.31E-01 | 2                  | 1.42E-01 | 2                  | 1.42E-01 |
| NTSR1    | 20  | 6                  | 5.19E-01 | 6                  | 5.19E-01 | 4                  | 1.42E-01 | 4                  | 1.42E-01 | 4                  | 2.31E-01 | 4                  | 2.31E-01 |
| SGSM1    | 22  | 1                  | 5.76E-01 | 1                  | 5.76E-01 | 1                  | 1.42E-01 | 1                  | 1.42E-01 | 1                  | 2.45E-01 | 1                  | 2.45E-01 |
| OR10Z1   | 1   | 1                  | 1.55E-01 | 2                  | 1.55E-01 | 1                  | 3.71E-01 | 2                  | 3.60E-01 |                    |          | 1                  | 1.42E-01 |
| FUCA2    | 6   | 1                  | 7.92E-02 | 2                  | 7.95E-02 |                    |          | 1                  | 1.42E-01 | 1                  | 6.26E-01 | 2                  | 6.29E-01 |
| ACTL8    | 1   | 3                  | 6.96E-01 | 3                  | 6.96E-01 | 2                  | 1.42E-01 | 2                  | 1.42E-01 | 2                  | 3.87E-01 | 2                  | 3.87E-01 |
| TMEM222  | 1   | 3                  | 7.35E-01 | 3                  | 7.35E-01 | 3                  | 1.90E-01 | 3                  | 1.90E-01 | 1                  | 1.42E-01 | 1                  | 1.42E-01 |
| ZNF90    | 19  | 3                  | 5.90E-01 | 4                  | 6.84E-01 | 3                  | 1.42E-01 | 4                  | 1.55E-01 | 2                  | 1.77E-01 | 3                  | 2.09E-01 |
| UBE4B    | 1   | 2                  | 7.33E-01 | 2                  | 7.33E-01 | 1                  | 1.69E-01 | 1                  | 1.69E-01 | 2                  | 1.42E-01 | 2                  | 1.42E-01 |
| TGS1     | 8   | 1                  | 5.20E-01 | 1                  | 5.20E-01 | 1                  | 1.43E-01 | 1                  | 1.43E-01 | 1                  | 1.64E-01 | 1                  | 1.64E-01 |
| ZSWIM2   | 2   | 5                  | 1.60E-01 | 5                  | 1.60E-01 | 3                  | 1.43E-01 | 3                  | 1.43E-01 | 4                  | 5.74E-01 | 4                  | 5.74E-01 |
| PUS3     | 11  | 3                  | 7.64E-02 | 3                  | 7.64E-02 | 3                  | 5.74E-01 | 3                  | 5.74E-01 | 2                  | 1.43E-01 | 2                  | 1.43E-01 |
| SLIT1    | 10  | 3                  | 3.23E-01 | 3                  | 3.23E-01 | 3                  | 1.99E-01 | 3                  | 1.99E-01 | 2                  | 1.43E-01 | 2                  | 1.43E-01 |
| PTDSS2   | 11  | 1                  | 3.31E-01 | 1                  | 3.31E-01 | 1                  | 1.43E-01 | 1                  | 1.43E-01 | 1                  | 1.00E+00 | 1                  | 1.00E+00 |
| UBD      | 6   |                    |          | 1                  | 5.61E-01 |                    |          | 1                  | 2.16E-01 |                    |          | 1                  | 1.43E-01 |
| ZNF394   | 7   | 1                  | 7.98E-01 | 1                  | 7.98E-01 | 1                  | 1.93E-01 | 1                  | 1.93E-01 | 1                  | 1.43E-01 | 1                  | 1.43E-01 |
| FTMT     | 5   | 1                  | 3.08E-01 | 1                  | 3.08E-01 | 1                  | 1.43E-01 | 1                  | 1.43E-01 | 1                  | 2.61E-01 | 1                  | 2.61E-01 |
| NAA38    | 17  | 1                  | 4.17E-01 | 1                  | 4.17E-01 | 1                  | 1.65E-01 | 1                  | 1.65E-01 | 1                  | 1.44E-01 | 1                  | 1.44E-01 |
| PLEKHG7  | 12  | 5                  | 9.64E-02 | 5                  | 9.64E-02 | 3                  | 2.33E-01 | 3                  | 2.33E-01 | 3                  | 1.44E-01 | 3                  | 1.44E-01 |
| MROH9    | 1   | 3                  | 1.12E-01 | 3                  | 1.12E-01 | 3                  | 2.94E-01 | 3                  | 2.94E-01 | 2                  | 1.44E-01 | 2                  | 1.44E-01 |
| SHISA6   | 17  | 2                  | 9.17E-01 | 2                  | 9.17E-01 | 2                  | 1.74E-01 | 2                  | 1.74E-01 | 1                  | 1.44E-01 | 1                  | 1.44E-01 |
| OTOP2    | 17  | 3                  | 1.48E-01 | 3                  | 1.48E-01 | 3                  | 2.33E-01 | 3                  | 2.33E-01 | 2                  | 1.44E-01 | 2                  | 1.44E-01 |
| IFT80    | 3   | 2                  | 9.77E-03 | 2                  | 9.77E-03 | 2                  | 4.63E-01 | 2                  | 4.63E-01 | 1                  | 1.44E-01 | 1                  | 1.44E-01 |
| JAG2     | 14  | 4                  | 3.58E-01 | 4                  | 3.58E-01 | 2                  | 2.31E-01 | 2                  | 2.31E-01 | 3                  | 1.44E-01 | 3                  | 1.44E-01 |
| MPEG1    | 11  | 4                  | 3.97E-01 | 4                  | 3.97E-01 | 4                  | 1.44E-01 | 4                  | 1.44E-01 | 4                  | 3.91E-01 | 4                  | 3.91E-01 |
| OR4L1    | 14  | 1                  | 6.33E-01 | 3                  | 6.35E-01 | 1                  | 1.92E-01 | 3                  | 1.66E-01 | 1                  | 3.54E-01 | 3                  | 1.44E-01 |
| TMEM14B  | 6   | 1                  | 1.26E-01 | 1                  | 1.26E-01 | 1                  | 1.00E+00 | 1                  | 1.00E+00 | 1                  | 1.44E-01 | 1                  | 1.44E-01 |
| SLC12A8  | 3   | 5                  | 1.35E-01 | 5                  | 1.35E-01 | 4                  | 1.44E-01 | 4                  | 1.44E-01 | 2                  | 6.99E-01 | 2                  | 6.99E-01 |
| IDI2     | 10  | 1                  | 3.02E-01 | 2                  | 3.57E-01 | 1                  | 1.00E+00 | 2                  | 3.67E-01 | 1                  | 3.98E-01 | 2                  | 1.45E-01 |
| CCDC82   | 11  | 4                  | 3.14E-01 | 4                  | 3.14E-01 | 3                  | 1.45E-01 | 3                  | 1.45E-01 | 3                  | 3.09E-01 | 3                  | 3.09E-01 |
| DNAJC13  | 3   | 8                  | 1.00E+00 | 8                  | 1.00E+00 | 7                  | 1.45E-01 | 7                  | 1.45E-01 | 6                  | 2.14E-01 | 6                  | 2.14E-01 |
| IL17RD   | 3   | 5                  | 6.78E-01 | 5                  | 6.78E-01 | 4                  | 1.76E-01 | 4                  | 1.76E-01 | 3                  | 1.45E-01 | 3                  | 1.45E-01 |
| ONECUT1  | 15  | 2                  | 8.72E-01 | 2                  | 8.72E-01 | 2                  | 1.45E-01 | 2                  | 1.45E-01 | 2                  | 1.59E-01 | 2                  | 1.59E-01 |
| MIER2    | 19  | 3                  | 6.67E-01 | 3                  | 6.67E-01 | 2                  | 1.45E-01 | 2                  | 1.45E-01 | 3                  | 2.90E-01 | 3                  | 2.90E-01 |
| ARHGEF15 | 17  | 4                  | 4.33E-01 | 4                  | 4.33E-01 | 3                  | 1.45E-01 | 3                  | 1.45E-01 | 4                  | 2.67E-01 | 4                  | 2.67E-01 |
| NDUFV3   | 21  | 3                  | 7.67E-01 | 4                  | 4.53E-01 | 2                  | 2.90E-01 | 3                  | 1.45E-01 | 3                  | 3.04E-01 | 4                  | 2.20E-01 |
| RIN3     | 14  | 3                  | 2.24E-01 | 3                  | 2.24E-01 | 2                  | 1.45E-01 | 2                  | 1.45E-01 | 4                  | 2.92E-01 | 4                  | 2.92E-01 |
| MAN2B2   | 4   | 13                 | 2.12E-01 | 14                 | 1.85E-01 | 11                 | 1.90E-01 | 12                 | 1.45E-01 | 5                  | 3.09E-01 | 6                  | 2.59E-01 |
| YJEFN3   | 19  | 2                  | 9.22E-01 | 2                  | 9.22E-01 | 2                  | 1.45E-01 | 2                  | 1.45E-01 | 2                  | 1.73E-01 | 2                  | 1.73E-01 |
| POMGNT1  | 1   | 3                  | 3.14E-01 | 3                  | 3.14E-01 | 3                  | 1.45E-01 | 3                  | 1.45E-01 | 3                  | 1.86E-01 | 3                  | 1.86E-01 |
| GPR25    | 1   | 1                  | 6.33E-01 | 1                  | 6.33E-01 | 1                  | 1.45E-01 | 1                  | 1.45E-01 | 1                  | 2.30E-01 | 1                  | 2.30E-01 |
| GYS1     | 19  | 4                  | 8.71E-01 | 4                  | 8.71E-01 | 4                  | 2.30E-01 | 4                  | 2.30E-01 | 2                  | 1.46E-01 | 2                  | 1.46E-01 |
| NLRP12   | 19  | 8                  | 9.16E-01 | 8                  | 9.16E-01 | 6                  | 2.25E-01 | 6                  | 2.25E-01 | 6                  | 1.46E-01 | 6                  | 1.46E-01 |
| NDUFV1   | 11  | 4                  | 6.25E-01 | 4                  | 6.25E-01 | 3                  | 3.05E-01 | 3                  | 3.05E-01 | 2                  | 1.46E-01 | 2                  | 1.46E-01 |
| OR5H2    | 3   | 3                  | 1.00E+00 | 3                  | 1.00E+00 | 4                  | 1.83E-01 | 4                  | 1.83E-01 | 2                  | 1.46E-01 | 2                  | 1.46E-01 |
| GNAT3    | 7   | 3                  | 1.00E+00 | 3                  | 1.00E+00 | 3                  | 1.46E-01 | 3                  | 1.46E-01 | 3                  | 1.47E-01 | 3                  | 1.47E-01 |
| CHDH     | 3   | 4                  | 3.50E-01 | 4                  | 3.50E-01 | 2                  | 1.46E-01 | 2                  | 1.46E-01 | 3                  | 2.64E-01 | 3                  | 2.64E-01 |

| SetID     | Chr | ADEH- vs NA        |          |                    |          | ADEH+ vs ADEH-     |          |                    |          | ADEH+ vs NA        |          |                    |          |
|-----------|-----|--------------------|----------|--------------------|----------|--------------------|----------|--------------------|----------|--------------------|----------|--------------------|----------|
|           |     | rarenovel          |          | all                |          | rarenovel          |          | all                |          | rarenovel          |          | all                |          |
|           |     | N variants in test | p-value  | N variants in test | p-value  | N variants in test | p-value  | N variants in test | p-value  | N variants in test | p-value  | N variants in test | p-value  |
| SERPINA10 | 14  | 5                  | 4.27E-01 | 5                  | 4.27E-01 | 4                  | 5.27E-01 | 4                  | 5.27E-01 | 3                  | 1.46E-01 | 3                  | 1.46E-01 |
| SPTBN4    | 19  | 5                  | 6.29E-01 | 5                  | 6.29E-01 | 5                  | 3.20E-01 | 5                  | 3.20E-01 | 2                  | 1.46E-01 | 2                  | 1.46E-01 |
| ABHD14B   | 3   | 3                  | 5.89E-01 | 3                  | 5.89E-01 | 3                  | 1.47E-01 | 3                  | 1.47E-01 | 2                  | 1.63E-01 | 2                  | 1.63E-01 |
| CCDC158   | 4   | 7                  | 1.00E+00 | 7                  | 1.00E+00 | 6                  | 1.47E-01 | 6                  | 1.47E-01 | 4                  | 2.09E-01 | 4                  | 2.09E-01 |
| RNF103    | 2   | 2                  | 5.65E-01 | 2                  | 5.65E-01 | 2                  | 1.95E-01 | 2                  | 1.95E-01 | 2                  | 1.47E-01 | 2                  | 1.47E-01 |
| RNF25     | 2   | 1                  | 7.47E-01 | 1                  | 7.47E-01 | 1                  | 2.03E-01 | 1                  | 2.03E-01 | 1                  | 1.47E-01 | 1                  | 1.47E-01 |
| SPINT3    | 20  | 1                  | 7.70E-01 | 1                  | 7.70E-01 | 1                  | 1.47E-01 | 1                  | 1.47E-01 | 1                  | 2.01E-01 | 1                  | 2.01E-01 |
| AGRN      | 1   | 11                 | 4.03E-01 | 11                 | 4.03E-01 | 8                  | 1.63E-01 | 8                  | 1.63E-01 | 7                  | 1.47E-01 | 7                  | 1.47E-01 |
| ZNF268    | 12  | 5                  | 8.37E-01 | 5                  | 8.37E-01 | 4                  | 1.72E-01 | 4                  | 1.72E-01 | 3                  | 1.47E-01 | 3                  | 1.47E-01 |
| MRPL16    | 11  | 2                  | 5.65E-01 | 2                  | 5.65E-01 | 2                  | 4.12E-01 | 2                  | 4.12E-01 | 1                  | 1.48E-01 | 1                  | 1.48E-01 |
| CLEC16A   | 16  | 4                  | 6.75E-01 | 4                  | 6.75E-01 | 2                  | 1.48E-01 | 2                  | 1.48E-01 | 3                  | 2.56E-01 | 3                  | 2.56E-01 |
| REXO1     | 19  | 5                  | 3.78E-01 | 5                  | 3.78E-01 | 5                  | 6.91E-01 | 5                  | 6.91E-01 | 2                  | 1.48E-01 | 2                  | 1.48E-01 |
| EBNA1BP2  | 1   | 2                  | 8.78E-02 | 2                  | 8.78E-02 | 2                  | 1.48E-01 | 2                  | 1.48E-01 | 2                  | 1.00E+00 | 2                  | 1.00E+00 |
| PAK1IP1   | 6   | 1                  | 9.78E-02 | 1                  | 9.78E-02 | 1                  | 1.00E+00 | 1                  | 1.00E+00 | 1                  | 1.48E-01 | 1                  | 1.48E-01 |
| CCDC65    | 12  | 2                  | 3.41E-01 | 4                  | 8.10E-01 | 1                  | 5.05E-01 | 3                  | 1.48E-01 | 1                  | 6.09E-01 | 3                  | 1.78E-01 |
| LKAAEAR1  | 20  |                    |          | 1                  | 1.01E-01 |                    |          | 1                  | 1.48E-01 |                    |          | 1                  | 5.88E-01 |
| APOBEC1   | 12  | 3                  | 1.76E-01 | 3                  | 1.76E-01 | 2                  | 1.48E-01 | 2                  | 1.48E-01 | 3                  | 5.08E-01 | 3                  | 5.08E-01 |
| HOOK2     | 19  | 1                  | 4.54E-01 | 1                  | 4.54E-01 | 1                  | 1.48E-01 | 1                  | 1.48E-01 | 1                  | 2.38E-01 | 1                  | 2.38E-01 |
| COL14A1   | 8   | 9                  | 4.48E-01 | 9                  | 4.48E-01 | 8                  | 2.44E-01 | 8                  | 2.44E-01 | 4                  | 1.49E-01 | 4                  | 1.49E-01 |
| HMCN1     | 1   | 25                 | 6.00E-01 | 26                 | 6.00E-01 | 19                 | 1.49E-01 | 20                 | 1.49E-01 | 8                  | 2.49E-01 | 9                  | 2.49E-01 |
| CCDC33    | 15  |                    |          | 1                  | 6.76E-01 |                    |          | 1                  | 1.87E-01 |                    |          | 1                  | 1.49E-01 |
| MAP2      | 2   | 5                  | 5.98E-01 | 5                  | 5.98E-01 | 5                  | 1.90E-01 | 5                  | 1.90E-01 | 3                  | 1.49E-01 | 3                  | 1.49E-01 |
| TSSK4     | 14  | 3                  | 9.23E-01 | 3                  | 9.23E-01 | 3                  | 2.61E-01 | 3                  | 2.61E-01 | 2                  | 1.49E-01 | 2                  | 1.49E-01 |
| BTBD17    | 17  | 2                  | 5.67E-01 | 3                  | 5.03E-01 | 2                  | 6.49E-01 | 3                  | 5.37E-01 |                    |          | 1                  | 1.49E-01 |
| FSD1L     | 9   | 1                  | 1.06E-01 | 1                  | 1.06E-01 | 1                  | 1.49E-01 | 1                  | 1.49E-01 | 1                  | 4.47E-01 | 1                  | 4.47E-01 |
| FCHO1     | 19  | 3                  | 5.27E-01 | 3                  | 5.27E-01 | 3                  | 1.49E-01 | 3                  | 1.49E-01 | 3                  | 2.60E-01 | 3                  | 2.60E-01 |
| ZNF107    | 7   | 3                  | 1.48E-01 | 3                  | 1.48E-01 | 3                  | 1.00E+00 | 3                  | 1.00E+00 | 1                  | 1.50E-01 | 1                  | 1.50E-01 |
| ETV2      | 19  |                    |          | 1                  | 1.00E+00 |                    |          | 1                  | 1.50E-01 |                    |          | 1                  | 2.17E-01 |
| GPR137B   | 1   | 1                  | 8.86E-01 | 1                  | 8.86E-01 | 1                  | 1.50E-01 | 1                  | 1.50E-01 | 1                  | 1.95E-01 | 1                  | 1.95E-01 |
| KIF26A    | 14  | 15                 | 1.00E+00 | 15                 | 1.00E+00 | 12                 | 3.03E-01 | 12                 | 3.03E-01 | 10                 | 1.50E-01 | 10                 | 1.50E-01 |
| ZC3H12D   | 6   | 1                  | 8.28E-02 | 1                  | 8.28E-02 | 1                  | 1.50E-01 | 1                  | 1.50E-01 | 1                  | 5.46E-01 | 1                  | 5.46E-01 |
| APOBEC4   | 1   | 1                  | 1.16E-01 | 1                  | 1.16E-01 | 1                  | 1.50E-01 | 1                  | 1.50E-01 | 1                  | 7.04E-01 | 1                  | 7.04E-01 |
| CHERP     | 19  | 2                  | 6.81E-02 | 2                  | 6.81E-02 | 2                  | 1.50E-01 | 2                  | 1.50E-01 | 1                  | 1.00E+00 | 1                  | 1.00E+00 |
| LIPJ      | 10  | 2                  | 7.41E-01 | 2                  | 7.41E-01 | 1                  | 1.50E-01 | 1                  | 1.50E-01 | 2                  | 3.79E-01 | 2                  | 3.79E-01 |
| AFF1      | 4   | 2                  | 3.28E-01 | 2                  | 3.28E-01 | 2                  | 1.50E-01 | 2                  | 1.50E-01 | 1                  | 3.40E-01 | 1                  | 3.40E-01 |
| CAPN11    | 6   | 2                  | 7.60E-01 | 2                  | 7.60E-01 | 2                  | 3.08E-01 | 2                  | 3.08E-01 | 1                  | 1.51E-01 | 1                  | 1.51E-01 |
| PLIN4     | 19  | 5                  | 7.19E-01 | 5                  | 7.19E-01 | 4                  | 2.31E-01 | 4                  | 2.31E-01 | 1                  | 1.51E-01 | 1                  | 1.51E-01 |
| FAM162B   | 6   | 1                  | 3.73E-01 | 1                  | 3.73E-01 | 1                  | 3.03E-01 | 1                  | 3.03E-01 | 1                  | 1.51E-01 | 1                  | 1.51E-01 |
| SPG11     | 15  | 8                  | 2.63E-01 | 8                  | 2.63E-01 | 8                  | 1.51E-01 | 8                  | 1.51E-01 | 6                  | 1.77E-01 | 6                  | 1.77E-01 |
| PIF1      | 15  | 5                  | 2.91E-01 | 5                  | 2.91E-01 | 4                  | 4.26E-01 | 4                  | 4.26E-01 | 4                  | 1.51E-01 | 4                  | 1.51E-01 |
| TRIM26    | 6   | 2                  | 1.00E+00 | 2                  | 1.00E+00 | 2                  | 1.69E-01 | 2                  | 1.69E-01 | 1                  | 1.51E-01 | 1                  | 1.51E-01 |
| DMBT1     | 10  | 15                 | 1.07E-01 | 15                 | 1.07E-01 | 11                 | 3.05E-01 | 11                 | 3.05E-01 | 8                  | 1.51E-01 | 8                  | 1.51E-01 |
| DOCK5     | 8   | 7                  | 1.80E-02 | 7                  | 1.80E-02 | 6                  | 4.61E-01 | 6                  | 4.61E-01 | 3                  | 1.51E-01 | 3                  | 1.51E-01 |
| TAS2R39   | 7   | 2                  | 7.51E-01 | 2                  | 7.51E-01 | 3                  | 1.63E-01 | 3                  | 1.63E-01 | 2                  | 1.51E-01 | 2                  | 1.51E-01 |
| PGAM2     | 7   | 1                  | 7.86E-01 | 1                  | 7.86E-01 | 1                  | 1.51E-01 | 1                  | 1.51E-01 | 1                  | 1.95E-01 | 1                  | 1.95E-01 |
| PROSER2   | 10  | 8                  | 8.03E-02 | 9                  | 8.32E-02 | 6                  | 2.05E-01 | 7                  | 1.51E-01 | 6                  | 3.83E-01 | 7                  | 3.40E-01 |
| C2orf57   | 2   | 2                  | 6.02E-01 | 2                  | 6.02E-01 | 2                  | 3.78E-01 | 2                  | 3.78E-01 | 1                  | 1.52E-01 | 1                  | 1.52E-01 |
| DCSTAMP   | 8   | 1                  | 9.04E-01 | 1                  | 9.04E-01 | 2                  | 1.52E-01 | 2                  | 1.52E-01 | 2                  | 2.08E-01 | 2                  | 2.08E-01 |

| SetID        | Chr | ADEH- vs NA        |          |                    |          | ADEH+ vs ADEH-     |          |                    |          | ADEH+ vs NA        |          |                    |          |
|--------------|-----|--------------------|----------|--------------------|----------|--------------------|----------|--------------------|----------|--------------------|----------|--------------------|----------|
|              |     | rarenovel          |          | all                |          | rarenovel          |          | all                |          | rarenovel          |          | all                |          |
|              |     | N variants in test | p-value  | N variants in test | p-value  | N variants in test | p-value  | N variants in test | p-value  | N variants in test | p-value  | N variants in test | p-value  |
| FTO          | 16  | 3                  | 6.89E-01 | 3                  | 6.89E-01 | 3                  | 1.52E-01 | 3                  | 1.52E-01 | 1                  | 2.11E-01 | 1                  | 2.11E-01 |
| OCA2         | 15  | 7                  | 3.11E-01 | 7                  | 3.11E-01 | 6                  | 2.31E-01 | 6                  | 2.31E-01 | 4                  | 1.52E-01 | 4                  | 1.52E-01 |
| CIB4         | 2   | 1                  | 1.00E+00 | 1                  | 1.00E+00 | 1                  | 1.52E-01 | 1                  | 1.52E-01 | 1                  | 1.55E-01 | 1                  | 1.55E-01 |
| UGGT2        | 13  | 9                  | 2.36E-02 | 9                  | 2.36E-02 | 10                 | 1.52E-01 | 10                 | 1.52E-01 | 5                  | 6.90E-01 | 5                  | 6.90E-01 |
| OR5AP2       | 11  | 1                  | 2.35E-01 | 1                  | 2.35E-01 | 1                  | 1.52E-01 | 1                  | 1.52E-01 | 1                  | 1.00E+00 | 1                  | 1.00E+00 |
| GPR17        | 2   | 4                  | 6.99E-01 | 4                  | 6.99E-01 | 4                  | 1.52E-01 | 4                  | 1.52E-01 | 3                  | 2.45E-01 | 3                  | 2.45E-01 |
| CECR2        | 22  | 4                  | 3.44E-02 | 6                  | 3.89E-02 | 4                  | 3.13E-01 | 6                  | 2.21E-01 | 2                  | 1.52E-01 | 4                  | 1.52E-01 |
| PGLS         | 19  | 4                  | 1.65E-01 | 4                  | 1.65E-01 | 4                  | 7.14E-01 | 4                  | 7.14E-01 | 1                  | 1.52E-01 | 1                  | 1.52E-01 |
| RNF125       | 18  | 2                  | 5.70E-01 | 2                  | 5.70E-01 | 2                  | 1.00E+00 | 2                  | 1.00E+00 | 1                  | 1.53E-01 | 1                  | 1.53E-01 |
| ZNF428       | 19  | 1                  | 7.06E-01 | 1                  | 7.06E-01 | 1                  | 1.53E-01 | 1                  | 1.53E-01 | 1                  | 1.79E-01 | 1                  | 1.79E-01 |
| EYS          | 6   | 5                  | 5.30E-02 | 5                  | 5.30E-02 | 3                  | 1.53E-01 | 3                  | 1.53E-01 | 5                  | 3.38E-01 | 5                  | 3.38E-01 |
| ABHD5        | 3   | 1                  | 1.58E-01 | 1                  | 1.58E-01 | 1                  | 1.00E+00 | 1                  | 1.00E+00 | 1                  | 1.53E-01 | 1                  | 1.53E-01 |
| TNFRSF13B    | 17  | 3                  | 7.04E-01 | 3                  | 7.04E-01 | 3                  | 2.12E-01 | 3                  | 2.12E-01 | 2                  | 1.54E-01 | 2                  | 1.54E-01 |
| SEMG2        | 20  | 7                  | 4.42E-01 | 7                  | 4.42E-01 | 5                  | 2.59E-01 | 5                  | 2.59E-01 | 4                  | 1.54E-01 | 4                  | 1.54E-01 |
| THUMPD3      | 3   | 4                  | 4.95E-01 | 4                  | 4.95E-01 | 5                  | 3.40E-01 | 5                  | 3.40E-01 | 2                  | 1.54E-01 | 2                  | 1.54E-01 |
| SLC26A8      | 6   | 3                  | 1.00E+00 | 3                  | 1.00E+00 | 4                  | 2.00E-01 | 4                  | 2.00E-01 | 2                  | 1.54E-01 | 2                  | 1.54E-01 |
| NUDT8        | 11  | 2                  | 9.15E-01 | 2                  | 9.15E-01 | 2                  | 1.54E-01 | 2                  | 1.54E-01 | 1                  | 2.13E-01 | 1                  | 2.13E-01 |
| NTRK1        | 1   | 4                  | 1.35E-01 | 4                  | 1.35E-01 | 4                  | 3.21E-01 | 4                  | 3.21E-01 | 2                  | 1.54E-01 | 2                  | 1.54E-01 |
| CASC4        | 15  | 2                  | 8.71E-01 | 2                  | 8.71E-01 | 3                  | 1.54E-01 | 3                  | 1.54E-01 | 3                  | 3.38E-01 | 3                  | 3.38E-01 |
| EVC2         | 4   | 11                 | 1.49E-01 | 11                 | 1.49E-01 | 11                 | 6.60E-01 | 11                 | 6.60E-01 | 4                  | 1.55E-01 | 4                  | 1.55E-01 |
| BOLA1        | 1   | 2                  | 7.46E-01 | 2                  | 7.46E-01 | 2                  | 1.65E-01 | 2                  | 1.65E-01 | 2                  | 1.55E-01 | 2                  | 1.55E-01 |
| ANKHD1       | 5   | 1                  | 7.61E-01 | 1                  | 7.61E-01 | 1                  | 1.70E-01 | 1                  | 1.70E-01 | 1                  | 1.55E-01 | 1                  | 1.55E-01 |
| ANKHD1-EIF4E | 5   | 1                  | 7.61E-01 | 1                  | 7.61E-01 | 1                  | 1.70E-01 | 1                  | 1.70E-01 | 1                  | 1.55E-01 | 1                  | 1.55E-01 |
| TAS1R3       | 1   | 9                  | 1.16E-01 | 9                  | 1.16E-01 | 10                 | 6.52E-01 | 10                 | 6.52E-01 | 2                  | 1.55E-01 | 2                  | 1.55E-01 |
| MRPS18B      | 6   | 3                  | 9.76E-02 | 3                  | 9.76E-02 | 2                  | 1.55E-01 | 2                  | 1.55E-01 | 2                  | 1.00E+00 | 2                  | 1.00E+00 |
| VAV2         | 9   | 2                  | 2.01E-01 | 2                  | 2.01E-01 | 1                  | 1.82E-01 | 1                  | 1.82E-01 | 2                  | 1.55E-01 | 2                  | 1.55E-01 |
| FKTN         | 9   | 2                  | 2.15E-01 | 2                  | 2.15E-01 | 2                  | 1.55E-01 | 2                  | 1.55E-01 | 1                  | 3.24E-01 | 1                  | 3.24E-01 |
| TSPAN16      | 19  | 2                  | 1.57E-01 | 2                  | 1.57E-01 | 2                  | 1.00E+00 | 2                  | 1.00E+00 | 1                  | 1.55E-01 | 1                  | 1.55E-01 |
| HK3          | 5   | 13                 | 5.00E-01 | 13                 | 5.00E-01 | 11                 | 1.55E-01 | 11                 | 1.55E-01 | 7                  | 1.58E-01 | 7                  | 1.58E-01 |
| ATG3         | 3   | 1                  | 7.60E-01 | 1                  | 7.60E-01 | 1                  | 1.56E-01 | 1                  | 1.56E-01 | 1                  | 3.40E-01 | 1                  | 3.40E-01 |
| CAD          | 2   | 3                  | 1.92E-03 | 3                  | 1.92E-03 | 3                  | 4.30E-01 | 3                  | 4.30E-01 | 1                  | 1.56E-01 | 1                  | 1.56E-01 |
| AFAP1L2      | 10  | 4                  | 2.11E-01 | 4                  | 2.11E-01 | 4                  | 1.56E-01 | 4                  | 1.56E-01 | 3                  | 2.26E-01 | 3                  | 2.26E-01 |
| MYH7B        | 20  | 17                 | 2.16E-01 | 18                 | 2.16E-01 | 15                 | 1.56E-01 | 16                 | 1.56E-01 | 13                 | 1.73E-01 | 14                 | 1.73E-01 |
| ABCA8        | 17  | 8                  | 8.75E-01 | 8                  | 8.75E-01 | 8                  | 1.56E-01 | 8                  | 1.56E-01 | 5                  | 3.32E-01 | 5                  | 3.32E-01 |
| DOCK2        | 5   | 2                  | 3.15E-01 | 2                  | 3.15E-01 | 3                  | 1.56E-01 | 3                  | 1.56E-01 | 2                  | 2.10E-01 | 2                  | 2.10E-01 |
| PACRGL       | 4   | 2                  | 8.18E-01 | 2                  | 8.18E-01 | 2                  | 1.56E-01 | 2                  | 1.56E-01 | 2                  | 2.67E-01 | 2                  | 2.67E-01 |
| GORASP1      | 3   | 4                  | 1.95E-01 | 4                  | 1.95E-01 | 3                  | 1.56E-01 | 3                  | 1.56E-01 | 4                  | 6.04E-01 | 4                  | 6.04E-01 |
| ENTPD3       | 3   | 3                  | 6.46E-01 | 3                  | 6.46E-01 | 3                  | 1.57E-01 | 3                  | 1.57E-01 | 2                  | 1.59E-01 | 2                  | 1.59E-01 |
| NPHP4        | 1   | 18                 | 9.09E-01 | 18                 | 9.09E-01 | 13                 | 1.57E-01 | 13                 | 1.57E-01 | 10                 | 1.76E-01 | 10                 | 1.76E-01 |
| CLDN20       | 6   | 2                  | 7.81E-01 | 2                  | 7.81E-01 | 2                  | 1.66E-01 | 2                  | 1.66E-01 | 2                  | 1.57E-01 | 2                  | 1.57E-01 |
| AGR3         | 7   | 1                  | 5.70E-01 | 1                  | 5.70E-01 | 1                  | 2.05E-01 | 1                  | 2.05E-01 | 1                  | 1.57E-01 | 1                  | 1.57E-01 |
| KAZALD1      | 10  | 3                  | 4.43E-01 | 3                  | 4.43E-01 | 3                  | 1.57E-01 | 3                  | 1.57E-01 | 1                  | 3.60E-01 | 1                  | 3.60E-01 |
| PLXNB1       | 3   | 5                  | 2.55E-01 | 5                  | 2.55E-01 | 8                  | 3.99E-01 | 8                  | 3.99E-01 | 4                  | 1.57E-01 | 4                  | 1.57E-01 |
| ANKZF1       | 2   | 2                  | 8.54E-01 | 2                  | 8.54E-01 | 3                  | 1.57E-01 | 3                  | 1.57E-01 | 3                  | 2.15E-01 | 3                  | 2.15E-01 |
| RFX6         | 6   | 2                  | 2.61E-01 | 2                  | 2.61E-01 | 3                  | 1.88E-01 | 3                  | 1.88E-01 | 2                  | 1.57E-01 | 2                  | 1.57E-01 |
| LECT2        | 5   | 1                  | 6.20E-01 | 1                  | 6.20E-01 | 1                  | 1.58E-01 | 1                  | 1.58E-01 | 1                  | 1.63E-01 | 1                  | 1.63E-01 |
| BPI          | 20  | 7                  | 5.67E-01 | 7                  | 5.67E-01 | 4                  | 1.84E-01 | 4                  | 1.84E-01 | 4                  | 1.58E-01 | 4                  | 1.58E-01 |
| FSTL4        | 5   | 4                  | 6.80E-02 | 5                  | 5.06E-02 | 3                  | 6.71E-01 | 4                  | 8.66E-01 | 1                  | 4.45E-01 | 2                  | 1.58E-01 |

| SetID    | Chr | ADEH- vs NA        |          |                    |          | ADEH+ vs ADEH-     |          |                    |          | ADEH+ vs NA        |          |                    |          |
|----------|-----|--------------------|----------|--------------------|----------|--------------------|----------|--------------------|----------|--------------------|----------|--------------------|----------|
|          |     | rarenovel          |          | all                |          | rarenovel          |          | all                |          | rarenovel          |          | all                |          |
|          |     | N variants in test | p-value  | N variants in test | p-value  | N variants in test | p-value  | N variants in test | p-value  | N variants in test | p-value  | N variants in test | p-value  |
| PCDHGA10 | 5   | 2                  | 5.46E-01 | 2                  | 5.46E-01 | 2                  | 1.89E-01 | 2                  | 1.89E-01 | 2                  | 1.58E-01 | 2                  | 1.58E-01 |
| KANK3    | 19  | 3                  | 8.25E-02 | 3                  | 8.25E-02 | 3                  | 1.58E-01 | 3                  | 1.58E-01 | 2                  | 2.25E-01 | 2                  | 2.25E-01 |
| CDK7     | 5   | 3                  | 3.30E-01 | 3                  | 3.30E-01 | 2                  | 1.58E-01 | 2                  | 1.58E-01 | 2                  | 7.01E-01 | 2                  | 7.01E-01 |
| KDM6B    | 17  | 5                  | 5.66E-01 | 5                  | 5.66E-01 | 4                  | 1.58E-01 | 4                  | 1.58E-01 | 3                  | 2.23E-01 | 3                  | 2.23E-01 |
| EGFLAM   | 5   | 3                  | 8.52E-01 | 4                  | 6.88E-01 | 2                  | 4.19E-01 | 3                  | 3.74E-01 | 3                  | 3.57E-01 | 4                  | 1.58E-01 |
| HYKK     | 15  | 2                  | 2.25E-01 | 2                  | 2.25E-01 | 2                  | 1.58E-01 | 2                  | 1.58E-01 | 1                  | 1.74E-01 | 1                  | 1.74E-01 |
| AMZ1     | 7   | 8                  | 6.61E-01 | 8                  | 6.61E-01 | 7                  | 1.87E-01 | 7                  | 1.87E-01 | 4                  | 1.58E-01 | 4                  | 1.58E-01 |
| BRIP1    | 17  | 6                  | 7.76E-01 | 6                  | 7.76E-01 | 6                  | 1.90E-01 | 6                  | 1.90E-01 | 2                  | 1.58E-01 | 2                  | 1.58E-01 |
| ZMYND10  | 3   | 2                  | 1.00E+00 | 2                  | 1.00E+00 | 2                  | 1.84E-01 | 2                  | 1.84E-01 | 2                  | 1.59E-01 | 2                  | 1.59E-01 |
| OASL     | 12  | 2                  | 9.67E-02 | 2                  | 9.67E-02 | 3                  | 1.59E-01 | 3                  | 1.59E-01 | 2                  | 1.64E-01 | 2                  | 1.64E-01 |
| TTC31    | 2   | 2                  | 1.00E+00 | 2                  | 1.00E+00 | 2                  | 2.61E-01 | 2                  | 2.61E-01 | 1                  | 1.59E-01 | 1                  | 1.59E-01 |
| PNLIPRP3 | 10  | 3                  | 4.66E-02 | 3                  | 4.66E-02 | 4                  | 1.59E-01 | 4                  | 1.59E-01 | 2                  | 2.22E-01 | 2                  | 2.22E-01 |
| ETV4     | 17  | 6                  | 5.10E-01 | 6                  | 5.10E-01 | 3                  | 1.82E-01 | 3                  | 1.82E-01 | 4                  | 1.59E-01 | 4                  | 1.59E-01 |
| DOCK6    | 19  | 13                 | 1.00E+00 | 15                 | 4.60E-01 | 11                 | 3.07E-01 | 13                 | 1.59E-01 | 5                  | 3.11E-01 | 7                  | 3.30E-01 |
| FITM2    | 20  | 3                  | 7.37E-01 | 3                  | 7.37E-01 | 3                  | 1.60E-01 | 3                  | 1.60E-01 | 2                  | 1.59E-01 | 2                  | 1.59E-01 |
| GGT7     | 20  | 3                  | 4.88E-01 | 3                  | 4.88E-01 | 3                  | 1.59E-01 | 3                  | 1.59E-01 | 3                  | 2.62E-01 | 3                  | 2.62E-01 |
| ZNF778   | 16  | 3                  | 7.67E-01 | 3                  | 7.67E-01 | 2                  | 1.66E-01 | 2                  | 1.66E-01 | 3                  | 1.60E-01 | 3                  | 1.60E-01 |
| ZNF57    | 19  | 3                  | 3.07E-02 | 3                  | 3.07E-02 | 3                  | 1.60E-01 | 3                  | 1.60E-01 | 1                  | 1.00E+00 | 1                  | 1.00E+00 |
| UNC45A   | 15  | 5                  | 3.84E-02 | 5                  | 3.84E-02 | 5                  | 5.01E-01 | 5                  | 5.01E-01 | 1                  | 1.60E-01 | 1                  | 1.60E-01 |
| MAPK13   | 6   | 4                  | 7.38E-02 | 4                  | 7.38E-02 | 3                  | 1.60E-01 | 3                  | 1.60E-01 | 3                  | 4.59E-01 | 3                  | 4.59E-01 |
| SGK1     | 6   | 1                  | 2.94E-02 | 1                  | 2.94E-02 | 1                  | 5.00E-01 | 1                  | 5.00E-01 | 1                  | 1.60E-01 | 1                  | 1.60E-01 |
| PLPPR4   | 1   | 2                  | 8.33E-03 | 2                  | 8.33E-03 | 1                  | 2.57E-01 | 1                  | 2.57E-01 | 2                  | 1.61E-01 | 2                  | 1.61E-01 |
| FBXO36   | 2   | 3                  | 8.28E-02 | 4                  | 8.28E-02 | 3                  | 5.36E-01 | 4                  | 5.36E-01 | 2                  | 1.61E-01 | 3                  | 1.61E-01 |
| PCDHGA6  | 5   | 4                  | 3.46E-01 | 4                  | 3.46E-01 | 3                  | 1.61E-01 | 3                  | 1.61E-01 | 3                  | 2.58E-01 | 3                  | 2.58E-01 |
| ATP2C2   | 16  | 10                 | 4.63E-01 | 10                 | 4.63E-01 | 8                  | 2.04E-01 | 8                  | 2.04E-01 | 5                  | 1.61E-01 | 5                  | 1.61E-01 |
| SPAG1    | 8   | 2                  | 3.75E-01 | 2                  | 3.75E-01 | 2                  | 6.00E-01 | 2                  | 6.00E-01 | 1                  | 1.61E-01 | 1                  | 1.61E-01 |
| SGSM2    | 17  | 4                  | 6.09E-01 | 4                  | 6.09E-01 | 4                  | 4.28E-01 | 4                  | 4.28E-01 | 2                  | 1.61E-01 | 2                  | 1.61E-01 |
| SYNGR3   | 16  | 1                  | 3.02E-01 | 1                  | 3.02E-01 | 1                  | 1.00E+00 | 1                  | 1.00E+00 | 1                  | 1.61E-01 | 1                  | 1.61E-01 |
| MYO18B   | 22  | 14                 | 2.27E-01 | 17                 | 5.84E-01 | 14                 | 5.38E-01 | 17                 | 6.42E-01 | 6                  | 1.69E-01 | 9                  | 1.62E-01 |
| GCAT     | 22  | 6                  | 5.50E-01 | 6                  | 5.50E-01 | 5                  | 1.62E-01 | 5                  | 1.62E-01 | 3                  | 1.87E-01 | 3                  | 1.87E-01 |
| AIRE     | 21  | 5                  | 4.94E-01 | 5                  | 4.94E-01 | 5                  | 1.69E-01 | 5                  | 1.69E-01 | 2                  | 1.62E-01 | 2                  | 1.62E-01 |
| TRIM5    | 11  | 5                  | 2.32E-02 | 5                  | 2.32E-02 | 3                  | 1.62E-01 | 3                  | 1.62E-01 | 3                  | 1.00E+00 | 3                  | 1.00E+00 |
| OR10G3   | 14  | 1                  | 7.43E-01 | 2                  | 3.84E-01 | 1                  | 5.60E-01 | 2                  | 1.62E-01 |                    |          | 1                  | 1.67E-01 |
| CHRNA10  | 11  | 4                  | 2.52E-01 | 4                  | 2.52E-01 | 3                  | 3.41E-01 | 3                  | 3.41E-01 | 2                  | 1.62E-01 | 2                  | 1.62E-01 |
| NPAP1    | 15  | 6                  | 1.96E-01 | 7                  | 3.60E-01 | 6                  | 1.95E-01 | 7                  | 2.20E-01 | 2                  | 1.63E-01 | 3                  | 1.88E-01 |
| HLA-DOB  | 6   | 3                  | 5.25E-01 | 3                  | 5.25E-01 | 3                  | 1.63E-01 | 3                  | 1.63E-01 | 1                  | 2.09E-01 | 1                  | 2.09E-01 |
| QRICH2   | 17  | 8                  | 4.77E-01 | 8                  | 4.77E-01 | 7                  | 2.16E-01 | 7                  | 2.16E-01 | 4                  | 1.63E-01 | 4                  | 1.63E-01 |
| SLC35F5  | 2   | 1                  | 4.21E-01 | 1                  | 4.21E-01 | 1                  | 3.36E-01 | 1                  | 3.36E-01 | 1                  | 1.63E-01 | 1                  | 1.63E-01 |
| OR13F1   | 9   | 3                  | 1.00E+00 | 4                  | 1.00E+00 | 3                  | 1.63E-01 | 4                  | 1.63E-01 | 2                  | 2.34E-01 | 3                  | 2.34E-01 |
| ZNF816   | 19  | 5                  | 1.00E+00 | 5                  | 1.00E+00 | 4                  | 1.64E-01 | 4                  | 1.64E-01 | 3                  | 1.80E-01 | 3                  | 1.80E-01 |
| FAM71F1  | 7   | 1                  | 8.44E-02 | 2                  | 8.50E-02 |                    |          | 1                  | 1.64E-01 | 1                  | 6.55E-01 | 2                  | 6.64E-01 |
| C19orf18 | 19  | 1                  | 2.18E-01 | 1                  | 2.18E-01 | 1                  | 3.39E-01 | 1                  | 3.39E-01 | 1                  | 1.64E-01 | 1                  | 1.64E-01 |
| MUC6     | 11  | 18                 | 2.11E-01 | 19                 | 1.68E-01 | 14                 | 3.61E-01 | 15                 | 3.68E-01 | 10                 | 1.80E-01 | 11                 | 1.64E-01 |
| CDC25C   | 5   | 3                  | 3.48E-01 | 3                  | 3.48E-01 | 3                  | 1.64E-01 | 3                  | 1.64E-01 | 3                  | 3.03E-01 | 3                  | 3.03E-01 |
| SPATA2   | 20  | 4                  | 5.90E-01 | 4                  | 5.90E-01 | 4                  | 4.48E-01 | 4                  | 4.48E-01 | 2                  | 1.64E-01 | 2                  | 1.64E-01 |
| SYTL2    | 11  | 8                  | 1.68E-01 | 8                  | 1.68E-01 | 7                  | 8.18E-01 | 7                  | 8.18E-01 | 5                  | 1.64E-01 | 5                  | 1.64E-01 |
| DMP1     | 4   |                    |          | 1                  | 7.98E-01 |                    |          | 1                  | 1.65E-01 |                    |          | 1                  | 1.64E-01 |
| TMEM8A   | 16  | 3                  | 6.86E-01 | 3                  | 6.86E-01 | 4                  | 2.89E-01 | 4                  | 2.89E-01 | 2                  | 1.64E-01 | 2                  | 1.64E-01 |

| SetID    | Chr | ADEH- vs NA        |          |                    |          | ADEH+ vs ADEH-     |          |                    |          | ADEH+ vs NA        |          |                    |          |
|----------|-----|--------------------|----------|--------------------|----------|--------------------|----------|--------------------|----------|--------------------|----------|--------------------|----------|
|          |     | rarenovel          |          | all                |          | rarenovel          |          | all                |          | rarenovel          |          | all                |          |
|          |     | N variants in test | p-value  | N variants in test | p-value  | N variants in test | p-value  | N variants in test | p-value  | N variants in test | p-value  | N variants in test | p-value  |
| PLD1     | 3   | 4                  | 2.14E-02 | 4                  | 2.14E-02 | 3                  | 2.67E-01 | 3                  | 2.67E-01 | 2                  | 1.64E-01 | 2                  | 1.64E-01 |
| SLC25A41 | 19  | 3                  | 5.14E-01 | 4                  | 6.27E-01 | 3                  | 2.55E-01 | 4                  | 2.75E-01 | 2                  | 1.64E-01 | 3                  | 2.03E-01 |
| GAREM2   | 2   | 3                  | 1.00E+00 | 3                  | 1.00E+00 | 2                  | 1.70E-01 | 2                  | 1.70E-01 | 2                  | 1.65E-01 | 2                  | 1.65E-01 |
| BHMT     | 5   | 2                  | 2.65E-01 | 2                  | 2.65E-01 | 2                  | 1.00E+00 | 2                  | 1.00E+00 | 1                  | 1.65E-01 | 1                  | 1.65E-01 |
| CMYA5    | 5   | 11                 | 1.45E-01 | 15                 | 1.47E-01 | 9                  | 1.65E-01 | 13                 | 1.70E-01 | 8                  | 2.50E-01 | 12                 | 2.92E-01 |
| TPCN2    | 11  | 2                  | 6.60E-01 | 3                  | 7.86E-01 | 3                  | 1.65E-01 | 4                  | 1.71E-01 | 2                  | 1.84E-01 | 3                  | 1.90E-01 |
| LIMK2    | 22  | 7                  | 2.96E-01 | 7                  | 2.96E-01 | 7                  | 4.89E-01 | 7                  | 4.89E-01 | 4                  | 1.65E-01 | 4                  | 1.65E-01 |
| DKK1     | 10  | 1                  | 2.58E-01 | 1                  | 2.58E-01 | 1                  | 1.65E-01 | 1                  | 1.65E-01 | 1                  | 1.00E+00 | 1                  | 1.00E+00 |
| MSH3     | 5   | 3                  | 4.90E-01 | 3                  | 4.90E-01 | 3                  | 1.65E-01 | 3                  | 1.65E-01 | 3                  | 2.98E-01 | 3                  | 2.98E-01 |
| PALM3    | 19  | 2                  | 5.13E-03 | 2                  | 5.13E-03 | 2                  | 1.00E+00 | 2                  | 1.00E+00 | 2                  | 1.65E-01 | 2                  | 1.65E-01 |
| ATG4C    | 1   | 3                  | 5.23E-01 | 3                  | 5.23E-01 | 3                  | 1.66E-01 | 3                  | 1.66E-01 | 3                  | 2.81E-01 | 3                  | 2.81E-01 |
| SAMD11   | 1   | 5                  | 7.31E-01 | 5                  | 7.31E-01 | 4                  | 1.66E-01 | 4                  | 1.66E-01 | 4                  | 2.90E-01 | 4                  | 2.90E-01 |
| TRAP1    | 16  | 8                  | 1.00E+00 | 9                  | 1.00E+00 | 8                  | 1.68E-01 | 9                  | 1.66E-01 | 5                  | 2.12E-01 | 6                  | 2.03E-01 |
| SEC16B   | 1   | 8                  | 4.03E-01 | 9                  | 4.03E-01 | 9                  | 2.93E-01 | 10                 | 2.93E-01 | 5                  | 1.66E-01 | 6                  | 1.66E-01 |
| RBM46    | 4   | 3                  | 8.73E-01 | 3                  | 8.73E-01 | 2                  | 1.66E-01 | 2                  | 1.66E-01 | 2                  | 3.00E-01 | 2                  | 3.00E-01 |
| LIPE     | 19  | 4                  | 4.15E-01 | 4                  | 4.15E-01 | 4                  | 4.84E-01 | 4                  | 4.84E-01 | 3                  | 1.66E-01 | 3                  | 1.66E-01 |
| APTX     | 9   | 2                  | 9.29E-01 | 2                  | 9.29E-01 | 2                  | 1.66E-01 | 2                  | 1.66E-01 | 1                  | 2.12E-01 | 1                  | 2.12E-01 |
| TMPRSS9  | 19  | 12                 | 7.22E-02 | 12                 | 7.22E-02 | 8                  | 3.59E-01 | 8                  | 3.59E-01 | 6                  | 1.66E-01 | 6                  | 1.66E-01 |
| SCUBE1   | 22  | 3                  | 4.88E-01 | 3                  | 4.88E-01 | 3                  | 1.83E-01 | 3                  | 1.83E-01 | 2                  | 1.66E-01 | 2                  | 1.66E-01 |
| AIM1     | 6   | 11                 | 4.79E-01 | 12                 | 1.53E-03 | 8                  | 4.95E-01 | 9                  | 5.62E-01 | 4                  | 6.28E-01 | 5                  | 1.66E-01 |
| TNRC18   | 7   | 6                  | 1.05E-01 | 6                  | 1.05E-01 | 6                  | 5.08E-01 | 6                  | 5.08E-01 | 4                  | 1.67E-01 | 4                  | 1.67E-01 |
| DCLK3    | 3   | 3                  | 2.27E-01 | 3                  | 2.27E-01 | 3                  | 1.00E+00 | 3                  | 1.00E+00 | 1                  | 1.67E-01 | 1                  | 1.67E-01 |
| DHX58    | 17  | 8                  | 1.00E+00 | 8                  | 1.00E+00 | 7                  | 1.67E-01 | 7                  | 1.67E-01 | 5                  | 2.63E-01 | 5                  | 2.63E-01 |
| IRS1     | 2   | 3                  | 5.27E-01 | 3                  | 5.27E-01 | 1                  | 1.67E-01 | 1                  | 1.67E-01 | 3                  | 5.54E-01 | 3                  | 5.54E-01 |
| GLTSCR1L | 6   | 3                  | 6.72E-01 | 3                  | 6.72E-01 | 3                  | 1.67E-01 | 3                  | 1.67E-01 | 3                  | 3.64E-01 | 3                  | 3.64E-01 |
| TLE2     | 19  | 4                  | 1.00E+00 | 4                  | 1.00E+00 | 3                  | 1.67E-01 | 3                  | 1.67E-01 | 3                  | 2.99E-01 | 3                  | 2.99E-01 |
| RNF133   | 7   | 1                  | 7.71E-02 | 1                  | 7.71E-02 | 1                  | 3.62E-01 | 1                  | 3.62E-01 | 1                  | 1.67E-01 | 1                  | 1.67E-01 |
| KRTAP1-1 | 17  | 1                  | 7.52E-01 | 1                  | 7.52E-01 | 1                  | 4.98E-01 | 1                  | 4.98E-01 | 1                  | 1.67E-01 | 1                  | 1.67E-01 |
| SHTN1    | 10  | 2                  | 4.16E-01 | 2                  | 4.16E-01 | 3                  | 1.88E-01 | 3                  | 1.88E-01 | 2                  | 1.67E-01 | 2                  | 1.67E-01 |
| TP53I13  | 17  | 2                  | 2.23E-01 | 2                  | 2.23E-01 | 2                  | 2.68E-01 | 2                  | 2.68E-01 | 1                  | 1.67E-01 | 1                  | 1.67E-01 |
| PCDHB11  | 5   | 1                  | 6.91E-01 | 1                  | 6.91E-01 | 1                  | 1.67E-01 | 1                  | 1.67E-01 | 1                  | 2.16E-01 | 1                  | 2.16E-01 |
| BMPER    | 7   | 3                  | 1.81E-01 | 3                  | 1.81E-01 | 2                  | 3.14E-01 | 2                  | 3.14E-01 | 2                  | 1.68E-01 | 2                  | 1.68E-01 |
| NPHP1    | 2   | 2                  | 3.34E-01 | 2                  | 3.34E-01 | 2                  | 1.68E-01 | 2                  | 1.68E-01 | 2                  | 5.89E-01 | 2                  | 5.89E-01 |
| RP1      | 8   | 4                  | 5.89E-02 | 5                  | 5.89E-02 | 2                  | 2.87E-01 | 3                  | 2.87E-01 | 4                  | 1.68E-01 | 5                  | 1.68E-01 |
| TAAR5    | 6   | 2                  | 6.10E-01 | 2                  | 6.10E-01 | 2                  | 1.96E-01 | 2                  | 1.96E-01 | 1                  | 1.68E-01 | 1                  | 1.68E-01 |
| EBLN2    | 3   | 2                  | 8.45E-01 | 2                  | 8.45E-01 | 1                  | 1.68E-01 | 1                  | 1.68E-01 | 2                  | 2.74E-01 | 2                  | 2.74E-01 |
| KCNB1    | 20  | 2                  | 7.15E-01 | 2                  | 7.15E-01 | 2                  | 2.54E-01 | 2                  | 2.54E-01 | 1                  | 1.68E-01 | 1                  | 1.68E-01 |
| TMEM41A  | 3   | 3                  | 3.06E-04 | 3                  | 3.06E-04 | 2                  | 1.68E-01 | 2                  | 1.68E-01 | 3                  | 3.85E-01 | 3                  | 3.85E-01 |
| MS4A13   | 11  | 2                  | 3.03E-01 | 3                  | 3.14E-01 | 2                  | 1.68E-01 | 3                  | 1.73E-01 | 1                  | 3.79E-01 | 2                  | 4.08E-01 |
| SGOL2    | 2   | 4                  | 2.52E-01 | 4                  | 2.52E-01 | 4                  | 6.39E-01 | 4                  | 6.39E-01 | 3                  | 1.68E-01 | 3                  | 1.68E-01 |
| ZNF469   | 16  | 15                 | 2.56E-01 | 15                 | 2.56E-01 | 14                 | 1.68E-01 | 14                 | 1.68E-01 | 5                  | 3.41E-01 | 5                  | 3.41E-01 |
| TGFBR3   | 1   | 3                  | 5.07E-01 | 3                  | 5.07E-01 | 3                  | 1.68E-01 | 3                  | 1.68E-01 | 2                  | 4.05E-01 | 2                  | 4.05E-01 |
| FBRSL1   | 12  | 6                  | 2.26E-01 | 6                  | 2.26E-01 | 5                  | 1.68E-01 | 5                  | 1.68E-01 | 2                  | 2.60E-01 | 2                  | 2.60E-01 |
| CRTAM    | 11  | 3                  | 4.79E-01 | 3                  | 4.79E-01 | 3                  | 1.84E-01 | 3                  | 1.84E-01 | 2                  | 1.68E-01 | 2                  | 1.68E-01 |
| FANCM    | 14  | 10                 | 6.52E-01 | 10                 | 6.52E-01 | 9                  | 2.40E-01 | 9                  | 2.40E-01 | 6                  | 1.68E-01 | 6                  | 1.68E-01 |
| DVL2     | 17  | 5                  | 2.86E-01 | 5                  | 2.86E-01 | 2                  | 1.69E-01 | 2                  | 1.69E-01 | 4                  | 5.13E-01 | 4                  | 5.13E-01 |
| WISP1    | 8   | 1                  | 7.59E-01 | 2                  | 7.59E-01 | 1                  | 5.05E-01 | 2                  | 5.05E-01 | 1                  | 1.69E-01 | 1                  | 1.69E-01 |
| PKHD1    | 6   | 20                 | 6.49E-02 | 20                 | 6.49E-02 | 15                 | 3.73E-01 | 15                 | 3.73E-01 | 8                  | 1.69E-01 | 8                  | 1.69E-01 |

| SetID    | Chr | ADEH- vs NA        |          |                    |          | ADEH+ vs ADEH-     |          |                    |          | ADEH+ vs NA        |          |                    |          |
|----------|-----|--------------------|----------|--------------------|----------|--------------------|----------|--------------------|----------|--------------------|----------|--------------------|----------|
|          |     | rarenovel          |          | all                |          | rarenovel          |          | all                |          | rarenovel          |          | all                |          |
|          |     | N variants in test | p-value  | N variants in test | p-value  | N variants in test | p-value  | N variants in test | p-value  | N variants in test | p-value  | N variants in test | p-value  |
| C14orf80 | 14  | 4                  | 4.64E-01 | 4                  | 4.64E-01 | 3                  | 1.69E-01 | 3                  | 1.69E-01 | 4                  | 3.96E-01 | 4                  | 3.96E-01 |
| BCKDHA   | 19  | 2                  | 5.10E-02 | 2                  | 5.10E-02 | 2                  | 1.69E-01 | 2                  | 1.69E-01 | 1                  | 4.41E-01 | 1                  | 4.41E-01 |
| KMT2E    | 7   | 4                  | 5.21E-01 | 5                  | 1.00E+00 | 5                  | 3.50E-01 | 6                  | 4.12E-01 | 2                  | 1.69E-01 | 3                  | 2.36E-01 |
| ESYT1    | 12  | 8                  | 6.51E-01 | 8                  | 6.51E-01 | 5                  | 3.21E-01 | 5                  | 3.21E-01 | 5                  | 1.69E-01 | 5                  | 1.69E-01 |
| C9       | 5   | 9                  | 1.17E-01 | 9                  | 1.17E-01 | 9                  | 1.69E-01 | 9                  | 1.69E-01 | 4                  | 2.56E-01 | 4                  | 2.56E-01 |
| PSMB9    | 6   | 5                  | 4.67E-01 | 5                  | 4.67E-01 | 4                  | 1.69E-01 | 4                  | 1.69E-01 | 4                  | 3.01E-01 | 4                  | 3.01E-01 |
| PAQR7    | 1   | 3                  | 1.15E-01 | 3                  | 1.15E-01 | 3                  | 3.20E-01 | 3                  | 3.20E-01 | 2                  | 1.69E-01 | 2                  | 1.69E-01 |
| LDLRAD4  | 18  | 1                  | 7.25E-02 | 1                  | 7.25E-02 | 1                  | 1.00E+00 | 1                  | 1.00E+00 | 1                  | 1.69E-01 | 1                  | 1.69E-01 |
| G6PC     | 17  | 4                  | 3.03E-01 | 4                  | 3.03E-01 | 3                  | 1.70E-01 | 3                  | 1.70E-01 | 4                  | 5.38E-01 | 4                  | 5.38E-01 |
| OR1K1    | 9   | 3                  | 1.50E-01 | 3                  | 1.50E-01 | 3                  | 1.70E-01 | 3                  | 1.70E-01 | 3                  | 2.06E-01 | 3                  | 2.06E-01 |
| FOS      | 14  | 1                  | 2.29E-01 | 1                  | 2.29E-01 | 1                  | 1.00E+00 | 1                  | 1.00E+00 | 1                  | 1.70E-01 | 1                  | 1.70E-01 |
| UNC13C   | 15  | 12                 | 4.06E-01 | 12                 | 4.06E-01 | 10                 | 1.70E-01 | 10                 | 1.70E-01 | 5                  | 2.62E-01 | 5                  | 2.62E-01 |
| PELI2    | 14  | 2                  | 4.75E-01 | 2                  | 4.75E-01 | 2                  | 2.51E-01 | 2                  | 2.51E-01 | 1                  | 1.70E-01 | 1                  | 1.70E-01 |
| KANSL3   | 2   | 2                  | 8.74E-01 | 2                  | 8.74E-01 | 3                  | 1.84E-01 | 3                  | 1.84E-01 | 2                  | 1.70E-01 | 2                  | 1.70E-01 |
| CPZ      | 4   | 7                  | 1.65E-01 | 7                  | 1.65E-01 | 7                  | 1.70E-01 | 7                  | 1.70E-01 | 5                  | 1.84E-01 | 5                  | 1.84E-01 |
| GGT6     | 17  | 1                  | 1.00E+00 | 2                  | 1.00E+00 | 1                  | 1.70E-01 | 2                  | 1.70E-01 | 1                  | 2.04E-01 | 2                  | 2.04E-01 |
| MRPL10   | 17  | 1                  | 5.67E-01 | 1                  | 5.67E-01 | 1                  | 1.70E-01 | 1                  | 1.70E-01 | 1                  | 2.56E-01 | 1                  | 2.56E-01 |
| GSAP     | 7   | 1                  | 7.09E-01 | 1                  | 7.09E-01 | 1                  | 1.96E-01 | 1                  | 1.96E-01 | 1                  | 1.71E-01 | 1                  | 1.71E-01 |
| SH3RF1   | 4   | 2                  | 7.39E-01 | 2                  | 7.39E-01 | 2                  | 2.96E-01 | 2                  | 2.96E-01 | 1                  | 1.71E-01 | 1                  | 1.71E-01 |
| NELL1    | 11  | 6                  | 3.50E-01 | 6                  | 3.50E-01 | 7                  | 4.06E-01 | 7                  | 4.06E-01 | 2                  | 1.71E-01 | 2                  | 1.71E-01 |
| HEATR6   | 17  | 3                  | 5.86E-02 | 3                  | 5.86E-02 | 3                  | 1.71E-01 | 3                  | 1.71E-01 | 2                  | 2.09E-01 | 2                  | 2.09E-01 |
| RBL2     | 16  | 2                  | 3.07E-01 | 2                  | 3.07E-01 | 1                  | 2.08E-01 | 1                  | 2.08E-01 | 2                  | 1.71E-01 | 2                  | 1.71E-01 |
| OR4B1    | 11  | 2                  | 8.70E-01 | 3                  | 8.62E-01 | 2                  | 7.64E-01 | 3                  | 1.72E-01 | 2                  | 6.45E-01 | 3                  | 4.01E-01 |
| VPS13A   | 9   | 6                  | 5.54E-01 | 6                  | 5.54E-01 | 5                  | 4.79E-01 | 5                  | 4.79E-01 | 2                  | 1.72E-01 | 2                  | 1.72E-01 |
| SLC5A3   | 21  | 2                  | 9.80E-02 | 2                  | 9.80E-02 | 2                  | 1.72E-01 | 2                  | 1.72E-01 | 1                  | 1.00E+00 | 1                  | 1.00E+00 |
| CHST5    | 16  | 1                  | 4.09E-01 | 2                  | 4.29E-01 | 1                  | 4.44E-01 | 2                  | 4.01E-01 |                    |          | 1                  | 1.72E-01 |
| DDX10    | 11  | 3                  | 5.70E-02 | 3                  | 5.70E-02 | 2                  | 1.72E-01 | 2                  | 1.72E-01 | 2                  | 1.81E-01 | 2                  | 1.81E-01 |
| DDX54    | 12  | 5                  | 7.04E-01 | 5                  | 7.04E-01 | 5                  | 3.34E-01 | 5                  | 3.34E-01 | 1                  | 1.72E-01 | 1                  | 1.72E-01 |
| ALDH1B1  | 9   | 4                  | 4.92E-02 | 5                  | 4.07E-02 | 3                  | 3.57E-01 | 4                  | 3.34E-01 | 3                  | 1.88E-01 | 4                  | 1.72E-01 |
| DHX34    | 19  | 11                 | 7.67E-01 | 12                 | 7.62E-01 | 6                  | 1.77E-01 | 7                  | 1.80E-01 | 7                  | 1.72E-01 | 8                  | 2.05E-01 |
| ERBB2    | 17  | 3                  | 5.02E-01 | 3                  | 5.02E-01 | 3                  | 1.72E-01 | 3                  | 1.72E-01 | 2                  | 2.57E-01 | 2                  | 2.57E-01 |
| TMEM132D | 12  | 3                  | 2.66E-01 | 3                  | 2.66E-01 | 1                  | 1.73E-01 | 1                  | 1.73E-01 | 3                  | 3.12E-01 | 3                  | 3.12E-01 |
| RIMKLA   | 1   | 1                  | 5.05E-01 | 1                  | 5.05E-01 | 1                  | 1.84E-01 | 1                  | 1.84E-01 | 1                  | 1.73E-01 | 1                  | 1.73E-01 |
| EPHA6    | 3   | 3                  | 6.51E-01 | 3                  | 6.51E-01 | 2                  | 1.73E-01 | 2                  | 1.73E-01 | 2                  | 1.83E-01 | 2                  | 1.83E-01 |
| CEP295   | 11  | 4                  | 5.45E-01 | 4                  | 5.45E-01 | 4                  | 2.57E-01 | 4                  | 2.57E-01 | 2                  | 1.73E-01 | 2                  | 1.73E-01 |
| SEZ6L2   | 16  | 3                  | 6.94E-01 | 3                  | 6.94E-01 | 3                  | 1.73E-01 | 3                  | 1.73E-01 | 2                  | 2.44E-01 | 2                  | 2.44E-01 |
| FAM186A  | 12  | 6                  | 8.32E-01 | 7                  | 8.43E-01 | 6                  | 1.76E-01 | 7                  | 1.81E-01 | 2                  | 1.73E-01 | 3                  | 1.74E-01 |
| IGSF9    | 1   | 4                  | 7.09E-01 | 5                  | 8.28E-01 | 2                  | 3.88E-01 | 3                  | 1.73E-01 | 3                  | 3.91E-01 | 4                  | 2.76E-01 |
| EPN2     | 17  | 1                  | 2.88E-01 | 1                  | 2.88E-01 | 1                  | 1.73E-01 | 1                  | 1.73E-01 | 1                  | 1.00E+00 | 1                  | 1.00E+00 |
| FRS3     | 6   | 2                  | 2.27E-01 | 2                  | 2.27E-01 | 2                  | 1.73E-01 | 2                  | 1.73E-01 | 1                  | 2.05E-01 | 1                  | 2.05E-01 |
| TRIM58   | 1   | 5                  | 1.28E-01 | 5                  | 1.28E-01 | 4                  | 1.73E-01 | 4                  | 1.73E-01 | 3                  | 4.74E-01 | 3                  | 4.74E-01 |
| DIS3L    | 15  | 3                  | 9.61E-02 | 3                  | 9.61E-02 | 3                  | 1.74E-01 | 3                  | 1.74E-01 | 3                  | 3.94E-01 | 3                  | 3.94E-01 |
| C17orf62 | 17  | 2                  | 4.00E-01 | 2                  | 4.00E-01 | 2                  | 1.74E-01 | 2                  | 1.74E-01 | 1                  | 3.57E-01 | 1                  | 3.57E-01 |
| CUL9     | 6   | 6                  | 1.00E+00 | 6                  | 1.00E+00 | 6                  | 1.74E-01 | 6                  | 1.74E-01 | 5                  | 2.64E-01 | 5                  | 2.64E-01 |
| CDHR4    | 3   | 4                  | 4.33E-01 | 4                  | 4.33E-01 | 5                  | 3.53E-01 | 5                  | 3.53E-01 | 2                  | 1.74E-01 | 2                  | 1.74E-01 |
| SLCO1B7  | 12  | 5                  | 2.89E-01 | 7                  | 2.90E-01 | 5                  | 3.37E-01 | 7                  | 3.36E-01 | 1                  | 1.74E-01 | 3                  | 1.80E-01 |
| UTRN     | 6   | 10                 | 8.84E-01 | 10                 | 8.84E-01 | 12                 | 1.74E-01 | 12                 | 1.74E-01 | 7                  | 1.75E-01 | 7                  | 1.75E-01 |
| C15orf39 | 15  | 5                  | 1.00E+00 | 5                  | 1.00E+00 | 5                  | 1.99E-01 | 5                  | 1.99E-01 | 3                  | 1.74E-01 | 3                  | 1.74E-01 |



| SetID      | Chr | ADEH- vs NA        |          |                    |          | ADEH+ vs ADEH-     |          |                    |          | ADEH+ vs NA        |          |                    |          |
|------------|-----|--------------------|----------|--------------------|----------|--------------------|----------|--------------------|----------|--------------------|----------|--------------------|----------|
|            |     | rarenovel          |          | all                |          | rarenovel          |          | all                |          | rarenovel          |          | all                |          |
|            |     | N variants in test | p-value  | N variants in test | p-value  | N variants in test | p-value  | N variants in test | p-value  | N variants in test | p-value  | N variants in test | p-value  |
| KIF17      | 1   | 8                  | 2.81E-01 | 8                  | 2.81E-01 | 7                  | 1.74E-01 | 7                  | 1.74E-01 | 4                  | 2.49E-01 | 4                  | 2.49E-01 |
| ZC3H3      | 8   | 8                  | 6.36E-01 | 8                  | 6.36E-01 | 7                  | 4.17E-01 | 7                  | 4.17E-01 | 7                  | 1.74E-01 | 7                  | 1.74E-01 |
| CDH24      | 14  | 3                  | 4.79E-01 | 3                  | 4.79E-01 | 3                  | 2.73E-01 | 3                  | 2.73E-01 | 1                  | 1.75E-01 | 1                  | 1.75E-01 |
| OR2L3      | 1   |                    |          | 1                  | 7.08E-01 |                    |          | 1                  | 1.75E-01 |                    |          | 1                  | 2.59E-01 |
| MCM4       | 8   | 3                  | 7.69E-01 | 3                  | 7.69E-01 | 3                  | 3.15E-01 | 3                  | 3.15E-01 | 2                  | 1.75E-01 | 2                  | 1.75E-01 |
| ZACN       | 17  | 2                  | 1.00E+00 | 3                  | 1.00E+00 | 2                  | 2.12E-01 | 3                  | 1.75E-01 | 1                  | 2.07E-01 | 2                  | 1.88E-01 |
| ALDOB      | 9   | 3                  | 6.83E-01 | 3                  | 6.83E-01 | 2                  | 1.75E-01 | 2                  | 1.75E-01 | 3                  | 2.91E-01 | 3                  | 2.91E-01 |
| DAPL1      | 2   | 2                  | 7.09E-01 | 2                  | 7.09E-01 | 2                  | 2.99E-01 | 2                  | 2.99E-01 | 1                  | 1.75E-01 | 1                  | 1.75E-01 |
| SLC44A2    | 19  | 2                  | 2.03E-01 | 2                  | 2.03E-01 | 1                  | 1.75E-01 | 1                  | 1.75E-01 | 2                  | 4.66E-01 | 2                  | 4.66E-01 |
| DEFA4      | 8   | 1                  | 1.00E+00 | 1                  | 1.00E+00 | 1                  | 1.75E-01 | 1                  | 1.75E-01 | 1                  | 2.22E-01 | 1                  | 2.22E-01 |
| ALDH16A1   | 19  | 8                  | 1.17E-01 | 8                  | 1.17E-01 | 3                  | 1.75E-01 | 3                  | 1.75E-01 | 7                  | 9.13E-01 | 7                  | 9.13E-01 |
| DIS3       | 13  | 5                  | 1.61E-01 | 5                  | 1.61E-01 | 4                  | 1.75E-01 | 4                  | 1.75E-01 | 4                  | 5.94E-01 | 4                  | 5.94E-01 |
| ZDHHC5     | 11  | 4                  | 8.63E-03 | 4                  | 8.63E-03 | 3                  | 1.75E-01 | 3                  | 1.75E-01 | 2                  | 1.00E+00 | 2                  | 1.00E+00 |
| KIAA1614   | 1   | 5                  | 2.41E-01 | 6                  | 5.58E-01 | 5                  | 6.12E-01 | 6                  | 3.40E-01 | 5                  | 2.23E-01 | 6                  | 1.75E-01 |
| CSMD3      | 8   | 12                 | 3.88E-01 | 12                 | 3.88E-01 | 8                  | 1.75E-01 | 8                  | 1.75E-01 | 9                  | 4.82E-01 | 9                  | 4.82E-01 |
| NLRP3      | 1   | 3                  | 5.11E-01 | 3                  | 5.11E-01 | 3                  | 1.85E-01 | 3                  | 1.85E-01 | 2                  | 1.75E-01 | 2                  | 1.75E-01 |
| FBXO15     | 18  |                    |          | 1                  | 1.33E-01 |                    |          | 1                  | 4.35E-01 |                    |          | 1                  | 1.75E-01 |
| ARHGAP17   | 16  | 2                  | 5.26E-01 | 2                  | 5.26E-01 | 1                  | 1.76E-01 | 1                  | 1.76E-01 | 2                  | 3.67E-01 | 2                  | 3.67E-01 |
| ALOX15B    | 17  | 6                  | 4.55E-01 | 6                  | 4.55E-01 | 5                  | 1.76E-01 | 5                  | 1.76E-01 | 3                  | 2.30E-01 | 3                  | 2.30E-01 |
| PIKFYVE    | 2   | 4                  | 8.66E-02 | 4                  | 8.66E-02 | 3                  | 1.76E-01 | 3                  | 1.76E-01 | 4                  | 4.96E-01 | 4                  | 4.96E-01 |
| MCF2L2     | 3   | 5                  | 6.02E-01 | 5                  | 6.02E-01 | 4                  | 1.76E-01 | 4                  | 1.76E-01 | 5                  | 2.90E-01 | 5                  | 2.90E-01 |
| ACOX2      | 3   | 4                  | 3.23E-01 | 4                  | 3.23E-01 | 3                  | 1.77E-01 | 3                  | 1.77E-01 | 3                  | 3.92E-01 | 3                  | 3.92E-01 |
| KPNA7      | 7   | 8                  | 4.98E-01 | 8                  | 4.98E-01 | 7                  | 1.77E-01 | 7                  | 1.77E-01 | 6                  | 2.18E-01 | 6                  | 2.18E-01 |
| ST20-MTHFS | 15  | 3                  | 6.96E-01 | 3                  | 6.96E-01 | 3                  | 1.77E-01 | 3                  | 1.77E-01 | 2                  | 2.18E-01 | 2                  | 2.18E-01 |
| IMMP1L     | 11  | 1                  | 4.94E-01 | 1                  | 4.94E-01 | 1                  | 2.15E-01 | 1                  | 2.15E-01 | 1                  | 1.77E-01 | 1                  | 1.77E-01 |
| STEAP2     | 7   | 4                  | 5.05E-01 | 4                  | 5.05E-01 | 5                  | 3.17E-01 | 5                  | 3.17E-01 | 2                  | 1.77E-01 | 2                  | 1.77E-01 |
| ZMYND15    | 17  | 3                  | 1.51E-01 | 3                  | 1.51E-01 | 2                  | 1.00E+00 | 2                  | 1.00E+00 | 2                  | 1.77E-01 | 2                  | 1.77E-01 |
| SENP6      | 6   | 2                  | 1.00E+00 | 2                  | 1.00E+00 | 3                  | 2.32E-01 | 3                  | 2.32E-01 | 2                  | 1.77E-01 | 2                  | 1.77E-01 |
| HMGXB3     | 5   | 2                  | 7.66E-01 | 2                  | 7.66E-01 | 2                  | 1.77E-01 | 2                  | 1.77E-01 | 1                  | 2.49E-01 | 1                  | 2.49E-01 |
| CCSER1     | 4   | 5                  | 1.64E-02 | 5                  | 1.64E-02 | 5                  | 2.31E-01 | 5                  | 2.31E-01 | 2                  | 1.78E-01 | 2                  | 1.78E-01 |
| ZNF774     | 15  | 2                  | 9.18E-01 | 2                  | 9.18E-01 | 2                  | 1.78E-01 | 2                  | 1.78E-01 | 1                  | 2.21E-01 | 1                  | 2.21E-01 |
| C11orf49   | 11  | 3                  | 7.25E-01 | 3                  | 7.25E-01 | 3                  | 1.78E-01 | 3                  | 1.78E-01 | 3                  | 2.34E-01 | 3                  | 2.34E-01 |
| GRID2IP    | 7   | 5                  | 1.70E-01 | 6                  | 1.13E-01 | 5                  | 7.48E-01 | 6                  | 7.60E-01 | 1                  | 1.78E-01 | 2                  | 2.11E-01 |
| ADGRL2     | 1   | 4                  | 6.35E-01 | 4                  | 6.35E-01 | 4                  | 2.51E-01 | 4                  | 2.51E-01 | 2                  | 1.78E-01 | 2                  | 1.78E-01 |
| B4GALNT2   | 17  | 4                  | 5.36E-01 | 5                  | 4.99E-01 | 4                  | 3.96E-01 | 5                  | 3.28E-01 | 2                  | 2.26E-01 | 3                  | 1.78E-01 |
| CDK18      | 1   | 3                  | 7.05E-01 | 3                  | 7.05E-01 | 3                  | 1.78E-01 | 3                  | 1.78E-01 | 3                  | 3.02E-01 | 3                  | 3.02E-01 |
| DGUOK      | 2   | 1                  | 4.33E-01 | 1                  | 4.33E-01 | 1                  | 5.04E-01 | 1                  | 5.04E-01 | 1                  | 1.78E-01 | 1                  | 1.78E-01 |
| IDI1       | 10  | 1                  | 7.69E-01 | 1                  | 7.69E-01 | 1                  | 1.78E-01 | 1                  | 1.78E-01 | 1                  | 1.88E-01 | 1                  | 1.88E-01 |
| LRPPRC     | 2   | 4                  | 3.10E-01 | 4                  | 3.10E-01 | 3                  | 1.78E-01 | 3                  | 1.78E-01 | 3                  | 4.25E-01 | 3                  | 4.25E-01 |
| POLH       | 6   | 1                  | 3.14E-01 | 1                  | 3.14E-01 | 1                  | 1.78E-01 | 1                  | 1.78E-01 | 1                  | 1.00E+00 | 1                  | 1.00E+00 |
| C1orf159   | 1   | 3                  | 5.05E-01 | 3                  | 5.05E-01 | 2                  | 2.29E-01 | 2                  | 2.29E-01 | 2                  | 1.78E-01 | 2                  | 1.78E-01 |
| GLB1       | 3   | 1                  | 3.02E-02 | 1                  | 3.02E-02 | 1                  | 1.78E-01 | 1                  | 1.78E-01 | 1                  | 1.00E+00 | 1                  | 1.00E+00 |
| FAM193A    | 4   | 4                  | 7.45E-01 | 4                  | 7.45E-01 | 4                  | 1.78E-01 | 4                  | 1.78E-01 | 3                  | 3.70E-01 | 3                  | 3.70E-01 |
| CORO1B     | 11  | 2                  | 1.00E+00 | 2                  | 1.00E+00 | 2                  | 2.79E-01 | 2                  | 2.79E-01 | 1                  | 1.79E-01 | 1                  | 1.79E-01 |
| CCDC28B    | 1   | 2                  | 2.68E-01 | 2                  | 2.68E-01 | 2                  | 1.79E-01 | 2                  | 1.79E-01 | 1                  | 3.86E-01 | 1                  | 3.86E-01 |
| ALLC       | 2   | 3                  | 3.58E-01 | 3                  | 3.58E-01 | 3                  | 1.79E-01 | 3                  | 1.79E-01 | 2                  | 6.47E-01 | 2                  | 6.47E-01 |
| MYO3B      | 2   | 6                  | 6.30E-01 | 6                  | 6.30E-01 | 5                  | 1.79E-01 | 5                  | 1.79E-01 | 3                  | 2.01E-01 | 3                  | 2.01E-01 |
| ATXN7      | 3   | 3                  | 3.72E-01 | 3                  | 3.72E-01 | 4                  | 2.43E-01 | 4                  | 2.43E-01 | 2                  | 1.79E-01 | 2                  | 1.79E-01 |

| SetID     | Chr | ADEH- vs NA        |          |                    |          | ADEH+ vs ADEH-     |          |                    |          | ADEH+ vs NA        |          |                    |          |
|-----------|-----|--------------------|----------|--------------------|----------|--------------------|----------|--------------------|----------|--------------------|----------|--------------------|----------|
|           |     | rarenovel          |          | all                |          | rarenovel          |          | all                |          | rarenovel          |          | all                |          |
|           |     | N variants in test | p-value  | N variants in test | p-value  | N variants in test | p-value  | N variants in test | p-value  | N variants in test | p-value  | N variants in test | p-value  |
| PIP5KL1   | 9   | 3                  | 7.19E-01 | 3                  | 7.19E-01 | 2                  | 1.80E-01 | 2                  | 1.80E-01 | 2                  | 3.93E-01 | 2                  | 3.93E-01 |
| MPHOSPH10 | 2   | 2                  | 8.59E-01 | 2                  | 8.59E-01 | 2                  | 1.80E-01 | 2                  | 1.80E-01 | 2                  | 2.46E-01 | 2                  | 2.46E-01 |
| GRIN2C    | 17  | 1                  | 3.81E-01 | 1                  | 3.81E-01 | 1                  | 1.80E-01 | 1                  | 1.80E-01 | 1                  | 1.00E+00 | 1                  | 1.00E+00 |
| FSTL5     | 4   | 10                 | 8.19E-01 | 11                 | 2.44E-01 | 7                  | 3.26E-01 | 8                  | 1.80E-01 | 4                  | 4.06E-01 | 5                  | 1.94E-01 |
| POLM      | 7   | 1                  | 9.61E-02 | 1                  | 9.61E-02 | 1                  | 3.56E-01 | 1                  | 3.56E-01 | 1                  | 1.80E-01 | 1                  | 1.80E-01 |
| TRAF3IP1  | 2   | 3                  | 8.28E-01 | 3                  | 8.28E-01 | 3                  | 1.80E-01 | 3                  | 1.80E-01 | 3                  | 2.89E-01 | 3                  | 2.89E-01 |
| OR6N1     | 1   | 2                  | 2.68E-01 | 2                  | 2.68E-01 | 1                  | 1.81E-01 | 1                  | 1.81E-01 | 2                  | 3.50E-01 | 2                  | 3.50E-01 |
| SCN7A     | 2   | 8                  | 1.28E-01 | 8                  | 1.28E-01 | 8                  | 8.50E-01 | 8                  | 8.50E-01 | 3                  | 1.81E-01 | 3                  | 1.81E-01 |
| USP42     | 7   | 5                  | 5.48E-01 | 5                  | 5.48E-01 | 4                  | 1.81E-01 | 4                  | 1.81E-01 | 3                  | 2.75E-01 | 3                  | 2.75E-01 |
| CYP3A43   | 7   | 6                  | 2.19E-01 | 6                  | 2.19E-01 | 5                  | 4.64E-01 | 5                  | 4.64E-01 | 2                  | 1.81E-01 | 2                  | 1.81E-01 |
| ARL5C     | 17  |                    |          | 1                  | 7.58E-01 |                    |          | 1                  | 1.81E-01 |                    |          | 1                  | 2.13E-01 |
| MTG1      | 10  | 4                  | 7.57E-01 | 4                  | 7.57E-01 | 4                  | 3.77E-01 | 4                  | 3.77E-01 | 1                  | 1.82E-01 | 1                  | 1.82E-01 |
| ZNF205    | 16  | 3                  | 3.64E-01 | 3                  | 3.64E-01 | 2                  | 1.82E-01 | 2                  | 1.82E-01 | 2                  | 4.82E-01 | 2                  | 4.82E-01 |
| SREBF1    | 17  | 1                  | 4.34E-01 | 1                  | 4.34E-01 | 1                  | 2.96E-01 | 1                  | 2.96E-01 | 1                  | 1.82E-01 | 1                  | 1.82E-01 |
| WRNIP1    | 6   | 2                  | 1.00E+00 | 2                  | 1.00E+00 | 3                  | 1.82E-01 | 3                  | 1.82E-01 | 2                  | 1.94E-01 | 2                  | 1.94E-01 |
| NVL       | 1   | 1                  | 3.73E-01 | 1                  | 3.73E-01 | 1                  | 1.82E-01 | 1                  | 1.82E-01 | 1                  | 3.30E-01 | 1                  | 3.30E-01 |
| TNN       | 1   | 5                  | 4.93E-01 | 5                  | 4.93E-01 | 4                  | 1.82E-01 | 4                  | 1.82E-01 | 3                  | 2.87E-01 | 3                  | 2.87E-01 |
| KCNE2     | 21  | 4                  | 4.77E-01 | 4                  | 4.77E-01 | 4                  | 3.12E-01 | 4                  | 3.12E-01 | 1                  | 1.82E-01 | 1                  | 1.82E-01 |
| OR10P1    | 12  | 3                  | 6.07E-02 | 3                  | 6.07E-02 | 2                  | 1.82E-01 | 2                  | 1.82E-01 | 2                  | 1.00E+00 | 2                  | 1.00E+00 |
| ACVRL1    | 12  | 2                  | 1.00E+00 | 2                  | 1.00E+00 | 3                  | 1.82E-01 | 3                  | 1.82E-01 | 3                  | 3.35E-01 | 3                  | 3.35E-01 |
| ZNF610    | 19  | 6                  | 2.32E-01 | 6                  | 2.32E-01 | 6                  | 2.38E-01 | 6                  | 2.38E-01 | 2                  | 1.82E-01 | 2                  | 1.82E-01 |
| HABP2     | 10  | 4                  | 1.00E+00 | 4                  | 1.00E+00 | 4                  | 2.21E-01 | 4                  | 2.21E-01 | 3                  | 1.83E-01 | 3                  | 1.83E-01 |
| SYNJ2     | 6   | 7                  | 2.17E-01 | 7                  | 2.17E-01 | 8                  | 3.26E-01 | 8                  | 3.26E-01 | 5                  | 1.83E-01 | 5                  | 1.83E-01 |
| DSG1      | 18  | 3                  | 4.86E-01 | 4                  | 5.10E-01 | 4                  | 1.84E-01 | 5                  | 1.83E-01 | 3                  | 2.68E-01 | 4                  | 2.67E-01 |
| GHRL      | 3   | 1                  | 2.18E-01 | 1                  | 2.18E-01 | 1                  | 3.56E-01 | 1                  | 3.56E-01 | 1                  | 1.83E-01 | 1                  | 1.83E-01 |
| AIFM2     | 10  | 4                  | 2.40E-01 | 4                  | 2.40E-01 | 4                  | 3.08E-01 | 4                  | 3.08E-01 | 3                  | 1.83E-01 | 3                  | 1.83E-01 |
| OLAH      | 10  | 1                  | 8.05E-01 | 1                  | 8.05E-01 | 1                  | 1.83E-01 | 1                  | 1.83E-01 | 1                  | 2.04E-01 | 1                  | 2.04E-01 |
| FARP2     | 2   | 7                  | 4.49E-01 | 8                  | 4.70E-01 | 6                  | 3.20E-01 | 7                  | 3.31E-01 | 3                  | 1.83E-01 | 4                  | 2.14E-01 |
| EPHA10    | 1   | 5                  | 5.64E-01 | 6                  | 7.09E-01 | 5                  | 2.37E-01 | 6                  | 1.83E-01 | 2                  | 3.77E-01 | 3                  | 2.46E-01 |
| TRIM42    | 3   | 2                  | 2.94E-01 | 2                  | 2.94E-01 | 2                  | 3.96E-01 | 2                  | 3.96E-01 | 1                  | 1.83E-01 | 1                  | 1.83E-01 |
| SLC39A12  | 10  | 4                  | 8.82E-01 | 4                  | 8.82E-01 | 3                  | 1.84E-01 | 3                  | 1.84E-01 | 3                  | 2.02E-01 | 3                  | 2.02E-01 |
| BECN2     | 1   | 2                  | 5.94E-01 | 2                  | 5.94E-01 | 2                  | 2.09E-01 | 2                  | 2.09E-01 | 1                  | 1.84E-01 | 1                  | 1.84E-01 |
| KDR       | 4   | 5                  | 8.57E-01 | 5                  | 8.57E-01 | 4                  | 1.84E-01 | 4                  | 1.84E-01 | 2                  | 2.11E-01 | 2                  | 2.11E-01 |
| MC1R      | 16  | 7                  | 2.23E-01 | 9                  | 3.93E-01 | 7                  | 4.40E-01 | 9                  | 5.05E-01 | 5                  | 1.84E-01 | 7                  | 2.11E-01 |
| GPA33     | 1   | 2                  | 3.36E-01 | 2                  | 3.36E-01 | 2                  | 1.84E-01 | 2                  | 1.84E-01 | 1                  | 2.28E-01 | 1                  | 2.28E-01 |
| MTRR      | 5   | 5                  | 4.38E-01 | 5                  | 4.38E-01 | 5                  | 1.84E-01 | 5                  | 1.84E-01 | 3                  | 3.09E-01 | 3                  | 3.09E-01 |
| DYM       | 18  | 2                  | 7.55E-02 | 2                  | 7.55E-02 | 2                  | 1.84E-01 | 2                  | 1.84E-01 | 1                  | 1.00E+00 | 1                  | 1.00E+00 |
| NOP9      | 14  | 3                  | 9.75E-02 | 3                  | 9.75E-02 | 3                  | 1.84E-01 | 3                  | 1.84E-01 | 4                  | 4.61E-01 | 4                  | 4.61E-01 |
| PARD6B    | 20  | 3                  | 7.67E-01 | 3                  | 7.67E-01 | 3                  | 3.13E-01 | 3                  | 3.13E-01 | 1                  | 1.84E-01 | 1                  | 1.84E-01 |
| NOTCH4    | 6   | 5                  | 6.26E-01 | 5                  | 6.26E-01 | 5                  | 1.85E-01 | 5                  | 1.85E-01 | 3                  | 3.18E-01 | 3                  | 3.18E-01 |
| C2CD4C    | 19  | 1                  | 1.50E-02 | 1                  | 1.50E-02 | 1                  | 1.85E-01 | 1                  | 1.85E-01 |                    |          |                    |          |
| THSD7B    | 2   | 7                  | 8.34E-01 | 7                  | 8.34E-01 | 6                  | 2.00E-01 | 6                  | 2.00E-01 | 3                  | 1.85E-01 | 3                  | 1.85E-01 |
| SLC45A2   | 5   | 1                  | 7.51E-01 | 2                  | 1.16E-01 | 1                  | 4.61E-01 | 2                  | 1.85E-01 |                    |          | 1                  | 5.18E-01 |
| ZNF223    | 19  | 2                  | 8.33E-01 | 2                  | 8.33E-01 | 3                  | 1.85E-01 | 3                  | 1.85E-01 | 3                  | 2.66E-01 | 3                  | 2.66E-01 |
| DRC3      | 17  | 5                  | 1.00E+00 | 6                  | 1.00E+00 | 5                  | 1.85E-01 | 6                  | 1.85E-01 | 3                  | 2.51E-01 | 4                  | 2.51E-01 |
| URAD      | 13  |                    |          | 1                  | 8.03E-01 |                    |          | 1                  | 1.85E-01 |                    |          | 1                  | 1.87E-01 |
| CRB2      | 9   | 5                  | 2.78E-01 | 5                  | 2.78E-01 | 4                  | 6.03E-01 | 4                  | 6.03E-01 | 3                  | 1.85E-01 | 3                  | 1.85E-01 |
| CDKL1     | 14  | 4                  | 3.42E-01 | 4                  | 3.42E-01 | 3                  | 1.85E-01 | 3                  | 1.85E-01 | 3                  | 3.91E-01 | 3                  | 3.91E-01 |

| SetID    | Chr | ADEH- vs NA        |          |                    |          | ADEH+ vs ADEH-     |          |                    |          | ADEH+ vs NA        |          |                    |          |
|----------|-----|--------------------|----------|--------------------|----------|--------------------|----------|--------------------|----------|--------------------|----------|--------------------|----------|
|          |     | rarenovel          |          | all                |          | rarenovel          |          | all                |          | rarenovel          |          | all                |          |
|          |     | N variants in test | p-value  | N variants in test | p-value  | N variants in test | p-value  | N variants in test | p-value  | N variants in test | p-value  | N variants in test | p-value  |
| KCNC2    | 12  | 1                  | 2.99E-01 | 1                  | 2.99E-01 | 1                  | 1.85E-01 | 1                  | 1.85E-01 | 1                  | 4.45E-01 | 1                  | 4.45E-01 |
| LURAP1L  | 9   | 4                  | 7.86E-01 | 4                  | 7.86E-01 | 3                  | 2.60E-01 | 3                  | 2.60E-01 | 2                  | 1.85E-01 | 2                  | 1.85E-01 |
| ITGAM    | 16  | 3                  | 4.39E-01 | 3                  | 4.39E-01 | 2                  | 2.78E-01 | 2                  | 2.78E-01 | 2                  | 1.85E-01 | 2                  | 1.85E-01 |
| NAALAD2  | 11  | 2                  | 5.57E-01 | 2                  | 5.57E-01 | 2                  | 4.29E-01 | 2                  | 4.29E-01 | 1                  | 1.85E-01 | 1                  | 1.85E-01 |
| FAM65A   | 16  | 3                  | 7.91E-01 | 3                  | 7.91E-01 | 2                  | 1.85E-01 | 2                  | 1.85E-01 | 3                  | 2.55E-01 | 3                  | 2.55E-01 |
| BMP3     | 4   | 4                  | 2.47E-01 | 4                  | 2.47E-01 | 2                  | 1.86E-01 | 2                  | 1.86E-01 | 3                  | 6.23E-01 | 3                  | 6.23E-01 |
| MYO16    | 13  | 5                  | 7.84E-03 | 5                  | 7.84E-03 | 1                  | 1.92E-01 | 1                  | 1.92E-01 | 5                  | 1.86E-01 | 5                  | 1.86E-01 |
| ODF3L2   | 19  | 2                  | 8.77E-01 | 2                  | 8.77E-01 | 2                  | 2.78E-01 | 2                  | 2.78E-01 | 1                  | 1.86E-01 | 1                  | 1.86E-01 |
| MCM10    | 10  | 5                  | 2.22E-01 | 6                  | 2.22E-01 | 3                  | 1.86E-01 | 4                  | 1.87E-01 | 4                  | 2.92E-01 | 5                  | 2.88E-01 |
| CAPN2    | 1   | 6                  | 2.79E-03 | 6                  | 2.79E-03 | 4                  | 1.86E-01 | 4                  | 1.86E-01 | 4                  | 5.31E-01 | 4                  | 5.31E-01 |
| VNN2     | 6   | 3                  | 3.91E-01 | 3                  | 3.91E-01 | 3                  | 2.71E-01 | 3                  | 2.71E-01 | 1                  | 1.87E-01 | 1                  | 1.87E-01 |
| NAALADL2 | 3   | 5                  | 7.54E-01 | 6                  | 7.63E-01 | 5                  | 3.07E-01 | 6                  | 3.07E-01 | 2                  | 1.87E-01 | 3                  | 1.87E-01 |
| SIAE     | 11  | 4                  | 3.42E-01 | 4                  | 3.42E-01 | 2                  | 1.87E-01 | 2                  | 1.87E-01 | 3                  | 3.85E-01 | 3                  | 3.85E-01 |
| TEAD4    | 12  | 1                  | 8.66E-02 | 1                  | 8.66E-02 | 1                  | 1.00E+00 | 1                  | 1.00E+00 | 1                  | 1.87E-01 | 1                  | 1.87E-01 |
| MYEOV2   | 2   | 2                  | 8.85E-01 | 2                  | 8.85E-01 | 1                  | 1.87E-01 | 1                  | 1.87E-01 | 2                  | 2.89E-01 | 2                  | 2.89E-01 |
| SAMD10   | 20  | 2                  | 6.46E-01 | 2                  | 6.46E-01 | 1                  | 1.87E-01 | 1                  | 1.87E-01 | 2                  | 3.03E-01 | 2                  | 3.03E-01 |
| WDR78    | 1   | 4                  | 9.99E-02 | 4                  | 9.99E-02 | 4                  | 2.01E-01 | 4                  | 2.01E-01 | 2                  | 1.87E-01 | 2                  | 1.87E-01 |
| GMEB1    | 1   | 1                  | 9.34E-02 | 1                  | 9.34E-02 | 1                  | 1.87E-01 | 1                  | 1.87E-01 | 1                  | 6.46E-01 | 1                  | 6.46E-01 |
| SYNE1    | 6   | 41                 | 4.07E-01 | 42                 | 4.12E-01 | 36                 | 2.86E-01 | 37                 | 2.87E-01 | 19                 | 1.87E-01 | 20                 | 1.89E-01 |
| IL17RB   | 3   | 2                  | 4.63E-01 | 3                  | 2.31E-01 | 1                  | 2.75E-01 | 2                  | 1.87E-01 | 2                  | 2.63E-01 | 3                  | 4.50E-01 |
| CLSTN3   | 12  | 6                  | 8.92E-03 | 6                  | 8.92E-03 | 3                  | 7.14E-01 | 3                  | 7.14E-01 | 5                  | 1.88E-01 | 5                  | 1.88E-01 |
| PPP1R3A  | 7   | 5                  | 4.24E-01 | 6                  | 2.79E-01 | 5                  | 3.59E-01 | 6                  | 3.60E-01 | 3                  | 1.88E-01 | 4                  | 2.48E-01 |
| TMPRSS3  | 21  | 5                  | 4.38E-01 | 5                  | 4.38E-01 | 5                  | 1.88E-01 | 5                  | 1.88E-01 | 2                  | 4.58E-01 | 2                  | 4.58E-01 |
| PIP      | 7   | 1                  | 6.04E-01 | 1                  | 6.04E-01 | 1                  | 1.88E-01 | 1                  | 1.88E-01 | 1                  | 3.39E-01 | 1                  | 3.39E-01 |
| SKIV2L2  | 5   | 2                  | 8.91E-01 | 2                  | 8.91E-01 | 2                  | 2.62E-01 | 2                  | 2.62E-01 | 1                  | 1.88E-01 | 1                  | 1.88E-01 |
| SYCP2L   | 6   | 3                  | 2.14E-03 | 3                  | 2.14E-03 | 2                  | 1.88E-01 | 2                  | 1.88E-01 | 3                  | 7.40E-01 | 3                  | 7.40E-01 |
| SKOR1    | 15  | 2                  | 4.57E-01 | 2                  | 4.57E-01 | 1                  | 2.78E-01 | 1                  | 2.78E-01 | 2                  | 1.88E-01 | 2                  | 1.88E-01 |
| EHBP1L1  | 11  | 3                  | 5.54E-01 | 3                  | 5.54E-01 | 4                  | 2.58E-01 | 4                  | 2.58E-01 | 2                  | 1.88E-01 | 2                  | 1.88E-01 |
| NAV1     | 1   | 7                  | 5.58E-01 | 8                  | 7.64E-01 | 4                  | 4.29E-01 | 5                  | 2.02E-01 | 4                  | 4.00E-01 | 5                  | 1.88E-01 |
| SCTR     | 2   | 4                  | 1.96E-01 | 4                  | 1.96E-01 | 3                  | 1.88E-01 | 3                  | 1.88E-01 | 4                  | 6.84E-01 | 4                  | 6.84E-01 |
| DDX4     | 5   | 1                  | 4.05E-01 | 1                  | 4.05E-01 | 1                  | 2.70E-01 | 1                  | 2.70E-01 | 1                  | 1.89E-01 | 1                  | 1.89E-01 |
| GUCA1C   | 3   | 3                  | 1.00E+00 | 3                  | 1.00E+00 | 3                  | 2.40E-01 | 3                  | 2.40E-01 | 1                  | 1.89E-01 | 1                  | 1.89E-01 |
| PLEKHG4  | 16  | 5                  | 5.96E-01 | 5                  | 5.96E-01 | 5                  | 4.05E-01 | 5                  | 4.05E-01 | 2                  | 1.89E-01 | 2                  | 1.89E-01 |
| PEAR1    | 1   | 4                  | 1.51E-01 | 4                  | 1.51E-01 | 2                  | 4.33E-01 | 2                  | 4.33E-01 | 3                  | 1.89E-01 | 3                  | 1.89E-01 |
| PRAM1    | 19  | 4                  | 2.07E-01 | 5                  | 2.08E-01 | 4                  | 1.00E+00 | 5                  | 1.00E+00 | 1                  | 1.89E-01 | 2                  | 1.89E-01 |
| SUSD1    | 9   | 7                  | 2.17E-01 | 7                  | 2.17E-01 | 6                  | 2.70E-01 | 6                  | 2.70E-01 | 3                  | 1.89E-01 | 3                  | 1.89E-01 |
| OCLN     | 5   | 1                  | 4.43E-01 | 1                  | 4.43E-01 | 1                  | 2.02E-01 | 1                  | 2.02E-01 | 1                  | 1.89E-01 | 1                  | 1.89E-01 |
| TIRAP    | 11  | 2                  | 2.01E-01 | 2                  | 2.01E-01 | 2                  | 1.89E-01 | 2                  | 1.89E-01 | 1                  | 2.72E-01 | 1                  | 2.72E-01 |
| ATAD2    | 8   | 2                  | 6.73E-01 | 2                  | 6.73E-01 | 1                  | 1.90E-01 | 1                  | 1.90E-01 | 2                  | 3.66E-01 | 2                  | 3.66E-01 |
| MLLT4    | 6   | 4                  | 8.11E-02 | 4                  | 8.11E-02 | 4                  | 4.83E-01 | 4                  | 4.83E-01 | 1                  | 1.90E-01 | 1                  | 1.90E-01 |
| EPHA1    | 7   | 3                  | 7.40E-01 | 4                  | 1.70E-02 | 3                  | 2.56E-01 | 4                  | 3.28E-01 | 1                  | 1.90E-01 | 2                  | 2.33E-01 |
| BMP1     | 8   | 3                  | 7.03E-02 | 3                  | 7.03E-02 | 3                  | 4.18E-01 | 3                  | 4.18E-01 | 2                  | 1.90E-01 | 2                  | 1.90E-01 |
| FER      | 5   | 4                  | 6.76E-01 | 4                  | 6.76E-01 | 4                  | 1.90E-01 | 4                  | 1.90E-01 | 2                  | 3.85E-01 | 2                  | 3.85E-01 |
| OR5B3    | 11  | 1                  | 2.06E-01 | 2                  | 2.06E-01 | 1                  | 1.00E+00 | 2                  | 1.00E+00 | 1                  | 1.90E-01 | 2                  | 1.90E-01 |
| ZNF781   | 19  |                    |          | 1                  | 3.29E-01 |                    |          | 1                  | 3.13E-01 |                    |          | 1                  | 1.91E-01 |
| MTMR11   | 1   | 3                  | 3.17E-03 | 3                  | 3.17E-03 | 3                  | 6.49E-01 | 3                  | 6.49E-01 | 2                  | 1.91E-01 | 2                  | 1.91E-01 |
| EPB41L4A | 5   | 5                  | 5.14E-01 | 6                  | 5.13E-01 | 5                  | 2.26E-01 | 6                  | 2.26E-01 | 4                  | 1.91E-01 | 5                  | 1.91E-01 |
| SMIM24   | 19  | 1                  | 5.23E-01 | 1                  | 5.23E-01 | 1                  | 2.11E-01 | 1                  | 2.11E-01 | 1                  | 1.91E-01 | 1                  | 1.91E-01 |

| SetID    | Chr | ADEH- vs NA        |          |                    |          | ADEH+ vs ADEH-     |          |                    |          | ADEH+ vs NA        |          |                    |          |
|----------|-----|--------------------|----------|--------------------|----------|--------------------|----------|--------------------|----------|--------------------|----------|--------------------|----------|
|          |     | rarenovel          |          | all                |          | rarenovel          |          | all                |          | rarenovel          |          | all                |          |
|          |     | N variants in test | p-value  | N variants in test | p-value  | N variants in test | p-value  | N variants in test | p-value  | N variants in test | p-value  | N variants in test | p-value  |
| PRSS8    | 16  | 1                  | 2.07E-01 | 1                  | 2.07E-01 | 1                  | 2.90E-01 | 1                  | 2.90E-01 | 1                  | 1.91E-01 | 1                  | 1.91E-01 |
| DNMT3A   | 2   | 1                  | 5.36E-03 | 1                  | 5.36E-03 | 1                  | 4.40E-01 | 1                  | 4.40E-01 | 1                  | 1.91E-01 | 1                  | 1.91E-01 |
| P3H1     | 1   | 4                  | 5.26E-01 | 4                  | 5.26E-01 | 3                  | 2.77E-01 | 3                  | 2.77E-01 | 3                  | 1.91E-01 | 3                  | 1.91E-01 |
| CEP164   | 11  | 4                  | 1.83E-02 | 4                  | 1.83E-02 | 3                  | 3.24E-01 | 3                  | 3.24E-01 | 2                  | 1.91E-01 | 2                  | 1.91E-01 |
| CHIA     | 1   | 1                  | 7.57E-01 | 3                  | 4.80E-01 | 1                  | 5.35E-01 | 3                  | 5.39E-01 |                    |          | 2                  | 1.91E-01 |
| MYOCD    | 17  | 3                  | 1.18E-01 | 3                  | 1.18E-01 | 3                  | 1.91E-01 | 3                  | 1.91E-01 | 1                  | 2.58E-01 | 1                  | 2.58E-01 |
| ZNF366   | 5   | 2                  | 2.07E-01 | 2                  | 2.07E-01 | 2                  | 1.91E-01 | 2                  | 1.91E-01 | 1                  | 1.00E+00 | 1                  | 1.00E+00 |
| FAM188B  | 7   | 2                  | 3.07E-02 | 2                  | 3.07E-02 | 2                  | 7.07E-01 | 2                  | 7.07E-01 | 1                  | 1.91E-01 | 1                  | 1.91E-01 |
| FUT2     | 19  | 5                  | 1.99E-01 | 6                  | 1.99E-01 | 4                  | 2.66E-01 | 5                  | 2.66E-01 | 3                  | 1.92E-01 | 4                  | 1.92E-01 |
| CRAMP1   | 16  | 3                  | 1.69E-01 | 3                  | 1.69E-01 | 1                  | 1.92E-01 | 1                  | 1.92E-01 | 3                  | 3.86E-01 | 3                  | 3.86E-01 |
| NIF3L1   | 2   | 2                  | 1.00E+00 | 2                  | 1.00E+00 | 2                  | 1.92E-01 | 2                  | 1.92E-01 | 2                  | 4.54E-01 | 2                  | 4.54E-01 |
| MYO5C    | 15  | 6                  | 4.98E-01 | 6                  | 4.98E-01 | 5                  | 3.94E-01 | 5                  | 3.94E-01 | 3                  | 1.92E-01 | 3                  | 1.92E-01 |
| LRRC10   | 12  | 3                  | 8.04E-01 | 3                  | 8.04E-01 | 2                  | 2.22E-01 | 2                  | 2.22E-01 | 2                  | 1.92E-01 | 2                  | 1.92E-01 |
| ADAMTSL5 | 19  | 3                  | 6.36E-01 | 3                  | 6.36E-01 | 3                  | 1.92E-01 | 3                  | 1.92E-01 | 2                  | 3.01E-01 | 2                  | 3.01E-01 |
| RPS6KC1  | 1   | 3                  | 2.02E-01 | 3                  | 2.02E-01 | 1                  | 1.92E-01 | 1                  | 1.92E-01 | 3                  | 3.74E-01 | 3                  | 3.74E-01 |
| COL24A1  | 1   | 7                  | 2.85E-02 | 7                  | 2.85E-02 | 6                  | 1.92E-01 | 6                  | 1.92E-01 | 2                  | 4.29E-01 | 2                  | 4.29E-01 |
| ZNF599   | 19  | 5                  | 1.32E-01 | 5                  | 1.32E-01 | 5                  | 2.35E-01 | 5                  | 2.35E-01 | 2                  | 1.92E-01 | 2                  | 1.92E-01 |
| DNAJC10  | 2   | 4                  | 4.48E-01 | 4                  | 4.48E-01 | 4                  | 1.92E-01 | 4                  | 1.92E-01 | 2                  | 6.22E-01 | 2                  | 6.22E-01 |
| LGR4     | 11  | 9                  | 2.26E-01 | 9                  | 2.26E-01 | 7                  | 3.53E-01 | 7                  | 3.53E-01 | 6                  | 1.92E-01 | 6                  | 1.92E-01 |
| TRPM4    | 19  | 8                  | 5.18E-01 | 8                  | 5.18E-01 | 7                  | 1.93E-01 | 7                  | 1.93E-01 | 4                  | 2.66E-01 | 4                  | 2.66E-01 |
| ARMC9    | 2   | 4                  | 3.80E-01 | 4                  | 3.80E-01 | 3                  | 1.93E-01 | 3                  | 1.93E-01 | 3                  | 3.32E-01 | 3                  | 3.32E-01 |
| OMP      | 11  | 1                  | 7.49E-01 | 2                  | 2.04E-01 | 1                  | 4.87E-01 | 2                  | 7.27E-01 |                    |          | 1                  | 1.93E-01 |
| NCEH1    | 3   | 2                  | 5.06E-01 | 2                  | 5.06E-01 | 2                  | 1.93E-01 | 2                  | 1.93E-01 | 1                  | 2.52E-01 | 1                  | 2.52E-01 |
| CFHR4    | 1   | 3                  | 1.00E+00 | 3                  | 1.00E+00 | 3                  | 1.93E-01 | 3                  | 1.93E-01 | 1                  | 1.99E-01 | 1                  | 1.99E-01 |
| MYCT1    | 6   | 3                  | 7.57E-01 | 3                  | 7.57E-01 | 3                  | 1.93E-01 | 3                  | 1.93E-01 | 2                  | 3.93E-01 | 2                  | 3.93E-01 |
| EIF2AK3  | 2   | 2                  | 2.57E-01 | 2                  | 2.57E-01 | 2                  | 1.00E+00 | 2                  | 1.00E+00 | 1                  | 1.94E-01 | 1                  | 1.94E-01 |
| PNRC1    | 6   | 3                  | 3.91E-01 | 3                  | 3.91E-01 | 2                  | 2.54E-01 | 2                  | 2.54E-01 | 2                  | 1.94E-01 | 2                  | 1.94E-01 |
| LDHAL6A  | 11  | 2                  | 8.96E-01 | 2                  | 8.96E-01 | 2                  | 2.70E-01 | 2                  | 2.70E-01 | 1                  | 1.94E-01 | 1                  | 1.94E-01 |
| CFAP97   | 4   | 2                  | 3.37E-02 | 2                  | 3.37E-02 | 2                  | 5.66E-01 | 2                  | 5.66E-01 | 1                  | 1.94E-01 | 1                  | 1.94E-01 |
| ADIPOQ   | 3   | 4                  | 3.15E-01 | 4                  | 3.15E-01 | 3                  | 1.94E-01 | 3                  | 1.94E-01 | 4                  | 3.83E-01 | 4                  | 3.83E-01 |
| KIFC2    | 8   | 2                  | 7.88E-01 | 2                  | 7.88E-01 | 1                  | 1.94E-01 | 1                  | 1.94E-01 | 2                  | 2.43E-01 | 2                  | 2.43E-01 |
| CYBRD1   | 2   | 1                  | 2.14E-01 | 1                  | 2.14E-01 | 1                  | 1.94E-01 | 1                  | 1.94E-01 | 1                  | 4.45E-01 | 1                  | 4.45E-01 |
| DBR1     | 3   | 4                  | 3.29E-02 | 4                  | 3.29E-02 | 3                  | 1.94E-01 | 3                  | 1.94E-01 | 2                  | 6.35E-01 | 2                  | 6.35E-01 |
| BDP1     | 5   | 6                  | 4.49E-01 | 7                  | 2.84E-01 | 4                  | 3.86E-01 | 5                  | 2.71E-01 | 4                  | 3.28E-01 | 5                  | 1.95E-01 |
| ROBO3    | 11  | 8                  | 4.50E-01 | 8                  | 4.50E-01 | 7                  | 1.95E-01 | 7                  | 1.95E-01 | 3                  | 3.62E-01 | 3                  | 3.62E-01 |
| ARGFX    | 3   | 1                  | 1.77E-01 | 1                  | 1.77E-01 | 1                  | 3.23E-01 | 1                  | 3.23E-01 | 1                  | 1.95E-01 | 1                  | 1.95E-01 |
| IQGAP2   | 5   | 6                  | 6.01E-01 | 6                  | 6.01E-01 | 6                  | 2.84E-01 | 6                  | 2.84E-01 | 5                  | 1.95E-01 | 5                  | 1.95E-01 |
| AKR7A3   | 1   | 1                  | 3.03E-01 | 1                  | 3.03E-01 | 1                  | 1.00E+00 | 1                  | 1.00E+00 | 1                  | 1.95E-01 | 1                  | 1.95E-01 |
| ABCA3    | 16  | 5                  | 5.08E-01 | 5                  | 5.08E-01 | 6                  | 4.54E-01 | 6                  | 4.54E-01 | 3                  | 1.95E-01 | 3                  | 1.95E-01 |
| WASF3    | 13  | 3                  | 1.40E-01 | 3                  | 1.40E-01 | 3                  | 1.95E-01 | 3                  | 1.95E-01 | 1                  | 2.87E-01 | 1                  | 2.87E-01 |
| C7orf34  | 7   | 2                  | 7.23E-01 | 2                  | 7.23E-01 | 1                  | 1.95E-01 | 1                  | 1.95E-01 | 2                  | 5.48E-01 | 2                  | 5.48E-01 |
| TAS2R9   | 12  | 1                  | 5.80E-01 | 1                  | 5.80E-01 | 1                  | 1.96E-01 | 1                  | 1.96E-01 | 1                  | 2.68E-01 | 1                  | 2.68E-01 |
| KATNB1   | 16  | 3                  | 2.27E-01 | 3                  | 2.27E-01 | 2                  | 1.96E-01 | 2                  | 1.96E-01 | 2                  | 1.00E+00 | 2                  | 1.00E+00 |
| MYO1C    | 17  | 9                  | 7.57E-01 | 9                  | 7.57E-01 | 10                 | 2.81E-01 | 10                 | 2.81E-01 | 5                  | 1.96E-01 | 5                  | 1.96E-01 |
| CLK3     | 15  |                    |          | 1                  | 8.05E-01 |                    |          | 1                  | 1.96E-01 |                    |          | 1                  | 2.24E-01 |
| TAPBPL   | 12  | 3                  | 1.71E-01 | 3                  | 1.71E-01 | 2                  | 1.96E-01 | 2                  | 1.96E-01 | 2                  | 1.00E+00 | 2                  | 1.00E+00 |
| CLC      | 19  | 1                  | 6.16E-01 | 1                  | 6.16E-01 | 1                  | 4.20E-01 | 1                  | 4.20E-01 | 1                  | 1.97E-01 | 1                  | 1.97E-01 |
| CDH23    | 10  | 7                  | 6.82E-01 | 8                  | 6.82E-01 | 8                  | 5.00E-01 | 9                  | 5.00E-01 | 2                  | 1.97E-01 | 3                  | 1.97E-01 |

| SetID    | Chr | ADEH- vs NA        |          |                    |          | ADEH+ vs ADEH-     |          |                    |          | ADEH+ vs NA        |          |                    |          |
|----------|-----|--------------------|----------|--------------------|----------|--------------------|----------|--------------------|----------|--------------------|----------|--------------------|----------|
|          |     | rarenovel          |          | all                |          | rarenovel          |          | all                |          | rarenovel          |          | all                |          |
|          |     | N variants in test | p-value  | N variants in test | p-value  | N variants in test | p-value  | N variants in test | p-value  | N variants in test | p-value  | N variants in test | p-value  |
| ARRDC2   | 19  | 3                  | 7.77E-01 | 3                  | 7.77E-01 | 3                  | 1.97E-01 | 3                  | 1.97E-01 | 3                  | 3.85E-01 | 3                  | 3.85E-01 |
| TSNARE1  | 8   | 2                  | 1.00E+00 | 2                  | 1.00E+00 | 2                  | 2.45E-01 | 2                  | 2.45E-01 | 1                  | 1.97E-01 | 1                  | 1.97E-01 |
| RSPH1    | 21  | 1                  | 8.28E-01 | 1                  | 8.28E-01 | 1                  | 1.97E-01 | 1                  | 1.97E-01 | 1                  | 2.89E-01 | 1                  | 2.89E-01 |
| NKAPL    | 6   | 2                  | 7.19E-02 | 2                  | 7.19E-02 | 1                  | 4.39E-01 | 1                  | 4.39E-01 | 2                  | 1.97E-01 | 2                  | 1.97E-01 |
| COL5A2   | 2   | 8                  | 4.99E-01 | 8                  | 4.99E-01 | 4                  | 1.97E-01 | 4                  | 1.97E-01 | 6                  | 2.61E-01 | 6                  | 2.61E-01 |
| DIEXF    | 1   | 4                  | 2.24E-01 | 4                  | 2.24E-01 | 2                  | 1.97E-01 | 2                  | 1.97E-01 | 3                  | 2.76E-01 | 3                  | 2.76E-01 |
| DENND2C  | 1   | 7                  | 2.11E-01 | 7                  | 2.11E-01 | 6                  | 3.09E-01 | 6                  | 3.09E-01 | 3                  | 1.97E-01 | 3                  | 1.97E-01 |
| CYB561D2 | 3   | 1                  | 5.69E-01 | 1                  | 5.69E-01 | 1                  | 1.97E-01 | 1                  | 1.97E-01 | 1                  | 3.19E-01 | 1                  | 3.19E-01 |
| COL5A3   | 19  | 7                  | 3.56E-01 | 8                  | 3.56E-01 | 5                  | 2.40E-01 | 6                  | 2.42E-01 | 3                  | 1.97E-01 | 4                  | 1.98E-01 |
| RIF1     | 2   | 6                  | 2.44E-01 | 6                  | 2.44E-01 | 4                  | 1.98E-01 | 4                  | 1.98E-01 | 3                  | 4.83E-01 | 3                  | 4.83E-01 |
| CCDC107  | 9   | 2                  | 1.00E+00 | 3                  | 1.00E+00 | 2                  | 1.98E-01 | 3                  | 2.00E-01 | 1                  | 2.21E-01 | 2                  | 2.17E-01 |
| RELT     | 11  | 3                  | 7.22E-01 | 3                  | 7.22E-01 | 3                  | 2.74E-01 | 3                  | 2.74E-01 | 2                  | 1.98E-01 | 2                  | 1.98E-01 |
| GRAMD2   | 15  | 3                  | 8.00E-01 | 3                  | 8.00E-01 | 4                  | 2.25E-01 | 4                  | 2.25E-01 | 2                  | 1.98E-01 | 2                  | 1.98E-01 |
| TLR1     | 4   | 3                  | 6.71E-02 | 3                  | 6.71E-02 | 3                  | 4.19E-01 | 3                  | 4.19E-01 | 1                  | 1.98E-01 | 1                  | 1.98E-01 |
| ATP10A   | 15  | 11                 | 7.80E-01 | 12                 | 2.47E-01 | 10                 | 1.98E-01 | 11                 | 4.19E-01 | 4                  | 2.44E-01 | 5                  | 2.06E-01 |
| ZNF493   | 19  | 2                  | 1.59E-01 | 3                  | 1.59E-01 | 2                  | 1.00E+00 | 3                  | 1.00E+00 | 1                  | 1.98E-01 | 2                  | 1.98E-01 |
| SLC15A3  | 11  | 5                  | 5.35E-01 | 5                  | 5.35E-01 | 4                  | 1.98E-01 | 4                  | 1.98E-01 | 2                  | 4.55E-01 | 2                  | 4.55E-01 |
| C2orf74  | 2   | 1                  | 7.56E-01 | 2                  | 7.55E-01 | 1                  | 5.07E-01 | 2                  | 5.07E-01 |                    |          | 1                  | 1.98E-01 |
| NSFL1C   | 20  | 3                  | 3.87E-01 | 3                  | 3.87E-01 | 3                  | 1.99E-01 | 3                  | 1.99E-01 | 1                  | 3.53E-01 | 1                  | 3.53E-01 |
| ZNF541   | 19  | 7                  | 3.93E-01 | 8                  | 4.00E-01 | 5                  | 2.04E-01 | 6                  | 1.99E-01 | 3                  | 3.48E-01 | 4                  | 3.51E-01 |
| C1orf204 | 1   | 2                  | 6.28E-01 | 2                  | 6.28E-01 | 2                  | 3.10E-01 | 2                  | 3.10E-01 | 1                  | 1.99E-01 | 1                  | 1.99E-01 |
| AMDHD2   | 16  | 2                  | 8.03E-01 | 2                  | 8.03E-01 | 1                  | 1.99E-01 | 1                  | 1.99E-01 | 2                  | 2.94E-01 | 2                  | 2.94E-01 |
| CEMP1    | 16  | 1                  | 1.00E+00 | 1                  | 1.00E+00 | 1                  | 1.99E-01 | 1                  | 1.99E-01 | 1                  | 2.45E-01 | 1                  | 2.45E-01 |
| FIBCD1   | 9   | 3                  | 1.07E-02 | 3                  | 1.07E-02 | 2                  | 4.95E-01 | 2                  | 4.95E-01 | 2                  | 1.99E-01 | 2                  | 1.99E-01 |
| COL16A1  | 1   | 3                  | 8.41E-01 | 3                  | 8.41E-01 | 3                  | 1.99E-01 | 3                  | 1.99E-01 | 3                  | 3.02E-01 | 3                  | 3.02E-01 |
| NOTCH3   | 19  | 7                  | 5.15E-01 | 7                  | 5.15E-01 | 6                  | 1.99E-01 | 6                  | 1.99E-01 | 5                  | 3.80E-01 | 5                  | 3.80E-01 |
| PCDHA1   | 5   | 7                  | 8.18E-01 | 7                  | 8.18E-01 | 6                  | 1.99E-01 | 6                  | 1.99E-01 | 4                  | 3.15E-01 | 4                  | 3.15E-01 |
| RRP36    | 6   | 2                  | 1.45E-01 | 2                  | 1.45E-01 | 2                  | 1.00E+00 | 2                  | 1.00E+00 | 1                  | 1.99E-01 | 1                  | 1.99E-01 |
| WDR55    | 5   | 1                  | 7.45E-01 | 3                  | 3.44E-01 | 1                  | 4.41E-01 | 3                  | 6.44E-01 |                    |          | 2                  | 1.99E-01 |
| STK11IP  | 2   | 8                  | 3.61E-01 | 8                  | 3.61E-01 | 7                  | 5.48E-01 | 7                  | 5.48E-01 | 4                  | 1.99E-01 | 4                  | 1.99E-01 |
| PCNXL3   | 11  | 5                  | 2.33E-01 | 6                  | 2.33E-01 | 4                  | 3.47E-01 | 5                  | 3.47E-01 | 3                  | 2.00E-01 | 4                  | 2.00E-01 |
| LAD1     | 1   | 2                  | 7.22E-01 | 2                  | 7.22E-01 | 2                  | 2.00E-01 | 2                  | 2.00E-01 | 2                  | 2.07E-01 | 2                  | 2.07E-01 |
| OR5D13   | 11  | 1                  | 4.91E-01 | 1                  | 4.91E-01 | 1                  | 2.00E-01 | 1                  | 2.00E-01 | 1                  | 2.71E-01 | 1                  | 2.71E-01 |
| TJP1     | 15  | 8                  | 4.89E-02 | 8                  | 4.89E-02 | 7                  | 2.35E-01 | 7                  | 2.35E-01 | 3                  | 2.00E-01 | 3                  | 2.00E-01 |
| KLRF1    | 12  |                    |          | 1                  | 7.34E-01 |                    |          | 1                  | 2.00E-01 |                    |          | 1                  | 2.58E-01 |
| MS4A5    | 11  |                    |          | 1                  | 2.11E-01 |                    |          | 1                  | 2.00E-01 |                    |          | 1                  | 5.20E-01 |
| ADAMTSL1 | 9   | 4                  | 3.56E-01 | 4                  | 3.56E-01 | 2                  | 2.00E-01 | 2                  | 2.00E-01 | 3                  | 2.79E-01 | 3                  | 2.79E-01 |
| PCDH12   | 5   | 4                  | 2.81E-01 | 4                  | 2.81E-01 | 3                  | 2.31E-01 | 3                  | 2.31E-01 | 3                  | 2.00E-01 | 3                  | 2.00E-01 |
| PDGFRL   | 8   | 4                  | 8.10E-01 | 4                  | 8.10E-01 | 5                  | 2.38E-01 | 5                  | 2.38E-01 | 3                  | 2.00E-01 | 3                  | 2.00E-01 |
| LGR6     | 1   | 4                  | 8.56E-01 | 4                  | 8.56E-01 | 4                  | 2.01E-01 | 4                  | 2.01E-01 | 3                  | 3.09E-01 | 3                  | 3.09E-01 |
| OR13D1   | 9   | 3                  | 2.05E-01 | 3                  | 2.05E-01 | 2                  | 2.01E-01 | 2                  | 2.01E-01 | 2                  | 6.37E-01 | 2                  | 6.37E-01 |
| SNTA1    | 20  | 2                  | 3.85E-01 | 2                  | 3.85E-01 | 2                  | 2.01E-01 | 2                  | 2.01E-01 | 1                  | 3.62E-01 | 1                  | 3.62E-01 |
| S100A3   | 1   | 1                  | 2.83E-01 | 1                  | 2.83E-01 | 1                  | 2.44E-01 | 1                  | 2.44E-01 | 1                  | 2.01E-01 | 1                  | 2.01E-01 |
| LTN1     | 21  | 1                  | 1.79E-01 | 2                  | 1.86E-01 | 1                  | 2.18E-01 | 2                  | 2.01E-01 | 1                  | 6.12E-01 | 2                  | 6.18E-01 |
| ABHD14A  | 3   | 1                  | 8.07E-02 | 2                  | 2.56E-02 |                    |          | 1                  | 2.01E-01 | 1                  | 6.13E-01 | 2                  | 1.00E+00 |
| SYNGR4   | 19  | 2                  | 5.69E-01 | 3                  | 1.12E-01 | 2                  | 6.25E-01 | 3                  | 2.01E-01 |                    |          | 1                  | 4.94E-01 |
| WWOX     | 16  | 3                  | 8.46E-01 | 3                  | 8.46E-01 | 3                  | 2.96E-01 | 3                  | 2.96E-01 | 1                  | 2.01E-01 | 1                  | 2.01E-01 |
| ACAP3    | 1   | 2                  | 7.32E-01 | 2                  | 7.32E-01 | 1                  | 2.01E-01 | 1                  | 2.01E-01 | 2                  | 3.18E-01 | 2                  | 3.18E-01 |

| SetID    | Chr | ADEH- vs NA        |          |                    |          | ADEH+ vs ADEH-     |          |                    |          | ADEH+ vs NA        |          |                    |          |
|----------|-----|--------------------|----------|--------------------|----------|--------------------|----------|--------------------|----------|--------------------|----------|--------------------|----------|
|          |     | rarenovel          |          | all                |          | rarenovel          |          | all                |          | rarenovel          |          | all                |          |
|          |     | N variants in test | p-value  | N variants in test | p-value  | N variants in test | p-value  | N variants in test | p-value  | N variants in test | p-value  | N variants in test | p-value  |
| KIAA1147 | 7   | 2                  | 5.31E-01 | 2                  | 5.31E-01 | 3                  | 2.01E-01 | 3                  | 2.01E-01 | 3                  | 3.03E-01 | 3                  | 3.03E-01 |
| HSD17B13 | 4   | 3                  | 4.43E-01 | 4                  | 3.11E-01 | 2                  | 2.02E-01 | 3                  | 3.22E-01 | 2                  | 5.58E-01 | 3                  | 6.26E-01 |
| RYR1     | 19  | 25                 | 7.77E-01 | 25                 | 7.77E-01 | 16                 | 2.26E-01 | 16                 | 2.26E-01 | 13                 | 2.02E-01 | 13                 | 2.02E-01 |
| NAT10    | 11  | 2                  | 7.76E-01 | 2                  | 7.76E-01 | 3                  | 2.29E-01 | 3                  | 2.29E-01 | 2                  | 2.02E-01 | 2                  | 2.02E-01 |
| TSPAN8   | 12  |                    |          | 1                  | 8.06E-01 |                    |          | 1                  | 2.02E-01 |                    |          | 1                  | 2.42E-01 |
| CHD1L    | 1   | 4                  | 3.14E-01 | 5                  | 3.88E-01 | 4                  | 2.64E-01 | 5                  | 2.02E-01 | 3                  | 3.22E-01 | 4                  | 3.41E-01 |
| SLC25A47 | 14  | 3                  | 4.24E-01 | 3                  | 4.24E-01 | 3                  | 2.75E-01 | 3                  | 2.75E-01 | 3                  | 2.03E-01 | 3                  | 2.03E-01 |
| POLE     | 12  | 9                  | 6.94E-01 | 9                  | 6.94E-01 | 9                  | 3.78E-01 | 9                  | 3.78E-01 | 3                  | 2.03E-01 | 3                  | 2.03E-01 |
| NPBWR1   | 8   | 3                  | 1.57E-01 | 4                  | 1.77E-01 | 3                  | 4.84E-01 | 4                  | 3.40E-01 |                    |          | 1                  | 2.03E-01 |
| WDR33    | 2   | 3                  | 1.71E-01 | 3                  | 1.71E-01 | 2                  | 2.03E-01 | 2                  | 2.03E-01 | 2                  | 6.34E-01 | 2                  | 6.34E-01 |
| B4GALT5  | 20  | 1                  | 4.04E-01 | 1                  | 4.04E-01 | 1                  | 3.77E-01 | 1                  | 3.77E-01 | 1                  | 2.03E-01 | 1                  | 2.03E-01 |
| C12orf54 | 12  | 2                  | 4.15E-01 | 3                  | 4.13E-01 | 1                  | 5.23E-01 | 2                  | 3.23E-01 | 1                  | 6.36E-01 | 2                  | 2.03E-01 |
| DOCK10   | 2   | 13                 | 9.77E-02 | 13                 | 9.77E-02 | 7                  | 3.52E-01 | 7                  | 3.52E-01 | 7                  | 2.03E-01 | 7                  | 2.03E-01 |
| ANKRD27  | 19  | 7                  | 1.00E+00 | 7                  | 1.00E+00 | 7                  | 2.76E-01 | 7                  | 2.76E-01 | 3                  | 2.03E-01 | 3                  | 2.03E-01 |
| PLIN1    | 15  | 4                  | 1.00E+00 | 4                  | 1.00E+00 | 4                  | 2.03E-01 | 4                  | 2.03E-01 | 4                  | 2.14E-01 | 4                  | 2.14E-01 |
| ULBP3    | 6   | 2                  | 1.80E-01 | 2                  | 1.80E-01 | 2                  | 2.03E-01 | 2                  | 2.03E-01 | 1                  | 2.35E-01 | 1                  | 2.35E-01 |
| CRISP3   | 6   | 2                  | 7.00E-01 | 2                  | 7.00E-01 | 2                  | 2.04E-01 | 2                  | 2.04E-01 | 1                  | 3.05E-01 | 1                  | 3.05E-01 |
| CEBPE    | 14  | 1                  | 3.43E-01 | 1                  | 3.43E-01 | 1                  | 2.04E-01 | 1                  | 2.04E-01 | 1                  | 1.00E+00 | 1                  | 1.00E+00 |
| PLA2G15  | 16  | 4                  | 5.11E-01 | 4                  | 5.11E-01 | 4                  | 2.04E-01 | 4                  | 2.04E-01 | 1                  | 4.50E-01 | 1                  | 4.50E-01 |
| KLC4     | 6   | 3                  | 8.16E-01 | 3                  | 8.16E-01 | 3                  | 2.04E-01 | 3                  | 2.04E-01 | 3                  | 3.57E-01 | 3                  | 3.57E-01 |
| FOXH1    | 8   | 2                  | 7.00E-01 | 2                  | 7.00E-01 | 2                  | 2.07E-01 | 2                  | 2.07E-01 | 2                  | 2.04E-01 | 2                  | 2.04E-01 |
| RPGRIP1  | 14  | 5                  | 6.79E-02 | 5                  | 6.79E-02 | 4                  | 2.04E-01 | 4                  | 2.04E-01 | 3                  | 3.77E-01 | 3                  | 3.77E-01 |
| SHF      | 15  | 4                  | 7.58E-01 | 4                  | 7.58E-01 | 4                  | 3.21E-01 | 4                  | 3.21E-01 | 1                  | 2.04E-01 | 1                  | 2.04E-01 |
| SLC9A3R2 | 16  | 4                  | 1.94E-01 | 4                  | 1.94E-01 | 3                  | 2.05E-01 | 3                  | 2.05E-01 | 3                  | 4.76E-01 | 3                  | 4.76E-01 |
| SLX4     | 16  | 4                  | 2.53E-01 | 6                  | 3.07E-01 | 4                  | 2.45E-01 | 6                  | 3.52E-01 | 2                  | 2.05E-01 | 4                  | 5.53E-01 |
| CLASP2   | 3   | 3                  | 2.93E-01 | 4                  | 3.19E-01 | 1                  | 2.28E-01 | 2                  | 2.05E-01 | 3                  | 2.17E-01 | 4                  | 2.29E-01 |
| PIK3C2G  | 12  | 8                  | 6.19E-01 | 9                  | 6.37E-01 | 9                  | 2.15E-01 | 10                 | 2.15E-01 | 6                  | 2.05E-01 | 7                  | 2.05E-01 |
| SEC23B   | 20  | 7                  | 8.04E-01 | 7                  | 8.04E-01 | 5                  | 2.05E-01 | 5                  | 2.05E-01 | 3                  | 2.85E-01 | 3                  | 2.85E-01 |
| ASB6     | 9   | 1                  | 6.98E-01 | 1                  | 6.98E-01 | 1                  | 2.05E-01 | 1                  | 2.05E-01 | 1                  | 2.09E-01 | 1                  | 2.09E-01 |
| SFI1     | 22  | 11                 | 1.00E+00 | 12                 | 8.65E-01 | 10                 | 3.04E-01 | 11                 | 3.43E-01 | 6                  | 2.05E-01 | 7                  | 2.58E-01 |
| LRRC32   | 11  | 2                  | 7.28E-01 | 2                  | 7.28E-01 | 2                  | 2.05E-01 | 2                  | 2.05E-01 | 1                  | 5.16E-01 | 1                  | 5.16E-01 |
| FCRL1    | 1   | 3                  | 6.64E-01 | 3                  | 6.64E-01 | 3                  | 2.05E-01 | 3                  | 2.05E-01 | 1                  | 3.03E-01 | 1                  | 3.03E-01 |
| ZC2HC1A  | 8   | 2                  | 8.53E-01 | 2                  | 8.53E-01 | 2                  | 2.22E-01 | 2                  | 2.22E-01 | 1                  | 2.06E-01 | 1                  | 2.06E-01 |
| KAT6B    | 10  | 10                 | 3.34E-01 | 10                 | 3.34E-01 | 6                  | 3.12E-01 | 6                  | 3.12E-01 | 5                  | 2.06E-01 | 5                  | 2.06E-01 |
| DACT2    | 6   | 4                  | 3.40E-02 | 4                  | 3.40E-02 | 4                  | 3.62E-01 | 4                  | 3.62E-01 | 1                  | 2.06E-01 | 1                  | 2.06E-01 |
| ESPL1    | 12  | 1                  | 7.46E-01 | 1                  | 7.46E-01 | 1                  | 2.11E-01 | 1                  | 2.11E-01 | 1                  | 2.06E-01 | 1                  | 2.06E-01 |
| UCP1     | 4   | 2                  | 1.76E-01 | 2                  | 1.76E-01 | 1                  | 2.06E-01 | 1                  | 2.06E-01 | 2                  | 1.00E+00 | 2                  | 1.00E+00 |
| MYO1A    | 12  | 5                  | 5.40E-01 | 5                  | 5.40E-01 | 4                  | 2.06E-01 | 4                  | 2.06E-01 | 3                  | 3.45E-01 | 3                  | 3.45E-01 |
| LXN      | 3   | 1                  | 4.10E-01 | 1                  | 4.10E-01 | 1                  | 4.06E-01 | 1                  | 4.06E-01 | 1                  | 2.06E-01 | 1                  | 2.06E-01 |
| FZD9     | 7   | 1                  | 5.21E-01 | 1                  | 5.21E-01 | 1                  | 2.06E-01 | 1                  | 2.06E-01 | 1                  | 3.16E-01 | 1                  | 3.16E-01 |
| PUS7L    | 12  | 5                  | 1.05E-01 | 5                  | 1.05E-01 | 5                  | 2.06E-01 | 5                  | 2.06E-01 | 2                  | 6.20E-01 | 2                  | 6.20E-01 |
| CROCC    | 1   | 9                  | 3.05E-01 | 9                  | 3.05E-01 | 9                  | 7.82E-01 | 9                  | 7.82E-01 | 2                  | 2.07E-01 | 2                  | 2.07E-01 |
| RNF43    | 17  | 2                  | 5.67E-01 | 5                  | 3.66E-01 | 2                  | 5.94E-01 | 5                  | 7.18E-01 |                    |          | 3                  | 2.07E-01 |
| NROB2    | 1   |                    |          | 1                  | 4.33E-01 |                    |          | 1                  | 2.07E-01 |                    |          | 1                  | 3.10E-01 |
| BBS1     | 11  | 3                  | 6.06E-01 | 3                  | 6.06E-01 | 3                  | 4.16E-01 | 3                  | 4.16E-01 | 2                  | 2.07E-01 | 2                  | 2.07E-01 |
| SGCZ     | 8   | 3                  | 1.59E-01 | 3                  | 1.59E-01 | 1                  | 2.07E-01 | 1                  | 2.07E-01 | 3                  | 2.86E-01 | 3                  | 2.86E-01 |
| RREB1    | 6   | 9                  | 1.00E+00 | 10                 | 1.00E+00 | 8                  | 2.07E-01 | 9                  | 2.15E-01 | 7                  | 2.20E-01 | 8                  | 2.29E-01 |
| TMCO5A   | 15  | 2                  | 7.62E-03 | 2                  | 7.62E-03 | 2                  | 5.93E-01 | 2                  | 5.93E-01 | 1                  | 2.07E-01 | 1                  | 2.07E-01 |

| SetID       | Chr | ADEH- vs NA        |          |                    |          | ADEH+ vs ADEH-     |          |                    |          | ADEH+ vs NA        |          |                    |          |
|-------------|-----|--------------------|----------|--------------------|----------|--------------------|----------|--------------------|----------|--------------------|----------|--------------------|----------|
|             |     | rarenovel          |          | all                |          | rarenovel          |          | all                |          | rarenovel          |          | all                |          |
|             |     | N variants in test | p-value  | N variants in test | p-value  | N variants in test | p-value  | N variants in test | p-value  | N variants in test | p-value  | N variants in test | p-value  |
| CD248       | 11  | 5                  | 8.22E-01 | 5                  | 8.22E-01 | 5                  | 2.07E-01 | 5                  | 2.07E-01 | 2                  | 2.39E-01 | 2                  | 2.39E-01 |
| EXOC1       | 4   | 2                  | 1.63E-01 | 2                  | 1.63E-01 | 1                  | 2.07E-01 | 1                  | 2.07E-01 | 2                  | 4.66E-01 | 2                  | 4.66E-01 |
| COL6A6      | 3   | 13                 | 2.24E-01 | 14                 | 2.24E-01 | 12                 | 2.08E-01 | 13                 | 2.08E-01 | 7                  | 6.05E-01 | 8                  | 6.32E-01 |
| MAPKBP1     | 15  | 4                  | 9.92E-02 | 4                  | 9.92E-02 | 4                  | 2.08E-01 | 4                  | 2.08E-01 | 3                  | 2.51E-01 | 3                  | 2.51E-01 |
| CDHR5       | 11  | 2                  | 2.00E-01 | 2                  | 2.00E-01 | 2                  | 2.08E-01 | 2                  | 2.08E-01 | 1                  | 3.41E-01 | 1                  | 3.41E-01 |
| PRDM2       | 1   | 6                  | 9.37E-02 | 6                  | 9.37E-02 | 4                  | 2.08E-01 | 4                  | 2.08E-01 | 5                  | 5.16E-01 | 5                  | 5.16E-01 |
| MCEMP1      | 19  | 1                  | 4.15E-01 | 1                  | 4.15E-01 | 1                  | 2.39E-01 | 1                  | 2.39E-01 | 1                  | 2.09E-01 | 1                  | 2.09E-01 |
| NUP210L     | 1   | 4                  | 8.91E-01 | 4                  | 8.91E-01 | 4                  | 2.09E-01 | 4                  | 2.09E-01 | 3                  | 3.11E-01 | 3                  | 3.11E-01 |
| MKKS        | 20  | 1                  | 6.63E-01 | 1                  | 6.63E-01 | 1                  | 2.46E-01 | 1                  | 2.46E-01 | 1                  | 2.09E-01 | 1                  | 2.09E-01 |
| ASXL3       | 18  | 7                  | 1.11E-01 | 7                  | 1.11E-01 | 6                  | 2.09E-01 | 6                  | 2.09E-01 | 2                  | 4.76E-01 | 2                  | 4.76E-01 |
| PRR3        | 6   | 2                  | 5.78E-01 | 2                  | 5.78E-01 | 2                  | 2.09E-01 | 2                  | 2.09E-01 | 2                  | 6.72E-01 | 2                  | 6.72E-01 |
| MFSD9       | 2   | 5                  | 3.78E-01 | 5                  | 3.78E-01 | 5                  | 3.37E-01 | 5                  | 3.37E-01 | 2                  | 2.09E-01 | 2                  | 2.09E-01 |
| PKD2L2      | 5   | 5                  | 4.44E-01 | 5                  | 4.44E-01 | 3                  | 2.09E-01 | 3                  | 2.09E-01 | 3                  | 2.96E-01 | 3                  | 2.96E-01 |
| CTSF        | 11  | 4                  | 2.02E-01 | 4                  | 2.02E-01 | 3                  | 2.10E-01 | 3                  | 2.10E-01 | 3                  | 1.00E+00 | 3                  | 1.00E+00 |
| ZBTB20      | 3   | 1                  | 2.71E-02 | 1                  | 2.71E-02 | 1                  | 2.10E-01 | 1                  | 2.10E-01 |                    |          |                    |          |
| POMT1       | 9   | 2                  | 4.99E-01 | 2                  | 4.99E-01 | 3                  | 2.10E-01 | 3                  | 2.10E-01 | 3                  | 3.99E-01 | 3                  | 3.99E-01 |
| CEP120      | 5   | 2                  | 8.18E-04 | 3                  | 8.18E-04 | 2                  | 2.10E-01 | 3                  | 2.10E-01 | 1                  | 1.00E+00 | 2                  | 1.00E+00 |
| ZKSCAN2     | 16  | 4                  | 7.46E-01 | 4                  | 7.46E-01 | 4                  | 3.21E-01 | 4                  | 3.21E-01 | 1                  | 2.10E-01 | 1                  | 2.10E-01 |
| CA9         | 9   | 2                  | 1.00E+00 | 2                  | 1.00E+00 | 2                  | 2.10E-01 | 2                  | 2.10E-01 | 1                  | 2.81E-01 | 1                  | 2.81E-01 |
| ASPG        | 14  | 3                  | 3.66E-01 | 3                  | 3.66E-01 | 4                  | 2.10E-01 | 4                  | 2.10E-01 | 2                  | 4.40E-01 | 2                  | 4.40E-01 |
| ADAM30      | 1   | 3                  | 5.64E-01 | 3                  | 5.64E-01 | 3                  | 4.20E-01 | 3                  | 4.20E-01 | 2                  | 2.10E-01 | 2                  | 2.10E-01 |
| PPP6R1      | 19  | 2                  | 5.29E-02 | 2                  | 5.29E-02 | 2                  | 2.11E-01 | 2                  | 2.11E-01 | 1                  | 5.17E-01 | 1                  | 5.17E-01 |
| PPAN-P2RY11 | 19  | 7                  | 9.45E-02 | 7                  | 9.45E-02 | 6                  | 3.52E-01 | 6                  | 3.52E-01 | 4                  | 2.11E-01 | 4                  | 2.11E-01 |
| CHPF2       | 7   | 5                  | 8.47E-01 | 5                  | 8.47E-01 | 5                  | 2.11E-01 | 5                  | 2.11E-01 | 3                  | 2.21E-01 | 3                  | 2.21E-01 |
| NACA2       | 17  | 1                  | 7.14E-02 | 2                  | 1.40E-01 |                    |          | 1                  | 2.11E-01 | 1                  | 6.50E-01 | 2                  | 7.43E-01 |
| ERCC4       | 16  | 5                  | 4.70E-02 | 6                  | 7.56E-02 | 3                  | 4.11E-01 | 4                  | 5.23E-01 | 4                  | 2.11E-01 | 5                  | 2.48E-01 |
| IL34        | 16  |                    |          | 1                  | 3.51E-01 |                    |          | 1                  | 2.11E-01 |                    |          | 1                  | 4.79E-01 |
| PBX3        | 9   | 1                  | 8.28E-01 | 1                  | 8.28E-01 | 1                  | 2.11E-01 | 1                  | 2.11E-01 | 1                  | 2.70E-01 | 1                  | 2.70E-01 |
| ADD3        | 10  | 3                  | 7.66E-01 | 3                  | 7.66E-01 | 3                  | 3.34E-01 | 3                  | 3.34E-01 | 1                  | 2.12E-01 | 1                  | 2.12E-01 |
| A2M         | 12  | 3                  | 9.01E-01 | 3                  | 9.01E-01 | 4                  | 2.24E-01 | 4                  | 2.24E-01 | 3                  | 2.12E-01 | 3                  | 2.12E-01 |
| ADAMTS14    | 10  | 11                 | 2.85E-01 | 11                 | 2.85E-01 | 8                  | 3.01E-01 | 8                  | 3.01E-01 | 7                  | 2.12E-01 | 7                  | 2.12E-01 |
| HHAT        | 1   | 2                  | 3.19E-02 | 4                  | 3.29E-02 | 1                  | 2.12E-01 | 3                  | 2.26E-01 | 2                  | 4.21E-01 | 4                  | 5.36E-01 |
| BBS10       | 12  | 2                  | 3.59E-01 | 2                  | 3.59E-01 | 2                  | 1.00E+00 | 2                  | 1.00E+00 | 1                  | 2.12E-01 | 1                  | 2.12E-01 |
| ARSJ        | 4   | 4                  | 8.03E-01 | 4                  | 8.03E-01 | 4                  | 2.12E-01 | 4                  | 2.12E-01 | 3                  | 3.21E-01 | 3                  | 3.21E-01 |
| TNIP3       | 4   | 1                  | 2.23E-01 | 1                  | 2.23E-01 | 1                  | 2.12E-01 | 1                  | 2.12E-01 | 1                  | 6.23E-01 | 1                  | 6.23E-01 |
| HES3        | 1   | 1                  | 1.00E+00 | 1                  | 1.00E+00 | 1                  | 2.12E-01 | 1                  | 2.12E-01 | 1                  | 2.53E-01 | 1                  | 2.53E-01 |
| CCR5        | 3   | 4                  | 2.60E-02 | 4                  | 2.60E-02 | 4                  | 2.13E-01 | 4                  | 2.13E-01 | 2                  | 1.00E+00 | 2                  | 1.00E+00 |
| SCARF1      | 17  | 3                  | 1.00E+00 | 3                  | 1.00E+00 | 3                  | 2.13E-01 | 3                  | 2.13E-01 | 3                  | 4.09E-01 | 3                  | 4.09E-01 |
| RUNX3       | 1   |                    |          | 1                  | 3.17E-02 |                    |          | 1                  | 9.14E-01 |                    |          | 1                  | 2.13E-01 |
| AHI1        | 6   | 8                  | 9.00E-02 | 8                  | 9.00E-02 | 5                  | 2.13E-01 | 5                  | 2.13E-01 | 6                  | 5.78E-01 | 6                  | 5.78E-01 |
| MAP4K2      | 11  | 2                  | 7.87E-01 | 2                  | 7.87E-01 | 3                  | 2.37E-01 | 3                  | 2.37E-01 | 2                  | 2.13E-01 | 2                  | 2.13E-01 |
| NEK5        | 13  | 3                  | 3.08E-01 | 4                  | 2.64E-01 | 3                  | 2.51E-01 | 4                  | 2.13E-01 | 1                  | 3.38E-01 | 2                  | 3.54E-01 |
| PLA2G2C     | 1   |                    |          | 1                  | 1.81E-01 |                    |          | 1                  | 4.74E-01 |                    |          | 1                  | 2.14E-01 |
| MYH9        | 22  | 7                  | 7.99E-02 | 7                  | 7.99E-02 | 6                  | 3.15E-01 | 6                  | 3.15E-01 | 3                  | 2.14E-01 | 3                  | 2.14E-01 |
| FAM81A      | 15  | 2                  | 1.36E-01 | 2                  | 1.36E-01 | 1                  | 2.91E-01 | 1                  | 2.91E-01 | 2                  | 2.14E-01 | 2                  | 2.14E-01 |
| TJAP1       | 6   | 4                  | 5.39E-01 | 4                  | 5.39E-01 | 3                  | 2.14E-01 | 3                  | 2.14E-01 | 2                  | 2.93E-01 | 2                  | 2.93E-01 |
| SIGLEC8     | 19  | 2                  | 5.74E-01 | 3                  | 5.83E-01 | 2                  | 6.26E-01 | 3                  | 6.49E-01 |                    |          | 1                  | 2.15E-01 |
| PCNX        | 14  | 7                  | 7.57E-02 | 7                  | 7.57E-02 | 7                  | 1.00E+00 | 7                  | 1.00E+00 | 1                  | 2.15E-01 | 1                  | 2.15E-01 |

| SetID    | Chr | ADEH- vs NA        |          |                    |          | ADEH+ vs ADEH-     |          |                    |          | ADEH+ vs NA        |          |                    |          |
|----------|-----|--------------------|----------|--------------------|----------|--------------------|----------|--------------------|----------|--------------------|----------|--------------------|----------|
|          |     | rarenovel          |          | all                |          | rarenovel          |          | all                |          | rarenovel          |          | all                |          |
|          |     | N variants in test | p-value  | N variants in test | p-value  | N variants in test | p-value  | N variants in test | p-value  | N variants in test | p-value  | N variants in test | p-value  |
| IRAK3    | 12  | 6                  | 2.83E-01 | 6                  | 2.83E-01 | 4                  | 2.15E-01 | 4                  | 2.15E-01 | 4                  | 4.79E-01 | 4                  | 4.79E-01 |
| DIAPH3   | 13  | 9                  | 1.00E+00 | 9                  | 1.00E+00 | 9                  | 2.16E-01 | 9                  | 2.16E-01 | 3                  | 2.33E-01 | 3                  | 2.33E-01 |
| TGM4     | 3   | 2                  | 5.96E-01 | 3                  | 7.51E-01 | 3                  | 3.14E-01 | 4                  | 3.35E-01 | 2                  | 2.16E-01 | 3                  | 2.26E-01 |
| EDC4     | 16  | 5                  | 4.31E-01 | 5                  | 4.31E-01 | 4                  | 2.16E-01 | 4                  | 2.16E-01 | 3                  | 2.54E-01 | 3                  | 2.54E-01 |
| DMRTA1   | 9   | 3                  | 6.33E-01 | 3                  | 6.33E-01 | 2                  | 2.16E-01 | 2                  | 2.16E-01 | 3                  | 4.21E-01 | 3                  | 4.21E-01 |
| ZNF596   | 8   | 4                  | 7.30E-01 | 4                  | 7.30E-01 | 4                  | 2.16E-01 | 4                  | 2.16E-01 | 3                  | 2.93E-01 | 3                  | 2.93E-01 |
| CCSER2   | 10  | 6                  | 6.42E-01 | 6                  | 6.42E-01 | 4                  | 2.16E-01 | 4                  | 2.16E-01 | 4                  | 2.28E-01 | 4                  | 2.28E-01 |
| TMPRSS7  | 3   | 4                  | 1.00E+00 | 4                  | 1.00E+00 | 3                  | 2.16E-01 | 3                  | 2.16E-01 | 4                  | 2.36E-01 | 4                  | 2.36E-01 |
| OR3A1    | 17  | 1                  | 1.00E+00 | 2                  | 1.00E+00 | 1                  | 2.16E-01 | 2                  | 2.16E-01 | 1                  | 3.46E-01 | 2                  | 3.46E-01 |
| FAM181B  | 11  | 1                  | 9.27E-01 | 1                  | 9.27E-01 | 1                  | 2.16E-01 | 1                  | 2.16E-01 | 1                  | 3.15E-01 | 1                  | 3.15E-01 |
| NAIP     | 5   | 1                  | 1.69E-01 | 1                  | 1.69E-01 | 1                  | 1.00E+00 | 1                  | 1.00E+00 | 1                  | 2.16E-01 | 1                  | 2.16E-01 |
| DNASE1L2 | 16  | 2                  | 2.06E-02 | 2                  | 2.06E-02 | 2                  | 4.84E-01 | 2                  | 4.84E-01 | 2                  | 2.16E-01 | 2                  | 2.16E-01 |
| KCNK18   | 10  | 1                  | 2.92E-01 | 1                  | 2.92E-01 | 1                  | 2.59E-01 | 1                  | 2.59E-01 | 1                  | 2.16E-01 | 1                  | 2.16E-01 |
| ULK4     | 3   | 4                  | 1.45E-01 | 4                  | 1.45E-01 | 4                  | 2.16E-01 | 4                  | 2.16E-01 | 3                  | 3.72E-01 | 3                  | 3.72E-01 |
| PPP1R32  | 11  | 4                  | 8.22E-01 | 4                  | 8.22E-01 | 3                  | 2.97E-01 | 3                  | 2.97E-01 | 2                  | 2.17E-01 | 2                  | 2.17E-01 |
| LRRC31   | 3   | 5                  | 1.58E-01 | 6                  | 1.20E-01 | 5                  | 4.11E-01 | 6                  | 9.38E-01 |                    |          | 1                  | 2.17E-01 |
| AGER     | 6   | 1                  | 1.20E-01 | 1                  | 1.20E-01 | 1                  | 2.17E-01 | 1                  | 2.17E-01 | 1                  | 6.41E-01 | 1                  | 6.41E-01 |
| FREM1    | 9   | 12                 | 3.14E-01 | 14                 | 2.68E-01 | 10                 | 3.13E-01 | 12                 | 2.17E-01 | 5                  | 7.58E-01 | 7                  | 5.29E-01 |
| ALG6     | 1   | 3                  | 4.17E-01 | 3                  | 4.17E-01 | 3                  | 5.36E-01 | 3                  | 5.36E-01 | 1                  | 2.17E-01 | 1                  | 2.17E-01 |
| ZFP14    | 19  | 1                  | 7.92E-01 | 1                  | 7.92E-01 | 1                  | 2.17E-01 | 1                  | 2.17E-01 | 1                  | 3.22E-01 | 1                  | 3.22E-01 |
| ZNF212   | 7   | 2                  | 1.62E-01 | 2                  | 1.62E-01 | 2                  | 2.17E-01 | 2                  | 2.17E-01 | 1                  | 4.46E-01 | 1                  | 4.46E-01 |
| TMEM144  | 4   | 2                  | 1.21E-01 | 2                  | 1.21E-01 | 2                  | 2.17E-01 | 2                  | 2.17E-01 | 1                  | 4.51E-01 | 1                  | 4.51E-01 |
| SNX19    | 11  | 1                  | 1.00E+00 | 1                  | 1.00E+00 | 1                  | 2.17E-01 | 1                  | 2.17E-01 | 1                  | 2.82E-01 | 1                  | 2.82E-01 |
| KANK1    | 9   | 9                  | 3.37E-02 | 9                  | 3.37E-02 | 6                  | 2.18E-01 | 6                  | 2.18E-01 | 5                  | 6.33E-01 | 5                  | 6.33E-01 |
| ABCB4    | 7   | 3                  | 6.46E-01 | 3                  | 6.46E-01 | 1                  | 2.18E-01 | 1                  | 2.18E-01 | 3                  | 2.87E-01 | 3                  | 2.87E-01 |
| ARL6IP6  | 2   | 1                  | 4.10E-01 | 1                  | 4.10E-01 | 1                  | 2.18E-01 | 1                  | 2.18E-01 | 1                  | 1.00E+00 | 1                  | 1.00E+00 |
| RGS22    | 8   | 5                  | 5.96E-01 | 5                  | 5.96E-01 | 5                  | 3.52E-01 | 5                  | 3.52E-01 | 2                  | 2.18E-01 | 2                  | 2.18E-01 |
| SYT8     | 11  | 4                  | 5.21E-01 | 5                  | 5.27E-01 | 3                  | 2.20E-01 | 4                  | 2.18E-01 | 2                  | 6.77E-01 | 3                  | 6.00E-01 |
| SIDT1    | 3   | 5                  | 1.15E-01 | 5                  | 1.15E-01 | 5                  | 6.96E-01 | 5                  | 6.96E-01 | 4                  | 2.18E-01 | 4                  | 2.18E-01 |
| PTPN22   | 1   | 4                  | 1.95E-01 | 4                  | 1.95E-01 | 4                  | 3.31E-01 | 4                  | 3.31E-01 | 2                  | 2.18E-01 | 2                  | 2.18E-01 |
| HPSE2    | 10  | 2                  | 7.71E-02 | 2                  | 7.71E-02 | 2                  | 2.18E-01 | 2                  | 2.18E-01 | 1                  | 1.00E+00 | 1                  | 1.00E+00 |
| GALNT11  | 7   | 3                  | 6.15E-01 | 3                  | 6.15E-01 | 2                  | 2.18E-01 | 2                  | 2.18E-01 | 2                  | 3.76E-01 | 2                  | 3.76E-01 |
| SWT1     | 1   | 2                  | 2.55E-02 | 2                  | 2.55E-02 | 2                  | 7.10E-01 | 2                  | 7.10E-01 | 1                  | 2.18E-01 | 1                  | 2.18E-01 |
| PDE6A    | 5   | 3                  | 1.00E+00 | 3                  | 1.00E+00 | 3                  | 2.93E-01 | 3                  | 2.93E-01 | 1                  | 2.18E-01 | 1                  | 2.18E-01 |
| EXOSC8   | 13  | 1                  | 4.72E-01 | 1                  | 4.72E-01 | 1                  | 2.19E-01 | 1                  | 2.19E-01 | 1                  | 3.24E-01 | 1                  | 3.24E-01 |
| SCN8A    | 12  | 3                  | 8.74E-01 | 3                  | 8.74E-01 | 2                  | 2.19E-01 | 2                  | 2.19E-01 | 2                  | 3.17E-01 | 2                  | 3.17E-01 |
| PTPRU    | 1   | 6                  | 1.00E+00 | 6                  | 1.00E+00 | 5                  | 2.19E-01 | 5                  | 2.19E-01 | 2                  | 2.98E-01 | 2                  | 2.98E-01 |
| PTCH2    | 1   | 2                  | 1.00E+00 | 2                  | 1.00E+00 | 2                  | 2.32E-01 | 2                  | 2.32E-01 | 1                  | 2.19E-01 | 1                  | 2.19E-01 |
| SERPINA9 | 14  | 2                  | 4.21E-01 | 2                  | 4.21E-01 | 2                  | 2.19E-01 | 2                  | 2.19E-01 | 1                  | 2.66E-01 | 1                  | 2.66E-01 |
| TMEM139  | 7   | 1                  | 4.12E-01 | 1                  | 4.12E-01 | 1                  | 2.67E-01 | 1                  | 2.67E-01 | 1                  | 2.19E-01 | 1                  | 2.19E-01 |
| SACS     | 13  | 5                  | 2.91E-01 | 5                  | 2.91E-01 | 5                  | 2.19E-01 | 5                  | 2.19E-01 | 6                  | 3.35E-01 | 6                  | 3.35E-01 |
| TTC28    | 22  | 11                 | 5.08E-01 | 12                 | 4.25E-01 | 7                  | 3.42E-01 | 8                  | 4.85E-01 | 7                  | 2.19E-01 | 8                  | 2.91E-01 |
| TMF1     | 3   | 4                  | 6.03E-01 | 5                  | 5.39E-01 | 4                  | 2.50E-01 | 5                  | 2.52E-01 | 1                  | 2.19E-01 | 2                  | 2.45E-01 |
| TCEB3    | 1   | 2                  | 5.85E-01 | 3                  | 2.86E-01 | 1                  | 2.66E-01 | 2                  | 4.23E-01 | 2                  | 2.82E-01 | 3                  | 2.19E-01 |
| ASCC3    | 6   | 5                  | 7.60E-01 | 6                  | 1.00E+00 | 4                  | 8.46E-01 | 5                  | 2.21E-01 | 1                  | 5.93E-01 | 2                  | 2.19E-01 |
| S1PR4    | 19  | 3                  | 7.51E-02 | 3                  | 7.51E-02 | 2                  | 4.03E-01 | 2                  | 4.03E-01 | 2                  | 2.19E-01 | 2                  | 2.19E-01 |
| CALD1    | 7   | 2                  | 5.32E-02 | 2                  | 5.32E-02 | 2                  | 2.20E-01 | 2                  | 2.20E-01 | 1                  | 5.77E-01 | 1                  | 5.77E-01 |
| RASEF    | 9   | 4                  | 2.39E-01 | 4                  | 2.39E-01 | 4                  | 2.20E-01 | 4                  | 2.20E-01 | 2                  | 5.24E-01 | 2                  | 5.24E-01 |



| SetID     | Chr | ADEH- vs NA        |          |                    |          | ADEH+ vs ADEH-     |          |                    |          | ADEH+ vs NA        |          |                    |          |
|-----------|-----|--------------------|----------|--------------------|----------|--------------------|----------|--------------------|----------|--------------------|----------|--------------------|----------|
|           |     | rarenovel          |          | all                |          | rarenovel          |          | all                |          | rarenovel          |          | all                |          |
|           |     | N variants in test | p-value  | N variants in test | p-value  | N variants in test | p-value  | N variants in test | p-value  | N variants in test | p-value  | N variants in test | p-value  |
| MYH1      | 17  | 13                 | 5.34E-01 | 13                 | 5.34E-01 | 7                  | 2.78E-01 | 7                  | 2.78E-01 | 8                  | 2.20E-01 | 8                  | 2.20E-01 |
| GNAT2     | 1   | 3                  | 1.99E-01 | 3                  | 1.99E-01 | 2                  | 3.63E-01 | 2                  | 3.63E-01 | 2                  | 2.20E-01 | 2                  | 2.20E-01 |
| VIT       | 2   | 4                  | 4.01E-01 | 4                  | 4.01E-01 | 5                  | 3.97E-01 | 5                  | 3.97E-01 | 2                  | 2.20E-01 | 2                  | 2.20E-01 |
| DENND1A   | 9   | 2                  | 7.94E-01 | 2                  | 7.94E-01 | 1                  | 2.20E-01 | 1                  | 2.20E-01 | 2                  | 2.39E-01 | 2                  | 2.39E-01 |
| NUP188    | 9   | 7                  | 3.98E-01 | 7                  | 3.98E-01 | 5                  | 2.20E-01 | 5                  | 2.20E-01 | 4                  | 7.92E-01 | 4                  | 7.92E-01 |
| PGS1      | 17  | 2                  | 7.93E-02 | 2                  | 7.93E-02 | 2                  | 6.59E-01 | 2                  | 6.59E-01 | 1                  | 2.20E-01 | 1                  | 2.20E-01 |
| MYOM3     | 1   | 4                  | 7.54E-01 | 5                  | 7.54E-01 | 3                  | 2.20E-01 | 4                  | 2.20E-01 | 3                  | 5.83E-01 | 4                  | 5.83E-01 |
| DHX38     | 16  | 4                  | 8.21E-01 | 4                  | 8.21E-01 | 3                  | 2.69E-01 | 3                  | 2.69E-01 | 2                  | 2.21E-01 | 2                  | 2.21E-01 |
| GBP6      | 1   | 6                  | 3.50E-01 | 6                  | 3.50E-01 | 5                  | 2.21E-01 | 5                  | 2.21E-01 | 4                  | 5.00E-01 | 4                  | 5.00E-01 |
| CGRRF1    | 14  | 1                  | 2.36E-01 | 1                  | 2.36E-01 | 1                  | 2.21E-01 | 1                  | 2.21E-01 | 1                  | 4.40E-01 | 1                  | 4.40E-01 |
| OR111     | 19  | 4                  | 8.07E-01 | 6                  | 8.36E-01 | 3                  | 2.62E-01 | 5                  | 2.76E-01 | 3                  | 2.21E-01 | 5                  | 2.54E-01 |
| TPR       | 1   | 8                  | 3.36E-01 | 8                  | 3.36E-01 | 7                  | 2.21E-01 | 7                  | 2.21E-01 | 4                  | 3.39E-01 | 4                  | 3.39E-01 |
| GSPT1     | 16  |                    |          | 1                  | 6.21E-01 |                    |          | 1                  | 2.21E-01 |                    |          | 1                  | 2.97E-01 |
| LOXL3     | 2   | 3                  | 6.00E-02 | 3                  | 6.00E-02 | 2                  | 2.21E-01 | 2                  | 2.21E-01 | 2                  | 1.00E+00 | 2                  | 1.00E+00 |
| RSPH14    | 22  | 4                  | 5.44E-01 | 5                  | 6.04E-01 | 3                  | 2.21E-01 | 4                  | 2.21E-01 | 5                  | 5.99E-01 | 6                  | 6.04E-01 |
| UGT2A1    | 4   | 9                  | 7.32E-01 | 11                 | 6.41E-01 | 8                  | 2.51E-01 | 10                 | 2.69E-01 | 5                  | 3.04E-01 | 7                  | 2.21E-01 |
| P2RY11    | 19  | 5                  | 7.28E-02 | 5                  | 7.28E-02 | 4                  | 4.07E-01 | 4                  | 4.07E-01 | 3                  | 2.21E-01 | 3                  | 2.21E-01 |
| ALX1      | 12  | 2                  | 4.98E-04 | 2                  | 4.98E-04 | 2                  | 2.21E-01 | 2                  | 2.21E-01 | 1                  | 6.44E-01 | 1                  | 6.44E-01 |
| CELA1     | 12  | 1                  | 6.48E-02 | 1                  | 6.48E-02 | 1                  | 5.59E-01 | 1                  | 5.59E-01 | 1                  | 2.22E-01 | 1                  | 2.22E-01 |
| MYH11     | 16  | 10                 | 1.60E-01 | 10                 | 1.60E-01 | 6                  | 3.45E-01 | 6                  | 3.45E-01 | 7                  | 2.22E-01 | 7                  | 2.22E-01 |
| C17orf77  | 17  | 1                  | 7.21E-01 | 2                  | 7.02E-01 | 1                  | 2.22E-01 | 2                  | 2.28E-01 | 1                  | 4.39E-01 | 2                  | 4.46E-01 |
| PRR14L    | 22  | 8                  | 1.00E+00 | 9                  | 1.00E+00 | 8                  | 2.33E-01 | 9                  | 2.22E-01 | 4                  | 3.60E-01 | 5                  | 2.40E-01 |
| MYO1H     | 12  | 9                  | 1.32E-01 | 10                 | 3.29E-01 | 9                  | 3.40E-01 | 10                 | 2.22E-01 | 1                  | 6.12E-01 | 2                  | 4.63E-01 |
| CTC1      | 17  | 1                  | 3.01E-01 | 1                  | 3.01E-01 | 1                  | 2.23E-01 | 1                  | 2.23E-01 | 1                  | 4.47E-01 | 1                  | 4.47E-01 |
| ZNF780A   | 19  | 4                  | 5.74E-01 | 4                  | 5.74E-01 | 2                  | 2.23E-01 | 2                  | 2.23E-01 | 3                  | 2.83E-01 | 3                  | 2.83E-01 |
| CGNL1     | 15  | 6                  | 2.50E-01 | 6                  | 2.50E-01 | 4                  | 2.23E-01 | 4                  | 2.23E-01 | 5                  | 5.22E-01 | 5                  | 5.22E-01 |
| VSIG10L   | 19  | 8                  | 2.24E-02 | 8                  | 2.24E-02 | 8                  | 2.23E-01 | 8                  | 2.23E-01 | 1                  | 6.44E-01 | 1                  | 6.44E-01 |
| CEP170B   | 14  | 12                 | 3.26E-01 | 12                 | 3.26E-01 | 11                 | 7.51E-01 | 11                 | 7.51E-01 | 3                  | 2.23E-01 | 3                  | 2.23E-01 |
| C16orf46  | 16  | 3                  | 5.57E-02 | 3                  | 5.57E-02 | 2                  | 2.23E-01 | 2                  | 2.23E-01 | 2                  | 3.27E-01 | 2                  | 3.27E-01 |
| SLC9C1    | 3   | 2                  | 8.59E-01 | 2                  | 8.59E-01 | 1                  | 2.23E-01 | 1                  | 2.23E-01 | 2                  | 3.12E-01 | 2                  | 3.12E-01 |
| ST18      | 8   | 5                  | 8.89E-02 | 5                  | 8.89E-02 | 5                  | 1.00E+00 | 5                  | 1.00E+00 | 1                  | 2.23E-01 | 1                  | 2.23E-01 |
| CAPS2     | 12  | 2                  | 6.72E-01 | 3                  | 6.72E-01 | 3                  | 2.23E-01 | 4                  | 2.23E-01 | 3                  | 3.58E-01 | 4                  | 3.58E-01 |
| TCAP      | 17  | 1                  | 1.00E+00 | 1                  | 1.00E+00 | 1                  | 2.36E-01 | 1                  | 2.36E-01 | 1                  | 2.23E-01 | 1                  | 2.23E-01 |
| SNX9      | 6   | 3                  | 7.79E-01 | 3                  | 7.79E-01 | 3                  | 2.35E-01 | 3                  | 2.35E-01 | 1                  | 2.23E-01 | 1                  | 2.23E-01 |
| METTL12   | 11  | 1                  | 6.30E-03 | 1                  | 6.30E-03 | 1                  | 5.52E-01 | 1                  | 5.52E-01 | 1                  | 2.24E-01 | 1                  | 2.24E-01 |
| ABCA7     | 19  | 11                 | 6.16E-01 | 11                 | 6.16E-01 | 8                  | 2.33E-01 | 8                  | 2.33E-01 | 6                  | 2.24E-01 | 6                  | 2.24E-01 |
| BACH2     | 6   | 1                  | 6.88E-01 | 1                  | 6.88E-01 | 1                  | 2.33E-01 | 1                  | 2.33E-01 | 1                  | 2.24E-01 | 1                  | 2.24E-01 |
| OR10G4    | 11  | 3                  | 6.49E-01 | 3                  | 6.49E-01 | 3                  | 3.31E-01 | 3                  | 3.31E-01 | 3                  | 2.24E-01 | 3                  | 2.24E-01 |
| OR56B4    | 11  | 2                  | 4.76E-01 | 2                  | 4.76E-01 | 1                  | 2.24E-01 | 1                  | 2.24E-01 | 2                  | 3.77E-01 | 2                  | 3.77E-01 |
| LINC00649 | 21  |                    |          | 1                  | 4.72E-01 |                    |          | 1                  | 3.84E-01 |                    |          | 1                  | 2.24E-01 |
| TRIO      | 5   | 6                  | 2.88E-01 | 6                  | 2.88E-01 | 3                  | 2.24E-01 | 3                  | 2.24E-01 | 4                  | 3.59E-01 | 4                  | 3.59E-01 |
| ACKR2     | 3   | 2                  | 1.00E+00 | 3                  | 8.35E-01 | 2                  | 3.54E-01 | 3                  | 3.91E-01 | 1                  | 2.25E-01 | 2                  | 4.55E-01 |
| PABPN1L   | 16  | 1                  | 6.71E-01 | 2                  | 8.13E-01 | 1                  | 5.07E-01 | 2                  | 2.25E-01 | 1                  | 5.98E-01 | 2                  | 2.28E-01 |
| ADAMTS15  | 11  | 4                  | 7.16E-01 | 4                  | 7.16E-01 | 4                  | 2.25E-01 | 4                  | 2.25E-01 | 2                  | 4.53E-01 | 2                  | 4.53E-01 |
| SVEP1     | 9   | 8                  | 8.21E-01 | 9                  | 8.70E-01 | 7                  | 2.87E-01 | 8                  | 2.63E-01 | 2                  | 2.68E-01 | 3                  | 2.25E-01 |
| IGFN1     | 1   | 6                  | 1.53E-02 | 6                  | 1.53E-02 | 4                  | 3.72E-01 | 4                  | 3.72E-01 | 3                  | 2.25E-01 | 3                  | 2.25E-01 |
| BLK       | 8   | 6                  | 2.33E-01 | 6                  | 2.33E-01 | 4                  | 3.15E-01 | 4                  | 3.15E-01 | 3                  | 2.25E-01 | 3                  | 2.25E-01 |
| DNAJC4    | 11  | 3                  | 5.45E-01 | 3                  | 5.45E-01 | 2                  | 2.44E-01 | 2                  | 2.44E-01 | 3                  | 2.25E-01 | 3                  | 2.25E-01 |

| SetID      | Chr | ADEH- vs NA        |          |                    |          | ADEH+ vs ADEH-     |          |                    |          | ADEH+ vs NA        |          |                    |          |
|------------|-----|--------------------|----------|--------------------|----------|--------------------|----------|--------------------|----------|--------------------|----------|--------------------|----------|
|            |     | rare novel         |          | all                |          | rare novel         |          | all                |          | rare novel         |          | all                |          |
|            |     | N variants in test | p-value  | N variants in test | p-value  | N variants in test | p-value  | N variants in test | p-value  | N variants in test | p-value  | N variants in test | p-value  |
| CRACR2A    | 12  | 4                  | 1.72E-02 | 4                  | 1.72E-02 | 4                  | 2.25E-01 | 4                  | 2.25E-01 |                    |          |                    |          |
| PLCG2      | 16  |                    |          | 1                  | 2.87E-01 |                    |          | 1                  | 2.25E-01 |                    |          | 1                  | 5.51E-01 |
| HR         | 8   | 7                  | 7.01E-01 | 7                  | 7.01E-01 | 7                  | 2.25E-01 | 7                  | 2.25E-01 | 3                  | 2.61E-01 | 3                  | 2.61E-01 |
| EXPH5      | 11  | 5                  | 3.91E-02 | 7                  | 5.54E-02 | 1                  | 2.25E-01 | 3                  | 2.37E-01 | 5                  | 1.00E+00 | 7                  | 1.00E+00 |
| TCHHL1     | 1   | 4                  | 3.42E-01 | 4                  | 3.42E-01 | 2                  | 3.81E-01 | 2                  | 3.81E-01 | 3                  | 2.26E-01 | 3                  | 2.26E-01 |
| COL20A1    | 20  | 6                  | 4.10E-01 | 6                  | 4.10E-01 | 6                  | 2.78E-01 | 6                  | 2.78E-01 | 4                  | 2.26E-01 | 4                  | 2.26E-01 |
| PYCR1      | 8   | 2                  | 7.51E-01 | 3                  | 7.24E-01 | 2                  | 2.47E-01 | 3                  | 2.48E-01 | 2                  | 2.26E-01 | 3                  | 2.29E-01 |
| NAPRT      | 8   | 2                  | 6.25E-01 | 2                  | 6.25E-01 | 2                  | 2.26E-01 | 2                  | 2.26E-01 | 1                  | 2.90E-01 | 1                  | 2.90E-01 |
| ZNF30      | 19  | 4                  | 3.60E-01 | 5                  | 3.59E-01 | 3                  | 2.83E-01 | 4                  | 2.84E-01 | 3                  | 2.26E-01 | 4                  | 2.26E-01 |
| CCDC180    | 9   | 10                 | 4.04E-01 | 10                 | 4.04E-01 | 6                  | 4.56E-01 | 6                  | 4.56E-01 | 7                  | 2.26E-01 | 7                  | 2.26E-01 |
| DLK1       | 14  | 2                  | 1.00E+00 | 2                  | 1.00E+00 | 2                  | 2.26E-01 | 2                  | 2.26E-01 | 2                  | 4.24E-01 | 2                  | 4.24E-01 |
| LMF1       | 16  | 3                  | 4.09E-01 | 3                  | 4.09E-01 | 3                  | 2.26E-01 | 3                  | 2.26E-01 | 3                  | 1.00E+00 | 3                  | 1.00E+00 |
| BLOC1S3    | 19  | 2                  | 7.00E-02 | 2                  | 7.00E-02 | 2                  | 6.31E-01 | 2                  | 6.31E-01 | 2                  | 2.26E-01 | 2                  | 2.26E-01 |
| VSX1       | 20  | 2                  | 6.47E-01 | 2                  | 6.47E-01 | 2                  | 2.43E-01 | 2                  | 2.43E-01 | 2                  | 2.26E-01 | 2                  | 2.26E-01 |
| WASF2      | 1   | 1                  | 6.26E-01 | 1                  | 6.26E-01 | 1                  | 2.26E-01 | 1                  | 2.26E-01 | 1                  | 3.40E-01 | 1                  | 3.40E-01 |
| C10orf90   | 10  | 8                  | 2.27E-01 | 8                  | 2.27E-01 | 6                  | 2.27E-01 | 6                  | 2.27E-01 | 3                  | 3.90E-01 | 3                  | 3.90E-01 |
| GLB1L      | 2   | 4                  | 6.41E-01 | 4                  | 6.41E-01 | 2                  | 2.51E-01 | 2                  | 2.51E-01 | 3                  | 2.27E-01 | 3                  | 2.27E-01 |
| EME1       | 17  | 4                  | 8.91E-01 | 4                  | 8.91E-01 | 4                  | 2.76E-01 | 4                  | 2.76E-01 | 1                  | 2.27E-01 | 1                  | 2.27E-01 |
| RAB25      | 1   | 2                  | 1.00E+00 | 2                  | 1.00E+00 | 2                  | 2.27E-01 | 2                  | 2.27E-01 | 2                  | 2.56E-01 | 2                  | 2.56E-01 |
| SLFN1      | 1   | 2                  | 5.34E-01 | 3                  | 5.32E-01 | 2                  | 4.27E-01 | 3                  | 4.27E-01 | 1                  | 2.28E-01 | 2                  | 2.27E-01 |
| IQCA1      | 2   | 8                  | 4.20E-01 | 8                  | 4.20E-01 | 8                  | 2.27E-01 | 8                  | 2.27E-01 | 3                  | 3.10E-01 | 3                  | 3.10E-01 |
| GUCA2A     | 1   | 3                  | 2.67E-01 | 3                  | 2.67E-01 | 3                  | 2.70E-01 | 3                  | 2.70E-01 | 3                  | 2.27E-01 | 3                  | 2.27E-01 |
| C14orf105  | 14  | 2                  | 1.00E+00 | 2                  | 1.00E+00 | 2                  | 2.57E-01 | 2                  | 2.57E-01 | 1                  | 2.27E-01 | 1                  | 2.27E-01 |
| SETD1B     | 12  | 4                  | 1.66E-01 | 4                  | 1.66E-01 | 5                  | 2.27E-01 | 5                  | 2.27E-01 | 2                  | 3.26E-01 | 2                  | 3.26E-01 |
| ITLN1      | 1   | 4                  | 1.47E-01 | 4                  | 1.47E-01 | 4                  | 4.23E-01 | 4                  | 4.23E-01 | 2                  | 2.28E-01 | 2                  | 2.28E-01 |
| NCOA5      | 20  | 3                  | 8.53E-01 | 3                  | 8.53E-01 | 2                  | 2.28E-01 | 2                  | 2.28E-01 | 2                  | 5.61E-01 | 2                  | 5.61E-01 |
| CINP       | 14  | 2                  | 1.00E+00 | 2                  | 1.00E+00 | 2                  | 2.62E-01 | 2                  | 2.62E-01 | 1                  | 2.28E-01 | 1                  | 2.28E-01 |
| DXO        | 6   | 1                  | 4.54E-01 | 1                  | 4.54E-01 | 1                  | 2.28E-01 | 1                  | 2.28E-01 | 1                  | 3.19E-01 | 1                  | 3.19E-01 |
| SLC43A1    | 11  | 4                  | 6.08E-01 | 4                  | 6.08E-01 | 3                  | 3.74E-01 | 3                  | 3.74E-01 | 2                  | 2.28E-01 | 2                  | 2.28E-01 |
| HUS1B      | 6   |                    |          | 1                  | 6.84E-01 |                    |          | 1                  | 2.74E-01 |                    |          | 1                  | 2.28E-01 |
| MSH5       | 6   | 3                  | 2.27E-01 | 3                  | 2.27E-01 | 2                  | 3.90E-01 | 2                  | 3.90E-01 | 3                  | 2.28E-01 | 3                  | 2.28E-01 |
| PRR5       | 22  | 2                  | 1.44E-01 | 2                  | 1.44E-01 | 2                  | 2.28E-01 | 2                  | 2.28E-01 | 1                  | 6.41E-01 | 1                  | 6.41E-01 |
| LIG1       | 19  | 5                  | 6.89E-02 | 5                  | 6.89E-02 | 3                  | 2.28E-01 | 3                  | 2.28E-01 | 3                  | 7.94E-01 | 3                  | 7.94E-01 |
| TCHP       | 12  | 5                  | 4.75E-01 | 5                  | 4.75E-01 | 4                  | 2.28E-01 | 4                  | 2.28E-01 | 3                  | 3.48E-01 | 3                  | 3.48E-01 |
| FAM71F2    | 7   | 3                  | 6.62E-02 | 4                  | 7.29E-02 | 2                  | 1.00E+00 | 3                  | 4.58E-01 | 2                  | 2.34E-01 | 3                  | 2.28E-01 |
| SAXO1      | 9   | 5                  | 2.40E-02 | 5                  | 2.40E-02 | 5                  | 2.29E-01 | 5                  | 2.29E-01 | 5                  | 5.73E-01 | 5                  | 5.73E-01 |
| NOC2L      | 1   | 5                  | 2.39E-01 | 5                  | 2.39E-01 | 4                  | 3.60E-01 | 4                  | 3.60E-01 | 2                  | 2.29E-01 | 2                  | 2.29E-01 |
| TPRN       | 9   | 4                  | 1.52E-01 | 4                  | 1.52E-01 | 4                  | 3.91E-01 | 4                  | 3.91E-01 | 2                  | 2.29E-01 | 2                  | 2.29E-01 |
| SIX6       | 14  | 1                  | 5.15E-01 | 1                  | 5.15E-01 | 1                  | 2.29E-01 | 1                  | 2.29E-01 | 1                  | 4.46E-01 | 1                  | 4.46E-01 |
| OR51F1     | 11  | 3                  | 5.34E-01 | 4                  | 5.40E-01 | 2                  | 3.44E-01 | 3                  | 3.48E-01 | 3                  | 2.29E-01 | 4                  | 2.32E-01 |
| C1orf100   | 1   | 1                  | 3.83E-01 | 1                  | 3.83E-01 | 1                  | 2.29E-01 | 1                  | 2.29E-01 | 1                  | 4.45E-01 | 1                  | 4.45E-01 |
| ASB3       | 2   | 3                  | 2.40E-01 | 3                  | 2.40E-01 | 2                  | 2.29E-01 | 2                  | 2.29E-01 | 2                  | 7.69E-01 | 2                  | 7.69E-01 |
| GPR75-ASB3 | 2   | 3                  | 2.40E-01 | 3                  | 2.40E-01 | 2                  | 2.29E-01 | 2                  | 2.29E-01 | 2                  | 7.69E-01 | 2                  | 7.69E-01 |
| STAU2      | 8   | 3                  | 8.78E-01 | 3                  | 8.78E-01 | 3                  | 2.51E-01 | 3                  | 2.51E-01 | 2                  | 2.29E-01 | 2                  | 2.29E-01 |
| GJA10      | 6   | 2                  | 7.04E-01 | 2                  | 7.04E-01 | 2                  | 3.37E-01 | 2                  | 3.37E-01 | 1                  | 2.30E-01 | 1                  | 2.30E-01 |
| ELSPBP1    | 19  | 3                  | 1.09E-02 | 4                  | 1.58E-02 | 3                  | 3.28E-01 | 4                  | 4.45E-01 | 3                  | 2.30E-01 | 4                  | 2.92E-01 |
| NMUR2      | 5   | 2                  | 1.00E+00 | 2                  | 1.00E+00 | 2                  | 2.30E-01 | 2                  | 2.30E-01 | 2                  | 3.23E-01 | 2                  | 3.23E-01 |
| GIGYF1     | 7   | 2                  | 8.74E-01 | 2                  | 8.74E-01 | 2                  | 2.30E-01 | 2                  | 2.30E-01 | 2                  | 4.30E-01 | 2                  | 4.30E-01 |

| SetID    | Chr | ADEH- vs NA        |          |                    |          | ADEH+ vs ADEH-     |          |                    |          | ADEH+ vs NA        |          |                    |          |
|----------|-----|--------------------|----------|--------------------|----------|--------------------|----------|--------------------|----------|--------------------|----------|--------------------|----------|
|          |     | rare novel         |          | all                |          | rare novel         |          | all                |          | rare novel         |          | all                |          |
|          |     | N variants in test | p-value  | N variants in test | p-value  | N variants in test | p-value  | N variants in test | p-value  | N variants in test | p-value  | N variants in test | p-value  |
| HSPB2    | 11  | 2                  | 4.96E-01 | 2                  | 4.96E-01 | 2                  | 3.89E-01 | 2                  | 3.89E-01 | 1                  | 2.30E-01 | 1                  | 2.30E-01 |
| STK32A   | 5   | 2                  | 4.18E-01 | 2                  | 4.18E-01 | 1                  | 2.30E-01 | 1                  | 2.30E-01 | 2                  | 3.56E-01 | 2                  | 3.56E-01 |
| CAPS     | 19  | 2                  | 5.48E-01 | 2                  | 5.48E-01 | 2                  | 2.72E-01 | 2                  | 2.72E-01 | 2                  | 2.30E-01 | 2                  | 2.30E-01 |
| KDELC2   | 11  | 1                  | 7.61E-01 | 1                  | 7.61E-01 | 1                  | 2.90E-01 | 1                  | 2.90E-01 | 1                  | 2.30E-01 | 1                  | 2.30E-01 |
| WFDC5    | 20  |                    |          | 1                  | 5.09E-01 |                    |          | 1                  | 3.22E-01 |                    |          | 1                  | 2.31E-01 |
| SLCO2B1  | 11  | 4                  | 1.00E+00 | 4                  | 1.00E+00 | 3                  | 2.31E-01 | 3                  | 2.31E-01 | 3                  | 3.37E-01 | 3                  | 3.37E-01 |
| S1PR5    | 19  | 2                  | 3.29E-01 | 2                  | 3.29E-01 | 2                  | 3.59E-01 | 2                  | 3.59E-01 | 2                  | 2.31E-01 | 2                  | 2.31E-01 |
| SECISBP2 | 9   | 2                  | 5.58E-01 | 2                  | 5.58E-01 | 2                  | 3.53E-01 | 2                  | 3.53E-01 | 1                  | 2.31E-01 | 1                  | 2.31E-01 |
| COMP     | 19  | 4                  | 4.49E-01 | 4                  | 4.49E-01 | 3                  | 5.79E-01 | 3                  | 5.79E-01 | 2                  | 2.31E-01 | 2                  | 2.31E-01 |
| SEMA6A   | 5   | 1                  | 4.02E-01 | 1                  | 4.02E-01 | 1                  | 2.31E-01 | 1                  | 2.31E-01 | 1                  | 4.38E-01 | 1                  | 4.38E-01 |
| ZMYM6    | 1   | 5                  | 6.64E-01 | 5                  | 6.64E-01 | 5                  | 2.31E-01 | 5                  | 2.31E-01 | 4                  | 5.07E-01 | 4                  | 5.07E-01 |
| INADL    | 1   | 9                  | 4.30E-01 | 12                 | 5.29E-01 | 10                 | 4.22E-01 | 13                 | 3.21E-01 | 6                  | 3.32E-01 | 9                  | 2.32E-01 |
| CBFA2T3  | 16  | 8                  | 9.82E-02 | 8                  | 9.82E-02 | 6                  | 2.32E-01 | 6                  | 2.32E-01 | 3                  | 4.84E-01 | 3                  | 4.84E-01 |
| MICAL1   | 6   | 8                  | 2.91E-01 | 8                  | 2.91E-01 | 6                  | 2.32E-01 | 6                  | 2.32E-01 | 3                  | 6.94E-01 | 3                  | 6.94E-01 |
| SYCP1    | 1   | 4                  | 6.46E-01 | 4                  | 6.46E-01 | 4                  | 2.51E-01 | 4                  | 2.51E-01 | 3                  | 2.32E-01 | 3                  | 2.32E-01 |
| SULT1C4  | 2   | 2                  | 4.57E-01 | 2                  | 4.57E-01 | 2                  | 2.32E-01 | 2                  | 2.32E-01 | 2                  | 4.58E-01 | 2                  | 4.58E-01 |
| C1orf35  | 1   | 1                  | 6.87E-01 | 1                  | 6.87E-01 | 1                  | 2.32E-01 | 1                  | 2.32E-01 | 1                  | 3.39E-01 | 1                  | 3.39E-01 |
| ZBP1     | 20  | 4                  | 2.76E-01 | 4                  | 2.76E-01 | 5                  | 2.62E-01 | 5                  | 2.62E-01 | 3                  | 2.33E-01 | 3                  | 2.33E-01 |
| OR2Y1    | 5   | 2                  | 1.00E+00 | 2                  | 1.00E+00 | 3                  | 2.38E-01 | 3                  | 2.38E-01 | 2                  | 2.33E-01 | 2                  | 2.33E-01 |
| IGHMBP2  | 11  | 3                  | 6.53E-01 | 3                  | 6.53E-01 | 4                  | 2.33E-01 | 4                  | 2.33E-01 | 3                  | 3.42E-01 | 3                  | 3.42E-01 |
| TMEM2    | 9   | 4                  | 6.46E-01 | 4                  | 6.46E-01 | 4                  | 2.33E-01 | 4                  | 2.33E-01 | 3                  | 2.71E-01 | 3                  | 2.71E-01 |
| PRSS50   | 3   | 1                  | 2.41E-02 | 1                  | 2.41E-02 | 1                  | 4.35E-01 | 1                  | 4.35E-01 | 1                  | 2.33E-01 | 1                  | 2.33E-01 |
| MYADML2  | 17  | 4                  | 5.79E-01 | 4                  | 5.79E-01 | 4                  | 5.45E-01 | 4                  | 5.45E-01 | 2                  | 2.33E-01 | 2                  | 2.33E-01 |
| MCCC2    | 5   | 5                  | 5.55E-03 | 5                  | 5.55E-03 | 2                  | 6.09E-01 | 2                  | 6.09E-01 | 4                  | 2.33E-01 | 4                  | 2.33E-01 |
| OR10G8   | 11  | 1                  | 6.61E-01 | 1                  | 6.61E-01 | 1                  | 1.00E+00 | 1                  | 1.00E+00 | 1                  | 2.33E-01 | 1                  | 2.33E-01 |
| SLC37A1  | 21  | 2                  | 2.03E-01 | 2                  | 2.03E-01 | 2                  | 4.15E-01 | 2                  | 4.15E-01 | 1                  | 2.33E-01 | 1                  | 2.33E-01 |
| OR2G2    | 1   | 1                  | 7.28E-01 | 3                  | 8.14E-01 | 1                  | 4.34E-01 | 3                  | 5.06E-01 |                    |          | 2                  | 2.33E-01 |
| ESYT2    | 7   | 6                  | 1.00E+00 | 6                  | 1.00E+00 | 5                  | 3.86E-01 | 5                  | 3.86E-01 | 3                  | 2.33E-01 | 3                  | 2.33E-01 |
| SLC22A11 | 11  | 4                  | 1.22E-01 | 4                  | 1.22E-01 | 4                  | 1.00E+00 | 4                  | 1.00E+00 | 1                  | 2.33E-01 | 1                  | 2.33E-01 |
| MRPS16   | 10  | 1                  | 1.00E+00 | 1                  | 1.00E+00 | 1                  | 2.34E-01 | 1                  | 2.34E-01 | 1                  | 2.48E-01 | 1                  | 2.48E-01 |
| LGR5     | 12  | 7                  | 4.13E-01 | 7                  | 4.13E-01 | 6                  | 2.34E-01 | 6                  | 2.34E-01 | 3                  | 3.86E-01 | 3                  | 3.86E-01 |
| CCDC136  | 7   | 9                  | 2.48E-01 | 9                  | 2.48E-01 | 5                  | 2.34E-01 | 5                  | 2.34E-01 | 9                  | 6.26E-01 | 9                  | 6.26E-01 |
| SNUPN    | 15  | 3                  | 4.14E-01 | 3                  | 4.14E-01 | 3                  | 2.34E-01 | 3                  | 2.34E-01 | 2                  | 6.75E-01 | 2                  | 6.75E-01 |
| CCDC42   | 17  | 3                  | 1.17E-01 | 3                  | 1.17E-01 | 3                  | 2.34E-01 | 3                  | 2.34E-01 | 3                  | 1.00E+00 | 3                  | 1.00E+00 |
| CCDC93   | 2   | 4                  | 5.24E-01 | 5                  | 2.40E-01 | 4                  | 5.33E-01 | 5                  | 1.00E+00 | 1                  | 1.00E+00 | 2                  | 2.34E-01 |
| NADSYN1  | 11  | 7                  | 5.10E-01 | 7                  | 5.10E-01 | 5                  | 7.15E-01 | 5                  | 7.15E-01 | 4                  | 2.34E-01 | 4                  | 2.34E-01 |
| KIAA0391 | 14  | 2                  | 6.93E-01 | 2                  | 6.93E-01 | 2                  | 2.34E-01 | 2                  | 2.34E-01 | 1                  | 3.04E-01 | 1                  | 3.04E-01 |
| SEL1L    | 14  | 3                  | 5.14E-01 | 3                  | 5.14E-01 | 4                  | 2.34E-01 | 4                  | 2.34E-01 | 2                  | 3.36E-01 | 2                  | 3.36E-01 |
| NGB      | 14  | 1                  | 9.37E-01 | 1                  | 9.37E-01 | 1                  | 2.34E-01 | 1                  | 2.34E-01 | 1                  | 5.54E-01 | 1                  | 5.54E-01 |
| IL25     | 14  | 3                  | 5.14E-01 | 3                  | 5.14E-01 | 3                  | 2.34E-01 | 3                  | 2.34E-01 | 2                  | 2.90E-01 | 2                  | 2.90E-01 |
| KNSTRN   | 15  | 1                  | 6.59E-02 | 2                  | 2.25E-02 |                    |          | 1                  | 2.34E-01 | 1                  | 5.63E-01 | 2                  | 5.54E-01 |
| EIF4B    | 12  | 1                  | 7.43E-01 | 2                  | 7.17E-01 | 1                  | 5.15E-01 | 2                  | 3.44E-01 |                    |          | 1                  | 2.35E-01 |
| PPP2R1B  | 11  | 5                  | 3.75E-02 | 5                  | 3.75E-02 | 4                  | 3.83E-01 | 4                  | 3.83E-01 | 2                  | 2.35E-01 | 2                  | 2.35E-01 |
| ERCC2    | 19  | 9                  | 6.83E-01 | 9                  | 6.83E-01 | 8                  | 4.09E-01 | 8                  | 4.09E-01 | 3                  | 2.35E-01 | 3                  | 2.35E-01 |
| FAT1     | 4   | 18                 | 6.06E-01 | 18                 | 6.06E-01 | 16                 | 2.35E-01 | 16                 | 2.35E-01 | 12                 | 2.52E-01 | 12                 | 2.52E-01 |
| KCNH6    | 17  | 5                  | 1.85E-01 | 5                  | 1.85E-01 | 3                  | 5.03E-01 | 3                  | 5.03E-01 | 3                  | 2.35E-01 | 3                  | 2.35E-01 |
| RELN     | 7   | 7                  | 1.00E+00 | 7                  | 1.00E+00 | 7                  | 3.37E-01 | 7                  | 3.37E-01 | 5                  | 2.35E-01 | 5                  | 2.35E-01 |
| DEFB119  | 20  | 4                  | 3.81E-01 | 4                  | 3.81E-01 | 4                  | 5.63E-01 | 4                  | 5.63E-01 | 3                  | 2.35E-01 | 3                  | 2.35E-01 |

| SetID    | Chr | ADEH- vs NA        |          |                    |          | ADEH+ vs ADEH-     |          |                    |          | ADEH+ vs NA        |          |                    |          |
|----------|-----|--------------------|----------|--------------------|----------|--------------------|----------|--------------------|----------|--------------------|----------|--------------------|----------|
|          |     | rarenovel          |          | all                |          | rarenovel          |          | all                |          | rarenovel          |          | all                |          |
|          |     | N variants in test | p-value  | N variants in test | p-value  | N variants in test | p-value  | N variants in test | p-value  | N variants in test | p-value  | N variants in test | p-value  |
| TPD52L3  | 9   | 3                  | 1.83E-01 | 3                  | 1.83E-01 | 3                  | 2.53E-01 | 3                  | 2.53E-01 | 2                  | 2.35E-01 | 2                  | 2.35E-01 |
| OR56A5   | 11  |                    |          | 1                  | 4.48E-01 |                    |          | 1                  | 2.35E-01 |                    |          | 1                  | 3.88E-01 |
| CRNKL1   | 20  | 1                  | 6.84E-01 | 1                  | 6.84E-01 | 1                  | 2.55E-01 | 1                  | 2.55E-01 | 1                  | 2.36E-01 | 1                  | 2.36E-01 |
| TTI1     | 20  | 3                  | 6.94E-01 | 3                  | 6.94E-01 | 2                  | 2.60E-01 | 2                  | 2.60E-01 | 3                  | 2.36E-01 | 3                  | 2.36E-01 |
| SPATA6   | 1   | 4                  | 4.70E-01 | 5                  | 4.70E-01 | 2                  | 2.36E-01 | 3                  | 2.36E-01 | 3                  | 4.22E-01 | 4                  | 4.22E-01 |
| AP5Z1    | 7   | 7                  | 3.52E-03 | 7                  | 3.52E-03 | 7                  | 2.36E-01 | 7                  | 2.36E-01 |                    |          |                    |          |
| UACA     | 15  | 7                  | 7.03E-01 | 7                  | 7.03E-01 | 6                  | 2.36E-01 | 6                  | 2.36E-01 | 5                  | 3.55E-01 | 5                  | 3.55E-01 |
| CCPG1    | 15  | 5                  | 7.43E-01 | 5                  | 7.43E-01 | 3                  | 2.36E-01 | 3                  | 2.36E-01 | 4                  | 2.49E-01 | 4                  | 2.49E-01 |
| VWC2     | 7   | 2                  | 5.66E-01 | 2                  | 5.66E-01 | 2                  | 2.36E-01 | 2                  | 2.36E-01 | 2                  | 5.11E-01 | 2                  | 5.11E-01 |
| EPN3     | 17  | 5                  | 5.41E-01 | 5                  | 5.41E-01 | 3                  | 2.36E-01 | 3                  | 2.36E-01 | 5                  | 4.54E-01 | 5                  | 4.54E-01 |
| SLC10A2  | 13  | 8                  | 1.00E+00 | 8                  | 1.00E+00 | 6                  | 2.36E-01 | 6                  | 2.36E-01 | 4                  | 2.92E-01 | 4                  | 2.92E-01 |
| MRPS5    | 2   | 1                  | 9.17E-01 | 1                  | 9.17E-01 | 1                  | 2.36E-01 | 1                  | 2.36E-01 | 1                  | 3.42E-01 | 1                  | 3.42E-01 |
| TANGO2   | 22  | 2                  | 6.42E-01 | 2                  | 6.42E-01 | 2                  | 3.10E-01 | 2                  | 3.10E-01 | 1                  | 2.37E-01 | 1                  | 2.37E-01 |
| HAPLN3   | 15  | 2                  | 6.51E-01 | 3                  | 6.51E-01 | 2                  | 4.52E-01 | 3                  | 4.52E-01 | 1                  | 2.37E-01 | 2                  | 2.37E-01 |
| NQO1     | 16  | 3                  | 6.12E-01 | 3                  | 6.12E-01 | 3                  | 3.98E-01 | 3                  | 3.98E-01 | 2                  | 2.37E-01 | 2                  | 2.37E-01 |
| ADAM32   | 8   | 5                  | 2.49E-01 | 5                  | 2.49E-01 | 4                  | 2.37E-01 | 4                  | 2.37E-01 | 3                  | 4.36E-01 | 3                  | 4.36E-01 |
| HEXDC    | 17  | 3                  | 2.83E-01 | 3                  | 2.83E-01 | 2                  | 4.11E-01 | 2                  | 4.11E-01 | 2                  | 2.37E-01 | 2                  | 2.37E-01 |
| C8orf34  | 8   | 1                  | 4.08E-01 | 1                  | 4.08E-01 | 2                  | 2.37E-01 | 2                  | 2.37E-01 | 2                  | 3.22E-01 | 2                  | 3.22E-01 |
| GRIN3A   | 9   | 13                 | 5.57E-02 | 13                 | 5.57E-02 | 7                  | 2.37E-01 | 7                  | 2.37E-01 | 8                  | 7.93E-01 | 8                  | 7.93E-01 |
| IER5     | 1   | 1                  | 5.72E-01 | 1                  | 5.72E-01 | 1                  | 2.70E-01 | 1                  | 2.70E-01 | 1                  | 2.37E-01 | 1                  | 2.37E-01 |
| ITPRIPL2 | 16  | 2                  | 7.74E-01 | 2                  | 7.74E-01 | 1                  | 2.37E-01 | 1                  | 2.37E-01 | 2                  | 3.50E-01 | 2                  | 3.50E-01 |
| LAMB3    | 1   | 13                 | 6.01E-01 | 13                 | 6.01E-01 | 13                 | 2.87E-01 | 13                 | 2.87E-01 | 7                  | 2.37E-01 | 7                  | 2.37E-01 |
| PDE7A    | 8   | 4                  | 1.40E-01 | 5                  | 2.76E-01 | 4                  | 9.02E-01 | 5                  | 7.44E-01 |                    |          | 1                  | 2.37E-01 |
| OR5M1    | 11  | 1                  | 8.38E-01 | 1                  | 8.38E-01 | 1                  | 2.37E-01 | 1                  | 2.37E-01 | 1                  | 2.74E-01 | 1                  | 2.74E-01 |
| KIAA0930 | 22  | 1                  | 1.72E-01 | 1                  | 1.72E-01 | 1                  | 2.37E-01 | 1                  | 2.37E-01 | 1                  | 6.30E-01 | 1                  | 6.30E-01 |
| F5       | 1   | 6                  | 2.23E-01 | 7                  | 4.45E-01 | 6                  | 1.00E+00 | 7                  | 1.00E+00 | 3                  | 2.38E-01 | 4                  | 2.86E-01 |
| PLEKHA6  | 1   | 4                  | 6.97E-03 | 4                  | 6.97E-03 | 3                  | 6.30E-01 | 3                  | 6.30E-01 | 2                  | 2.38E-01 | 2                  | 2.38E-01 |
| HHIPL2   | 1   | 4                  | 1.43E-01 | 4                  | 1.43E-01 | 3                  | 2.38E-01 | 3                  | 2.38E-01 | 2                  | 6.46E-01 | 2                  | 6.46E-01 |
| TBX6     | 16  | 1                  | 5.35E-01 | 1                  | 5.35E-01 | 1                  | 2.38E-01 | 1                  | 2.38E-01 | 1                  | 4.47E-01 | 1                  | 4.47E-01 |
| SPECC1L  | 22  | 6                  | 8.87E-01 | 6                  | 8.87E-01 | 5                  | 2.46E-01 | 5                  | 2.46E-01 | 3                  | 2.38E-01 | 3                  | 2.38E-01 |
| RAG2     | 11  | 3                  | 7.46E-01 | 3                  | 7.46E-01 | 3                  | 2.38E-01 | 3                  | 2.38E-01 | 3                  | 2.63E-01 | 3                  | 2.63E-01 |
| AAMDC    | 11  |                    |          | 1                  | 2.88E-01 |                    |          | 1                  | 2.38E-01 |                    |          | 1                  | 4.81E-01 |
| TRIM4    | 7   | 2                  | 3.35E-01 | 3                  | 6.23E-01 | 1                  | 5.78E-01 | 2                  | 2.38E-01 | 1                  | 6.11E-01 | 2                  | 3.24E-01 |
| EP300    | 22  | 8                  | 6.71E-01 | 8                  | 6.71E-01 | 7                  | 2.38E-01 | 7                  | 2.38E-01 | 5                  | 4.20E-01 | 5                  | 4.20E-01 |
| PLCH1    | 3   | 5                  | 3.99E-01 | 5                  | 3.99E-01 | 4                  | 2.38E-01 | 4                  | 2.38E-01 | 3                  | 2.98E-01 | 3                  | 2.98E-01 |
| USP29    | 19  | 2                  | 6.60E-01 | 3                  | 6.62E-01 | 2                  | 3.95E-01 | 3                  | 4.38E-01 | 1                  | 2.38E-01 | 2                  | 2.46E-01 |
| ZNF638   | 2   | 6                  | 3.60E-01 | 6                  | 3.60E-01 | 6                  | 2.38E-01 | 6                  | 2.38E-01 | 3                  | 8.08E-01 | 3                  | 8.08E-01 |
| ARHGAP24 | 4   | 2                  | 7.48E-02 | 2                  | 7.48E-02 | 2                  | 2.38E-01 | 2                  | 2.38E-01 | 1                  | 6.03E-01 | 1                  | 6.03E-01 |
| NEGR1    | 1   | 2                  | 5.66E-01 | 2                  | 5.66E-01 | 2                  | 2.39E-01 | 2                  | 2.39E-01 | 1                  | 2.99E-01 | 1                  | 2.99E-01 |
| CCDC129  | 7   | 5                  | 5.81E-01 | 5                  | 5.81E-01 | 4                  | 2.39E-01 | 4                  | 2.39E-01 | 4                  | 4.87E-01 | 4                  | 4.87E-01 |
| WDR47    | 1   | 3                  | 7.13E-02 | 3                  | 7.13E-02 | 2                  | 4.20E-01 | 2                  | 4.20E-01 | 2                  | 2.39E-01 | 2                  | 2.39E-01 |
| ADAMDEC1 | 8   | 2                  | 6.50E-01 | 2                  | 6.50E-01 | 2                  | 3.74E-01 | 2                  | 3.74E-01 | 2                  | 2.39E-01 | 2                  | 2.39E-01 |
| ZNF619   | 3   | 2                  | 2.34E-02 | 2                  | 2.34E-02 | 2                  | 6.44E-01 | 2                  | 6.44E-01 | 1                  | 2.39E-01 | 1                  | 2.39E-01 |
| LIMS2    | 2   | 1                  | 3.91E-01 | 1                  | 3.91E-01 | 1                  | 3.57E-01 | 1                  | 3.57E-01 | 1                  | 2.39E-01 | 1                  | 2.39E-01 |
| GCFC2    | 2   | 5                  | 1.31E-01 | 5                  | 1.31E-01 | 5                  | 2.39E-01 | 5                  | 2.39E-01 | 2                  | 6.91E-01 | 2                  | 6.91E-01 |
| CLEC10A  | 17  | 3                  | 7.25E-02 | 3                  | 7.25E-02 | 1                  | 2.40E-01 | 1                  | 2.40E-01 | 3                  | 1.00E+00 | 3                  | 1.00E+00 |
| TRIM6    | 11  | 3                  | 8.68E-01 | 3                  | 8.68E-01 | 3                  | 3.02E-01 | 3                  | 3.02E-01 | 2                  | 2.40E-01 | 2                  | 2.40E-01 |
| PHLDB1   | 11  | 13                 | 4.49E-01 | 13                 | 4.49E-01 | 10                 | 3.84E-01 | 10                 | 3.84E-01 | 6                  | 2.40E-01 | 6                  | 2.40E-01 |

| SetID        | Chr | ADEH- vs NA        |          |                    |          | ADEH+ vs ADEH-     |          |                    |          | ADEH+ vs NA        |          |                    |          |
|--------------|-----|--------------------|----------|--------------------|----------|--------------------|----------|--------------------|----------|--------------------|----------|--------------------|----------|
|              |     | rarenovel          |          | all                |          | rarenovel          |          | all                |          | rarenovel          |          | all                |          |
|              |     | N variants in test | p-value  | N variants in test | p-value  | N variants in test | p-value  | N variants in test | p-value  | N variants in test | p-value  | N variants in test | p-value  |
| UNC13D       | 17  | 5                  | 3.83E-01 | 5                  | 3.83E-01 | 4                  | 2.40E-01 | 4                  | 2.40E-01 | 4                  | 4.79E-01 | 4                  | 4.79E-01 |
| ATP6VOA2     | 12  | 3                  | 7.42E-01 | 3                  | 7.42E-01 | 4                  | 3.53E-01 | 4                  | 3.53E-01 | 2                  | 2.40E-01 | 2                  | 2.40E-01 |
| MRI1         | 19  | 5                  | 8.41E-01 | 5                  | 8.41E-01 | 5                  | 4.91E-01 | 5                  | 4.91E-01 | 2                  | 2.40E-01 | 2                  | 2.40E-01 |
| EPHA8        | 1   | 9                  | 3.78E-01 | 9                  | 3.78E-01 | 8                  | 2.40E-01 | 8                  | 2.40E-01 | 6                  | 5.66E-01 | 6                  | 5.66E-01 |
| GMPR         | 6   | 2                  | 4.06E-01 | 2                  | 4.06E-01 | 2                  | 4.85E-01 | 2                  | 4.85E-01 | 1                  | 2.40E-01 | 1                  | 2.40E-01 |
| FAM83A       | 8   | 2                  | 5.38E-01 | 2                  | 5.38E-01 | 2                  | 2.40E-01 | 2                  | 2.40E-01 | 2                  | 2.96E-01 | 2                  | 2.96E-01 |
| ANKRD31      | 5   | 2                  | 4.88E-01 | 2                  | 4.88E-01 | 2                  | 2.40E-01 | 2                  | 2.40E-01 | 1                  | 1.00E+00 | 1                  | 1.00E+00 |
| DUSP23       | 1   | 1                  | 6.77E-01 | 2                  | 3.85E-01 | 1                  | 5.09E-01 | 2                  | 2.55E-01 | 1                  | 6.57E-01 | 2                  | 2.40E-01 |
| RANBP17      | 5   | 7                  | 1.82E-01 | 7                  | 1.82E-01 | 4                  | 2.40E-01 | 4                  | 2.40E-01 | 6                  | 6.84E-01 | 6                  | 6.84E-01 |
| MLNR         | 13  | 1                  | 8.54E-01 | 1                  | 8.54E-01 | 1                  | 2.40E-01 | 1                  | 2.40E-01 | 1                  | 3.82E-01 | 1                  | 3.82E-01 |
| KIF16B       | 20  | 9                  | 3.50E-01 | 9                  | 3.50E-01 | 5                  | 3.05E-01 | 5                  | 3.05E-01 | 5                  | 2.41E-01 | 5                  | 2.41E-01 |
| DFFA         | 1   | 1                  | 1.94E-02 | 1                  | 1.94E-02 | 1                  | 5.06E-01 | 1                  | 5.06E-01 | 1                  | 2.41E-01 | 1                  | 2.41E-01 |
| POLI         | 18  | 4                  | 4.64E-02 | 4                  | 4.64E-02 | 4                  | 1.00E+00 | 4                  | 1.00E+00 | 2                  | 2.41E-01 | 2                  | 2.41E-01 |
| SEC14L1      | 17  | 5                  | 4.16E-01 | 5                  | 4.16E-01 | 4                  | 2.41E-01 | 4                  | 2.41E-01 | 3                  | 2.99E-01 | 3                  | 2.99E-01 |
| BANK1        | 4   | 3                  | 4.48E-02 | 3                  | 4.48E-02 | 4                  | 2.41E-01 | 4                  | 2.41E-01 | 2                  | 2.59E-01 | 2                  | 2.59E-01 |
| LOC100132146 | 3   | 1                  | 1.00E+00 | 1                  | 1.00E+00 | 1                  | 2.41E-01 | 1                  | 2.41E-01 | 1                  | 2.66E-01 | 1                  | 2.66E-01 |
| INTS7        | 1   | 2                  | 6.77E-01 | 2                  | 6.77E-01 | 2                  | 2.41E-01 | 2                  | 2.41E-01 | 1                  | 2.58E-01 | 1                  | 2.58E-01 |
| ATP6AP1L     | 5   | 2                  | 5.40E-01 | 2                  | 5.40E-01 | 2                  | 2.41E-01 | 2                  | 2.41E-01 | 2                  | 3.45E-01 | 2                  | 3.45E-01 |
| ABCF3        | 3   | 2                  | 8.23E-02 | 2                  | 8.23E-02 | 2                  | 5.98E-01 | 2                  | 5.98E-01 | 1                  | 2.42E-01 | 1                  | 2.42E-01 |
| IRGC         | 19  | 6                  | 8.58E-01 | 6                  | 8.58E-01 | 5                  | 2.42E-01 | 5                  | 2.42E-01 | 3                  | 5.15E-01 | 3                  | 5.15E-01 |
| FAM160B2     | 8   | 6                  | 2.33E-01 | 6                  | 2.33E-01 | 5                  | 2.42E-01 | 5                  | 2.42E-01 | 2                  | 4.41E-01 | 2                  | 4.41E-01 |
| CAMKK2       | 12  | 1                  | 7.59E-01 | 2                  | 6.66E-01 | 1                  | 5.54E-01 | 2                  | 6.62E-01 |                    |          | 1                  | 2.42E-01 |
| ENPP5        | 6   | 1                  | 6.71E-01 | 2                  | 1.00E+00 | 1                  | 4.85E-01 | 2                  | 2.42E-01 | 1                  | 6.28E-01 | 2                  | 2.93E-01 |
| SNX17        | 2   | 1                  | 3.14E-01 | 1                  | 3.14E-01 | 1                  | 2.42E-01 | 1                  | 2.42E-01 | 1                  | 4.49E-01 | 1                  | 4.49E-01 |
| MAST2        | 1   | 10                 | 7.78E-01 | 10                 | 7.78E-01 | 8                  | 3.45E-01 | 8                  | 3.45E-01 | 5                  | 2.42E-01 | 5                  | 2.42E-01 |
| OR8B4        | 11  | 2                  | 4.92E-01 | 4                  | 4.92E-01 | 1                  | 2.43E-01 | 3                  | 2.45E-01 | 2                  | 3.63E-01 | 4                  | 3.66E-01 |
| RBM47        | 4   | 1                  | 4.64E-02 | 1                  | 4.64E-02 | 1                  | 2.43E-01 | 1                  | 2.43E-01 |                    |          |                    |          |
| NEDD4        | 15  | 11                 | 1.72E-02 | 11                 | 1.72E-02 | 4                  | 6.33E-01 | 4                  | 6.33E-01 | 8                  | 2.43E-01 | 8                  | 2.43E-01 |
| GRB7         | 17  | 5                  | 5.42E-01 | 5                  | 5.42E-01 | 5                  | 2.43E-01 | 5                  | 2.43E-01 | 2                  | 3.35E-01 | 2                  | 3.35E-01 |
| ADARB2       | 10  | 2                  | 1.32E-01 | 2                  | 1.32E-01 | 2                  | 2.43E-01 | 2                  | 2.43E-01 | 3                  | 3.91E-01 | 3                  | 3.91E-01 |
| NRAP         | 10  | 8                  | 3.42E-01 | 11                 | 2.46E-01 | 7                  | 2.82E-01 | 10                 | 2.43E-01 | 2                  | 4.69E-01 | 5                  | 4.17E-01 |
| SNAI3        | 16  | 4                  | 7.52E-01 | 4                  | 7.52E-01 | 3                  | 2.43E-01 | 3                  | 2.43E-01 | 4                  | 4.58E-01 | 4                  | 4.58E-01 |
| OBSL1        | 2   | 8                  | 6.66E-01 | 8                  | 6.66E-01 | 6                  | 2.43E-01 | 6                  | 2.43E-01 | 3                  | 5.12E-01 | 3                  | 5.12E-01 |
| SPAG16       | 2   | 3                  | 1.09E-02 | 3                  | 1.09E-02 | 3                  | 2.43E-01 | 3                  | 2.43E-01 | 1                  | 1.00E+00 | 1                  | 1.00E+00 |
| DMXL1        | 5   | 6                  | 4.94E-01 | 6                  | 4.94E-01 | 6                  | 3.33E-01 | 6                  | 3.33E-01 | 3                  | 2.44E-01 | 3                  | 2.44E-01 |
| AOC1         | 7   | 5                  | 3.00E-01 | 5                  | 3.00E-01 | 4                  | 3.10E-01 | 4                  | 3.10E-01 | 3                  | 2.44E-01 | 3                  | 2.44E-01 |
| MMP20        | 11  | 4                  | 5.29E-01 | 4                  | 5.29E-01 | 4                  | 3.31E-01 | 4                  | 3.31E-01 | 2                  | 2.44E-01 | 2                  | 2.44E-01 |
| NRG2         | 5   | 6                  | 5.99E-01 | 6                  | 5.99E-01 | 5                  | 2.44E-01 | 5                  | 2.44E-01 | 6                  | 2.73E-01 | 6                  | 2.73E-01 |
| PDZRN4       | 12  | 4                  | 8.86E-01 | 4                  | 8.86E-01 | 4                  | 3.82E-01 | 4                  | 3.82E-01 | 3                  | 2.44E-01 | 3                  | 2.44E-01 |
| GPR152       | 11  | 2                  | 4.22E-01 | 2                  | 4.22E-01 | 2                  | 2.44E-01 | 2                  | 2.44E-01 | 2                  | 4.70E-01 | 2                  | 4.70E-01 |
| RTN4RL1      | 17  | 2                  | 4.07E-01 | 2                  | 4.07E-01 | 2                  | 2.44E-01 | 2                  | 2.44E-01 | 2                  | 4.28E-01 | 2                  | 4.28E-01 |
| CAPRN2       | 12  | 5                  | 1.47E-01 | 5                  | 1.47E-01 | 4                  | 2.44E-01 | 4                  | 2.44E-01 | 2                  | 4.80E-01 | 2                  | 4.80E-01 |
| RBM28        | 7   | 3                  | 1.24E-01 | 3                  | 1.24E-01 | 3                  | 2.44E-01 | 3                  | 2.44E-01 | 1                  | 6.28E-01 | 1                  | 6.28E-01 |
| NARF         | 17  | 3                  | 4.89E-01 | 3                  | 4.89E-01 | 2                  | 2.44E-01 | 2                  | 2.44E-01 | 2                  | 4.72E-01 | 2                  | 4.72E-01 |
| OGG1         | 3   | 3                  | 8.53E-01 | 3                  | 8.53E-01 | 3                  | 2.45E-01 | 3                  | 2.45E-01 | 3                  | 6.55E-01 | 3                  | 6.55E-01 |
| SCFD2        | 4   | 4                  | 3.99E-01 | 4                  | 3.99E-01 | 4                  | 2.45E-01 | 4                  | 2.45E-01 | 1                  | 2.78E-01 | 1                  | 2.78E-01 |
| CDC42BPG     | 11  | 9                  | 1.00E+00 | 9                  | 1.00E+00 | 8                  | 2.45E-01 | 8                  | 2.45E-01 | 5                  | 3.76E-01 | 5                  | 3.76E-01 |
| THADA        | 2   | 8                  | 1.00E+00 | 8                  | 1.00E+00 | 9                  | 2.45E-01 | 9                  | 2.45E-01 | 6                  | 3.66E-01 | 6                  | 3.66E-01 |

| SetID    | Chr | ADEH- vs NA        |          |                    |          | ADEH+ vs ADEH-     |          |                    |          | ADEH+ vs NA        |          |                    |          |
|----------|-----|--------------------|----------|--------------------|----------|--------------------|----------|--------------------|----------|--------------------|----------|--------------------|----------|
|          |     | rare novel         |          | all                |          | rare novel         |          | all                |          | rare novel         |          | all                |          |
|          |     | N variants in test | p-value  | N variants in test | p-value  | N variants in test | p-value  | N variants in test | p-value  | N variants in test | p-value  | N variants in test | p-value  |
| FAM63A   | 1   | 2                  | 7.53E-01 | 2                  | 7.53E-01 | 2                  | 2.45E-01 | 2                  | 2.45E-01 | 2                  | 4.06E-01 | 2                  | 4.06E-01 |
| C8orf44  | 8   | 1                  | 3.63E-01 | 1                  | 3.63E-01 | 1                  | 2.93E-01 | 1                  | 2.93E-01 | 1                  | 2.45E-01 | 1                  | 2.45E-01 |
| OMD      | 9   | 3                  | 9.59E-03 | 3                  | 9.59E-03 | 2                  | 6.79E-01 | 2                  | 6.79E-01 | 2                  | 2.45E-01 | 2                  | 2.45E-01 |
| FJX1     | 11  | 1                  | 7.03E-01 | 1                  | 7.03E-01 | 1                  | 4.71E-01 | 1                  | 4.71E-01 | 1                  | 2.45E-01 | 1                  | 2.45E-01 |
| POLG     | 15  | 6                  | 7.70E-01 | 6                  | 7.70E-01 | 5                  | 3.24E-01 | 5                  | 3.24E-01 | 4                  | 2.45E-01 | 4                  | 2.45E-01 |
| TTN      | 2   | 133                | 1.67E-01 | 137                | 1.86E-01 | 108                | 2.45E-01 | 112                | 2.52E-01 | 85                 | 3.95E-01 | 89                 | 3.99E-01 |
| KIAA1804 | 1   | 2                  | 3.20E-02 | 2                  | 3.20E-02 | 2                  | 2.45E-01 | 2                  | 2.45E-01 | 1                  | 1.00E+00 | 1                  | 1.00E+00 |
| CILP     | 15  | 8                  | 3.24E-01 | 8                  | 3.24E-01 | 6                  | 2.45E-01 | 6                  | 2.45E-01 | 4                  | 4.35E-01 | 4                  | 4.35E-01 |
| BBS12    | 4   | 2                  | 8.43E-01 | 2                  | 8.43E-01 | 2                  | 2.58E-01 | 2                  | 2.58E-01 | 1                  | 2.45E-01 | 1                  | 2.45E-01 |
| RRBP1    | 20  | 6                  | 1.61E-01 | 6                  | 1.61E-01 | 4                  | 4.77E-01 | 4                  | 4.77E-01 | 4                  | 2.45E-01 | 4                  | 2.45E-01 |
| FNDC7    | 1   | 6                  | 5.15E-01 | 6                  | 5.15E-01 | 4                  | 2.45E-01 | 4                  | 2.45E-01 | 3                  | 7.17E-01 | 3                  | 7.17E-01 |
| DENND3   | 8   | 6                  | 1.71E-01 | 6                  | 1.71E-01 | 4                  | 3.55E-01 | 4                  | 3.55E-01 | 4                  | 2.45E-01 | 4                  | 2.45E-01 |
| ZNF44    | 19  | 1                  | 4.54E-01 | 1                  | 4.54E-01 | 1                  | 2.45E-01 | 1                  | 2.45E-01 | 1                  | 3.21E-01 | 1                  | 3.21E-01 |
| LRP2     | 2   | 16                 | 1.56E-01 | 17                 | 1.56E-01 | 14                 | 2.71E-01 | 15                 | 2.71E-01 | 8                  | 2.45E-01 | 9                  | 2.45E-01 |
| ZNF138   | 7   | 2                  | 7.63E-01 | 2                  | 7.63E-01 | 2                  | 2.80E-01 | 2                  | 2.80E-01 | 2                  | 2.45E-01 | 2                  | 2.45E-01 |
| FMN2     | 1   | 3                  | 1.00E+00 | 3                  | 1.00E+00 | 3                  | 2.67E-01 | 3                  | 2.67E-01 | 2                  | 2.46E-01 | 2                  | 2.46E-01 |
| PGAM5    | 12  | 2                  | 5.61E-01 | 3                  | 1.68E-01 | 2                  | 6.23E-01 | 3                  | 1.00E+00 |                    |          | 1                  | 2.46E-01 |
| FUT10    | 8   | 7                  | 1.26E-01 | 7                  | 1.26E-01 | 6                  | 2.46E-01 | 6                  | 2.46E-01 | 2                  | 6.44E-01 | 2                  | 6.44E-01 |
| RASAL3   | 19  | 4                  | 2.74E-01 | 4                  | 2.74E-01 | 4                  | 2.46E-01 | 4                  | 2.46E-01 | 2                  | 4.03E-01 | 2                  | 4.03E-01 |
| MICALL2  | 7   | 9                  | 5.06E-01 | 9                  | 5.06E-01 | 7                  | 2.46E-01 | 7                  | 2.46E-01 | 7                  | 6.13E-01 | 7                  | 6.13E-01 |
| IGSF22   | 11  | 7                  | 6.59E-01 | 7                  | 6.59E-01 | 5                  | 3.78E-01 | 5                  | 3.78E-01 | 3                  | 2.46E-01 | 3                  | 2.46E-01 |
| CATSPERB | 14  | 2                  | 1.00E+00 | 2                  | 1.00E+00 | 2                  | 3.64E-01 | 2                  | 3.64E-01 | 1                  | 2.46E-01 | 1                  | 2.46E-01 |
| NOM1     | 7   | 4                  | 8.18E-01 | 5                  | 8.21E-01 | 4                  | 3.38E-01 | 5                  | 3.48E-01 | 1                  | 2.46E-01 | 2                  | 2.66E-01 |
| NUP153   | 6   | 2                  | 7.72E-01 | 2                  | 7.72E-01 | 1                  | 2.46E-01 | 1                  | 2.46E-01 | 2                  | 3.54E-01 | 2                  | 3.54E-01 |
| DCLRE1A  | 10  | 5                  | 8.12E-01 | 5                  | 8.12E-01 | 4                  | 3.01E-01 | 4                  | 3.01E-01 | 3                  | 2.47E-01 | 3                  | 2.47E-01 |
| ARMC2    | 6   | 5                  | 7.59E-01 | 5                  | 7.59E-01 | 5                  | 2.47E-01 | 5                  | 2.47E-01 | 2                  | 3.07E-01 | 2                  | 3.07E-01 |
| C7orf62  | 7   | 1                  | 4.05E-01 | 1                  | 4.05E-01 | 1                  | 2.47E-01 | 1                  | 2.47E-01 | 1                  | 4.43E-01 | 1                  | 4.43E-01 |
| ITPRIP   | 10  | 2                  | 1.16E-01 | 2                  | 1.16E-01 | 2                  | 2.47E-01 | 2                  | 2.47E-01 | 1                  | 6.34E-01 | 1                  | 6.34E-01 |
| BTN3A1   | 6   | 3                  | 3.71E-02 | 3                  | 3.71E-02 | 3                  | 6.17E-01 | 3                  | 6.17E-01 | 1                  | 2.47E-01 | 1                  | 2.47E-01 |
| OR2B11   | 1   |                    |          | 1                  | 2.37E-02 |                    |          | 1                  | 7.80E-01 |                    |          | 1                  | 2.47E-01 |
| FBLN7    | 2   | 3                  | 1.00E+00 | 3                  | 1.00E+00 | 3                  | 3.08E-01 | 3                  | 3.08E-01 | 1                  | 2.47E-01 | 1                  | 2.47E-01 |
| CNTLN    | 9   | 11                 | 7.45E-01 | 11                 | 7.45E-01 | 7                  | 2.47E-01 | 7                  | 2.47E-01 | 5                  | 2.61E-01 | 5                  | 2.61E-01 |
| CARS     | 11  | 5                  | 5.49E-01 | 5                  | 5.49E-01 | 6                  | 2.47E-01 | 6                  | 2.47E-01 | 3                  | 2.95E-01 | 3                  | 2.95E-01 |
| GPR20    | 8   | 4                  | 6.70E-01 | 4                  | 6.70E-01 | 4                  | 2.47E-01 | 4                  | 2.47E-01 | 2                  | 3.02E-01 | 2                  | 3.02E-01 |
| OR2D3    | 11  | 2                  | 8.16E-03 | 4                  | 8.15E-03 |                    |          | 2                  | 2.47E-01 | 2                  | 4.74E-01 | 4                  | 4.74E-01 |
| IDO2     | 8   | 3                  | 6.65E-01 | 6                  | 5.77E-01 | 2                  | 3.78E-01 | 5                  | 4.63E-01 | 2                  | 2.48E-01 | 5                  | 3.04E-01 |
| RECQL5   | 17  | 6                  | 6.59E-02 | 6                  | 6.59E-02 | 5                  | 4.13E-01 | 5                  | 4.13E-01 | 4                  | 2.48E-01 | 4                  | 2.48E-01 |
| RNASSET2 | 6   |                    |          | 1                  | 1.13E-01 |                    |          | 1                  | 2.48E-01 |                    |          | 1                  | 1.00E+00 |
| GRN      | 17  | 3                  | 5.23E-01 | 3                  | 5.23E-01 | 2                  | 2.48E-01 | 2                  | 2.48E-01 | 2                  | 5.27E-01 | 2                  | 5.27E-01 |
| NFE2L2   | 2   | 1                  | 5.76E-02 | 1                  | 5.76E-02 | 1                  | 2.48E-01 | 1                  | 2.48E-01 |                    |          |                    |          |
| SETX     | 9   | 8                  | 1.79E-01 | 8                  | 1.79E-01 | 6                  | 3.36E-01 | 6                  | 3.36E-01 | 3                  | 2.48E-01 | 3                  | 2.48E-01 |
| KIF21A   | 12  | 2                  | 7.19E-01 | 2                  | 7.19E-01 | 1                  | 2.48E-01 | 1                  | 2.48E-01 | 2                  | 6.05E-01 | 2                  | 6.05E-01 |
| ANXA4    | 2   | 5                  | 5.15E-01 | 5                  | 5.15E-01 | 4                  | 2.48E-01 | 4                  | 2.48E-01 | 2                  | 3.40E-01 | 2                  | 3.40E-01 |
| PCDHB3   | 5   | 2                  | 6.13E-01 | 3                  | 6.14E-01 | 2                  | 4.14E-01 | 3                  | 4.48E-01 | 1                  | 2.48E-01 | 2                  | 2.52E-01 |
| SHBG     | 17  | 1                  | 2.20E-01 | 1                  | 2.20E-01 | 1                  | 2.48E-01 | 1                  | 2.48E-01 | 1                  | 6.04E-01 | 1                  | 6.04E-01 |
| PIGR     | 1   | 4                  | 2.05E-01 | 4                  | 2.05E-01 | 3                  | 4.74E-01 | 3                  | 4.74E-01 | 3                  | 2.48E-01 | 3                  | 2.48E-01 |
| NUDT19   | 19  | 6                  | 3.36E-01 | 6                  | 3.36E-01 | 5                  | 2.49E-01 | 5                  | 2.49E-01 | 2                  | 2.59E-01 | 2                  | 2.59E-01 |
| MDC1     | 6   | 6                  | 7.30E-01 | 6                  | 7.30E-01 | 6                  | 2.77E-01 | 6                  | 2.77E-01 | 4                  | 2.49E-01 | 4                  | 2.49E-01 |

| SetID       | Chr | ADEH- vs NA        |          |                    |          | ADEH+ vs ADEH-     |          |                    |          | ADEH+ vs NA        |          |                    |          |
|-------------|-----|--------------------|----------|--------------------|----------|--------------------|----------|--------------------|----------|--------------------|----------|--------------------|----------|
|             |     | rare novel         |          | all                |          | rare novel         |          | all                |          | rare novel         |          | all                |          |
|             |     | N variants in test | p-value  | N variants in test | p-value  | N variants in test | p-value  | N variants in test | p-value  | N variants in test | p-value  | N variants in test | p-value  |
| SH3D21      | 1   | 2                  | 4.77E-01 | 2                  | 4.77E-01 | 1                  | 2.49E-01 | 1                  | 2.49E-01 | 2                  | 2.96E-01 | 2                  | 2.96E-01 |
| CCT6B       | 17  | 1                  | 1.89E-01 | 2                  | 1.77E-01 | 1                  | 1.00E+00 | 2                  | 1.00E+00 | 1                  | 2.49E-01 | 2                  | 2.49E-01 |
| CHAF1B      | 21  | 3                  | 5.65E-01 | 3                  | 5.65E-01 | 2                  | 2.49E-01 | 2                  | 2.49E-01 | 2                  | 2.97E-01 | 2                  | 2.97E-01 |
| CXCL10      | 4   | 1                  | 5.02E-01 | 1                  | 5.02E-01 | 1                  | 2.98E-01 | 1                  | 2.98E-01 | 1                  | 2.49E-01 | 1                  | 2.49E-01 |
| FAM149A     | 4   | 2                  | 8.51E-01 | 2                  | 8.51E-01 | 2                  | 2.49E-01 | 2                  | 2.49E-01 | 2                  | 3.88E-01 | 2                  | 3.88E-01 |
| PLTP        | 20  | 3                  | 7.23E-01 | 3                  | 7.23E-01 | 2                  | 2.49E-01 | 2                  | 2.49E-01 | 2                  | 6.52E-01 | 2                  | 6.52E-01 |
| KRT75       | 12  | 6                  | 1.00E+00 | 7                  | 1.00E+00 | 5                  | 2.50E-01 | 6                  | 2.80E-01 | 4                  | 2.63E-01 | 5                  | 2.67E-01 |
| BMP10       | 2   | 2                  | 6.73E-01 | 2                  | 6.73E-01 | 2                  | 2.50E-01 | 2                  | 2.50E-01 | 1                  | 2.69E-01 | 1                  | 2.69E-01 |
| HKDC1       | 10  | 7                  | 4.89E-01 | 7                  | 4.89E-01 | 8                  | 2.50E-01 | 8                  | 2.50E-01 | 4                  | 4.81E-01 | 4                  | 4.81E-01 |
| TMPRSS6     | 22  | 2                  | 7.80E-01 | 2                  | 7.80E-01 | 2                  | 2.60E-01 | 2                  | 2.60E-01 | 1                  | 2.50E-01 | 1                  | 2.50E-01 |
| CCDC40      | 17  | 6                  | 2.38E-01 | 6                  | 2.38E-01 | 5                  | 3.67E-01 | 5                  | 3.67E-01 | 6                  | 2.50E-01 | 6                  | 2.50E-01 |
| LCTL        | 15  | 6                  | 6.91E-01 | 6                  | 6.91E-01 | 7                  | 4.59E-01 | 7                  | 4.59E-01 | 3                  | 2.50E-01 | 3                  | 2.50E-01 |
| CPNE3       | 8   | 3                  | 6.86E-01 | 3                  | 6.86E-01 | 2                  | 3.05E-01 | 2                  | 3.05E-01 | 2                  | 2.50E-01 | 2                  | 2.50E-01 |
| ECM2        | 9   | 4                  | 8.37E-01 | 4                  | 8.37E-01 | 4                  | 2.50E-01 | 4                  | 2.50E-01 | 4                  | 3.61E-01 | 4                  | 3.61E-01 |
| TMEM134     | 11  | 1                  | 7.14E-01 | 1                  | 7.14E-01 | 1                  | 2.50E-01 | 1                  | 2.50E-01 | 1                  | 3.22E-01 | 1                  | 3.22E-01 |
| ASXL2       | 2   | 5                  | 8.84E-01 | 5                  | 8.84E-01 | 5                  | 2.73E-01 | 5                  | 2.73E-01 | 3                  | 2.50E-01 | 3                  | 2.50E-01 |
| SEC16A      | 9   | 10                 | 7.68E-01 | 10                 | 7.68E-01 | 7                  | 2.50E-01 | 7                  | 2.50E-01 | 5                  | 3.99E-01 | 5                  | 3.99E-01 |
| ADGRF5      | 6   | 3                  | 2.22E-01 | 3                  | 2.22E-01 | 2                  | 1.00E+00 | 2                  | 1.00E+00 | 2                  | 2.51E-01 | 2                  | 2.51E-01 |
| PLAU        | 10  | 3                  | 2.78E-02 | 3                  | 2.78E-02 | 3                  | 7.53E-01 | 3                  | 7.53E-01 | 1                  | 2.51E-01 | 1                  | 2.51E-01 |
| TYRP1       | 9   | 6                  | 9.96E-02 | 6                  | 9.96E-02 | 3                  | 3.85E-01 | 3                  | 3.85E-01 | 4                  | 2.51E-01 | 4                  | 2.51E-01 |
| GPRIN1      | 5   | 3                  | 3.59E-01 | 3                  | 3.59E-01 | 3                  | 4.10E-01 | 3                  | 4.10E-01 | 1                  | 2.51E-01 | 1                  | 2.51E-01 |
| PIK3C2B     | 1   | 4                  | 7.95E-02 | 5                  | 1.68E-01 | 3                  | 5.68E-01 | 4                  | 6.30E-01 | 3                  | 2.51E-01 | 4                  | 6.47E-01 |
| RLTPR       | 16  | 10                 | 7.38E-01 | 10                 | 7.38E-01 | 7                  | 5.34E-01 | 7                  | 5.34E-01 | 7                  | 2.51E-01 | 7                  | 2.51E-01 |
| MAP4        | 3   | 7                  | 1.38E-01 | 8                  | 3.84E-01 | 4                  | 3.87E-01 | 5                  | 4.45E-01 | 5                  | 2.51E-01 | 6                  | 3.67E-01 |
| C14orf159   | 14  | 4                  | 6.65E-01 | 4                  | 6.65E-01 | 4                  | 2.51E-01 | 4                  | 2.51E-01 | 3                  | 2.88E-01 | 3                  | 2.88E-01 |
| CKAP2L      | 2   | 3                  | 5.78E-01 | 4                  | 6.92E-01 | 3                  | 2.51E-01 | 4                  | 4.84E-01 | 1                  | 5.30E-01 | 2                  | 6.91E-01 |
| RIC8B       | 12  | 3                  | 5.55E-01 | 3                  | 5.55E-01 | 3                  | 2.78E-01 | 3                  | 2.78E-01 | 1                  | 2.51E-01 | 1                  | 2.51E-01 |
| OR7A5       | 19  | 2                  | 2.99E-01 | 2                  | 2.99E-01 | 2                  | 2.51E-01 | 2                  | 2.51E-01 | 1                  | 1.00E+00 | 1                  | 1.00E+00 |
| OXR1        | 8   | 4                  | 3.04E-02 | 4                  | 3.04E-02 | 1                  | 4.35E-01 | 1                  | 4.35E-01 | 4                  | 2.52E-01 | 4                  | 2.52E-01 |
| SERTAD4     | 1   | 2                  | 3.93E-01 | 2                  | 3.93E-01 | 2                  | 2.52E-01 | 2                  | 2.52E-01 | 2                  | 4.73E-01 | 2                  | 4.73E-01 |
| MYO9B       | 19  | 7                  | 3.19E-01 | 7                  | 3.19E-01 | 6                  | 3.06E-01 | 6                  | 3.06E-01 | 4                  | 2.52E-01 | 4                  | 2.52E-01 |
| FAM166A     | 9   | 2                  | 4.53E-01 | 2                  | 4.53E-01 | 2                  | 2.52E-01 | 2                  | 2.52E-01 | 2                  | 2.69E-01 | 2                  | 2.69E-01 |
| SMG6        | 17  | 4                  | 2.24E-01 | 5                  | 2.24E-01 | 4                  | 5.80E-01 | 5                  | 5.79E-01 |                    |          | 1                  | 2.52E-01 |
| ERCC6L2     | 9   | 3                  | 3.11E-01 | 4                  | 5.75E-01 | 3                  | 5.80E-01 | 4                  | 5.55E-01 |                    |          | 1                  | 2.52E-01 |
| NT5C1B-RDH1 | 2   | 6                  | 1.00E+00 | 6                  | 1.00E+00 | 5                  | 2.88E-01 | 5                  | 2.88E-01 | 4                  | 2.52E-01 | 4                  | 2.52E-01 |
| NT5C1B      | 2   | 6                  | 1.00E+00 | 6                  | 1.00E+00 | 5                  | 2.88E-01 | 5                  | 2.88E-01 | 4                  | 2.52E-01 | 4                  | 2.52E-01 |
| TSHZ2       | 20  | 4                  | 5.55E-01 | 4                  | 5.55E-01 | 3                  | 3.36E-01 | 3                  | 3.36E-01 | 3                  | 2.52E-01 | 3                  | 2.52E-01 |
| TACC2       | 10  | 6                  | 6.87E-01 | 6                  | 6.87E-01 | 5                  | 2.52E-01 | 5                  | 2.52E-01 | 5                  | 3.36E-01 | 5                  | 3.36E-01 |
| ACSM1       | 16  | 6                  | 1.10E-01 | 6                  | 1.10E-01 | 3                  | 6.04E-01 | 3                  | 6.04E-01 | 6                  | 2.52E-01 | 6                  | 2.52E-01 |
| PDHA2       | 4   | 6                  | 2.65E-01 | 6                  | 2.65E-01 | 4                  | 2.52E-01 | 4                  | 2.52E-01 | 5                  | 4.25E-01 | 5                  | 4.25E-01 |
| MCM9        | 6   | 3                  | 8.60E-01 | 3                  | 8.60E-01 | 4                  | 2.53E-01 | 4                  | 2.53E-01 | 3                  | 3.13E-01 | 3                  | 3.13E-01 |
| DRC1        | 2   | 6                  | 1.49E-01 | 7                  | 2.84E-01 | 5                  | 3.67E-01 | 6                  | 8.67E-01 | 3                  | 2.53E-01 | 4                  | 5.83E-01 |
| LRRC71      | 1   | 2                  | 2.35E-01 | 3                  | 2.35E-01 | 2                  | 4.47E-01 | 3                  | 4.87E-01 | 1                  | 2.53E-01 | 2                  | 2.75E-01 |
| SSH2        | 17  | 5                  | 1.99E-01 | 5                  | 1.99E-01 | 4                  | 2.53E-01 | 4                  | 2.53E-01 | 3                  | 6.35E-01 | 3                  | 6.35E-01 |
| FAM184B     | 4   | 3                  | 5.10E-01 | 3                  | 5.10E-01 | 3                  | 3.44E-01 | 3                  | 3.44E-01 | 1                  | 2.53E-01 | 1                  | 2.53E-01 |
| SKA3        | 13  | 1                  | 4.78E-02 | 1                  | 4.78E-02 | 1                  | 2.53E-01 | 1                  | 2.53E-01 |                    |          |                    |          |
| 10-Sep      | 2   | 5                  | 1.00E+00 | 5                  | 1.00E+00 | 4                  | 2.58E-01 | 4                  | 2.58E-01 | 2                  | 2.53E-01 | 2                  | 2.53E-01 |
| USP45       | 6   | 5                  | 4.19E-01 | 5                  | 4.19E-01 | 4                  | 2.53E-01 | 4                  | 2.53E-01 | 3                  | 2.84E-01 | 3                  | 2.84E-01 |

| SetID        | Chr | ADEH- vs NA        |          |                    |          | ADEH+ vs ADEH-     |          |                    |          | ADEH+ vs NA        |          |                    |          |
|--------------|-----|--------------------|----------|--------------------|----------|--------------------|----------|--------------------|----------|--------------------|----------|--------------------|----------|
|              |     | rarenovel          |          | all                |          | rarenovel          |          | all                |          | rarenovel          |          | all                |          |
|              |     | N variants in test | p-value  | N variants in test | p-value  | N variants in test | p-value  | N variants in test | p-value  | N variants in test | p-value  | N variants in test | p-value  |
| MCC          | 5   | 7                  | 6.22E-01 | 7                  | 6.22E-01 | 6                  | 2.55E-01 | 6                  | 2.55E-01 | 2                  | 2.53E-01 | 2                  | 2.53E-01 |
| C15orf52     | 15  | 3                  | 1.49E-01 | 3                  | 1.49E-01 | 2                  | 5.40E-01 | 2                  | 5.40E-01 | 2                  | 2.53E-01 | 2                  | 2.53E-01 |
| SEMA3D       | 7   | 3                  | 3.07E-01 | 3                  | 3.07E-01 | 3                  | 2.53E-01 | 3                  | 2.53E-01 | 1                  | 3.37E-01 | 1                  | 3.37E-01 |
| ITSN1        | 21  | 3                  | 8.13E-01 | 4                  | 8.71E-01 | 2                  | 2.54E-01 | 3                  | 4.60E-01 | 2                  | 3.78E-01 | 3                  | 5.47E-01 |
| PGBD5        | 1   | 1                  | 5.92E-01 | 1                  | 5.92E-01 | 1                  | 2.95E-01 | 1                  | 2.95E-01 | 1                  | 2.54E-01 | 1                  | 2.54E-01 |
| OR8D1        | 11  | 3                  | 3.41E-01 | 5                  | 3.41E-01 | 4                  | 2.55E-01 | 6                  | 2.55E-01 | 3                  | 2.54E-01 | 5                  | 2.54E-01 |
| DOPEY2       | 21  | 10                 | 7.06E-01 | 11                 | 6.79E-01 | 8                  | 2.65E-01 | 9                  | 2.54E-01 | 5                  | 4.79E-01 | 6                  | 4.84E-01 |
| ZNF154       | 19  | 2                  | 5.50E-02 | 2                  | 5.50E-02 | 2                  | 2.54E-01 | 2                  | 2.54E-01 | 1                  | 6.28E-01 | 1                  | 6.28E-01 |
| ARAP2        | 4   | 4                  | 8.85E-01 | 4                  | 8.85E-01 | 4                  | 2.54E-01 | 4                  | 2.54E-01 | 3                  | 3.17E-01 | 3                  | 3.17E-01 |
| C4orf45      | 4   | 1                  | 8.24E-01 | 1                  | 8.24E-01 | 1                  | 2.54E-01 | 1                  | 2.54E-01 | 1                  | 2.66E-01 | 1                  | 2.66E-01 |
| HYAL3        | 3   | 3                  | 2.42E-01 | 3                  | 2.42E-01 | 3                  | 5.43E-01 | 3                  | 5.43E-01 | 1                  | 2.55E-01 | 1                  | 2.55E-01 |
| LOC100130451 | 2   |                    |          | 1                  | 4.92E-01 |                    |          | 1                  | 2.55E-01 |                    |          | 1                  | 4.33E-01 |
| TTC21B       | 2   | 9                  | 3.49E-01 | 10                 | 3.49E-01 | 5                  | 2.60E-01 | 6                  | 2.60E-01 | 5                  | 2.55E-01 | 6                  | 2.55E-01 |
| PAPPA        | 9   | 4                  | 2.56E-01 | 4                  | 2.56E-01 | 3                  | 3.57E-01 | 3                  | 3.57E-01 | 2                  | 2.55E-01 | 2                  | 2.55E-01 |
| ZNF644       | 1   | 3                  | 1.00E+00 | 3                  | 1.00E+00 | 3                  | 2.55E-01 | 3                  | 2.55E-01 | 2                  | 3.72E-01 | 2                  | 3.72E-01 |
| IGFL1        | 19  | 2                  | 8.03E-01 | 2                  | 8.03E-01 | 2                  | 2.55E-01 | 2                  | 2.55E-01 | 1                  | 2.64E-01 | 1                  | 2.64E-01 |
| ANGEL1       | 14  | 2                  | 2.97E-01 | 4                  | 4.32E-01 | 1                  | 2.55E-01 | 3                  | 4.68E-01 | 2                  | 6.40E-01 | 4                  | 1.00E+00 |
| CDT1         | 16  | 3                  | 1.00E+00 | 3                  | 1.00E+00 | 3                  | 2.56E-01 | 3                  | 2.56E-01 | 2                  | 3.44E-01 | 2                  | 3.44E-01 |
| TMPRSS4      | 11  | 3                  | 3.01E-01 | 3                  | 3.01E-01 | 4                  | 2.56E-01 | 4                  | 2.56E-01 | 3                  | 2.97E-01 | 3                  | 2.97E-01 |
| KIAA1683     | 19  | 6                  | 4.68E-01 | 6                  | 4.68E-01 | 4                  | 3.84E-01 | 4                  | 3.84E-01 | 3                  | 2.56E-01 | 3                  | 2.56E-01 |
| C20orf194    | 20  | 2                  | 4.74E-01 | 2                  | 4.74E-01 | 2                  | 4.04E-01 | 2                  | 4.04E-01 | 1                  | 2.56E-01 | 1                  | 2.56E-01 |
| NOB1         | 16  | 4                  | 1.00E+00 | 4                  | 1.00E+00 | 3                  | 2.56E-01 | 3                  | 2.56E-01 | 3                  | 2.67E-01 | 3                  | 2.67E-01 |
| ESPNL        | 2   | 12                 | 5.81E-01 | 12                 | 5.81E-01 | 9                  | 6.47E-01 | 9                  | 6.47E-01 | 8                  | 2.56E-01 | 8                  | 2.56E-01 |
| SH2D7        | 15  | 1                  | 7.81E-02 | 1                  | 7.81E-02 | 1                  | 2.56E-01 | 1                  | 2.56E-01 |                    |          |                    |          |
| LPA          | 6   | 4                  | 1.00E+00 | 5                  | 1.00E+00 | 4                  | 2.56E-01 | 5                  | 2.57E-01 | 3                  | 3.35E-01 | 4                  | 3.35E-01 |
| ANKS1B       | 12  | 1                  | 5.56E-01 | 1                  | 5.56E-01 | 1                  | 3.53E-01 | 1                  | 3.53E-01 | 1                  | 2.57E-01 | 1                  | 2.57E-01 |
| ZNF117       | 7   | 2                  | 6.63E-01 | 2                  | 6.63E-01 | 2                  | 6.28E-01 | 2                  | 6.28E-01 | 1                  | 2.57E-01 | 1                  | 2.57E-01 |
| LRGUK        | 7   | 11                 | 8.45E-01 | 11                 | 8.45E-01 | 10                 | 2.57E-01 | 10                 | 2.57E-01 | 7                  | 2.75E-01 | 7                  | 2.75E-01 |
| C10orf53     | 10  | 2                  | 5.24E-01 | 2                  | 5.24E-01 | 1                  | 2.57E-01 | 1                  | 2.57E-01 | 2                  | 3.86E-01 | 2                  | 3.86E-01 |
| LGALS3       | 14  | 2                  | 1.00E+00 | 3                  | 1.00E+00 | 2                  | 5.92E-01 | 3                  | 2.57E-01 | 1                  | 6.43E-01 | 2                  | 6.13E-01 |
| DHX37        | 12  | 8                  | 1.00E+00 | 8                  | 1.00E+00 | 8                  | 2.57E-01 | 8                  | 2.57E-01 | 5                  | 2.76E-01 | 5                  | 2.76E-01 |
| TSC1         | 9   | 3                  | 8.11E-01 | 3                  | 8.11E-01 | 3                  | 3.51E-01 | 3                  | 3.51E-01 | 1                  | 2.57E-01 | 1                  | 2.57E-01 |
| ACAD9        | 3   | 4                  | 6.05E-01 | 4                  | 6.05E-01 | 3                  | 2.58E-01 | 3                  | 2.58E-01 | 2                  | 4.85E-01 | 2                  | 4.85E-01 |
| PSMB11       | 14  | 4                  | 4.62E-01 | 4                  | 4.62E-01 | 4                  | 2.59E-01 | 4                  | 2.59E-01 | 1                  | 2.58E-01 | 1                  | 2.58E-01 |
| ZNF653       | 19  | 2                  | 2.20E-01 | 2                  | 2.20E-01 | 2                  | 1.00E+00 | 2                  | 1.00E+00 | 1                  | 2.58E-01 | 1                  | 2.58E-01 |
| APIP         | 11  | 2                  | 9.30E-02 | 2                  | 9.30E-02 | 2                  | 6.88E-01 | 2                  | 6.88E-01 | 1                  | 2.58E-01 | 1                  | 2.58E-01 |
| AQP8         | 16  | 3                  | 3.04E-01 | 3                  | 3.04E-01 | 2                  | 1.00E+00 | 2                  | 1.00E+00 | 2                  | 2.58E-01 | 2                  | 2.58E-01 |
| TRIB3        | 20  | 2                  | 1.16E-01 | 2                  | 1.16E-01 | 1                  | 2.58E-01 | 1                  | 2.58E-01 | 2                  | 2.74E-01 | 2                  | 2.74E-01 |
| UBQLN1       | 9   | 1                  | 5.43E-01 | 1                  | 5.43E-01 | 1                  | 2.58E-01 | 1                  | 2.58E-01 | 1                  | 4.41E-01 | 1                  | 4.41E-01 |
| CYP2C8       | 10  | 3                  | 8.13E-02 | 3                  | 8.13E-02 | 3                  | 5.71E-01 | 3                  | 5.71E-01 | 2                  | 2.59E-01 | 2                  | 2.59E-01 |
| KRT5         | 12  |                    |          | 1                  | 2.51E-01 |                    |          | 1                  | 5.06E-01 |                    |          | 1                  | 2.59E-01 |
| RAB11FIP2    | 10  | 3                  | 4.53E-01 | 3                  | 4.53E-01 | 3                  | 3.94E-01 | 3                  | 3.94E-01 | 2                  | 2.59E-01 | 2                  | 2.59E-01 |
| BDKRB1       | 14  | 3                  | 4.14E-01 | 3                  | 4.14E-01 | 4                  | 2.59E-01 | 4                  | 2.59E-01 | 3                  | 3.43E-01 | 3                  | 3.43E-01 |
| WBP11        | 12  | 2                  | 1.00E+00 | 2                  | 1.00E+00 | 2                  | 3.21E-01 | 2                  | 3.21E-01 | 1                  | 2.59E-01 | 1                  | 2.59E-01 |
| ADGRA2       | 8   | 5                  | 3.08E-01 | 5                  | 3.08E-01 | 4                  | 2.98E-01 | 4                  | 2.98E-01 | 2                  | 2.59E-01 | 2                  | 2.59E-01 |
| LMO7         | 13  | 8                  | 1.00E+00 | 10                 | 1.00E+00 | 6                  | 2.59E-01 | 8                  | 5.26E-01 | 4                  | 3.09E-01 | 6                  | 6.45E-01 |
| HEATR5A      | 14  | 8                  | 6.48E-02 | 8                  | 6.48E-02 | 4                  | 3.91E-01 | 4                  | 3.91E-01 | 6                  | 2.59E-01 | 6                  | 2.59E-01 |
| CLRN3        | 10  | 1                  | 6.93E-01 | 2                  | 8.79E-01 | 1                  | 6.86E-01 | 2                  | 4.01E-01 |                    |          | 1                  | 2.59E-01 |



| SetID    | Chr | ADEH- vs NA        |          |                    |          | ADEH+ vs ADEH-     |          |                    |          | ADEH+ vs NA        |          |                    |          |
|----------|-----|--------------------|----------|--------------------|----------|--------------------|----------|--------------------|----------|--------------------|----------|--------------------|----------|
|          |     | rarenovel          |          | all                |          | rarenovel          |          | all                |          | rarenovel          |          | all                |          |
|          |     | N variants in test | p-value  | N variants in test | p-value  | N variants in test | p-value  | N variants in test | p-value  | N variants in test | p-value  | N variants in test | p-value  |
| DCAKD    | 17  | 3                  | 2.23E-01 | 3                  | 2.23E-01 | 3                  | 2.59E-01 | 3                  | 2.59E-01 | 1                  | 4.58E-01 | 1                  | 4.58E-01 |
| SYPL2    | 1   | 2                  | 2.12E-01 | 2                  | 2.12E-01 | 2                  | 1.00E+00 | 2                  | 1.00E+00 | 1                  | 2.60E-01 | 1                  | 2.60E-01 |
| INCENP   | 11  | 8                  | 3.63E-01 | 8                  | 3.63E-01 | 7                  | 3.47E-01 | 7                  | 3.47E-01 | 4                  | 2.60E-01 | 4                  | 2.60E-01 |
| SI       | 3   | 11                 | 9.11E-01 | 11                 | 9.11E-01 | 13                 | 2.72E-01 | 13                 | 2.72E-01 | 8                  | 2.60E-01 | 8                  | 2.60E-01 |
| PREX2    | 8   | 8                  | 3.43E-01 | 8                  | 3.43E-01 | 7                  | 2.60E-01 | 7                  | 2.60E-01 | 3                  | 3.46E-01 | 3                  | 3.46E-01 |
| ARRDC4   | 15  | 1                  | 2.90E-01 | 1                  | 2.90E-01 | 1                  | 1.00E+00 | 1                  | 1.00E+00 | 1                  | 2.60E-01 | 1                  | 2.60E-01 |
| CNGB3    | 8   | 7                  | 1.36E-01 | 7                  | 1.36E-01 | 3                  | 2.60E-01 | 3                  | 2.60E-01 | 5                  | 6.20E-01 | 5                  | 6.20E-01 |
| HIF3A    | 19  | 5                  | 2.09E-01 | 5                  | 2.09E-01 | 3                  | 3.95E-01 | 3                  | 3.95E-01 | 4                  | 2.60E-01 | 4                  | 2.60E-01 |
| PCDHA3   | 5   | 5                  | 5.46E-01 | 5                  | 5.46E-01 | 4                  | 2.61E-01 | 4                  | 2.61E-01 | 4                  | 4.45E-01 | 4                  | 4.45E-01 |
| EFCAB13  | 17  | 3                  | 4.82E-01 | 6                  | 7.61E-01 | 3                  | 5.72E-01 | 6                  | 6.48E-01 | 2                  | 2.61E-01 | 5                  | 6.05E-01 |
| PAPLN    | 14  | 9                  | 2.96E-02 | 10                 | 3.05E-02 | 7                  | 8.83E-01 | 8                  | 8.81E-01 | 7                  | 2.86E-01 | 8                  | 2.61E-01 |
| ALS2     | 2   | 5                  | 9.25E-01 | 5                  | 9.25E-01 | 5                  | 2.61E-01 | 5                  | 2.61E-01 | 3                  | 2.73E-01 | 3                  | 2.73E-01 |
| ALDH5A1  | 6   | 5                  | 5.70E-01 | 5                  | 5.70E-01 | 3                  | 2.61E-01 | 3                  | 2.61E-01 | 4                  | 4.46E-01 | 4                  | 4.46E-01 |
| REC8     | 14  | 2                  | 2.09E-01 | 2                  | 2.09E-01 | 2                  | 2.61E-01 | 2                  | 2.61E-01 | 1                  | 1.00E+00 | 1                  | 1.00E+00 |
| ESR2     | 14  | 4                  | 6.27E-01 | 4                  | 6.27E-01 | 4                  | 2.91E-01 | 4                  | 2.91E-01 | 3                  | 2.61E-01 | 3                  | 2.61E-01 |
| C1S      | 12  | 1                  | 1.52E-01 | 1                  | 1.52E-01 | 1                  | 1.00E+00 | 1                  | 1.00E+00 | 1                  | 2.61E-01 | 1                  | 2.61E-01 |
| TTC21A   | 3   | 3                  | 1.00E+00 | 4                  | 7.39E-01 | 4                  | 3.74E-01 | 5                  | 4.36E-01 | 2                  | 3.21E-01 | 3                  | 2.61E-01 |
| MOCOS2   | 5   | 4                  | 6.16E-01 | 4                  | 6.16E-01 | 4                  | 2.62E-01 | 4                  | 2.62E-01 | 2                  | 5.10E-01 | 2                  | 5.10E-01 |
| BBS5     | 2   | 1                  | 2.85E-01 | 1                  | 2.85E-01 | 1                  | 2.62E-01 | 1                  | 2.62E-01 | 1                  | 6.26E-01 | 1                  | 6.26E-01 |
| CFAP77   | 9   | 5                  | 4.88E-01 | 6                  | 3.47E-01 | 5                  | 2.69E-01 | 6                  | 3.09E-01 | 3                  | 2.62E-01 | 4                  | 2.91E-01 |
| PHLDA3   | 1   | 1                  | 7.47E-01 | 2                  | 8.34E-01 | 1                  | 4.69E-01 | 2                  | 3.89E-01 |                    |          | 1                  | 2.62E-01 |
| AKR7A2   | 1   |                    |          | 1                  | 1.00E+00 |                    |          | 1                  | 2.91E-01 |                    |          | 1                  | 2.62E-01 |
| LAMB2    | 3   | 8                  | 2.21E-01 | 8                  | 2.21E-01 | 5                  | 2.62E-01 | 5                  | 2.62E-01 | 6                  | 6.20E-01 | 6                  | 6.20E-01 |
| KRT3     | 12  | 1                  | 7.59E-01 | 3                  | 8.30E-01 | 1                  | 4.87E-01 | 3                  | 5.47E-01 |                    |          | 2                  | 2.62E-01 |
| NLRC3    | 16  | 3                  | 1.00E+00 | 3                  | 1.00E+00 | 4                  | 2.62E-01 | 4                  | 2.62E-01 | 3                  | 3.10E-01 | 3                  | 3.10E-01 |
| MYOM1    | 18  | 9                  | 6.88E-01 | 9                  | 6.88E-01 | 5                  | 2.62E-01 | 5                  | 2.62E-01 | 5                  | 3.25E-01 | 5                  | 3.25E-01 |
| DAAM2    | 6   | 10                 | 4.89E-01 | 10                 | 4.89E-01 | 8                  | 2.64E-01 | 8                  | 2.64E-01 | 4                  | 2.63E-01 | 4                  | 2.63E-01 |
| NFRKB    | 11  | 5                  | 4.18E-01 | 5                  | 4.18E-01 | 3                  | 2.63E-01 | 3                  | 2.63E-01 | 3                  | 3.07E-01 | 3                  | 3.07E-01 |
| CHAC2    | 2   | 2                  | 2.07E-01 | 2                  | 2.07E-01 | 2                  | 1.00E+00 | 2                  | 1.00E+00 | 1                  | 2.63E-01 | 1                  | 2.63E-01 |
| MC5R     | 18  | 4                  | 7.41E-01 | 5                  | 7.41E-01 | 3                  | 3.08E-01 | 4                  | 3.16E-01 | 2                  | 2.63E-01 | 3                  | 2.70E-01 |
| NXNL1    | 19  | 3                  | 8.15E-01 | 4                  | 7.62E-01 | 3                  | 2.63E-01 | 4                  | 2.85E-01 | 3                  | 3.12E-01 | 4                  | 3.85E-01 |
| DRAXIN   | 1   | 2                  | 4.31E-01 | 2                  | 4.31E-01 | 2                  | 6.75E-01 | 2                  | 6.75E-01 | 1                  | 2.63E-01 | 1                  | 2.63E-01 |
| NDUFA5   | 7   | 1                  | 1.74E-01 | 1                  | 1.74E-01 | 1                  | 2.63E-01 | 1                  | 2.63E-01 | 1                  | 6.34E-01 | 1                  | 6.34E-01 |
| PKP1     | 1   | 6                  | 5.40E-01 | 6                  | 5.40E-01 | 5                  | 4.46E-01 | 5                  | 4.46E-01 | 3                  | 2.63E-01 | 3                  | 2.63E-01 |
| SNX25    | 4   | 5                  | 7.74E-01 | 5                  | 7.74E-01 | 4                  | 2.64E-01 | 4                  | 2.64E-01 | 3                  | 5.09E-01 | 3                  | 5.09E-01 |
| CMTM5    | 14  | 1                  | 8.43E-02 | 1                  | 8.43E-02 | 1                  | 2.64E-01 | 1                  | 2.64E-01 |                    |          |                    |          |
| SAG      | 2   | 3                  | 2.21E-01 | 3                  | 2.21E-01 | 3                  | 2.64E-01 | 3                  | 2.64E-01 | 1                  | 4.47E-01 | 1                  | 4.47E-01 |
| PRRC2A   | 6   | 10                 | 2.95E-01 | 11                 | 2.95E-01 | 9                  | 2.93E-01 | 10                 | 2.81E-01 | 4                  | 2.81E-01 | 5                  | 2.64E-01 |
| XIRP2    | 2   | 17                 | 7.45E-01 | 18                 | 7.50E-01 | 13                 | 2.64E-01 | 14                 | 2.83E-01 | 7                  | 3.31E-01 | 8                  | 4.15E-01 |
| ACAD10   | 12  | 10                 | 3.45E-02 | 10                 | 3.45E-02 | 6                  | 4.77E-01 | 6                  | 4.77E-01 | 6                  | 2.65E-01 | 6                  | 2.65E-01 |
| SCNN1B   | 16  | 3                  | 6.27E-01 | 3                  | 6.27E-01 | 1                  | 2.65E-01 | 1                  | 2.65E-01 | 3                  | 6.39E-01 | 3                  | 6.39E-01 |
| BRCA2    | 13  | 15                 | 8.32E-01 | 15                 | 8.32E-01 | 12                 | 2.65E-01 | 12                 | 2.65E-01 | 8                  | 4.16E-01 | 8                  | 4.16E-01 |
| TMCO4    | 1   | 3                  | 3.65E-01 | 3                  | 3.65E-01 | 3                  | 2.65E-01 | 3                  | 2.65E-01 | 1                  | 4.47E-01 | 1                  | 4.47E-01 |
| CLMN     | 14  | 10                 | 7.68E-02 | 10                 | 7.68E-02 | 10                 | 1.00E+00 | 10                 | 1.00E+00 | 3                  | 2.65E-01 | 3                  | 2.65E-01 |
| FAM161A  | 2   | 4                  | 1.06E-01 | 4                  | 1.06E-01 | 4                  | 2.65E-01 | 4                  | 2.65E-01 | 2                  | 1.00E+00 | 2                  | 1.00E+00 |
| FAM71E2  | 19  | 4                  | 1.00E+00 | 4                  | 1.00E+00 | 3                  | 2.65E-01 | 3                  | 2.65E-01 | 2                  | 3.74E-01 | 2                  | 3.74E-01 |
| ADAMTS20 | 12  | 6                  | 6.50E-01 | 6                  | 6.50E-01 | 5                  | 2.65E-01 | 5                  | 2.65E-01 | 3                  | 2.68E-01 | 3                  | 2.68E-01 |
| STRIP2   | 7   | 3                  | 2.44E-01 | 3                  | 2.44E-01 | 3                  | 2.65E-01 | 3                  | 2.65E-01 | 1                  | 6.55E-01 | 1                  | 6.55E-01 |

| SetID    | Chr | ADEH- vs NA        |          |                    |          | ADEH+ vs ADEH-     |          |                    |          | ADEH+ vs NA        |          |                    |          |
|----------|-----|--------------------|----------|--------------------|----------|--------------------|----------|--------------------|----------|--------------------|----------|--------------------|----------|
|          |     | rarenovel          |          | all                |          | rarenovel          |          | all                |          | rarenovel          |          | all                |          |
|          |     | N variants in test | p-value  | N variants in test | p-value  | N variants in test | p-value  | N variants in test | p-value  | N variants in test | p-value  | N variants in test | p-value  |
| METTL11B | 1   | 2                  | 1.00E+00 | 3                  | 2.23E-01 | 2                  | 2.65E-01 | 3                  | 3.86E-01 | 1                  | 3.77E-01 | 2                  | 7.93E-01 |
| BTBD16   | 10  | 5                  | 8.80E-01 | 6                  | 1.00E+00 | 5                  | 4.01E-01 | 6                  | 3.67E-01 | 1                  | 2.90E-01 | 2                  | 2.66E-01 |
| CPXM1    | 20  | 6                  | 1.00E+00 | 6                  | 1.00E+00 | 7                  | 2.66E-01 | 7                  | 2.66E-01 | 5                  | 3.64E-01 | 5                  | 3.64E-01 |
| NACA     | 12  | 1                  | 2.48E-01 | 1                  | 2.48E-01 | 1                  | 5.10E-01 | 1                  | 5.10E-01 | 1                  | 2.66E-01 | 1                  | 2.66E-01 |
| ZNF703   | 8   | 1                  | 4.41E-01 | 1                  | 4.41E-01 | 1                  | 1.00E+00 | 1                  | 1.00E+00 | 1                  | 2.66E-01 | 1                  | 2.66E-01 |
| ZFYVE26  | 14  | 8                  | 2.51E-01 | 8                  | 2.51E-01 | 5                  | 4.41E-01 | 5                  | 4.41E-01 | 4                  | 2.66E-01 | 4                  | 2.66E-01 |
| MISP     | 19  | 3                  | 8.19E-01 | 3                  | 8.19E-01 | 3                  | 3.24E-01 | 3                  | 3.24E-01 | 1                  | 2.66E-01 | 1                  | 2.66E-01 |
| SLC3A1   | 2   | 4                  | 8.67E-01 | 4                  | 8.67E-01 | 4                  | 2.67E-01 | 4                  | 2.67E-01 | 3                  | 2.77E-01 | 3                  | 2.77E-01 |
| DIP2A    | 21  | 5                  | 7.69E-01 | 5                  | 7.69E-01 | 3                  | 2.67E-01 | 3                  | 2.67E-01 | 3                  | 2.98E-01 | 3                  | 2.98E-01 |
| FAM181A  | 14  | 2                  | 6.04E-01 | 2                  | 6.04E-01 | 2                  | 4.33E-01 | 2                  | 4.33E-01 | 1                  | 2.67E-01 | 1                  | 2.67E-01 |
| RGP1     | 9   | 2                  | 1.00E+00 | 2                  | 1.00E+00 | 2                  | 3.36E-01 | 2                  | 3.36E-01 | 1                  | 2.67E-01 | 1                  | 2.67E-01 |
| FBXO38   | 5   | 6                  | 2.95E-01 | 6                  | 2.95E-01 | 3                  | 2.67E-01 | 3                  | 2.67E-01 | 4                  | 5.25E-01 | 4                  | 5.25E-01 |
| SETD2    | 3   | 9                  | 5.47E-01 | 9                  | 5.47E-01 | 9                  | 5.38E-01 | 9                  | 5.38E-01 | 3                  | 2.67E-01 | 3                  | 2.67E-01 |
| TBC1D9B  | 5   | 8                  | 3.64E-01 | 8                  | 3.64E-01 | 8                  | 5.48E-01 | 8                  | 5.48E-01 | 5                  | 2.67E-01 | 5                  | 2.67E-01 |
| NOXA1    | 9   | 2                  | 7.09E-01 | 2                  | 7.09E-01 | 2                  | 3.06E-01 | 2                  | 3.06E-01 | 2                  | 2.67E-01 | 2                  | 2.67E-01 |
| LPP      | 3   | 8                  | 3.06E-01 | 8                  | 3.06E-01 | 6                  | 3.35E-01 | 6                  | 3.35E-01 | 4                  | 2.67E-01 | 4                  | 2.67E-01 |
| DLAT     | 11  | 1                  | 7.30E-02 | 2                  | 7.28E-02 |                    |          | 1                  | 2.68E-01 | 1                  | 6.38E-01 | 2                  | 6.38E-01 |
| ADAMTSL3 | 15  | 11                 | 2.07E-01 | 11                 | 2.07E-01 | 8                  | 3.47E-01 | 8                  | 3.47E-01 | 6                  | 2.68E-01 | 6                  | 2.68E-01 |
| PLB1     | 2   | 9                  | 3.66E-02 | 10                 | 3.63E-02 | 4                  | 3.44E-01 | 5                  | 3.44E-01 | 7                  | 2.69E-01 | 8                  | 2.68E-01 |
| TENM4    | 11  | 14                 | 6.06E-01 | 14                 | 6.06E-01 | 11                 | 2.68E-01 | 11                 | 2.68E-01 | 4                  | 3.52E-01 | 4                  | 3.52E-01 |
| DOK2     | 8   | 5                  | 1.92E-01 | 5                  | 1.92E-01 | 5                  | 2.68E-01 | 5                  | 2.68E-01 | 1                  | 6.04E-01 | 1                  | 6.04E-01 |
| SCYL2    | 12  | 1                  | 7.53E-01 | 2                  | 5.75E-01 | 1                  | 4.95E-01 | 2                  | 5.78E-01 |                    |          | 1                  | 2.68E-01 |
| GABRP    | 5   | 3                  | 1.00E+00 | 3                  | 1.00E+00 | 3                  | 2.68E-01 | 3                  | 2.68E-01 | 2                  | 4.45E-01 | 2                  | 4.45E-01 |
| CAPN9    | 1   | 8                  | 1.00E+00 | 8                  | 1.00E+00 | 7                  | 2.68E-01 | 7                  | 2.68E-01 | 4                  | 2.94E-01 | 4                  | 2.94E-01 |
| SEC14L3  | 22  | 7                  | 2.87E-01 | 8                  | 2.87E-01 | 4                  | 4.48E-01 | 5                  | 4.44E-01 | 5                  | 2.70E-01 | 6                  | 2.68E-01 |
| CPXM2    | 10  | 6                  | 3.68E-01 | 6                  | 3.68E-01 | 5                  | 4.77E-01 | 5                  | 4.77E-01 | 3                  | 2.68E-01 | 3                  | 2.68E-01 |
| FAM179A  | 2   | 6                  | 5.77E-01 | 7                  | 5.98E-01 | 5                  | 2.69E-01 | 6                  | 2.71E-01 | 2                  | 3.14E-01 | 3                  | 3.19E-01 |
| SPESP1   | 15  | 1                  | 7.55E-01 | 2                  | 5.72E-02 | 1                  | 5.00E-01 | 2                  | 2.69E-01 |                    |          | 1                  | 8.71E-01 |
| METTL24  | 6   | 1                  | 4.35E-01 | 1                  | 4.35E-01 | 1                  | 3.42E-01 | 1                  | 3.42E-01 | 1                  | 2.69E-01 | 1                  | 2.69E-01 |
| ICE1     | 5   | 6                  | 7.67E-01 | 6                  | 7.67E-01 | 5                  | 2.69E-01 | 5                  | 2.69E-01 | 4                  | 3.69E-01 | 4                  | 3.69E-01 |
| OR51V1   | 11  | 5                  | 1.00E+00 | 5                  | 1.00E+00 | 4                  | 2.69E-01 | 4                  | 2.69E-01 | 3                  | 2.91E-01 | 3                  | 2.91E-01 |
| METTL7B  | 12  | 2                  | 1.00E+00 | 2                  | 1.00E+00 | 2                  | 2.69E-01 | 2                  | 2.69E-01 | 2                  | 2.70E-01 | 2                  | 2.70E-01 |
| TSPAN15  | 10  | 3                  | 7.36E-01 | 3                  | 7.36E-01 | 3                  | 2.69E-01 | 3                  | 2.69E-01 | 1                  | 3.20E-01 | 1                  | 3.20E-01 |
| ITGA11   | 15  | 7                  | 1.64E-01 | 7                  | 1.64E-01 | 6                  | 3.21E-01 | 6                  | 3.21E-01 | 3                  | 2.70E-01 | 3                  | 2.70E-01 |
| ABTB1    | 3   | 2                  | 4.57E-01 | 2                  | 4.57E-01 | 2                  | 2.70E-01 | 2                  | 2.70E-01 | 1                  | 3.28E-01 | 1                  | 3.28E-01 |
| DNAJB9   | 7   | 4                  | 9.22E-02 | 4                  | 9.22E-02 | 3                  | 2.70E-01 | 3                  | 2.70E-01 | 1                  | 6.30E-01 | 1                  | 6.30E-01 |
| KLC3     | 19  | 4                  | 5.85E-02 | 4                  | 5.85E-02 | 1                  | 2.88E-01 | 1                  | 2.88E-01 | 4                  | 2.70E-01 | 4                  | 2.70E-01 |
| CHD8     | 14  | 5                  | 9.29E-01 | 5                  | 9.29E-01 | 5                  | 2.70E-01 | 5                  | 2.70E-01 | 3                  | 2.82E-01 | 3                  | 2.82E-01 |
| NCBP3    | 17  | 3                  | 4.02E-01 | 3                  | 4.02E-01 | 3                  | 2.70E-01 | 3                  | 2.70E-01 | 1                  | 4.47E-01 | 1                  | 4.47E-01 |
| PCDHB10  | 5   | 1                  | 1.00E+00 | 2                  | 1.00E+00 | 1                  | 2.70E-01 | 2                  | 2.72E-01 | 1                  | 3.15E-01 | 2                  | 3.24E-01 |
| PTPRJ    | 11  | 6                  | 3.02E-01 | 6                  | 3.02E-01 | 5                  | 2.70E-01 | 5                  | 2.70E-01 | 4                  | 3.99E-01 | 4                  | 3.99E-01 |
| SCAMP2   | 15  | 2                  | 1.24E-02 | 2                  | 1.24E-02 | 1                  | 4.27E-01 | 1                  | 4.27E-01 | 1                  | 2.70E-01 | 1                  | 2.70E-01 |
| AIM1L    | 1   | 7                  | 1.49E-01 | 8                  | 1.59E-01 | 5                  | 5.24E-01 | 6                  | 4.82E-01 | 6                  | 2.71E-01 | 7                  | 2.74E-01 |
| FAM189B  | 1   | 8                  | 4.67E-01 | 8                  | 4.67E-01 | 7                  | 2.71E-01 | 7                  | 2.71E-01 | 2                  | 3.56E-01 | 2                  | 3.56E-01 |
| ALS2CL   | 3   | 5                  | 3.27E-02 | 5                  | 3.27E-02 | 4                  | 4.78E-01 | 4                  | 4.78E-01 | 3                  | 2.71E-01 | 3                  | 2.71E-01 |
| FGD6     | 12  | 7                  | 2.66E-01 | 7                  | 2.66E-01 | 8                  | 3.78E-01 | 8                  | 3.78E-01 | 2                  | 2.71E-01 | 2                  | 2.71E-01 |
| PCDHGB2  | 5   | 5                  | 1.34E-03 | 5                  | 1.34E-03 | 2                  | 6.17E-01 | 2                  | 6.17E-01 | 4                  | 2.72E-01 | 4                  | 2.72E-01 |
| CD33     | 19  | 1                  | 1.78E-02 | 1                  | 1.78E-02 | 1                  | 5.25E-01 | 1                  | 5.25E-01 | 1                  | 2.72E-01 | 1                  | 2.72E-01 |

| SetID    | Chr | ADEH- vs NA        |          |                    |          | ADEH+ vs ADEH-     |          |                    |          | ADEH+ vs NA        |          |                    |          |
|----------|-----|--------------------|----------|--------------------|----------|--------------------|----------|--------------------|----------|--------------------|----------|--------------------|----------|
|          |     | rarenovel          |          | all                |          | rarenovel          |          | all                |          | rarenovel          |          | all                |          |
|          |     | N variants in test | p-value  | N variants in test | p-value  | N variants in test | p-value  | N variants in test | p-value  | N variants in test | p-value  | N variants in test | p-value  |
| AAK1     | 2   | 4                  | 5.17E-01 | 4                  | 5.17E-01 | 4                  | 3.76E-01 | 4                  | 3.76E-01 | 1                  | 2.72E-01 | 1                  | 2.72E-01 |
| PTPN13   | 4   | 19                 | 4.67E-01 | 19                 | 4.67E-01 | 16                 | 2.72E-01 | 16                 | 2.72E-01 | 13                 | 7.00E-01 | 13                 | 7.00E-01 |
| CBS      | 21  | 2                  | 4.84E-01 | 2                  | 4.84E-01 | 2                  | 3.79E-01 | 2                  | 3.79E-01 | 1                  | 2.72E-01 | 1                  | 2.72E-01 |
| SPATA18  | 4   | 7                  | 2.86E-01 | 7                  | 2.86E-01 | 4                  | 2.72E-01 | 4                  | 2.72E-01 | 4                  | 4.00E-01 | 4                  | 4.00E-01 |
| CFB      | 6   | 1                  | 5.24E-01 | 2                  | 4.79E-01 | 1                  | 7.59E-01 | 2                  | 4.22E-01 | 1                  | 4.00E-01 | 2                  | 2.73E-01 |
| SGSM3    | 22  | 2                  | 1.00E+00 | 2                  | 1.00E+00 | 2                  | 2.94E-01 | 2                  | 2.94E-01 | 1                  | 2.73E-01 | 1                  | 2.73E-01 |
| ALS2CR11 | 2   | 8                  | 3.55E-01 | 8                  | 3.55E-01 | 8                  | 7.18E-01 | 8                  | 7.18E-01 | 2                  | 2.73E-01 | 2                  | 2.73E-01 |
| COL28A1  | 7   | 14                 | 4.05E-01 | 14                 | 4.05E-01 | 14                 | 4.49E-01 | 14                 | 4.49E-01 | 7                  | 2.73E-01 | 7                  | 2.73E-01 |
| ZFYVE19  | 15  | 2                  | 4.00E-01 | 2                  | 4.00E-01 | 2                  | 2.73E-01 | 2                  | 2.73E-01 | 2                  | 6.41E-01 | 2                  | 6.41E-01 |
| UBR4     | 1   | 15                 | 4.87E-01 | 15                 | 4.87E-01 | 13                 | 2.73E-01 | 13                 | 2.73E-01 | 3                  | 3.69E-01 | 3                  | 3.69E-01 |
| KLKB1    | 4   | 5                  | 2.88E-01 | 5                  | 2.88E-01 | 3                  | 2.73E-01 | 3                  | 2.73E-01 | 4                  | 7.18E-01 | 4                  | 7.18E-01 |
| EFCAB5   | 17  | 4                  | 2.00E-01 | 4                  | 2.00E-01 | 3                  | 2.73E-01 | 3                  | 2.73E-01 | 3                  | 7.11E-01 | 3                  | 7.11E-01 |
| SLC2A11  | 22  | 3                  | 1.00E+00 | 3                  | 1.00E+00 | 3                  | 3.83E-01 | 3                  | 3.83E-01 | 2                  | 2.73E-01 | 2                  | 2.73E-01 |
| MAP3K19  | 2   | 6                  | 6.79E-01 | 6                  | 6.79E-01 | 3                  | 2.73E-01 | 3                  | 2.73E-01 | 4                  | 2.95E-01 | 4                  | 2.95E-01 |
| ACP2     | 11  | 1                  | 1.80E-01 | 1                  | 1.80E-01 | 1                  | 4.34E-01 | 1                  | 4.34E-01 | 1                  | 2.73E-01 | 1                  | 2.73E-01 |
| KNTC1    | 12  | 7                  | 1.51E-01 | 8                  | 2.36E-01 | 3                  | 2.81E-01 | 4                  | 2.73E-01 | 5                  | 5.96E-01 | 6                  | 6.11E-01 |
| OGDHL    | 10  | 4                  | 5.48E-01 | 4                  | 5.48E-01 | 3                  | 4.10E-01 | 3                  | 4.10E-01 | 2                  | 2.73E-01 | 2                  | 2.73E-01 |
| TEX14    | 17  | 4                  | 1.47E-01 | 4                  | 1.47E-01 | 4                  | 2.73E-01 | 4                  | 2.73E-01 | 1                  | 6.98E-01 | 1                  | 6.98E-01 |
| OR9I1    | 11  | 3                  | 2.37E-01 | 3                  | 2.37E-01 | 3                  | 2.74E-01 | 3                  | 2.74E-01 | 1                  | 4.45E-01 | 1                  | 4.45E-01 |
| CCDC146  | 7   | 4                  | 1.35E-02 | 4                  | 1.35E-02 | 3                  | 6.30E-01 | 3                  | 6.30E-01 | 4                  | 2.74E-01 | 4                  | 2.74E-01 |
| PTPRO    | 12  | 4                  | 7.16E-01 | 4                  | 7.16E-01 | 3                  | 3.68E-01 | 3                  | 3.68E-01 | 2                  | 2.74E-01 | 2                  | 2.74E-01 |
| NLRP6    | 11  | 5                  | 8.42E-01 | 5                  | 8.42E-01 | 5                  | 5.05E-01 | 5                  | 5.05E-01 | 3                  | 2.74E-01 | 3                  | 2.74E-01 |
| IFRD2    | 3   | 5                  | 5.94E-01 | 5                  | 5.94E-01 | 3                  | 2.74E-01 | 3                  | 2.74E-01 | 4                  | 2.76E-01 | 4                  | 2.76E-01 |
| COL4A1   | 13  | 6                  | 5.44E-01 | 6                  | 5.44E-01 | 5                  | 2.74E-01 | 5                  | 2.74E-01 | 3                  | 4.55E-01 | 3                  | 4.55E-01 |
| FOXR1    | 11  | 3                  | 3.55E-01 | 3                  | 3.55E-01 | 3                  | 2.74E-01 | 3                  | 2.74E-01 | 1                  | 3.24E-01 | 1                  | 3.24E-01 |
| ENPP3    | 6   | 8                  | 3.10E-01 | 9                  | 3.10E-01 | 6                  | 2.74E-01 | 7                  | 3.07E-01 | 2                  | 6.47E-01 | 3                  | 6.67E-01 |
| ANKUB1   | 3   | 2                  | 5.87E-01 | 2                  | 5.87E-01 | 2                  | 2.75E-01 | 2                  | 2.75E-01 | 1                  | 3.49E-01 | 1                  | 3.49E-01 |
| PIK3R2   | 19  | 2                  | 5.23E-02 | 2                  | 5.23E-02 | 1                  | 1.00E+00 | 1                  | 1.00E+00 | 2                  | 2.75E-01 | 2                  | 2.75E-01 |
| LRRK2    | 12  | 4                  | 9.17E-01 | 5                  | 1.00E+00 | 4                  | 3.22E-01 | 5                  | 3.27E-01 | 2                  | 2.75E-01 | 3                  | 3.72E-01 |
| VPS54    | 2   | 4                  | 3.29E-02 | 4                  | 3.29E-02 | 3                  | 4.83E-01 | 3                  | 4.83E-01 | 2                  | 2.75E-01 | 2                  | 2.75E-01 |
| CFAP65   | 2   | 4                  | 1.20E-01 | 4                  | 1.20E-01 | 2                  | 3.97E-01 | 2                  | 3.97E-01 | 3                  | 2.75E-01 | 3                  | 2.75E-01 |
| SCUBE2   | 11  | 7                  | 2.46E-01 | 7                  | 2.46E-01 | 6                  | 1.00E+00 | 6                  | 1.00E+00 | 2                  | 2.75E-01 | 2                  | 2.75E-01 |
| NLRP2    | 19  | 3                  | 3.46E-01 | 3                  | 3.46E-01 | 3                  | 3.20E-01 | 3                  | 3.20E-01 | 3                  | 2.75E-01 | 3                  | 2.75E-01 |
| IFT172   | 2   | 9                  | 5.22E-01 | 9                  | 5.22E-01 | 9                  | 2.82E-01 | 9                  | 2.82E-01 | 2                  | 2.75E-01 | 2                  | 2.75E-01 |
| SNX21    | 20  | 2                  | 3.71E-02 | 2                  | 3.71E-02 | 2                  | 2.75E-01 | 2                  | 2.75E-01 |                    |          |                    |          |
| PCCB     | 3   | 4                  | 2.25E-01 | 4                  | 2.25E-01 | 2                  | 3.82E-01 | 2                  | 3.82E-01 | 3                  | 2.75E-01 | 3                  | 2.75E-01 |
| MPPE1    | 18  | 3                  | 4.76E-02 | 3                  | 4.76E-02 | 1                  | 2.76E-01 | 1                  | 2.76E-01 | 3                  | 1.00E+00 | 3                  | 1.00E+00 |
| PLA2G12A | 4   | 2                  | 8.76E-01 | 2                  | 8.76E-01 | 2                  | 3.71E-01 | 2                  | 3.71E-01 | 1                  | 2.76E-01 | 1                  | 2.76E-01 |
| KIF7     | 15  | 6                  | 2.37E-01 | 6                  | 2.37E-01 | 4                  | 2.76E-01 | 4                  | 2.76E-01 | 4                  | 4.68E-01 | 4                  | 4.68E-01 |
| HIF1A    | 14  | 1                  | 2.97E-01 | 1                  | 2.97E-01 | 1                  | 2.76E-01 | 1                  | 2.76E-01 | 1                  | 6.17E-01 | 1                  | 6.17E-01 |
| ZC3H13   | 13  | 8                  | 1.65E-01 | 8                  | 1.65E-01 | 8                  | 2.76E-01 | 8                  | 2.76E-01 | 5                  | 4.69E-01 | 5                  | 4.69E-01 |
| ZNF880   | 19  | 3                  | 1.41E-01 | 5                  | 3.21E-01 | 1                  | 5.25E-01 | 3                  | 2.76E-01 | 2                  | 6.34E-01 | 4                  | 8.05E-01 |
| XAF1     | 17  | 2                  | 1.82E-01 | 2                  | 1.82E-01 | 2                  | 2.76E-01 | 2                  | 2.76E-01 | 1                  | 6.74E-01 | 1                  | 6.74E-01 |
| TOX2     | 20  | 5                  | 2.19E-01 | 5                  | 2.19E-01 | 3                  | 3.66E-01 | 3                  | 3.66E-01 | 4                  | 2.76E-01 | 4                  | 2.76E-01 |
| TMEM25   | 11  | 6                  | 7.57E-01 | 6                  | 7.57E-01 | 5                  | 2.90E-01 | 5                  | 2.90E-01 | 3                  | 2.76E-01 | 3                  | 2.76E-01 |
| ZNF429   | 19  | 4                  | 2.20E-01 | 4                  | 2.20E-01 | 3                  | 2.76E-01 | 3                  | 2.76E-01 | 3                  | 4.12E-01 | 3                  | 4.12E-01 |
| PALLD    | 4   | 3                  | 3.04E-01 | 4                  | 4.17E-01 | 3                  | 7.34E-01 | 4                  | 6.73E-01 | 1                  | 4.48E-01 | 2                  | 2.76E-01 |
| SLCO2A1  | 3   | 2                  | 7.11E-01 | 2                  | 7.11E-01 | 2                  | 2.76E-01 | 2                  | 2.76E-01 | 1                  | 5.04E-01 | 1                  | 5.04E-01 |

| SetID     | Chr | ADEH- vs NA        |          |                    |          | ADEH+ vs ADEH-     |          |                    |          | ADEH+ vs NA        |          |                    |          |
|-----------|-----|--------------------|----------|--------------------|----------|--------------------|----------|--------------------|----------|--------------------|----------|--------------------|----------|
|           |     | rarenovel          |          | all                |          | rarenovel          |          | all                |          | rarenovel          |          | all                |          |
|           |     | N variants in test | p-value  | N variants in test | p-value  | N variants in test | p-value  | N variants in test | p-value  | N variants in test | p-value  | N variants in test | p-value  |
| NUDT6     | 4   | 1                  | 1.82E-02 | 2                  | 1.41E-02 |                    |          | 1                  | 2.76E-01 | 1                  | 4.52E-01 | 2                  | 4.73E-01 |
| CHAD      | 17  | 2                  | 2.26E-01 | 2                  | 2.26E-01 | 2                  | 2.77E-01 | 2                  | 2.77E-01 | 1                  | 6.92E-01 | 1                  | 6.92E-01 |
| SLC34A2   | 4   | 4                  | 5.71E-02 | 4                  | 5.71E-02 | 4                  | 1.00E+00 | 4                  | 1.00E+00 | 3                  | 2.77E-01 | 3                  | 2.77E-01 |
| MGST2     | 4   | 3                  | 1.00E+00 | 3                  | 1.00E+00 | 3                  | 3.78E-01 | 3                  | 3.78E-01 | 2                  | 2.77E-01 | 2                  | 2.77E-01 |
| CIDEA     | 18  | 4                  | 8.48E-01 | 4                  | 8.48E-01 | 4                  | 2.77E-01 | 4                  | 2.77E-01 | 2                  | 3.43E-01 | 2                  | 3.43E-01 |
| SIPA1L2   | 1   | 6                  | 1.74E-01 | 7                  | 1.96E-01 | 4                  | 3.26E-01 | 5                  | 2.93E-01 | 3                  | 3.20E-01 | 4                  | 2.77E-01 |
| CHMP4A    | 14  | 2                  | 5.74E-01 | 3                  | 5.74E-01 | 2                  | 6.23E-01 | 3                  | 6.23E-01 |                    |          | 1                  | 2.77E-01 |
| ABCG5     | 2   | 3                  | 8.35E-01 | 4                  | 1.98E-01 | 3                  | 4.57E-01 | 4                  | 5.01E-01 | 2                  | 6.34E-01 | 3                  | 2.77E-01 |
| ATP7B     | 13  | 10                 | 7.47E-01 | 10                 | 7.47E-01 | 9                  | 2.77E-01 | 9                  | 2.77E-01 | 3                  | 3.22E-01 | 3                  | 3.22E-01 |
| PSD4      | 2   | 2                  | 8.00E-01 | 2                  | 8.00E-01 | 2                  | 1.00E+00 | 2                  | 1.00E+00 | 1                  | 2.77E-01 | 1                  | 2.77E-01 |
| MAPK3     | 16  | 2                  | 7.29E-01 | 2                  | 7.29E-01 | 2                  | 2.77E-01 | 2                  | 2.77E-01 | 1                  | 3.73E-01 | 1                  | 3.73E-01 |
| MMRN1     | 4   | 6                  | 1.93E-02 | 6                  | 1.93E-02 | 3                  | 2.78E-01 | 3                  | 2.78E-01 | 5                  | 1.00E+00 | 5                  | 1.00E+00 |
| CAMSAP3   | 19  | 4                  | 8.62E-01 | 4                  | 8.62E-01 | 3                  | 2.78E-01 | 3                  | 2.78E-01 | 3                  | 3.71E-01 | 3                  | 3.71E-01 |
| EPRS      | 1   | 6                  | 3.28E-01 | 6                  | 3.28E-01 | 4                  | 4.11E-01 | 4                  | 4.11E-01 | 3                  | 2.78E-01 | 3                  | 2.78E-01 |
| HAUS5     | 19  | 2                  | 1.01E-01 | 2                  | 1.01E-01 | 1                  | 2.78E-01 | 1                  | 2.78E-01 | 1                  | 6.60E-01 | 1                  | 6.60E-01 |
| ZNF230    | 19  | 4                  | 3.86E-01 | 4                  | 3.86E-01 | 3                  | 5.71E-01 | 3                  | 5.71E-01 | 2                  | 2.78E-01 | 2                  | 2.78E-01 |
| AKR1A1    | 1   | 4                  | 3.33E-01 | 5                  | 5.16E-01 | 3                  | 2.78E-01 | 4                  | 1.00E+00 | 2                  | 6.31E-01 | 3                  | 8.92E-01 |
| C1orf158  | 1   | 1                  | 7.46E-01 | 1                  | 7.46E-01 | 1                  | 2.78E-01 | 1                  | 2.78E-01 | 1                  | 1.00E+00 | 1                  | 1.00E+00 |
| CCDC59    | 12  | 1                  | 6.76E-01 | 1                  | 6.76E-01 | 1                  | 2.79E-01 | 1                  | 2.79E-01 | 1                  | 4.49E-01 | 1                  | 4.49E-01 |
| CASP7     | 10  | 1                  | 5.28E-02 | 1                  | 5.28E-02 | 1                  | 2.79E-01 | 1                  | 2.79E-01 |                    |          |                    |          |
| TRAPPC6A  | 19  | 1                  | 8.75E-02 | 1                  | 8.75E-02 | 1                  | 2.79E-01 | 1                  | 2.79E-01 |                    |          |                    |          |
| ATHL1     | 11  | 1                  | 9.33E-01 | 1                  | 9.33E-01 | 1                  | 3.59E-01 | 1                  | 3.59E-01 | 1                  | 2.79E-01 | 1                  | 2.79E-01 |
| AIFM3     | 22  | 3                  | 4.09E-01 | 3                  | 4.09E-01 | 2                  | 2.79E-01 | 2                  | 2.79E-01 | 2                  | 3.57E-01 | 2                  | 3.57E-01 |
| MASP2     | 1   | 8                  | 5.23E-01 | 8                  | 5.23E-01 | 7                  | 2.80E-01 | 7                  | 2.80E-01 | 3                  | 5.19E-01 | 3                  | 5.19E-01 |
| OR10G9    | 11  | 2                  | 6.71E-01 | 2                  | 6.71E-01 | 2                  | 4.79E-01 | 2                  | 4.79E-01 | 2                  | 2.80E-01 | 2                  | 2.80E-01 |
| TSNAXIP1  | 16  | 5                  | 1.92E-01 | 5                  | 1.92E-01 | 4                  | 6.13E-01 | 4                  | 6.13E-01 | 4                  | 2.80E-01 | 4                  | 2.80E-01 |
| RANGRF    | 17  | 2                  | 3.87E-01 | 2                  | 3.87E-01 | 2                  | 2.80E-01 | 2                  | 2.80E-01 | 1                  | 4.53E-01 | 1                  | 4.53E-01 |
| ELMO3     | 16  | 6                  | 3.24E-01 | 7                  | 1.64E-01 | 5                  | 3.09E-01 | 6                  | 4.67E-01 | 3                  | 2.80E-01 | 4                  | 3.77E-01 |
| KRT40     | 17  | 2                  | 1.65E-02 | 3                  | 1.64E-02 |                    |          | 1                  | 2.80E-01 | 2                  | 6.22E-01 | 3                  | 6.19E-01 |
| MYH6      | 14  | 11                 | 4.99E-01 | 12                 | 4.58E-01 | 6                  | 3.91E-01 | 7                  | 2.80E-01 | 6                  | 3.20E-01 | 7                  | 2.85E-01 |
| ADAM2     | 8   | 5                  | 6.96E-01 | 5                  | 6.96E-01 | 4                  | 2.80E-01 | 4                  | 2.80E-01 | 2                  | 3.59E-01 | 2                  | 3.59E-01 |
| IFT74     | 9   | 3                  | 8.55E-01 | 3                  | 8.55E-01 | 2                  | 2.80E-01 | 2                  | 2.80E-01 | 2                  | 3.17E-01 | 2                  | 3.17E-01 |
| TMBIM1    | 2   | 2                  | 6.22E-01 | 2                  | 6.22E-01 | 2                  | 3.86E-01 | 2                  | 3.86E-01 | 1                  | 2.81E-01 | 1                  | 2.81E-01 |
| STXBP2    | 19  | 6                  | 8.53E-01 | 6                  | 8.53E-01 | 4                  | 2.81E-01 | 4                  | 2.81E-01 | 5                  | 2.99E-01 | 5                  | 2.99E-01 |
| C1orf228  | 1   | 1                  | 7.19E-01 | 1                  | 7.19E-01 | 1                  | 1.00E+00 | 1                  | 1.00E+00 | 1                  | 2.81E-01 | 1                  | 2.81E-01 |
| OR1F1     | 16  | 3                  | 1.69E-02 | 3                  | 1.69E-02 | 3                  | 2.81E-01 | 3                  | 2.81E-01 | 3                  | 6.19E-01 | 3                  | 6.19E-01 |
| ZNF276    | 16  | 3                  | 4.96E-01 | 3                  | 4.96E-01 | 3                  | 1.00E+00 | 3                  | 1.00E+00 | 1                  | 2.81E-01 | 1                  | 2.81E-01 |
| PTCHD2    | 1   | 3                  | 1.81E-01 | 3                  | 1.81E-01 | 2                  | 2.81E-01 | 2                  | 2.81E-01 | 3                  | 1.00E+00 | 3                  | 1.00E+00 |
| NUB1      | 7   | 4                  | 4.53E-01 | 4                  | 4.53E-01 | 3                  | 2.81E-01 | 3                  | 2.81E-01 | 4                  | 5.52E-01 | 4                  | 5.52E-01 |
| CITED4    | 1   | 1                  | 3.24E-01 | 1                  | 3.24E-01 | 1                  | 1.00E+00 | 1                  | 1.00E+00 | 1                  | 2.81E-01 | 1                  | 2.81E-01 |
| WDR48     | 3   | 1                  | 8.22E-01 | 1                  | 8.22E-01 | 1                  | 2.81E-01 | 1                  | 2.81E-01 | 1                  | 3.23E-01 | 1                  | 3.23E-01 |
| C17orf107 | 17  | 1                  | 7.57E-01 | 2                  | 5.64E-01 | 1                  | 5.78E-01 | 2                  | 6.79E-01 |                    |          | 1                  | 2.81E-01 |
| ADCK4     | 19  | 6                  | 5.18E-01 | 6                  | 5.18E-01 | 3                  | 2.82E-01 | 3                  | 2.82E-01 | 6                  | 8.52E-01 | 6                  | 8.52E-01 |
| PLOD1     | 1   | 4                  | 6.59E-01 | 4                  | 6.59E-01 | 3                  | 2.94E-01 | 3                  | 2.94E-01 | 3                  | 2.82E-01 | 3                  | 2.82E-01 |
| KLK14     | 19  | 5                  | 6.28E-01 | 5                  | 6.28E-01 | 5                  | 4.19E-01 | 5                  | 4.19E-01 | 2                  | 2.82E-01 | 2                  | 2.82E-01 |
| CCDC9     | 19  | 5                  | 9.32E-01 | 5                  | 9.32E-01 | 5                  | 2.83E-01 | 5                  | 2.83E-01 | 3                  | 2.82E-01 | 3                  | 2.82E-01 |
| SYCE2     | 19  | 1                  | 7.66E-02 | 1                  | 7.66E-02 | 1                  | 2.82E-01 | 1                  | 2.82E-01 |                    |          |                    |          |
| DSCC1     | 8   | 2                  | 3.78E-02 | 2                  | 3.78E-02 | 2                  | 2.82E-01 | 2                  | 2.82E-01 |                    |          |                    |          |

| SetID    | Chr | ADEH- vs NA        |          |                    |          | ADEH+ vs ADEH-     |          |                    |          | ADEH+ vs NA        |          |                    |          |
|----------|-----|--------------------|----------|--------------------|----------|--------------------|----------|--------------------|----------|--------------------|----------|--------------------|----------|
|          |     | rarenovel          |          | all                |          | rarenovel          |          | all                |          | rarenovel          |          | all                |          |
|          |     | N variants in test | p-value  | N variants in test | p-value  | N variants in test | p-value  | N variants in test | p-value  | N variants in test | p-value  | N variants in test | p-value  |
| ANKRD44  | 2   | 1                  | 1.00E+00 | 2                  | 3.91E-01 | 1                  | 2.82E-01 | 2                  | 4.79E-01 | 1                  | 3.34E-01 | 2                  | 2.83E-01 |
| ACAD11   | 3   | 4                  | 7.63E-01 | 4                  | 7.63E-01 | 4                  | 2.82E-01 | 4                  | 2.82E-01 | 3                  | 3.08E-01 | 3                  | 3.08E-01 |
| NTHL1    | 16  | 4                  | 4.16E-01 | 4                  | 4.16E-01 | 4                  | 2.83E-01 | 4                  | 2.83E-01 | 1                  | 4.48E-01 | 1                  | 4.48E-01 |
| EFS      | 14  | 3                  | 5.63E-01 | 4                  | 4.76E-01 | 3                  | 3.23E-01 | 4                  | 2.83E-01 | 1                  | 3.47E-01 | 2                  | 3.31E-01 |
| ZNF878   | 19  | 6                  | 5.71E-01 | 7                  | 7.56E-01 | 4                  | 3.41E-01 | 5                  | 3.81E-01 | 3                  | 2.83E-01 | 4                  | 3.74E-01 |
| BRD3     | 9   | 1                  | 6.70E-01 | 1                  | 6.70E-01 | 1                  | 2.83E-01 | 1                  | 2.83E-01 | 1                  | 4.55E-01 | 1                  | 4.55E-01 |
| PKP4     | 2   | 4                  | 2.73E-01 | 4                  | 2.73E-01 | 5                  | 3.81E-01 | 5                  | 3.81E-01 | 3                  | 2.83E-01 | 3                  | 2.83E-01 |
| DECR2    | 16  | 2                  | 1.00E+00 | 2                  | 1.00E+00 | 2                  | 2.83E-01 | 2                  | 2.83E-01 | 1                  | 3.29E-01 | 1                  | 3.29E-01 |
| ZSCAN12  | 6   | 2                  | 1.31E-01 | 2                  | 1.31E-01 | 2                  | 2.84E-01 | 2                  | 2.84E-01 | 1                  | 6.18E-01 | 1                  | 6.18E-01 |
| IGSF21   | 1   | 4                  | 2.58E-01 | 4                  | 2.58E-01 | 4                  | 2.84E-01 | 4                  | 2.84E-01 | 3                  | 5.28E-01 | 3                  | 5.28E-01 |
| HAL      | 12  | 13                 | 3.27E-01 | 13                 | 3.27E-01 | 13                 | 5.77E-01 | 13                 | 5.77E-01 | 3                  | 2.84E-01 | 3                  | 2.84E-01 |
| STAB2    | 12  | 17                 | 3.17E-01 | 18                 | 2.17E-01 | 14                 | 8.99E-01 | 15                 | 8.90E-01 | 6                  | 4.20E-01 | 7                  | 2.84E-01 |
| SH2D3A   | 19  | 4                  | 1.22E-01 | 4                  | 1.22E-01 | 3                  | 2.84E-01 | 3                  | 2.84E-01 | 1                  | 6.25E-01 | 1                  | 6.25E-01 |
| TTBK1    | 6   | 5                  | 3.14E-01 | 5                  | 3.14E-01 | 5                  | 3.97E-01 | 5                  | 3.97E-01 | 4                  | 2.84E-01 | 4                  | 2.84E-01 |
| SHARPIN  | 8   | 2                  | 2.37E-01 | 2                  | 2.37E-01 | 2                  | 8.10E-01 | 2                  | 8.10E-01 | 1                  | 2.84E-01 | 1                  | 2.84E-01 |
| LIPI     | 21  | 6                  | 1.73E-01 | 6                  | 1.73E-01 | 5                  | 2.84E-01 | 5                  | 2.84E-01 | 4                  | 1.00E+00 | 4                  | 1.00E+00 |
| PF4V1    | 4   | 2                  | 1.89E-01 | 2                  | 1.89E-01 | 2                  | 2.85E-01 | 2                  | 2.85E-01 | 1                  | 6.01E-01 | 1                  | 6.01E-01 |
| LATS1    | 6   | 5                  | 4.27E-01 | 5                  | 4.27E-01 | 4                  | 3.21E-01 | 4                  | 3.21E-01 | 3                  | 2.85E-01 | 3                  | 2.85E-01 |
| IFT122   | 3   | 4                  | 6.98E-01 | 4                  | 6.98E-01 | 3                  | 2.85E-01 | 3                  | 2.85E-01 | 2                  | 2.88E-01 | 2                  | 2.88E-01 |
| HCAR1    | 12  | 3                  | 2.47E-02 | 3                  | 2.47E-02 | 2                  | 6.35E-01 | 2                  | 6.35E-01 | 2                  | 2.85E-01 | 2                  | 2.85E-01 |
| ZNF544   | 19  | 8                  | 8.15E-01 | 8                  | 8.15E-01 | 8                  | 2.85E-01 | 8                  | 2.85E-01 | 3                  | 3.20E-01 | 3                  | 3.20E-01 |
| OR2T6    | 1   | 1                  | 7.44E-01 | 2                  | 8.04E-01 | 1                  | 5.01E-01 | 2                  | 5.51E-01 |                    |          | 1                  | 2.85E-01 |
| TMC6     | 17  | 5                  | 7.58E-01 | 6                  | 6.32E-01 | 5                  | 2.85E-01 | 6                  | 3.02E-01 | 3                  | 3.60E-01 | 4                  | 4.46E-01 |
| LRP12    | 8   | 1                  | 2.33E-01 | 1                  | 2.33E-01 | 1                  | 2.85E-01 | 1                  | 2.85E-01 | 1                  | 6.32E-01 | 1                  | 6.32E-01 |
| BCAN     | 1   | 2                  | 6.88E-02 | 2                  | 6.88E-02 | 1                  | 1.00E+00 | 1                  | 1.00E+00 | 2                  | 2.85E-01 | 2                  | 2.85E-01 |
| HSPA1L   | 6   | 6                  | 2.47E-01 | 7                  | 2.47E-01 | 3                  | 4.08E-01 | 4                  | 4.08E-01 | 5                  | 2.85E-01 | 6                  | 2.85E-01 |
| TFR2     | 7   | 3                  | 8.39E-01 | 3                  | 8.39E-01 | 2                  | 2.85E-01 | 2                  | 2.85E-01 | 3                  | 4.93E-01 | 3                  | 4.93E-01 |
| PHF3     | 6   | 4                  | 6.06E-01 | 4                  | 6.06E-01 | 3                  | 2.86E-01 | 3                  | 2.86E-01 | 3                  | 3.95E-01 | 3                  | 3.95E-01 |
| SPTBN2   | 11  | 11                 | 2.14E-01 | 11                 | 2.14E-01 | 10                 | 2.86E-01 | 10                 | 2.86E-01 | 2                  | 6.49E-01 | 2                  | 6.49E-01 |
| TEX261   | 2   | 2                  | 1.00E+00 | 2                  | 1.00E+00 | 2                  | 4.84E-01 | 2                  | 4.84E-01 | 1                  | 2.86E-01 | 1                  | 2.86E-01 |
| GPI      | 19  | 1                  | 7.62E-01 | 1                  | 7.62E-01 | 1                  | 2.86E-01 | 1                  | 2.86E-01 | 1                  | 3.69E-01 | 1                  | 3.69E-01 |
| CHRND    | 2   | 5                  | 2.83E-01 | 5                  | 2.83E-01 | 5                  | 1.00E+00 | 5                  | 1.00E+00 | 3                  | 2.86E-01 | 3                  | 2.86E-01 |
| MEGF10   | 5   | 2                  | 6.13E-01 | 2                  | 6.13E-01 | 1                  | 2.86E-01 | 1                  | 2.86E-01 | 2                  | 4.36E-01 | 2                  | 4.36E-01 |
| AHNAK2   | 14  | 6                  | 1.93E-01 | 6                  | 1.93E-01 | 4                  | 2.86E-01 | 4                  | 2.86E-01 | 5                  | 8.08E-01 | 5                  | 8.08E-01 |
| KLHDC4   | 16  | 10                 | 3.09E-01 | 11                 | 3.50E-01 | 8                  | 3.56E-01 | 9                  | 3.63E-01 | 4                  | 2.87E-01 | 5                  | 2.95E-01 |
| KIAA0586 | 14  | 7                  | 4.29E-01 | 7                  | 4.29E-01 | 6                  | 2.87E-01 | 6                  | 2.87E-01 | 2                  | 6.33E-01 | 2                  | 6.33E-01 |
| FRMPD1   | 9   | 7                  | 7.25E-01 | 7                  | 7.25E-01 | 5                  | 2.87E-01 | 5                  | 2.87E-01 | 4                  | 3.30E-01 | 4                  | 3.30E-01 |
| RAI1     | 17  | 5                  | 7.72E-01 | 6                  | 7.72E-01 | 5                  | 2.87E-01 | 6                  | 2.87E-01 | 2                  | 4.33E-01 | 3                  | 4.33E-01 |
| MIB2     | 1   | 3                  | 4.92E-02 | 3                  | 4.92E-02 | 1                  | 2.87E-01 | 1                  | 2.87E-01 | 2                  | 6.36E-01 | 2                  | 6.36E-01 |
| PDXDC1   | 16  | 2                  | 3.63E-01 | 2                  | 3.63E-01 | 1                  | 2.87E-01 | 1                  | 2.87E-01 | 2                  | 6.47E-01 | 2                  | 6.47E-01 |
| NCF2     | 1   | 6                  | 7.82E-01 | 6                  | 7.82E-01 | 6                  | 3.20E-01 | 6                  | 3.20E-01 | 2                  | 2.87E-01 | 2                  | 2.87E-01 |
| OR51Q1   | 11  | 6                  | 9.53E-02 | 7                  | 9.53E-02 | 4                  | 2.87E-01 | 5                  | 2.87E-01 | 4                  | 1.00E+00 | 5                  | 1.00E+00 |
| DDX60L   | 4   | 7                  | 2.38E-01 | 8                  | 2.38E-01 | 4                  | 2.88E-01 | 5                  | 2.88E-01 | 4                  | 7.51E-01 | 5                  | 7.51E-01 |
| EVPL     | 17  | 7                  | 1.00E+00 | 7                  | 1.00E+00 | 7                  | 2.88E-01 | 7                  | 2.88E-01 | 4                  | 3.50E-01 | 4                  | 3.50E-01 |
| INSC     | 11  | 10                 | 1.00E+00 | 11                 | 1.00E+00 | 9                  | 3.27E-01 | 10                 | 3.85E-01 | 6                  | 2.88E-01 | 7                  | 3.75E-01 |
| CERS5    | 12  | 3                  | 5.10E-01 | 3                  | 5.10E-01 | 2                  | 2.88E-01 | 2                  | 2.88E-01 | 2                  | 4.66E-01 | 2                  | 4.66E-01 |
| NEBL     | 10  | 6                  | 1.00E+00 | 6                  | 1.00E+00 | 5                  | 3.03E-01 | 5                  | 3.03E-01 | 3                  | 2.88E-01 | 3                  | 2.88E-01 |
| MTCH2    | 11  |                    |          | 1                  | 7.33E-01 |                    |          | 1                  | 3.57E-01 |                    |          | 1                  | 2.88E-01 |

| SetID    | Chr | ADEH- vs NA        |          |                    |          | ADEH+ vs ADEH-     |          |                    |          | ADEH+ vs NA        |          |                    |          |
|----------|-----|--------------------|----------|--------------------|----------|--------------------|----------|--------------------|----------|--------------------|----------|--------------------|----------|
|          |     | rarenovel          |          | all                |          | rarenovel          |          | all                |          | rarenovel          |          | all                |          |
|          |     | N variants in test | p-value  | N variants in test | p-value  | N variants in test | p-value  | N variants in test | p-value  | N variants in test | p-value  | N variants in test | p-value  |
| MSR1     | 8   | 7                  | 6.82E-01 | 7                  | 6.82E-01 | 6                  | 2.88E-01 | 6                  | 2.88E-01 | 4                  | 3.43E-01 | 4                  | 3.43E-01 |
| ZNF211   | 19  | 1                  | 1.00E+00 | 1                  | 1.00E+00 | 1                  | 2.88E-01 | 1                  | 2.88E-01 | 1                  | 3.31E-01 | 1                  | 3.31E-01 |
| SLC22A25 | 11  | 1                  | 8.71E-02 | 2                  | 8.71E-02 | 1                  | 2.89E-01 | 2                  | 2.89E-01 | 1                  | 6.78E-01 | 1                  | 6.78E-01 |
| P DPR    | 16  | 1                  | 1.98E-01 | 1                  | 1.98E-01 | 1                  | 4.15E-01 | 1                  | 4.15E-01 | 1                  | 2.89E-01 | 1                  | 2.89E-01 |
| ZFP42    | 4   | 3                  | 6.77E-01 | 3                  | 6.77E-01 | 3                  | 2.89E-01 | 3                  | 2.89E-01 | 1                  | 3.14E-01 | 1                  | 3.14E-01 |
| GPSM2    | 1   | 1                  | 7.30E-01 | 1                  | 7.30E-01 | 1                  | 3.35E-01 | 1                  | 3.35E-01 | 1                  | 2.89E-01 | 1                  | 2.89E-01 |
| APBB3    | 5   | 6                  | 7.69E-01 | 6                  | 7.69E-01 | 5                  | 2.89E-01 | 5                  | 2.89E-01 | 3                  | 3.47E-01 | 3                  | 3.47E-01 |
| NINL     | 20  | 6                  | 5.68E-01 | 6                  | 5.68E-01 | 5                  | 2.90E-01 | 5                  | 2.90E-01 | 3                  | 5.28E-01 | 3                  | 5.28E-01 |
| RORC     | 1   | 1                  | 2.78E-01 | 1                  | 2.78E-01 | 1                  | 3.52E-01 | 1                  | 3.52E-01 | 1                  | 2.90E-01 | 1                  | 2.90E-01 |
| PDE11A   | 2   | 11                 | 3.21E-01 | 12                 | 1.16E-01 | 10                 | 2.90E-01 | 11                 | 3.13E-01 | 4                  | 8.37E-01 | 5                  | 1.00E+00 |
| ABCD4    | 14  | 5                  | 9.08E-01 | 5                  | 9.08E-01 | 4                  | 2.90E-01 | 4                  | 2.90E-01 | 4                  | 5.16E-01 | 4                  | 5.16E-01 |
| MS4A6A   | 11  | 1                  | 8.27E-02 | 1                  | 8.27E-02 | 1                  | 2.90E-01 | 1                  | 2.90E-01 |                    |          |                    |          |
| PITPNM1  | 11  | 4                  | 5.43E-01 | 4                  | 5.43E-01 | 2                  | 4.19E-01 | 2                  | 4.19E-01 | 3                  | 2.90E-01 | 3                  | 2.90E-01 |
| ASPM     | 1   | 16                 | 4.46E-01 | 16                 | 4.46E-01 | 14                 | 2.90E-01 | 14                 | 2.90E-01 | 5                  | 5.54E-01 | 5                  | 5.54E-01 |
| NBAS     | 2   | 7                  | 4.03E-02 | 7                  | 4.03E-02 | 6                  | 4.35E-01 | 6                  | 4.35E-01 | 3                  | 2.90E-01 | 3                  | 2.90E-01 |
| IQCE     | 7   | 4                  | 1.00E+00 | 4                  | 1.00E+00 | 3                  | 2.90E-01 | 3                  | 2.90E-01 | 4                  | 3.36E-01 | 4                  | 3.36E-01 |
| USP43    | 17  | 4                  | 1.70E-01 | 4                  | 1.70E-01 | 3                  | 2.90E-01 | 3                  | 2.90E-01 | 1                  | 6.28E-01 | 1                  | 6.28E-01 |
| KMT2D    | 12  | 14                 | 1.89E-01 | 14                 | 1.89E-01 | 8                  | 2.90E-01 | 8                  | 2.90E-01 | 6                  | 3.19E-01 | 6                  | 3.19E-01 |
| EPS8L2   | 11  | 3                  | 8.41E-01 | 3                  | 8.41E-01 | 3                  | 2.91E-01 | 3                  | 2.91E-01 | 2                  | 7.58E-01 | 2                  | 7.58E-01 |
| C9orf85  | 9   | 1                  | 7.56E-01 | 1                  | 7.56E-01 | 1                  | 2.91E-01 | 1                  | 2.91E-01 | 1                  | 4.57E-01 | 1                  | 4.57E-01 |
| KCNG4    | 16  | 4                  | 1.08E-01 | 5                  | 1.07E-01 | 5                  | 1.00E+00 | 6                  | 1.00E+00 | 4                  | 2.91E-01 | 5                  | 2.92E-01 |
| HAO2     | 1   | 2                  | 1.97E-01 | 2                  | 1.97E-01 | 1                  | 2.91E-01 | 1                  | 2.91E-01 | 2                  | 5.26E-01 | 2                  | 5.26E-01 |
| PTPN21   | 14  | 1                  | 3.37E-01 | 1                  | 3.37E-01 | 1                  | 5.47E-01 | 1                  | 5.47E-01 | 1                  | 2.91E-01 | 1                  | 2.91E-01 |
| ELMSAN1  | 14  | 2                  | 1.00E+00 | 2                  | 1.00E+00 | 2                  | 2.91E-01 | 2                  | 2.91E-01 | 2                  | 3.97E-01 | 2                  | 3.97E-01 |
| FBXW5    | 9   | 6                  | 4.13E-01 | 6                  | 4.13E-01 | 5                  | 2.92E-01 | 5                  | 2.92E-01 | 2                  | 6.55E-01 | 2                  | 6.55E-01 |
| DHRS12   | 13  | 5                  | 2.21E-01 | 5                  | 2.21E-01 | 5                  | 2.92E-01 | 5                  | 2.92E-01 | 1                  | 6.65E-01 | 1                  | 6.65E-01 |
| REV3L    | 6   | 7                  | 4.43E-01 | 7                  | 4.43E-01 | 8                  | 4.57E-01 | 8                  | 4.57E-01 | 3                  | 2.92E-01 | 3                  | 2.92E-01 |
| TMEM132B | 12  | 2                  | 1.17E-02 | 2                  | 1.17E-02 | 1                  | 4.57E-01 | 1                  | 4.57E-01 | 2                  | 2.92E-01 | 2                  | 2.92E-01 |
| APLP1    | 19  | 2                  | 2.11E-01 | 2                  | 2.11E-01 | 2                  | 2.92E-01 | 2                  | 2.92E-01 | 1                  | 1.00E+00 | 1                  | 1.00E+00 |
| MINA     | 3   | 4                  | 2.87E-01 | 4                  | 2.87E-01 | 4                  | 4.94E-01 | 4                  | 4.94E-01 | 2                  | 2.92E-01 | 2                  | 2.92E-01 |
| CEP83    | 12  | 3                  | 3.41E-01 | 4                  | 2.12E-01 | 2                  | 4.61E-01 | 3                  | 8.78E-01 | 1                  | 6.34E-01 | 2                  | 2.92E-01 |
| KNDC1    | 10  | 9                  | 3.07E-01 | 9                  | 3.07E-01 | 8                  | 7.06E-01 | 8                  | 7.06E-01 | 3                  | 2.92E-01 | 3                  | 2.92E-01 |
| GTPBP10  | 7   | 2                  | 7.26E-01 | 2                  | 7.26E-01 | 2                  | 2.92E-01 | 2                  | 2.92E-01 | 1                  | 4.86E-01 | 1                  | 4.86E-01 |
| SWSAP1   | 19  | 3                  | 1.70E-01 | 3                  | 1.70E-01 | 3                  | 2.92E-01 | 3                  | 2.92E-01 | 1                  | 6.45E-01 | 1                  | 6.45E-01 |
| CCDC86   | 11  | 4                  | 7.28E-01 | 4                  | 7.28E-01 | 5                  | 3.03E-01 | 5                  | 3.03E-01 | 3                  | 2.92E-01 | 3                  | 2.92E-01 |
| TRERF1   | 6   | 3                  | 2.15E-01 | 4                  | 7.97E-02 | 3                  | 3.34E-01 | 4                  | 2.92E-01 | 1                  | 6.43E-01 | 2                  | 8.73E-01 |
| OR1J1    | 9   | 1                  | 9.32E-01 | 1                  | 9.32E-01 | 1                  | 2.92E-01 | 1                  | 2.92E-01 | 1                  | 5.27E-01 | 1                  | 5.27E-01 |
| CASZ1    | 1   | 7                  | 1.69E-02 | 7                  | 1.69E-02 | 4                  | 5.84E-01 | 4                  | 5.84E-01 | 4                  | 2.93E-01 | 4                  | 2.93E-01 |
| ALDH4A1  | 1   | 4                  | 2.20E-01 | 4                  | 2.20E-01 | 4                  | 2.93E-01 | 4                  | 2.93E-01 | 1                  | 4.07E-01 | 1                  | 4.07E-01 |
| B3GNT3   | 19  | 2                  | 6.00E-01 | 2                  | 6.00E-01 | 2                  | 4.12E-01 | 2                  | 4.12E-01 | 1                  | 2.93E-01 | 1                  | 2.93E-01 |
| ZNF292   | 6   | 6                  | 3.38E-01 | 6                  | 3.38E-01 | 5                  | 3.02E-01 | 5                  | 3.02E-01 | 3                  | 2.93E-01 | 3                  | 2.93E-01 |
| TSPEAR   | 21  | 7                  | 2.80E-01 | 7                  | 2.80E-01 | 4                  | 4.64E-01 | 4                  | 4.64E-01 | 4                  | 2.93E-01 | 4                  | 2.93E-01 |
| MCTP2    | 15  | 7                  | 8.10E-01 | 7                  | 8.10E-01 | 6                  | 2.94E-01 | 6                  | 2.94E-01 | 4                  | 4.35E-01 | 4                  | 4.35E-01 |
| DYNC112  | 2   | 4                  | 4.53E-03 | 4                  | 4.53E-03 | 1                  | 5.37E-01 | 1                  | 5.37E-01 | 3                  | 2.94E-01 | 3                  | 2.94E-01 |
| TP53BP2  | 1   | 5                  | 3.98E-01 | 6                  | 6.06E-01 | 3                  | 5.68E-01 | 4                  | 2.94E-01 | 2                  | 6.55E-01 | 3                  | 3.43E-01 |
| AGAP3    | 7   | 4                  | 6.89E-01 | 4                  | 6.89E-01 | 3                  | 2.94E-01 | 3                  | 2.94E-01 | 3                  | 5.73E-01 | 3                  | 5.73E-01 |
| MYH8     | 17  | 14                 | 7.94E-01 | 14                 | 7.94E-01 | 13                 | 2.94E-01 | 13                 | 2.94E-01 | 9                  | 4.72E-01 | 9                  | 4.72E-01 |
| OR4D2    | 17  |                    |          | 2                  | 6.59E-01 |                    |          | 2                  | 2.94E-01 |                    |          | 2                  | 4.22E-01 |

| SetID     | Chr | ADEH- vs NA        |          |                    |          | ADEH+ vs ADEH-     |          |                    |          | ADEH+ vs NA        |          |                    |          |
|-----------|-----|--------------------|----------|--------------------|----------|--------------------|----------|--------------------|----------|--------------------|----------|--------------------|----------|
|           |     | rarenovel          |          | all                |          | rarenovel          |          | all                |          | rarenovel          |          | all                |          |
|           |     | N variants in test | p-value  | N variants in test | p-value  | N variants in test | p-value  | N variants in test | p-value  | N variants in test | p-value  | N variants in test | p-value  |
| CDK15     | 2   | 3                  | 5.92E-02 | 3                  | 5.92E-02 | 2                  | 2.94E-01 | 2                  | 2.94E-01 | 3                  | 1.00E+00 | 3                  | 1.00E+00 |
| DCC       | 18  | 4                  | 1.52E-01 | 4                  | 1.52E-01 | 2                  | 4.90E-01 | 2                  | 4.90E-01 | 4                  | 2.94E-01 | 4                  | 2.94E-01 |
| CD244     | 1   | 1                  | 7.32E-01 | 1                  | 7.32E-01 | 1                  | 2.94E-01 | 1                  | 2.94E-01 | 1                  | 4.54E-01 | 1                  | 4.54E-01 |
| FHL3      | 1   | 3                  | 1.50E-01 | 3                  | 1.50E-01 | 2                  | 4.71E-01 | 2                  | 4.71E-01 | 3                  | 2.94E-01 | 3                  | 2.94E-01 |
| TBX1      | 22  | 1                  | 7.47E-01 | 2                  | 7.90E-01 | 1                  | 4.74E-01 | 2                  | 4.94E-01 |                    |          | 1                  | 2.94E-01 |
| C10orf120 | 10  | 1                  | 6.48E-01 | 1                  | 6.48E-01 | 1                  | 4.66E-01 | 1                  | 4.66E-01 | 1                  | 2.94E-01 | 1                  | 2.94E-01 |
| DCDC2     | 6   | 1                  | 4.81E-01 | 1                  | 4.81E-01 | 1                  | 4.09E-01 | 1                  | 4.09E-01 | 1                  | 2.94E-01 | 1                  | 2.94E-01 |
| HSF5      | 17  | 1                  | 3.11E-01 | 1                  | 3.11E-01 | 1                  | 7.29E-01 | 1                  | 7.29E-01 | 1                  | 2.94E-01 | 1                  | 2.94E-01 |
| HTR3B     | 11  | 2                  | 5.77E-01 | 2                  | 5.77E-01 | 2                  | 2.94E-01 | 2                  | 2.94E-01 | 2                  | 1.00E+00 | 2                  | 1.00E+00 |
| RLF       | 1   | 6                  | 5.10E-01 | 6                  | 5.10E-01 | 4                  | 6.30E-01 | 4                  | 6.30E-01 | 4                  | 2.95E-01 | 4                  | 2.95E-01 |
| ZBTB7C    | 18  | 1                  | 9.19E-01 | 1                  | 9.19E-01 | 1                  | 2.95E-01 | 1                  | 2.95E-01 | 1                  | 3.27E-01 | 1                  | 3.27E-01 |
| ZNF124    | 1   | 3                  | 4.92E-01 | 3                  | 4.92E-01 | 2                  | 4.20E-01 | 2                  | 4.20E-01 | 2                  | 2.95E-01 | 2                  | 2.95E-01 |
| ANXA11    | 10  | 4                  | 5.21E-01 | 5                  | 5.21E-01 | 5                  | 2.95E-01 | 6                  | 2.95E-01 | 4                  | 4.65E-01 | 5                  | 4.65E-01 |
| MMP1      | 11  | 6                  | 8.44E-01 | 6                  | 8.44E-01 | 5                  | 3.08E-01 | 5                  | 3.08E-01 | 4                  | 2.95E-01 | 4                  | 2.95E-01 |
| TSPAN32   | 11  | 3                  | 5.77E-01 | 3                  | 5.77E-01 | 3                  | 2.95E-01 | 3                  | 2.95E-01 | 1                  | 3.45E-01 | 1                  | 3.45E-01 |
| TRAK1     | 3   | 4                  | 5.27E-01 | 4                  | 5.27E-01 | 4                  | 2.96E-01 | 4                  | 2.96E-01 | 1                  | 4.54E-01 | 1                  | 4.54E-01 |
| AREL1     | 14  | 4                  | 7.02E-01 | 4                  | 7.02E-01 | 4                  | 4.37E-01 | 4                  | 4.37E-01 | 2                  | 2.96E-01 | 2                  | 2.96E-01 |
| NLRP4     | 19  | 5                  | 6.95E-01 | 5                  | 6.95E-01 | 4                  | 2.96E-01 | 4                  | 2.96E-01 | 2                  | 3.13E-01 | 2                  | 3.13E-01 |
| SEC14L4   | 22  | 4                  | 2.40E-01 | 5                  | 2.43E-01 | 3                  | 2.96E-01 | 4                  | 2.96E-01 | 5                  | 3.69E-01 | 6                  | 3.69E-01 |
| NISCH     | 3   | 3                  | 4.93E-01 | 3                  | 4.93E-01 | 2                  | 4.09E-01 | 2                  | 4.09E-01 | 3                  | 2.96E-01 | 3                  | 2.96E-01 |
| TROAP     | 12  | 2                  | 3.01E-01 | 2                  | 3.01E-01 | 2                  | 2.96E-01 | 2                  | 2.96E-01 | 1                  | 5.82E-01 | 1                  | 5.82E-01 |
| RGL4      | 22  | 4                  | 1.51E-01 | 4                  | 1.51E-01 | 2                  | 4.91E-01 | 2                  | 4.91E-01 | 3                  | 2.96E-01 | 3                  | 2.96E-01 |
| OR5M9     | 11  | 3                  | 8.24E-01 | 4                  | 7.55E-01 | 3                  | 4.46E-01 | 4                  | 5.77E-01 | 1                  | 2.96E-01 | 2                  | 3.31E-01 |
| NRP2      | 2   | 4                  | 9.88E-02 | 4                  | 9.88E-02 | 2                  | 5.33E-01 | 2                  | 5.33E-01 | 4                  | 2.96E-01 | 4                  | 2.96E-01 |
| C1orf168  | 1   | 6                  | 6.07E-02 | 6                  | 6.07E-02 | 6                  | 2.96E-01 | 6                  | 2.96E-01 | 6                  | 4.47E-01 | 6                  | 4.47E-01 |
| TBX10     | 11  | 2                  | 2.62E-01 | 3                  | 2.61E-01 | 1                  | 3.48E-01 | 2                  | 3.49E-01 | 2                  | 2.96E-01 | 3                  | 2.96E-01 |
| VPS41     | 7   | 4                  | 5.30E-01 | 5                  | 6.62E-01 | 4                  | 3.26E-01 | 5                  | 2.96E-01 | 2                  | 5.16E-01 | 3                  | 4.13E-01 |
| PAQR5     | 15  | 1                  | 1.00E+00 | 1                  | 1.00E+00 | 1                  | 1.00E+00 | 1                  | 1.00E+00 | 1                  | 2.96E-01 | 1                  | 2.96E-01 |
| PTPRR     | 12  | 5                  | 2.62E-01 | 5                  | 2.62E-01 | 3                  | 2.96E-01 | 3                  | 2.96E-01 | 3                  | 5.03E-01 | 3                  | 5.03E-01 |
| CYFIP2    | 5   | 2                  | 2.84E-01 | 2                  | 2.84E-01 | 2                  | 2.96E-01 | 2                  | 2.96E-01 | 1                  | 4.55E-01 | 1                  | 4.55E-01 |
| CEP89     | 19  | 2                  | 2.60E-01 | 4                  | 3.45E-01 | 2                  | 7.79E-01 | 4                  | 1.00E+00 | 2                  | 2.96E-01 | 4                  | 5.56E-01 |
| TBX5      | 12  | 1                  | 1.00E+00 | 1                  | 1.00E+00 | 1                  | 2.96E-01 | 1                  | 2.96E-01 | 1                  | 4.48E-01 | 1                  | 4.48E-01 |
| UIMC1     | 5   | 4                  | 7.16E-01 | 5                  | 7.17E-01 | 3                  | 3.00E-01 | 4                  | 2.97E-01 | 3                  | 3.57E-01 | 4                  | 3.46E-01 |
| NBN       | 8   | 6                  | 5.81E-01 | 6                  | 5.81E-01 | 5                  | 2.97E-01 | 5                  | 2.97E-01 | 2                  | 3.23E-01 | 2                  | 3.23E-01 |
| IL16      | 15  | 5                  | 2.15E-01 | 5                  | 2.15E-01 | 5                  | 1.00E+00 | 5                  | 1.00E+00 | 1                  | 2.97E-01 | 1                  | 2.97E-01 |
| CYP4F11   | 19  | 2                  | 7.22E-01 | 2                  | 7.22E-01 | 1                  | 2.97E-01 | 1                  | 2.97E-01 | 2                  | 4.89E-01 | 2                  | 4.89E-01 |
| LIPM      | 10  | 1                  | 3.15E-01 | 1                  | 3.15E-01 | 1                  | 2.98E-01 | 1                  | 2.98E-01 | 1                  | 6.04E-01 | 1                  | 6.04E-01 |
| MYLK      | 3   | 2                  | 6.12E-02 | 2                  | 6.12E-02 | 2                  | 2.98E-01 | 2                  | 2.98E-01 | 1                  | 1.00E+00 | 1                  | 1.00E+00 |
| HERC6     | 4   | 5                  | 5.38E-01 | 5                  | 5.38E-01 | 3                  | 3.59E-01 | 3                  | 3.59E-01 | 4                  | 2.98E-01 | 4                  | 2.98E-01 |
| DUSP13    | 10  | 6                  | 2.93E-01 | 6                  | 2.93E-01 | 7                  | 3.38E-01 | 7                  | 3.38E-01 | 3                  | 2.98E-01 | 3                  | 2.98E-01 |
| SLC46A3   | 13  | 3                  | 1.05E-01 | 3                  | 1.05E-01 | 3                  | 2.98E-01 | 3                  | 2.98E-01 | 1                  | 1.00E+00 | 1                  | 1.00E+00 |
| FASN      | 17  | 9                  | 3.11E-01 | 9                  | 3.11E-01 | 8                  | 5.95E-01 | 8                  | 5.95E-01 | 3                  | 2.98E-01 | 3                  | 2.98E-01 |
| PRUNE2    | 9   | 10                 | 4.70E-01 | 10                 | 4.70E-01 | 8                  | 2.98E-01 | 8                  | 2.98E-01 | 7                  | 5.46E-01 | 7                  | 5.46E-01 |
| WDR27     | 6   | 7                  | 1.27E-01 | 7                  | 1.27E-01 | 4                  | 3.47E-01 | 4                  | 3.47E-01 | 4                  | 2.98E-01 | 4                  | 2.98E-01 |
| BCAR1     | 16  | 6                  | 3.44E-01 | 6                  | 3.44E-01 | 6                  | 2.98E-01 | 6                  | 2.98E-01 | 2                  | 4.49E-01 | 2                  | 4.49E-01 |
| DLC1      | 8   | 5                  | 6.93E-01 | 5                  | 6.93E-01 | 6                  | 4.02E-01 | 6                  | 4.02E-01 | 3                  | 2.98E-01 | 3                  | 2.98E-01 |
| PLEC      | 8   | 36                 | 3.43E-01 | 36                 | 3.43E-01 | 29                 | 8.13E-01 | 29                 | 8.13E-01 | 16                 | 2.98E-01 | 16                 | 2.98E-01 |
| CCDC7     | 10  | 6                  | 2.59E-01 | 6                  | 2.59E-01 | 5                  | 4.00E-01 | 5                  | 4.00E-01 | 3                  | 2.98E-01 | 3                  | 2.98E-01 |

| SetID   | Chr | ADEH- vs NA        |          |                    |          | ADEH+ vs ADEH-     |          |                    |          | ADEH+ vs NA        |          |                    |          |
|---------|-----|--------------------|----------|--------------------|----------|--------------------|----------|--------------------|----------|--------------------|----------|--------------------|----------|
|         |     | rarenovel          |          | all                |          | rarenovel          |          | all                |          | rarenovel          |          | all                |          |
|         |     | N variants in test | p-value  | N variants in test | p-value  | N variants in test | p-value  | N variants in test | p-value  | N variants in test | p-value  | N variants in test | p-value  |
| MED24   | 17  | 2                  | 9.95E-02 | 2                  | 9.95E-02 | 2                  | 2.99E-01 | 2                  | 2.99E-01 | 1                  | 6.43E-01 | 1                  | 6.43E-01 |
| FLRT1   | 11  | 5                  | 7.69E-01 | 5                  | 7.69E-01 | 5                  | 2.99E-01 | 5                  | 2.99E-01 | 2                  | 4.37E-01 | 2                  | 4.37E-01 |
| LTF     | 3   | 11                 | 8.33E-01 | 11                 | 8.33E-01 | 9                  | 2.99E-01 | 9                  | 2.99E-01 | 3                  | 3.54E-01 | 3                  | 3.54E-01 |
| CNTN5   | 11  | 5                  | 4.02E-02 | 5                  | 4.02E-02 | 1                  | 1.00E+00 | 1                  | 1.00E+00 | 5                  | 2.99E-01 | 5                  | 2.99E-01 |
| CHRNB4  | 15  | 4                  | 1.87E-01 | 4                  | 1.87E-01 | 3                  | 3.36E-01 | 3                  | 3.36E-01 | 3                  | 2.99E-01 | 3                  | 2.99E-01 |
| PLA2G3  | 22  | 3                  | 5.66E-01 | 4                  | 7.82E-01 | 3                  | 4.71E-01 | 4                  | 5.05E-01 | 1                  | 4.57E-01 | 2                  | 3.00E-01 |
| SIPA1L3 | 19  | 6                  | 4.93E-01 | 7                  | 2.84E-02 | 6                  | 5.48E-01 | 7                  | 3.02E-01 | 1                  | 3.00E-01 | 2                  | 5.75E-01 |
| HIGD1C  | 12  | 2                  | 1.00E-01 | 2                  | 1.00E-01 | 2                  | 3.00E-01 | 2                  | 3.00E-01 | 1                  | 6.29E-01 | 1                  | 6.29E-01 |
| SHQ1    | 3   | 3                  | 1.14E-01 | 3                  | 1.14E-01 | 2                  | 3.00E-01 | 2                  | 3.00E-01 | 2                  | 1.00E+00 | 2                  | 1.00E+00 |
| PLEKHS1 | 10  | 3                  | 4.55E-01 | 3                  | 4.55E-01 | 2                  | 4.07E-01 | 2                  | 4.07E-01 | 2                  | 3.00E-01 | 2                  | 3.00E-01 |
| ZFAND4  | 10  | 7                  | 7.60E-01 | 7                  | 7.60E-01 | 6                  | 3.35E-01 | 6                  | 3.35E-01 | 3                  | 3.00E-01 | 3                  | 3.00E-01 |
| FNDC1   | 6   | 9                  | 1.43E-01 | 9                  | 1.43E-01 | 6                  | 6.61E-01 | 6                  | 6.61E-01 | 7                  | 3.00E-01 | 7                  | 3.00E-01 |
| PSD     | 10  | 2                  | 8.17E-01 | 2                  | 8.17E-01 | 3                  | 3.15E-01 | 3                  | 3.15E-01 | 2                  | 3.00E-01 | 2                  | 3.00E-01 |
| TTI2    | 8   | 3                  | 7.89E-01 | 3                  | 7.89E-01 | 2                  | 3.00E-01 | 2                  | 3.00E-01 | 2                  | 4.19E-01 | 2                  | 4.19E-01 |
| DPH1    | 17  | 2                  | 1.58E-01 | 2                  | 1.58E-01 | 2                  | 3.01E-01 | 2                  | 3.01E-01 | 1                  | 6.33E-01 | 1                  | 6.33E-01 |
| DHTKD1  | 10  | 5                  | 7.53E-02 | 5                  | 7.53E-02 | 3                  | 4.70E-01 | 3                  | 4.70E-01 | 3                  | 3.01E-01 | 3                  | 3.01E-01 |
| DSC3    | 18  | 6                  | 8.79E-01 | 6                  | 8.79E-01 | 6                  | 3.38E-01 | 6                  | 3.38E-01 | 4                  | 3.01E-01 | 4                  | 3.01E-01 |
| ANKRD55 | 5   | 4                  | 2.46E-01 | 4                  | 2.46E-01 | 2                  | 3.18E-01 | 2                  | 3.18E-01 | 3                  | 3.01E-01 | 3                  | 3.01E-01 |
| ZNF571  | 19  | 8                  | 3.64E-01 | 9                  | 3.53E-01 | 6                  | 4.56E-01 | 7                  | 4.34E-01 | 4                  | 3.12E-01 | 5                  | 3.01E-01 |
| COL12A1 | 6   | 10                 | 4.65E-01 | 10                 | 4.65E-01 | 8                  | 3.01E-01 | 8                  | 3.01E-01 | 6                  | 3.90E-01 | 6                  | 3.90E-01 |
| SPOCK2  | 10  | 3                  | 5.10E-01 | 3                  | 5.10E-01 | 2                  | 5.17E-01 | 2                  | 5.17E-01 | 2                  | 3.01E-01 | 2                  | 3.01E-01 |
| ECHDC2  | 1   | 1                  | 1.00E+00 | 1                  | 1.00E+00 | 1                  | 3.01E-01 | 1                  | 3.01E-01 | 1                  | 3.24E-01 | 1                  | 3.24E-01 |
| TONSL   | 8   | 6                  | 5.21E-01 | 6                  | 5.21E-01 | 4                  | 4.33E-01 | 4                  | 4.33E-01 | 4                  | 3.02E-01 | 4                  | 3.02E-01 |
| ANO2    | 12  | 5                  | 1.19E-01 | 5                  | 1.19E-01 | 5                  | 1.00E+00 | 5                  | 1.00E+00 | 1                  | 3.02E-01 | 1                  | 3.02E-01 |
| KIF19   | 17  | 6                  | 1.20E-01 | 7                  | 2.09E-01 | 6                  | 3.02E-01 | 7                  | 4.72E-01 | 1                  | 6.00E-01 | 2                  | 7.42E-01 |
| ZNF516  | 18  | 5                  | 6.24E-01 | 5                  | 6.24E-01 | 5                  | 3.02E-01 | 5                  | 3.02E-01 | 4                  | 3.92E-01 | 4                  | 3.92E-01 |
| TOPORS  | 9   | 1                  | 6.56E-01 | 1                  | 6.56E-01 | 1                  | 3.02E-01 | 1                  | 3.02E-01 | 1                  | 4.49E-01 | 1                  | 4.49E-01 |
| EFCAB6  | 22  | 4                  | 7.28E-01 | 4                  | 7.28E-01 | 2                  | 3.02E-01 | 2                  | 3.02E-01 | 3                  | 3.32E-01 | 3                  | 3.32E-01 |
| NDUFA9  | 12  | 1                  | 1.47E-01 | 1                  | 1.47E-01 | 1                  | 1.00E+00 | 1                  | 1.00E+00 | 1                  | 3.02E-01 | 1                  | 3.02E-01 |
| CALCA   | 11  | 1                  | 7.49E-01 | 1                  | 7.49E-01 | 1                  | 3.02E-01 | 1                  | 3.02E-01 | 1                  | 6.06E-01 | 1                  | 6.06E-01 |
| SH3D19  | 4   | 8                  | 2.13E-01 | 8                  | 2.13E-01 | 4                  | 3.02E-01 | 4                  | 3.02E-01 | 7                  | 5.84E-01 | 7                  | 5.84E-01 |
| ZNF141  | 4   | 3                  | 7.09E-02 | 3                  | 7.09E-02 | 2                  | 7.61E-01 | 2                  | 7.61E-01 | 2                  | 3.02E-01 | 2                  | 3.02E-01 |
| NCAPD3  | 11  | 7                  | 2.30E-01 | 7                  | 2.30E-01 | 7                  | 3.03E-01 | 7                  | 3.03E-01 | 2                  | 6.51E-01 | 2                  | 6.51E-01 |
| ATM     | 11  | 12                 | 2.51E-01 | 12                 | 2.51E-01 | 11                 | 3.03E-01 | 11                 | 3.03E-01 | 6                  | 5.00E-01 | 6                  | 5.00E-01 |
| OR52E6  | 11  | 5                  | 9.03E-01 | 5                  | 9.03E-01 | 5                  | 3.03E-01 | 5                  | 3.03E-01 | 3                  | 3.52E-01 | 3                  | 3.52E-01 |
| MX2     | 21  | 3                  | 7.57E-01 | 3                  | 7.57E-01 | 2                  | 3.03E-01 | 2                  | 3.03E-01 | 2                  | 3.97E-01 | 2                  | 3.97E-01 |
| NANS    | 9   | 1                  | 1.06E-01 | 1                  | 1.06E-01 | 1                  | 3.03E-01 | 1                  | 3.03E-01 |                    |          |                    |          |
| CLPTM1L | 5   | 1                  | 2.92E-01 | 1                  | 2.92E-01 | 1                  | 3.03E-01 | 1                  | 3.03E-01 | 1                  | 6.52E-01 | 1                  | 6.52E-01 |
| TGM7    | 15  | 4                  | 1.92E-01 | 4                  | 1.92E-01 | 3                  | 3.03E-01 | 3                  | 3.03E-01 | 3                  | 8.40E-01 | 3                  | 8.40E-01 |
| USP25   | 21  | 4                  | 4.23E-01 | 4                  | 4.23E-01 | 3                  | 3.03E-01 | 3                  | 3.03E-01 | 2                  | 6.43E-01 | 2                  | 6.43E-01 |
| DNAH1   | 3   | 25                 | 2.69E-01 | 27                 | 3.56E-01 | 19                 | 3.04E-01 | 21                 | 4.80E-01 | 14                 | 4.89E-01 | 16                 | 6.36E-01 |
| GLI2    | 2   | 4                  | 1.91E-01 | 4                  | 1.91E-01 | 4                  | 3.04E-01 | 4                  | 3.04E-01 | 1                  | 4.55E-01 | 1                  | 4.55E-01 |
| TTC14   | 3   | 6                  | 5.24E-01 | 6                  | 5.24E-01 | 6                  | 6.79E-01 | 6                  | 6.79E-01 | 1                  | 3.04E-01 | 1                  | 3.04E-01 |
| VPS16   | 20  | 3                  | 7.40E-01 | 3                  | 7.40E-01 | 3                  | 3.04E-01 | 3                  | 3.04E-01 | 1                  | 3.65E-01 | 1                  | 3.65E-01 |
| CFAP206 | 6   | 9                  | 8.60E-02 | 10                 | 8.27E-02 | 7                  | 3.04E-01 | 8                  | 3.25E-01 | 6                  | 7.25E-01 | 7                  | 7.33E-01 |
| OTOG    | 11  | 8                  | 7.49E-01 | 8                  | 7.49E-01 | 6                  | 3.04E-01 | 6                  | 3.04E-01 | 5                  | 3.63E-01 | 5                  | 3.63E-01 |
| OR10C1  | 6   | 1                  | 4.61E-01 | 1                  | 4.61E-01 | 1                  | 3.04E-01 | 1                  | 3.04E-01 | 1                  | 1.00E+00 | 1                  | 1.00E+00 |
| SLC2A7  | 1   | 6                  | 8.71E-01 | 6                  | 8.71E-01 | 4                  | 3.04E-01 | 4                  | 3.04E-01 | 5                  | 3.06E-01 | 5                  | 3.06E-01 |



| SetID     | Chr | ADEH- vs NA        |          |                    |          | ADEH+ vs ADEH-     |          |                    |          | ADEH+ vs NA        |          |                    |          |
|-----------|-----|--------------------|----------|--------------------|----------|--------------------|----------|--------------------|----------|--------------------|----------|--------------------|----------|
|           |     | rarenovel          |          | all                |          | rarenovel          |          | all                |          | rarenovel          |          | all                |          |
|           |     | N variants in test | p-value  | N variants in test | p-value  | N variants in test | p-value  | N variants in test | p-value  | N variants in test | p-value  | N variants in test | p-value  |
| SMYD5     | 2   | 3                  | 7.79E-01 | 3                  | 7.79E-01 | 2                  | 3.04E-01 | 2                  | 3.04E-01 | 2                  | 4.31E-01 | 2                  | 4.31E-01 |
| ADORA3    | 1   | 1                  | 4.15E-01 | 2                  | 4.76E-01 | 1                  | 4.47E-01 | 2                  | 5.15E-01 | 1                  | 3.05E-01 | 1                  | 3.05E-01 |
| DSG2      | 18  | 5                  | 5.78E-01 | 6                  | 7.61E-01 | 4                  | 3.68E-01 | 5                  | 3.05E-01 | 2                  | 6.42E-01 | 3                  | 4.26E-01 |
| ZFHX4     | 8   | 8                  | 8.85E-01 | 8                  | 8.85E-01 | 6                  | 3.05E-01 | 6                  | 3.05E-01 | 3                  | 3.78E-01 | 3                  | 3.78E-01 |
| LRRC29    | 16  | 1                  | 5.43E-01 | 1                  | 5.43E-01 | 1                  | 4.83E-01 | 1                  | 4.83E-01 | 1                  | 3.05E-01 | 1                  | 3.05E-01 |
| ADCY7     | 16  | 2                  | 5.22E-01 | 2                  | 5.22E-01 | 2                  | 3.06E-01 | 2                  | 3.06E-01 | 2                  | 3.58E-01 | 2                  | 3.58E-01 |
| SMC5      | 9   | 4                  | 2.39E-02 | 4                  | 2.39E-02 | 3                  | 8.34E-01 | 3                  | 8.34E-01 | 2                  | 3.06E-01 | 2                  | 3.06E-01 |
| GPATCH2L  | 14  | 2                  | 7.19E-01 | 2                  | 7.19E-01 | 2                  | 3.06E-01 | 2                  | 3.06E-01 | 1                  | 3.44E-01 | 1                  | 3.44E-01 |
| ORC1      | 1   | 2                  | 8.32E-01 | 2                  | 8.32E-01 | 2                  | 3.06E-01 | 2                  | 3.06E-01 | 1                  | 3.53E-01 | 1                  | 3.53E-01 |
| PLEKHG5   | 1   | 8                  | 1.53E-01 | 8                  | 1.53E-01 | 8                  | 3.06E-01 | 8                  | 3.06E-01 | 1                  | 4.48E-01 | 1                  | 4.48E-01 |
| LZTS1     | 8   | 6                  | 6.34E-01 | 6                  | 6.34E-01 | 5                  | 3.06E-01 | 5                  | 3.06E-01 | 4                  | 7.14E-01 | 4                  | 7.14E-01 |
| KLK2      | 19  | 1                  | 7.75E-01 | 1                  | 7.75E-01 | 1                  | 3.06E-01 | 1                  | 3.06E-01 | 1                  | 4.48E-01 | 1                  | 4.48E-01 |
| CD300LG   | 17  | 2                  | 2.23E-01 | 2                  | 2.23E-01 | 2                  | 3.06E-01 | 2                  | 3.06E-01 | 1                  | 6.69E-01 | 1                  | 6.69E-01 |
| LTBP2     | 14  | 10                 | 5.34E-02 | 10                 | 5.34E-02 | 9                  | 5.71E-01 | 9                  | 5.71E-01 | 4                  | 3.06E-01 | 4                  | 3.06E-01 |
| FAM179B   | 14  | 6                  | 8.89E-01 | 6                  | 8.89E-01 | 5                  | 3.06E-01 | 5                  | 3.06E-01 | 2                  | 4.61E-01 | 2                  | 4.61E-01 |
| SLC5A9    | 1   | 4                  | 4.01E-01 | 5                  | 4.03E-01 | 3                  | 3.06E-01 | 4                  | 3.31E-01 | 2                  | 6.28E-01 | 3                  | 7.19E-01 |
| SART1     | 11  | 4                  | 4.41E-02 | 4                  | 4.41E-02 | 4                  | 5.29E-01 | 4                  | 5.29E-01 | 2                  | 3.07E-01 | 2                  | 3.07E-01 |
| ZNF597    | 16  | 1                  | 4.12E-01 | 1                  | 4.12E-01 | 1                  | 4.32E-01 | 1                  | 4.32E-01 | 1                  | 3.07E-01 | 1                  | 3.07E-01 |
| PTPRZ1    | 7   | 5                  | 6.07E-01 | 5                  | 6.07E-01 | 3                  | 3.59E-01 | 3                  | 3.59E-01 | 3                  | 3.07E-01 | 3                  | 3.07E-01 |
| TRPM3     | 9   | 7                  | 1.02E-01 | 7                  | 1.02E-01 | 3                  | 3.07E-01 | 3                  | 3.07E-01 | 5                  | 1.00E+00 | 5                  | 1.00E+00 |
| COMMD8    | 4   | 2                  | 3.72E-01 | 2                  | 3.72E-01 | 2                  | 1.00E+00 | 2                  | 1.00E+00 | 1                  | 3.07E-01 | 1                  | 3.07E-01 |
| CKAP2     | 13  | 4                  | 5.85E-01 | 4                  | 5.85E-01 | 4                  | 4.83E-01 | 4                  | 4.83E-01 | 1                  | 3.07E-01 | 1                  | 3.07E-01 |
| CREM      | 10  | 1                  | 7.71E-01 | 1                  | 7.71E-01 | 1                  | 3.07E-01 | 1                  | 3.07E-01 | 1                  | 3.13E-01 | 1                  | 3.13E-01 |
| AARS2     | 6   |                    |          | 1                  | 1.51E-01 |                    |          | 1                  | 3.07E-01 |                    |          | 1                  | 1.00E+00 |
| FKBP15    | 9   | 4                  | 6.67E-01 | 4                  | 6.67E-01 | 3                  | 3.07E-01 | 3                  | 3.07E-01 | 3                  | 4.84E-01 | 3                  | 4.84E-01 |
| GNGT2     | 17  | 1                  | 1.00E+00 | 1                  | 1.00E+00 | 1                  | 3.07E-01 | 1                  | 3.07E-01 | 1                  | 4.30E-01 | 1                  | 4.30E-01 |
| OR4F15    | 15  | 1                  | 1.00E+00 | 1                  | 1.00E+00 | 1                  | 3.08E-01 | 1                  | 3.08E-01 | 1                  | 4.51E-01 | 1                  | 4.51E-01 |
| SENP5     | 3   | 2                  | 8.39E-02 | 2                  | 8.39E-02 | 1                  | 3.08E-01 | 1                  | 3.08E-01 | 1                  | 6.00E-01 | 1                  | 6.00E-01 |
| NIPSNAP3B | 9   | 2                  | 7.02E-01 | 4                  | 6.14E-01 | 2                  | 4.38E-01 | 4                  | 4.23E-01 | 1                  | 3.08E-01 | 3                  | 3.51E-01 |
| SELE      | 1   | 1                  | 7.49E-01 | 2                  | 5.79E-01 | 1                  | 4.83E-01 | 2                  | 4.51E-01 |                    |          | 1                  | 3.08E-01 |
| COL9A1    | 6   | 3                  | 3.10E-01 | 3                  | 3.10E-01 | 2                  | 3.08E-01 | 2                  | 3.08E-01 | 2                  | 6.41E-01 | 2                  | 6.41E-01 |
| ZNF414    | 19  |                    |          | 1                  | 6.54E-01 |                    |          | 1                  | 4.15E-01 |                    |          | 1                  | 3.08E-01 |
| DSC1      | 18  | 4                  | 7.02E-02 | 4                  | 7.02E-02 | 4                  | 3.08E-01 | 4                  | 3.08E-01 |                    |          |                    |          |
| RNF215    | 22  | 3                  | 5.35E-01 | 3                  | 5.35E-01 | 3                  | 3.40E-01 | 3                  | 3.40E-01 | 3                  | 3.08E-01 | 3                  | 3.08E-01 |
| LILRB3    | 19  | 2                  | 3.40E-01 | 2                  | 3.40E-01 | 1                  | 4.53E-01 | 1                  | 4.53E-01 | 1                  | 3.08E-01 | 1                  | 3.08E-01 |
| SPG7      | 16  | 3                  | 8.14E-01 | 3                  | 8.14E-01 | 3                  | 3.52E-01 | 3                  | 3.52E-01 | 3                  | 3.08E-01 | 3                  | 3.08E-01 |
| KIAA0226L | 13  | 2                  | 5.43E-01 | 2                  | 5.43E-01 | 2                  | 5.49E-01 | 2                  | 5.49E-01 | 1                  | 3.08E-01 | 1                  | 3.08E-01 |
| ERAP2     | 5   | 9                  | 6.35E-01 | 10                 | 7.23E-01 | 9                  | 3.09E-01 | 10                 | 6.07E-01 | 4                  | 3.20E-01 | 5                  | 4.36E-01 |
| ZNF883    | 9   | 3                  | 1.99E-02 | 3                  | 1.99E-02 | 3                  | 1.00E+00 | 3                  | 1.00E+00 | 2                  | 3.09E-01 | 2                  | 3.09E-01 |
| ABCA6     | 17  | 3                  | 1.13E-01 | 3                  | 1.13E-01 | 4                  | 3.09E-01 | 4                  | 3.09E-01 | 4                  | 6.18E-01 | 4                  | 6.18E-01 |
| SOAT2     | 12  | 6                  | 5.50E-01 | 6                  | 5.50E-01 | 5                  | 3.09E-01 | 5                  | 3.09E-01 | 2                  | 6.49E-01 | 2                  | 6.49E-01 |
| FAM175A   | 4   | 1                  | 8.94E-01 | 1                  | 8.94E-01 | 1                  | 3.09E-01 | 1                  | 3.09E-01 | 1                  | 3.65E-01 | 1                  | 3.65E-01 |
| NPAT      | 11  | 6                  | 8.31E-01 | 7                  | 8.16E-01 | 5                  | 3.56E-01 | 6                  | 3.78E-01 | 3                  | 3.09E-01 | 4                  | 3.23E-01 |
| CAND2     | 3   | 10                 | 8.51E-01 | 10                 | 8.51E-01 | 9                  | 3.19E-01 | 9                  | 3.19E-01 | 3                  | 3.10E-01 | 3                  | 3.10E-01 |
| IQGAP3    | 1   | 8                  | 4.13E-02 | 9                  | 4.13E-02 | 4                  | 5.61E-01 | 5                  | 5.61E-01 | 6                  | 3.10E-01 | 7                  | 3.10E-01 |
| CACNA1H   | 16  | 5                  | 4.90E-01 | 6                  | 4.90E-01 | 6                  | 4.07E-01 | 7                  | 4.07E-01 | 3                  | 3.10E-01 | 4                  | 3.10E-01 |
| AFAP1     | 4   | 7                  | 9.30E-02 | 8                  | 8.15E-02 | 3                  | 8.32E-01 | 4                  | 8.43E-01 | 6                  | 3.22E-01 | 7                  | 3.10E-01 |
| PADI2     | 1   | 3                  | 4.18E-01 | 3                  | 4.18E-01 | 3                  | 3.10E-01 | 3                  | 3.10E-01 | 1                  | 4.33E-01 | 1                  | 4.33E-01 |

| SetID     | Chr | ADEH- vs NA        |          |                    |          | ADEH+ vs ADEH-     |          |                    |          | ADEH+ vs NA        |          |                    |          |
|-----------|-----|--------------------|----------|--------------------|----------|--------------------|----------|--------------------|----------|--------------------|----------|--------------------|----------|
|           |     | rarenovel          |          | all                |          | rarenovel          |          | all                |          | rarenovel          |          | all                |          |
|           |     | N variants in test | p-value  | N variants in test | p-value  | N variants in test | p-value  | N variants in test | p-value  | N variants in test | p-value  | N variants in test | p-value  |
| ZFP37     | 9   | 6                  | 2.79E-01 | 6                  | 2.79E-01 | 5                  | 3.11E-01 | 5                  | 3.11E-01 | 2                  | 6.34E-01 | 2                  | 6.34E-01 |
| SH3RF2    | 5   | 7                  | 2.14E-01 | 7                  | 2.14E-01 | 5                  | 3.52E-01 | 5                  | 3.52E-01 | 4                  | 3.11E-01 | 4                  | 3.11E-01 |
| ZSCAN5B   | 19  | 4                  | 1.91E-01 | 4                  | 1.91E-01 | 2                  | 5.35E-01 | 2                  | 5.35E-01 | 3                  | 3.11E-01 | 3                  | 3.11E-01 |
| TRMT61B   | 2   | 3                  | 5.85E-01 | 3                  | 5.85E-01 | 3                  | 3.11E-01 | 3                  | 3.11E-01 | 2                  | 4.71E-01 | 2                  | 4.71E-01 |
| PCDH1     | 5   | 3                  | 2.62E-01 | 3                  | 2.62E-01 | 3                  | 3.11E-01 | 3                  | 3.11E-01 | 1                  | 5.77E-01 | 1                  | 5.77E-01 |
| CSPP1     | 8   | 4                  | 7.36E-01 | 4                  | 7.36E-01 | 2                  | 3.57E-01 | 2                  | 3.57E-01 | 3                  | 3.11E-01 | 3                  | 3.11E-01 |
| C1orf116  | 1   | 2                  | 7.10E-03 | 2                  | 7.10E-03 |                    |          |                    |          | 2                  | 3.11E-01 | 2                  | 3.11E-01 |
| MTMR4     | 17  | 1                  | 3.04E-01 | 1                  | 3.04E-01 | 1                  | 3.11E-01 | 1                  | 3.11E-01 | 1                  | 6.51E-01 | 1                  | 6.51E-01 |
| CD274     | 9   | 1                  | 3.82E-01 | 1                  | 3.82E-01 | 1                  | 1.00E+00 | 1                  | 1.00E+00 | 1                  | 3.12E-01 | 1                  | 3.12E-01 |
| NIN       | 14  | 6                  | 3.18E-01 | 6                  | 3.18E-01 | 3                  | 4.28E-01 | 3                  | 4.28E-01 | 4                  | 3.12E-01 | 4                  | 3.12E-01 |
| KIAA1324L | 7   | 6                  | 2.11E-01 | 6                  | 2.11E-01 | 5                  | 3.12E-01 | 5                  | 3.12E-01 | 1                  | 6.18E-01 | 1                  | 6.18E-01 |
| ZNF197    | 3   | 5                  | 1.74E-01 | 5                  | 1.74E-01 | 3                  | 8.39E-01 | 3                  | 8.39E-01 | 3                  | 3.12E-01 | 3                  | 3.12E-01 |
| ZNHIT3    | 17  | 1                  | 3.58E-02 | 1                  | 3.58E-02 | 1                  | 1.00E+00 | 1                  | 1.00E+00 | 1                  | 3.12E-01 | 1                  | 3.12E-01 |
| PLA2G4F   | 15  | 2                  | 5.68E-01 | 2                  | 5.68E-01 | 1                  | 3.12E-01 | 1                  | 3.12E-01 | 2                  | 5.01E-01 | 2                  | 5.01E-01 |
| HMGB4     | 1   | 3                  | 2.34E-02 | 3                  | 2.34E-02 | 1                  | 3.12E-01 | 1                  | 3.12E-01 | 3                  | 7.57E-01 | 3                  | 7.57E-01 |
| LPL       | 8   | 1                  | 7.42E-01 | 2                  | 2.35E-01 | 1                  | 4.81E-01 | 2                  | 6.78E-01 |                    |          | 1                  | 3.12E-01 |
| TSEN54    | 17  | 4                  | 5.84E-01 | 6                  | 4.22E-01 | 3                  | 1.00E+00 | 5                  | 3.12E-01 | 3                  | 1.00E+00 | 5                  | 5.92E-01 |
| ASIC3     | 7   | 2                  | 3.22E-01 | 2                  | 3.22E-01 | 2                  | 4.02E-01 | 2                  | 4.02E-01 | 2                  | 3.12E-01 | 2                  | 3.12E-01 |
| PKHD1L1   | 8   | 18                 | 4.10E-01 | 19                 | 4.10E-01 | 14                 | 8.56E-01 | 15                 | 8.56E-01 | 10                 | 3.12E-01 | 11                 | 3.12E-01 |
| SLC35G1   | 10  | 3                  | 1.17E-02 | 3                  | 1.17E-02 | 2                  | 6.00E-01 | 2                  | 6.00E-01 | 1                  | 3.12E-01 | 1                  | 3.12E-01 |
| BOC       | 3   | 8                  | 4.48E-01 | 8                  | 4.48E-01 | 5                  | 3.13E-01 | 5                  | 3.13E-01 | 3                  | 5.02E-01 | 3                  | 5.02E-01 |
| GSN       | 9   | 5                  | 1.00E+00 | 5                  | 1.00E+00 | 5                  | 3.13E-01 | 5                  | 3.13E-01 | 4                  | 5.19E-01 | 4                  | 5.19E-01 |
| CAPN10    | 2   | 6                  | 1.60E-01 | 6                  | 1.60E-01 | 4                  | 3.13E-01 | 4                  | 3.13E-01 | 4                  | 7.51E-01 | 4                  | 7.51E-01 |
| NFASC     | 1   | 2                  | 8.59E-01 | 2                  | 8.59E-01 | 2                  | 3.13E-01 | 2                  | 3.13E-01 | 1                  | 3.28E-01 | 1                  | 3.28E-01 |
| CAPN12    | 19  | 11                 | 3.54E-01 | 11                 | 3.54E-01 | 7                  | 3.13E-01 | 7                  | 3.13E-01 | 5                  | 4.68E-01 | 5                  | 4.68E-01 |
| FER1L6    | 8   | 18                 | 5.13E-01 | 19                 | 4.97E-01 | 12                 | 8.45E-01 | 13                 | 8.99E-01 | 12                 | 3.14E-01 | 13                 | 3.85E-01 |
| TF        | 3   | 3                  | 7.16E-02 | 4                  | 3.68E-01 | 1                  | 1.00E+00 | 2                  | 1.00E+00 | 3                  | 3.14E-01 | 4                  | 6.20E-01 |
| LSG1      | 3   | 5                  | 7.22E-01 | 5                  | 7.22E-01 | 5                  | 3.14E-01 | 5                  | 3.14E-01 | 4                  | 4.18E-01 | 4                  | 4.18E-01 |
| USP54     | 10  | 6                  | 6.43E-01 | 6                  | 6.43E-01 | 4                  | 3.14E-01 | 4                  | 3.14E-01 | 5                  | 8.16E-01 | 5                  | 8.16E-01 |
| QRFPR     | 4   | 1                  | 1.12E-01 | 1                  | 1.12E-01 | 1                  | 3.14E-01 | 1                  | 3.14E-01 |                    |          |                    |          |
| SAMD12    | 8   | 1                  | 6.77E-01 | 1                  | 6.77E-01 | 1                  | 3.14E-01 | 1                  | 3.14E-01 | 1                  | 4.39E-01 | 1                  | 4.39E-01 |
| ADGRV1    | 5   | 25                 | 2.81E-01 | 28                 | 2.64E-01 | 24                 | 3.97E-01 | 27                 | 3.97E-01 | 16                 | 3.46E-01 | 19                 | 3.14E-01 |
| C5        | 9   | 4                  | 4.88E-01 | 4                  | 4.88E-01 | 2                  | 4.02E-01 | 2                  | 4.02E-01 | 3                  | 3.15E-01 | 3                  | 3.15E-01 |
| POSTN     | 13  | 4                  | 7.69E-01 | 4                  | 7.69E-01 | 3                  | 3.15E-01 | 3                  | 3.15E-01 | 2                  | 3.47E-01 | 2                  | 3.47E-01 |
| ZCCHC4    | 4   | 4                  | 1.00E+00 | 4                  | 1.00E+00 | 4                  | 3.15E-01 | 4                  | 3.15E-01 | 2                  | 5.12E-01 | 2                  | 5.12E-01 |
| CENPJ     | 13  | 6                  | 1.10E-01 | 6                  | 1.10E-01 | 3                  | 6.34E-01 | 3                  | 6.34E-01 | 5                  | 3.15E-01 | 5                  | 3.15E-01 |
| CUZD1     | 10  | 2                  | 8.43E-01 | 2                  | 8.43E-01 | 2                  | 3.15E-01 | 2                  | 3.15E-01 | 1                  | 3.34E-01 | 1                  | 3.34E-01 |
| GABRA6    | 5   | 4                  | 3.33E-01 | 4                  | 3.33E-01 | 4                  | 4.06E-01 | 4                  | 4.06E-01 | 1                  | 3.15E-01 | 1                  | 3.15E-01 |
| SETD1A    | 16  | 7                  | 2.94E-01 | 7                  | 2.94E-01 | 6                  | 3.15E-01 | 6                  | 3.15E-01 | 2                  | 6.32E-01 | 2                  | 6.32E-01 |
| TPO       | 2   | 3                  | 2.34E-03 | 3                  | 2.34E-03 | 1                  | 4.97E-01 | 1                  | 4.97E-01 | 2                  | 3.15E-01 | 2                  | 3.15E-01 |
| IL1F10    | 2   | 1                  | 7.55E-01 | 1                  | 7.55E-01 | 1                  | 3.85E-01 | 1                  | 3.85E-01 | 1                  | 3.15E-01 | 1                  | 3.15E-01 |
| CHST4     | 16  | 4                  | 4.41E-01 | 4                  | 4.41E-01 | 4                  | 3.15E-01 | 4                  | 3.15E-01 | 1                  | 3.38E-01 | 1                  | 3.38E-01 |
| PDIA4     | 7   | 5                  | 3.92E-01 | 5                  | 3.92E-01 | 4                  | 3.88E-01 | 4                  | 3.88E-01 | 3                  | 3.15E-01 | 3                  | 3.15E-01 |
| AKAP9     | 7   | 10                 | 8.99E-01 | 10                 | 8.99E-01 | 9                  | 3.18E-01 | 9                  | 3.18E-01 | 6                  | 3.15E-01 | 6                  | 3.15E-01 |
| ESYT3     | 3   | 5                  | 8.47E-01 | 5                  | 8.47E-01 | 5                  | 3.81E-01 | 5                  | 3.81E-01 | 3                  | 3.16E-01 | 3                  | 3.16E-01 |
| SPACA4    | 19  | 1                  | 1.50E-01 | 1                  | 1.50E-01 | 1                  | 3.16E-01 | 1                  | 3.16E-01 |                    |          |                    |          |
| FCER2     | 19  |                    |          | 1                  | 1.28E-01 |                    |          | 1                  | 1.00E+00 |                    |          | 1                  | 3.16E-01 |
| C10orf54  | 10  | 2                  | 9.62E-02 | 2                  | 9.62E-02 | 2                  | 3.16E-01 | 2                  | 3.16E-01 | 1                  | 1.00E+00 | 1                  | 1.00E+00 |

| SetID    | Chr | ADEH- vs NA        |          |                    |          | ADEH+ vs ADEH-     |          |                    |          | ADEH+ vs NA        |          |                    |          |
|----------|-----|--------------------|----------|--------------------|----------|--------------------|----------|--------------------|----------|--------------------|----------|--------------------|----------|
|          |     | rarenovel          |          | all                |          | rarenovel          |          | all                |          | rarenovel          |          | all                |          |
|          |     | N variants in test | p-value  | N variants in test | p-value  | N variants in test | p-value  | N variants in test | p-value  | N variants in test | p-value  | N variants in test | p-value  |
| ITGA9    | 3   | 2                  | 2.22E-01 | 2                  | 2.22E-01 | 2                  | 4.26E-01 | 2                  | 4.26E-01 | 1                  | 3.16E-01 | 1                  | 3.16E-01 |
| NFAT5    | 16  | 4                  | 1.00E+00 | 4                  | 1.00E+00 | 3                  | 3.92E-01 | 3                  | 3.92E-01 | 2                  | 3.16E-01 | 2                  | 3.16E-01 |
| KRT72    | 12  | 7                  | 5.39E-01 | 7                  | 5.39E-01 | 5                  | 3.62E-01 | 5                  | 3.62E-01 | 5                  | 3.16E-01 | 5                  | 3.16E-01 |
| STOX2    | 4   | 6                  | 1.00E+00 | 6                  | 1.00E+00 | 5                  | 4.13E-01 | 5                  | 4.13E-01 | 3                  | 3.16E-01 | 3                  | 3.16E-01 |
| PLCL1    | 2   |                    |          | 1                  | 4.95E-01 |                    |          | 1                  | 4.98E-01 |                    |          | 1                  | 3.17E-01 |
| P2RX4    | 12  | 4                  | 7.67E-01 | 4                  | 7.67E-01 | 4                  | 3.17E-01 | 4                  | 3.17E-01 | 2                  | 3.66E-01 | 2                  | 3.66E-01 |
| PSPN     | 19  | 1                  | 6.88E-02 | 1                  | 6.88E-02 | 1                  | 4.84E-01 | 1                  | 4.84E-01 | 1                  | 3.17E-01 | 1                  | 3.17E-01 |
| TTC3     | 21  | 3                  | 3.30E-01 | 5                  | 7.15E-01 | 3                  | 8.11E-01 | 5                  | 4.65E-01 |                    |          | 2                  | 3.17E-01 |
| NEK1     | 4   | 6                  | 8.97E-01 | 6                  | 8.97E-01 | 6                  | 3.17E-01 | 6                  | 3.17E-01 | 2                  | 3.52E-01 | 2                  | 3.52E-01 |
| OR52H1   | 11  | 1                  | 8.06E-01 | 1                  | 8.06E-01 | 1                  | 3.17E-01 | 1                  | 3.17E-01 | 1                  | 4.25E-01 | 1                  | 4.25E-01 |
| PRR12    | 19  | 6                  | 8.50E-02 | 6                  | 8.50E-02 | 2                  | 5.66E-01 | 2                  | 5.66E-01 | 5                  | 3.17E-01 | 5                  | 3.17E-01 |
| TCF25    | 16  | 3                  | 1.00E+00 | 3                  | 1.00E+00 | 3                  | 4.21E-01 | 3                  | 4.21E-01 | 2                  | 3.17E-01 | 2                  | 3.17E-01 |
| PPIC     | 5   | 3                  | 5.54E-01 | 3                  | 5.54E-01 | 3                  | 3.17E-01 | 3                  | 3.17E-01 | 2                  | 4.70E-01 | 2                  | 4.70E-01 |
| MAPK15   | 8   | 7                  | 6.09E-01 | 7                  | 6.09E-01 | 7                  | 3.17E-01 | 7                  | 3.17E-01 | 2                  | 4.85E-01 | 2                  | 4.85E-01 |
| PCNT     | 21  | 8                  | 5.74E-01 | 9                  | 5.78E-01 | 7                  | 3.63E-01 | 8                  | 3.69E-01 | 5                  | 3.17E-01 | 6                  | 3.19E-01 |
| B3GNT9   | 16  | 2                  | 5.93E-01 | 2                  | 5.93E-01 | 2                  | 5.10E-01 | 2                  | 5.10E-01 | 1                  | 3.17E-01 | 1                  | 3.17E-01 |
| AP1M2    | 19  | 4                  | 1.05E-01 | 4                  | 1.05E-01 | 3                  | 5.56E-01 | 3                  | 5.56E-01 | 2                  | 3.17E-01 | 2                  | 3.17E-01 |
| THEMIS   | 6   | 5                  | 1.45E-02 | 5                  | 1.45E-02 | 1                  | 4.94E-01 | 1                  | 4.94E-01 | 4                  | 3.17E-01 | 4                  | 3.17E-01 |
| RLN3     | 19  | 2                  | 3.72E-01 | 2                  | 3.72E-01 | 2                  | 3.18E-01 | 2                  | 3.18E-01 | 1                  | 4.39E-01 | 1                  | 4.39E-01 |
| MFRP     | 11  | 8                  | 7.81E-01 | 8                  | 7.81E-01 | 6                  | 3.18E-01 | 6                  | 3.18E-01 | 3                  | 3.91E-01 | 3                  | 3.91E-01 |
| ABCC5    | 3   | 2                  | 8.08E-01 | 2                  | 8.08E-01 | 2                  | 5.07E-01 | 2                  | 5.07E-01 | 1                  | 3.18E-01 | 1                  | 3.18E-01 |
| PKLR     | 1   | 6                  | 5.54E-01 | 6                  | 5.54E-01 | 6                  | 3.18E-01 | 6                  | 3.18E-01 | 3                  | 4.31E-01 | 3                  | 4.31E-01 |
| TRIM2    | 4   | 1                  | 3.39E-01 | 1                  | 3.39E-01 | 1                  | 5.06E-01 | 1                  | 5.06E-01 | 1                  | 3.18E-01 | 1                  | 3.18E-01 |
| SH3BP5   | 3   | 1                  | 7.55E-01 | 1                  | 7.55E-01 | 1                  | 3.18E-01 | 1                  | 3.18E-01 | 1                  | 3.44E-01 | 1                  | 3.44E-01 |
| ATOH1    | 4   | 1                  | 3.13E-01 | 1                  | 3.13E-01 | 1                  | 5.36E-01 | 1                  | 5.36E-01 | 1                  | 3.18E-01 | 1                  | 3.18E-01 |
| PALM     | 19  | 2                  | 7.45E-02 | 2                  | 7.45E-02 | 2                  | 6.40E-01 | 2                  | 6.40E-01 | 1                  | 3.18E-01 | 1                  | 3.18E-01 |
| HEXA     | 15  | 1                  | 7.90E-03 | 1                  | 7.90E-03 |                    |          |                    |          | 1                  | 3.18E-01 | 1                  | 3.18E-01 |
| USP35    | 11  | 6                  | 1.20E-01 | 7                  | 1.07E-01 | 4                  | 5.39E-01 | 5                  | 9.03E-01 | 3                  | 3.18E-01 | 4                  | 3.31E-01 |
| CHMP4C   | 8   | 2                  | 4.32E-01 | 3                  | 8.02E-01 | 1                  | 5.07E-01 | 2                  | 3.18E-01 | 1                  | 6.33E-01 | 2                  | 4.01E-01 |
| TACR2    | 10  | 2                  | 7.05E-02 | 2                  | 7.05E-02 | 1                  | 3.96E-01 | 1                  | 3.96E-01 | 2                  | 3.18E-01 | 2                  | 3.18E-01 |
| GSTA5    | 6   | 2                  | 7.03E-01 | 2                  | 7.03E-01 | 2                  | 3.18E-01 | 2                  | 3.18E-01 | 1                  | 4.51E-01 | 1                  | 4.51E-01 |
| EPB41L5  | 2   | 4                  | 3.58E-01 | 4                  | 3.58E-01 | 2                  | 3.18E-01 | 2                  | 3.18E-01 | 3                  | 5.25E-01 | 3                  | 5.25E-01 |
| CAPN13   | 2   | 5                  | 7.81E-01 | 6                  | 7.75E-01 | 5                  | 3.18E-01 | 6                  | 5.04E-01 | 2                  | 3.48E-01 | 3                  | 7.15E-01 |
| IPPK     | 9   | 3                  | 2.47E-01 | 3                  | 2.47E-01 | 2                  | 3.18E-01 | 2                  | 3.18E-01 | 2                  | 4.15E-01 | 2                  | 4.15E-01 |
| DUSP12   | 1   | 2                  | 9.72E-02 | 2                  | 9.72E-02 | 2                  | 6.19E-01 | 2                  | 6.19E-01 | 1                  | 3.19E-01 | 1                  | 3.19E-01 |
| SSTR4    | 20  | 3                  | 7.78E-01 | 3                  | 7.78E-01 | 2                  | 4.01E-01 | 2                  | 4.01E-01 | 2                  | 3.19E-01 | 2                  | 3.19E-01 |
| FRMD4B   | 3   | 8                  | 1.16E-01 | 8                  | 1.16E-01 | 4                  | 3.19E-01 | 4                  | 3.19E-01 | 6                  | 1.00E+00 | 6                  | 1.00E+00 |
| OR6V1    | 7   | 2                  | 3.63E-01 | 3                  | 5.73E-01 | 1                  | 4.55E-01 | 2                  | 3.19E-01 | 1                  | 6.51E-01 | 2                  | 3.58E-01 |
| ZC3H6    | 2   | 1                  | 5.57E-01 | 1                  | 5.57E-01 | 1                  | 3.19E-01 | 1                  | 3.19E-01 | 1                  | 1.00E+00 | 1                  | 1.00E+00 |
| SPACA3   | 17  | 1                  | 2.92E-01 | 1                  | 2.92E-01 | 1                  | 3.19E-01 | 1                  | 3.19E-01 | 1                  | 1.00E+00 | 1                  | 1.00E+00 |
| LRRCS6   | 11  | 5                  | 6.29E-01 | 5                  | 6.29E-01 | 4                  | 3.19E-01 | 4                  | 3.19E-01 | 4                  | 3.78E-01 | 4                  | 3.78E-01 |
| COX10    | 17  | 2                  | 8.34E-01 | 2                  | 8.34E-01 | 1                  | 3.19E-01 | 1                  | 3.19E-01 | 2                  | 4.51E-01 | 2                  | 4.51E-01 |
| HLA-DQB2 | 6   | 2                  | 1.00E+00 | 2                  | 1.00E+00 | 2                  | 3.50E-01 | 2                  | 3.50E-01 | 1                  | 3.19E-01 | 1                  | 3.19E-01 |
| OGFR     | 20  | 3                  | 2.65E-01 | 3                  | 2.65E-01 | 3                  | 1.00E+00 | 3                  | 1.00E+00 | 2                  | 3.20E-01 | 2                  | 3.20E-01 |
| ZC3H14   | 14  | 1                  | 4.12E-01 | 1                  | 4.12E-01 | 1                  | 3.20E-01 | 1                  | 3.20E-01 | 1                  | 6.50E-01 | 1                  | 6.50E-01 |
| FPGT     | 1   | 2                  | 1.00E+00 | 2                  | 1.00E+00 | 2                  | 3.79E-01 | 2                  | 3.79E-01 | 1                  | 3.20E-01 | 1                  | 3.20E-01 |
| ZC3H12A  | 1   | 5                  | 4.75E-01 | 5                  | 4.75E-01 | 5                  | 3.27E-01 | 5                  | 3.27E-01 | 3                  | 3.20E-01 | 3                  | 3.20E-01 |
| RNF123   | 3   | 3                  | 7.65E-01 | 3                  | 7.65E-01 | 4                  | 3.20E-01 | 4                  | 3.20E-01 | 3                  | 4.52E-01 | 3                  | 4.52E-01 |

| SetID       | Chr | ADEH- vs NA        |          |                    |          | ADEH+ vs ADEH-     |          |                    |          | ADEH+ vs NA        |          |                    |          |
|-------------|-----|--------------------|----------|--------------------|----------|--------------------|----------|--------------------|----------|--------------------|----------|--------------------|----------|
|             |     | rarenovel          |          | all                |          | rarenovel          |          | all                |          | rarenovel          |          | all                |          |
|             |     | N variants in test | p-value  | N variants in test | p-value  | N variants in test | p-value  | N variants in test | p-value  | N variants in test | p-value  | N variants in test | p-value  |
| ACKR3       | 2   | 1                  | 6.28E-02 | 1                  | 6.28E-02 | 1                  | 4.74E-01 | 1                  | 4.74E-01 | 1                  | 3.20E-01 | 1                  | 3.20E-01 |
| RAPSN       | 11  | 2                  | 6.18E-01 | 3                  | 3.98E-01 | 2                  | 3.20E-01 | 3                  | 1.00E+00 | 1                  | 4.50E-01 | 2                  | 3.91E-01 |
| JMJD1C      | 10  | 9                  | 4.27E-01 | 9                  | 4.27E-01 | 8                  | 3.20E-01 | 8                  | 3.20E-01 | 3                  | 5.26E-01 | 3                  | 5.26E-01 |
| DNER        | 2   | 3                  | 1.13E-01 | 3                  | 1.13E-01 | 3                  | 7.47E-01 | 3                  | 7.47E-01 | 1                  | 3.20E-01 | 1                  | 3.20E-01 |
| UAP1        | 1   | 1                  | 3.04E-01 | 1                  | 3.04E-01 | 1                  | 3.20E-01 | 1                  | 3.20E-01 | 1                  | 6.64E-01 | 1                  | 6.64E-01 |
| RAE1        | 20  | 1                  | 6.57E-02 | 1                  | 6.57E-02 | 1                  | 5.01E-01 | 1                  | 5.01E-01 | 1                  | 3.20E-01 | 1                  | 3.20E-01 |
| ZNF77       | 19  | 6                  | 1.00E+00 | 6                  | 1.00E+00 | 6                  | 3.50E-01 | 6                  | 3.50E-01 | 2                  | 3.20E-01 | 2                  | 3.20E-01 |
| SPAG17      | 1   | 3                  | 2.96E-02 | 5                  | 3.14E-02 | 1                  | 4.25E-01 | 3                  | 4.48E-01 | 3                  | 3.20E-01 | 5                  | 3.26E-01 |
| WDR5B       | 3   | 2                  | 5.09E-01 | 2                  | 5.09E-01 | 2                  | 3.21E-01 | 2                  | 3.21E-01 | 1                  | 1.00E+00 | 1                  | 1.00E+00 |
| CNPPD1      | 2   | 2                  | 1.00E+00 | 2                  | 1.00E+00 | 2                  | 3.21E-01 | 2                  | 3.21E-01 | 2                  | 4.24E-01 | 2                  | 4.24E-01 |
| ZSWIM5      | 1   | 5                  | 7.27E-01 | 5                  | 7.27E-01 | 5                  | 3.65E-01 | 5                  | 3.65E-01 | 1                  | 3.21E-01 | 1                  | 3.21E-01 |
| XPNP3       | 22  | 4                  | 3.19E-02 | 4                  | 3.19E-02 | 2                  | 6.23E-01 | 2                  | 6.23E-01 | 3                  | 3.21E-01 | 3                  | 3.21E-01 |
| SLC30A5     | 5   | 2                  | 1.00E+00 | 2                  | 1.00E+00 | 2                  | 3.37E-01 | 2                  | 3.37E-01 | 1                  | 3.21E-01 | 1                  | 3.21E-01 |
| SAFB2       | 19  | 1                  | 6.03E-02 | 1                  | 6.03E-02 | 1                  | 6.86E-01 | 1                  | 6.86E-01 | 1                  | 3.21E-01 | 1                  | 3.21E-01 |
| JMJD8       | 16  | 3                  | 1.00E+00 | 3                  | 1.00E+00 | 3                  | 3.22E-01 | 3                  | 3.22E-01 | 2                  | 4.43E-01 | 2                  | 4.43E-01 |
| PLEKHO2     | 15  | 2                  | 1.87E-01 | 2                  | 1.87E-01 | 2                  | 1.00E+00 | 2                  | 1.00E+00 | 2                  | 3.22E-01 | 2                  | 3.22E-01 |
| PLA2G4B     | 15  | 9                  | 3.29E-01 | 9                  | 3.29E-01 | 6                  | 3.22E-01 | 6                  | 3.22E-01 | 4                  | 6.57E-01 | 4                  | 6.57E-01 |
| KIAA0319L   | 1   | 1                  | 5.01E-01 | 1                  | 5.01E-01 | 1                  | 1.00E+00 | 1                  | 1.00E+00 | 1                  | 3.22E-01 | 1                  | 3.22E-01 |
| DDX28       | 16  | 3                  | 1.20E-01 | 3                  | 1.20E-01 | 3                  | 6.93E-01 | 3                  | 6.93E-01 | 1                  | 3.22E-01 | 1                  | 3.22E-01 |
| SLC7A2      | 8   | 5                  | 7.28E-01 | 5                  | 7.28E-01 | 5                  | 3.22E-01 | 5                  | 3.22E-01 | 4                  | 3.50E-01 | 4                  | 3.50E-01 |
| PDCD7       | 15  | 2                  | 7.91E-01 | 2                  | 7.91E-01 | 2                  | 4.80E-01 | 2                  | 4.80E-01 | 1                  | 3.22E-01 | 1                  | 3.22E-01 |
| PAK7        | 20  | 3                  | 8.74E-01 | 3                  | 8.74E-01 | 3                  | 3.22E-01 | 3                  | 3.22E-01 | 1                  | 4.35E-01 | 1                  | 4.35E-01 |
| ITIH2       | 10  | 7                  | 2.98E-01 | 7                  | 2.98E-01 | 5                  | 1.00E+00 | 5                  | 1.00E+00 | 5                  | 3.22E-01 | 5                  | 3.22E-01 |
| PVRL3       | 3   | 2                  | 5.60E-02 | 2                  | 5.60E-02 | 2                  | 3.22E-01 | 2                  | 3.22E-01 |                    |          |                    |          |
| NOC3L       | 10  | 2                  | 7.75E-01 | 3                  | 8.23E-01 | 2                  | 3.86E-01 | 3                  | 4.13E-01 | 2                  | 3.22E-01 | 3                  | 3.43E-01 |
| CYP2C9      | 10  | 6                  | 3.74E-02 | 7                  | 3.84E-02 | 6                  | 3.64E-01 | 7                  | 3.79E-01 | 4                  | 3.22E-01 | 5                  | 3.25E-01 |
| NLRP14      | 11  | 2                  | 1.30E-01 | 2                  | 1.30E-01 | 2                  | 3.22E-01 | 2                  | 3.22E-01 | 1                  | 6.16E-01 | 1                  | 6.16E-01 |
| GCA         | 2   | 3                  | 5.61E-01 | 3                  | 5.61E-01 | 3                  | 3.70E-01 | 3                  | 3.70E-01 | 1                  | 3.22E-01 | 1                  | 3.22E-01 |
| CACNA1G     | 17  | 4                  | 4.36E-01 | 4                  | 4.36E-01 | 3                  | 4.01E-01 | 3                  | 4.01E-01 | 2                  | 3.23E-01 | 2                  | 3.23E-01 |
| KCNRG       | 13  | 2                  | 8.39E-02 | 2                  | 8.39E-02 | 2                  | 6.22E-01 | 2                  | 6.22E-01 | 1                  | 3.23E-01 | 1                  | 3.23E-01 |
| PHACTR4     | 1   | 6                  | 2.48E-01 | 6                  | 2.48E-01 | 4                  | 5.06E-01 | 4                  | 5.06E-01 | 3                  | 3.23E-01 | 3                  | 3.23E-01 |
| OR52E2      | 11  | 2                  | 3.71E-01 | 3                  | 3.71E-01 | 1                  | 3.91E-01 | 2                  | 3.91E-01 | 2                  | 3.23E-01 | 3                  | 3.23E-01 |
| DEPDC5      | 22  | 4                  | 3.28E-01 | 4                  | 3.28E-01 | 3                  | 5.41E-01 | 3                  | 5.41E-01 | 3                  | 3.23E-01 | 3                  | 3.23E-01 |
| TTC22       | 1   | 3                  | 7.40E-01 | 6                  | 7.72E-01 | 2                  | 6.08E-01 | 4                  | 3.23E-01 | 2                  | 6.46E-01 | 5                  | 4.83E-01 |
| ANKRD16     | 10  | 3                  | 1.27E-01 | 3                  | 1.27E-01 | 2                  | 3.23E-01 | 2                  | 3.23E-01 | 2                  | 1.00E+00 | 2                  | 1.00E+00 |
| PRRC2C      | 1   | 11                 | 1.23E-01 | 11                 | 1.23E-01 | 8                  | 3.23E-01 | 8                  | 3.23E-01 | 7                  | 6.31E-01 | 7                  | 6.31E-01 |
| OR2S2       | 9   | 4                  | 7.31E-01 | 4                  | 7.31E-01 | 4                  | 4.80E-01 | 4                  | 4.80E-01 | 1                  | 3.23E-01 | 1                  | 3.23E-01 |
| AKAP2       | 9   | 3                  | 1.00E+00 | 3                  | 1.00E+00 | 3                  | 4.43E-01 | 3                  | 4.43E-01 | 2                  | 3.23E-01 | 2                  | 3.23E-01 |
| PALM2-AKAP2 | 9   | 3                  | 1.00E+00 | 3                  | 1.00E+00 | 3                  | 4.43E-01 | 3                  | 4.43E-01 | 2                  | 3.23E-01 | 2                  | 3.23E-01 |
| AATK        | 17  | 7                  | 7.72E-01 | 7                  | 7.72E-01 | 6                  | 3.23E-01 | 6                  | 3.23E-01 | 3                  | 3.69E-01 | 3                  | 3.69E-01 |
| SPHKAP      | 2   | 6                  | 7.69E-01 | 7                  | 7.69E-01 | 5                  | 3.24E-01 | 6                  | 3.24E-01 | 3                  | 3.35E-01 | 4                  | 3.35E-01 |
| TMEM218     | 11  | 2                  | 8.13E-01 | 2                  | 8.13E-01 | 2                  | 3.24E-01 | 2                  | 3.24E-01 | 2                  | 3.45E-01 | 2                  | 3.45E-01 |
| LRRN4       | 20  | 3                  | 2.14E-01 | 5                  | 2.74E-01 | 3                  | 3.24E-01 | 5                  | 3.34E-01 | 1                  | 6.50E-01 | 3                  | 6.82E-01 |
| PLIN3       | 19  | 3                  | 5.32E-01 | 3                  | 5.32E-01 | 1                  | 3.24E-01 | 1                  | 3.24E-01 | 3                  | 3.58E-01 | 3                  | 3.58E-01 |
| FUK         | 16  | 13                 | 1.00E+00 | 13                 | 1.00E+00 | 10                 | 3.24E-01 | 10                 | 3.24E-01 | 8                  | 3.34E-01 | 8                  | 3.34E-01 |
| TBX2        | 17  | 4                  | 4.27E-01 | 4                  | 4.27E-01 | 3                  | 3.24E-01 | 3                  | 3.24E-01 | 2                  | 6.26E-01 | 2                  | 6.26E-01 |
| AVIL        | 12  | 4                  | 1.00E+00 | 4                  | 1.00E+00 | 3                  | 3.24E-01 | 3                  | 3.24E-01 | 3                  | 4.27E-01 | 3                  | 4.27E-01 |
| TKFC        | 11  | 3                  | 6.92E-01 | 3                  | 6.92E-01 | 3                  | 3.33E-01 | 3                  | 3.33E-01 | 1                  | 3.24E-01 | 1                  | 3.24E-01 |

| SetID    | Chr | ADEH- vs NA        |          |                    |          | ADEH+ vs ADEH-     |          |                    |          | ADEH+ vs NA        |          |                    |          |
|----------|-----|--------------------|----------|--------------------|----------|--------------------|----------|--------------------|----------|--------------------|----------|--------------------|----------|
|          |     | rarenovel          |          | all                |          | rarenovel          |          | all                |          | rarenovel          |          | all                |          |
|          |     | N variants in test | p-value  | N variants in test | p-value  | N variants in test | p-value  | N variants in test | p-value  | N variants in test | p-value  | N variants in test | p-value  |
| HKR1     | 19  | 3                  | 4.08E-01 | 3                  | 4.08E-01 | 3                  | 1.00E+00 | 3                  | 1.00E+00 | 1                  | 3.24E-01 | 1                  | 3.24E-01 |
| MAP7D1   | 1   | 3                  | 6.14E-01 | 3                  | 6.14E-01 | 3                  | 3.24E-01 | 3                  | 3.24E-01 | 1                  | 4.55E-01 | 1                  | 4.55E-01 |
| PRAME    | 22  | 2                  | 6.86E-01 | 2                  | 6.86E-01 | 2                  | 3.24E-01 | 2                  | 3.24E-01 | 1                  | 3.39E-01 | 1                  | 3.39E-01 |
| SLCO1C1  | 12  | 3                  | 4.88E-01 | 3                  | 4.88E-01 | 2                  | 3.63E-01 | 2                  | 3.63E-01 | 2                  | 3.25E-01 | 2                  | 3.25E-01 |
| HECTD4   | 12  | 2                  | 7.92E-01 | 2                  | 7.92E-01 | 2                  | 4.28E-01 | 2                  | 4.28E-01 | 1                  | 3.25E-01 | 1                  | 3.25E-01 |
| CCDC89   | 11  | 2                  | 5.44E-01 | 2                  | 5.44E-01 | 1                  | 3.25E-01 | 1                  | 3.25E-01 | 2                  | 3.87E-01 | 2                  | 3.87E-01 |
| HDAC5    | 17  | 3                  | 2.64E-01 | 3                  | 2.64E-01 | 3                  | 5.64E-01 | 3                  | 5.64E-01 | 1                  | 3.25E-01 | 1                  | 3.25E-01 |
| ENDOG    | 9   | 1                  | 6.74E-01 | 1                  | 6.74E-01 | 1                  | 1.00E+00 | 1                  | 1.00E+00 | 1                  | 3.25E-01 | 1                  | 3.25E-01 |
| CSMD1    | 8   | 8                  | 4.54E-01 | 8                  | 4.54E-01 | 4                  | 3.25E-01 | 4                  | 3.25E-01 | 6                  | 6.04E-01 | 6                  | 6.04E-01 |
| RRH      | 4   | 2                  | 6.87E-03 | 2                  | 6.87E-03 | 1                  | 4.74E-01 | 1                  | 4.74E-01 | 1                  | 3.26E-01 | 1                  | 3.26E-01 |
| PPA2     | 4   | 3                  | 1.26E-02 | 3                  | 1.26E-02 | 2                  | 6.45E-01 | 2                  | 6.45E-01 | 1                  | 3.26E-01 | 1                  | 3.26E-01 |
| TDRD6    | 6   | 15                 | 1.99E-01 | 15                 | 1.99E-01 | 13                 | 8.76E-01 | 13                 | 8.76E-01 | 7                  | 3.26E-01 | 7                  | 3.26E-01 |
| FMO4     | 1   | 7                  | 5.18E-01 | 7                  | 5.18E-01 | 7                  | 3.54E-01 | 7                  | 3.54E-01 | 1                  | 3.26E-01 | 1                  | 3.26E-01 |
| CEBPZ    | 2   | 6                  | 1.05E-01 | 6                  | 1.05E-01 | 4                  | 6.29E-01 | 4                  | 6.29E-01 | 3                  | 3.26E-01 | 3                  | 3.26E-01 |
| ADAM19   | 5   | 4                  | 2.01E-01 | 4                  | 2.01E-01 | 3                  | 5.52E-01 | 3                  | 5.52E-01 | 3                  | 3.26E-01 | 3                  | 3.26E-01 |
| TIE1     | 1   | 6                  | 6.77E-01 | 6                  | 6.77E-01 | 5                  | 3.26E-01 | 5                  | 3.26E-01 | 4                  | 4.86E-01 | 4                  | 4.86E-01 |
| GAS8     | 16  | 7                  | 3.96E-01 | 7                  | 3.96E-01 | 5                  | 3.27E-01 | 5                  | 3.27E-01 | 5                  | 3.72E-01 | 5                  | 3.72E-01 |
| ELF2     | 4   | 1                  | 8.54E-01 | 1                  | 8.54E-01 | 1                  | 3.27E-01 | 1                  | 3.27E-01 | 1                  | 3.57E-01 | 1                  | 3.57E-01 |
| CFAP99   | 4   | 2                  | 5.05E-01 | 2                  | 5.05E-01 | 2                  | 3.27E-01 | 2                  | 3.27E-01 | 1                  | 4.50E-01 | 1                  | 4.50E-01 |
| SCML4    | 6   | 3                  | 7.39E-01 | 3                  | 7.39E-01 | 3                  | 3.27E-01 | 3                  | 3.27E-01 | 1                  | 3.90E-01 | 1                  | 3.90E-01 |
| IL15RA   | 10  | 1                  | 5.97E-02 | 1                  | 5.97E-02 | 1                  | 4.67E-01 | 1                  | 4.67E-01 | 1                  | 3.27E-01 | 1                  | 3.27E-01 |
| MYH14    | 19  | 7                  | 4.36E-01 | 7                  | 4.36E-01 | 3                  | 4.20E-01 | 3                  | 4.20E-01 | 5                  | 3.27E-01 | 5                  | 3.27E-01 |
| FCN1     | 9   | 4                  | 8.87E-02 | 4                  | 8.87E-02 | 3                  | 3.27E-01 | 3                  | 3.27E-01 | 1                  | 6.18E-01 | 1                  | 6.18E-01 |
| KIF15    | 3   | 4                  | 1.30E-01 | 4                  | 1.30E-01 | 3                  | 3.27E-01 | 3                  | 3.27E-01 | 4                  | 6.27E-01 | 4                  | 6.27E-01 |
| OR52M1   | 11  | 4                  | 9.61E-02 | 4                  | 9.61E-02 | 3                  | 8.08E-01 | 3                  | 8.08E-01 | 3                  | 3.27E-01 | 3                  | 3.27E-01 |
| GAL3ST4  | 7   | 4                  | 3.69E-01 | 4                  | 3.69E-01 | 4                  | 4.29E-01 | 4                  | 4.29E-01 | 1                  | 3.27E-01 | 1                  | 3.27E-01 |
| MEI1     | 22  | 5                  | 8.84E-01 | 5                  | 8.84E-01 | 5                  | 3.53E-01 | 5                  | 3.53E-01 | 3                  | 3.27E-01 | 3                  | 3.27E-01 |
| DTHD1    | 4   | 6                  | 2.22E-01 | 6                  | 2.22E-01 | 3                  | 8.28E-01 | 3                  | 8.28E-01 | 5                  | 3.27E-01 | 5                  | 3.27E-01 |
| CADPS2   | 7   | 6                  | 1.39E-01 | 6                  | 1.39E-01 | 6                  | 3.27E-01 | 6                  | 3.27E-01 | 1                  | 6.12E-01 | 1                  | 6.12E-01 |
| CDHR3    | 7   | 6                  | 1.47E-01 | 7                  | 1.47E-01 | 6                  | 4.40E-01 | 7                  | 4.32E-01 | 1                  | 3.27E-01 | 2                  | 3.38E-01 |
| OR4D1    | 17  | 6                  | 5.00E-01 | 6                  | 5.00E-01 | 6                  | 7.17E-01 | 6                  | 7.17E-01 | 1                  | 3.27E-01 | 1                  | 3.27E-01 |
| ADAT1    | 16  | 5                  | 7.95E-01 | 5                  | 7.95E-01 | 5                  | 5.67E-01 | 5                  | 5.67E-01 | 1                  | 3.28E-01 | 1                  | 3.28E-01 |
| SPATA20  | 17  | 5                  | 1.00E+00 | 5                  | 1.00E+00 | 4                  | 3.28E-01 | 4                  | 3.28E-01 | 2                  | 3.70E-01 | 2                  | 3.70E-01 |
| NRBP2    | 8   | 2                  | 1.09E-02 | 2                  | 1.09E-02 | 1                  | 4.67E-01 | 1                  | 4.67E-01 | 1                  | 3.28E-01 | 1                  | 3.28E-01 |
| SCN2A    | 2   | 1                  | 4.34E-01 | 1                  | 4.34E-01 | 1                  | 3.28E-01 | 1                  | 3.28E-01 | 1                  | 6.04E-01 | 1                  | 6.04E-01 |
| SPEN     | 1   | 12                 | 1.49E-01 | 12                 | 1.49E-01 | 8                  | 3.28E-01 | 8                  | 3.28E-01 | 4                  | 3.80E-01 | 4                  | 3.80E-01 |
| SON      | 21  | 5                  | 4.14E-01 | 5                  | 4.14E-01 | 3                  | 3.51E-01 | 3                  | 3.51E-01 | 4                  | 3.28E-01 | 4                  | 3.28E-01 |
| ANK3     | 10  | 16                 | 6.03E-01 | 16                 | 6.03E-01 | 14                 | 3.28E-01 | 14                 | 3.28E-01 | 12                 | 4.27E-01 | 12                 | 4.27E-01 |
| TCTEX1D2 | 3   | 1                  | 4.52E-02 | 1                  | 4.52E-02 | 1                  | 5.50E-01 | 1                  | 5.50E-01 | 1                  | 3.28E-01 | 1                  | 3.28E-01 |
| OR6Y1    | 1   | 4                  | 4.60E-01 | 5                  | 4.61E-01 | 3                  | 3.50E-01 | 4                  | 3.50E-01 | 3                  | 3.28E-01 | 4                  | 3.28E-01 |
| MBLAC1   | 7   | 1                  | 7.53E-01 | 2                  | 4.54E-01 | 1                  | 5.66E-01 | 2                  | 1.00E+00 |                    |          | 1                  | 3.28E-01 |
| CPVL     | 7   | 2                  | 4.09E-01 | 2                  | 4.09E-01 | 2                  | 1.00E+00 | 2                  | 1.00E+00 | 1                  | 3.28E-01 | 1                  | 3.28E-01 |
| ACP7     | 19  | 4                  | 3.50E-01 | 4                  | 3.50E-01 | 4                  | 3.28E-01 | 4                  | 3.28E-01 | 3                  | 3.33E-01 | 3                  | 3.33E-01 |
| BMP2K    | 4   | 4                  | 6.90E-01 | 4                  | 6.90E-01 | 4                  | 3.28E-01 | 4                  | 3.28E-01 | 1                  | 3.30E-01 | 1                  | 3.30E-01 |
| DUOX2    | 15  | 10                 | 4.80E-02 | 10                 | 4.80E-02 | 10                 | 3.29E-01 | 10                 | 3.29E-01 | 2                  | 7.30E-01 | 2                  | 7.30E-01 |
| LTK      | 15  | 5                  | 1.00E+00 | 6                  | 1.00E+00 | 5                  | 3.29E-01 | 6                  | 8.31E-01 | 4                  | 4.17E-01 | 5                  | 1.00E+00 |
| TBC1D7   | 6   | 3                  | 1.75E-01 | 3                  | 1.75E-01 | 1                  | 3.93E-01 | 1                  | 3.93E-01 | 3                  | 3.29E-01 | 3                  | 3.29E-01 |
| TPGS1    | 19  | 2                  | 3.26E-01 | 2                  | 3.26E-01 | 2                  | 3.29E-01 | 2                  | 3.29E-01 | 2                  | 4.70E-01 | 2                  | 4.70E-01 |

| SetID    | Chr | ADEH- vs NA        |          |                    |          | ADEH+ vs ADEH-     |          |                    |          | ADEH+ vs NA        |          |                    |          |
|----------|-----|--------------------|----------|--------------------|----------|--------------------|----------|--------------------|----------|--------------------|----------|--------------------|----------|
|          |     | rarenovel          |          | all                |          | rarenovel          |          | all                |          | rarenovel          |          | all                |          |
|          |     | N variants in test | p-value  | N variants in test | p-value  | N variants in test | p-value  | N variants in test | p-value  | N variants in test | p-value  | N variants in test | p-value  |
| ALOX12   | 17  | 2                  | 2.45E-01 | 2                  | 2.45E-01 | 2                  | 7.49E-01 | 2                  | 7.49E-01 | 1                  | 3.29E-01 | 1                  | 3.29E-01 |
| RNF214   | 11  | 2                  | 6.99E-02 | 2                  | 6.99E-02 | 2                  | 3.29E-01 | 2                  | 3.29E-01 |                    |          |                    |          |
| IL5RA    | 3   | 2                  | 5.72E-01 | 2                  | 5.72E-01 | 2                  | 5.20E-01 | 2                  | 5.20E-01 | 1                  | 3.29E-01 | 1                  | 3.29E-01 |
| PUM3     | 9   | 8                  | 2.87E-01 | 8                  | 2.87E-01 | 5                  | 3.86E-01 | 5                  | 3.86E-01 | 5                  | 3.29E-01 | 5                  | 3.29E-01 |
| TRIM32   | 9   | 1                  | 6.56E-02 | 1                  | 6.56E-02 | 1                  | 5.48E-01 | 1                  | 5.48E-01 | 1                  | 3.29E-01 | 1                  | 3.29E-01 |
| SMPD1    | 11  | 7                  | 4.37E-01 | 7                  | 4.37E-01 | 6                  | 8.50E-01 | 6                  | 8.50E-01 | 2                  | 3.29E-01 | 2                  | 3.29E-01 |
| AADAC    | 3   | 1                  | 5.48E-01 | 1                  | 5.48E-01 | 1                  | 4.05E-01 | 1                  | 4.05E-01 | 1                  | 3.29E-01 | 1                  | 3.29E-01 |
| TMEM240  | 1   | 1                  | 1.25E-01 | 1                  | 1.25E-01 | 1                  | 3.29E-01 | 1                  | 3.29E-01 |                    |          |                    |          |
| KIAA1755 | 20  | 1                  | 1.00E+00 | 1                  | 1.00E+00 | 2                  | 3.29E-01 | 2                  | 3.29E-01 | 2                  | 4.43E-01 | 2                  | 4.43E-01 |
| NKTR     | 3   | 6                  | 8.05E-01 | 6                  | 8.05E-01 | 5                  | 3.30E-01 | 5                  | 3.30E-01 | 3                  | 6.66E-01 | 3                  | 6.66E-01 |
| SLC1A6   | 19  | 2                  | 5.57E-01 | 2                  | 5.57E-01 | 2                  | 5.05E-01 | 2                  | 5.05E-01 | 1                  | 3.30E-01 | 1                  | 3.30E-01 |
| SAPCD1   | 6   | 3                  | 8.61E-01 | 3                  | 8.61E-01 | 3                  | 3.30E-01 | 3                  | 3.30E-01 | 2                  | 3.37E-01 | 2                  | 3.37E-01 |
| KIF20A   | 5   | 5                  | 8.59E-01 | 5                  | 8.59E-01 | 5                  | 3.30E-01 | 5                  | 3.30E-01 | 4                  | 3.56E-01 | 4                  | 3.56E-01 |
| LONP1    | 19  | 5                  | 8.58E-01 | 5                  | 8.58E-01 | 4                  | 3.30E-01 | 4                  | 3.30E-01 | 4                  | 4.08E-01 | 4                  | 4.08E-01 |
| THEMIS2  | 1   | 2                  | 6.54E-01 | 2                  | 6.54E-01 | 2                  | 3.30E-01 | 2                  | 3.30E-01 | 1                  | 5.57E-01 | 1                  | 5.57E-01 |
| CD44     | 11  | 1                  | 6.85E-02 | 1                  | 6.85E-02 | 1                  | 5.13E-01 | 1                  | 5.13E-01 | 1                  | 3.30E-01 | 1                  | 3.30E-01 |
| RESP18   | 2   | 4                  | 8.64E-01 | 4                  | 8.64E-01 | 3                  | 3.30E-01 | 3                  | 3.30E-01 | 3                  | 4.99E-01 | 3                  | 4.99E-01 |
| C1RL     | 12  | 2                  | 8.67E-03 | 2                  | 8.67E-03 | 1                  | 4.90E-01 | 1                  | 4.90E-01 | 1                  | 3.30E-01 | 1                  | 3.30E-01 |
| SNTG1    | 8   | 2                  | 8.31E-01 | 2                  | 8.31E-01 | 2                  | 4.02E-01 | 2                  | 4.02E-01 | 1                  | 3.30E-01 | 1                  | 3.30E-01 |
| MYOT     | 5   | 3                  | 6.58E-03 | 3                  | 6.58E-03 | 1                  | 4.94E-01 | 1                  | 4.94E-01 | 3                  | 3.30E-01 | 3                  | 3.30E-01 |
| ALDH1L1  | 3   | 8                  | 7.46E-01 | 8                  | 7.46E-01 | 6                  | 4.96E-01 | 6                  | 4.96E-01 | 3                  | 3.30E-01 | 3                  | 3.30E-01 |
| PRLH     | 2   | 1                  | 7.30E-03 | 1                  | 7.30E-03 |                    |          |                    |          | 1                  | 3.30E-01 | 1                  | 3.30E-01 |
| POU2F1   | 1   | 3                  | 4.67E-01 | 3                  | 4.67E-01 | 3                  | 3.30E-01 | 3                  | 3.30E-01 | 1                  | 4.61E-01 | 1                  | 4.61E-01 |
| RHOBTB2  | 8   | 3                  | 5.70E-01 | 3                  | 5.70E-01 | 3                  | 4.81E-01 | 3                  | 4.81E-01 | 1                  | 3.30E-01 | 1                  | 3.30E-01 |
| DGAT2    | 11  | 2                  | 2.91E-01 | 2                  | 2.91E-01 | 2                  | 3.30E-01 | 2                  | 3.30E-01 | 1                  | 6.18E-01 | 1                  | 6.18E-01 |
| COG1     | 17  | 6                  | 8.73E-01 | 6                  | 8.73E-01 | 5                  | 4.12E-01 | 5                  | 4.12E-01 | 4                  | 3.30E-01 | 4                  | 3.30E-01 |
| SLFN13   | 17  |                    |          | 1                  | 4.36E-01 |                    |          | 1                  | 4.90E-01 |                    |          | 1                  | 3.30E-01 |
| ECT2L    | 6   | 7                  | 3.57E-01 | 7                  | 3.57E-01 | 7                  | 3.31E-01 | 7                  | 3.31E-01 | 2                  | 6.34E-01 | 2                  | 6.34E-01 |
| DPP9     | 19  | 3                  | 5.94E-01 | 3                  | 5.94E-01 | 3                  | 4.94E-01 | 3                  | 4.94E-01 | 1                  | 3.31E-01 | 1                  | 3.31E-01 |
| SLC35A1  | 6   | 1                  | 7.96E-01 | 1                  | 7.96E-01 | 1                  | 1.00E+00 | 1                  | 1.00E+00 | 1                  | 3.31E-01 | 1                  | 3.31E-01 |
| VASN     | 16  | 1                  | 7.58E-01 | 1                  | 7.58E-01 | 1                  | 3.31E-01 | 1                  | 3.31E-01 | 1                  | 3.32E-01 | 1                  | 3.32E-01 |
| PEX11G   | 19  | 4                  | 3.86E-01 | 4                  | 3.86E-01 | 2                  | 3.31E-01 | 2                  | 3.31E-01 | 3                  | 5.89E-01 | 3                  | 5.89E-01 |
| ITGB2    | 21  | 4                  | 1.76E-01 | 4                  | 1.76E-01 | 3                  | 5.56E-01 | 3                  | 5.56E-01 | 3                  | 3.31E-01 | 3                  | 3.31E-01 |
| PROCR    | 20  | 1                  | 1.21E-01 | 1                  | 1.21E-01 | 1                  | 3.31E-01 | 1                  | 3.31E-01 |                    |          |                    |          |
| DPEP2    | 16  | 1                  | 4.36E-01 | 1                  | 4.36E-01 | 1                  | 3.31E-01 | 1                  | 3.31E-01 | 1                  | 5.99E-01 | 1                  | 5.99E-01 |
| MPDU1    | 17  | 1                  | 5.84E-03 | 1                  | 5.84E-03 |                    |          |                    |          | 1                  | 3.31E-01 | 1                  | 3.31E-01 |
| SLMAP    | 3   | 2                  | 4.50E-01 | 2                  | 4.50E-01 | 1                  | 3.32E-01 | 1                  | 3.32E-01 | 2                  | 6.28E-01 | 2                  | 6.28E-01 |
| CDH8     | 16  | 2                  | 7.85E-02 | 2                  | 7.85E-02 | 2                  | 6.05E-01 | 2                  | 6.05E-01 | 1                  | 3.32E-01 | 1                  | 3.32E-01 |
| ZNF860   | 3   | 4                  | 4.10E-01 | 4                  | 4.10E-01 | 3                  | 3.32E-01 | 3                  | 3.32E-01 | 3                  | 1.00E+00 | 3                  | 1.00E+00 |
| BPTF     | 17  | 8                  | 4.91E-01 | 8                  | 4.91E-01 | 5                  | 3.32E-01 | 5                  | 3.32E-01 | 5                  | 5.28E-01 | 5                  | 5.28E-01 |
| ADAMTS12 | 5   | 7                  | 4.40E-01 | 7                  | 4.40E-01 | 6                  | 3.32E-01 | 6                  | 3.32E-01 | 2                  | 6.43E-01 | 2                  | 6.43E-01 |
| CEP104   | 1   | 3                  | 6.82E-01 | 3                  | 6.82E-01 | 3                  | 3.32E-01 | 3                  | 3.32E-01 | 1                  | 4.50E-01 | 1                  | 4.50E-01 |
| LYVE1    | 11  | 1                  | 4.30E-01 | 1                  | 4.30E-01 | 1                  | 3.32E-01 | 1                  | 3.32E-01 | 1                  | 6.20E-01 | 1                  | 6.20E-01 |
| OR5H1    | 3   | 1                  | 7.07E-01 | 2                  | 7.56E-01 | 1                  | 1.00E+00 | 2                  | 3.32E-01 | 1                  | 6.98E-01 | 2                  | 6.90E-01 |
| BST1     | 4   | 3                  | 8.74E-01 | 3                  | 8.74E-01 | 3                  | 3.32E-01 | 3                  | 3.32E-01 | 1                  | 3.38E-01 | 1                  | 3.38E-01 |
| MACF1    | 1   | 14                 | 4.46E-01 | 14                 | 4.46E-01 | 13                 | 3.48E-01 | 13                 | 3.48E-01 | 9                  | 3.33E-01 | 9                  | 3.33E-01 |
| C2CD3    | 11  | 10                 | 4.19E-01 | 10                 | 4.19E-01 | 10                 | 3.33E-01 | 10                 | 3.33E-01 | 5                  | 3.42E-01 | 5                  | 3.42E-01 |
| DEFB132  | 20  | 2                  | 2.84E-01 | 2                  | 2.84E-01 | 2                  | 3.33E-01 | 2                  | 3.33E-01 | 2                  | 4.84E-01 | 2                  | 4.84E-01 |

| SetID     | Chr | ADEH- vs NA        |          |                    |          | ADEH+ vs ADEH-     |          |                    |          | ADEH+ vs NA        |          |                    |          |
|-----------|-----|--------------------|----------|--------------------|----------|--------------------|----------|--------------------|----------|--------------------|----------|--------------------|----------|
|           |     | rarenovel          |          | all                |          | rarenovel          |          | all                |          | rarenovel          |          | all                |          |
|           |     | N variants in test | p-value  | N variants in test | p-value  | N variants in test | p-value  | N variants in test | p-value  | N variants in test | p-value  | N variants in test | p-value  |
| STK36     | 2   | 7                  | 4.80E-01 | 7                  | 4.80E-01 | 6                  | 3.33E-01 | 6                  | 3.33E-01 | 3                  | 7.28E-01 | 3                  | 7.28E-01 |
| MEP1B     | 18  | 5                  | 9.39E-02 | 5                  | 9.39E-02 | 3                  | 1.00E+00 | 3                  | 1.00E+00 | 4                  | 3.33E-01 | 4                  | 3.33E-01 |
| ZNRF3     | 22  | 2                  | 5.01E-01 | 2                  | 5.01E-01 | 2                  | 3.33E-01 | 2                  | 3.33E-01 | 2                  | 1.00E+00 | 2                  | 1.00E+00 |
| ACTL7B    | 9   | 3                  | 7.21E-02 | 3                  | 7.21E-02 | 2                  | 3.34E-01 | 2                  | 3.34E-01 | 1                  | 6.60E-01 | 1                  | 6.60E-01 |
| DDX60     | 4   | 2                  | 8.88E-03 | 2                  | 8.88E-03 | 1                  | 4.75E-01 | 1                  | 4.75E-01 | 1                  | 3.34E-01 | 1                  | 3.34E-01 |
| GSDMB     | 17  | 3                  | 1.37E-01 | 3                  | 1.37E-01 | 3                  | 7.66E-01 | 3                  | 7.66E-01 | 1                  | 3.34E-01 | 1                  | 3.34E-01 |
| SLC26A11  | 17  | 5                  | 7.13E-01 | 5                  | 7.13E-01 | 4                  | 4.94E-01 | 4                  | 4.94E-01 | 3                  | 3.34E-01 | 3                  | 3.34E-01 |
| TMPRSS11B | 4   | 5                  | 2.17E-01 | 5                  | 2.17E-01 | 5                  | 3.34E-01 | 5                  | 3.34E-01 | 2                  | 4.85E-01 | 2                  | 4.85E-01 |
| SOWAHA    | 5   | 2                  | 5.80E-02 | 2                  | 5.80E-02 | 2                  | 3.34E-01 | 2                  | 3.34E-01 |                    |          |                    |          |
| FSCB      | 14  | 3                  | 1.14E-01 | 3                  | 1.14E-01 | 2                  | 3.34E-01 | 2                  | 3.34E-01 | 1                  | 6.64E-01 | 1                  | 6.64E-01 |
| CYR61     | 1   | 1                  | 5.97E-01 | 1                  | 5.97E-01 | 1                  | 4.02E-01 | 1                  | 4.02E-01 | 1                  | 3.34E-01 | 1                  | 3.34E-01 |
| GALC      | 14  | 3                  | 6.95E-01 | 4                  | 1.78E-01 | 2                  | 6.10E-01 | 3                  | 8.97E-01 | 1                  | 6.06E-01 | 2                  | 3.34E-01 |
| ARHGAP22  | 10  | 5                  | 9.39E-02 | 5                  | 9.39E-02 | 2                  | 6.18E-01 | 2                  | 6.18E-01 | 4                  | 3.34E-01 | 4                  | 3.34E-01 |
| NXPE2     | 11  | 6                  | 3.24E-01 | 6                  | 3.24E-01 | 3                  | 3.34E-01 | 3                  | 3.34E-01 | 5                  | 8.41E-01 | 5                  | 8.41E-01 |
| PEAK1     | 15  | 10                 | 5.23E-01 | 10                 | 5.23E-01 | 6                  | 4.87E-01 | 6                  | 4.87E-01 | 5                  | 3.35E-01 | 5                  | 3.35E-01 |
| NID1      | 1   | 6                  | 8.58E-01 | 6                  | 8.58E-01 | 6                  | 3.35E-01 | 6                  | 3.35E-01 | 2                  | 3.72E-01 | 2                  | 3.72E-01 |
| TIMM44    | 19  | 2                  | 2.54E-01 | 2                  | 2.54E-01 | 1                  | 3.35E-01 | 1                  | 3.35E-01 | 2                  | 1.00E+00 | 2                  | 1.00E+00 |
| GON4L     | 1   | 4                  | 5.94E-01 | 4                  | 5.94E-01 | 4                  | 4.74E-01 | 4                  | 4.74E-01 | 1                  | 3.35E-01 | 1                  | 3.35E-01 |
| SHANK1    | 19  | 5                  | 5.72E-01 | 5                  | 5.72E-01 | 2                  | 3.61E-01 | 2                  | 3.61E-01 | 4                  | 3.35E-01 | 4                  | 3.35E-01 |
| MLXIPL    | 7   | 2                  | 1.00E+00 | 2                  | 1.00E+00 | 2                  | 3.96E-01 | 2                  | 3.96E-01 | 1                  | 3.35E-01 | 1                  | 3.35E-01 |
| HSPA4     | 5   | 2                  | 1.00E+00 | 2                  | 1.00E+00 | 2                  | 3.35E-01 | 2                  | 3.35E-01 | 1                  | 3.72E-01 | 1                  | 3.72E-01 |
| TMEM243   | 7   | 2                  | 3.08E-01 | 2                  | 3.08E-01 | 2                  | 3.36E-01 | 2                  | 3.36E-01 | 1                  | 6.07E-01 | 1                  | 6.07E-01 |
| GLTSCR1   | 19  | 1                  | 8.57E-01 | 1                  | 8.57E-01 | 1                  | 3.36E-01 | 1                  | 3.36E-01 | 1                  | 4.54E-01 | 1                  | 4.54E-01 |
| DSTYK     | 1   | 5                  | 3.53E-01 | 5                  | 3.53E-01 | 3                  | 3.36E-01 | 3                  | 3.36E-01 | 4                  | 6.37E-01 | 4                  | 6.37E-01 |
| OR8D4     | 11  |                    |          | 1                  | 8.25E-01 |                    |          | 1                  | 3.60E-01 |                    |          | 1                  | 3.36E-01 |
| ZBTB39    | 12  | 4                  | 4.61E-01 | 4                  | 4.61E-01 | 4                  | 3.36E-01 | 4                  | 3.36E-01 | 2                  | 1.00E+00 | 2                  | 1.00E+00 |
| LRP1      | 12  | 9                  | 2.49E-01 | 9                  | 2.49E-01 | 5                  | 3.36E-01 | 5                  | 3.36E-01 | 5                  | 3.57E-01 | 5                  | 3.57E-01 |
| MYOC      | 1   | 1                  | 2.38E-01 | 2                  | 2.03E-01 | 1                  | 4.50E-01 | 2                  | 3.36E-01 |                    |          | 1                  | 4.88E-01 |
| WWC1      | 5   | 3                  | 1.04E-01 | 3                  | 1.04E-01 | 3                  | 6.27E-01 | 3                  | 6.27E-01 | 1                  | 3.36E-01 | 1                  | 3.36E-01 |
| CCDC73    | 11  | 3                  | 2.37E-01 | 3                  | 2.37E-01 | 3                  | 1.00E+00 | 3                  | 1.00E+00 | 1                  | 3.36E-01 | 1                  | 3.36E-01 |
| PLAT      | 8   | 4                  | 1.85E-01 | 4                  | 1.85E-01 | 2                  | 5.62E-01 | 2                  | 5.62E-01 | 4                  | 3.36E-01 | 4                  | 3.36E-01 |
| HYDIN     | 16  | 4                  | 6.68E-01 | 4                  | 6.68E-01 | 3                  | 3.36E-01 | 3                  | 3.36E-01 | 2                  | 6.77E-01 | 2                  | 6.77E-01 |
| NDUFAF7   | 2   | 3                  | 6.69E-02 | 3                  | 6.69E-02 | 3                  | 3.36E-01 | 3                  | 3.36E-01 |                    |          |                    |          |
| PTPN23    | 3   | 3                  | 1.85E-01 | 3                  | 1.85E-01 | 3                  | 3.36E-01 | 3                  | 3.36E-01 | 1                  | 5.93E-01 | 1                  | 5.93E-01 |
| GJA9      | 1   | 1                  | 1.22E-01 | 1                  | 1.22E-01 | 1                  | 3.36E-01 | 1                  | 3.36E-01 |                    |          |                    |          |
| CELSR1    | 22  | 10                 | 1.00E+00 | 10                 | 1.00E+00 | 8                  | 3.36E-01 | 8                  | 3.36E-01 | 7                  | 3.87E-01 | 7                  | 3.87E-01 |
| GCC1      | 7   | 3                  | 9.04E-02 | 3                  | 9.04E-02 | 3                  | 7.67E-01 | 3                  | 7.67E-01 | 1                  | 3.36E-01 | 1                  | 3.36E-01 |
| GCNT4     | 5   | 1                  | 6.24E-01 | 1                  | 6.24E-01 | 1                  | 3.95E-01 | 1                  | 3.95E-01 | 1                  | 3.36E-01 | 1                  | 3.36E-01 |
| ACBD3     | 1   | 1                  | 4.08E-01 | 1                  | 4.08E-01 | 1                  | 3.36E-01 | 1                  | 3.36E-01 | 1                  | 5.80E-01 | 1                  | 5.80E-01 |
| FKBP6     | 7   | 1                  | 3.61E-01 | 1                  | 3.61E-01 | 1                  | 4.70E-01 | 1                  | 4.70E-01 | 1                  | 3.37E-01 | 1                  | 3.37E-01 |
| TESPA1    | 12  | 4                  | 8.20E-01 | 5                  | 1.45E-02 | 3                  | 6.56E-01 | 4                  | 6.69E-01 | 1                  | 5.80E-01 | 2                  | 3.37E-01 |
| NDUFS2    | 1   | 4                  | 7.83E-01 | 5                  | 7.71E-01 | 3                  | 6.77E-01 | 4                  | 3.53E-01 | 1                  | 6.60E-01 | 2                  | 3.37E-01 |
| TECPR2    | 14  | 2                  | 3.87E-01 | 2                  | 3.87E-01 | 2                  | 1.00E+00 | 2                  | 1.00E+00 | 1                  | 3.37E-01 | 1                  | 3.37E-01 |
| COL6A2    | 21  | 8                  | 4.30E-01 | 8                  | 4.30E-01 | 8                  | 5.09E-01 | 8                  | 5.09E-01 | 3                  | 3.37E-01 | 3                  | 3.37E-01 |
| MELK      | 9   | 3                  | 3.10E-02 | 3                  | 3.10E-02 | 3                  | 3.37E-01 | 3                  | 3.37E-01 | 1                  | 1.00E+00 | 1                  | 1.00E+00 |
| CTSZ      | 20  | 2                  | 1.00E+00 | 2                  | 1.00E+00 | 2                  | 4.10E-01 | 2                  | 4.10E-01 | 1                  | 3.37E-01 | 1                  | 3.37E-01 |
| IQUB      | 7   | 5                  | 4.21E-01 | 5                  | 4.21E-01 | 4                  | 5.58E-01 | 4                  | 5.58E-01 | 5                  | 3.37E-01 | 5                  | 3.37E-01 |
| SCN3A     | 2   | 4                  | 2.82E-01 | 4                  | 2.82E-01 | 4                  | 3.37E-01 | 4                  | 3.37E-01 | 3                  | 3.76E-01 | 3                  | 3.76E-01 |

| SetID    | Chr | ADEH- vs NA        |          |                    |          | ADEH+ vs ADEH-     |          |                    |          | ADEH+ vs NA        |          |                    |          |
|----------|-----|--------------------|----------|--------------------|----------|--------------------|----------|--------------------|----------|--------------------|----------|--------------------|----------|
|          |     | rarenovel          |          | all                |          | rarenovel          |          | all                |          | rarenovel          |          | all                |          |
|          |     | N variants in test | p-value  | N variants in test | p-value  | N variants in test | p-value  | N variants in test | p-value  | N variants in test | p-value  | N variants in test | p-value  |
| SDSL     | 12  | 4                  | 4.05E-01 | 4                  | 4.05E-01 | 3                  | 3.38E-01 | 3                  | 3.38E-01 | 4                  | 1.00E+00 | 4                  | 1.00E+00 |
| SYCP2    | 20  | 2                  | 9.93E-03 | 2                  | 9.93E-03 | 1                  | 5.11E-01 | 1                  | 5.11E-01 | 1                  | 3.38E-01 | 1                  | 3.38E-01 |
| PDE6B    | 4   | 6                  | 3.17E-01 | 6                  | 3.17E-01 | 3                  | 7.72E-01 | 3                  | 7.72E-01 | 4                  | 3.38E-01 | 4                  | 3.38E-01 |
| WNT9A    | 1   | 2                  | 1.05E-01 | 2                  | 1.05E-01 | 2                  | 6.33E-01 | 2                  | 6.33E-01 | 1                  | 3.38E-01 | 1                  | 3.38E-01 |
| 1-Mar    | 1   | 2                  | 7.97E-01 | 2                  | 7.97E-01 | 2                  | 3.38E-01 | 2                  | 3.38E-01 | 2                  | 1.00E+00 | 2                  | 1.00E+00 |
| HMMR     | 5   | 3                  | 4.06E-01 | 4                  | 4.15E-01 | 2                  | 1.00E+00 | 3                  | 1.00E+00 | 3                  | 3.38E-01 | 4                  | 3.48E-01 |
| CDC20B   | 5   | 3                  | 8.40E-01 | 3                  | 8.40E-01 | 2                  | 3.38E-01 | 2                  | 3.38E-01 | 2                  | 3.56E-01 | 2                  | 3.56E-01 |
| PIGN     | 18  | 3                  | 8.27E-01 | 3                  | 8.27E-01 | 3                  | 3.38E-01 | 3                  | 3.38E-01 | 2                  | 3.38E-01 | 2                  | 3.38E-01 |
| ISX      | 22  | 1                  | 7.48E-01 | 2                  | 8.34E-01 | 1                  | 5.01E-01 | 2                  | 4.99E-01 |                    |          | 1                  | 3.38E-01 |
| LNx1     | 4   | 4                  | 4.04E-01 | 4                  | 4.04E-01 | 3                  | 3.39E-01 | 3                  | 3.39E-01 | 2                  | 6.31E-01 | 2                  | 6.31E-01 |
| CBR4     | 4   | 3                  | 3.98E-01 | 3                  | 3.98E-01 | 2                  | 3.39E-01 | 2                  | 3.39E-01 | 2                  | 6.49E-01 | 2                  | 6.49E-01 |
| OR51D1   | 11  | 3                  | 3.58E-01 | 4                  | 3.29E-01 | 2                  | 1.00E+00 | 3                  | 1.00E+00 | 2                  | 3.39E-01 | 3                  | 5.14E-01 |
| PACSIN3  | 11  | 3                  | 6.30E-01 | 3                  | 6.30E-01 | 3                  | 3.39E-01 | 3                  | 3.39E-01 | 2                  | 7.54E-01 | 2                  | 7.54E-01 |
| MAP1A    | 15  | 11                 | 6.00E-01 | 11                 | 6.00E-01 | 9                  | 3.39E-01 | 9                  | 3.39E-01 | 7                  | 6.52E-01 | 7                  | 6.52E-01 |
| KIAA0100 | 17  | 9                  | 3.55E-01 | 9                  | 3.55E-01 | 6                  | 3.66E-01 | 6                  | 3.66E-01 | 4                  | 3.39E-01 | 4                  | 3.39E-01 |
| ZNF442   | 19  | 6                  | 5.78E-01 | 6                  | 5.78E-01 | 3                  | 3.39E-01 | 3                  | 3.39E-01 | 4                  | 3.97E-01 | 4                  | 3.97E-01 |
| DFNB31   | 9   | 11                 | 5.14E-01 | 11                 | 5.14E-01 | 8                  | 3.39E-01 | 8                  | 3.39E-01 | 4                  | 5.72E-01 | 4                  | 5.72E-01 |
| DNAH2    | 17  | 19                 | 8.91E-01 | 19                 | 8.91E-01 | 16                 | 3.39E-01 | 16                 | 3.39E-01 | 13                 | 3.78E-01 | 13                 | 3.78E-01 |
| CACNA1C  | 12  | 8                  | 5.27E-01 | 8                  | 5.27E-01 | 7                  | 4.12E-01 | 7                  | 4.12E-01 | 3                  | 3.39E-01 | 3                  | 3.39E-01 |
| SCN4A    | 17  | 10                 | 1.36E-01 | 10                 | 1.36E-01 | 5                  | 5.26E-01 | 5                  | 5.26E-01 | 6                  | 3.39E-01 | 6                  | 3.39E-01 |
| GSTA3    | 6   | 5                  | 2.11E-01 | 5                  | 2.11E-01 | 5                  | 3.39E-01 | 5                  | 3.39E-01 | 3                  | 1.00E+00 | 3                  | 1.00E+00 |
| LRIT2    | 10  | 3                  | 1.96E-01 | 3                  | 1.96E-01 | 3                  | 3.39E-01 | 3                  | 3.39E-01 | 2                  | 1.00E+00 | 2                  | 1.00E+00 |
| SNAPC3   | 9   | 2                  | 1.00E+00 | 2                  | 1.00E+00 | 2                  | 5.11E-01 | 2                  | 5.11E-01 | 1                  | 3.39E-01 | 1                  | 3.39E-01 |
| TDO2     | 4   | 4                  | 1.96E-01 | 4                  | 1.96E-01 | 2                  | 3.39E-01 | 2                  | 3.39E-01 | 3                  | 1.00E+00 | 3                  | 1.00E+00 |
| COL4A2   | 13  | 8                  | 2.07E-01 | 8                  | 2.07E-01 | 5                  | 3.40E-01 | 5                  | 3.40E-01 | 6                  | 6.97E-01 | 6                  | 6.97E-01 |
| EPHX1    | 1   | 2                  | 2.46E-01 | 3                  | 2.46E-01 | 1                  | 3.40E-01 | 2                  | 3.40E-01 | 1                  | 6.41E-01 | 2                  | 6.42E-01 |
| CYP26B1  | 2   | 4                  | 5.22E-01 | 4                  | 5.22E-01 | 3                  | 3.40E-01 | 3                  | 3.40E-01 | 2                  | 6.45E-01 | 2                  | 6.45E-01 |
| ANKRD53  | 2   | 3                  | 8.25E-01 | 3                  | 8.25E-01 | 3                  | 3.40E-01 | 3                  | 3.40E-01 | 1                  | 3.91E-01 | 1                  | 3.91E-01 |
| OR4D10   | 11  | 2                  | 7.27E-01 | 2                  | 7.27E-01 | 2                  | 3.40E-01 | 2                  | 3.40E-01 | 1                  | 1.00E+00 | 1                  | 1.00E+00 |
| BTN3A3   | 6   | 4                  | 2.63E-01 | 4                  | 2.63E-01 | 4                  | 1.00E+00 | 4                  | 1.00E+00 | 2                  | 3.40E-01 | 2                  | 3.40E-01 |
| KRT83    | 12  | 2                  | 4.63E-02 | 2                  | 4.63E-02 | 2                  | 1.00E+00 | 2                  | 1.00E+00 | 1                  | 3.41E-01 | 1                  | 3.41E-01 |
| AUTS2    | 7   | 3                  | 7.76E-01 | 3                  | 7.76E-01 | 3                  | 3.70E-01 | 3                  | 3.70E-01 | 1                  | 3.41E-01 | 1                  | 3.41E-01 |
| CD52     | 1   | 1                  | 4.23E-01 | 1                  | 4.23E-01 | 1                  | 1.00E+00 | 1                  | 1.00E+00 | 1                  | 3.41E-01 | 1                  | 3.41E-01 |
| BAIAP3   | 16  | 6                  | 1.68E-01 | 6                  | 1.68E-01 | 4                  | 3.41E-01 | 4                  | 3.41E-01 | 4                  | 1.00E+00 | 4                  | 1.00E+00 |
| MAN2B1   | 19  | 4                  | 6.04E-02 | 4                  | 6.04E-02 | 4                  | 3.41E-01 | 4                  | 3.41E-01 |                    |          |                    |          |
| MYH13    | 17  | 11                 | 7.22E-01 | 11                 | 7.22E-01 | 12                 | 3.41E-01 | 12                 | 3.41E-01 | 10                 | 4.86E-01 | 10                 | 4.86E-01 |
| IMPG2    | 3   | 3                  | 3.19E-01 | 3                  | 3.19E-01 | 3                  | 5.88E-01 | 3                  | 5.88E-01 | 1                  | 3.41E-01 | 1                  | 3.41E-01 |
| KEL      | 7   | 4                  | 8.15E-02 | 4                  | 8.15E-02 | 4                  | 1.00E+00 | 4                  | 1.00E+00 | 2                  | 3.41E-01 | 2                  | 3.41E-01 |
| TMEM232  | 5   | 1                  | 5.95E-01 | 1                  | 5.95E-01 | 1                  | 4.77E-01 | 1                  | 4.77E-01 | 1                  | 3.41E-01 | 1                  | 3.41E-01 |
| SPRYD4   | 12  | 1                  | 3.97E-01 | 1                  | 3.97E-01 | 1                  | 3.41E-01 | 1                  | 3.41E-01 | 1                  | 6.28E-01 | 1                  | 6.28E-01 |
| PLCB2    | 15  | 10                 | 3.14E-01 | 10                 | 3.14E-01 | 7                  | 3.42E-01 | 7                  | 3.42E-01 | 3                  | 5.27E-01 | 3                  | 5.27E-01 |
| GALK2    | 15  | 1                  | 1.13E-01 | 1                  | 1.13E-01 | 1                  | 3.42E-01 | 1                  | 3.42E-01 |                    |          |                    |          |
| HIVEP3   | 1   | 6                  | 2.61E-01 | 6                  | 2.61E-01 | 4                  | 1.00E+00 | 4                  | 1.00E+00 | 3                  | 3.42E-01 | 3                  | 3.42E-01 |
| ZNF837   | 19  | 3                  | 1.80E-01 | 3                  | 1.80E-01 | 3                  | 1.00E+00 | 3                  | 1.00E+00 | 1                  | 3.42E-01 | 1                  | 3.42E-01 |
| C5orf51  | 5   | 2                  | 2.80E-01 | 2                  | 2.80E-01 | 2                  | 7.08E-01 | 2                  | 7.08E-01 | 2                  | 3.42E-01 | 2                  | 3.42E-01 |
| OR5AR1   | 11  | 1                  | 7.44E-01 | 2                  | 7.47E-01 | 1                  | 4.66E-01 | 2                  | 4.67E-01 |                    |          | 1                  | 3.42E-01 |
| CAPZA3   | 12  | 4                  | 5.26E-01 | 4                  | 5.26E-01 | 4                  | 3.42E-01 | 4                  | 3.42E-01 | 4                  | 5.10E-01 | 4                  | 5.10E-01 |
| PRR15L   | 17  | 1                  | 6.21E-01 | 1                  | 6.21E-01 | 1                  | 3.42E-01 | 1                  | 3.42E-01 | 1                  | 1.00E+00 | 1                  | 1.00E+00 |



| SetID     | Chr | ADEH- vs NA        |          |                    |          | ADEH+ vs ADEH-     |          |                    |          | ADEH+ vs NA        |          |                    |          |
|-----------|-----|--------------------|----------|--------------------|----------|--------------------|----------|--------------------|----------|--------------------|----------|--------------------|----------|
|           |     | rarenovel          |          | all                |          | rarenovel          |          | all                |          | rarenovel          |          | all                |          |
|           |     | N variants in test | p-value  | N variants in test | p-value  | N variants in test | p-value  | N variants in test | p-value  | N variants in test | p-value  | N variants in test | p-value  |
| MYH2      | 17  | 7                  | 1.42E-01 | 7                  | 1.42E-01 | 7                  | 3.42E-01 | 7                  | 3.42E-01 | 1                  | 6.18E-01 | 1                  | 6.18E-01 |
| AMPD1     | 1   | 7                  | 3.93E-01 | 9                  | 4.00E-01 | 6                  | 4.85E-01 | 8                  | 5.22E-01 | 4                  | 3.42E-01 | 6                  | 3.99E-01 |
| GSDMC     | 8   | 5                  | 4.59E-01 | 6                  | 4.59E-01 | 5                  | 8.09E-01 | 6                  | 8.09E-01 | 1                  | 3.42E-01 | 2                  | 3.42E-01 |
| EML2      | 19  | 7                  | 6.46E-01 | 7                  | 6.46E-01 | 4                  | 3.43E-01 | 4                  | 3.43E-01 | 6                  | 5.00E-01 | 6                  | 5.00E-01 |
| C1orf112  | 1   | 1                  | 7.57E-01 | 2                  | 4.03E-01 | 1                  | 5.21E-01 | 2                  | 4.26E-01 |                    |          | 1                  | 3.43E-01 |
| HOXC12    | 12  | 1                  | 7.83E-01 | 1                  | 7.83E-01 | 1                  | 3.43E-01 | 1                  | 3.43E-01 | 1                  | 4.34E-01 | 1                  | 4.34E-01 |
| CEP135    | 4   | 7                  | 6.38E-01 | 7                  | 6.38E-01 | 5                  | 3.43E-01 | 5                  | 3.43E-01 | 5                  | 6.85E-01 | 5                  | 6.85E-01 |
| ZCCHC8    | 12  | 1                  | 1.96E-01 | 1                  | 1.96E-01 | 1                  | 4.45E-01 | 1                  | 4.45E-01 | 1                  | 3.43E-01 | 1                  | 3.43E-01 |
| NSMAF     | 8   | 3                  | 7.63E-01 | 3                  | 7.63E-01 | 2                  | 3.43E-01 | 2                  | 3.43E-01 | 2                  | 4.89E-01 | 2                  | 4.89E-01 |
| SYT6      | 1   | 2                  | 1.00E+00 | 2                  | 1.00E+00 | 2                  | 3.62E-01 | 2                  | 3.62E-01 | 1                  | 3.43E-01 | 1                  | 3.43E-01 |
| KCNA3     | 1   | 1                  | 5.89E-01 | 1                  | 5.89E-01 | 1                  | 3.44E-01 | 1                  | 3.44E-01 | 1                  | 6.49E-01 | 1                  | 6.49E-01 |
| GPATCH2   | 1   | 3                  | 4.66E-01 | 3                  | 4.66E-01 | 3                  | 8.18E-01 | 3                  | 8.18E-01 | 2                  | 3.44E-01 | 2                  | 3.44E-01 |
| CCBE1     | 18  | 5                  | 5.49E-01 | 5                  | 5.49E-01 | 4                  | 3.44E-01 | 4                  | 3.44E-01 | 2                  | 6.40E-01 | 2                  | 6.40E-01 |
| ARFGEF1   | 8   | 2                  | 5.29E-01 | 2                  | 5.29E-01 | 2                  | 3.44E-01 | 2                  | 3.44E-01 | 1                  | 1.00E+00 | 1                  | 1.00E+00 |
| ATP8B4    | 15  | 5                  | 6.26E-01 | 5                  | 6.26E-01 | 4                  | 3.44E-01 | 4                  | 3.44E-01 | 4                  | 7.54E-01 | 4                  | 7.54E-01 |
| ZC3H18    | 16  | 5                  | 8.57E-01 | 5                  | 8.57E-01 | 5                  | 3.60E-01 | 5                  | 3.60E-01 | 3                  | 3.44E-01 | 3                  | 3.44E-01 |
| OR2AG2    | 11  | 4                  | 1.06E-01 | 4                  | 1.06E-01 | 3                  | 5.17E-01 | 3                  | 5.17E-01 | 2                  | 3.44E-01 | 2                  | 3.44E-01 |
| CEP55     | 10  | 3                  | 3.36E-01 | 3                  | 3.36E-01 | 3                  | 3.44E-01 | 3                  | 3.44E-01 | 2                  | 8.34E-01 | 2                  | 8.34E-01 |
| TOM1      | 22  | 3                  | 2.02E-01 | 3                  | 2.02E-01 | 2                  | 7.41E-01 | 2                  | 7.41E-01 | 2                  | 3.44E-01 | 2                  | 3.44E-01 |
| DCDC2B    | 1   | 3                  | 4.30E-01 | 3                  | 4.30E-01 | 3                  | 3.44E-01 | 3                  | 3.44E-01 | 3                  | 7.27E-01 | 3                  | 7.27E-01 |
| LRRC40    | 1   | 4                  | 7.48E-01 | 4                  | 7.48E-01 | 4                  | 5.86E-01 | 4                  | 5.86E-01 | 2                  | 3.44E-01 | 2                  | 3.44E-01 |
| CEP350    | 1   | 14                 | 3.48E-01 | 14                 | 3.48E-01 | 12                 | 3.44E-01 | 12                 | 3.44E-01 | 8                  | 7.12E-01 | 8                  | 7.12E-01 |
| EMC10     | 19  | 4                  | 1.00E+00 | 4                  | 1.00E+00 | 4                  | 3.45E-01 | 4                  | 3.45E-01 | 1                  | 3.46E-01 | 1                  | 3.46E-01 |
| OR5V1     | 6   | 4                  | 4.27E-01 | 5                  | 4.29E-01 | 4                  | 4.94E-01 | 5                  | 8.83E-01 | 1                  | 3.45E-01 | 2                  | 3.54E-01 |
| SALL2     | 14  |                    |          | 1                  | 7.06E-01 |                    |          | 1                  | 4.83E-01 |                    |          | 1                  | 3.45E-01 |
| TNFSF18   | 1   | 2                  | 5.15E-01 | 2                  | 5.15E-01 | 1                  | 3.45E-01 | 1                  | 3.45E-01 | 2                  | 3.65E-01 | 2                  | 3.65E-01 |
| CCDC64B   | 16  | 3                  | 5.34E-01 | 4                  | 5.33E-01 | 2                  | 3.45E-01 | 3                  | 3.45E-01 | 2                  | 1.00E+00 | 3                  | 1.00E+00 |
| SETD5     | 3   | 6                  | 2.50E-02 | 6                  | 2.50E-02 | 5                  | 5.88E-01 | 5                  | 5.88E-01 | 1                  | 3.45E-01 | 1                  | 3.45E-01 |
| ASB15     | 7   | 6                  | 7.00E-01 | 6                  | 7.00E-01 | 5                  | 3.46E-01 | 5                  | 3.46E-01 | 2                  | 6.04E-01 | 2                  | 6.04E-01 |
| TLE3      | 15  | 1                  | 1.05E-01 | 1                  | 1.05E-01 | 1                  | 3.46E-01 | 1                  | 3.46E-01 |                    |          |                    |          |
| TTC36     | 11  | 1                  | 4.43E-01 | 1                  | 4.43E-01 | 1                  | 1.00E+00 | 1                  | 1.00E+00 | 1                  | 3.46E-01 | 1                  | 3.46E-01 |
| AADA4L4   | 1   | 3                  | 5.68E-01 | 3                  | 5.68E-01 | 2                  | 3.46E-01 | 2                  | 3.46E-01 | 2                  | 1.00E+00 | 2                  | 1.00E+00 |
| TAF6      | 7   | 3                  | 6.94E-04 | 3                  | 6.94E-04 | 2                  | 6.81E-01 | 2                  | 6.81E-01 | 4                  | 3.46E-01 | 4                  | 3.46E-01 |
| PTCH1     | 9   | 8                  | 1.34E-01 | 8                  | 1.34E-01 | 8                  | 3.46E-01 | 8                  | 3.46E-01 | 1                  | 6.47E-01 | 1                  | 6.47E-01 |
| ANXA7     | 10  | 5                  | 1.00E+00 | 5                  | 1.00E+00 | 4                  | 3.57E-01 | 4                  | 3.57E-01 | 2                  | 3.47E-01 | 2                  | 3.47E-01 |
| ZNF708    | 19  | 5                  | 6.13E-01 | 5                  | 6.13E-01 | 3                  | 3.47E-01 | 3                  | 3.47E-01 | 3                  | 3.83E-01 | 3                  | 3.83E-01 |
| PPP1R21   | 2   | 5                  | 7.56E-01 | 5                  | 7.56E-01 | 4                  | 4.25E-01 | 4                  | 4.25E-01 | 2                  | 3.47E-01 | 2                  | 3.47E-01 |
| NBEAL2    | 3   | 11                 | 3.10E-01 | 12                 | 2.90E-01 | 6                  | 4.15E-01 | 7                  | 4.10E-01 | 7                  | 3.55E-01 | 8                  | 3.47E-01 |
| SPTA1     | 1   | 13                 | 8.40E-01 | 13                 | 8.40E-01 | 11                 | 3.79E-01 | 11                 | 3.79E-01 | 7                  | 3.47E-01 | 7                  | 3.47E-01 |
| C10orf128 | 10  | 1                  | 1.03E-01 | 1                  | 1.03E-01 | 1                  | 3.47E-01 | 1                  | 3.47E-01 |                    |          |                    |          |
| GPR142    | 17  | 4                  | 7.69E-01 | 4                  | 7.69E-01 | 3                  | 3.47E-01 | 3                  | 3.47E-01 | 3                  | 5.21E-01 | 3                  | 5.21E-01 |
| GEN1      | 2   | 2                  | 1.90E-01 | 2                  | 1.90E-01 | 2                  | 3.48E-01 | 2                  | 3.48E-01 | 1                  | 6.05E-01 | 1                  | 6.05E-01 |
| PIGU      | 20  | 1                  | 4.52E-01 | 1                  | 4.52E-01 | 1                  | 3.48E-01 | 1                  | 3.48E-01 | 1                  | 1.00E+00 | 1                  | 1.00E+00 |
| DPYD      | 1   | 5                  | 6.45E-01 | 6                  | 6.66E-01 | 3                  | 3.48E-01 | 4                  | 4.58E-01 | 4                  | 3.70E-01 | 5                  | 4.86E-01 |
| MATN2     | 8   | 3                  | 6.95E-02 | 4                  | 6.28E-02 | 3                  | 3.59E-01 | 4                  | 3.48E-01 |                    |          | 1                  | 8.62E-01 |
| KIF6      | 6   | 5                  | 7.14E-01 | 5                  | 7.14E-01 | 5                  | 6.29E-01 | 5                  | 6.29E-01 | 2                  | 3.48E-01 | 2                  | 3.48E-01 |
| MC2R      | 18  | 3                  | 5.48E-01 | 3                  | 5.48E-01 | 2                  | 3.48E-01 | 2                  | 3.48E-01 | 2                  | 6.34E-01 | 2                  | 6.34E-01 |
| WDR34     | 9   | 2                  | 2.54E-01 | 2                  | 2.54E-01 | 1                  | 1.00E+00 | 1                  | 1.00E+00 | 2                  | 3.48E-01 | 2                  | 3.48E-01 |

| SetID     | Chr | ADEH- vs NA        |          |                    |          | ADEH+ vs ADEH-     |          |                    |          | ADEH+ vs NA        |          |                    |          |
|-----------|-----|--------------------|----------|--------------------|----------|--------------------|----------|--------------------|----------|--------------------|----------|--------------------|----------|
|           |     | rarenovel          |          | all                |          | rarenovel          |          | all                |          | rarenovel          |          | all                |          |
|           |     | N variants in test | p-value  | N variants in test | p-value  | N variants in test | p-value  | N variants in test | p-value  | N variants in test | p-value  | N variants in test | p-value  |
| C5orf22   | 5   | 2                  | 1.00E+00 | 2                  | 1.00E+00 | 2                  | 3.48E-01 | 2                  | 3.48E-01 | 2                  | 3.58E-01 | 2                  | 3.58E-01 |
| CC2D1A    | 19  | 7                  | 2.26E-01 | 7                  | 2.26E-01 | 5                  | 5.53E-01 | 5                  | 5.53E-01 | 3                  | 3.49E-01 | 3                  | 3.49E-01 |
| BBX       | 3   | 4                  | 6.59E-01 | 4                  | 6.59E-01 | 4                  | 3.49E-01 | 4                  | 3.49E-01 | 1                  | 4.55E-01 | 1                  | 4.55E-01 |
| BEST2     | 19  | 1                  | 7.64E-01 | 1                  | 7.64E-01 | 1                  | 1.00E+00 | 1                  | 1.00E+00 | 1                  | 3.49E-01 | 1                  | 3.49E-01 |
| PCDHA2    | 5   | 5                  | 6.86E-01 | 5                  | 6.86E-01 | 4                  | 3.49E-01 | 4                  | 3.49E-01 | 4                  | 3.84E-01 | 4                  | 3.84E-01 |
| DMWD      | 19  | 1                  | 5.63E-03 | 1                  | 5.63E-03 | 1                  | 1.00E+00 | 1                  | 1.00E+00 | 1                  | 3.49E-01 | 1                  | 3.49E-01 |
| OR52A1    | 11  | 2                  | 1.49E-01 | 2                  | 1.49E-01 | 2                  | 3.49E-01 | 2                  | 3.49E-01 | 1                  | 1.00E+00 | 1                  | 1.00E+00 |
| ROR2      | 9   | 4                  | 1.00E+00 | 4                  | 1.00E+00 | 3                  | 3.49E-01 | 3                  | 3.49E-01 | 2                  | 3.71E-01 | 2                  | 3.71E-01 |
| H6PD      | 1   | 5                  | 2.33E-01 | 5                  | 2.33E-01 | 4                  | 3.49E-01 | 4                  | 3.49E-01 | 1                  | 6.32E-01 | 1                  | 6.32E-01 |
| XXYLT1    | 3   | 1                  | 4.36E-01 | 1                  | 4.36E-01 | 1                  | 3.50E-01 | 1                  | 3.50E-01 | 1                  | 6.51E-01 | 1                  | 6.51E-01 |
| KIF1B     | 1   | 4                  | 3.42E-01 | 4                  | 3.42E-01 | 3                  | 5.28E-01 | 3                  | 5.28E-01 | 2                  | 3.50E-01 | 2                  | 3.50E-01 |
| ABHD10    | 3   | 1                  | 4.29E-01 | 1                  | 4.29E-01 | 1                  | 3.50E-01 | 1                  | 3.50E-01 | 1                  | 6.31E-01 | 1                  | 6.31E-01 |
| PCDHGB1   | 5   | 4                  | 3.27E-01 | 4                  | 3.27E-01 | 2                  | 7.37E-01 | 2                  | 7.37E-01 | 3                  | 3.50E-01 | 3                  | 3.50E-01 |
| PHC3      | 3   | 4                  | 3.56E-01 | 4                  | 3.56E-01 | 2                  | 3.50E-01 | 2                  | 3.50E-01 | 3                  | 5.27E-01 | 3                  | 5.27E-01 |
| PHAX      | 5   | 1                  | 5.77E-01 | 1                  | 5.77E-01 | 1                  | 3.97E-01 | 1                  | 3.97E-01 | 1                  | 3.50E-01 | 1                  | 3.50E-01 |
| NRG3      | 10  | 3                  | 8.24E-01 | 3                  | 8.24E-01 | 2                  | 3.50E-01 | 2                  | 3.50E-01 | 2                  | 4.73E-01 | 2                  | 4.73E-01 |
| NOTCH1    | 9   | 7                  | 7.18E-01 | 7                  | 7.18E-01 | 5                  | 3.50E-01 | 5                  | 3.50E-01 | 3                  | 4.68E-01 | 3                  | 4.68E-01 |
| FAM173B   | 5   | 4                  | 4.88E-01 | 4                  | 4.88E-01 | 3                  | 3.50E-01 | 3                  | 3.50E-01 | 2                  | 6.29E-01 | 2                  | 6.29E-01 |
| PDE6C     | 10  | 3                  | 1.00E+00 | 3                  | 1.00E+00 | 3                  | 3.50E-01 | 3                  | 3.50E-01 | 2                  | 3.61E-01 | 2                  | 3.61E-01 |
| FCRL3     | 1   | 3                  | 6.46E-01 | 3                  | 6.46E-01 | 3                  | 3.50E-01 | 3                  | 3.50E-01 | 1                  | 4.46E-01 | 1                  | 4.46E-01 |
| ADH1B     | 4   | 5                  | 7.62E-02 | 5                  | 7.62E-02 | 3                  | 6.72E-01 | 3                  | 6.72E-01 | 3                  | 3.50E-01 | 3                  | 3.50E-01 |
| SQRDL     | 15  | 2                  | 8.25E-01 | 2                  | 8.25E-01 | 2                  | 3.51E-01 | 2                  | 3.51E-01 | 1                  | 4.58E-01 | 1                  | 4.58E-01 |
| ZSWIM6    | 5   | 4                  | 7.12E-01 | 4                  | 7.12E-01 | 3                  | 4.14E-01 | 3                  | 4.14E-01 | 2                  | 3.51E-01 | 2                  | 3.51E-01 |
| KIAA1109  | 4   | 5                  | 5.61E-01 | 6                  | 6.95E-01 | 4                  | 3.51E-01 | 5                  | 4.59E-01 | 2                  | 4.01E-01 | 3                  | 3.84E-01 |
| MFNG      | 22  | 5                  | 4.27E-01 | 5                  | 4.27E-01 | 5                  | 3.52E-01 | 5                  | 3.52E-01 | 1                  | 1.00E+00 | 1                  | 1.00E+00 |
| DOPEY1    | 6   | 6                  | 2.03E-01 | 7                  | 1.89E-01 | 3                  | 6.23E-01 | 4                  | 5.63E-01 | 4                  | 4.04E-01 | 5                  | 3.52E-01 |
| MYBPC1    | 12  | 9                  | 3.87E-01 | 10                 | 3.98E-01 | 5                  | 4.69E-01 | 6                  | 3.72E-01 | 4                  | 4.05E-01 | 5                  | 3.52E-01 |
| NAA16     | 13  | 5                  | 5.52E-01 | 5                  | 5.52E-01 | 4                  | 3.52E-01 | 4                  | 3.52E-01 | 2                  | 6.28E-01 | 2                  | 6.28E-01 |
| PREX1     | 20  | 6                  | 6.29E-01 | 6                  | 6.29E-01 | 6                  | 3.52E-01 | 6                  | 3.52E-01 | 2                  | 4.58E-01 | 2                  | 4.58E-01 |
| PRDX3     | 10  | 2                  | 1.00E+00 | 2                  | 1.00E+00 | 2                  | 4.51E-01 | 2                  | 4.51E-01 | 1                  | 3.52E-01 | 1                  | 3.52E-01 |
| PIK3R5    | 17  | 2                  | 3.08E-01 | 2                  | 3.08E-01 | 1                  | 3.52E-01 | 1                  | 3.52E-01 | 1                  | 6.41E-01 | 1                  | 6.41E-01 |
| RPS6KA1   | 1   | 1                  | 5.82E-01 | 1                  | 5.82E-01 | 1                  | 3.52E-01 | 1                  | 3.52E-01 |                    |          |                    |          |
| WDPCP     | 2   | 2                  | 9.89E-02 | 2                  | 9.89E-02 | 1                  | 3.52E-01 | 1                  | 3.52E-01 | 2                  | 6.38E-01 | 2                  | 6.38E-01 |
| DNAJC3    | 13  | 1                  | 5.82E-01 | 1                  | 5.82E-01 | 1                  | 3.52E-01 | 1                  | 3.52E-01 |                    |          |                    |          |
| SERPINB13 | 18  | 1                  | 5.82E-01 | 1                  | 5.82E-01 | 1                  | 3.52E-01 | 1                  | 3.52E-01 |                    |          |                    |          |
| TAF1C     | 16  | 2                  | 5.65E-01 | 2                  | 5.65E-01 | 1                  | 3.52E-01 | 1                  | 3.52E-01 | 2                  | 4.66E-01 | 2                  | 4.66E-01 |
| PDLIM5    | 4   | 4                  | 1.26E-01 | 4                  | 1.26E-01 | 4                  | 3.53E-01 | 4                  | 3.53E-01 | 1                  | 6.17E-01 | 1                  | 6.17E-01 |
| ACADS     | 12  | 6                  | 6.64E-01 | 6                  | 6.64E-01 | 4                  | 3.53E-01 | 4                  | 3.53E-01 | 3                  | 4.02E-01 | 3                  | 4.02E-01 |
| C5orf45   | 5   | 2                  | 5.57E-01 | 2                  | 5.57E-01 | 1                  | 5.31E-01 | 1                  | 5.31E-01 | 2                  | 3.53E-01 | 2                  | 3.53E-01 |
| ADAMTS17  | 15  | 6                  | 4.77E-01 | 6                  | 4.77E-01 | 4                  | 5.11E-01 | 4                  | 5.11E-01 | 3                  | 3.53E-01 | 3                  | 3.53E-01 |
| NLRP8     | 19  | 6                  | 8.44E-01 | 9                  | 7.22E-01 | 5                  | 5.69E-01 | 8                  | 3.53E-01 | 5                  | 5.34E-01 | 8                  | 6.21E-01 |
| RC3H1     | 1   | 3                  | 3.17E-02 | 3                  | 3.17E-02 | 3                  | 3.53E-01 | 3                  | 3.53E-01 | 1                  | 1.00E+00 | 1                  | 1.00E+00 |
| PDX1      | 13  | 3                  | 1.00E+00 | 3                  | 1.00E+00 | 3                  | 3.53E-01 | 3                  | 3.53E-01 | 2                  | 4.67E-01 | 2                  | 4.67E-01 |
| IFIH1     | 2   | 15                 | 2.08E-01 | 15                 | 2.08E-01 | 10                 | 7.33E-01 | 10                 | 7.33E-01 | 9                  | 3.53E-01 | 9                  | 3.53E-01 |
| SALL3     | 18  | 7                  | 2.28E-01 | 7                  | 2.28E-01 | 4                  | 3.54E-01 | 4                  | 3.54E-01 | 3                  | 4.99E-01 | 3                  | 4.99E-01 |
| PNMT      | 17  | 5                  | 6.43E-01 | 5                  | 6.43E-01 | 5                  | 3.54E-01 | 5                  | 3.54E-01 | 3                  | 3.65E-01 | 3                  | 3.65E-01 |
| ERCC6     | 10  | 7                  | 5.93E-01 | 7                  | 5.93E-01 | 6                  | 3.88E-01 | 6                  | 3.88E-01 | 4                  | 3.54E-01 | 4                  | 3.54E-01 |
| RBM19     | 12  | 5                  | 3.06E-01 | 6                  | 3.06E-01 | 5                  | 3.54E-01 | 6                  | 3.54E-01 | 1                  | 4.47E-01 | 2                  | 4.48E-01 |

| SetID       | Chr | ADEH- vs NA        |          |                    |          | ADEH+ vs ADEH-     |          |                    |          | ADEH+ vs NA        |          |                    |          |
|-------------|-----|--------------------|----------|--------------------|----------|--------------------|----------|--------------------|----------|--------------------|----------|--------------------|----------|
|             |     | rarenovel          |          | all                |          | rarenovel          |          | all                |          | rarenovel          |          | all                |          |
|             |     | N variants in test | p-value  | N variants in test | p-value  | N variants in test | p-value  | N variants in test | p-value  | N variants in test | p-value  | N variants in test | p-value  |
| GALNT8      | 12  | 7                  | 3.07E-02 | 7                  | 3.07E-02 | 4                  | 3.79E-01 | 4                  | 3.79E-01 | 5                  | 3.55E-01 | 5                  | 3.55E-01 |
| SMOC2       | 6   | 4                  | 1.00E+00 | 4                  | 1.00E+00 | 3                  | 3.55E-01 | 3                  | 3.55E-01 | 2                  | 3.61E-01 | 2                  | 3.61E-01 |
| CTNND1      | 11  | 5                  | 3.17E-01 | 5                  | 3.17E-01 | 5                  | 3.55E-01 | 5                  | 3.55E-01 | 1                  | 6.64E-01 | 1                  | 6.64E-01 |
| RRP12       | 10  | 6                  | 7.29E-01 | 6                  | 7.29E-01 | 5                  | 3.55E-01 | 5                  | 3.55E-01 | 2                  | 4.73E-01 | 2                  | 4.73E-01 |
| NOC4L       | 12  | 7                  | 1.00E+00 | 7                  | 1.00E+00 | 6                  | 3.55E-01 | 6                  | 3.55E-01 | 3                  | 3.81E-01 | 3                  | 3.81E-01 |
| LIN37       | 19  | 2                  | 7.91E-02 | 2                  | 7.91E-02 | 2                  | 3.55E-01 | 2                  | 3.55E-01 |                    |          |                    |          |
| SEMA4G      | 10  | 3                  | 1.00E+00 | 3                  | 1.00E+00 | 3                  | 3.58E-01 | 3                  | 3.58E-01 | 2                  | 3.55E-01 | 2                  | 3.55E-01 |
| OLFML1      | 11  | 1                  | 5.34E-01 | 1                  | 5.34E-01 | 1                  | 1.00E+00 | 1                  | 1.00E+00 | 1                  | 3.55E-01 | 1                  | 3.55E-01 |
| HEATR1      | 1   | 11                 | 7.50E-01 | 12                 | 7.50E-01 | 8                  | 3.56E-01 | 9                  | 3.55E-01 | 3                  | 4.90E-01 | 4                  | 4.90E-01 |
| OR11H6      | 14  | 2                  | 2.39E-01 | 5                  | 3.51E-01 | 1                  | 4.16E-01 | 4                  | 3.55E-01 | 2                  | 4.43E-01 | 5                  | 3.57E-01 |
| MTFR2       | 6   | 2                  | 7.65E-01 | 2                  | 7.65E-01 | 2                  | 3.56E-01 | 2                  | 3.56E-01 | 2                  | 4.69E-01 | 2                  | 4.69E-01 |
| XRCC1       | 19  | 2                  | 2.03E-01 | 3                  | 6.02E-01 | 2                  | 5.16E-01 | 3                  | 3.56E-01 |                    |          | 1                  | 3.73E-01 |
| ADAM17      | 2   | 3                  | 5.81E-01 | 3                  | 5.81E-01 | 2                  | 4.46E-01 | 2                  | 4.46E-01 | 2                  | 3.56E-01 | 2                  | 3.56E-01 |
| C11orf16    | 11  | 1                  | 5.13E-01 | 1                  | 5.13E-01 | 1                  | 3.56E-01 | 1                  | 3.56E-01 | 1                  | 6.04E-01 | 1                  | 6.04E-01 |
| RAB33B      | 4   | 2                  | 8.95E-01 | 2                  | 8.95E-01 | 2                  | 4.96E-01 | 2                  | 4.96E-01 | 1                  | 3.56E-01 | 1                  | 3.56E-01 |
| EFNA4       | 1   | 2                  | 1.82E-01 | 2                  | 1.82E-01 | 1                  | 7.03E-01 | 1                  | 7.03E-01 | 2                  | 3.56E-01 | 2                  | 3.56E-01 |
| COL6A5      | 3   | 16                 | 9.01E-01 | 17                 | 9.01E-01 | 13                 | 4.72E-01 | 14                 | 4.72E-01 | 11                 | 3.57E-01 | 12                 | 3.57E-01 |
| C1orf27     | 1   | 2                  | 8.61E-01 | 2                  | 8.61E-01 | 2                  | 3.57E-01 | 2                  | 3.57E-01 | 1                  | 3.69E-01 | 1                  | 3.69E-01 |
| SLC6A7      | 5   | 7                  | 5.74E-01 | 7                  | 5.74E-01 | 6                  | 3.57E-01 | 6                  | 3.57E-01 | 2                  | 6.36E-01 | 2                  | 6.36E-01 |
| FAM208B     | 10  | 5                  | 1.42E-01 | 5                  | 1.42E-01 | 5                  | 1.00E+00 | 5                  | 1.00E+00 | 1                  | 3.58E-01 | 1                  | 3.58E-01 |
| ADAM15      | 1   | 5                  | 6.27E-01 | 5                  | 6.27E-01 | 3                  | 3.58E-01 | 3                  | 3.58E-01 | 4                  | 4.12E-01 | 4                  | 4.12E-01 |
| TMEM260     | 14  | 2                  | 5.83E-01 | 3                  | 1.65E-01 | 2                  | 6.29E-01 | 3                  | 3.58E-01 |                    |          | 1                  | 3.61E-01 |
| SCG3        | 15  | 5                  | 2.51E-01 | 5                  | 2.51E-01 | 2                  | 6.31E-01 | 2                  | 6.31E-01 | 3                  | 3.58E-01 | 3                  | 3.58E-01 |
| SLC2A6      | 9   | 1                  | 8.38E-02 | 2                  | 2.57E-01 |                    |          | 1                  | 3.58E-01 | 1                  | 6.72E-01 | 2                  | 8.11E-01 |
| ZFR2        | 19  | 9                  | 7.36E-01 | 9                  | 7.36E-01 | 8                  | 3.58E-01 | 8                  | 3.58E-01 | 5                  | 4.05E-01 | 5                  | 4.05E-01 |
| PRIM1       | 12  | 4                  | 8.22E-01 | 5                  | 8.19E-01 | 3                  | 7.15E-01 | 4                  | 3.58E-01 | 1                  | 6.18E-01 | 2                  | 4.84E-01 |
| ABCC4       | 13  | 7                  | 2.54E-01 | 7                  | 2.54E-01 | 6                  | 5.02E-01 | 6                  | 5.02E-01 | 3                  | 3.58E-01 | 3                  | 3.58E-01 |
| SLCO1B1     | 12  |                    |          | 1                  | 8.01E-01 |                    |          | 1                  | 3.58E-01 |                    |          | 1                  | 3.95E-01 |
| DNAJA4      | 15  | 4                  | 3.24E-01 | 4                  | 3.24E-01 | 2                  | 1.00E+00 | 2                  | 1.00E+00 | 3                  | 3.58E-01 | 3                  | 3.58E-01 |
| PKD1L1      | 7   | 10                 | 4.52E-01 | 11                 | 4.52E-01 | 8                  | 3.99E-01 | 9                  | 3.99E-01 | 3                  | 3.58E-01 | 4                  | 3.58E-01 |
| LINGO4      | 1   | 3                  | 1.16E-03 | 3                  | 1.16E-03 |                    |          |                    |          | 3                  | 3.58E-01 | 3                  | 3.58E-01 |
| ENTHD2      | 17  | 2                  | 3.20E-02 | 2                  | 3.20E-02 | 1                  | 4.78E-01 | 1                  | 4.78E-01 | 2                  | 3.58E-01 | 2                  | 3.58E-01 |
| CEP63       | 3   | 3                  | 1.73E-01 | 3                  | 1.73E-01 | 2                  | 1.00E+00 | 2                  | 1.00E+00 | 2                  | 3.58E-01 | 2                  | 3.58E-01 |
| UGGT1       | 2   | 4                  | 1.00E+00 | 4                  | 1.00E+00 | 3                  | 3.59E-01 | 3                  | 3.59E-01 | 2                  | 5.04E-01 | 2                  | 5.04E-01 |
| OR5K1       | 3   | 4                  | 4.18E-01 | 4                  | 4.18E-01 | 4                  | 1.00E+00 | 4                  | 1.00E+00 | 1                  | 3.59E-01 | 1                  | 3.59E-01 |
| ZNF343      | 20  | 3                  | 1.00E+00 | 3                  | 1.00E+00 | 3                  | 3.60E-01 | 3                  | 3.60E-01 | 2                  | 3.59E-01 | 2                  | 3.59E-01 |
| CCDC39      | 3   | 5                  | 1.05E-01 | 5                  | 1.05E-01 | 5                  | 3.59E-01 | 5                  | 3.59E-01 | 2                  | 7.34E-01 | 2                  | 7.34E-01 |
| SKIV2L      | 6   | 8                  | 3.02E-01 | 8                  | 3.02E-01 | 7                  | 1.00E+00 | 7                  | 1.00E+00 | 3                  | 3.59E-01 | 3                  | 3.59E-01 |
| PYGM        | 11  | 5                  | 3.61E-01 | 5                  | 3.61E-01 | 5                  | 3.59E-01 | 5                  | 3.59E-01 | 3                  | 4.47E-01 | 3                  | 4.47E-01 |
| CORO7       | 16  | 6                  | 2.66E-01 | 7                  | 2.66E-01 | 5                  | 3.60E-01 | 6                  | 3.60E-01 | 3                  | 1.00E+00 | 4                  | 1.00E+00 |
| CORO7-PAM16 | 16  | 6                  | 2.66E-01 | 7                  | 2.66E-01 | 5                  | 3.60E-01 | 6                  | 3.60E-01 | 3                  | 1.00E+00 | 4                  | 1.00E+00 |
| MBL2        | 10  | 3                  | 4.05E-02 | 5                  | 1.18E-01 | 1                  | 1.00E+00 | 3                  | 1.00E+00 | 3                  | 3.60E-01 | 5                  | 7.25E-01 |
| SPAG9       | 17  | 2                  | 7.62E-02 | 2                  | 7.62E-02 | 2                  | 5.73E-01 | 2                  | 5.73E-01 | 1                  | 3.60E-01 | 1                  | 3.60E-01 |
| USP19       | 3   | 8                  | 3.56E-01 | 8                  | 3.56E-01 | 6                  | 3.60E-01 | 6                  | 3.60E-01 | 3                  | 3.70E-01 | 3                  | 3.70E-01 |
| STARD9      | 15  | 8                  | 7.29E-01 | 8                  | 7.29E-01 | 6                  | 3.60E-01 | 6                  | 3.60E-01 | 3                  | 4.87E-01 | 3                  | 4.87E-01 |
| PDCD11      | 10  | 12                 | 8.33E-01 | 12                 | 8.33E-01 | 8                  | 4.36E-01 | 8                  | 4.36E-01 | 8                  | 3.60E-01 | 8                  | 3.60E-01 |
| CCDC130     | 19  | 2                  | 8.17E-01 | 2                  | 8.17E-01 | 2                  | 3.61E-01 | 2                  | 3.61E-01 | 1                  | 3.68E-01 | 1                  | 3.68E-01 |
| ZNF214      | 11  | 3                  | 9.53E-02 | 3                  | 9.53E-02 | 3                  | 3.61E-01 | 3                  | 3.61E-01 |                    |          |                    |          |

| SetID     | Chr | ADEH- vs NA        |          |                    |          | ADEH+ vs ADEH-     |          |                    |          | ADEH+ vs NA        |          |                    |          |
|-----------|-----|--------------------|----------|--------------------|----------|--------------------|----------|--------------------|----------|--------------------|----------|--------------------|----------|
|           |     | rarenovel          |          | all                |          | rarenovel          |          | all                |          | rarenovel          |          | all                |          |
|           |     | N variants in test | p-value  | N variants in test | p-value  | N variants in test | p-value  | N variants in test | p-value  | N variants in test | p-value  | N variants in test | p-value  |
| SLC26A4   | 7   | 7                  | 7.15E-01 | 7                  | 7.15E-01 | 5                  | 3.72E-01 | 5                  | 3.72E-01 | 4                  | 3.61E-01 | 4                  | 3.61E-01 |
| ABCC8     | 11  | 10                 | 4.62E-01 | 10                 | 4.62E-01 | 6                  | 4.60E-01 | 6                  | 4.60E-01 | 4                  | 3.62E-01 | 4                  | 3.62E-01 |
| LRRC43    | 12  | 3                  | 1.75E-01 | 3                  | 1.75E-01 | 3                  | 3.62E-01 | 3                  | 3.62E-01 | 1                  | 6.44E-01 | 1                  | 6.44E-01 |
| HDDC3     | 15  | 1                  | 1.00E+00 | 1                  | 1.00E+00 | 1                  | 3.62E-01 | 1                  | 3.62E-01 | 1                  | 4.49E-01 | 1                  | 4.49E-01 |
| DISC1     | 1   | 2                  | 2.21E-02 | 4                  | 2.47E-02 |                    |          | 2                  | 3.62E-01 | 2                  | 6.24E-01 | 4                  | 7.05E-01 |
| OR2L8     | 1   | 3                  | 4.39E-01 | 4                  | 5.31E-01 | 3                  | 3.62E-01 | 4                  | 3.74E-01 | 2                  | 6.82E-01 | 3                  | 6.58E-01 |
| RAB11FIP1 | 8   | 4                  | 4.43E-01 | 4                  | 4.43E-01 | 4                  | 3.62E-01 | 4                  | 3.62E-01 | 3                  | 1.00E+00 | 3                  | 1.00E+00 |
| TIGD6     | 5   | 1                  | 1.16E-01 | 1                  | 1.16E-01 | 1                  | 3.62E-01 | 1                  | 3.62E-01 |                    |          |                    |          |
| SKI       | 1   |                    |          | 1                  | 3.05E-01 |                    |          | 1                  | 8.66E-01 |                    |          | 1                  | 3.62E-01 |
| ZPLD1     | 3   | 1                  | 3.97E-01 | 1                  | 3.97E-01 | 1                  | 3.63E-01 | 1                  | 3.63E-01 |                    |          |                    |          |
| OR1J2     | 9   | 2                  | 1.40E-01 | 2                  | 1.40E-01 | 2                  | 3.63E-01 | 2                  | 3.63E-01 | 2                  | 6.69E-01 | 2                  | 6.69E-01 |
| ANGPTL5   | 11  | 4                  | 2.70E-01 | 4                  | 2.70E-01 | 2                  | 3.63E-01 | 2                  | 3.63E-01 | 3                  | 7.39E-01 | 3                  | 7.39E-01 |
| DCAF4     | 14  | 7                  | 8.41E-01 | 7                  | 8.41E-01 | 6                  | 3.99E-01 | 6                  | 3.99E-01 | 5                  | 3.63E-01 | 5                  | 3.63E-01 |
| INSRR     | 1   | 7                  | 1.62E-01 | 7                  | 1.62E-01 | 7                  | 3.63E-01 | 7                  | 3.63E-01 | 1                  | 6.41E-01 | 1                  | 6.41E-01 |
| TNS2      | 12  | 9                  | 3.84E-01 | 9                  | 3.84E-01 | 5                  | 3.63E-01 | 5                  | 3.63E-01 | 5                  | 5.66E-01 | 5                  | 5.66E-01 |
| NKX2-5    | 5   | 1                  | 1.29E-01 | 1                  | 1.29E-01 | 1                  | 3.63E-01 | 1                  | 3.63E-01 |                    |          |                    |          |
| NEIL3     | 4   | 2                  | 3.91E-01 | 2                  | 3.91E-01 | 2                  | 3.63E-01 | 2                  | 3.63E-01 | 1                  | 6.41E-01 | 1                  | 6.41E-01 |
| SORCS2    | 4   | 7                  | 1.49E-01 | 7                  | 1.49E-01 | 4                  | 3.64E-01 | 4                  | 3.64E-01 | 4                  | 7.71E-01 | 4                  | 7.71E-01 |
| NFXL1     | 4   | 3                  | 1.85E-02 | 4                  | 1.85E-02 | 2                  | 6.03E-01 | 3                  | 6.01E-01 | 2                  | 3.64E-01 | 3                  | 3.64E-01 |
| TMC1      | 9   | 10                 | 5.29E-01 | 10                 | 5.29E-01 | 9                  | 3.64E-01 | 9                  | 3.64E-01 | 3                  | 7.29E-01 | 3                  | 7.29E-01 |
| KRT25     | 17  | 3                  | 8.14E-01 | 3                  | 8.14E-01 | 2                  | 3.64E-01 | 2                  | 3.64E-01 | 2                  | 4.66E-01 | 2                  | 4.66E-01 |
| IRAK2     | 3   | 2                  | 5.49E-01 | 3                  | 5.49E-01 | 2                  | 7.46E-01 | 3                  | 7.46E-01 | 2                  | 3.64E-01 | 3                  | 3.64E-01 |
| IL17RC    | 3   | 1                  | 4.40E-01 | 1                  | 4.40E-01 | 1                  | 3.64E-01 | 1                  | 3.64E-01 | 1                  | 1.00E+00 | 1                  | 1.00E+00 |
| KIAA1024  | 15  | 6                  | 6.42E-01 | 7                  | 6.58E-01 | 5                  | 3.64E-01 | 6                  | 4.99E-01 | 4                  | 7.28E-01 | 5                  | 7.68E-01 |
| GUCY2C    | 12  | 4                  | 1.01E-01 | 4                  | 1.01E-01 | 3                  | 6.28E-01 | 3                  | 6.28E-01 | 2                  | 3.64E-01 | 2                  | 3.64E-01 |
| OSBPL7    | 17  | 3                  | 5.30E-01 | 3                  | 5.30E-01 | 3                  | 5.21E-01 | 3                  | 5.21E-01 | 1                  | 3.64E-01 | 1                  | 3.64E-01 |
| PUS10     | 2   | 2                  | 9.02E-02 | 2                  | 9.02E-02 | 2                  | 3.64E-01 | 2                  | 3.64E-01 |                    |          |                    |          |
| SCRIB     | 8   | 10                 | 3.95E-01 | 10                 | 3.95E-01 | 9                  | 3.64E-01 | 9                  | 3.64E-01 | 2                  | 6.41E-01 | 2                  | 6.41E-01 |
| WDR86     | 7   | 4                  | 8.13E-01 | 4                  | 8.13E-01 | 3                  | 3.64E-01 | 3                  | 3.64E-01 | 2                  | 4.91E-01 | 2                  | 4.91E-01 |
| ABCB1     | 7   | 4                  | 5.09E-01 | 4                  | 5.09E-01 | 4                  | 6.77E-01 | 4                  | 6.77E-01 | 1                  | 3.64E-01 | 1                  | 3.64E-01 |
| WDR6      | 3   | 7                  | 8.97E-01 | 7                  | 8.97E-01 | 6                  | 3.64E-01 | 6                  | 3.64E-01 | 4                  | 3.82E-01 | 4                  | 3.82E-01 |
| ADRA1D    | 20  | 4                  | 2.86E-01 | 4                  | 2.86E-01 | 4                  | 3.65E-01 | 4                  | 3.65E-01 | 1                  | 6.08E-01 | 1                  | 6.08E-01 |
| PSRC1     | 1   | 2                  | 2.98E-01 | 2                  | 2.98E-01 | 2                  | 3.65E-01 | 2                  | 3.65E-01 | 2                  | 4.92E-01 | 2                  | 4.92E-01 |
| GSG2      | 17  | 1                  | 5.63E-01 | 1                  | 5.63E-01 | 1                  | 3.65E-01 | 1                  | 3.65E-01 | 1                  | 5.98E-01 | 1                  | 5.98E-01 |
| SHROOM3   | 4   | 10                 | 4.34E-01 | 11                 | 4.37E-01 | 8                  | 3.65E-01 | 9                  | 3.77E-01 | 7                  | 6.89E-01 | 8                  | 7.51E-01 |
| GNB3      | 12  |                    |          | 1                  | 1.96E-01 |                    |          | 1                  | 1.00E+00 |                    |          | 1                  | 3.65E-01 |
| SUGCT     | 7   | 3                  | 5.84E-01 | 3                  | 5.84E-01 | 1                  | 3.65E-01 | 1                  | 3.65E-01 | 3                  | 3.85E-01 | 3                  | 3.85E-01 |
| CCDC169   | 13  | 2                  | 5.92E-01 | 3                  | 5.92E-01 | 2                  | 6.34E-01 | 3                  | 6.34E-01 |                    |          | 1                  | 3.65E-01 |
| ZNF556    | 19  | 5                  | 4.78E-01 | 5                  | 4.78E-01 | 4                  | 5.95E-01 | 4                  | 5.95E-01 | 3                  | 3.65E-01 | 3                  | 3.65E-01 |
| SAMD3     | 6   | 3                  | 1.03E-01 | 3                  | 1.03E-01 | 1                  | 5.17E-01 | 1                  | 5.17E-01 | 3                  | 3.65E-01 | 3                  | 3.65E-01 |
| ABCA10    | 17  | 8                  | 2.95E-01 | 9                  | 4.00E-01 | 6                  | 6.18E-01 | 7                  | 6.07E-01 | 4                  | 3.65E-01 | 5                  | 4.12E-01 |
| NACAD     | 7   | 4                  | 2.51E-01 | 5                  | 2.64E-01 | 4                  | 3.78E-01 | 5                  | 3.66E-01 | 1                  | 1.00E+00 | 2                  | 1.00E+00 |
| AMBRA1    | 11  | 5                  | 3.02E-01 | 5                  | 3.02E-01 | 4                  | 5.05E-01 | 4                  | 5.05E-01 | 2                  | 3.66E-01 | 2                  | 3.66E-01 |
| SLC6A5    | 11  | 6                  | 2.63E-01 | 6                  | 2.63E-01 | 6                  | 3.66E-01 | 6                  | 3.66E-01 | 1                  | 6.19E-01 | 1                  | 6.19E-01 |
| PCLO      | 7   | 12                 | 6.87E-01 | 12                 | 6.87E-01 | 9                  | 3.66E-01 | 9                  | 3.66E-01 | 3                  | 5.23E-01 | 3                  | 5.23E-01 |
| CEP97     | 3   | 3                  | 1.00E+00 | 3                  | 1.00E+00 | 3                  | 3.86E-01 | 3                  | 3.86E-01 | 2                  | 3.66E-01 | 2                  | 3.66E-01 |
| KIF13B    | 8   | 8                  | 1.94E-01 | 8                  | 1.94E-01 | 7                  | 3.66E-01 | 7                  | 3.66E-01 | 2                  | 1.00E+00 | 2                  | 1.00E+00 |
| GPT       | 8   | 4                  | 2.29E-01 | 4                  | 2.29E-01 | 3                  | 3.66E-01 | 3                  | 3.66E-01 | 1                  | 6.15E-01 | 1                  | 6.15E-01 |

| SetID    | Chr | ADEH- vs NA        |          |                    |          | ADEH+ vs ADEH-     |          |                    |          | ADEH+ vs NA        |          |                    |          |
|----------|-----|--------------------|----------|--------------------|----------|--------------------|----------|--------------------|----------|--------------------|----------|--------------------|----------|
|          |     | rarenovel          |          | all                |          | rarenovel          |          | all                |          | rarenovel          |          | all                |          |
|          |     | N variants in test | p-value  | N variants in test | p-value  | N variants in test | p-value  | N variants in test | p-value  | N variants in test | p-value  | N variants in test | p-value  |
| VSIG10   | 12  | 4                  | 2.80E-01 | 4                  | 2.80E-01 | 2                  | 4.54E-01 | 2                  | 4.54E-01 | 3                  | 3.67E-01 | 3                  | 3.67E-01 |
| ATG2A    | 11  | 10                 | 3.55E-01 | 10                 | 3.55E-01 | 8                  | 6.82E-01 | 8                  | 6.82E-01 | 3                  | 3.67E-01 | 3                  | 3.67E-01 |
| ART4     | 12  | 1                  | 1.62E-01 | 1                  | 1.62E-01 | 1                  | 3.67E-01 | 1                  | 3.67E-01 |                    |          |                    |          |
| OR9G4    | 11  | 3                  | 1.59E-01 | 4                  | 2.09E-01 | 3                  | 1.00E+00 | 4                  | 1.00E+00 | 1                  | 3.67E-01 | 2                  | 5.56E-01 |
| UTP18    | 17  | 2                  | 1.54E-01 | 2                  | 1.54E-01 | 1                  | 3.67E-01 | 1                  | 3.67E-01 | 1                  | 6.36E-01 | 1                  | 6.36E-01 |
| BDH2     | 4   | 2                  | 2.09E-01 | 2                  | 2.09E-01 | 1                  | 4.32E-01 | 1                  | 4.32E-01 | 2                  | 3.67E-01 | 2                  | 3.67E-01 |
| OR4C6    | 11  | 1                  | 1.82E-01 | 1                  | 1.82E-01 | 1                  | 3.67E-01 | 1                  | 3.67E-01 |                    |          |                    |          |
| UTP11L   | 1   | 1                  | 7.84E-01 | 1                  | 7.84E-01 | 1                  | 3.67E-01 | 1                  | 3.67E-01 | 1                  | 1.00E+00 | 1                  | 1.00E+00 |
| TM6SF2   | 19  | 5                  | 8.41E-01 | 5                  | 8.41E-01 | 5                  | 7.35E-01 | 5                  | 7.35E-01 | 4                  | 3.67E-01 | 4                  | 3.67E-01 |
| CNTN1    | 12  | 2                  | 2.52E-03 | 2                  | 2.52E-03 |                    |          |                    |          | 2                  | 3.67E-01 | 2                  | 3.67E-01 |
| MIOX     | 22  | 3                  | 2.63E-03 | 3                  | 2.63E-03 |                    |          |                    |          | 3                  | 3.67E-01 | 3                  | 3.67E-01 |
| GPR15    | 3   | 3                  | 8.70E-02 | 3                  | 8.70E-02 | 3                  | 3.67E-01 | 3                  | 3.67E-01 |                    |          |                    |          |
| CCIN     | 9   | 4                  | 7.32E-01 | 4                  | 7.32E-01 | 3                  | 3.68E-01 | 3                  | 3.68E-01 | 2                  | 6.48E-01 | 2                  | 6.48E-01 |
| SOHLH1   | 9   | 1                  | 5.67E-01 | 1                  | 5.67E-01 | 1                  | 3.68E-01 | 1                  | 3.68E-01 | 1                  | 6.04E-01 | 1                  | 6.04E-01 |
| DIS3L2   | 2   | 3                  | 7.14E-01 | 3                  | 7.14E-01 | 3                  | 4.23E-01 | 3                  | 4.23E-01 | 2                  | 3.68E-01 | 2                  | 3.68E-01 |
| TMC7     | 16  | 3                  | 5.43E-01 | 3                  | 5.43E-01 | 3                  | 3.68E-01 | 3                  | 3.68E-01 | 2                  | 6.39E-01 | 2                  | 6.39E-01 |
| SULT1C2  | 2   | 3                  | 2.60E-01 | 3                  | 2.60E-01 | 2                  | 7.71E-01 | 2                  | 7.71E-01 | 2                  | 3.68E-01 | 2                  | 3.68E-01 |
| NPDC1    | 9   | 5                  | 6.41E-01 | 5                  | 6.41E-01 | 3                  | 5.68E-01 | 3                  | 5.68E-01 | 3                  | 3.68E-01 | 3                  | 3.68E-01 |
| MAP9     | 4   | 2                  | 7.49E-02 | 2                  | 7.49E-02 | 1                  | 4.46E-01 | 1                  | 4.46E-01 | 2                  | 3.68E-01 | 2                  | 3.68E-01 |
| SBF1     | 22  | 9                  | 8.06E-01 | 9                  | 8.06E-01 | 7                  | 3.68E-01 | 7                  | 3.68E-01 | 3                  | 4.94E-01 | 3                  | 4.94E-01 |
| CCDC88B  | 11  | 5                  | 7.00E-01 | 5                  | 7.00E-01 | 4                  | 3.68E-01 | 4                  | 3.68E-01 | 2                  | 6.40E-01 | 2                  | 6.40E-01 |
| LLPH     | 12  | 1                  | 1.00E+00 | 1                  | 1.00E+00 | 1                  | 3.69E-01 | 1                  | 3.69E-01 | 1                  | 4.37E-01 | 1                  | 4.37E-01 |
| CERS4    | 19  | 2                  | 1.18E-01 | 2                  | 1.18E-01 | 2                  | 1.00E+00 | 2                  | 1.00E+00 | 1                  | 3.69E-01 | 1                  | 3.69E-01 |
| OLFML2A  | 9   | 8                  | 1.93E-01 | 8                  | 1.93E-01 | 5                  | 4.80E-01 | 5                  | 4.80E-01 | 3                  | 3.69E-01 | 3                  | 3.69E-01 |
| HRASLS5  | 11  | 2                  | 4.19E-01 | 2                  | 4.19E-01 | 2                  | 3.69E-01 | 2                  | 3.69E-01 | 1                  | 6.57E-01 | 1                  | 6.57E-01 |
| BPIFB4   | 20  | 2                  | 8.68E-02 | 2                  | 8.68E-02 | 1                  | 4.67E-01 | 1                  | 4.67E-01 | 2                  | 3.69E-01 | 2                  | 3.69E-01 |
| NXPE1    | 11  | 4                  | 2.30E-01 | 5                  | 2.30E-01 | 4                  | 1.00E+00 | 5                  | 1.00E+00 | 2                  | 3.69E-01 | 3                  | 3.69E-01 |
| ITGA10   | 1   | 2                  | 1.54E-01 | 2                  | 1.54E-01 | 1                  | 1.00E+00 | 1                  | 1.00E+00 | 2                  | 3.69E-01 | 2                  | 3.69E-01 |
| PRDM10   | 11  | 6                  | 6.19E-01 | 6                  | 6.19E-01 | 5                  | 3.69E-01 | 5                  | 3.69E-01 | 2                  | 6.41E-01 | 2                  | 6.41E-01 |
| PARP15   | 3   | 1                  | 8.32E-02 | 2                  | 1.09E-01 |                    |          | 1                  | 3.70E-01 | 1                  | 6.48E-01 | 2                  | 7.32E-01 |
| APOB     | 2   | 22                 | 3.83E-01 | 23                 | 3.84E-01 | 21                 | 4.55E-01 | 22                 | 4.51E-01 | 8                  | 3.70E-01 | 9                  | 3.70E-01 |
| GDNF     | 5   | 1                  | 5.81E-01 | 1                  | 5.81E-01 | 1                  | 3.70E-01 | 1                  | 3.70E-01 | 1                  | 6.36E-01 | 1                  | 6.36E-01 |
| HAVCR2   | 5   | 2                  | 8.00E-01 | 2                  | 8.00E-01 | 1                  | 3.70E-01 | 1                  | 3.70E-01 | 2                  | 1.00E+00 | 2                  | 1.00E+00 |
| CPT2     | 1   | 3                  | 7.98E-01 | 3                  | 7.98E-01 | 2                  | 5.14E-01 | 2                  | 5.14E-01 | 3                  | 3.70E-01 | 3                  | 3.70E-01 |
| ANXA5    | 4   | 3                  | 3.80E-01 | 3                  | 3.80E-01 | 3                  | 3.70E-01 | 3                  | 3.70E-01 | 1                  | 6.34E-01 | 1                  | 6.34E-01 |
| CCNB2    | 15  | 3                  | 7.82E-01 | 3                  | 7.82E-01 | 3                  | 3.70E-01 | 3                  | 3.70E-01 | 1                  | 4.57E-01 | 1                  | 4.57E-01 |
| ACOT11   | 1   | 1                  | 5.69E-01 | 1                  | 5.69E-01 | 1                  | 3.70E-01 | 1                  | 3.70E-01 | 1                  | 6.55E-01 | 1                  | 6.55E-01 |
| OR2M3    | 1   | 2                  | 1.00E+00 | 2                  | 1.00E+00 | 2                  | 3.70E-01 | 2                  | 3.70E-01 | 2                  | 3.79E-01 | 2                  | 3.79E-01 |
| MYBPC2   | 19  | 8                  | 2.44E-01 | 8                  | 2.44E-01 | 6                  | 3.70E-01 | 6                  | 3.70E-01 | 4                  | 6.35E-01 | 4                  | 6.35E-01 |
| MKI67    | 10  | 10                 | 1.50E-01 | 13                 | 1.27E-01 | 9                  | 1.00E+00 | 12                 | 1.00E+00 | 6                  | 5.96E-01 | 9                  | 3.70E-01 |
| KIAA0232 | 4   | 6                  | 2.57E-01 | 6                  | 2.57E-01 | 6                  | 3.71E-01 | 6                  | 3.71E-01 | 1                  | 6.30E-01 | 1                  | 6.30E-01 |
| KL       | 13  | 5                  | 1.90E-01 | 6                  | 1.94E-01 | 2                  | 3.71E-01 | 3                  | 3.74E-01 | 4                  | 4.01E-01 | 5                  | 4.04E-01 |
| ZNF552   | 19  | 1                  | 6.36E-03 | 1                  | 6.36E-03 |                    |          |                    |          | 1                  | 3.71E-01 | 1                  | 3.71E-01 |
| CYP4V2   | 4   | 2                  | 8.68E-02 | 2                  | 8.68E-02 | 2                  | 3.71E-01 | 2                  | 3.71E-01 |                    |          |                    |          |
| CUL7     | 6   | 9                  | 1.00E+00 | 9                  | 1.00E+00 | 8                  | 3.71E-01 | 8                  | 3.71E-01 | 6                  | 5.03E-01 | 6                  | 5.03E-01 |
| SLC17A1  | 6   | 6                  | 3.16E-01 | 6                  | 3.16E-01 | 5                  | 3.71E-01 | 5                  | 3.71E-01 | 2                  | 4.54E-01 | 2                  | 4.54E-01 |
| APC2     | 19  | 8                  | 5.64E-02 | 8                  | 5.64E-02 | 4                  | 3.71E-01 | 4                  | 3.71E-01 | 5                  | 7.61E-01 | 5                  | 7.61E-01 |
| AASDH    | 4   | 5                  | 6.48E-01 | 5                  | 6.48E-01 | 4                  | 3.71E-01 | 4                  | 3.71E-01 | 3                  | 3.77E-01 | 3                  | 3.77E-01 |

| SetID    | Chr | ADEH- vs NA        |          |                    |          | ADEH+ vs ADEH-     |          |                    |          | ADEH+ vs NA        |          |                    |          |
|----------|-----|--------------------|----------|--------------------|----------|--------------------|----------|--------------------|----------|--------------------|----------|--------------------|----------|
|          |     | rarenovel          |          | all                |          | rarenovel          |          | all                |          | rarenovel          |          | all                |          |
|          |     | N variants in test | p-value  | N variants in test | p-value  | N variants in test | p-value  | N variants in test | p-value  | N variants in test | p-value  | N variants in test | p-value  |
| TOR1AIP1 | 1   | 2                  | 3.99E-01 | 2                  | 3.99E-01 | 2                  | 3.72E-01 | 2                  | 3.72E-01 | 1                  | 6.17E-01 | 1                  | 6.17E-01 |
| RALGPS1  | 9   | 2                  | 1.07E-01 | 2                  | 1.07E-01 | 2                  | 3.72E-01 | 2                  | 3.72E-01 |                    |          |                    |          |
| GZMM     | 19  | 3                  | 1.00E+00 | 3                  | 1.00E+00 | 3                  | 3.72E-01 | 3                  | 3.72E-01 | 2                  | 4.86E-01 | 2                  | 4.86E-01 |
| ZFP57    | 6   |                    |          | 1                  | 2.14E-01 |                    |          | 1                  | 3.72E-01 |                    |          | 1                  | 8.32E-01 |
| MAD1L1   | 7   | 3                  | 4.66E-02 | 3                  | 4.66E-02 | 2                  | 1.00E+00 | 2                  | 1.00E+00 | 3                  | 3.72E-01 | 3                  | 3.72E-01 |
| NMRK1    | 9   | 3                  | 8.37E-01 | 3                  | 8.37E-01 | 2                  | 3.72E-01 | 2                  | 3.72E-01 | 2                  | 4.15E-01 | 2                  | 4.15E-01 |
| CEACAM4  | 19  | 3                  | 6.93E-02 | 3                  | 6.93E-02 | 3                  | 3.72E-01 | 3                  | 3.72E-01 |                    |          |                    |          |
| R3HDM2   | 12  | 2                  | 3.55E-01 | 2                  | 3.55E-01 | 2                  | 3.72E-01 | 2                  | 3.72E-01 | 1                  | 5.54E-01 | 1                  | 5.54E-01 |
| LRRC47   | 1   | 2                  | 3.57E-01 | 2                  | 3.57E-01 | 2                  | 3.72E-01 | 2                  | 3.72E-01 | 1                  | 6.80E-01 | 1                  | 6.80E-01 |
| NYAP1    | 7   | 3                  | 2.36E-01 | 3                  | 2.36E-01 | 3                  | 7.69E-01 | 3                  | 7.69E-01 | 3                  | 3.73E-01 | 3                  | 3.73E-01 |
| RAVER1   | 19  | 7                  | 2.72E-01 | 7                  | 2.72E-01 | 6                  | 3.73E-01 | 6                  | 3.73E-01 | 1                  | 6.30E-01 | 1                  | 6.30E-01 |
| CHRNA3   | 2   | 3                  | 3.97E-01 | 3                  | 3.97E-01 | 2                  | 3.73E-01 | 2                  | 3.73E-01 | 2                  | 6.42E-01 | 2                  | 6.42E-01 |
| WRN      | 8   | 8                  | 6.64E-01 | 8                  | 6.64E-01 | 8                  | 4.92E-01 | 8                  | 4.92E-01 | 4                  | 3.73E-01 | 4                  | 3.73E-01 |
| PLPP6    | 9   | 2                  | 6.56E-01 | 2                  | 6.56E-01 | 2                  | 3.73E-01 | 2                  | 3.73E-01 | 2                  | 4.68E-01 | 2                  | 4.68E-01 |
| FGFBP3   | 10  | 1                  | 5.34E-01 | 1                  | 5.34E-01 | 1                  | 5.48E-01 | 1                  | 5.48E-01 | 1                  | 3.73E-01 | 1                  | 3.73E-01 |
| SLC17A9  | 20  | 7                  | 2.42E-01 | 7                  | 2.42E-01 | 4                  | 3.73E-01 | 4                  | 3.73E-01 | 4                  | 5.73E-01 | 4                  | 5.73E-01 |
| CYLC2    | 9   | 2                  | 4.61E-01 | 2                  | 4.61E-01 | 1                  | 3.73E-01 | 1                  | 3.73E-01 | 2                  | 4.77E-01 | 2                  | 4.77E-01 |
| TCIRG1   | 11  | 8                  | 4.70E-01 | 8                  | 4.70E-01 | 7                  | 4.98E-01 | 7                  | 4.98E-01 | 4                  | 3.73E-01 | 4                  | 3.73E-01 |
| SLC38A6  | 14  | 5                  | 1.14E-01 | 5                  | 1.14E-01 | 2                  | 7.49E-01 | 2                  | 7.49E-01 | 4                  | 3.74E-01 | 4                  | 3.74E-01 |
| P2RX2    | 12  | 2                  | 4.04E-01 | 2                  | 4.04E-01 | 2                  | 3.74E-01 | 2                  | 3.74E-01 | 1                  | 6.64E-01 | 1                  | 6.64E-01 |
| OR51M1   | 11  | 3                  | 3.09E-01 | 3                  | 3.09E-01 | 2                  | 3.74E-01 | 2                  | 3.74E-01 | 3                  | 4.09E-01 | 3                  | 4.09E-01 |
| ST7L     | 1   | 4                  | 7.07E-01 | 4                  | 7.07E-01 | 4                  | 3.74E-01 | 4                  | 3.74E-01 | 4                  | 4.42E-01 | 4                  | 4.42E-01 |
| DUS2     | 16  | 6                  | 6.67E-01 | 6                  | 6.67E-01 | 6                  | 3.74E-01 | 6                  | 3.74E-01 | 1                  | 4.44E-01 | 1                  | 4.44E-01 |
| BIN2     | 12  | 3                  | 4.23E-01 | 3                  | 4.23E-01 | 2                  | 6.17E-01 | 2                  | 6.17E-01 | 2                  | 3.74E-01 | 2                  | 3.74E-01 |
| BRAT1    | 7   | 6                  | 6.79E-01 | 6                  | 6.79E-01 | 5                  | 3.74E-01 | 5                  | 3.74E-01 | 4                  | 4.14E-01 | 4                  | 4.14E-01 |
| KCNK5    | 6   | 3                  | 1.46E-01 | 3                  | 1.46E-01 | 2                  | 3.74E-01 | 2                  | 3.74E-01 | 3                  | 1.00E+00 | 3                  | 1.00E+00 |
| ABCB5    | 7   | 12                 | 1.00E+00 | 14                 | 1.00E+00 | 9                  | 3.74E-01 | 11                 | 3.76E-01 | 8                  | 7.15E-01 | 10                 | 7.20E-01 |
| HECW1    | 7   | 9                  | 4.41E-01 | 9                  | 4.41E-01 | 7                  | 3.74E-01 | 7                  | 3.74E-01 | 5                  | 4.01E-01 | 5                  | 4.01E-01 |
| SOD3     | 4   | 2                  | 5.91E-01 | 2                  | 5.91E-01 | 1                  | 3.74E-01 | 1                  | 3.74E-01 | 2                  | 6.61E-01 | 2                  | 6.61E-01 |
| MAP3K9   | 14  | 4                  | 2.46E-02 | 4                  | 2.46E-02 | 3                  | 7.72E-01 | 3                  | 7.72E-01 | 2                  | 3.75E-01 | 2                  | 3.75E-01 |
| SYNPR    | 3   | 1                  | 8.86E-01 | 1                  | 8.86E-01 | 1                  | 1.00E+00 | 1                  | 1.00E+00 | 1                  | 3.75E-01 | 1                  | 3.75E-01 |
| FBXO17   | 19  | 2                  | 4.28E-01 | 2                  | 4.28E-01 | 2                  | 1.00E+00 | 2                  | 1.00E+00 | 2                  | 3.75E-01 | 2                  | 3.75E-01 |
| TIMELESS | 12  | 6                  | 3.99E-01 | 7                  | 3.99E-01 | 3                  | 3.75E-01 | 4                  | 3.75E-01 | 4                  | 8.29E-01 | 5                  | 8.29E-01 |
| SEMA4B   | 15  | 5                  | 2.30E-01 | 5                  | 2.30E-01 | 3                  | 6.56E-01 | 3                  | 6.56E-01 | 3                  | 3.75E-01 | 3                  | 3.75E-01 |
| CD101    | 1   | 10                 | 1.87E-01 | 10                 | 1.87E-01 | 4                  | 3.77E-01 | 4                  | 3.77E-01 | 9                  | 3.75E-01 | 9                  | 3.75E-01 |
| ANGPT1   | 8   | 1                  | 5.26E-01 | 1                  | 5.26E-01 | 1                  | 3.75E-01 | 1                  | 3.75E-01 | 1                  | 1.00E+00 | 1                  | 1.00E+00 |
| NLRP5    | 19  | 6                  | 4.19E-01 | 7                  | 3.87E-01 | 5                  | 3.75E-01 | 6                  | 3.78E-01 | 4                  | 1.00E+00 | 5                  | 1.00E+00 |
| CASKIN1  | 16  | 5                  | 3.74E-01 | 5                  | 3.74E-01 | 5                  | 1.00E+00 | 5                  | 1.00E+00 | 2                  | 3.75E-01 | 2                  | 3.75E-01 |
| COCH     | 14  | 1                  | 8.75E-01 | 1                  | 8.75E-01 | 1                  | 3.75E-01 | 1                  | 3.75E-01 | 1                  | 4.61E-01 | 1                  | 4.61E-01 |
| VEPH1    | 3   | 5                  | 6.68E-01 | 5                  | 6.68E-01 | 4                  | 3.75E-01 | 4                  | 3.75E-01 | 2                  | 3.86E-01 | 2                  | 3.86E-01 |
| CCDC125  | 5   | 6                  | 1.92E-01 | 6                  | 1.92E-01 | 3                  | 3.75E-01 | 3                  | 3.75E-01 | 5                  | 8.79E-01 | 5                  | 8.79E-01 |
| ABCA5    | 17  | 5                  | 2.58E-01 | 5                  | 2.58E-01 | 5                  | 3.76E-01 | 5                  | 3.76E-01 | 1                  | 6.23E-01 | 1                  | 6.23E-01 |
| STAR     | 8   | 1                  | 7.10E-02 | 1                  | 7.10E-02 | 1                  | 4.73E-01 | 1                  | 4.73E-01 | 1                  | 3.76E-01 | 1                  | 3.76E-01 |
| SRCAP    | 16  | 10                 | 6.04E-01 | 10                 | 6.04E-01 | 8                  | 3.76E-01 | 8                  | 3.76E-01 | 3                  | 3.76E-01 | 3                  | 3.76E-01 |
| UNC80    | 2   | 7                  | 4.29E-01 | 7                  | 4.29E-01 | 4                  | 3.76E-01 | 4                  | 3.76E-01 | 4                  | 5.19E-01 | 4                  | 5.19E-01 |
| DCST2    | 1   | 10                 | 1.77E-01 | 10                 | 1.77E-01 | 10                 | 6.22E-01 | 10                 | 6.22E-01 | 3                  | 3.76E-01 | 3                  | 3.76E-01 |
| TNRC6C   | 17  | 5                  | 1.31E-01 | 5                  | 1.31E-01 | 5                  | 3.76E-01 | 5                  | 3.76E-01 | 3                  | 3.98E-01 | 3                  | 3.98E-01 |
| C21orf59 | 21  | 1                  | 7.19E-01 | 1                  | 7.19E-01 | 1                  | 1.00E+00 | 1                  | 1.00E+00 | 1                  | 3.76E-01 | 1                  | 3.76E-01 |

| SetID   | Chr | ADEH- vs NA        |          |                    |          | ADEH+ vs ADEH-     |          |                    |          | ADEH+ vs NA        |          |                    |          |
|---------|-----|--------------------|----------|--------------------|----------|--------------------|----------|--------------------|----------|--------------------|----------|--------------------|----------|
|         |     | rarenovel          |          | all                |          | rarenovel          |          | all                |          | rarenovel          |          | all                |          |
|         |     | N variants in test | p-value  | N variants in test | p-value  | N variants in test | p-value  | N variants in test | p-value  | N variants in test | p-value  | N variants in test | p-value  |
| CATIP   | 2   | 1                  | 1.19E-01 | 1                  | 1.19E-01 | 1                  | 3.76E-01 | 1                  | 3.76E-01 |                    |          |                    |          |
| GALNTL5 | 7   | 1                  | 7.91E-01 | 2                  | 1.00E+00 | 1                  | 4.35E-01 | 2                  | 3.76E-01 | 1                  | 6.04E-01 | 2                  | 6.78E-01 |
| ALDH7A1 | 5   | 4                  | 7.73E-01 | 4                  | 7.73E-01 | 4                  | 3.77E-01 | 4                  | 3.77E-01 | 2                  | 5.75E-01 | 2                  | 5.75E-01 |
| SLIT3   | 5   | 9                  | 4.91E-01 | 9                  | 4.91E-01 | 8                  | 3.77E-01 | 8                  | 3.77E-01 | 2                  | 6.13E-01 | 2                  | 6.13E-01 |
| MUC16   | 19  | 47                 | 4.65E-01 | 52                 | 4.36E-01 | 37                 | 3.77E-01 | 42                 | 3.83E-01 | 28                 | 8.65E-01 | 33                 | 9.02E-01 |
| PRSS57  | 19  | 1                  | 8.83E-01 | 1                  | 8.83E-01 | 1                  | 1.00E+00 | 1                  | 1.00E+00 | 1                  | 3.77E-01 | 1                  | 3.77E-01 |
| DUOXA2  | 15  | 1                  | 4.09E-01 | 1                  | 4.09E-01 | 1                  | 3.77E-01 | 1                  | 3.77E-01 |                    |          |                    |          |
| IRF2BPL | 14  | 1                  | 1.57E-01 | 1                  | 1.57E-01 | 1                  | 3.77E-01 | 1                  | 3.77E-01 |                    |          |                    |          |
| QRSL1   | 6   | 2                  | 1.63E-01 | 2                  | 1.63E-01 | 1                  | 3.78E-01 | 1                  | 3.78E-01 | 1                  | 6.18E-01 | 1                  | 6.18E-01 |
| FBXO39  | 17  | 3                  | 6.29E-01 | 3                  | 6.29E-01 | 3                  | 3.78E-01 | 3                  | 3.78E-01 | 1                  | 4.59E-01 | 1                  | 4.59E-01 |
| STYXL1  | 7   | 2                  | 7.93E-01 | 2                  | 7.93E-01 | 2                  | 1.00E+00 | 2                  | 1.00E+00 | 1                  | 3.78E-01 | 1                  | 3.78E-01 |
| SVIL    | 10  | 6                  | 6.79E-01 | 6                  | 6.79E-01 | 4                  | 4.01E-01 | 4                  | 4.01E-01 | 3                  | 3.78E-01 | 3                  | 3.78E-01 |
| PRX     | 19  | 7                  | 7.74E-01 | 7                  | 7.74E-01 | 6                  | 3.78E-01 | 6                  | 3.78E-01 | 2                  | 6.26E-01 | 2                  | 6.26E-01 |
| PKD1    | 16  | 5                  | 6.07E-01 | 5                  | 6.07E-01 | 3                  | 3.78E-01 | 3                  | 3.78E-01 | 3                  | 5.27E-01 | 3                  | 5.27E-01 |
| RHBDF2  | 17  | 4                  | 3.70E-01 | 4                  | 3.70E-01 | 3                  | 3.78E-01 | 3                  | 3.78E-01 | 1                  | 6.36E-01 | 1                  | 6.36E-01 |
| GPALPP1 | 13  | 2                  | 3.26E-01 | 2                  | 3.26E-01 | 2                  | 3.78E-01 | 2                  | 3.78E-01 | 1                  | 1.00E+00 | 1                  | 1.00E+00 |
| NDST4   | 4   | 4                  | 6.99E-01 | 4                  | 6.99E-01 | 3                  | 3.78E-01 | 3                  | 3.78E-01 | 2                  | 6.36E-01 | 2                  | 6.36E-01 |
| PYGB    | 20  | 6                  | 4.51E-01 | 7                  | 4.37E-01 | 4                  | 3.78E-01 | 5                  | 3.79E-01 | 4                  | 7.44E-01 | 5                  | 7.45E-01 |
| PSMB2   | 1   | 2                  | 2.13E-01 | 2                  | 2.13E-01 | 1                  | 5.29E-01 | 1                  | 5.29E-01 | 2                  | 3.79E-01 | 2                  | 3.79E-01 |
| PROKR2  | 20  | 4                  | 4.72E-01 | 4                  | 4.72E-01 | 3                  | 3.79E-01 | 3                  | 3.79E-01 | 3                  | 5.61E-01 | 3                  | 5.61E-01 |
| RELL2   | 5   | 3                  | 3.74E-01 | 3                  | 3.74E-01 | 2                  | 5.56E-01 | 2                  | 5.56E-01 | 3                  | 3.79E-01 | 3                  | 3.79E-01 |
| PI4K2B  | 4   | 1                  | 2.41E-01 | 2                  | 4.77E-01 | 1                  | 1.00E+00 | 2                  | 6.04E-01 |                    |          | 1                  | 3.79E-01 |
| RPS6KB2 | 11  | 3                  | 2.97E-01 | 3                  | 2.97E-01 | 2                  | 3.79E-01 | 2                  | 3.79E-01 | 1                  | 5.28E-01 | 1                  | 5.28E-01 |
| ARMC4   | 10  | 6                  | 1.70E-01 | 6                  | 1.70E-01 | 3                  | 3.79E-01 | 3                  | 3.79E-01 | 4                  | 4.18E-01 | 4                  | 4.18E-01 |
| CARD6   | 5   | 4                  | 7.96E-02 | 5                  | 1.28E-01 | 1                  | 5.23E-01 | 2                  | 5.38E-01 | 3                  | 3.79E-01 | 4                  | 7.84E-01 |
| OR5P2   | 11  | 4                  | 4.00E-01 | 4                  | 4.00E-01 | 3                  | 4.56E-01 | 3                  | 4.56E-01 | 4                  | 3.80E-01 | 4                  | 3.80E-01 |
| LTBP1   | 2   | 3                  | 4.80E-01 | 3                  | 4.80E-01 | 4                  | 5.56E-01 | 4                  | 5.56E-01 | 3                  | 3.80E-01 | 3                  | 3.80E-01 |
| MTNR1B  | 11  | 4                  | 2.78E-01 | 4                  | 2.78E-01 | 3                  | 5.64E-01 | 3                  | 5.64E-01 | 2                  | 3.80E-01 | 2                  | 3.80E-01 |
| ZNF862  | 7   | 5                  | 4.76E-02 | 5                  | 4.76E-02 | 3                  | 5.69E-01 | 3                  | 5.69E-01 | 3                  | 3.80E-01 | 3                  | 3.80E-01 |
| SLC6A13 | 12  | 10                 | 5.15E-01 | 10                 | 5.15E-01 | 7                  | 3.80E-01 | 7                  | 3.80E-01 | 4                  | 4.11E-01 | 4                  | 4.11E-01 |
| PRKCH   | 14  | 2                  | 8.13E-02 | 2                  | 8.13E-02 | 1                  | 4.61E-01 | 1                  | 4.61E-01 | 2                  | 3.80E-01 | 2                  | 3.80E-01 |
| ACACB   | 12  | 12                 | 4.81E-01 | 12                 | 4.81E-01 | 10                 | 3.80E-01 | 10                 | 3.80E-01 | 5                  | 4.46E-01 | 5                  | 4.46E-01 |
| SH3TC1  | 4   | 13                 | 6.47E-02 | 13                 | 6.47E-02 | 10                 | 3.80E-01 | 10                 | 3.80E-01 | 10                 | 1.00E+00 | 10                 | 1.00E+00 |
| HDLBP   | 2   | 1                  | 5.48E-01 | 1                  | 5.48E-01 | 1                  | 3.81E-01 | 1                  | 3.81E-01 | 1                  | 6.35E-01 | 1                  | 6.35E-01 |
| EEFSEC  | 3   | 3                  | 7.07E-02 | 3                  | 7.07E-02 | 3                  | 3.81E-01 | 3                  | 3.81E-01 |                    |          |                    |          |
| PDE5A   | 4   | 2                  | 1.02E-01 | 2                  | 1.02E-01 | 2                  | 3.81E-01 | 2                  | 3.81E-01 |                    |          |                    |          |
| OR2C1   | 16  | 3                  | 6.30E-01 | 3                  | 6.30E-01 | 3                  | 3.81E-01 | 3                  | 3.81E-01 | 3                  | 4.31E-01 | 3                  | 4.31E-01 |
| COL2A1  | 12  |                    |          | 1                  | 4.05E-01 |                    |          | 1                  | 3.81E-01 |                    |          | 1                  | 6.32E-01 |
| INTS3   | 1   | 3                  | 1.12E-01 | 3                  | 1.12E-01 | 3                  | 3.81E-01 | 3                  | 3.81E-01 |                    |          |                    |          |
| SIRT5   | 6   | 2                  | 1.00E+00 | 3                  | 1.00E+00 | 2                  | 6.19E-01 | 3                  | 3.81E-01 | 1                  | 6.41E-01 | 2                  | 3.84E-01 |
| FAM214A | 15  | 4                  | 8.34E-01 | 4                  | 8.34E-01 | 4                  | 3.81E-01 | 4                  | 3.81E-01 | 3                  | 5.45E-01 | 3                  | 5.45E-01 |
| TSGA10  | 2   | 3                  | 6.14E-01 | 3                  | 6.14E-01 | 3                  | 3.81E-01 | 3                  | 3.81E-01 | 1                  | 4.46E-01 | 1                  | 4.46E-01 |
| KIF1C   | 17  | 4                  | 5.13E-01 | 4                  | 5.13E-01 | 2                  | 4.08E-01 | 2                  | 4.08E-01 | 4                  | 3.82E-01 | 4                  | 3.82E-01 |
| GAL3ST2 | 2   | 5                  | 1.00E+00 | 5                  | 1.00E+00 | 5                  | 3.82E-01 | 5                  | 3.82E-01 | 5                  | 6.09E-01 | 5                  | 6.09E-01 |
| OR51G2  | 11  | 6                  | 4.10E-01 | 6                  | 4.10E-01 | 5                  | 4.75E-01 | 5                  | 4.75E-01 | 3                  | 3.82E-01 | 3                  | 3.82E-01 |
| NLRP13  | 19  | 5                  | 6.54E-01 | 5                  | 6.54E-01 | 5                  | 3.82E-01 | 5                  | 3.82E-01 | 1                  | 4.48E-01 | 1                  | 4.48E-01 |
| PCDHA5  | 5   | 5                  | 5.71E-01 | 5                  | 5.71E-01 | 3                  | 4.89E-01 | 3                  | 4.89E-01 | 3                  | 3.82E-01 | 3                  | 3.82E-01 |
| ZNRF4   | 19  | 3                  | 1.00E+00 | 3                  | 1.00E+00 | 3                  | 3.82E-01 | 3                  | 3.82E-01 | 1                  | 4.60E-01 | 1                  | 4.60E-01 |

| SetID        | Chr | ADEH- vs NA        |          |                    |          | ADEH+ vs ADEH-     |          |                    |          | ADEH+ vs NA        |          |                    |          |
|--------------|-----|--------------------|----------|--------------------|----------|--------------------|----------|--------------------|----------|--------------------|----------|--------------------|----------|
|              |     | rarenovel          |          | all                |          | rarenovel          |          | all                |          | rarenovel          |          | all                |          |
|              |     | N variants in test | p-value  | N variants in test | p-value  | N variants in test | p-value  | N variants in test | p-value  | N variants in test | p-value  | N variants in test | p-value  |
| ANKRD39      | 2   | 2                  | 6.88E-01 | 2                  | 6.88E-01 | 1                  | 3.82E-01 | 1                  | 3.82E-01 | 2                  | 4.90E-01 | 2                  | 4.90E-01 |
| MZF1         | 19  | 2                  | 1.22E-01 | 2                  | 1.22E-01 | 2                  | 3.82E-01 | 2                  | 3.82E-01 |                    |          |                    |          |
| STOML3       | 13  | 1                  | 5.93E-01 | 1                  | 5.93E-01 | 1                  | 3.82E-01 | 1                  | 3.82E-01 | 1                  | 6.25E-01 | 1                  | 6.25E-01 |
| INMT         | 7   | 2                  | 6.24E-01 | 2                  | 6.24E-01 | 2                  | 5.22E-01 | 2                  | 5.22E-01 | 2                  | 3.82E-01 | 2                  | 3.82E-01 |
| NEU2         | 2   | 1                  | 1.00E+00 | 1                  | 1.00E+00 | 1                  | 3.82E-01 | 1                  | 3.82E-01 | 1                  | 4.51E-01 | 1                  | 4.51E-01 |
| PALMD        | 1   | 5                  | 4.60E-01 | 5                  | 4.60E-01 | 3                  | 5.26E-01 | 3                  | 5.26E-01 | 3                  | 3.83E-01 | 3                  | 3.83E-01 |
| AMER2        | 13  | 2                  | 2.88E-01 | 2                  | 2.88E-01 | 2                  | 3.83E-01 | 2                  | 3.83E-01 | 1                  | 1.00E+00 | 1                  | 1.00E+00 |
| SPNS1        | 16  | 2                  | 7.25E-01 | 2                  | 7.25E-01 | 2                  | 3.92E-01 | 2                  | 3.92E-01 | 2                  | 3.83E-01 | 2                  | 3.83E-01 |
| OR5D18       | 11  | 3                  | 6.26E-02 | 4                  | 9.21E-02 | 2                  | 1.00E+00 | 3                  | 1.00E+00 | 3                  | 3.83E-01 | 4                  | 5.54E-01 |
| FAT4         | 4   | 19                 | 8.71E-01 | 20                 | 8.71E-01 | 15                 | 3.83E-01 | 16                 | 3.84E-01 | 8                  | 4.10E-01 | 9                  | 4.11E-01 |
| OR52I2       | 11  |                    |          | 1                  | 6.46E-01 |                    |          | 1                  | 4.45E-01 |                    |          | 1                  | 3.83E-01 |
| SAMSN1       | 21  | 1                  | 5.03E-01 | 1                  | 5.03E-01 | 1                  | 1.00E+00 | 1                  | 1.00E+00 | 1                  | 3.83E-01 | 1                  | 3.83E-01 |
| SGCG         | 13  | 3                  | 7.72E-03 | 4                  | 5.30E-03 |                    |          | 1                  | 5.26E-01 | 3                  | 4.67E-01 | 4                  | 3.83E-01 |
| ELOVL5       | 6   | 5                  | 7.64E-01 | 5                  | 7.64E-01 | 4                  | 4.65E-01 | 4                  | 4.65E-01 | 3                  | 3.83E-01 | 3                  | 3.83E-01 |
| TEX15        | 8   | 7                  | 3.70E-01 | 7                  | 3.70E-01 | 8                  | 4.28E-01 | 8                  | 4.28E-01 | 3                  | 3.84E-01 | 3                  | 3.84E-01 |
| TMEM217      | 6   | 1                  | 2.56E-01 | 1                  | 2.56E-01 | 1                  | 1.00E+00 | 1                  | 1.00E+00 | 1                  | 3.84E-01 | 1                  | 3.84E-01 |
| GJA8         | 1   | 1                  | 5.99E-01 | 1                  | 5.99E-01 | 1                  | 3.84E-01 | 1                  | 3.84E-01 | 1                  | 6.41E-01 | 1                  | 6.41E-01 |
| EFHC1        | 6   | 7                  | 3.17E-01 | 7                  | 3.17E-01 | 4                  | 1.00E+00 | 4                  | 1.00E+00 | 4                  | 3.84E-01 | 4                  | 3.84E-01 |
| RNASL        | 1   | 6                  | 7.21E-01 | 7                  | 7.21E-01 | 4                  | 3.84E-01 | 5                  | 3.84E-01 | 5                  | 4.40E-01 | 6                  | 4.40E-01 |
| AGT          | 1   | 4                  | 3.32E-02 | 5                  | 4.95E-02 | 2                  | 6.45E-01 | 3                  | 7.16E-01 | 3                  | 3.84E-01 | 4                  | 6.94E-01 |
| MOV10L1      | 22  | 5                  | 5.28E-01 | 6                  | 5.28E-01 | 4                  | 3.85E-01 | 5                  | 3.84E-01 | 2                  | 4.99E-01 | 3                  | 5.09E-01 |
| JMJD7-PLA2G4 | 15  | 11                 | 2.73E-01 | 11                 | 2.73E-01 | 7                  | 3.84E-01 | 7                  | 3.84E-01 | 5                  | 7.54E-01 | 5                  | 7.54E-01 |
| CSF1R        | 5   | 3                  | 4.27E-01 | 3                  | 4.27E-01 | 2                  | 5.21E-01 | 2                  | 5.21E-01 | 2                  | 3.85E-01 | 2                  | 3.85E-01 |
| QSOX2        | 9   | 2                  | 8.08E-01 | 2                  | 8.08E-01 | 2                  | 5.82E-01 | 2                  | 5.82E-01 | 2                  | 3.85E-01 | 2                  | 3.85E-01 |
| SLC15A1      | 13  | 4                  | 5.76E-01 | 4                  | 5.76E-01 | 3                  | 4.68E-01 | 3                  | 4.68E-01 | 3                  | 3.85E-01 | 3                  | 3.85E-01 |
| TFF3         | 21  | 1                  | 1.56E-01 | 1                  | 1.56E-01 | 1                  | 3.85E-01 | 1                  | 3.85E-01 |                    |          |                    |          |
| KRTAP10-11   | 21  | 1                  | 6.32E-02 | 2                  | 6.32E-02 | 1                  | 1.00E+00 | 2                  | 1.00E+00 | 1                  | 3.87E-01 | 2                  | 3.85E-01 |
| MICAL2       | 11  | 3                  | 3.83E-01 | 3                  | 3.83E-01 | 4                  | 3.85E-01 | 4                  | 3.85E-01 | 2                  | 5.73E-01 | 2                  | 5.73E-01 |
| FAM234A      | 16  | 5                  | 3.11E-01 | 5                  | 3.11E-01 | 2                  | 3.85E-01 | 2                  | 3.85E-01 | 4                  | 4.28E-01 | 4                  | 4.28E-01 |
| CENPM        | 22  |                    |          | 1                  | 3.54E-01 |                    |          | 1                  | 3.85E-01 |                    |          | 1                  | 7.65E-01 |
| GPNMB        | 7   | 4                  | 6.67E-01 | 4                  | 6.67E-01 | 4                  | 3.85E-01 | 4                  | 3.85E-01 | 1                  | 4.62E-01 | 1                  | 4.62E-01 |
| ARMC6        | 19  | 1                  | 4.97E-02 | 1                  | 4.97E-02 | 1                  | 1.00E+00 | 1                  | 1.00E+00 | 1                  | 3.85E-01 | 1                  | 3.85E-01 |
| MED1         | 17  | 3                  | 4.41E-01 | 3                  | 4.41E-01 | 2                  | 4.96E-01 | 2                  | 4.96E-01 | 2                  | 3.86E-01 | 2                  | 3.86E-01 |
| NMU          | 4   | 1                  | 7.50E-01 | 2                  | 1.00E+00 | 1                  | 4.84E-01 | 2                  | 4.97E-01 |                    |          | 1                  | 3.86E-01 |
| OR6C2        | 12  | 3                  | 6.58E-01 | 4                  | 7.14E-01 | 3                  | 3.86E-01 | 4                  | 4.71E-01 | 1                  | 4.55E-01 | 2                  | 4.62E-01 |
| ZNF592       | 15  | 2                  | 1.00E+00 | 2                  | 1.00E+00 | 2                  | 3.86E-01 | 2                  | 3.86E-01 | 1                  | 5.76E-01 | 1                  | 5.76E-01 |
| SPNS3        | 17  | 4                  | 4.71E-01 | 5                  | 4.89E-01 | 4                  | 4.60E-01 | 5                  | 1.00E+00 | 2                  | 3.86E-01 | 3                  | 4.63E-01 |
| ANKDD1B      | 5   | 2                  | 1.07E-02 | 3                  | 1.07E-02 |                    |          | 1                  | 3.86E-01 | 2                  | 6.32E-01 | 3                  | 6.33E-01 |
| LUM          | 12  | 1                  | 1.00E+00 | 1                  | 1.00E+00 | 1                  | 3.87E-01 | 1                  | 3.87E-01 | 1                  | 4.54E-01 | 1                  | 4.54E-01 |
| COL10A1      | 6   | 3                  | 5.88E-01 | 4                  | 5.49E-01 | 3                  | 4.92E-01 | 4                  | 3.87E-01 | 1                  | 6.07E-01 | 2                  | 5.97E-01 |
| TSR1         | 17  | 6                  | 8.60E-01 | 6                  | 8.60E-01 | 6                  | 3.87E-01 | 6                  | 3.87E-01 | 2                  | 4.11E-01 | 2                  | 4.11E-01 |
| LRRD1        | 7   | 5                  | 1.07E-01 | 5                  | 1.07E-01 | 4                  | 3.87E-01 | 4                  | 3.87E-01 | 1                  | 4.53E-01 | 1                  | 4.53E-01 |
| CKM          | 19  | 4                  | 7.77E-01 | 4                  | 7.77E-01 | 3                  | 3.87E-01 | 3                  | 3.87E-01 | 2                  | 6.40E-01 | 2                  | 6.40E-01 |
| APC          | 5   | 7                  | 4.64E-01 | 7                  | 4.64E-01 | 4                  | 6.09E-01 | 4                  | 6.09E-01 | 4                  | 3.87E-01 | 4                  | 3.87E-01 |
| DAGLB        | 7   | 6                  | 5.87E-01 | 7                  | 6.07E-01 | 5                  | 7.08E-01 | 6                  | 1.00E+00 | 4                  | 3.87E-01 | 5                  | 4.42E-01 |
| ITGA1        | 5   | 5                  | 4.13E-01 | 5                  | 4.13E-01 | 5                  | 3.88E-01 | 5                  | 3.88E-01 | 1                  | 6.59E-01 | 1                  | 6.59E-01 |
| PHC1         | 12  | 2                  | 1.95E-01 | 3                  | 1.78E-01 | 2                  | 4.30E-01 | 3                  | 3.88E-01 | 1                  | 1.00E+00 | 2                  | 1.00E+00 |
| LRR8E        | 19  | 6                  | 5.50E-01 | 6                  | 5.50E-01 | 5                  | 3.88E-01 | 5                  | 3.88E-01 | 2                  | 6.46E-01 | 2                  | 6.46E-01 |



| SetID     | Chr | ADEH- vs NA        |          |                    |          | ADEH+ vs ADEH-     |          |                    |          | ADEH+ vs NA        |          |                    |          |
|-----------|-----|--------------------|----------|--------------------|----------|--------------------|----------|--------------------|----------|--------------------|----------|--------------------|----------|
|           |     | rarenovel          |          | all                |          | rarenovel          |          | all                |          | rarenovel          |          | all                |          |
|           |     | N variants in test | p-value  | N variants in test | p-value  | N variants in test | p-value  | N variants in test | p-value  | N variants in test | p-value  | N variants in test | p-value  |
| COBL      | 7   | 7                  | 1.09E-01 | 8                  | 8.57E-02 | 5                  | 4.94E-01 | 6                  | 1.00E+00 | 2                  | 4.80E-01 | 3                  | 3.88E-01 |
| GSG1      | 12  | 6                  | 5.37E-01 | 6                  | 5.37E-01 | 4                  | 3.89E-01 | 4                  | 3.89E-01 | 3                  | 5.73E-01 | 3                  | 5.73E-01 |
| TIAM2     | 6   | 5                  | 6.83E-01 | 7                  | 6.83E-01 | 3                  | 3.89E-01 | 5                  | 3.90E-01 | 3                  | 8.56E-01 | 5                  | 8.63E-01 |
| KIF2A     | 5   | 1                  | 4.00E-01 | 1                  | 4.00E-01 | 1                  | 3.89E-01 | 1                  | 3.89E-01 |                    |          |                    |          |
| NUP160    | 11  | 4                  | 8.95E-01 | 4                  | 8.95E-01 | 3                  | 4.07E-01 | 3                  | 4.07E-01 | 2                  | 3.89E-01 | 2                  | 3.89E-01 |
| GRIA4     | 11  | 1                  | 4.06E-01 | 1                  | 4.06E-01 | 1                  | 3.89E-01 | 1                  | 3.89E-01 |                    |          |                    |          |
| NOA1      | 4   | 2                  | 3.73E-01 | 2                  | 3.73E-01 | 2                  | 3.89E-01 | 2                  | 3.89E-01 | 1                  | 6.69E-01 | 1                  | 6.69E-01 |
| SLC22A10  | 11  | 5                  | 4.11E-01 | 7                  | 4.11E-01 | 3                  | 3.89E-01 | 5                  | 3.89E-01 | 4                  | 6.09E-01 | 6                  | 6.09E-01 |
| KRT7      | 12  | 4                  | 2.51E-01 | 4                  | 2.51E-01 | 4                  | 3.89E-01 | 4                  | 3.89E-01 | 1                  | 6.35E-01 | 1                  | 6.35E-01 |
| GSE1      | 16  | 9                  | 7.27E-01 | 9                  | 7.27E-01 | 6                  | 3.95E-01 | 6                  | 3.95E-01 | 4                  | 3.89E-01 | 4                  | 3.89E-01 |
| AGTR1     | 3   | 2                  | 7.98E-01 | 2                  | 7.98E-01 | 2                  | 3.89E-01 | 2                  | 3.89E-01 | 1                  | 4.39E-01 | 1                  | 4.39E-01 |
| OR52E8    | 11  |                    |          | 1                  | 3.32E-01 |                    |          | 1                  | 6.22E-01 |                    |          | 1                  | 3.89E-01 |
| RTN3      | 11  | 5                  | 1.00E+00 | 5                  | 1.00E+00 | 5                  | 3.90E-01 | 5                  | 3.90E-01 | 4                  | 4.84E-01 | 4                  | 4.84E-01 |
| OR52B4    | 11  | 4                  | 4.51E-01 | 4                  | 4.51E-01 | 3                  | 1.00E+00 | 3                  | 1.00E+00 | 2                  | 3.90E-01 | 2                  | 3.90E-01 |
| NEB       | 2   | 29                 | 6.98E-02 | 30                 | 6.98E-02 | 21                 | 3.90E-01 | 22                 | 3.90E-01 | 14                 | 5.55E-01 | 15                 | 5.55E-01 |
| TGM1      | 14  | 6                  | 4.46E-01 | 6                  | 4.46E-01 | 5                  | 3.90E-01 | 5                  | 3.90E-01 | 1                  | 6.28E-01 | 1                  | 6.28E-01 |
| CFTR      | 7   | 14                 | 5.17E-01 | 14                 | 5.17E-01 | 14                 | 3.90E-01 | 14                 | 3.90E-01 | 8                  | 7.87E-01 | 8                  | 7.87E-01 |
| PYROXD2   | 10  | 4                  | 2.13E-01 | 4                  | 2.13E-01 | 2                  | 6.59E-01 | 2                  | 6.59E-01 | 3                  | 3.90E-01 | 3                  | 3.90E-01 |
| TAOK3     | 12  | 1                  | 9.33E-01 | 1                  | 9.33E-01 | 1                  | 3.90E-01 | 1                  | 3.90E-01 | 1                  | 6.30E-01 | 1                  | 6.30E-01 |
| AKNA      | 9   | 6                  | 4.24E-01 | 6                  | 4.24E-01 | 5                  | 3.90E-01 | 5                  | 3.90E-01 | 1                  | 5.67E-01 | 1                  | 5.67E-01 |
| PARS2     | 1   | 1                  | 1.50E-01 | 1                  | 1.50E-01 | 1                  | 3.90E-01 | 1                  | 3.90E-01 |                    |          |                    |          |
| PCDHGA11  | 5   | 6                  | 7.13E-01 | 6                  | 7.13E-01 | 6                  | 3.90E-01 | 6                  | 3.90E-01 | 4                  | 4.60E-01 | 4                  | 4.60E-01 |
| PFKP      | 10  | 5                  | 2.51E-01 | 5                  | 2.51E-01 | 3                  | 7.66E-01 | 3                  | 7.66E-01 | 3                  | 3.90E-01 | 3                  | 3.90E-01 |
| MAPK8IP3  | 16  | 6                  | 3.77E-01 | 6                  | 3.77E-01 | 3                  | 8.36E-01 | 3                  | 8.36E-01 | 4                  | 3.91E-01 | 4                  | 3.91E-01 |
| TTC7A     | 2   | 6                  | 5.81E-01 | 6                  | 5.81E-01 | 5                  | 3.91E-01 | 5                  | 3.91E-01 | 3                  | 5.45E-01 | 3                  | 5.45E-01 |
| NOD2      | 16  | 11                 | 3.10E-01 | 12                 | 4.38E-01 | 10                 | 5.98E-01 | 11                 | 3.91E-01 | 6                  | 6.37E-01 | 7                  | 5.14E-01 |
| WDR41     | 5   | 5                  | 2.16E-01 | 5                  | 2.16E-01 | 5                  | 4.74E-01 | 5                  | 4.74E-01 | 2                  | 3.91E-01 | 2                  | 3.91E-01 |
| KRTAP11-1 | 21  | 1                  | 1.95E-01 | 2                  | 3.70E-01 | 1                  | 5.12E-01 | 2                  | 4.80E-01 | 1                  | 4.47E-01 | 2                  | 3.91E-01 |
| MAP4K1    | 19  | 3                  | 6.41E-01 | 3                  | 6.41E-01 | 3                  | 3.92E-01 | 3                  | 3.92E-01 | 1                  | 4.50E-01 | 1                  | 4.50E-01 |
| FRYL      | 4   | 7                  | 3.95E-01 | 7                  | 3.95E-01 | 4                  | 5.91E-01 | 4                  | 5.91E-01 | 4                  | 3.92E-01 | 4                  | 3.92E-01 |
| TAF5L     | 1   | 1                  | 1.67E-01 | 1                  | 1.67E-01 | 1                  | 3.92E-01 | 1                  | 3.92E-01 |                    |          |                    |          |
| TMEM125   | 1   | 2                  | 4.79E-01 | 2                  | 4.79E-01 | 2                  | 3.92E-01 | 2                  | 3.92E-01 | 2                  | 6.26E-01 | 2                  | 6.26E-01 |
| LGALS13   | 19  | 3                  | 1.93E-01 | 3                  | 1.93E-01 | 3                  | 4.18E-01 | 3                  | 4.18E-01 | 2                  | 3.92E-01 | 2                  | 3.92E-01 |
| EIF5B     | 2   | 3                  | 3.21E-01 | 3                  | 3.21E-01 | 2                  | 1.00E+00 | 2                  | 1.00E+00 | 3                  | 3.92E-01 | 3                  | 3.92E-01 |
| IKBKAP    | 9   | 6                  | 2.89E-01 | 6                  | 2.89E-01 | 6                  | 4.27E-01 | 6                  | 4.27E-01 | 3                  | 3.92E-01 | 3                  | 3.92E-01 |
| TDRD9     | 14  | 6                  | 8.04E-01 | 6                  | 8.04E-01 | 4                  | 3.92E-01 | 4                  | 3.92E-01 | 5                  | 3.99E-01 | 5                  | 3.99E-01 |
| TMEM132C  | 12  | 8                  | 3.10E-01 | 8                  | 3.10E-01 | 5                  | 3.93E-01 | 5                  | 3.93E-01 | 6                  | 7.03E-01 | 6                  | 7.03E-01 |
| USF3      | 3   | 7                  | 8.76E-01 | 7                  | 8.76E-01 | 5                  | 3.93E-01 | 5                  | 3.93E-01 | 3                  | 4.04E-01 | 3                  | 4.04E-01 |
| KIAA1211  | 4   | 4                  | 1.64E-01 | 4                  | 1.64E-01 | 3                  | 1.00E+00 | 3                  | 1.00E+00 | 3                  | 3.93E-01 | 3                  | 3.93E-01 |
| CNKSR1    | 1   | 6                  | 3.33E-01 | 6                  | 3.33E-01 | 5                  | 3.93E-01 | 5                  | 3.93E-01 | 1                  | 6.00E-01 | 1                  | 6.00E-01 |
| KRT37     | 17  | 1                  | 7.44E-01 | 2                  | 7.24E-01 | 1                  | 4.62E-01 | 2                  | 3.93E-01 |                    |          | 1                  | 4.39E-01 |
| PSMD6     | 3   | 1                  | 1.54E-01 | 1                  | 1.54E-01 | 1                  | 3.93E-01 | 1                  | 3.93E-01 |                    |          |                    |          |
| ITIH4     | 3   | 6                  | 6.97E-01 | 6                  | 6.97E-01 | 6                  | 3.93E-01 | 6                  | 3.93E-01 | 2                  | 6.49E-01 | 2                  | 6.49E-01 |
| KIAA0513  | 16  | 2                  | 1.00E+00 | 2                  | 1.00E+00 | 2                  | 4.93E-01 | 2                  | 4.93E-01 | 1                  | 3.93E-01 | 1                  | 3.93E-01 |
| BCL9      | 1   | 5                  | 9.17E-01 | 5                  | 9.17E-01 | 4                  | 3.93E-01 | 4                  | 3.93E-01 | 3                  | 4.95E-01 | 3                  | 4.95E-01 |
| RIN2      | 20  | 6                  | 7.57E-01 | 6                  | 7.57E-01 | 5                  | 3.93E-01 | 5                  | 3.93E-01 | 3                  | 4.14E-01 | 3                  | 4.14E-01 |
| DROSHA    | 5   | 2                  | 3.47E-01 | 2                  | 3.47E-01 | 1                  | 3.94E-01 | 1                  | 3.94E-01 | 1                  | 6.41E-01 | 1                  | 6.41E-01 |
| NFATC4    | 14  | 3                  | 4.29E-01 | 3                  | 4.29E-01 | 2                  | 5.27E-01 | 2                  | 5.27E-01 | 2                  | 3.94E-01 | 2                  | 3.94E-01 |

| SetID    | Chr | ADEH- vs NA        |          |                    |          | ADEH+ vs ADEH-     |          |                    |          | ADEH+ vs NA        |          |                    |          |
|----------|-----|--------------------|----------|--------------------|----------|--------------------|----------|--------------------|----------|--------------------|----------|--------------------|----------|
|          |     | rarenovel          |          | all                |          | rarenovel          |          | all                |          | rarenovel          |          | all                |          |
|          |     | N variants in test | p-value  | N variants in test | p-value  | N variants in test | p-value  | N variants in test | p-value  | N variants in test | p-value  | N variants in test | p-value  |
| CHAT     | 10  | 2                  | 6.27E-02 | 3                  | 3.35E-02 | 2                  | 1.00E+00 | 3                  | 3.94E-01 | 1                  | 1.00E+00 | 2                  | 1.00E+00 |
| FIBIN    | 11  | 1                  | 9.58E-01 | 1                  | 9.58E-01 | 1                  | 3.94E-01 | 1                  | 3.94E-01 | 1                  | 4.52E-01 | 1                  | 4.52E-01 |
| NEDD9    | 6   | 4                  | 2.33E-01 | 4                  | 2.33E-01 | 5                  | 4.41E-01 | 5                  | 4.41E-01 | 3                  | 3.94E-01 | 3                  | 3.94E-01 |
| ZKSCAN3  | 6   | 1                  | 1.58E-01 | 1                  | 1.58E-01 | 1                  | 3.94E-01 | 1                  | 3.94E-01 |                    |          |                    |          |
| SLA2     | 20  | 1                  | 8.86E-01 | 1                  | 8.86E-01 | 1                  | 3.94E-01 | 1                  | 3.94E-01 | 1                  | 6.36E-01 | 1                  | 6.36E-01 |
| ZFYVE9   | 1   | 4                  | 3.26E-01 | 4                  | 3.26E-01 | 4                  | 3.94E-01 | 4                  | 3.94E-01 | 1                  | 6.17E-01 | 1                  | 6.17E-01 |
| DCHS1    | 11  | 10                 | 5.75E-01 | 10                 | 5.75E-01 | 7                  | 3.94E-01 | 7                  | 3.94E-01 | 3                  | 4.83E-01 | 3                  | 4.83E-01 |
| CEP112   | 17  | 5                  | 6.83E-01 | 5                  | 6.83E-01 | 3                  | 4.47E-01 | 3                  | 4.47E-01 | 4                  | 3.94E-01 | 4                  | 3.94E-01 |
| PRRC1    | 5   | 1                  | 4.02E-01 | 1                  | 4.02E-01 | 1                  | 3.94E-01 | 1                  | 3.94E-01 |                    |          |                    |          |
| DHDH     | 19  | 3                  | 4.74E-01 | 5                  | 2.47E-01 | 2                  | 3.94E-01 | 4                  | 1.00E+00 | 2                  | 6.31E-01 | 4                  | 5.49E-01 |
| RPH3A    | 12  | 5                  | 3.99E-01 | 5                  | 3.99E-01 | 4                  | 7.03E-01 | 4                  | 7.03E-01 | 3                  | 3.95E-01 | 3                  | 3.95E-01 |
| CTRB1    | 16  | 1                  | 1.53E-01 | 1                  | 1.53E-01 | 1                  | 3.95E-01 | 1                  | 3.95E-01 |                    |          |                    |          |
| CFAP69   | 7   | 2                  | 3.03E-01 | 3                  | 3.03E-01 | 2                  | 6.18E-01 | 3                  | 6.18E-01 |                    |          | 1                  | 3.95E-01 |
| ATP12A   | 13  | 6                  | 2.15E-02 | 6                  | 2.15E-02 | 5                  | 3.95E-01 | 5                  | 3.95E-01 | 4                  | 4.59E-01 | 4                  | 4.59E-01 |
| ARHGEF37 | 5   | 2                  | 3.50E-01 | 3                  | 3.50E-01 | 1                  | 3.95E-01 | 2                  | 3.95E-01 | 1                  | 6.13E-01 | 2                  | 6.13E-01 |
| TADA1    | 1   | 2                  | 7.38E-01 | 2                  | 7.38E-01 | 1                  | 3.95E-01 | 1                  | 3.95E-01 | 2                  | 4.51E-01 | 2                  | 4.51E-01 |
| MDGA1    | 6   | 1                  | 4.02E-01 | 1                  | 4.02E-01 | 1                  | 3.95E-01 | 1                  | 3.95E-01 |                    |          |                    |          |
| DDX19B   | 16  | 1                  | 5.03E-01 | 1                  | 5.03E-01 | 1                  | 3.95E-01 | 1                  | 3.95E-01 | 1                  | 1.00E+00 | 1                  | 1.00E+00 |
| CCDC83   | 11  | 4                  | 1.38E-01 | 5                  | 5.26E-02 | 4                  | 4.83E-01 | 5                  | 3.95E-01 |                    |          | 1                  | 7.71E-01 |
| PDSS1    | 10  | 1                  | 1.00E+00 | 1                  | 1.00E+00 | 1                  | 3.95E-01 | 1                  | 3.95E-01 | 1                  | 6.12E-01 | 1                  | 6.12E-01 |
| PAX4     | 7   | 3                  | 4.19E-01 | 3                  | 4.19E-01 | 3                  | 3.95E-01 | 3                  | 3.95E-01 | 1                  | 6.05E-01 | 1                  | 6.05E-01 |
| ENPP2    | 8   | 5                  | 1.00E+00 | 5                  | 1.00E+00 | 5                  | 3.95E-01 | 5                  | 3.95E-01 | 3                  | 5.29E-01 | 3                  | 5.29E-01 |
| ADAMTS3  | 4   | 4                  | 2.40E-01 | 4                  | 2.40E-01 | 3                  | 3.96E-01 | 3                  | 3.96E-01 | 3                  | 1.00E+00 | 3                  | 1.00E+00 |
| SEMA3G   | 3   | 4                  | 1.00E+00 | 4                  | 1.00E+00 | 4                  | 3.96E-01 | 4                  | 3.96E-01 | 3                  | 5.04E-01 | 3                  | 5.04E-01 |
| C8A      | 1   | 6                  | 7.38E-01 | 6                  | 7.38E-01 | 5                  | 3.96E-01 | 5                  | 3.96E-01 | 4                  | 1.00E+00 | 4                  | 1.00E+00 |
| C14orf39 | 14  | 2                  | 6.43E-01 | 2                  | 6.43E-01 | 1                  | 3.96E-01 | 1                  | 3.96E-01 | 2                  | 6.31E-01 | 2                  | 6.31E-01 |
| TJP3     | 19  | 10                 | 9.00E-01 | 10                 | 9.00E-01 | 10                 | 3.96E-01 | 10                 | 3.96E-01 | 4                  | 4.76E-01 | 4                  | 4.76E-01 |
| ITGAE    | 17  | 5                  | 3.48E-02 | 6                  | 3.48E-02 | 5                  | 3.96E-01 | 6                  | 3.96E-01 | 5                  | 5.96E-01 | 6                  | 5.96E-01 |
| EFHB     | 3   | 7                  | 5.92E-01 | 7                  | 5.92E-01 | 4                  | 5.13E-01 | 4                  | 5.13E-01 | 4                  | 3.96E-01 | 4                  | 3.96E-01 |
| R3HDM1   | 2   | 2                  | 5.73E-01 | 3                  | 3.88E-01 | 2                  | 6.36E-01 | 3                  | 3.96E-01 |                    |          | 1                  | 5.01E-01 |
| TBCK     | 4   | 3                  | 3.30E-01 | 3                  | 3.30E-01 | 3                  | 3.96E-01 | 3                  | 3.96E-01 | 1                  | 6.16E-01 | 1                  | 6.16E-01 |
| TMEM253  | 14  | 1                  | 5.85E-01 | 1                  | 5.85E-01 | 1                  | 3.96E-01 | 1                  | 3.96E-01 | 1                  | 6.56E-01 | 1                  | 6.56E-01 |
| CLTCL1   | 22  | 9                  | 8.94E-01 | 11                 | 6.55E-01 | 8                  | 6.20E-01 | 10                 | 5.53E-01 | 4                  | 6.33E-01 | 6                  | 3.96E-01 |
| CHRM5    | 15  | 4                  | 1.27E-01 | 4                  | 1.27E-01 | 2                  | 3.97E-01 | 2                  | 3.97E-01 | 2                  | 6.51E-01 | 2                  | 6.51E-01 |
| COL4A4   | 2   | 5                  | 8.09E-01 | 5                  | 8.09E-01 | 4                  | 3.97E-01 | 4                  | 3.97E-01 | 3                  | 5.88E-01 | 3                  | 5.88E-01 |
| RNF149   | 2   | 2                  | 2.97E-01 | 2                  | 2.97E-01 | 2                  | 3.97E-01 | 2                  | 3.97E-01 | 1                  | 6.53E-01 | 1                  | 6.53E-01 |
| TCHH     | 1   | 6                  | 5.80E-01 | 7                  | 5.81E-01 | 6                  | 3.97E-01 | 7                  | 3.97E-01 | 4                  | 4.09E-01 | 5                  | 4.09E-01 |
| RICTOR   | 5   | 1                  | 5.80E-01 | 1                  | 5.80E-01 | 1                  | 3.97E-01 | 1                  | 3.97E-01 | 1                  | 6.50E-01 | 1                  | 6.50E-01 |
| MRPL50   | 9   | 1                  | 4.07E-01 | 2                  | 5.84E-01 | 1                  | 4.54E-01 | 2                  | 5.35E-01 |                    |          | 1                  | 3.97E-01 |
| CEACAM18 | 19  | 2                  | 3.58E-01 | 2                  | 3.58E-01 | 1                  | 3.97E-01 | 1                  | 3.97E-01 | 1                  | 7.02E-01 | 1                  | 7.02E-01 |
| MRGPRX2  | 11  |                    |          | 1                  | 8.44E-01 |                    |          | 1                  | 3.98E-01 |                    |          | 1                  | 5.00E-01 |
| ME1      | 6   | 4                  | 6.74E-01 | 4                  | 6.74E-01 | 3                  | 7.00E-01 | 3                  | 7.00E-01 | 3                  | 3.98E-01 | 3                  | 3.98E-01 |
| ANO3     | 11  | 3                  | 2.45E-01 | 3                  | 2.45E-01 | 3                  | 1.00E+00 | 3                  | 1.00E+00 | 1                  | 3.98E-01 | 1                  | 3.98E-01 |
| NOTCH2   | 1   | 5                  | 8.67E-01 | 5                  | 8.67E-01 | 4                  | 3.98E-01 | 4                  | 3.98E-01 | 2                  | 4.60E-01 | 2                  | 4.60E-01 |
| ZCCHC6   | 9   | 3                  | 6.13E-01 | 3                  | 6.13E-01 | 2                  | 3.98E-01 | 2                  | 3.98E-01 | 2                  | 6.11E-01 | 2                  | 6.11E-01 |
| FAM198A  | 3   | 2                  | 3.64E-01 | 3                  | 3.64E-01 | 1                  | 3.98E-01 | 2                  | 4.27E-01 | 1                  | 6.23E-01 | 2                  | 6.74E-01 |
| PARD3B   | 2   | 10                 | 5.87E-01 | 10                 | 5.87E-01 | 9                  | 6.54E-01 | 9                  | 6.54E-01 | 6                  | 3.98E-01 | 6                  | 3.98E-01 |
| SLC34A3  | 9   | 3                  | 2.20E-02 | 3                  | 2.20E-02 | 1                  | 4.74E-01 | 1                  | 4.74E-01 | 3                  | 3.98E-01 | 3                  | 3.98E-01 |

| SetID   | Chr | ADEH- vs NA        |          |                    |          | ADEH+ vs ADEH-     |          |                    |          | ADEH+ vs NA        |          |                    |          |
|---------|-----|--------------------|----------|--------------------|----------|--------------------|----------|--------------------|----------|--------------------|----------|--------------------|----------|
|         |     | rarenovel          |          | all                |          | rarenovel          |          | all                |          | rarenovel          |          | all                |          |
|         |     | N variants in test | p-value  | N variants in test | p-value  | N variants in test | p-value  | N variants in test | p-value  | N variants in test | p-value  | N variants in test | p-value  |
| RIMBP2  | 12  | 4                  | 1.41E-01 | 4                  | 1.41E-01 | 1                  | 3.98E-01 | 1                  | 3.98E-01 | 3                  | 5.22E-01 | 3                  | 5.22E-01 |
| FERMT3  | 11  | 5                  | 1.79E-01 | 5                  | 1.79E-01 | 4                  | 1.00E+00 | 4                  | 1.00E+00 | 2                  | 3.98E-01 | 2                  | 3.98E-01 |
| CFAP73  | 12  | 1                  | 4.26E-01 | 1                  | 4.26E-01 | 1                  | 3.99E-01 | 1                  | 3.99E-01 | 1                  | 6.80E-01 | 1                  | 6.80E-01 |
| CSRP2BP | 20  | 2                  | 2.11E-01 | 2                  | 2.11E-01 | 2                  | 1.00E+00 | 2                  | 1.00E+00 | 1                  | 3.99E-01 | 1                  | 3.99E-01 |
| ZNF491  | 19  | 3                  | 6.87E-01 | 3                  | 6.87E-01 | 3                  | 3.99E-01 | 3                  | 3.99E-01 | 2                  | 6.44E-01 | 2                  | 6.44E-01 |
| OTOF    | 2   | 15                 | 7.40E-01 | 15                 | 7.40E-01 | 10                 | 3.99E-01 | 10                 | 3.99E-01 | 10                 | 4.68E-01 | 10                 | 4.68E-01 |
| SIGMAR1 | 9   | 1                  | 5.92E-01 | 1                  | 5.92E-01 | 1                  | 3.99E-01 | 1                  | 3.99E-01 | 1                  | 6.42E-01 | 1                  | 6.42E-01 |
| PTPRM   | 18  | 4                  | 2.46E-01 | 4                  | 2.46E-01 | 3                  | 7.51E-01 | 3                  | 7.51E-01 | 3                  | 3.99E-01 | 3                  | 3.99E-01 |
| BTBD18  | 11  | 2                  | 9.76E-02 | 2                  | 9.76E-02 | 2                  | 3.99E-01 | 2                  | 3.99E-01 |                    |          |                    |          |
| SLCO1A2 | 12  | 3                  | 6.31E-01 | 4                  | 3.80E-01 | 2                  | 6.36E-01 | 3                  | 7.92E-01 | 1                  | 6.04E-01 | 2                  | 3.99E-01 |
| MROH2A  | 2   | 4                  | 3.63E-01 | 4                  | 3.63E-01 | 4                  | 3.99E-01 | 4                  | 3.99E-01 | 1                  | 4.47E-01 | 1                  | 4.47E-01 |
| PGAP3   | 17  | 5                  | 2.77E-01 | 5                  | 2.77E-01 | 5                  | 3.99E-01 | 5                  | 3.99E-01 | 1                  | 6.31E-01 | 1                  | 6.31E-01 |
| SCCPDH  | 1   |                    |          | 1                  | 8.98E-01 |                    |          | 1                  | 4.00E-01 |                    |          | 1                  | 4.40E-01 |
| CX3CL1  | 16  | 2                  | 3.52E-01 | 2                  | 3.52E-01 | 1                  | 4.00E-01 | 1                  | 4.00E-01 | 1                  | 6.18E-01 | 1                  | 6.18E-01 |
| FASTK   | 7   | 1                  | 9.09E-01 | 1                  | 9.09E-01 | 1                  | 4.00E-01 | 1                  | 4.00E-01 | 1                  | 6.44E-01 | 1                  | 6.44E-01 |
| SLC7A13 | 8   | 4                  | 5.52E-01 | 4                  | 5.52E-01 | 3                  | 5.51E-01 | 3                  | 5.51E-01 | 2                  | 4.00E-01 | 2                  | 4.00E-01 |
| TULP4   | 6   | 7                  | 1.94E-01 | 7                  | 1.94E-01 | 3                  | 6.57E-01 | 3                  | 6.57E-01 | 5                  | 4.00E-01 | 5                  | 4.00E-01 |
| FOCAD   | 9   | 7                  | 6.60E-01 | 7                  | 6.60E-01 | 7                  | 4.00E-01 | 7                  | 4.00E-01 | 1                  | 4.53E-01 | 1                  | 4.53E-01 |
| PCDHA11 | 5   | 5                  | 4.54E-01 | 5                  | 4.54E-01 | 4                  | 6.07E-01 | 4                  | 6.07E-01 | 3                  | 4.00E-01 | 3                  | 4.00E-01 |
| INTU    | 4   | 4                  | 4.17E-01 | 4                  | 4.17E-01 | 4                  | 4.00E-01 | 4                  | 4.00E-01 | 1                  | 6.08E-01 | 1                  | 6.08E-01 |
| USH2A   | 1   | 22                 | 1.91E-01 | 22                 | 1.91E-01 | 20                 | 6.19E-01 | 20                 | 6.19E-01 | 11                 | 4.00E-01 | 11                 | 4.00E-01 |
| AOC2    | 17  | 5                  | 7.98E-01 | 5                  | 7.98E-01 | 4                  | 4.36E-01 | 4                  | 4.36E-01 | 3                  | 4.00E-01 | 3                  | 4.00E-01 |
| ACAD8   | 11  | 3                  | 2.74E-01 | 3                  | 2.74E-01 | 1                  | 4.00E-01 | 1                  | 4.00E-01 | 3                  | 1.00E+00 | 3                  | 1.00E+00 |
| ZNF432  | 19  | 5                  | 7.66E-02 | 5                  | 7.66E-02 | 3                  | 4.00E-01 | 3                  | 4.00E-01 | 5                  | 8.47E-01 | 5                  | 8.47E-01 |
| WDR17   | 4   | 5                  | 1.53E-01 | 5                  | 1.53E-01 | 5                  | 4.00E-01 | 5                  | 4.00E-01 | 4                  | 5.44E-01 | 4                  | 5.44E-01 |
| HAS1    | 19  | 7                  | 7.07E-01 | 7                  | 7.07E-01 | 6                  | 7.26E-01 | 6                  | 7.26E-01 | 4                  | 4.00E-01 | 4                  | 4.00E-01 |
| KRT19   | 17  | 4                  | 2.19E-01 | 4                  | 2.19E-01 | 3                  | 4.01E-01 | 3                  | 4.01E-01 | 2                  | 1.00E+00 | 2                  | 1.00E+00 |
| DMGDH   | 5   | 7                  | 2.06E-02 | 7                  | 2.06E-02 | 2                  | 6.40E-01 | 2                  | 6.40E-01 | 5                  | 4.01E-01 | 5                  | 4.01E-01 |
| ACVR1C  | 2   | 1                  | 9.30E-01 | 1                  | 9.30E-01 | 1                  | 4.01E-01 | 1                  | 4.01E-01 | 1                  | 6.48E-01 | 1                  | 6.48E-01 |
| TARS    | 5   | 5                  | 3.94E-01 | 5                  | 3.94E-01 | 2                  | 4.01E-01 | 2                  | 4.01E-01 | 5                  | 8.19E-01 | 5                  | 8.19E-01 |
| RXFP4   | 1   | 1                  | 7.37E-01 | 1                  | 7.37E-01 | 1                  | 4.01E-01 | 1                  | 4.01E-01 |                    |          |                    |          |
| DAOA    | 13  | 1                  | 7.37E-01 | 1                  | 7.37E-01 | 1                  | 4.01E-01 | 1                  | 4.01E-01 |                    |          |                    |          |
| CIR1    | 2   | 3                  | 1.58E-01 | 3                  | 1.58E-01 | 1                  | 4.01E-01 | 1                  | 4.01E-01 | 2                  | 6.33E-01 | 2                  | 6.33E-01 |
| ZSWIM4  | 19  | 4                  | 2.83E-01 | 4                  | 2.83E-01 | 4                  | 4.01E-01 | 4                  | 4.01E-01 | 2                  | 4.86E-01 | 2                  | 4.86E-01 |
| SLFN12L | 17  | 1                  | 3.98E-01 | 1                  | 3.98E-01 | 1                  | 4.01E-01 | 1                  | 4.01E-01 |                    |          |                    |          |
| AKAP12  | 6   | 8                  | 1.00E+00 | 8                  | 1.00E+00 | 6                  | 4.01E-01 | 6                  | 4.01E-01 | 5                  | 4.02E-01 | 5                  | 4.02E-01 |
| ARVCF   | 22  | 6                  | 3.38E-01 | 6                  | 3.38E-01 | 5                  | 4.01E-01 | 5                  | 4.01E-01 | 1                  | 6.64E-01 | 1                  | 6.64E-01 |
| OR52D1  | 11  | 5                  | 2.37E-02 | 7                  | 2.31E-02 | 2                  | 6.29E-01 | 4                  | 7.27E-01 | 5                  | 4.01E-01 | 7                  | 4.06E-01 |
| TBL3    | 16  | 7                  | 8.59E-01 | 7                  | 8.59E-01 | 5                  | 4.49E-01 | 5                  | 4.49E-01 | 3                  | 4.01E-01 | 3                  | 4.01E-01 |
| RABIF   | 1   | 1                  | 4.15E-01 | 1                  | 4.15E-01 | 1                  | 4.02E-01 | 1                  | 4.02E-01 |                    |          |                    |          |
| POC1A   | 3   | 6                  | 1.77E-01 | 6                  | 1.77E-01 | 4                  | 8.66E-01 | 4                  | 8.66E-01 | 3                  | 4.02E-01 | 3                  | 4.02E-01 |
| NPAS1   | 19  | 1                  | 1.79E-01 | 1                  | 1.79E-01 | 1                  | 4.02E-01 | 1                  | 4.02E-01 |                    |          |                    |          |
| FAM124A | 13  | 5                  | 1.00E+00 | 5                  | 1.00E+00 | 5                  | 4.02E-01 | 5                  | 4.02E-01 | 3                  | 4.92E-01 | 3                  | 4.92E-01 |
| HGFAC   | 4   | 4                  | 3.49E-01 | 4                  | 3.49E-01 | 4                  | 4.02E-01 | 4                  | 4.02E-01 | 2                  | 1.00E+00 | 2                  | 1.00E+00 |
| LGALS2  | 22  | 3                  | 7.57E-01 | 3                  | 7.57E-01 | 2                  | 4.02E-01 | 2                  | 4.02E-01 | 2                  | 6.44E-01 | 2                  | 6.44E-01 |
| RPTN    | 1   | 2                  | 1.03E-01 | 2                  | 1.03E-01 | 2                  | 4.02E-01 | 2                  | 4.02E-01 |                    |          |                    |          |
| CACNA1E | 1   | 5                  | 7.91E-01 | 5                  | 7.91E-01 | 4                  | 4.64E-01 | 4                  | 4.64E-01 | 3                  | 4.02E-01 | 3                  | 4.02E-01 |
| NCOA2   | 8   | 5                  | 4.33E-01 | 5                  | 4.33E-01 | 3                  | 5.71E-01 | 3                  | 5.71E-01 | 3                  | 4.02E-01 | 3                  | 4.02E-01 |

| SetID       | Chr | ADEH- vs NA        |          |                    |          | ADEH+ vs ADEH-     |          |                    |          | ADEH+ vs NA        |          |                    |          |
|-------------|-----|--------------------|----------|--------------------|----------|--------------------|----------|--------------------|----------|--------------------|----------|--------------------|----------|
|             |     | rare novel         |          | all                |          | rare novel         |          | all                |          | rare novel         |          | all                |          |
|             |     | N variants in test | p-value  | N variants in test | p-value  | N variants in test | p-value  | N variants in test | p-value  | N variants in test | p-value  | N variants in test | p-value  |
| IL4I1       | 19  | 2                  | 4.28E-01 | 2                  | 4.28E-01 | 2                  | 4.02E-01 | 2                  | 4.02E-01 | 1                  | 6.36E-01 | 1                  | 6.36E-01 |
| KCNU1       | 8   | 3                  | 1.00E+00 | 4                  | 1.00E+00 | 3                  | 4.03E-01 | 4                  | 4.73E-01 | 2                  | 4.95E-01 | 3                  | 5.11E-01 |
| ZNF418      | 19  | 6                  | 3.01E-02 | 6                  | 3.01E-02 | 2                  | 6.67E-01 | 2                  | 6.67E-01 | 4                  | 4.03E-01 | 4                  | 4.03E-01 |
| CBARP       | 19  | 5                  | 7.91E-01 | 5                  | 7.91E-01 | 3                  | 4.03E-01 | 3                  | 4.03E-01 | 4                  | 7.60E-01 | 4                  | 7.60E-01 |
| TRIM22      | 11  | 4                  | 5.77E-01 | 4                  | 5.77E-01 | 3                  | 4.03E-01 | 3                  | 4.03E-01 | 3                  | 1.00E+00 | 3                  | 1.00E+00 |
| PMFBP1      | 16  | 5                  | 6.49E-01 | 5                  | 6.49E-01 | 3                  | 4.57E-01 | 3                  | 4.57E-01 | 4                  | 4.03E-01 | 4                  | 4.03E-01 |
| SSCS5D      | 19  | 4                  | 2.18E-01 | 4                  | 2.18E-01 | 2                  | 1.00E+00 | 2                  | 1.00E+00 | 3                  | 4.03E-01 | 3                  | 4.03E-01 |
| DHRS9       | 2   | 3                  | 5.19E-01 | 3                  | 5.19E-01 | 2                  | 4.03E-01 | 2                  | 4.03E-01 | 2                  | 6.43E-01 | 2                  | 6.43E-01 |
| SPATA21     | 1   |                    |          | 1                  | 2.89E-01 |                    |          | 1                  | 7.62E-01 |                    |          | 1                  | 4.03E-01 |
| FMO3        | 1   | 3                  | 1.05E-01 | 3                  | 1.05E-01 | 3                  | 4.03E-01 | 3                  | 4.03E-01 |                    |          |                    |          |
| CENPN       | 16  | 2                  | 5.85E-01 | 3                  | 4.76E-01 | 2                  | 6.17E-01 | 3                  | 4.19E-01 |                    |          | 1                  | 4.03E-01 |
| CCDC148     | 2   | 2                  | 4.04E-01 | 2                  | 4.04E-01 | 1                  | 4.54E-01 | 1                  | 4.54E-01 | 2                  | 4.04E-01 | 2                  | 4.04E-01 |
| NOS2        | 17  | 4                  | 7.89E-01 | 4                  | 7.89E-01 | 4                  | 4.40E-01 | 4                  | 4.40E-01 | 1                  | 4.04E-01 | 1                  | 4.04E-01 |
| PRDM16      | 1   | 5                  | 3.73E-01 | 5                  | 3.73E-01 | 4                  | 4.04E-01 | 4                  | 4.04E-01 | 1                  | 5.37E-01 | 1                  | 5.37E-01 |
| TGFBR3L     | 19  | 1                  | 4.09E-01 | 1                  | 4.09E-01 | 1                  | 4.04E-01 | 1                  | 4.04E-01 |                    |          |                    |          |
| TNNI3K      | 1   | 7                  | 6.84E-01 | 7                  | 6.84E-01 | 4                  | 4.40E-01 | 4                  | 4.40E-01 | 4                  | 4.04E-01 | 4                  | 4.04E-01 |
| FPGT-TNNI3K | 1   | 7                  | 6.84E-01 | 7                  | 6.84E-01 | 4                  | 4.40E-01 | 4                  | 4.40E-01 | 4                  | 4.04E-01 | 4                  | 4.04E-01 |
| CCDC53      | 12  | 1                  | 1.00E+00 | 1                  | 1.00E+00 | 1                  | 4.04E-01 | 1                  | 4.04E-01 | 1                  | 5.95E-01 | 1                  | 5.95E-01 |
| PCCA        | 13  | 1                  | 4.12E-01 | 1                  | 4.12E-01 | 1                  | 4.04E-01 | 1                  | 4.04E-01 |                    |          |                    |          |
| STAB1       | 3   | 11                 | 5.09E-01 | 11                 | 5.09E-01 | 7                  | 4.41E-01 | 7                  | 4.41E-01 | 4                  | 4.04E-01 | 4                  | 4.04E-01 |
| MIIP        | 1   | 3                  | 1.30E-01 | 3                  | 1.30E-01 | 1                  | 4.04E-01 | 1                  | 4.04E-01 | 2                  | 6.26E-01 | 2                  | 6.26E-01 |
| DYRK2       | 12  | 1                  | 7.23E-01 | 1                  | 7.23E-01 | 1                  | 4.04E-01 | 1                  | 4.04E-01 |                    |          |                    |          |
| C16orf74    | 16  | 1                  | 7.23E-01 | 1                  | 7.23E-01 | 1                  | 4.04E-01 | 1                  | 4.04E-01 |                    |          |                    |          |
| SLC38A4     | 12  | 1                  | 7.23E-01 | 1                  | 7.23E-01 | 1                  | 4.04E-01 | 1                  | 4.04E-01 |                    |          |                    |          |
| RPE         | 2   | 1                  | 1.93E-01 | 1                  | 1.93E-01 | 1                  | 4.04E-01 | 1                  | 4.04E-01 | 1                  | 4.43E-01 | 1                  | 4.43E-01 |
| CDYL        | 6   | 1                  | 7.23E-01 | 1                  | 7.23E-01 | 1                  | 4.04E-01 | 1                  | 4.04E-01 |                    |          |                    |          |
| TAS2R40     | 7   | 1                  | 7.23E-01 | 1                  | 7.23E-01 | 1                  | 4.04E-01 | 1                  | 4.04E-01 |                    |          |                    |          |
| SMPDL3B     | 1   | 1                  | 6.55E-01 | 2                  | 6.56E-01 | 1                  | 4.04E-01 | 2                  | 4.05E-01 | 1                  | 6.49E-01 | 2                  | 6.50E-01 |
| RAB11FIP4   | 17  | 1                  | 3.99E-01 | 1                  | 3.99E-01 | 1                  | 4.04E-01 | 1                  | 4.04E-01 |                    |          |                    |          |
| SUSD6       | 14  | 2                  | 1.00E+00 | 2                  | 1.00E+00 | 2                  | 4.05E-01 | 2                  | 4.05E-01 | 2                  | 6.17E-01 | 2                  | 6.17E-01 |
| PAPSS1      | 4   | 5                  | 9.11E-02 | 5                  | 9.11E-02 | 5                  | 4.05E-01 | 5                  | 4.05E-01 |                    |          |                    |          |
| PNKD        | 2   | 4                  | 2.33E-01 | 4                  | 2.33E-01 | 3                  | 4.05E-01 | 3                  | 4.05E-01 | 1                  | 7.00E-01 | 1                  | 7.00E-01 |
| FGD4        | 12  | 2                  | 3.99E-01 | 2                  | 3.99E-01 | 2                  | 4.05E-01 | 2                  | 4.05E-01 | 1                  | 6.58E-01 | 1                  | 6.58E-01 |
| RBM44       | 2   | 3                  | 3.04E-01 | 3                  | 3.04E-01 | 2                  | 4.05E-01 | 2                  | 4.05E-01 | 1                  | 6.75E-01 | 1                  | 6.75E-01 |
| LPCAT2      | 16  | 3                  | 1.50E-01 | 3                  | 1.50E-01 | 2                  | 4.05E-01 | 2                  | 4.05E-01 | 1                  | 6.24E-01 | 1                  | 6.24E-01 |
| PASK        | 2   | 12                 | 1.13E-01 | 12                 | 1.13E-01 | 12                 | 4.05E-01 | 12                 | 4.05E-01 | 4                  | 4.95E-01 | 4                  | 4.95E-01 |
| WDR90       | 16  | 13                 | 4.38E-01 | 14                 | 4.48E-01 | 8                  | 4.06E-01 | 9                  | 4.10E-01 | 8                  | 5.18E-01 | 9                  | 4.62E-01 |
| PCDHGB6     | 5   | 6                  | 2.20E-01 | 6                  | 2.20E-01 | 5                  | 4.06E-01 | 5                  | 4.06E-01 | 1                  | 5.81E-01 | 1                  | 5.81E-01 |
| C3orf17     | 3   | 8                  | 5.07E-01 | 8                  | 5.07E-01 | 8                  | 4.18E-01 | 8                  | 4.18E-01 | 4                  | 4.06E-01 | 4                  | 4.06E-01 |
| BCAR3       | 1   | 5                  | 6.40E-01 | 5                  | 6.40E-01 | 4                  | 4.06E-01 | 4                  | 4.06E-01 | 4                  | 6.11E-01 | 4                  | 6.11E-01 |
| JPH3        | 16  | 7                  | 1.32E-01 | 7                  | 1.32E-01 | 3                  | 7.90E-01 | 3                  | 7.90E-01 | 4                  | 4.06E-01 | 4                  | 4.06E-01 |
| EPS8        | 12  | 3                  | 1.17E-01 | 3                  | 1.17E-01 | 3                  | 4.06E-01 | 3                  | 4.06E-01 |                    |          |                    |          |
| NEK11       | 3   | 4                  | 3.64E-01 | 4                  | 3.64E-01 | 3                  | 4.06E-01 | 3                  | 4.06E-01 | 1                  | 6.55E-01 | 1                  | 6.55E-01 |
| C6orf89     | 6   | 2                  | 1.85E-01 | 2                  | 1.85E-01 | 1                  | 4.06E-01 | 1                  | 4.06E-01 | 2                  | 4.60E-01 | 2                  | 4.60E-01 |
| ZBTB26      | 9   | 1                  | 4.06E-01 | 1                  | 4.06E-01 | 1                  | 4.07E-01 | 1                  | 4.07E-01 |                    |          |                    |          |
| ITGAV       | 2   | 6                  | 4.01E-02 | 6                  | 4.01E-02 | 2                  | 6.23E-01 | 2                  | 6.23E-01 | 4                  | 4.07E-01 | 4                  | 4.07E-01 |
| RAD54B      | 8   | 2                  | 7.50E-02 | 2                  | 7.50E-02 | 1                  | 4.07E-01 | 1                  | 4.07E-01 | 1                  | 4.54E-01 | 1                  | 4.54E-01 |
| MMS19       | 10  | 3                  | 1.00E+00 | 3                  | 1.00E+00 | 3                  | 4.07E-01 | 3                  | 4.07E-01 | 3                  | 4.46E-01 | 3                  | 4.46E-01 |

| SetID    | Chr | ADEH- vs NA        |          |                    |          | ADEH+ vs ADEH-     |          |                    |          | ADEH+ vs NA        |          |                    |          |
|----------|-----|--------------------|----------|--------------------|----------|--------------------|----------|--------------------|----------|--------------------|----------|--------------------|----------|
|          |     | rarenovel          |          | all                |          | rarenovel          |          | all                |          | rarenovel          |          | all                |          |
|          |     | N variants in test | p-value  | N variants in test | p-value  | N variants in test | p-value  | N variants in test | p-value  | N variants in test | p-value  | N variants in test | p-value  |
| CPSF7    | 11  | 1                  | 3.93E-01 | 1                  | 3.93E-01 | 1                  | 4.07E-01 | 1                  | 4.07E-01 |                    |          |                    |          |
| CHRNA9   | 4   | 5                  | 1.05E-01 | 5                  | 1.05E-01 | 5                  | 4.07E-01 | 5                  | 4.07E-01 |                    |          |                    |          |
| ZFYVE16  | 5   | 6                  | 3.24E-01 | 6                  | 3.24E-01 | 4                  | 5.88E-01 | 4                  | 5.88E-01 | 3                  | 4.07E-01 | 3                  | 4.07E-01 |
| AGL      | 1   | 9                  | 2.83E-01 | 10                 | 3.32E-01 | 8                  | 7.27E-01 | 9                  | 1.00E+00 | 4                  | 6.73E-01 | 5                  | 4.07E-01 |
| GBE1     | 3   | 3                  | 2.16E-01 | 3                  | 2.16E-01 | 3                  | 4.07E-01 | 3                  | 4.07E-01 |                    |          |                    |          |
| CAPN1    | 11  | 5                  | 6.56E-01 | 5                  | 6.56E-01 | 3                  | 4.07E-01 | 3                  | 4.07E-01 | 3                  | 5.11E-01 | 3                  | 5.11E-01 |
| PENK     | 8   | 5                  | 7.20E-02 | 5                  | 7.20E-02 | 5                  | 4.07E-01 | 5                  | 4.07E-01 |                    |          |                    |          |
| UNC5A    | 5   | 7                  | 4.61E-02 | 7                  | 4.61E-02 | 4                  | 5.63E-01 | 4                  | 5.63E-01 | 3                  | 4.07E-01 | 3                  | 4.07E-01 |
| BTC      | 4   | 1                  | 7.44E-01 | 2                  | 7.47E-01 | 1                  | 5.07E-01 | 2                  | 5.10E-01 |                    |          | 1                  | 4.07E-01 |
| OR1L6    | 9   | 3                  | 2.85E-01 | 4                  | 6.48E-01 | 2                  | 4.08E-01 | 3                  | 1.00E+00 | 1                  | 6.55E-01 | 2                  | 1.00E+00 |
| VWDE     | 7   | 11                 | 4.02E-01 | 15                 | 3.29E-01 | 9                  | 1.00E+00 | 13                 | 4.08E-01 | 4                  | 9.19E-01 | 8                  | 1.00E+00 |
| FBXO30   | 6   | 1                  | 5.77E-01 | 1                  | 5.77E-01 | 1                  | 4.08E-01 | 1                  | 4.08E-01 | 1                  | 6.26E-01 | 1                  | 6.26E-01 |
| STARD13  | 13  | 6                  | 6.75E-01 | 6                  | 6.75E-01 | 4                  | 4.89E-01 | 4                  | 4.89E-01 | 4                  | 4.08E-01 | 4                  | 4.08E-01 |
| ITGAD    | 16  | 6                  | 3.76E-01 | 6                  | 3.76E-01 | 4                  | 4.08E-01 | 4                  | 4.08E-01 | 3                  | 4.31E-01 | 3                  | 4.31E-01 |
| ZZEF1    | 17  | 8                  | 4.03E-01 | 8                  | 4.03E-01 | 6                  | 4.38E-01 | 6                  | 4.38E-01 | 3                  | 4.08E-01 | 3                  | 4.08E-01 |
| MRPL4    | 19  | 2                  | 6.97E-01 | 2                  | 6.97E-01 | 1                  | 4.08E-01 | 1                  | 4.08E-01 | 2                  | 4.73E-01 | 2                  | 4.73E-01 |
| MAP3K6   | 1   | 4                  | 5.65E-02 | 4                  | 5.65E-02 | 4                  | 4.08E-01 | 4                  | 4.08E-01 | 2                  | 7.35E-01 | 2                  | 7.35E-01 |
| ADGRE5   | 19  | 2                  | 1.00E+00 | 2                  | 1.00E+00 | 2                  | 4.08E-01 | 2                  | 4.08E-01 | 2                  | 5.75E-01 | 2                  | 5.75E-01 |
| FBL      | 19  | 3                  | 7.73E-02 | 3                  | 7.73E-02 | 1                  | 4.09E-01 | 1                  | 4.09E-01 | 3                  | 4.46E-01 | 3                  | 4.46E-01 |
| CDH10    | 5   | 4                  | 1.45E-03 | 4                  | 1.45E-03 |                    |          |                    |          | 4                  | 4.09E-01 | 4                  | 4.09E-01 |
| NRN1L    | 16  | 1                  | 3.82E-01 | 1                  | 3.82E-01 | 1                  | 4.09E-01 | 1                  | 4.09E-01 |                    |          |                    |          |
| NEFH     | 22  | 1                  | 4.18E-01 | 1                  | 4.18E-01 | 1                  | 4.09E-01 | 1                  | 4.09E-01 |                    |          |                    |          |
| PAICS    | 4   | 2                  | 7.99E-01 | 2                  | 7.99E-01 | 2                  | 4.09E-01 | 2                  | 4.09E-01 | 2                  | 6.65E-01 | 2                  | 6.65E-01 |
| ZSCAN9   | 6   |                    |          | 1                  | 3.34E-01 |                    |          | 1                  | 4.09E-01 |                    |          | 1                  | 1.00E+00 |
| CDH17    | 8   | 4                  | 2.27E-03 | 4                  | 2.27E-03 |                    |          |                    |          | 4                  | 4.09E-01 | 4                  | 4.09E-01 |
| TANK     | 2   | 3                  | 6.66E-01 | 3                  | 6.66E-01 | 3                  | 4.09E-01 | 3                  | 4.09E-01 | 1                  | 4.38E-01 | 1                  | 4.38E-01 |
| METAP1D  | 2   | 4                  | 4.58E-01 | 4                  | 4.58E-01 | 3                  | 5.36E-01 | 3                  | 5.36E-01 | 3                  | 4.09E-01 | 3                  | 4.09E-01 |
| FANCC    | 9   | 6                  | 5.81E-02 | 6                  | 5.81E-02 | 6                  | 8.14E-01 | 6                  | 8.14E-01 | 2                  | 4.09E-01 | 2                  | 4.09E-01 |
| PCDHAC1  | 5   | 5                  | 7.71E-01 | 5                  | 7.71E-01 | 4                  | 4.09E-01 | 4                  | 4.09E-01 | 3                  | 5.57E-01 | 3                  | 5.57E-01 |
| EIF3A    | 10  | 4                  | 7.94E-01 | 4                  | 7.94E-01 | 4                  | 4.10E-01 | 4                  | 4.10E-01 | 1                  | 4.50E-01 | 1                  | 4.50E-01 |
| HORMAD2  | 22  | 2                  | 1.34E-01 | 2                  | 1.34E-01 | 2                  | 4.10E-01 | 2                  | 4.10E-01 |                    |          |                    |          |
| OR2AE1   | 7   | 4                  | 5.87E-01 | 4                  | 5.87E-01 | 4                  | 4.10E-01 | 4                  | 4.10E-01 | 3                  | 5.17E-01 | 3                  | 5.17E-01 |
| MNS1     | 15  | 4                  | 8.24E-01 | 4                  | 8.24E-01 | 3                  | 4.10E-01 | 3                  | 4.10E-01 | 2                  | 8.25E-01 | 2                  | 8.25E-01 |
| SEC31A   | 4   | 6                  | 7.34E-02 | 6                  | 7.34E-02 | 2                  | 5.80E-01 | 2                  | 5.80E-01 | 4                  | 4.10E-01 | 4                  | 4.10E-01 |
| IQSEC1   | 3   | 2                  | 5.67E-01 | 3                  | 7.39E-01 | 2                  | 6.39E-01 | 3                  | 5.24E-01 |                    |          | 1                  | 4.10E-01 |
| CCDC80   | 3   | 2                  | 4.14E-01 | 2                  | 4.14E-01 | 2                  | 1.00E+00 | 2                  | 1.00E+00 | 1                  | 4.10E-01 | 1                  | 4.10E-01 |
| PIK3C2A  | 11  | 6                  | 6.79E-01 | 6                  | 6.79E-01 | 5                  | 4.10E-01 | 5                  | 4.10E-01 | 2                  | 6.46E-01 | 2                  | 6.46E-01 |
| RRS1     | 8   | 2                  | 1.66E-01 | 2                  | 1.66E-01 | 2                  | 5.68E-01 | 2                  | 5.68E-01 | 2                  | 4.10E-01 | 2                  | 4.10E-01 |
| 14-Sep   | 7   | 2                  | 6.71E-01 | 2                  | 6.71E-01 | 1                  | 4.10E-01 | 1                  | 4.10E-01 | 2                  | 6.29E-01 | 2                  | 6.29E-01 |
| MAGI1    | 3   | 5                  | 1.57E-02 | 5                  | 1.57E-02 | 1                  | 4.95E-01 | 1                  | 4.95E-01 | 4                  | 4.10E-01 | 4                  | 4.10E-01 |
| PAH      | 12  | 7                  | 7.10E-01 | 7                  | 7.10E-01 | 5                  | 4.10E-01 | 5                  | 4.10E-01 | 3                  | 5.21E-01 | 3                  | 5.21E-01 |
| CRB1     | 1   | 7                  | 5.08E-01 | 7                  | 5.08E-01 | 5                  | 4.10E-01 | 5                  | 4.10E-01 | 3                  | 5.32E-01 | 3                  | 5.32E-01 |
| DNAAF1   | 16  | 2                  | 6.28E-01 | 2                  | 6.28E-01 | 1                  | 4.10E-01 | 1                  | 4.10E-01 | 2                  | 6.28E-01 | 2                  | 6.28E-01 |
| AKAP3    | 12  | 5                  | 6.82E-01 | 5                  | 6.82E-01 | 4                  | 4.10E-01 | 4                  | 4.10E-01 | 2                  | 6.46E-01 | 2                  | 6.46E-01 |
| CLCN1    | 7   | 5                  | 1.72E-01 | 5                  | 1.72E-01 | 5                  | 1.00E+00 | 5                  | 1.00E+00 | 2                  | 4.10E-01 | 2                  | 4.10E-01 |
| MAN2C1   | 15  | 9                  | 4.99E-01 | 9                  | 4.99E-01 | 6                  | 4.10E-01 | 6                  | 4.10E-01 | 3                  | 5.03E-01 | 3                  | 5.03E-01 |
| TMPRSS15 | 21  | 6                  | 6.19E-01 | 6                  | 6.19E-01 | 6                  | 7.13E-01 | 6                  | 7.13E-01 | 4                  | 4.11E-01 | 4                  | 4.11E-01 |
| QSER1    | 11  | 6                  | 3.89E-01 | 7                  | 5.71E-01 | 5                  | 6.11E-01 | 6                  | 4.11E-01 | 4                  | 7.35E-01 | 5                  | 6.85E-01 |

| SetID    | Chr | ADEH- vs NA        |          |                    |          | ADEH+ vs ADEH-     |          |                    |          | ADEH+ vs NA        |          |                    |          |
|----------|-----|--------------------|----------|--------------------|----------|--------------------|----------|--------------------|----------|--------------------|----------|--------------------|----------|
|          |     | rarenovel          |          | all                |          | rarenovel          |          | all                |          | rarenovel          |          | all                |          |
|          |     | N variants in test | p-value  | N variants in test | p-value  | N variants in test | p-value  | N variants in test | p-value  | N variants in test | p-value  | N variants in test | p-value  |
| LEF1     | 4   | 4                  | 7.56E-01 | 4                  | 7.56E-01 | 4                  | 4.11E-01 | 4                  | 4.11E-01 | 2                  | 6.05E-01 | 2                  | 6.05E-01 |
| C22orf15 | 22  | 1                  | 2.34E-01 | 1                  | 2.34E-01 | 1                  | 4.11E-01 | 1                  | 4.11E-01 |                    |          |                    |          |
| PFN4     | 2   | 1                  | 5.08E-01 | 1                  | 5.08E-01 | 1                  | 4.11E-01 | 1                  | 4.11E-01 | 1                  | 4.42E-01 | 1                  | 4.42E-01 |
| STXBP5   | 6   | 1                  | 1.00E+00 | 1                  | 1.00E+00 | 1                  | 4.11E-01 | 1                  | 4.11E-01 | 1                  | 4.54E-01 | 1                  | 4.54E-01 |
| LRRC27   | 10  | 2                  | 3.94E-01 | 2                  | 3.94E-01 | 1                  | 4.11E-01 | 1                  | 4.11E-01 | 1                  | 6.16E-01 | 1                  | 6.16E-01 |
| FRRS1    | 1   | 1                  | 7.36E-01 | 1                  | 7.36E-01 | 1                  | 4.11E-01 | 1                  | 4.11E-01 |                    |          |                    |          |
| ACOX3    | 4   | 2                  | 3.37E-02 | 2                  | 3.37E-02 | 1                  | 4.11E-01 | 1                  | 4.11E-01 | 1                  | 4.48E-01 | 1                  | 4.48E-01 |
| MMP19    | 12  | 1                  | 7.36E-01 | 1                  | 7.36E-01 | 1                  | 4.11E-01 | 1                  | 4.11E-01 |                    |          |                    |          |
| PSTPIP1  | 15  | 1                  | 7.36E-01 | 1                  | 7.36E-01 | 1                  | 4.11E-01 | 1                  | 4.11E-01 |                    |          |                    |          |
| SCARB2   | 4   | 1                  | 7.36E-01 | 1                  | 7.36E-01 | 1                  | 4.11E-01 | 1                  | 4.11E-01 |                    |          |                    |          |
| C1orf122 | 1   | 2                  | 3.98E-01 | 2                  | 3.98E-01 | 1                  | 4.11E-01 | 1                  | 4.11E-01 | 1                  | 6.50E-01 | 1                  | 6.50E-01 |
| PDP2     | 16  | 1                  | 7.36E-01 | 1                  | 7.36E-01 | 1                  | 4.11E-01 | 1                  | 4.11E-01 |                    |          |                    |          |
| C11orf98 | 11  | 1                  | 7.36E-01 | 1                  | 7.36E-01 | 1                  | 4.11E-01 | 1                  | 4.11E-01 |                    |          |                    |          |
| ICE2     | 15  | 1                  | 7.36E-01 | 1                  | 7.36E-01 | 1                  | 4.11E-01 | 1                  | 4.11E-01 |                    |          |                    |          |
| LBHD1    | 11  | 1                  | 7.36E-01 | 1                  | 7.36E-01 | 1                  | 4.11E-01 | 1                  | 4.11E-01 |                    |          |                    |          |
| LTB4R2   | 14  | 1                  | 7.36E-01 | 1                  | 7.36E-01 | 1                  | 4.11E-01 | 1                  | 4.11E-01 |                    |          |                    |          |
| PDE6G    | 17  | 1                  | 7.36E-01 | 1                  | 7.36E-01 | 1                  | 4.11E-01 | 1                  | 4.11E-01 |                    |          |                    |          |
| ST14     | 11  | 4                  | 5.59E-01 | 4                  | 5.59E-01 | 2                  | 6.12E-01 | 2                  | 6.12E-01 | 2                  | 4.11E-01 | 2                  | 4.11E-01 |
| CNTN2    | 1   | 4                  | 1.42E-01 | 4                  | 1.42E-01 | 1                  | 4.12E-01 | 1                  | 4.12E-01 | 3                  | 5.00E-01 | 3                  | 5.00E-01 |
| CASP10   | 2   | 4                  | 4.71E-01 | 4                  | 4.71E-01 | 4                  | 6.03E-01 | 4                  | 6.03E-01 | 3                  | 4.12E-01 | 3                  | 4.12E-01 |
| NKX6-1   | 4   | 1                  | 7.44E-01 | 1                  | 7.44E-01 | 1                  | 4.12E-01 | 1                  | 4.12E-01 |                    |          |                    |          |
| PRPF18   | 10  | 1                  | 6.53E-01 | 1                  | 6.53E-01 | 1                  | 4.12E-01 | 1                  | 4.12E-01 | 1                  | 5.63E-01 | 1                  | 5.63E-01 |
| AQP6     | 12  | 1                  | 7.44E-01 | 1                  | 7.44E-01 | 1                  | 4.12E-01 | 1                  | 4.12E-01 |                    |          |                    |          |
| RAB36    | 22  | 2                  | 3.00E-01 | 2                  | 3.00E-01 | 1                  | 4.12E-01 | 1                  | 4.12E-01 | 2                  | 6.37E-01 | 2                  | 6.37E-01 |
| CBFA2T2  | 20  | 1                  | 7.44E-01 | 1                  | 7.44E-01 | 1                  | 4.12E-01 | 1                  | 4.12E-01 |                    |          |                    |          |
| HOXD3    | 2   | 1                  | 7.44E-01 | 1                  | 7.44E-01 | 1                  | 4.12E-01 | 1                  | 4.12E-01 |                    |          |                    |          |
| IQCK     | 16  | 2                  | 6.83E-01 | 3                  | 6.80E-01 | 2                  | 4.12E-01 | 3                  | 4.14E-01 | 1                  | 1.00E+00 | 2                  | 5.37E-01 |
| ZNF446   | 19  | 1                  | 3.97E-01 | 1                  | 3.97E-01 | 1                  | 4.12E-01 | 1                  | 4.12E-01 |                    |          |                    |          |
| ZNF750   | 17  | 3                  | 2.59E-02 | 4                  | 2.77E-02 | 2                  | 4.12E-01 | 3                  | 4.57E-01 | 2                  | 1.00E+00 | 3                  | 1.00E+00 |
| CCDC113  | 16  | 3                  | 5.52E-01 | 3                  | 5.52E-01 | 2                  | 4.64E-01 | 2                  | 4.64E-01 | 2                  | 4.12E-01 | 2                  | 4.12E-01 |
| TRIM45   | 1   | 9                  | 3.62E-01 | 9                  | 3.62E-01 | 8                  | 4.12E-01 | 8                  | 4.12E-01 | 3                  | 1.00E+00 | 3                  | 1.00E+00 |
| PLA2G4E  | 15  | 1                  | 4.14E-01 | 2                  | 1.47E-01 | 1                  | 4.12E-01 | 2                  | 1.00E+00 |                    |          | 1                  | 4.99E-01 |
| TEX35    | 1   | 1                  | 8.14E-01 | 1                  | 8.14E-01 | 1                  | 4.13E-01 | 1                  | 4.13E-01 | 1                  | 4.29E-01 | 1                  | 4.29E-01 |
| OR51F2   | 11  | 1                  | 4.09E-01 | 2                  | 3.26E-01 | 1                  | 4.13E-01 | 2                  | 4.98E-01 |                    |          | 1                  | 6.25E-01 |
| CYP3A5   | 7   | 2                  | 5.34E-01 | 2                  | 5.34E-01 | 2                  | 4.13E-01 | 2                  | 4.13E-01 | 1                  | 6.46E-01 | 1                  | 6.46E-01 |
| MAEL     | 1   | 2                  | 6.89E-01 | 2                  | 6.89E-01 | 1                  | 4.13E-01 | 1                  | 4.13E-01 | 2                  | 4.65E-01 | 2                  | 4.65E-01 |
| ARMC12   | 6   | 2                  | 1.25E-01 | 2                  | 1.25E-01 | 2                  | 4.13E-01 | 2                  | 4.13E-01 |                    |          |                    |          |
| PLEKHJ1  | 19  | 1                  | 1.00E+00 | 1                  | 1.00E+00 | 1                  | 4.13E-01 | 1                  | 4.13E-01 | 1                  | 6.04E-01 | 1                  | 6.04E-01 |
| MCEE     | 2   | 3                  | 5.95E-01 | 3                  | 5.95E-01 | 3                  | 4.13E-01 | 3                  | 4.13E-01 | 2                  | 4.63E-01 | 2                  | 4.63E-01 |
| ARID3C   | 9   | 2                  | 2.20E-01 | 2                  | 2.20E-01 | 1                  | 4.13E-01 | 1                  | 4.13E-01 | 2                  | 4.72E-01 | 2                  | 4.72E-01 |
| NCOA7    | 6   | 6                  | 8.25E-01 | 6                  | 8.25E-01 | 4                  | 5.02E-01 | 4                  | 5.02E-01 | 4                  | 4.13E-01 | 4                  | 4.13E-01 |
| APBB1    | 11  | 3                  | 4.08E-01 | 3                  | 4.08E-01 | 3                  | 4.13E-01 | 3                  | 4.13E-01 | 1                  | 6.32E-01 | 1                  | 6.32E-01 |
| NSMF     | 9   | 1                  | 4.13E-01 | 1                  | 4.13E-01 | 1                  | 4.13E-01 | 1                  | 4.13E-01 |                    |          |                    |          |
| NEU3     | 11  | 8                  | 3.55E-01 | 8                  | 3.55E-01 | 7                  | 4.13E-01 | 7                  | 4.13E-01 | 3                  | 5.73E-01 | 3                  | 5.73E-01 |
| AMOTL1   | 11  | 6                  | 3.50E-01 | 6                  | 3.50E-01 | 5                  | 4.13E-01 | 5                  | 4.13E-01 | 1                  | 6.58E-01 | 1                  | 6.58E-01 |
| RNF186   | 1   | 3                  | 1.00E+00 | 3                  | 1.00E+00 | 3                  | 4.14E-01 | 3                  | 4.14E-01 | 2                  | 7.06E-01 | 2                  | 7.06E-01 |
| COL27A1  | 9   | 6                  | 2.64E-01 | 6                  | 2.64E-01 | 4                  | 4.14E-01 | 4                  | 4.14E-01 | 2                  | 6.32E-01 | 2                  | 6.32E-01 |
| RXFP1    | 4   | 4                  | 1.91E-03 | 4                  | 1.91E-03 |                    |          |                    |          | 4                  | 4.14E-01 | 4                  | 4.14E-01 |

| SetID        | Chr | ADEH- vs NA        |          |                    |          | ADEH+ vs ADEH-     |          |                    |          | ADEH+ vs NA        |          |                    |          |
|--------------|-----|--------------------|----------|--------------------|----------|--------------------|----------|--------------------|----------|--------------------|----------|--------------------|----------|
|              |     | rarenovel          |          | all                |          | rarenovel          |          | all                |          | rarenovel          |          | all                |          |
|              |     | N variants in test | p-value  | N variants in test | p-value  | N variants in test | p-value  | N variants in test | p-value  | N variants in test | p-value  | N variants in test | p-value  |
| NOX3         | 6   | 4                  | 1.41E-02 | 4                  | 1.41E-02 | 1                  | 5.14E-01 | 1                  | 5.14E-01 | 3                  | 4.14E-01 | 3                  | 4.14E-01 |
| GTSE1        | 22  | 8                  | 5.79E-01 | 8                  | 5.79E-01 | 8                  | 4.14E-01 | 8                  | 4.14E-01 | 2                  | 6.34E-01 | 2                  | 6.34E-01 |
| ISOC2        | 19  | 1                  | 7.95E-01 | 1                  | 7.95E-01 | 1                  | 4.14E-01 | 1                  | 4.14E-01 | 1                  | 6.57E-01 | 1                  | 6.57E-01 |
| KLK11        | 19  | 1                  | 7.51E-01 | 2                  | 8.09E-01 | 1                  | 4.84E-01 | 2                  | 6.11E-01 |                    |          | 1                  | 4.15E-01 |
| PSCA         | 8   | 1                  | 2.87E-01 | 1                  | 2.87E-01 | 1                  | 4.15E-01 | 1                  | 4.15E-01 | 1                  | 1.00E+00 | 1                  | 1.00E+00 |
| SPEG         | 2   | 9                  | 5.77E-01 | 9                  | 5.77E-01 | 9                  | 5.35E-01 | 9                  | 5.35E-01 | 4                  | 4.15E-01 | 4                  | 4.15E-01 |
| GATB         | 4   | 2                  | 7.98E-01 | 2                  | 7.98E-01 | 2                  | 4.15E-01 | 2                  | 4.15E-01 | 1                  | 4.56E-01 | 1                  | 4.56E-01 |
| CEP290       | 12  | 13                 | 3.22E-01 | 13                 | 3.22E-01 | 12                 | 4.15E-01 | 12                 | 4.15E-01 | 7                  | 5.66E-01 | 7                  | 5.66E-01 |
| CDC45        | 22  | 4                  | 2.41E-01 | 4                  | 2.41E-01 | 3                  | 4.15E-01 | 3                  | 4.15E-01 | 1                  | 5.69E-01 | 1                  | 5.69E-01 |
| CCR3         | 3   | 4                  | 1.75E-02 | 4                  | 1.75E-02 | 1                  | 4.73E-01 | 1                  | 4.73E-01 | 4                  | 4.16E-01 | 4                  | 4.16E-01 |
| SLC27A5      | 19  | 4                  | 9.73E-02 | 4                  | 9.73E-02 | 3                  | 4.16E-01 | 3                  | 4.16E-01 | 2                  | 1.00E+00 | 2                  | 1.00E+00 |
| KCNJ14       | 19  | 1                  | 4.12E-01 | 1                  | 4.12E-01 | 1                  | 4.16E-01 | 1                  | 4.16E-01 |                    |          |                    |          |
| MCM3AP       | 21  | 7                  | 3.57E-01 | 7                  | 3.57E-01 | 6                  | 4.16E-01 | 6                  | 4.16E-01 | 1                  | 6.75E-01 | 1                  | 6.75E-01 |
| MTHFD1L      | 6   | 3                  | 6.79E-01 | 3                  | 6.79E-01 | 3                  | 4.16E-01 | 3                  | 4.16E-01 | 3                  | 4.79E-01 | 3                  | 4.79E-01 |
| FMOD         | 1   | 1                  | 4.43E-01 | 1                  | 4.43E-01 | 1                  | 4.16E-01 | 1                  | 4.16E-01 |                    |          |                    |          |
| KRTAP9-4     | 17  | 2                  | 1.00E+00 | 2                  | 1.00E+00 | 2                  | 4.16E-01 | 2                  | 4.16E-01 | 2                  | 4.40E-01 | 2                  | 4.40E-01 |
| ELF3         | 1   | 1                  | 4.06E-01 | 1                  | 4.06E-01 | 1                  | 4.16E-01 | 1                  | 4.16E-01 |                    |          |                    |          |
| SLC6A20      | 3   | 4                  | 1.27E-02 | 5                  | 2.60E-02 | 1                  | 5.57E-01 | 2                  | 7.80E-01 | 3                  | 4.16E-01 | 4                  | 4.41E-01 |
| TP53AIP1     | 11  | 2                  | 1.36E-01 | 2                  | 1.36E-01 | 2                  | 4.16E-01 | 2                  | 4.16E-01 |                    |          |                    |          |
| KIF20B       | 10  | 7                  | 1.84E-01 | 9                  | 1.85E-01 | 6                  | 4.17E-01 | 8                  | 4.17E-01 | 4                  | 6.24E-01 | 6                  | 6.24E-01 |
| ATG4D        | 19  | 4                  | 6.98E-01 | 4                  | 6.98E-01 | 4                  | 4.17E-01 | 4                  | 4.17E-01 | 2                  | 5.29E-01 | 2                  | 5.29E-01 |
| TRIOBP       | 22  | 13                 | 7.84E-01 | 13                 | 7.84E-01 | 11                 | 5.56E-01 | 11                 | 5.56E-01 | 6                  | 4.17E-01 | 6                  | 4.17E-01 |
| SECTM1       | 17  | 1                  | 8.70E-01 | 1                  | 8.70E-01 | 1                  | 4.17E-01 | 1                  | 4.17E-01 | 1                  | 4.43E-01 | 1                  | 4.43E-01 |
| COG6         | 13  | 4                  | 2.50E-02 | 4                  | 2.50E-02 | 1                  | 5.01E-01 | 1                  | 5.01E-01 | 4                  | 4.17E-01 | 4                  | 4.17E-01 |
| SYBU         | 8   | 3                  | 8.35E-01 | 3                  | 8.35E-01 | 3                  | 4.17E-01 | 3                  | 4.17E-01 | 1                  | 4.59E-01 | 1                  | 4.59E-01 |
| CABS1        | 4   |                    |          | 1                  | 5.35E-01 |                    |          | 1                  | 4.17E-01 |                    |          | 1                  | 7.67E-01 |
| SFXN2        | 10  | 4                  | 8.14E-01 | 4                  | 8.14E-01 | 3                  | 4.17E-01 | 3                  | 4.17E-01 | 2                  | 8.14E-01 | 2                  | 8.14E-01 |
| CFHR5        | 1   | 4                  | 5.96E-01 | 4                  | 5.96E-01 | 4                  | 5.43E-01 | 4                  | 5.43E-01 | 2                  | 4.18E-01 | 2                  | 4.18E-01 |
| TMC8         | 17  | 4                  | 3.68E-01 | 4                  | 3.68E-01 | 3                  | 4.18E-01 | 3                  | 4.18E-01 | 2                  | 1.00E+00 | 2                  | 1.00E+00 |
| ZNF284       | 19  | 4                  | 3.04E-01 | 4                  | 3.04E-01 | 4                  | 4.18E-01 | 4                  | 4.18E-01 | 1                  | 6.17E-01 | 1                  | 6.17E-01 |
| CCDC24       | 1   | 1                  | 3.82E-01 | 1                  | 3.82E-01 | 1                  | 4.18E-01 | 1                  | 4.18E-01 | 1                  | 1.00E+00 | 1                  | 1.00E+00 |
| LSS          | 21  | 4                  | 5.23E-01 | 4                  | 5.23E-01 | 2                  | 4.18E-01 | 2                  | 4.18E-01 | 4                  | 5.53E-01 | 4                  | 5.53E-01 |
| EPHB3        | 3   | 1                  | 7.16E-01 | 1                  | 7.16E-01 | 1                  | 4.18E-01 | 1                  | 4.18E-01 |                    |          |                    |          |
| COX6C        | 8   | 1                  | 7.16E-01 | 1                  | 7.16E-01 | 1                  | 4.18E-01 | 1                  | 4.18E-01 |                    |          |                    |          |
| OR52A5       | 11  | 1                  | 7.16E-01 | 1                  | 7.16E-01 | 1                  | 4.18E-01 | 1                  | 4.18E-01 |                    |          |                    |          |
| KLK3         | 19  | 3                  | 1.72E-01 | 3                  | 1.72E-01 | 1                  | 4.18E-01 | 1                  | 4.18E-01 | 2                  | 6.32E-01 | 2                  | 6.32E-01 |
| KRTAP8-1     | 21  | 1                  | 7.16E-01 | 1                  | 7.16E-01 | 1                  | 4.18E-01 | 1                  | 4.18E-01 |                    |          |                    |          |
| SSTR5        | 16  | 1                  | 7.16E-01 | 1                  | 7.16E-01 | 1                  | 4.18E-01 | 1                  | 4.18E-01 |                    |          |                    |          |
| LIPG         | 18  | 1                  | 4.16E-01 | 1                  | 4.16E-01 | 1                  | 4.18E-01 | 1                  | 4.18E-01 |                    |          |                    |          |
| PRSS45       | 3   | 2                  | 3.71E-01 | 2                  | 3.71E-01 | 1                  | 4.18E-01 | 1                  | 4.18E-01 | 1                  | 6.00E-01 | 1                  | 6.00E-01 |
| TRPV6        | 7   | 6                  | 1.95E-01 | 6                  | 1.95E-01 | 3                  | 4.18E-01 | 3                  | 4.18E-01 | 6                  | 8.54E-01 | 6                  | 8.54E-01 |
| FCMR         | 1   | 1                  | 4.50E-01 | 1                  | 4.50E-01 | 1                  | 4.18E-01 | 1                  | 4.18E-01 | 1                  | 4.49E-01 | 1                  | 4.49E-01 |
| AGBL5        | 2   | 3                  | 2.90E-01 | 3                  | 2.90E-01 | 1                  | 4.95E-01 | 1                  | 4.95E-01 | 2                  | 4.18E-01 | 2                  | 4.18E-01 |
| FDXACB1      | 11  | 3                  | 4.06E-01 | 3                  | 4.06E-01 | 3                  | 4.19E-01 | 3                  | 4.19E-01 | 1                  | 6.55E-01 | 1                  | 6.55E-01 |
| LOC102724957 | 11  | 1                  | 1.00E+00 | 1                  | 1.00E+00 | 1                  | 4.19E-01 | 1                  | 4.19E-01 | 1                  | 6.18E-01 | 1                  | 6.18E-01 |
| PIK3R4       | 3   | 3                  | 9.41E-02 | 3                  | 9.41E-02 | 3                  | 4.19E-01 | 3                  | 4.19E-01 |                    |          |                    |          |
| PPP1R12C     | 19  | 2                  | 3.35E-01 | 2                  | 3.35E-01 | 1                  | 4.19E-01 | 1                  | 4.19E-01 | 1                  | 7.00E-01 | 1                  | 7.00E-01 |
| POLN         | 4   | 2                  | 5.52E-01 | 3                  | 2.44E-01 | 2                  | 6.67E-01 | 3                  | 4.19E-01 |                    |          | 1                  | 4.44E-01 |

| SetID    | Chr | ADEH- vs NA        |          |                    |          | ADEH+ vs ADEH-     |          |                    |          | ADEH+ vs NA        |          |                    |          |
|----------|-----|--------------------|----------|--------------------|----------|--------------------|----------|--------------------|----------|--------------------|----------|--------------------|----------|
|          |     | rarenovel          |          | all                |          | rarenovel          |          | all                |          | rarenovel          |          | all                |          |
|          |     | N variants in test | p-value  | N variants in test | p-value  | N variants in test | p-value  | N variants in test | p-value  | N variants in test | p-value  | N variants in test | p-value  |
| PCDHA10  | 5   | 13                 | 3.88E-01 | 14                 | 5.75E-01 | 9                  | 6.48E-01 | 10                 | 4.19E-01 | 6                  | 5.90E-01 | 7                  | 5.55E-01 |
| FAM160A1 | 4   | 6                  | 2.72E-01 | 6                  | 2.72E-01 | 5                  | 6.71E-01 | 5                  | 6.71E-01 | 4                  | 4.19E-01 | 4                  | 4.19E-01 |
| LRRC66   | 4   | 4                  | 3.78E-01 | 4                  | 3.78E-01 | 3                  | 4.19E-01 | 3                  | 4.19E-01 | 2                  | 4.66E-01 | 2                  | 4.66E-01 |
| SLC4A5   | 2   | 7                  | 9.26E-02 | 7                  | 9.26E-02 | 7                  | 4.19E-01 | 7                  | 4.19E-01 |                    |          |                    |          |
| CEP72    | 5   | 2                  | 4.17E-01 | 2                  | 4.17E-01 | 1                  | 5.28E-01 | 1                  | 5.28E-01 | 2                  | 4.19E-01 | 2                  | 4.19E-01 |
| EFCAB7   | 1   | 4                  | 6.95E-01 | 4                  | 6.95E-01 | 4                  | 1.00E+00 | 4                  | 1.00E+00 | 3                  | 4.19E-01 | 3                  | 4.19E-01 |
| NCAN     | 19  | 1                  | 4.12E-01 | 1                  | 4.12E-01 | 1                  | 4.19E-01 | 1                  | 4.19E-01 |                    |          |                    |          |
| OR51B6   | 11  | 1                  | 4.02E-01 | 2                  | 3.93E-01 | 1                  | 4.19E-01 | 2                  | 4.21E-01 |                    |          | 1                  | 6.83E-01 |
| GPATCH4  | 1   | 1                  | 7.26E-01 | 1                  | 7.26E-01 | 1                  | 4.20E-01 | 1                  | 4.20E-01 |                    |          |                    |          |
| CD83     | 6   | 1                  | 7.26E-01 | 1                  | 7.26E-01 | 1                  | 4.20E-01 | 1                  | 4.20E-01 |                    |          |                    |          |
| ACTBL2   | 5   | 1                  | 7.26E-01 | 1                  | 7.26E-01 | 1                  | 4.20E-01 | 1                  | 4.20E-01 |                    |          |                    |          |
| RHOBTB3  | 5   | 1                  | 7.26E-01 | 1                  | 7.26E-01 | 1                  | 4.20E-01 | 1                  | 4.20E-01 |                    |          |                    |          |
| GTF2H3   | 12  | 1                  | 7.26E-01 | 1                  | 7.26E-01 | 1                  | 4.20E-01 | 1                  | 4.20E-01 |                    |          |                    |          |
| FZD3     | 8   | 1                  | 7.26E-01 | 1                  | 7.26E-01 | 1                  | 4.20E-01 | 1                  | 4.20E-01 |                    |          |                    |          |
| STOM     | 9   | 1                  | 7.26E-01 | 1                  | 7.26E-01 | 1                  | 4.20E-01 | 1                  | 4.20E-01 |                    |          |                    |          |
| RRP9     | 3   | 3                  | 3.88E-01 | 3                  | 3.88E-01 | 3                  | 4.20E-01 | 3                  | 4.20E-01 | 3                  | 6.37E-01 | 3                  | 6.37E-01 |
| SLBP     | 4   | 2                  | 4.53E-01 | 2                  | 4.53E-01 | 1                  | 4.20E-01 | 1                  | 4.20E-01 | 2                  | 4.39E-01 | 2                  | 4.39E-01 |
| MROH2B   | 5   | 7                  | 8.70E-01 | 7                  | 8.70E-01 | 5                  | 4.20E-01 | 5                  | 4.20E-01 | 3                  | 5.14E-01 | 3                  | 5.14E-01 |
| FAM183A  | 1   | 2                  | 5.03E-01 | 2                  | 5.03E-01 | 2                  | 4.20E-01 | 2                  | 4.20E-01 | 1                  | 6.65E-01 | 1                  | 6.65E-01 |
| SLC2A4RG | 20  | 2                  | 3.71E-01 | 2                  | 3.71E-01 | 1                  | 4.20E-01 | 1                  | 4.20E-01 | 1                  | 6.85E-01 | 1                  | 6.85E-01 |
| IL6ST    | 5   | 2                  | 8.79E-01 | 2                  | 8.79E-01 | 2                  | 4.20E-01 | 2                  | 4.20E-01 | 2                  | 4.80E-01 | 2                  | 4.80E-01 |
| HS3ST6   | 16  | 6                  | 1.00E+00 | 6                  | 1.00E+00 | 5                  | 4.20E-01 | 5                  | 4.20E-01 | 5                  | 6.85E-01 | 5                  | 6.85E-01 |
| MGA      | 15  | 6                  | 8.33E-01 | 6                  | 8.33E-01 | 5                  | 4.50E-01 | 5                  | 4.50E-01 | 4                  | 4.20E-01 | 4                  | 4.20E-01 |
| LAMA5    | 20  | 26                 | 7.79E-01 | 27                 | 7.34E-01 | 23                 | 6.65E-01 | 24                 | 5.96E-01 | 16                 | 4.74E-01 | 17                 | 4.20E-01 |
| SLC34A1  | 5   | 4                  | 8.72E-01 | 4                  | 8.72E-01 | 3                  | 4.20E-01 | 3                  | 4.20E-01 | 3                  | 5.71E-01 | 3                  | 5.71E-01 |
| ARFGAP1  | 20  | 1                  | 4.12E-01 | 2                  | 3.59E-01 | 1                  | 4.20E-01 | 2                  | 7.42E-01 |                    |          | 1                  | 8.73E-01 |
| DNAJC21  | 5   | 4                  | 8.42E-02 | 4                  | 8.42E-02 | 3                  | 5.77E-01 | 3                  | 5.77E-01 | 2                  | 4.20E-01 | 2                  | 4.20E-01 |
| PGPEP1L  | 15  | 1                  | 7.61E-01 | 2                  | 7.84E-01 | 1                  | 5.02E-01 | 2                  | 5.08E-01 |                    |          | 1                  | 4.20E-01 |
| CUX1     | 7   | 2                  | 3.81E-01 | 2                  | 3.81E-01 | 2                  | 1.00E+00 | 2                  | 1.00E+00 | 1                  | 4.20E-01 | 1                  | 4.20E-01 |
| PHACTR3  | 20  | 4                  | 5.03E-01 | 4                  | 5.03E-01 | 3                  | 4.20E-01 | 3                  | 4.20E-01 | 1                  | 6.06E-01 | 1                  | 6.06E-01 |
| ZNF665   | 19  | 2                  | 7.13E-01 | 2                  | 7.13E-01 | 1                  | 4.20E-01 | 1                  | 4.20E-01 | 2                  | 6.43E-01 | 2                  | 6.43E-01 |
| TLE1     | 9   | 1                  | 9.23E-01 | 1                  | 9.23E-01 | 1                  | 4.21E-01 | 1                  | 4.21E-01 | 1                  | 4.53E-01 | 1                  | 4.53E-01 |
| KIF13A   | 6   | 5                  | 1.56E-01 | 5                  | 1.56E-01 | 5                  | 4.21E-01 | 5                  | 4.21E-01 | 3                  | 6.30E-01 | 3                  | 6.30E-01 |
| PRR19    | 19  | 2                  | 1.00E+00 | 2                  | 1.00E+00 | 2                  | 4.21E-01 | 2                  | 4.21E-01 | 1                  | 4.60E-01 | 1                  | 4.60E-01 |
| B3GAT2   | 6   | 2                  | 3.31E-01 | 2                  | 3.31E-01 | 1                  | 4.21E-01 | 1                  | 4.21E-01 | 1                  | 6.35E-01 | 1                  | 6.35E-01 |
| ICAM4    | 19  | 1                  | 4.18E-01 | 1                  | 4.18E-01 | 1                  | 4.21E-01 | 1                  | 4.21E-01 |                    |          |                    |          |
| ZNF528   | 19  | 8                  | 3.13E-02 | 8                  | 3.13E-02 | 6                  | 7.91E-01 | 6                  | 7.91E-01 | 4                  | 4.21E-01 | 4                  | 4.21E-01 |
| TMEM186  | 16  | 1                  | 9.35E-01 | 1                  | 9.35E-01 | 1                  | 4.21E-01 | 1                  | 4.21E-01 | 1                  | 4.50E-01 | 1                  | 4.50E-01 |
| IRX1     | 5   | 1                  | 4.14E-01 | 1                  | 4.14E-01 | 1                  | 4.21E-01 | 1                  | 4.21E-01 |                    |          |                    |          |
| ERICH6B  | 13  | 5                  | 3.62E-01 | 6                  | 3.62E-01 | 5                  | 7.71E-01 | 6                  | 7.70E-01 | 2                  | 4.22E-01 | 3                  | 4.22E-01 |
| ERV3-1   | 7   | 4                  | 1.00E+00 | 5                  | 1.00E+00 | 4                  | 4.22E-01 | 5                  | 4.80E-01 | 2                  | 6.67E-01 | 3                  | 1.00E+00 |
| KCNN4    | 19  | 2                  | 2.32E-01 | 2                  | 2.32E-01 | 1                  | 4.22E-01 | 1                  | 4.22E-01 | 2                  | 4.89E-01 | 2                  | 4.89E-01 |
| SLF2     | 10  | 4                  | 6.00E-01 | 5                  | 6.00E-01 | 4                  | 7.52E-01 | 5                  | 7.52E-01 | 1                  | 4.22E-01 | 2                  | 4.22E-01 |
| DBN1     | 5   | 1                  | 2.39E-01 | 1                  | 2.39E-01 | 1                  | 4.22E-01 | 1                  | 4.22E-01 |                    |          |                    |          |
| LARP1B   | 4   | 2                  | 2.38E-01 | 3                  | 2.38E-01 | 1                  | 4.22E-01 | 2                  | 4.22E-01 | 1                  | 6.60E-01 | 2                  | 6.61E-01 |
| TRPT1    | 11  | 6                  | 3.37E-01 | 6                  | 3.37E-01 | 6                  | 4.22E-01 | 6                  | 4.22E-01 | 2                  | 8.61E-01 | 2                  | 8.61E-01 |
| HLA-DOA  | 6   | 2                  | 6.77E-01 | 2                  | 6.77E-01 | 1                  | 4.22E-01 | 1                  | 4.22E-01 | 2                  | 6.12E-01 | 2                  | 6.12E-01 |
| OR52N4   | 11  |                    |          | 1                  | 9.09E-02 |                    |          | 1                  | 8.22E-01 |                    |          | 1                  | 4.22E-01 |



| SetID    | Chr | ADEH- vs NA        |          |                    |          | ADEH+ vs ADEH-     |          |                    |          | ADEH+ vs NA        |          |                    |          |
|----------|-----|--------------------|----------|--------------------|----------|--------------------|----------|--------------------|----------|--------------------|----------|--------------------|----------|
|          |     | rarenovel          |          | all                |          | rarenovel          |          | all                |          | rarenovel          |          | all                |          |
|          |     | N variants in test | p-value  | N variants in test | p-value  | N variants in test | p-value  | N variants in test | p-value  | N variants in test | p-value  | N variants in test | p-value  |
| MYO7A    | 11  | 14                 | 5.66E-01 | 14                 | 5.66E-01 | 13                 | 6.66E-01 | 13                 | 6.66E-01 | 5                  | 4.22E-01 | 5                  | 4.22E-01 |
| BPIFB3   | 20  | 7                  | 1.05E-01 | 8                  | 1.06E-01 | 6                  | 1.00E+00 | 7                  | 1.00E+00 | 4                  | 4.22E-01 | 5                  | 4.22E-01 |
| HEATR4   | 14  | 4                  | 7.03E-01 | 4                  | 7.03E-01 | 4                  | 6.25E-01 | 4                  | 6.25E-01 | 2                  | 4.22E-01 | 2                  | 4.22E-01 |
| MTCL1    | 18  | 6                  | 2.22E-01 | 6                  | 2.22E-01 | 3                  | 7.47E-01 | 3                  | 7.47E-01 | 4                  | 4.22E-01 | 4                  | 4.22E-01 |
| ERBB2IP  | 5   | 6                  | 2.12E-01 | 6                  | 2.12E-01 | 4                  | 4.22E-01 | 4                  | 4.22E-01 | 3                  | 1.00E+00 | 3                  | 1.00E+00 |
| TTR      | 18  | 1                  | 2.48E-01 | 1                  | 2.48E-01 | 1                  | 4.22E-01 | 1                  | 4.22E-01 |                    |          |                    |          |
| EPN1     | 19  | 2                  | 3.52E-01 | 2                  | 3.52E-01 | 1                  | 4.22E-01 | 1                  | 4.22E-01 | 1                  | 5.82E-01 | 1                  | 5.82E-01 |
| SEC31B   | 10  | 4                  | 8.13E-01 | 5                  | 8.12E-01 | 3                  | 4.23E-01 | 4                  | 4.42E-01 | 3                  | 4.97E-01 | 4                  | 5.72E-01 |
| RPUSD1   | 16  | 1                  | 5.79E-01 | 1                  | 5.79E-01 | 1                  | 4.23E-01 | 1                  | 4.23E-01 | 1                  | 6.13E-01 | 1                  | 6.13E-01 |
| FAM122A  | 9   | 1                  | 1.47E-01 | 1                  | 1.47E-01 | 1                  | 4.23E-01 | 1                  | 4.23E-01 |                    |          |                    |          |
| STAG3    | 7   | 2                  | 6.71E-01 | 2                  | 6.71E-01 | 1                  | 4.23E-01 | 1                  | 4.23E-01 | 2                  | 6.46E-01 | 2                  | 6.46E-01 |
| PRPF38B  | 1   | 2                  | 7.98E-01 | 2                  | 7.98E-01 | 2                  | 7.27E-01 | 2                  | 7.27E-01 | 1                  | 4.23E-01 | 1                  | 4.23E-01 |
| COPE     | 19  | 1                  | 8.13E-01 | 1                  | 8.13E-01 | 1                  | 4.23E-01 | 1                  | 4.23E-01 | 1                  | 4.55E-01 | 1                  | 4.55E-01 |
| EXOSC6   | 16  | 2                  | 6.53E-01 | 2                  | 6.53E-01 | 2                  | 4.23E-01 | 2                  | 4.23E-01 | 1                  | 4.48E-01 | 1                  | 4.48E-01 |
| TMCC3    | 12  | 6                  | 1.00E+00 | 6                  | 1.00E+00 | 6                  | 4.23E-01 | 6                  | 4.23E-01 | 3                  | 4.75E-01 | 3                  | 4.75E-01 |
| IRX3     | 16  | 1                  | 8.30E-01 | 1                  | 8.30E-01 | 1                  | 4.23E-01 | 1                  | 4.23E-01 | 1                  | 5.17E-01 | 1                  | 5.17E-01 |
| ZFP2     | 5   | 4                  | 3.54E-02 | 4                  | 3.54E-02 | 1                  | 4.23E-01 | 1                  | 4.23E-01 | 3                  | 4.81E-01 | 3                  | 4.81E-01 |
| CRIP1    | 2   | 1                  | 7.42E-01 | 1                  | 7.42E-01 | 1                  | 4.23E-01 | 1                  | 4.23E-01 |                    |          |                    |          |
| LIN7A    | 12  | 1                  | 7.42E-01 | 1                  | 7.42E-01 | 1                  | 4.23E-01 | 1                  | 4.23E-01 |                    |          |                    |          |
| PTDSS1   | 8   | 1                  | 4.07E-01 | 1                  | 4.07E-01 | 1                  | 4.23E-01 | 1                  | 4.23E-01 |                    |          |                    |          |
| RASIP1   | 19  | 1                  | 7.92E-01 | 2                  | 1.00E+00 | 1                  | 4.23E-01 | 2                  | 4.23E-01 | 1                  | 4.53E-01 | 2                  | 4.53E-01 |
| TXNDC8   | 9   | 3                  | 7.37E-03 | 4                  | 2.83E-03 |                    |          | 1                  | 7.38E-01 | 3                  | 5.26E-01 | 4                  | 4.24E-01 |
| ZC2HC1C  | 14  | 1                  | 4.08E-01 | 1                  | 4.08E-01 | 1                  | 4.24E-01 | 1                  | 4.24E-01 |                    |          |                    |          |
| ASTN2    | 9   | 8                  | 1.00E+00 | 8                  | 1.00E+00 | 6                  | 4.24E-01 | 6                  | 4.24E-01 | 3                  | 5.09E-01 | 3                  | 5.09E-01 |
| GFM1     | 3   | 2                  | 1.23E-02 | 2                  | 1.23E-02 |                    |          |                    |          | 2                  | 4.24E-01 | 2                  | 4.24E-01 |
| BHLHE23  | 20  | 1                  | 1.00E+00 | 1                  | 1.00E+00 | 1                  | 4.24E-01 | 1                  | 4.24E-01 | 1                  | 6.68E-01 | 1                  | 6.68E-01 |
| ACE      | 17  | 16                 | 4.63E-02 | 16                 | 4.63E-02 | 14                 | 4.24E-01 | 14                 | 4.24E-01 | 6                  | 4.37E-01 | 6                  | 4.37E-01 |
| VMO1     | 17  | 1                  | 7.60E-01 | 2                  | 7.35E-01 | 1                  | 5.05E-01 | 2                  | 4.62E-01 |                    |          | 1                  | 4.24E-01 |
| TMEM120B | 12  | 1                  | 7.48E-01 | 1                  | 7.48E-01 | 1                  | 4.24E-01 | 1                  | 4.24E-01 |                    |          |                    |          |
| OR10T2   | 1   | 1                  | 7.48E-01 | 1                  | 7.48E-01 | 1                  | 4.24E-01 | 1                  | 4.24E-01 |                    |          |                    |          |
| ZNF280A  | 22  | 1                  | 7.48E-01 | 1                  | 7.48E-01 | 1                  | 4.24E-01 | 1                  | 4.24E-01 |                    |          |                    |          |
| KCTD20   | 6   | 1                  | 4.11E-01 | 1                  | 4.11E-01 | 1                  | 4.24E-01 | 1                  | 4.24E-01 |                    |          |                    |          |
| THSD1    | 13  | 3                  | 1.91E-01 | 3                  | 1.91E-01 | 1                  | 4.24E-01 | 1                  | 4.24E-01 | 2                  | 6.48E-01 | 2                  | 6.48E-01 |
| LYSMD2   | 15  | 1                  | 1.00E+00 | 1                  | 1.00E+00 | 1                  | 4.25E-01 | 1                  | 4.25E-01 | 1                  | 6.52E-01 | 1                  | 6.52E-01 |
| PPP1R9A  | 7   | 6                  | 2.65E-02 | 6                  | 2.65E-02 | 3                  | 8.13E-01 | 3                  | 8.13E-01 | 3                  | 4.25E-01 | 3                  | 4.25E-01 |
| RGMB     | 5   | 1                  | 4.09E-01 | 1                  | 4.09E-01 | 1                  | 4.25E-01 | 1                  | 4.25E-01 |                    |          |                    |          |
| UPP2     | 2   | 2                  | 3.45E-01 | 2                  | 3.45E-01 | 1                  | 4.25E-01 | 1                  | 4.25E-01 | 1                  | 5.81E-01 | 1                  | 5.81E-01 |
| COX7A2L  | 2   | 1                  | 3.98E-01 | 1                  | 3.98E-01 | 1                  | 4.25E-01 | 1                  | 4.25E-01 |                    |          |                    |          |
| TMEM209  | 7   | 2                  | 7.40E-01 | 2                  | 7.40E-01 | 1                  | 4.55E-01 | 1                  | 4.55E-01 | 2                  | 4.25E-01 | 2                  | 4.25E-01 |
| C19orf60 | 19  | 1                  | 1.00E+00 | 1                  | 1.00E+00 | 1                  | 4.25E-01 | 1                  | 4.25E-01 | 1                  | 5.69E-01 | 1                  | 5.69E-01 |
| PLCE1    | 10  | 7                  | 4.60E-01 | 7                  | 4.60E-01 | 6                  | 4.25E-01 | 6                  | 4.25E-01 | 5                  | 4.92E-01 | 5                  | 4.92E-01 |
| WDR7     | 18  | 3                  | 3.33E-01 | 3                  | 3.33E-01 | 3                  | 4.25E-01 | 3                  | 4.25E-01 | 1                  | 6.42E-01 | 1                  | 6.42E-01 |
| EML3     | 11  | 3                  | 2.57E-01 | 3                  | 2.57E-01 | 1                  | 4.25E-01 | 1                  | 4.25E-01 | 3                  | 5.10E-01 | 3                  | 5.10E-01 |
| RNPC3    | 1   | 2                  | 2.83E-02 | 2                  | 2.83E-02 | 1                  | 4.25E-01 | 1                  | 4.25E-01 | 1                  | 4.27E-01 | 1                  | 4.27E-01 |
| GZMA     | 5   | 1                  | 7.41E-01 | 1                  | 7.41E-01 | 1                  | 4.25E-01 | 1                  | 4.25E-01 |                    |          |                    |          |
| RAB3IP   | 12  | 1                  | 7.41E-01 | 1                  | 7.41E-01 | 1                  | 4.25E-01 | 1                  | 4.25E-01 |                    |          |                    |          |
| HAUS1    | 18  | 1                  | 7.41E-01 | 1                  | 7.41E-01 | 1                  | 4.25E-01 | 1                  | 4.25E-01 |                    |          |                    |          |
| KPNA5    | 6   | 1                  | 7.41E-01 | 1                  | 7.41E-01 | 1                  | 4.25E-01 | 1                  | 4.25E-01 |                    |          |                    |          |

| SetID        | Chr | ADEH- vs NA        |          |                    |          | ADEH+ vs ADEH-     |          |                    |          | ADEH+ vs NA        |          |                    |          |
|--------------|-----|--------------------|----------|--------------------|----------|--------------------|----------|--------------------|----------|--------------------|----------|--------------------|----------|
|              |     | rarenovel          |          | all                |          | rarenovel          |          | all                |          | rarenovel          |          | all                |          |
|              |     | N variants in test | p-value  | N variants in test | p-value  | N variants in test | p-value  | N variants in test | p-value  | N variants in test | p-value  | N variants in test | p-value  |
| TTC27        | 2   | 5                  | 4.01E-01 | 7                  | 4.48E-01 | 4                  | 4.25E-01 | 6                  | 4.44E-01 | 2                  | 1.00E+00 | 4                  | 1.00E+00 |
| PTPN14       | 1   | 8                  | 1.59E-01 | 8                  | 1.59E-01 | 5                  | 5.08E-01 | 5                  | 5.08E-01 | 4                  | 4.25E-01 | 4                  | 4.25E-01 |
| RNF212       | 4   | 3                  | 7.62E-01 | 4                  | 7.83E-01 | 3                  | 4.29E-01 | 4                  | 4.26E-01 | 2                  | 4.25E-01 | 3                  | 4.38E-01 |
| CACNA2D4     | 12  | 6                  | 1.00E+00 | 6                  | 1.00E+00 | 5                  | 4.25E-01 | 5                  | 4.25E-01 | 3                  | 4.80E-01 | 3                  | 4.80E-01 |
| EHHADH       | 3   | 7                  | 7.63E-01 | 7                  | 7.63E-01 | 7                  | 4.25E-01 | 7                  | 4.25E-01 | 4                  | 7.96E-01 | 4                  | 7.96E-01 |
| KIAA1217     | 10  | 12                 | 4.69E-01 | 12                 | 4.69E-01 | 10                 | 4.26E-01 | 10                 | 4.26E-01 | 7                  | 5.44E-01 | 7                  | 5.44E-01 |
| SCGB1D1      | 11  | 1                  | 4.14E-01 | 1                  | 4.14E-01 | 1                  | 4.26E-01 | 1                  | 4.26E-01 |                    |          |                    |          |
| FAM129B      | 9   | 1                  | 2.43E-01 | 1                  | 2.43E-01 | 1                  | 4.26E-01 | 1                  | 4.26E-01 |                    |          |                    |          |
| HSBP1L1      | 18  | 1                  | 7.45E-01 | 1                  | 7.45E-01 | 1                  | 4.26E-01 | 1                  | 4.26E-01 |                    |          |                    |          |
| FOXF2        | 6   | 1                  | 7.45E-01 | 1                  | 7.45E-01 | 1                  | 4.26E-01 | 1                  | 4.26E-01 |                    |          |                    |          |
| CHFR         | 12  | 2                  | 4.54E-01 | 2                  | 4.54E-01 | 1                  | 4.26E-01 | 1                  | 4.26E-01 | 1                  | 6.22E-01 | 1                  | 6.22E-01 |
| LCMT2        | 15  | 1                  | 7.45E-01 | 1                  | 7.45E-01 | 1                  | 4.26E-01 | 1                  | 4.26E-01 |                    |          |                    |          |
| BFSP2        | 3   | 1                  | 7.45E-01 | 1                  | 7.45E-01 | 1                  | 4.26E-01 | 1                  | 4.26E-01 |                    |          |                    |          |
| TMIGD2       | 19  | 1                  | 7.45E-01 | 1                  | 7.45E-01 | 1                  | 4.26E-01 | 1                  | 4.26E-01 |                    |          |                    |          |
| KLK12        | 19  | 1                  | 9.27E-01 | 1                  | 9.27E-01 | 1                  | 4.26E-01 | 1                  | 4.26E-01 | 1                  | 6.26E-01 | 1                  | 6.26E-01 |
| MROH6        | 8   | 5                  | 7.50E-01 | 5                  | 7.50E-01 | 3                  | 4.26E-01 | 3                  | 4.26E-01 | 3                  | 6.32E-01 | 3                  | 6.32E-01 |
| ELOVL3       | 10  | 1                  | 4.72E-01 | 1                  | 4.72E-01 | 1                  | 4.26E-01 | 1                  | 4.26E-01 | 1                  | 4.48E-01 | 1                  | 4.48E-01 |
| ZNF780B      | 19  | 7                  | 1.00E-01 | 7                  | 1.00E-01 | 7                  | 4.26E-01 | 7                  | 4.26E-01 |                    |          |                    |          |
| HAGH         | 16  | 2                  | 2.10E-01 | 2                  | 2.10E-01 | 1                  | 4.58E-01 | 1                  | 4.58E-01 | 2                  | 4.26E-01 | 2                  | 4.26E-01 |
| MRPL37       | 1   | 3                  | 1.00E+00 | 3                  | 1.00E+00 | 3                  | 4.26E-01 | 3                  | 4.26E-01 | 2                  | 5.04E-01 | 2                  | 5.04E-01 |
| LY6K         | 8   | 1                  | 4.12E-01 | 1                  | 4.12E-01 | 1                  | 4.26E-01 | 1                  | 4.26E-01 |                    |          |                    |          |
| C11orf57     | 11  | 1                  | 2.41E-01 | 1                  | 2.41E-01 | 1                  | 4.26E-01 | 1                  | 4.26E-01 |                    |          |                    |          |
| TDRD1        | 10  | 3                  | 5.26E-01 | 3                  | 5.26E-01 | 2                  | 7.31E-01 | 2                  | 7.31E-01 | 2                  | 4.27E-01 | 2                  | 4.27E-01 |
| PPRC1        | 10  | 4                  | 5.19E-01 | 4                  | 5.19E-01 | 3                  | 4.27E-01 | 3                  | 4.27E-01 | 3                  | 1.00E+00 | 3                  | 1.00E+00 |
| PCDHA12      | 5   | 9                  | 8.09E-02 | 9                  | 8.09E-02 | 8                  | 5.91E-01 | 8                  | 5.91E-01 | 4                  | 4.27E-01 | 4                  | 4.27E-01 |
| SORCS1       | 10  | 1                  | 4.02E-01 | 1                  | 4.02E-01 | 1                  | 4.27E-01 | 1                  | 4.27E-01 |                    |          |                    |          |
| CHST2        | 3   | 2                  | 3.76E-02 | 2                  | 3.76E-02 | 2                  | 4.27E-01 | 2                  | 4.27E-01 | 1                  | 1.00E+00 | 1                  | 1.00E+00 |
| ANKS3        | 16  | 5                  | 5.99E-01 | 5                  | 5.99E-01 | 4                  | 8.32E-01 | 4                  | 8.32E-01 | 2                  | 4.27E-01 | 2                  | 4.27E-01 |
| NOL10        | 2   | 3                  | 2.87E-01 | 3                  | 2.87E-01 | 3                  | 4.27E-01 | 3                  | 4.27E-01 | 1                  | 6.96E-01 | 1                  | 6.96E-01 |
| FGD2         | 6   | 4                  | 1.35E-01 | 4                  | 1.35E-01 | 4                  | 4.27E-01 | 4                  | 4.27E-01 |                    |          |                    |          |
| PRKCDDBP     | 11  | 1                  | 3.91E-01 | 1                  | 3.91E-01 | 1                  | 4.27E-01 | 1                  | 4.27E-01 |                    |          |                    |          |
| TMEM154      | 4   | 1                  | 5.79E-01 | 1                  | 5.79E-01 | 1                  | 4.27E-01 | 1                  | 4.27E-01 | 1                  | 6.19E-01 | 1                  | 6.19E-01 |
| CTBP2        | 10  | 3                  | 5.68E-01 | 5                  | 5.84E-01 | 3                  | 4.71E-01 | 5                  | 5.02E-01 | 1                  | 4.28E-01 | 3                  | 4.72E-01 |
| FZD1         | 7   | 1                  | 7.96E-01 | 1                  | 7.96E-01 | 1                  | 4.28E-01 | 1                  | 4.28E-01 | 1                  | 4.44E-01 | 1                  | 4.44E-01 |
| PTH2R        | 2   | 2                  | 7.66E-01 | 2                  | 7.66E-01 | 2                  | 4.28E-01 | 2                  | 4.28E-01 | 2                  | 1.00E+00 | 2                  | 1.00E+00 |
| CLRN1        | 3   | 1                  | 3.99E-01 | 1                  | 3.99E-01 | 1                  | 4.28E-01 | 1                  | 4.28E-01 |                    |          |                    |          |
| SCGB1D2      | 11  | 1                  | 4.04E-01 | 1                  | 4.04E-01 | 1                  | 4.28E-01 | 1                  | 4.28E-01 |                    |          |                    |          |
| ANXA3        | 4   | 7                  | 4.18E-01 | 7                  | 4.18E-01 | 5                  | 4.28E-01 | 5                  | 4.28E-01 | 3                  | 1.00E+00 | 3                  | 1.00E+00 |
| DNAH10       | 12  | 26                 | 6.37E-01 | 26                 | 6.37E-01 | 25                 | 4.91E-01 | 25                 | 4.91E-01 | 15                 | 4.28E-01 | 15                 | 4.28E-01 |
| ALCAM        | 3   | 1                  | 8.58E-01 | 1                  | 8.58E-01 | 1                  | 4.28E-01 | 1                  | 4.28E-01 | 1                  | 6.27E-01 | 1                  | 6.27E-01 |
| MAPK12       | 22  | 3                  | 4.15E-01 | 3                  | 4.15E-01 | 3                  | 4.28E-01 | 3                  | 4.28E-01 | 1                  | 5.79E-01 | 1                  | 5.79E-01 |
| CD34         | 1   | 1                  | 4.18E-01 | 1                  | 4.18E-01 | 1                  | 4.28E-01 | 1                  | 4.28E-01 |                    |          |                    |          |
| UPP1         | 7   | 4                  | 1.16E-01 | 4                  | 1.16E-01 | 4                  | 4.28E-01 | 4                  | 4.28E-01 |                    |          |                    |          |
| CDKN1A       | 6   | 1                  | 1.53E-01 | 1                  | 1.53E-01 | 1                  | 4.29E-01 | 1                  | 4.29E-01 |                    |          |                    |          |
| TESK1        | 9   | 1                  | 8.70E-01 | 1                  | 8.70E-01 | 1                  | 4.29E-01 | 1                  | 4.29E-01 | 1                  | 7.02E-01 | 1                  | 7.02E-01 |
| LOC101927844 | 1   |                    |          | 1                  | 1.00E+00 |                    |          | 1                  | 4.35E-01 |                    |          | 1                  | 4.29E-01 |
| TRIM68       | 11  | 4                  | 1.58E-01 | 4                  | 1.58E-01 | 4                  | 4.29E-01 | 4                  | 4.29E-01 |                    |          |                    |          |
| MUL1         | 1   | 1                  | 7.91E-01 | 1                  | 7.91E-01 | 1                  | 4.29E-01 | 1                  | 4.29E-01 | 1                  | 4.52E-01 | 1                  | 4.52E-01 |

| SetID    | Chr | ADEH- vs NA        |          |                    |          | ADEH+ vs ADEH-     |          |                    |          | ADEH+ vs NA        |          |                    |          |
|----------|-----|--------------------|----------|--------------------|----------|--------------------|----------|--------------------|----------|--------------------|----------|--------------------|----------|
|          |     | rarenovel          |          | all                |          | rarenovel          |          | all                |          | rarenovel          |          | all                |          |
|          |     | N variants in test | p-value  | N variants in test | p-value  | N variants in test | p-value  | N variants in test | p-value  | N variants in test | p-value  | N variants in test | p-value  |
| MYBPHL   | 1   | 6                  | 1.00E+00 | 6                  | 1.00E+00 | 5                  | 4.78E-01 | 5                  | 4.78E-01 | 4                  | 4.29E-01 | 4                  | 4.29E-01 |
| SLC50A1  | 1   | 1                  | 4.10E-01 | 1                  | 4.10E-01 | 1                  | 4.29E-01 | 1                  | 4.29E-01 |                    |          |                    |          |
| SLAMF8   | 1   | 1                  | 4.08E-01 | 2                  | 5.36E-01 | 1                  | 4.29E-01 | 2                  | 4.37E-01 |                    |          | 1                  | 4.32E-01 |
| VRK3     | 19  | 4                  | 3.33E-01 | 4                  | 3.33E-01 | 3                  | 4.29E-01 | 3                  | 4.29E-01 | 2                  | 5.99E-01 | 2                  | 5.99E-01 |
| ZNF133   | 20  | 1                  | 3.93E-01 | 1                  | 3.93E-01 | 1                  | 4.29E-01 | 1                  | 4.29E-01 |                    |          |                    |          |
| GPR75    | 2   | 1                  | 4.14E-01 | 1                  | 4.14E-01 | 1                  | 4.29E-01 | 1                  | 4.29E-01 |                    |          |                    |          |
| ARHGEF16 | 1   | 4                  | 1.69E-01 | 4                  | 1.69E-01 | 2                  | 1.00E+00 | 2                  | 1.00E+00 | 3                  | 4.29E-01 | 3                  | 4.29E-01 |
| C3orf70  | 3   | 2                  | 1.36E-01 | 2                  | 1.36E-01 | 2                  | 4.29E-01 | 2                  | 4.29E-01 |                    |          |                    |          |
| ZSCAN32  | 16  | 3                  | 6.29E-02 | 3                  | 6.29E-02 | 1                  | 4.29E-01 | 1                  | 4.29E-01 | 2                  | 4.46E-01 | 2                  | 4.46E-01 |
| PLSCR2   | 3   | 2                  | 6.22E-01 | 2                  | 6.22E-01 | 1                  | 4.30E-01 | 1                  | 4.30E-01 | 2                  | 6.56E-01 | 2                  | 6.56E-01 |
| C16orf95 | 16  | 2                  | 3.75E-01 | 2                  | 3.75E-01 | 1                  | 4.30E-01 | 1                  | 4.30E-01 | 1                  | 5.82E-01 | 1                  | 5.82E-01 |
| CHCHD6   | 3   | 2                  | 1.70E-01 | 2                  | 1.70E-01 | 1                  | 4.30E-01 | 1                  | 4.30E-01 | 1                  | 6.48E-01 | 1                  | 6.48E-01 |
| KDELRF3  | 22  | 2                  | 3.51E-01 | 2                  | 3.51E-01 | 1                  | 4.30E-01 | 1                  | 4.30E-01 | 1                  | 6.01E-01 | 1                  | 6.01E-01 |
| SLC39A4  | 8   | 7                  | 3.43E-01 | 7                  | 3.43E-01 | 6                  | 4.30E-01 | 6                  | 4.30E-01 | 1                  | 6.55E-01 | 1                  | 6.55E-01 |
| GBP5     | 1   | 2                  | 1.00E+00 | 2                  | 1.00E+00 | 2                  | 4.30E-01 | 2                  | 4.30E-01 | 1                  | 4.54E-01 | 1                  | 4.54E-01 |
| ZNF585B  | 19  | 2                  | 3.50E-01 | 2                  | 3.50E-01 | 1                  | 4.30E-01 | 1                  | 4.30E-01 | 1                  | 6.25E-01 | 1                  | 6.25E-01 |
| PKN3     | 9   | 6                  | 1.04E-01 | 6                  | 1.04E-01 | 5                  | 5.12E-01 | 5                  | 5.12E-01 | 1                  | 4.30E-01 | 1                  | 4.30E-01 |
| FLG2     | 1   | 6                  | 6.84E-02 | 8                  | 6.26E-02 | 5                  | 4.32E-01 | 7                  | 4.30E-01 | 5                  | 5.70E-01 | 7                  | 5.68E-01 |
| TNKS1BP1 | 11  | 11                 | 9.02E-01 | 11                 | 9.02E-01 | 12                 | 4.30E-01 | 12                 | 4.30E-01 | 7                  | 5.68E-01 | 7                  | 5.68E-01 |
| FANCA    | 16  | 5                  | 6.96E-01 | 5                  | 6.96E-01 | 4                  | 4.31E-01 | 4                  | 4.31E-01 | 2                  | 6.36E-01 | 2                  | 6.36E-01 |
| RHBDF1   | 16  | 2                  | 4.48E-01 | 2                  | 4.48E-01 | 1                  | 4.31E-01 | 1                  | 4.31E-01 | 1                  | 6.92E-01 | 1                  | 6.92E-01 |
| TNFAIP2  | 14  | 1                  | 7.47E-01 | 2                  | 7.47E-01 | 1                  | 4.31E-01 | 2                  | 4.31E-01 |                    |          | 1                  | 6.94E-01 |
| IL17B    | 5   | 2                  | 3.66E-01 | 2                  | 3.66E-01 | 1                  | 4.31E-01 | 1                  | 4.31E-01 | 1                  | 6.51E-01 | 1                  | 6.51E-01 |
| P2RY6    | 11  | 1                  | 1.74E-02 | 1                  | 1.74E-02 |                    |          |                    |          | 1                  | 4.31E-01 | 1                  | 4.31E-01 |
| EPB41L3  | 18  | 7                  | 3.50E-01 | 7                  | 3.50E-01 | 6                  | 7.16E-01 | 6                  | 7.16E-01 | 2                  | 4.31E-01 | 2                  | 4.31E-01 |
| CD320    | 19  | 1                  | 1.00E+00 | 1                  | 1.00E+00 | 1                  | 4.31E-01 | 1                  | 4.31E-01 | 1                  | 6.18E-01 | 1                  | 6.18E-01 |
| AQP1     | 7   | 3                  | 5.67E-01 | 3                  | 5.67E-01 | 2                  | 4.31E-01 | 2                  | 4.31E-01 | 2                  | 1.00E+00 | 2                  | 1.00E+00 |
| LGI3     | 8   | 5                  | 4.09E-02 | 5                  | 4.09E-02 | 3                  | 7.24E-01 | 3                  | 7.24E-01 | 2                  | 4.31E-01 | 2                  | 4.31E-01 |
| DST      | 6   | 16                 | 6.87E-01 | 16                 | 6.87E-01 | 14                 | 4.31E-01 | 14                 | 4.31E-01 | 7                  | 5.79E-01 | 7                  | 5.79E-01 |
| SS18L1   | 20  | 4                  | 1.43E-01 | 4                  | 1.43E-01 | 4                  | 4.31E-01 | 4                  | 4.31E-01 |                    |          |                    |          |
| NEU4     | 2   | 2                  | 2.12E-01 | 2                  | 2.12E-01 | 2                  | 5.95E-01 | 2                  | 5.95E-01 | 2                  | 4.31E-01 | 2                  | 4.31E-01 |
| FCAMR    | 1   | 3                  | 3.49E-01 | 3                  | 3.49E-01 | 3                  | 4.31E-01 | 3                  | 4.31E-01 | 1                  | 7.02E-01 | 1                  | 7.02E-01 |
| HAVCR1   | 5   | 1                  | 7.39E-01 | 1                  | 7.39E-01 | 1                  | 1.00E+00 | 1                  | 1.00E+00 | 1                  | 4.31E-01 | 1                  | 4.31E-01 |
| BEND6    | 6   | 1                  | 9.68E-01 | 1                  | 9.68E-01 | 1                  | 4.31E-01 | 1                  | 4.31E-01 | 1                  | 6.63E-01 | 1                  | 6.63E-01 |
| DFNB59   | 2   | 1                  | 4.03E-01 | 1                  | 4.03E-01 | 1                  | 4.31E-01 | 1                  | 4.31E-01 |                    |          |                    |          |
| ANKFN1   | 17  | 5                  | 1.37E-01 | 5                  | 1.37E-01 | 4                  | 5.12E-01 | 4                  | 5.12E-01 | 1                  | 4.31E-01 | 1                  | 4.31E-01 |
| SIRPG    | 20  | 3                  | 8.13E-01 | 3                  | 8.13E-01 | 3                  | 4.51E-01 | 3                  | 4.51E-01 | 1                  | 4.31E-01 | 1                  | 4.31E-01 |
| AURKC    | 19  | 1                  | 8.78E-01 | 1                  | 8.78E-01 | 1                  | 4.31E-01 | 1                  | 4.31E-01 | 1                  | 6.98E-01 | 1                  | 6.98E-01 |
| SIGLEC7  | 19  | 1                  | 5.42E-01 | 1                  | 5.42E-01 | 1                  | 4.31E-01 | 1                  | 4.31E-01 | 1                  | 4.50E-01 | 1                  | 4.50E-01 |
| ROPN1L   | 5   | 1                  | 1.00E+00 | 1                  | 1.00E+00 | 1                  | 4.31E-01 | 1                  | 4.31E-01 | 1                  | 6.57E-01 | 1                  | 6.57E-01 |
| RSPH4A   | 6   | 2                  | 5.23E-02 | 2                  | 5.23E-02 | 1                  | 1.00E+00 | 1                  | 1.00E+00 | 2                  | 4.31E-01 | 2                  | 4.31E-01 |
| FURIN    | 15  | 1                  | 4.11E-01 | 1                  | 4.11E-01 | 1                  | 4.32E-01 | 1                  | 4.32E-01 |                    |          |                    |          |
| BBS9     | 7   | 4                  | 2.60E-01 | 4                  | 2.60E-01 | 4                  | 4.32E-01 | 4                  | 4.32E-01 | 1                  | 6.18E-01 | 1                  | 6.18E-01 |
| EPB41    | 1   | 4                  | 4.46E-01 | 4                  | 4.46E-01 | 4                  | 8.44E-01 | 4                  | 8.44E-01 | 1                  | 4.32E-01 | 1                  | 4.32E-01 |
| GRM5     | 11  | 1                  | 8.18E-01 | 1                  | 8.18E-01 | 1                  | 4.32E-01 | 1                  | 4.32E-01 | 1                  | 6.27E-01 | 1                  | 6.27E-01 |
| NOXO1    | 16  | 1                  | 7.37E-01 | 1                  | 7.37E-01 | 1                  | 4.32E-01 | 1                  | 4.32E-01 |                    |          |                    |          |
| TBC1D19  | 4   | 1                  | 7.37E-01 | 1                  | 7.37E-01 | 1                  | 4.32E-01 | 1                  | 4.32E-01 |                    |          |                    |          |
| RELA     | 11  | 1                  | 7.37E-01 | 1                  | 7.37E-01 | 1                  | 4.32E-01 | 1                  | 4.32E-01 |                    |          |                    |          |

| SetID       | Chr | ADEH- vs NA        |          |                    |          | ADEH+ vs ADEH-     |          |                    |          | ADEH+ vs NA        |          |                    |          |
|-------------|-----|--------------------|----------|--------------------|----------|--------------------|----------|--------------------|----------|--------------------|----------|--------------------|----------|
|             |     | rarenovel          |          | all                |          | rarenovel          |          | all                |          | rarenovel          |          | all                |          |
|             |     | N variants in test | p-value  | N variants in test | p-value  | N variants in test | p-value  | N variants in test | p-value  | N variants in test | p-value  | N variants in test | p-value  |
| CNOT3       | 19  | 1                  | 7.37E-01 | 1                  | 7.37E-01 | 1                  | 4.32E-01 | 1                  | 4.32E-01 |                    |          |                    |          |
| SUPT5H      | 19  | 2                  | 3.22E-01 | 2                  | 3.22E-01 | 1                  | 4.32E-01 | 1                  | 4.32E-01 | 1                  | 6.41E-01 | 1                  | 6.41E-01 |
| CCDC68      | 18  | 1                  | 6.76E-01 | 1                  | 6.76E-01 | 1                  | 4.32E-01 | 1                  | 4.32E-01 | 1                  | 5.20E-01 | 1                  | 5.20E-01 |
| CD3EAP      | 19  | 1                  | 4.05E-01 | 1                  | 4.05E-01 | 1                  | 4.32E-01 | 1                  | 4.32E-01 |                    |          |                    |          |
| C5orf42     | 5   | 11                 | 2.02E-01 | 11                 | 2.02E-01 | 11                 | 7.25E-01 | 11                 | 7.25E-01 | 4                  | 4.32E-01 | 4                  | 4.32E-01 |
| ENTPD6      | 20  | 5                  | 6.44E-01 | 5                  | 6.44E-01 | 3                  | 4.37E-01 | 3                  | 4.37E-01 | 4                  | 4.32E-01 | 4                  | 4.32E-01 |
| GMPPB       | 3   | 1                  | 2.25E-01 | 1                  | 2.25E-01 | 1                  | 4.32E-01 | 1                  | 4.32E-01 |                    |          |                    |          |
| ZNF534      | 19  | 6                  | 5.19E-01 | 6                  | 5.19E-01 | 5                  | 4.32E-01 | 5                  | 4.32E-01 | 4                  | 6.51E-01 | 4                  | 6.51E-01 |
| ENOSF1      | 18  | 4                  | 1.22E-01 | 4                  | 1.22E-01 | 4                  | 4.32E-01 | 4                  | 4.32E-01 |                    |          |                    |          |
| MLKL        | 16  | 4                  | 2.02E-01 | 4                  | 2.02E-01 | 3                  | 4.32E-01 | 3                  | 4.32E-01 | 2                  | 1.00E+00 | 2                  | 1.00E+00 |
| ZNF547      | 19  | 1                  | 2.37E-01 | 1                  | 2.37E-01 | 1                  | 4.32E-01 | 1                  | 4.32E-01 |                    |          |                    |          |
| CASC1       | 12  | 4                  | 3.41E-01 | 5                  | 3.41E-01 | 1                  | 1.00E+00 | 2                  | 1.00E+00 | 4                  | 4.32E-01 | 5                  | 4.32E-01 |
| UGT1A1      | 2   | 5                  | 1.00E+00 | 5                  | 1.00E+00 | 4                  | 4.32E-01 | 4                  | 4.32E-01 | 2                  | 4.47E-01 | 2                  | 4.47E-01 |
| HTR6        | 1   | 1                  | 8.90E-01 | 1                  | 8.90E-01 | 1                  | 4.32E-01 | 1                  | 4.32E-01 | 1                  | 6.57E-01 | 1                  | 6.57E-01 |
| REM2        | 14  | 1                  | 4.04E-01 | 1                  | 4.04E-01 | 1                  | 4.33E-01 | 1                  | 4.33E-01 |                    |          |                    |          |
| RP9         | 7   | 1                  | 7.39E-01 | 1                  | 7.39E-01 | 1                  | 4.33E-01 | 1                  | 4.33E-01 |                    |          |                    |          |
| GUCY2D      | 17  | 3                  | 1.59E-01 | 3                  | 1.59E-01 | 1                  | 4.33E-01 | 1                  | 4.33E-01 | 2                  | 6.22E-01 | 2                  | 6.22E-01 |
| ASCL1       | 12  | 2                  | 4.13E-01 | 2                  | 4.13E-01 | 1                  | 4.33E-01 | 1                  | 4.33E-01 | 1                  | 6.27E-01 | 1                  | 6.27E-01 |
| ZNF570      | 19  | 2                  | 4.05E-01 | 2                  | 4.05E-01 | 1                  | 4.33E-01 | 1                  | 4.33E-01 | 1                  | 6.29E-01 | 1                  | 6.29E-01 |
| SCHIP1      | 3   | 1                  | 7.39E-01 | 1                  | 7.39E-01 | 1                  | 4.33E-01 | 1                  | 4.33E-01 |                    |          |                    |          |
| IQCJ-SCHIP1 | 3   | 1                  | 7.39E-01 | 1                  | 7.39E-01 | 1                  | 4.33E-01 | 1                  | 4.33E-01 |                    |          |                    |          |
| ART5        | 11  | 5                  | 2.70E-01 | 5                  | 2.70E-01 | 5                  | 4.33E-01 | 5                  | 4.33E-01 | 1                  | 6.43E-01 | 1                  | 6.43E-01 |
| CARNS1      | 11  | 1                  | 9.13E-01 | 1                  | 9.13E-01 | 1                  | 4.33E-01 | 1                  | 4.33E-01 | 1                  | 6.47E-01 | 1                  | 6.47E-01 |
| TMEM200C    | 18  | 4                  | 1.51E-01 | 4                  | 1.51E-01 | 1                  | 4.33E-01 | 1                  | 4.33E-01 | 3                  | 5.24E-01 | 3                  | 5.24E-01 |
| ZNF853      | 7   |                    |          | 1                  | 1.88E-01 |                    |          | 1                  | 4.33E-01 |                    |          | 1                  | 8.87E-01 |
| BIRC8       | 19  | 2                  | 5.56E-01 | 2                  | 5.56E-01 | 2                  | 4.33E-01 | 2                  | 4.33E-01 | 1                  | 6.52E-01 | 1                  | 6.52E-01 |
| ADAM7       | 8   | 1                  | 7.71E-01 | 2                  | 1.00E+00 | 1                  | 4.98E-01 | 2                  | 4.95E-01 | 1                  | 4.34E-01 | 2                  | 4.33E-01 |
| FOXP1       | 3   | 1                  | 9.26E-01 | 1                  | 9.26E-01 | 1                  | 4.33E-01 | 1                  | 4.33E-01 | 1                  | 6.16E-01 | 1                  | 6.16E-01 |
| IL12RB1     | 19  | 1                  | 3.97E-01 | 1                  | 3.97E-01 | 1                  | 4.33E-01 | 1                  | 4.33E-01 |                    |          |                    |          |
| TTL9        | 20  | 2                  | 3.98E-01 | 2                  | 3.98E-01 | 2                  | 4.33E-01 | 2                  | 4.33E-01 | 1                  | 5.63E-01 | 1                  | 5.63E-01 |
| MPST        | 22  | 2                  | 8.63E-01 | 2                  | 8.63E-01 | 2                  | 4.69E-01 | 2                  | 4.69E-01 | 2                  | 4.33E-01 | 2                  | 4.33E-01 |
| LYZ         | 12  | 1                  | 5.17E-01 | 1                  | 5.17E-01 | 1                  | 5.95E-01 | 1                  | 5.95E-01 | 1                  | 4.34E-01 | 1                  | 4.34E-01 |
| PGBD1       | 6   | 5                  | 5.98E-01 | 5                  | 5.98E-01 | 4                  | 4.34E-01 | 4                  | 4.34E-01 | 2                  | 6.21E-01 | 2                  | 6.21E-01 |
| ZNF337      | 20  | 3                  | 4.84E-02 | 4                  | 4.58E-01 | 2                  | 6.27E-01 | 3                  | 1.00E+00 | 1                  | 4.34E-01 | 2                  | 6.60E-01 |
| PLXNA4      | 7   | 2                  | 3.49E-01 | 2                  | 3.49E-01 | 1                  | 4.34E-01 | 1                  | 4.34E-01 | 1                  | 6.01E-01 | 1                  | 6.01E-01 |
| MRS2        | 6   | 1                  | 4.13E-01 | 1                  | 4.13E-01 | 1                  | 4.34E-01 | 1                  | 4.34E-01 |                    |          |                    |          |
| C15orf32    | 15  | 1                  | 7.28E-01 | 1                  | 7.28E-01 | 1                  | 4.34E-01 | 1                  | 4.34E-01 |                    |          |                    |          |
| SHC3        | 9   | 3                  | 1.33E-01 | 3                  | 1.33E-01 | 1                  | 4.34E-01 | 1                  | 4.34E-01 | 2                  | 6.37E-01 | 2                  | 6.37E-01 |
| UGT2B4      | 4   | 3                  | 6.78E-02 | 3                  | 6.78E-02 | 1                  | 4.34E-01 | 1                  | 4.34E-01 | 3                  | 5.05E-01 | 3                  | 5.05E-01 |
| NAGK        | 2   | 2                  | 5.00E-02 | 2                  | 5.00E-02 | 1                  | 4.34E-01 | 1                  | 4.34E-01 | 2                  | 4.82E-01 | 2                  | 4.82E-01 |
| MBTD1       | 17  | 1                  | 7.28E-01 | 1                  | 7.28E-01 | 1                  | 4.34E-01 | 1                  | 4.34E-01 |                    |          |                    |          |
| CCDC127     | 5   | 1                  | 7.28E-01 | 1                  | 7.28E-01 | 1                  | 4.34E-01 | 1                  | 4.34E-01 |                    |          |                    |          |
| DNAJC5      | 20  | 1                  | 7.28E-01 | 1                  | 7.28E-01 | 1                  | 4.34E-01 | 1                  | 4.34E-01 |                    |          |                    |          |
| DHX57       | 2   | 1                  | 7.45E-01 | 1                  | 7.45E-01 | 1                  | 4.34E-01 | 1                  | 4.34E-01 |                    |          |                    |          |
| UHRF1BP1L   | 12  | 2                  | 3.69E-01 | 2                  | 3.69E-01 | 1                  | 4.34E-01 | 1                  | 4.34E-01 | 1                  | 6.68E-01 | 1                  | 6.68E-01 |
| NAAA        | 4   | 2                  | 2.97E-01 | 2                  | 2.97E-01 | 1                  | 4.34E-01 | 1                  | 4.34E-01 | 2                  | 6.53E-01 | 2                  | 6.53E-01 |
| ZDHHC3      | 3   | 1                  | 7.45E-01 | 1                  | 7.45E-01 | 1                  | 4.34E-01 | 1                  | 4.34E-01 |                    |          |                    |          |
| CWH43       | 4   | 2                  | 5.12E-01 | 2                  | 5.12E-01 | 1                  | 4.34E-01 | 1                  | 4.34E-01 | 1                  | 6.53E-01 | 1                  | 6.53E-01 |

| SetID     | Chr | ADEH- vs NA        |          |                    |          | ADEH+ vs ADEH-     |          |                    |          | ADEH+ vs NA        |          |                    |          |
|-----------|-----|--------------------|----------|--------------------|----------|--------------------|----------|--------------------|----------|--------------------|----------|--------------------|----------|
|           |     | rarenovel          |          | all                |          | rarenovel          |          | all                |          | rarenovel          |          | all                |          |
|           |     | N variants in test | p-value  | N variants in test | p-value  | N variants in test | p-value  | N variants in test | p-value  | N variants in test | p-value  | N variants in test | p-value  |
| LOXL1     | 15  | 2                  | 4.60E-01 | 2                  | 4.60E-01 | 1                  | 4.34E-01 | 1                  | 4.34E-01 | 1                  | 6.36E-01 | 1                  | 6.36E-01 |
| RNF182    | 6   | 1                  | 7.45E-01 | 1                  | 7.45E-01 | 1                  | 4.34E-01 | 1                  | 4.34E-01 |                    |          |                    |          |
| WRB       | 21  | 1                  | 6.58E-01 | 1                  | 6.58E-01 | 1                  | 4.34E-01 | 1                  | 4.34E-01 | 1                  | 6.28E-01 | 1                  | 6.28E-01 |
| PGBD4     | 15  | 1                  | 4.13E-01 | 1                  | 4.13E-01 | 1                  | 4.34E-01 | 1                  | 4.34E-01 |                    |          |                    |          |
| PTER      | 10  | 4                  | 4.19E-01 | 4                  | 4.19E-01 | 4                  | 4.34E-01 | 4                  | 4.34E-01 | 1                  | 5.63E-01 | 1                  | 5.63E-01 |
| C1orf101  | 1   | 4                  | 9.54E-02 | 4                  | 9.54E-02 | 3                  | 6.28E-01 | 3                  | 6.28E-01 | 1                  | 4.34E-01 | 1                  | 4.34E-01 |
| SYPL1     | 7   | 1                  | 4.05E-01 | 1                  | 4.05E-01 | 1                  | 4.34E-01 | 1                  | 4.34E-01 |                    |          |                    |          |
| EIF4G1    | 3   | 3                  | 4.20E-01 | 3                  | 4.20E-01 | 3                  | 6.36E-01 | 3                  | 6.36E-01 | 1                  | 4.34E-01 | 1                  | 4.34E-01 |
| ATP13A5   | 3   | 8                  | 2.59E-01 | 9                  | 1.73E-01 | 7                  | 4.58E-01 | 8                  | 4.34E-01 | 4                  | 6.77E-01 | 5                  | 9.03E-01 |
| OR8B12    | 11  | 1                  | 7.34E-01 | 1                  | 7.34E-01 | 1                  | 4.34E-01 | 1                  | 4.34E-01 |                    |          |                    |          |
| GGT5      | 22  | 1                  | 7.34E-01 | 1                  | 7.34E-01 | 1                  | 4.34E-01 | 1                  | 4.34E-01 |                    |          |                    |          |
| TSPAN11   | 12  | 1                  | 7.34E-01 | 1                  | 7.34E-01 | 1                  | 4.34E-01 | 1                  | 4.34E-01 |                    |          |                    |          |
| INTS8     | 8   | 4                  | 5.12E-02 | 4                  | 5.12E-02 | 1                  | 4.34E-01 | 1                  | 4.34E-01 | 3                  | 5.10E-01 | 3                  | 5.10E-01 |
| TMEM176A  | 7   | 1                  | 6.42E-01 | 2                  | 6.78E-01 | 1                  | 4.34E-01 | 2                  | 4.93E-01 | 1                  | 6.49E-01 | 2                  | 6.97E-01 |
| RNH1      | 11  | 1                  | 7.34E-01 | 1                  | 7.34E-01 | 1                  | 4.34E-01 | 1                  | 4.34E-01 |                    |          |                    |          |
| PEX10     | 1   | 1                  | 7.34E-01 | 1                  | 7.34E-01 | 1                  | 4.34E-01 | 1                  | 4.34E-01 |                    |          |                    |          |
| PCDHGA3   | 5   | 2                  | 2.99E-01 | 2                  | 2.99E-01 | 1                  | 4.34E-01 | 1                  | 4.34E-01 | 2                  | 6.33E-01 | 2                  | 6.33E-01 |
| IL20RA    | 6   | 2                  | 3.58E-01 | 2                  | 3.58E-01 | 1                  | 4.34E-01 | 1                  | 4.34E-01 | 1                  | 6.18E-01 | 1                  | 6.18E-01 |
| C20orf202 | 20  | 1                  | 7.34E-01 | 1                  | 7.34E-01 | 1                  | 4.34E-01 | 1                  | 4.34E-01 |                    |          |                    |          |
| HMP19     | 5   | 1                  | 7.34E-01 | 1                  | 7.34E-01 | 1                  | 4.34E-01 | 1                  | 4.34E-01 |                    |          |                    |          |
| PSPC1     | 13  | 1                  | 7.34E-01 | 1                  | 7.34E-01 | 1                  | 4.34E-01 | 1                  | 4.34E-01 |                    |          |                    |          |
| STK16     | 2   | 3                  | 1.16E-01 | 3                  | 1.16E-01 | 3                  | 4.34E-01 | 3                  | 4.34E-01 |                    |          |                    |          |
| ELP6      | 3   | 3                  | 2.06E-01 | 3                  | 2.06E-01 | 2                  | 4.34E-01 | 2                  | 4.34E-01 | 1                  | 6.12E-01 | 1                  | 6.12E-01 |
| TGFB1I1   | 16  | 1                  | 4.09E-01 | 1                  | 4.09E-01 | 1                  | 4.34E-01 | 1                  | 4.34E-01 |                    |          |                    |          |
| PMP22     | 17  | 2                  | 1.00E+00 | 2                  | 1.00E+00 | 2                  | 4.34E-01 | 2                  | 4.34E-01 | 1                  | 4.46E-01 | 1                  | 4.46E-01 |
| SLC46A2   | 9   | 2                  | 1.00E+00 | 2                  | 1.00E+00 | 2                  | 4.36E-01 | 2                  | 4.36E-01 | 1                  | 4.34E-01 | 1                  | 4.34E-01 |
| DYNC2H1   | 11  | 10                 | 4.60E-01 | 10                 | 4.60E-01 | 10                 | 6.12E-01 | 10                 | 6.12E-01 | 4                  | 4.34E-01 | 4                  | 4.34E-01 |
| CCDC34    | 11  | 5                  | 9.70E-03 | 5                  | 9.70E-03 | 1                  | 5.13E-01 | 1                  | 5.13E-01 | 4                  | 4.34E-01 | 4                  | 4.34E-01 |
| PLA2G4D   | 15  | 6                  | 1.32E-01 | 6                  | 1.32E-01 | 2                  | 7.21E-01 | 2                  | 7.21E-01 | 4                  | 4.35E-01 | 4                  | 4.35E-01 |
| CPE       | 4   | 2                  | 3.66E-01 | 2                  | 3.66E-01 | 1                  | 4.35E-01 | 1                  | 4.35E-01 | 1                  | 6.45E-01 | 1                  | 6.45E-01 |
| CH25H     | 10  | 1                  | 7.39E-01 | 1                  | 7.39E-01 | 1                  | 4.35E-01 | 1                  | 4.35E-01 |                    |          |                    |          |
| FOXL1     | 16  | 1                  | 7.39E-01 | 1                  | 7.39E-01 | 1                  | 4.35E-01 | 1                  | 4.35E-01 |                    |          |                    |          |
| HN1L      | 16  | 1                  | 7.39E-01 | 1                  | 7.39E-01 | 1                  | 4.35E-01 | 1                  | 4.35E-01 |                    |          |                    |          |
| ARL14     | 3   | 1                  | 7.39E-01 | 1                  | 7.39E-01 | 1                  | 4.35E-01 | 1                  | 4.35E-01 |                    |          |                    |          |
| UNC119B   | 12  | 1                  | 7.39E-01 | 1                  | 7.39E-01 | 1                  | 4.35E-01 | 1                  | 4.35E-01 |                    |          |                    |          |
| NPHS2     | 1   | 1                  | 4.18E-01 | 1                  | 4.18E-01 | 1                  | 4.35E-01 | 1                  | 4.35E-01 |                    |          |                    |          |
| TACC3     | 4   | 1                  | 3.97E-01 | 1                  | 3.97E-01 | 1                  | 4.35E-01 | 1                  | 4.35E-01 |                    |          |                    |          |
| TULP1     | 6   | 2                  | 7.13E-01 | 2                  | 7.13E-01 | 2                  | 5.93E-01 | 2                  | 5.93E-01 | 1                  | 4.35E-01 | 1                  | 4.35E-01 |
| SLFN11    | 17  | 2                  | 3.23E-01 | 2                  | 3.23E-01 | 2                  | 6.40E-01 | 2                  | 6.40E-01 | 1                  | 4.35E-01 | 1                  | 4.35E-01 |
| TDRD5     | 1   | 1                  | 8.68E-01 | 1                  | 8.68E-01 | 1                  | 4.35E-01 | 1                  | 4.35E-01 | 1                  | 4.54E-01 | 1                  | 4.54E-01 |
| DNAJB11   | 3   | 1                  | 7.39E-01 | 1                  | 7.39E-01 | 1                  | 4.35E-01 | 1                  | 4.35E-01 |                    |          |                    |          |
| GALNT18   | 11  | 1                  | 7.39E-01 | 1                  | 7.39E-01 | 1                  | 4.35E-01 | 1                  | 4.35E-01 |                    |          |                    |          |
| C2orf44   | 2   | 2                  | 4.62E-01 | 2                  | 4.62E-01 | 1                  | 4.35E-01 | 1                  | 4.35E-01 | 1                  | 7.02E-01 | 1                  | 7.02E-01 |
| CHRNB3    | 8   | 1                  | 7.39E-01 | 1                  | 7.39E-01 | 1                  | 4.35E-01 | 1                  | 4.35E-01 |                    |          |                    |          |
| EBPL      | 13  | 1                  | 7.39E-01 | 1                  | 7.39E-01 | 1                  | 4.35E-01 | 1                  | 4.35E-01 |                    |          |                    |          |
| SPSB4     | 3   | 1                  | 7.39E-01 | 1                  | 7.39E-01 | 1                  | 4.35E-01 | 1                  | 4.35E-01 |                    |          |                    |          |
| ZDHHC1    | 16  | 1                  | 4.02E-01 | 1                  | 4.02E-01 | 1                  | 4.35E-01 | 1                  | 4.35E-01 |                    |          |                    |          |
| DNAJC6    | 1   | 2                  | 4.51E-01 | 2                  | 4.51E-01 | 1                  | 4.35E-01 | 1                  | 4.35E-01 | 1                  | 5.92E-01 | 1                  | 5.92E-01 |

| SetID     | Chr | ADEH- vs NA        |          |                    |          | ADEH+ vs ADEH-     |          |                    |          | ADEH+ vs NA        |          |                    |          |
|-----------|-----|--------------------|----------|--------------------|----------|--------------------|----------|--------------------|----------|--------------------|----------|--------------------|----------|
|           |     | rarenovel          |          | all                |          | rarenovel          |          | all                |          | rarenovel          |          | all                |          |
|           |     | N variants in test | p-value  | N variants in test | p-value  | N variants in test | p-value  | N variants in test | p-value  | N variants in test | p-value  | N variants in test | p-value  |
| OPN5      | 6   | 1                  | 7.39E-01 | 1                  | 7.39E-01 | 1                  | 4.35E-01 | 1                  | 4.35E-01 |                    |          |                    |          |
| RASGRF1   | 15  | 2                  | 4.92E-01 | 2                  | 4.92E-01 | 1                  | 4.35E-01 | 1                  | 4.35E-01 | 1                  | 6.22E-01 | 1                  | 6.22E-01 |
| SFTPD     | 10  | 2                  | 4.32E-01 | 2                  | 4.32E-01 | 1                  | 4.35E-01 | 1                  | 4.35E-01 | 1                  | 6.06E-01 | 1                  | 6.06E-01 |
| KRTAP4-1  | 17  | 1                  | 7.39E-01 | 1                  | 7.39E-01 | 1                  | 4.35E-01 | 1                  | 4.35E-01 |                    |          |                    |          |
| BIRC2     | 11  | 1                  | 7.39E-01 | 1                  | 7.39E-01 | 1                  | 4.35E-01 | 1                  | 4.35E-01 |                    |          |                    |          |
| DNAAF3    | 19  | 1                  | 7.39E-01 | 1                  | 7.39E-01 | 1                  | 4.35E-01 | 1                  | 4.35E-01 |                    |          |                    |          |
| LEKR1     | 3   | 1                  | 7.39E-01 | 1                  | 7.39E-01 | 1                  | 4.35E-01 | 1                  | 4.35E-01 |                    |          |                    |          |
| MPDZ      | 9   | 13                 | 8.60E-01 | 13                 | 8.60E-01 | 12                 | 4.35E-01 | 12                 | 4.35E-01 | 6                  | 7.22E-01 | 6                  | 7.22E-01 |
| BDNF      | 11  | 1                  | 2.20E-01 | 2                  | 2.27E-01 | 1                  | 5.10E-01 | 2                  | 5.38E-01 | 1                  | 4.79E-01 | 2                  | 4.35E-01 |
| TCTN3     | 10  | 3                  | 4.48E-02 | 3                  | 4.48E-02 | 2                  | 6.27E-01 | 2                  | 6.27E-01 | 1                  | 4.35E-01 | 1                  | 4.35E-01 |
| TSGA13    | 7   | 1                  | 4.11E-01 | 1                  | 4.11E-01 | 1                  | 4.36E-01 | 1                  | 4.36E-01 |                    |          |                    |          |
| RASA3     | 13  | 4                  | 4.28E-01 | 4                  | 4.28E-01 | 2                  | 5.30E-01 | 2                  | 5.30E-01 | 3                  | 4.36E-01 | 3                  | 4.36E-01 |
| SMAD2     | 18  | 1                  | 4.20E-01 | 1                  | 4.20E-01 | 1                  | 4.36E-01 | 1                  | 4.36E-01 |                    |          |                    |          |
| SOX13     | 1   | 4                  | 7.30E-01 | 4                  | 7.30E-01 | 4                  | 5.81E-01 | 4                  | 5.81E-01 | 2                  | 4.36E-01 | 2                  | 4.36E-01 |
| PAFAH2    | 1   | 7                  | 7.52E-01 | 7                  | 7.52E-01 | 5                  | 8.26E-01 | 5                  | 8.26E-01 | 3                  | 4.36E-01 | 3                  | 4.36E-01 |
| SCYL1     | 11  | 5                  | 7.69E-01 | 5                  | 7.69E-01 | 3                  | 4.36E-01 | 3                  | 4.36E-01 | 3                  | 4.47E-01 | 3                  | 4.47E-01 |
| CCDC153   | 11  | 1                  | 7.20E-01 | 1                  | 7.20E-01 | 1                  | 4.36E-01 | 1                  | 4.36E-01 | 1                  | 4.56E-01 | 1                  | 4.56E-01 |
| SIRT4     | 12  | 4                  | 2.40E-01 | 4                  | 2.40E-01 | 3                  | 4.36E-01 | 3                  | 4.36E-01 | 1                  | 6.71E-01 | 1                  | 6.71E-01 |
| OVCH1     | 12  | 6                  | 5.83E-01 | 7                  | 4.03E-01 | 5                  | 5.07E-01 | 6                  | 4.36E-01 | 1                  | 6.27E-01 | 2                  | 7.44E-01 |
| PRUNE     | 1   | 3                  | 1.00E+00 | 3                  | 1.00E+00 | 3                  | 4.36E-01 | 3                  | 4.36E-01 | 2                  | 6.20E-01 | 2                  | 6.20E-01 |
| ATP4B     | 13  | 2                  | 5.06E-01 | 2                  | 5.06E-01 | 2                  | 4.36E-01 | 2                  | 4.36E-01 | 1                  | 5.82E-01 | 1                  | 5.82E-01 |
| ALDH1L2   | 12  | 5                  | 5.12E-01 | 5                  | 5.12E-01 | 5                  | 4.36E-01 | 5                  | 4.36E-01 | 1                  | 4.50E-01 | 1                  | 4.50E-01 |
| AGAP2     | 12  | 3                  | 1.00E+00 | 3                  | 1.00E+00 | 3                  | 4.71E-01 | 3                  | 4.71E-01 | 2                  | 4.36E-01 | 2                  | 4.36E-01 |
| OR7G3     | 19  | 1                  | 1.80E-02 | 1                  | 1.80E-02 |                    |          |                    |          | 1                  | 4.37E-01 | 1                  | 4.37E-01 |
| MLXIP     | 12  | 5                  | 1.14E-01 | 5                  | 1.14E-01 | 5                  | 4.37E-01 | 5                  | 4.37E-01 |                    |          |                    |          |
| BLOC1S1   | 12  | 1                  | 9.23E-01 | 1                  | 9.23E-01 | 1                  | 4.37E-01 | 1                  | 4.37E-01 | 1                  | 6.13E-01 | 1                  | 6.13E-01 |
| VPREB3    | 22  | 1                  | 4.08E-01 | 1                  | 4.08E-01 | 1                  | 4.37E-01 | 1                  | 4.37E-01 |                    |          |                    |          |
| RCN3      | 19  | 3                  | 3.59E-01 | 4                  | 4.62E-01 | 3                  | 4.37E-01 | 4                  | 1.00E+00 | 1                  | 6.31E-01 | 2                  | 8.17E-01 |
| HCRT      | 17  | 1                  | 1.69E-01 | 1                  | 1.69E-01 | 1                  | 4.73E-01 | 1                  | 4.73E-01 | 1                  | 4.37E-01 | 1                  | 4.37E-01 |
| UTP14C    | 13  | 3                  | 5.63E-01 | 4                  | 2.79E-01 | 3                  | 5.16E-01 | 4                  | 4.37E-01 | 1                  | 6.44E-01 | 2                  | 8.63E-01 |
| TMPRSS5   | 11  | 3                  | 4.59E-02 | 3                  | 4.59E-02 | 2                  | 6.28E-01 | 2                  | 6.28E-01 | 1                  | 4.37E-01 | 1                  | 4.37E-01 |
| GPR162    | 12  | 1                  | 4.08E-01 | 1                  | 4.08E-01 | 1                  | 4.37E-01 | 1                  | 4.37E-01 |                    |          |                    |          |
| MAML2     | 11  | 5                  | 3.61E-01 | 5                  | 3.61E-01 | 3                  | 4.37E-01 | 3                  | 4.37E-01 | 3                  | 5.57E-01 | 3                  | 5.57E-01 |
| GBP7      | 1   | 3                  | 1.00E+00 | 3                  | 1.00E+00 | 3                  | 4.37E-01 | 3                  | 4.37E-01 | 1                  | 4.57E-01 | 1                  | 4.57E-01 |
| TBC1D2B   | 15  | 3                  | 8.53E-02 | 3                  | 8.53E-02 | 1                  | 4.37E-01 | 1                  | 4.37E-01 | 2                  | 6.43E-01 | 2                  | 6.43E-01 |
| TP63      | 3   | 1                  | 7.50E-01 | 1                  | 7.50E-01 | 1                  | 4.37E-01 | 1                  | 4.37E-01 |                    |          |                    |          |
| OAF       | 11  | 2                  | 4.19E-01 | 2                  | 4.19E-01 | 1                  | 4.37E-01 | 1                  | 4.37E-01 | 1                  | 6.51E-01 | 1                  | 6.51E-01 |
| CDKN1C    | 11  | 1                  | 7.50E-01 | 1                  | 7.50E-01 | 1                  | 4.37E-01 | 1                  | 4.37E-01 |                    |          |                    |          |
| KRTAP19-8 | 21  | 1                  | 7.36E-01 | 1                  | 7.36E-01 | 1                  | 4.37E-01 | 1                  | 4.37E-01 |                    |          |                    |          |
| CCNE2     | 8   | 1                  | 7.36E-01 | 1                  | 7.36E-01 | 1                  | 4.37E-01 | 1                  | 4.37E-01 |                    |          |                    |          |
| MSL2      | 3   | 1                  | 7.36E-01 | 1                  | 7.36E-01 | 1                  | 4.37E-01 | 1                  | 4.37E-01 |                    |          |                    |          |
| ZBTB10    | 8   | 1                  | 7.36E-01 | 1                  | 7.36E-01 | 1                  | 4.37E-01 | 1                  | 4.37E-01 |                    |          |                    |          |
| EHD4      | 15  | 3                  | 1.65E-01 | 3                  | 1.65E-01 | 1                  | 4.37E-01 | 1                  | 4.37E-01 | 2                  | 6.30E-01 | 2                  | 6.30E-01 |
| UBA6      | 4   | 2                  | 4.86E-01 | 2                  | 4.86E-01 | 1                  | 4.37E-01 | 1                  | 4.37E-01 | 1                  | 6.23E-01 | 1                  | 6.23E-01 |
| HSPB3     | 5   | 1                  | 7.36E-01 | 1                  | 7.36E-01 | 1                  | 4.37E-01 | 1                  | 4.37E-01 |                    |          |                    |          |
| ATF7      | 12  | 1                  | 7.36E-01 | 1                  | 7.36E-01 | 1                  | 4.37E-01 | 1                  | 4.37E-01 |                    |          |                    |          |
| PLCXD2    | 3   | 1                  | 4.16E-01 | 1                  | 4.16E-01 | 1                  | 4.37E-01 | 1                  | 4.37E-01 |                    |          |                    |          |
| HRCT1     | 9   | 1                  | 7.42E-01 | 2                  | 7.96E-01 | 1                  | 4.37E-01 | 2                  | 4.64E-01 |                    |          | 1                  | 5.11E-01 |

| SetID     | Chr | ADEH- vs NA        |          |                    |          | ADEH+ vs ADEH-     |          |                    |          | ADEH+ vs NA        |          |                    |          |
|-----------|-----|--------------------|----------|--------------------|----------|--------------------|----------|--------------------|----------|--------------------|----------|--------------------|----------|
|           |     | rare novel         |          | all                |          | rare novel         |          | all                |          | rare novel         |          | all                |          |
|           |     | N variants in test | p-value  | N variants in test | p-value  | N variants in test | p-value  | N variants in test | p-value  | N variants in test | p-value  | N variants in test | p-value  |
| MKRN2     | 3   | 1                  | 7.42E-01 | 1                  | 7.42E-01 | 1                  | 4.37E-01 | 1                  | 4.37E-01 |                    |          |                    |          |
| RHBDD2    | 7   | 1                  | 7.42E-01 | 1                  | 7.42E-01 | 1                  | 4.37E-01 | 1                  | 4.37E-01 |                    |          |                    |          |
| PPP2R5C   | 14  | 1                  | 2.15E-01 | 1                  | 2.15E-01 | 1                  | 5.28E-01 | 1                  | 5.28E-01 | 1                  | 4.37E-01 | 1                  | 4.37E-01 |
| PODXL     | 7   | 1                  | 5.51E-01 | 1                  | 5.51E-01 | 1                  | 4.66E-01 | 1                  | 4.66E-01 | 1                  | 4.37E-01 | 1                  | 4.37E-01 |
| PSMB8     | 6   | 1                  | 4.19E-01 | 1                  | 4.19E-01 | 1                  | 1.00E+00 | 1                  | 1.00E+00 | 1                  | 4.37E-01 | 1                  | 4.37E-01 |
| PSEN1     | 14  | 1                  | 4.08E-01 | 1                  | 4.08E-01 | 1                  | 4.37E-01 | 1                  | 4.37E-01 |                    |          |                    |          |
| MESP2     | 15  | 3                  | 2.30E-01 | 3                  | 2.30E-01 | 1                  | 4.38E-01 | 1                  | 4.38E-01 | 2                  | 6.39E-01 | 2                  | 6.39E-01 |
| NETO2     | 16  | 2                  | 3.61E-01 | 2                  | 3.61E-01 | 1                  | 4.38E-01 | 1                  | 4.38E-01 | 1                  | 6.37E-01 | 1                  | 6.37E-01 |
| C1orf109  | 1   | 1                  | 4.13E-01 | 1                  | 4.13E-01 | 1                  | 4.38E-01 | 1                  | 4.38E-01 |                    |          |                    |          |
| SLC25A34  | 1   | 1                  | 4.46E-01 | 1                  | 4.46E-01 | 1                  | 4.40E-01 | 1                  | 4.40E-01 | 1                  | 4.38E-01 | 1                  | 4.38E-01 |
| SYNE2     | 14  | 19                 | 1.53E-01 | 19                 | 1.53E-01 | 14                 | 6.26E-01 | 14                 | 6.26E-01 | 10                 | 4.38E-01 | 10                 | 4.38E-01 |
| ZNF318    | 6   | 9                  | 3.24E-01 | 9                  | 3.24E-01 | 6                  | 4.38E-01 | 6                  | 4.38E-01 | 5                  | 6.01E-01 | 5                  | 6.01E-01 |
| SH3BP1    | 22  | 1                  | 9.67E-01 | 1                  | 9.67E-01 | 1                  | 4.38E-01 | 1                  | 4.38E-01 | 1                  | 6.16E-01 | 1                  | 6.16E-01 |
| VOPP1     | 7   | 2                  | 3.24E-01 | 2                  | 3.24E-01 | 1                  | 4.38E-01 | 1                  | 4.38E-01 | 1                  | 6.18E-01 | 1                  | 6.18E-01 |
| UNC93A    | 6   | 5                  | 8.50E-01 | 6                  | 7.46E-01 | 4                  | 4.56E-01 | 5                  | 4.38E-01 | 5                  | 5.98E-01 | 6                  | 6.29E-01 |
| DUSP2     | 2   | 1                  | 7.43E-01 | 1                  | 7.43E-01 | 1                  | 1.00E+00 | 1                  | 1.00E+00 | 1                  | 4.38E-01 | 1                  | 4.38E-01 |
| GLI3      | 7   | 5                  | 7.14E-01 | 5                  | 7.14E-01 | 5                  | 4.38E-01 | 5                  | 4.38E-01 | 3                  | 7.06E-01 | 3                  | 7.06E-01 |
| VWA5A     | 11  | 8                  | 6.92E-01 | 8                  | 6.92E-01 | 7                  | 4.38E-01 | 7                  | 4.38E-01 | 3                  | 7.18E-01 | 3                  | 7.18E-01 |
| BCAM      | 19  | 9                  | 7.07E-01 | 9                  | 7.07E-01 | 7                  | 4.38E-01 | 7                  | 4.38E-01 | 2                  | 6.40E-01 | 2                  | 6.40E-01 |
| KLHL38    | 8   | 3                  | 8.27E-01 | 4                  | 8.39E-01 | 2                  | 6.94E-01 | 3                  | 4.38E-01 | 2                  | 6.43E-01 | 3                  | 5.02E-01 |
| PIK3AP1   | 10  | 3                  | 2.28E-01 | 3                  | 2.28E-01 | 1                  | 1.00E+00 | 1                  | 1.00E+00 | 3                  | 4.38E-01 | 3                  | 4.38E-01 |
| FBXO7     | 22  | 2                  | 2.95E-01 | 2                  | 2.95E-01 | 2                  | 5.90E-01 | 2                  | 5.90E-01 | 1                  | 4.38E-01 | 1                  | 4.38E-01 |
| PEPD      | 19  | 7                  | 6.12E-01 | 7                  | 6.12E-01 | 6                  | 4.38E-01 | 6                  | 4.38E-01 | 4                  | 4.77E-01 | 4                  | 4.77E-01 |
| CLEC2D    | 12  | 1                  | 4.04E-01 | 1                  | 4.04E-01 | 1                  | 4.38E-01 | 1                  | 4.38E-01 |                    |          |                    |          |
| PANK1     | 10  | 1                  | 4.07E-01 | 1                  | 4.07E-01 | 1                  | 4.38E-01 | 1                  | 4.38E-01 |                    |          |                    |          |
| ZBTB17    | 1   | 1                  | 4.17E-01 | 1                  | 4.17E-01 | 1                  | 4.38E-01 | 1                  | 4.38E-01 |                    |          |                    |          |
| COL15A1   | 9   | 7                  | 1.46E-01 | 8                  | 1.48E-01 | 6                  | 6.39E-01 | 7                  | 7.32E-01 | 3                  | 4.51E-01 | 4                  | 4.38E-01 |
| WIPF1     | 2   | 1                  | 3.99E-01 | 1                  | 3.99E-01 | 1                  | 4.39E-01 | 1                  | 4.39E-01 |                    |          |                    |          |
| TLR5      | 1   | 3                  | 6.60E-01 | 4                  | 8.13E-01 | 3                  | 6.97E-01 | 4                  | 1.00E+00 | 1                  | 4.39E-01 | 2                  | 7.60E-01 |
| TNFAIP8L1 | 19  | 1                  | 4.15E-01 | 1                  | 4.15E-01 | 1                  | 4.39E-01 | 1                  | 4.39E-01 |                    |          |                    |          |
| HN1       | 17  | 2                  | 3.00E-01 | 2                  | 3.00E-01 | 2                  | 5.70E-01 | 2                  | 5.70E-01 | 1                  | 4.39E-01 | 1                  | 4.39E-01 |
| CPB1      | 3   | 3                  | 8.32E-02 | 3                  | 8.32E-02 | 2                  | 7.55E-01 | 2                  | 7.55E-01 | 1                  | 4.39E-01 | 1                  | 4.39E-01 |
| EPHB1     | 3   | 2                  | 6.90E-01 | 2                  | 6.90E-01 | 2                  | 6.11E-01 | 2                  | 6.11E-01 | 1                  | 4.39E-01 | 1                  | 4.39E-01 |
| SLC22A7   | 6   | 1                  | 4.07E-01 | 1                  | 4.07E-01 | 1                  | 4.39E-01 | 1                  | 4.39E-01 |                    |          |                    |          |
| ZNF681    | 19  | 5                  | 8.27E-01 | 6                  | 7.66E-01 | 4                  | 4.39E-01 | 5                  | 5.19E-01 | 2                  | 6.38E-01 | 3                  | 8.64E-01 |
| ERN2      | 16  | 5                  | 8.63E-02 | 5                  | 8.63E-02 | 2                  | 6.42E-01 | 2                  | 6.42E-01 | 4                  | 4.39E-01 | 4                  | 4.39E-01 |
| ASB10     | 7   | 6                  | 5.61E-01 | 6                  | 5.61E-01 | 5                  | 4.40E-01 | 5                  | 4.40E-01 | 2                  | 6.38E-01 | 2                  | 6.38E-01 |
| GCN1      | 12  | 9                  | 4.21E-01 | 9                  | 4.21E-01 | 8                  | 4.40E-01 | 8                  | 4.40E-01 | 4                  | 4.44E-01 | 4                  | 4.44E-01 |
| CHRN2     | 1   | 1                  | 4.09E-01 | 1                  | 4.09E-01 | 1                  | 4.40E-01 | 1                  | 4.40E-01 |                    |          |                    |          |
| HOXD1     | 2   | 1                  | 7.36E-01 | 1                  | 7.36E-01 | 1                  | 4.40E-01 | 1                  | 4.40E-01 |                    |          |                    |          |
| MAP3K2    | 2   | 2                  | 5.38E-01 | 2                  | 5.38E-01 | 1                  | 4.40E-01 | 1                  | 4.40E-01 | 1                  | 6.12E-01 | 1                  | 6.12E-01 |
| TMEM200A  | 6   | 3                  | 1.30E-01 | 3                  | 1.30E-01 | 1                  | 4.40E-01 | 1                  | 4.40E-01 | 2                  | 6.40E-01 | 2                  | 6.40E-01 |
| ATG5      | 6   | 1                  | 7.36E-01 | 1                  | 7.36E-01 | 1                  | 4.40E-01 | 1                  | 4.40E-01 |                    |          |                    |          |
| SHISA2    | 13  | 1                  | 7.36E-01 | 1                  | 7.36E-01 | 1                  | 4.40E-01 | 1                  | 4.40E-01 |                    |          |                    |          |
| IL36RN    | 2   | 1                  | 7.98E-01 | 1                  | 7.98E-01 | 1                  | 4.40E-01 | 1                  | 4.40E-01 | 1                  | 6.72E-01 | 1                  | 6.72E-01 |
| CAMTA2    | 17  | 3                  | 5.06E-01 | 3                  | 5.06E-01 | 3                  | 7.70E-01 | 3                  | 7.70E-01 | 2                  | 4.40E-01 | 2                  | 4.40E-01 |
| PHYH      | 10  | 5                  | 4.74E-02 | 5                  | 4.74E-02 | 3                  | 7.53E-01 | 3                  | 7.53E-01 | 2                  | 4.40E-01 | 2                  | 4.40E-01 |
| RPAP3     | 12  | 3                  | 1.23E-01 | 3                  | 1.23E-01 | 3                  | 4.40E-01 | 3                  | 4.40E-01 |                    |          |                    |          |

| SetID     | Chr | ADEH- vs NA        |          |                    |          | ADEH+ vs ADEH-     |          |                    |          | ADEH+ vs NA        |          |                    |          |
|-----------|-----|--------------------|----------|--------------------|----------|--------------------|----------|--------------------|----------|--------------------|----------|--------------------|----------|
|           |     | rare novel         |          | all                |          | rare novel         |          | all                |          | rare novel         |          | all                |          |
|           |     | N variants in test | p-value  | N variants in test | p-value  | N variants in test | p-value  | N variants in test | p-value  | N variants in test | p-value  | N variants in test | p-value  |
| PRSS54    | 16  | 1                  | 4.05E-01 | 1                  | 4.05E-01 | 1                  | 4.40E-01 | 1                  | 4.40E-01 |                    |          |                    |          |
| MICAL3    | 22  | 5                  | 3.98E-01 | 5                  | 3.98E-01 | 4                  | 4.40E-01 | 4                  | 4.40E-01 | 1                  | 6.41E-01 | 1                  | 6.41E-01 |
| CYP2J2    | 1   | 2                  | 6.33E-01 | 2                  | 6.33E-01 | 1                  | 4.40E-01 | 1                  | 4.40E-01 | 2                  | 6.05E-01 | 2                  | 6.05E-01 |
| ZBPB      | 7   | 3                  | 7.13E-02 | 3                  | 7.13E-02 | 2                  | 5.89E-01 | 2                  | 5.89E-01 | 1                  | 4.40E-01 | 1                  | 4.40E-01 |
| TAB1      | 22  | 1                  | 4.15E-01 | 1                  | 4.15E-01 | 1                  | 4.40E-01 | 1                  | 4.40E-01 |                    |          |                    |          |
| DPH7      | 9   | 1                  | 4.90E-01 | 1                  | 4.90E-01 | 1                  | 4.40E-01 | 1                  | 4.40E-01 | 1                  | 4.65E-01 | 1                  | 4.65E-01 |
| SSFA2     | 2   | 7                  | 6.85E-01 | 7                  | 6.85E-01 | 7                  | 4.40E-01 | 7                  | 4.40E-01 | 4                  | 4.70E-01 | 4                  | 4.70E-01 |
| TRIM56    | 7   | 1                  | 4.14E-01 | 1                  | 4.14E-01 | 1                  | 4.40E-01 | 1                  | 4.40E-01 |                    |          |                    |          |
| KIFAP3    | 1   | 2                  | 1.00E+00 | 2                  | 1.00E+00 | 2                  | 4.40E-01 | 2                  | 4.40E-01 | 1                  | 4.46E-01 | 1                  | 4.46E-01 |
| CNTN6     | 3   | 9                  | 1.47E-01 | 9                  | 1.47E-01 | 7                  | 4.41E-01 | 7                  | 4.41E-01 | 4                  | 1.00E+00 | 4                  | 1.00E+00 |
| AFM       | 4   | 3                  | 7.06E-02 | 3                  | 7.06E-02 | 1                  | 4.41E-01 | 1                  | 4.41E-01 | 3                  | 4.89E-01 | 3                  | 4.89E-01 |
| C20orf195 | 20  | 2                  | 4.06E-01 | 2                  | 4.06E-01 | 1                  | 4.41E-01 | 1                  | 4.41E-01 | 1                  | 6.57E-01 | 1                  | 6.57E-01 |
| IL6R      | 1   | 1                  | 7.45E-01 | 1                  | 7.45E-01 | 1                  | 4.41E-01 | 1                  | 4.41E-01 |                    |          |                    |          |
| MPL       | 1   | 2                  | 4.80E-01 | 2                  | 4.80E-01 | 1                  | 4.41E-01 | 1                  | 4.41E-01 | 1                  | 6.34E-01 | 1                  | 6.34E-01 |
| NEK4      | 3   | 2                  | 4.86E-01 | 2                  | 4.86E-01 | 1                  | 4.41E-01 | 1                  | 4.41E-01 | 1                  | 5.93E-01 | 1                  | 5.93E-01 |
| STRA6     | 15  | 1                  | 7.45E-01 | 1                  | 7.45E-01 | 1                  | 4.41E-01 | 1                  | 4.41E-01 |                    |          |                    |          |
| MGRN1     | 16  | 3                  | 4.07E-01 | 3                  | 4.07E-01 | 3                  | 7.89E-01 | 3                  | 7.89E-01 | 1                  | 4.41E-01 | 1                  | 4.41E-01 |
| CEP152    | 15  | 6                  | 8.61E-01 | 6                  | 8.61E-01 | 5                  | 5.06E-01 | 5                  | 5.06E-01 | 2                  | 4.41E-01 | 2                  | 4.41E-01 |
| PADI3     | 1   | 6                  | 1.00E+00 | 7                  | 7.80E-01 | 6                  | 5.78E-01 | 7                  | 6.73E-01 | 3                  | 5.29E-01 | 4                  | 4.41E-01 |
| PIK3C3    | 18  | 2                  | 4.12E-01 | 2                  | 4.12E-01 | 1                  | 4.41E-01 | 1                  | 4.41E-01 | 1                  | 6.04E-01 | 1                  | 6.04E-01 |
| TBCE      | 1   | 4                  | 7.83E-01 | 4                  | 7.83E-01 | 4                  | 4.62E-01 | 4                  | 4.62E-01 | 1                  | 4.41E-01 | 1                  | 4.41E-01 |
| ZNF777    | 7   | 3                  | 6.25E-02 | 3                  | 6.25E-02 | 2                  | 5.91E-01 | 2                  | 5.91E-01 | 1                  | 4.41E-01 | 1                  | 4.41E-01 |
| SRBD1     | 2   | 4                  | 2.08E-01 | 5                  | 4.73E-01 | 4                  | 5.60E-01 | 5                  | 8.78E-01 |                    |          | 1                  | 4.41E-01 |
| NRP1      | 10  | 3                  | 4.78E-02 | 3                  | 4.78E-02 | 2                  | 6.44E-01 | 2                  | 6.44E-01 | 1                  | 4.41E-01 | 1                  | 4.41E-01 |
| PNISR     | 6   | 5                  | 1.00E+00 | 5                  | 1.00E+00 | 4                  | 4.61E-01 | 4                  | 4.61E-01 | 2                  | 4.41E-01 | 2                  | 4.41E-01 |
| BSG       | 19  | 1                  | 3.81E-01 | 1                  | 3.81E-01 | 1                  | 4.41E-01 | 1                  | 4.41E-01 |                    |          |                    |          |
| MYT1      | 20  | 3                  | 2.13E-01 | 3                  | 2.13E-01 | 1                  | 4.41E-01 | 1                  | 4.41E-01 | 2                  | 6.41E-01 | 2                  | 6.41E-01 |
| KIAA1324  | 1   | 4                  | 8.56E-01 | 4                  | 8.56E-01 | 3                  | 5.20E-01 | 3                  | 5.20E-01 | 2                  | 4.41E-01 | 2                  | 4.41E-01 |
| IGFBP1    | 7   | 2                  | 1.39E-01 | 2                  | 1.39E-01 | 2                  | 4.41E-01 | 2                  | 4.41E-01 |                    |          |                    |          |
| DNAH12    | 3   | 2                  | 2.55E-01 | 2                  | 2.55E-01 | 1                  | 4.41E-01 | 1                  | 4.41E-01 | 2                  | 4.65E-01 | 2                  | 4.65E-01 |
| BICC1     | 10  | 4                  | 1.00E+00 | 4                  | 1.00E+00 | 3                  | 4.41E-01 | 3                  | 4.41E-01 | 3                  | 5.05E-01 | 3                  | 5.05E-01 |
| CD47      | 3   | 1                  | 8.90E-01 | 1                  | 8.90E-01 | 1                  | 4.41E-01 | 1                  | 4.41E-01 | 1                  | 6.28E-01 | 1                  | 6.28E-01 |
| TPH1      | 11  | 2                  | 3.65E-02 | 2                  | 3.65E-02 | 1                  | 4.80E-01 | 1                  | 4.80E-01 | 1                  | 4.41E-01 | 1                  | 4.41E-01 |
| ZNF563    | 19  | 5                  | 1.42E-01 | 5                  | 1.42E-01 | 4                  | 1.00E+00 | 4                  | 1.00E+00 | 3                  | 4.41E-01 | 3                  | 4.41E-01 |
| C2orf70   | 2   | 1                  | 4.10E-01 | 1                  | 4.10E-01 | 1                  | 4.42E-01 | 1                  | 4.42E-01 |                    |          |                    |          |
| LEMD3     | 12  | 2                  | 2.35E-01 | 2                  | 2.35E-01 | 1                  | 4.42E-01 | 1                  | 4.42E-01 | 1                  | 6.42E-01 | 1                  | 6.42E-01 |
| SLC25A29  | 14  | 2                  | 3.47E-02 | 2                  | 3.47E-02 | 1                  | 4.60E-01 | 1                  | 4.60E-01 | 1                  | 4.42E-01 | 1                  | 4.42E-01 |
| CFAP57    | 1   | 4                  | 6.91E-01 | 4                  | 6.91E-01 | 4                  | 5.81E-01 | 4                  | 5.81E-01 | 2                  | 4.42E-01 | 2                  | 4.42E-01 |
| SCO1      | 17  | 1                  | 4.19E-01 | 1                  | 4.19E-01 | 1                  | 4.42E-01 | 1                  | 4.42E-01 |                    |          |                    |          |
| CPED1     | 7   | 4                  | 6.73E-01 | 4                  | 6.73E-01 | 3                  | 4.42E-01 | 3                  | 4.42E-01 | 2                  | 4.53E-01 | 2                  | 4.53E-01 |
| HOXA9     | 7   | 2                  | 3.81E-01 | 2                  | 3.81E-01 | 1                  | 4.42E-01 | 1                  | 4.42E-01 | 1                  | 6.48E-01 | 1                  | 6.48E-01 |
| SLC5A1    | 22  | 1                  | 3.79E-01 | 1                  | 3.79E-01 | 1                  | 4.42E-01 | 1                  | 4.42E-01 |                    |          |                    |          |
| ABLIM3    | 5   | 2                  | 6.21E-01 | 2                  | 6.21E-01 | 1                  | 4.42E-01 | 1                  | 4.42E-01 | 2                  | 6.53E-01 | 2                  | 6.53E-01 |
| MANBA     | 4   | 3                  | 6.66E-01 | 3                  | 6.66E-01 | 3                  | 4.42E-01 | 3                  | 4.42E-01 | 2                  | 1.00E+00 | 2                  | 1.00E+00 |
| FGGY      | 1   | 6                  | 4.24E-01 | 6                  | 4.24E-01 | 4                  | 4.42E-01 | 4                  | 4.42E-01 | 2                  | 6.37E-01 | 2                  | 6.37E-01 |
| ATP1A2    | 1   | 2                  | 3.72E-01 | 2                  | 3.72E-01 | 1                  | 4.42E-01 | 1                  | 4.42E-01 | 1                  | 6.00E-01 | 1                  | 6.00E-01 |
| ZNF236    | 18  | 1                  | 3.95E-01 | 1                  | 3.95E-01 | 1                  | 4.42E-01 | 1                  | 4.42E-01 |                    |          |                    |          |
| PLAG1     | 8   | 2                  | 2.27E-01 | 2                  | 2.27E-01 | 1                  | 4.42E-01 | 1                  | 4.42E-01 | 2                  | 4.64E-01 | 2                  | 4.64E-01 |



| SetID    | Chr | ADEH- vs NA        |          |                    |          | ADEH+ vs ADEH-     |          |                    |          | ADEH+ vs NA        |          |                    |          |
|----------|-----|--------------------|----------|--------------------|----------|--------------------|----------|--------------------|----------|--------------------|----------|--------------------|----------|
|          |     | N variants in test | p-value  | N variants in test | p-value  | N variants in test | p-value  | N variants in test | p-value  | N variants in test | p-value  | N variants in test | p-value  |
| FAM134A  | 2   | 1                  | 9.22E-01 | 1                  | 9.22E-01 | 1                  | 4.42E-01 | 1                  | 4.42E-01 | 1                  | 6.33E-01 | 1                  | 6.33E-01 |
| P2RY13   | 3   | 1                  | 7.42E-01 | 1                  | 7.42E-01 | 1                  | 4.42E-01 | 1                  | 4.42E-01 |                    |          |                    |          |
| TSTA3    | 8   | 2                  | 4.32E-01 | 2                  | 4.32E-01 | 1                  | 4.42E-01 | 1                  | 4.42E-01 | 1                  | 6.15E-01 | 1                  | 6.15E-01 |
| GPATCH3  | 1   | 1                  | 7.42E-01 | 1                  | 7.42E-01 | 1                  | 4.42E-01 | 1                  | 4.42E-01 |                    |          |                    |          |
| ZNF670   | 1   | 1                  | 7.42E-01 | 1                  | 7.42E-01 | 1                  | 4.42E-01 | 1                  | 4.42E-01 |                    |          |                    |          |
| CCDC13   | 3   | 2                  | 4.99E-01 | 3                  | 5.00E-01 | 1                  | 4.42E-01 | 2                  | 4.45E-01 | 1                  | 6.80E-01 | 2                  | 6.83E-01 |
| BPIFB6   | 20  | 1                  | 7.42E-01 | 1                  | 7.42E-01 | 1                  | 4.42E-01 | 1                  | 4.42E-01 |                    |          |                    |          |
| CSRP2    | 12  | 1                  | 7.42E-01 | 1                  | 7.42E-01 | 1                  | 4.42E-01 | 1                  | 4.42E-01 |                    |          |                    |          |
| STAT6    | 12  | 1                  | 7.47E-01 | 1                  | 7.47E-01 | 1                  | 4.42E-01 | 1                  | 4.42E-01 |                    |          |                    |          |
| FBXL12   | 19  | 1                  | 7.47E-01 | 1                  | 7.47E-01 | 1                  | 4.42E-01 | 1                  | 4.42E-01 |                    |          |                    |          |
| OR7C1    | 19  | 1                  | 7.20E-01 | 2                  | 7.17E-01 | 1                  | 4.42E-01 | 2                  | 4.61E-01 | 1                  | 6.34E-01 | 2                  | 6.34E-01 |
| IVL      | 1   | 1                  | 7.47E-01 | 1                  | 7.47E-01 | 1                  | 4.42E-01 | 1                  | 4.42E-01 |                    |          |                    |          |
| MRPS14   | 1   | 1                  | 7.47E-01 | 1                  | 7.47E-01 | 1                  | 4.42E-01 | 1                  | 4.42E-01 |                    |          |                    |          |
| ZNF691   | 1   | 1                  | 7.47E-01 | 1                  | 7.47E-01 | 1                  | 4.42E-01 | 1                  | 4.42E-01 |                    |          |                    |          |
| CACNG5   | 17  | 1                  | 4.64E-01 | 1                  | 4.64E-01 | 1                  | 4.42E-01 | 1                  | 4.42E-01 | 1                  | 4.54E-01 | 1                  | 4.54E-01 |
| OR5B12   | 11  | 1                  | 5.48E-01 | 1                  | 5.48E-01 | 1                  | 4.66E-01 | 1                  | 4.66E-01 | 1                  | 4.42E-01 | 1                  | 4.42E-01 |
| CTU2     | 16  | 4                  | 1.00E+00 | 4                  | 1.00E+00 | 4                  | 4.84E-01 | 4                  | 4.84E-01 | 2                  | 4.42E-01 | 2                  | 4.42E-01 |
| C16orf54 | 16  | 1                  | 4.05E-01 | 1                  | 4.05E-01 | 1                  | 4.42E-01 | 1                  | 4.42E-01 |                    |          |                    |          |
| FKBP10   | 17  | 1                  | 4.73E-01 | 1                  | 4.73E-01 | 1                  | 4.52E-01 | 1                  | 4.52E-01 | 1                  | 4.43E-01 | 1                  | 4.43E-01 |
| SLC3A2   | 11  | 1                  | 8.79E-01 | 1                  | 8.79E-01 | 1                  | 4.43E-01 | 1                  | 4.43E-01 | 1                  | 5.93E-01 | 1                  | 5.93E-01 |
| ARHGAP9  | 12  | 3                  | 8.81E-01 | 3                  | 8.81E-01 | 3                  | 5.70E-01 | 3                  | 5.70E-01 | 1                  | 4.43E-01 | 1                  | 4.43E-01 |
| HSD17B4  | 5   | 1                  | 1.89E-02 | 2                  | 1.89E-02 |                    |          | 1                  | 1.00E+00 | 1                  | 4.43E-01 | 2                  | 4.43E-01 |
| GPR158   | 10  | 6                  | 8.20E-02 | 6                  | 8.20E-02 | 6                  | 4.43E-01 | 6                  | 4.43E-01 |                    |          |                    |          |
| FAM26D   | 6   | 1                  | 4.85E-01 | 2                  | 8.31E-01 | 1                  | 4.71E-01 | 2                  | 6.94E-01 | 1                  | 4.43E-01 | 2                  | 7.36E-01 |
| KLHL29   | 2   | 1                  | 8.97E-01 | 1                  | 8.97E-01 | 1                  | 4.43E-01 | 1                  | 4.43E-01 | 1                  | 6.22E-01 | 1                  | 6.22E-01 |
| DEPDC7   | 11  | 2                  | 6.21E-01 | 2                  | 6.21E-01 | 1                  | 4.43E-01 | 1                  | 4.43E-01 | 2                  | 6.46E-01 | 2                  | 6.46E-01 |
| FITM1    | 14  | 1                  | 2.08E-01 | 1                  | 2.08E-01 | 1                  | 5.32E-01 | 1                  | 5.32E-01 | 1                  | 4.43E-01 | 1                  | 4.43E-01 |
| PYHIN1   | 1   | 5                  | 2.52E-01 | 5                  | 2.52E-01 | 5                  | 5.78E-01 | 5                  | 5.78E-01 | 2                  | 4.43E-01 | 2                  | 4.43E-01 |
| ZBED9    | 6   | 2                  | 1.00E+00 | 2                  | 1.00E+00 | 2                  | 5.18E-01 | 2                  | 5.18E-01 | 1                  | 4.43E-01 | 1                  | 4.43E-01 |
| ZNF114   | 19  | 1                  | 2.12E-02 | 1                  | 2.12E-02 |                    |          |                    |          | 1                  | 4.43E-01 | 1                  | 4.43E-01 |
| TATDN1   | 8   | 2                  | 6.47E-01 | 2                  | 6.47E-01 | 1                  | 4.43E-01 | 1                  | 4.43E-01 | 2                  | 6.34E-01 | 2                  | 6.34E-01 |
| IMPG1    | 6   | 3                  | 4.11E-01 | 3                  | 4.11E-01 | 3                  | 8.27E-01 | 3                  | 8.27E-01 | 1                  | 4.43E-01 | 1                  | 4.43E-01 |
| FRZB     | 2   | 1                  | 7.33E-01 | 2                  | 6.28E-01 | 1                  | 4.94E-01 | 2                  | 6.38E-01 |                    |          | 1                  | 4.44E-01 |
| TBC1D21  | 15  | 2                  | 1.00E+00 | 2                  | 1.00E+00 | 2                  | 1.00E+00 | 2                  | 1.00E+00 | 1                  | 4.44E-01 | 1                  | 4.44E-01 |
| SAC3D1   | 11  | 1                  | 9.57E-01 | 1                  | 9.57E-01 | 1                  | 4.44E-01 | 1                  | 4.44E-01 | 1                  | 6.82E-01 | 1                  | 6.82E-01 |
| SETD6    | 16  | 2                  | 4.39E-01 | 2                  | 4.39E-01 | 1                  | 4.44E-01 | 1                  | 4.44E-01 | 1                  | 6.28E-01 | 1                  | 6.28E-01 |
| SLC19A1  | 21  | 1                  | 7.38E-01 | 1                  | 7.38E-01 | 1                  | 4.44E-01 | 1                  | 4.44E-01 |                    |          |                    |          |
| NIPAL3   | 1   | 1                  | 7.38E-01 | 1                  | 7.38E-01 | 1                  | 4.44E-01 | 1                  | 4.44E-01 |                    |          |                    |          |
| LYZL4    | 3   | 1                  | 7.38E-01 | 1                  | 7.38E-01 | 1                  | 4.44E-01 | 1                  | 4.44E-01 |                    |          |                    |          |
| PPP6R3   | 11  | 2                  | 5.00E-01 | 2                  | 5.00E-01 | 1                  | 4.44E-01 | 1                  | 4.44E-01 | 1                  | 6.09E-01 | 1                  | 6.09E-01 |
| CORO2B   | 15  | 2                  | 3.85E-01 | 2                  | 3.85E-01 | 1                  | 4.44E-01 | 1                  | 4.44E-01 | 1                  | 5.92E-01 | 1                  | 5.92E-01 |
| FOXD3    | 1   | 1                  | 6.87E-01 | 1                  | 6.87E-01 | 1                  | 4.44E-01 | 1                  | 4.44E-01 | 1                  | 6.18E-01 | 1                  | 6.18E-01 |
| HBQ1     | 16  | 1                  | 6.94E-01 | 1                  | 6.94E-01 | 1                  | 4.44E-01 | 1                  | 4.44E-01 | 1                  | 6.05E-01 | 1                  | 6.05E-01 |
| XPO6     | 16  | 1                  | 7.54E-01 | 1                  | 7.54E-01 | 1                  | 1.00E+00 | 1                  | 1.00E+00 | 1                  | 4.44E-01 | 1                  | 4.44E-01 |
| DNAH5    | 5   | 19                 | 3.39E-01 | 20                 | 3.43E-01 | 14                 | 4.44E-01 | 15                 | 4.51E-01 | 10                 | 6.12E-01 | 11                 | 6.17E-01 |
| DMRTA2   | 1   | 1                  | 1.68E-02 | 1                  | 1.68E-02 |                    |          |                    |          | 1                  | 4.44E-01 | 1                  | 4.44E-01 |
| HRH4     | 18  | 1                  | 2.38E-01 | 1                  | 2.38E-01 | 1                  | 4.44E-01 | 1                  | 4.44E-01 |                    |          |                    |          |
| METTL4   | 18  | 1                  | 7.86E-01 | 1                  | 7.86E-01 | 1                  | 6.25E-01 | 1                  | 6.25E-01 | 1                  | 4.44E-01 | 1                  | 4.44E-01 |

| SetID      | Chr | ADEH- vs NA        |          |                    |          | ADEH+ vs ADEH-     |          |                    |          | ADEH+ vs NA        |          |                    |          |
|------------|-----|--------------------|----------|--------------------|----------|--------------------|----------|--------------------|----------|--------------------|----------|--------------------|----------|
|            |     | rarenovel          |          | all                |          | rarenovel          |          | all                |          | rarenovel          |          | all                |          |
|            |     | N variants in test | p-value  | N variants in test | p-value  | N variants in test | p-value  | N variants in test | p-value  | N variants in test | p-value  | N variants in test | p-value  |
| SMAP1      | 6   | 1                  | 7.36E-01 | 1                  | 7.36E-01 | 1                  | 4.44E-01 | 1                  | 4.44E-01 |                    |          |                    |          |
| GALNT7     | 4   | 1                  | 7.36E-01 | 1                  | 7.36E-01 | 1                  | 4.44E-01 | 1                  | 4.44E-01 |                    |          |                    |          |
| ANGPTL1    | 1   | 1                  | 7.36E-01 | 1                  | 7.36E-01 | 1                  | 4.44E-01 | 1                  | 4.44E-01 |                    |          |                    |          |
| RGS13      | 1   | 2                  | 4.11E-01 | 2                  | 4.11E-01 | 1                  | 4.44E-01 | 1                  | 4.44E-01 | 1                  | 6.12E-01 | 1                  | 6.12E-01 |
| THAP10     | 15  | 1                  | 7.36E-01 | 1                  | 7.36E-01 | 1                  | 4.44E-01 | 1                  | 4.44E-01 |                    |          |                    |          |
| ANAPC2     | 9   | 3                  | 7.15E-01 | 3                  | 7.15E-01 | 3                  | 4.58E-01 | 3                  | 4.58E-01 | 1                  | 4.44E-01 | 1                  | 4.44E-01 |
| MEOX1      | 17  | 2                  | 3.85E-01 | 2                  | 3.85E-01 | 2                  | 6.44E-01 | 2                  | 6.44E-01 | 1                  | 4.44E-01 | 1                  | 4.44E-01 |
| GP1BA      | 17  | 1                  | 4.97E-01 | 1                  | 4.97E-01 | 1                  | 4.44E-01 | 1                  | 4.44E-01 | 1                  | 4.52E-01 | 1                  | 4.52E-01 |
| TRIM38     | 6   | 1                  | 7.53E-01 | 1                  | 7.53E-01 | 1                  | 4.69E-01 | 1                  | 4.69E-01 | 1                  | 4.44E-01 | 1                  | 4.44E-01 |
| BORA       | 13  | 2                  | 6.77E-01 | 2                  | 6.77E-01 | 2                  | 6.51E-01 | 2                  | 6.51E-01 | 1                  | 4.44E-01 | 1                  | 4.44E-01 |
| DUOX1      | 15  | 8                  | 5.38E-01 | 8                  | 5.38E-01 | 7                  | 4.55E-01 | 7                  | 4.55E-01 | 5                  | 4.44E-01 | 5                  | 4.44E-01 |
| MSTN       | 2   | 2                  | 1.00E+00 | 2                  | 1.00E+00 | 2                  | 4.44E-01 | 2                  | 4.44E-01 | 1                  | 4.48E-01 | 1                  | 4.48E-01 |
| THBS3      | 1   | 6                  | 2.03E-01 | 6                  | 2.03E-01 | 6                  | 4.44E-01 | 6                  | 4.44E-01 | 1                  | 1.00E+00 | 1                  | 1.00E+00 |
| CFAP46     | 10  | 10                 | 8.53E-01 | 10                 | 8.53E-01 | 9                  | 5.34E-01 | 9                  | 5.34E-01 | 6                  | 4.44E-01 | 6                  | 4.44E-01 |
| GRK6       | 5   | 1                  | 1.90E-02 | 1                  | 1.90E-02 |                    |          |                    |          | 1                  | 4.44E-01 | 1                  | 4.44E-01 |
| ARPC4-TTL3 | 3   | 1                  | 4.16E-01 | 1                  | 4.16E-01 | 1                  | 4.44E-01 | 1                  | 4.44E-01 |                    |          |                    |          |
| BRICD5     | 16  | 5                  | 3.86E-01 | 5                  | 3.86E-01 | 2                  | 4.44E-01 | 2                  | 4.44E-01 | 4                  | 6.33E-01 | 4                  | 6.33E-01 |
| CDC14A     | 1   | 1                  | 2.10E-01 | 1                  | 2.10E-01 | 1                  | 5.19E-01 | 1                  | 5.19E-01 | 1                  | 4.44E-01 | 1                  | 4.44E-01 |
| AMPH       | 7   | 2                  | 4.03E-01 | 2                  | 4.03E-01 | 2                  | 5.79E-01 | 2                  | 5.79E-01 | 1                  | 4.44E-01 | 1                  | 4.44E-01 |
| SUCLG1     | 2   | 1                  | 1.07E-01 | 1                  | 1.07E-01 | 1                  | 4.45E-01 | 1                  | 4.45E-01 |                    |          |                    |          |
| ADGRD1     | 12  | 5                  | 2.06E-01 | 5                  | 2.06E-01 | 2                  | 1.00E+00 | 2                  | 1.00E+00 | 4                  | 4.45E-01 | 4                  | 4.45E-01 |
| ADGRF1     | 6   | 6                  | 1.18E-01 | 6                  | 1.18E-01 | 6                  | 4.45E-01 | 6                  | 4.45E-01 |                    |          |                    |          |
| GNB1L      | 22  | 4                  | 5.66E-01 | 4                  | 5.66E-01 | 2                  | 4.45E-01 | 2                  | 4.45E-01 | 3                  | 5.11E-01 | 3                  | 5.11E-01 |
| SPATC1     | 8   | 3                  | 2.43E-01 | 3                  | 2.43E-01 | 1                  | 4.45E-01 | 1                  | 4.45E-01 | 2                  | 6.24E-01 | 2                  | 6.24E-01 |
| ZNF395     | 8   | 1                  | 1.79E-02 | 1                  | 1.79E-02 |                    |          |                    |          | 1                  | 4.45E-01 | 1                  | 4.45E-01 |
| COX4I2     | 20  | 2                  | 3.45E-02 | 2                  | 3.45E-02 | 1                  | 4.90E-01 | 1                  | 4.90E-01 | 1                  | 4.45E-01 | 1                  | 4.45E-01 |
| OR1J4      | 9   | 2                  | 6.03E-01 | 2                  | 6.03E-01 | 1                  | 4.45E-01 | 1                  | 4.45E-01 | 2                  | 6.36E-01 | 2                  | 6.36E-01 |
| PTGR1      | 9   | 1                  | 1.75E-02 | 1                  | 1.75E-02 |                    |          |                    |          | 1                  | 4.45E-01 | 1                  | 4.45E-01 |
| MROH7      | 1   | 3                  | 6.78E-01 | 4                  | 6.78E-01 | 3                  | 8.12E-01 | 4                  | 8.13E-01 | 1                  | 4.45E-01 | 2                  | 4.49E-01 |
| FLRT2      | 14  | 1                  | 4.14E-01 | 1                  | 4.14E-01 | 1                  | 4.45E-01 | 1                  | 4.45E-01 |                    |          |                    |          |
| ENDOU      | 12  | 1                  | 1.79E-01 | 1                  | 1.79E-01 | 1                  | 4.74E-01 | 1                  | 4.74E-01 | 1                  | 4.45E-01 | 1                  | 4.45E-01 |
| PON3       | 7   | 4                  | 6.21E-01 | 4                  | 6.21E-01 | 3                  | 4.45E-01 | 3                  | 4.45E-01 | 2                  | 6.39E-01 | 2                  | 6.39E-01 |
| HCRTR2     | 6   | 1                  | 4.10E-01 | 1                  | 4.10E-01 | 1                  | 4.45E-01 | 1                  | 4.45E-01 |                    |          |                    |          |
| SLC52A1    | 17  | 1                  | 7.55E-01 | 2                  | 8.19E-01 | 1                  | 4.98E-01 | 2                  | 5.55E-01 |                    |          | 1                  | 4.45E-01 |
| C10orf82   | 10  | 2                  | 3.06E-02 | 2                  | 3.06E-02 | 1                  | 5.67E-01 | 1                  | 5.67E-01 | 1                  | 4.45E-01 | 1                  | 4.45E-01 |
| DLGAP5     | 14  | 5                  | 4.70E-01 | 5                  | 4.70E-01 | 5                  | 5.32E-01 | 5                  | 5.32E-01 | 3                  | 4.45E-01 | 3                  | 4.45E-01 |
| NOL12      | 22  | 2                  | 3.26E-02 | 2                  | 3.26E-02 | 1                  | 6.86E-01 | 1                  | 6.86E-01 | 1                  | 4.45E-01 | 1                  | 4.45E-01 |
| HMGCR      | 5   | 3                  | 4.75E-01 | 3                  | 4.75E-01 | 2                  | 6.06E-01 | 2                  | 6.06E-01 | 2                  | 4.45E-01 | 2                  | 4.45E-01 |
| CAB39L     | 13  | 1                  | 4.05E-01 | 1                  | 4.05E-01 | 1                  | 4.45E-01 | 1                  | 4.45E-01 |                    |          |                    |          |
| KRT15      | 17  | 3                  | 2.57E-01 | 3                  | 2.57E-01 | 1                  | 4.45E-01 | 1                  | 4.45E-01 | 2                  | 6.22E-01 | 2                  | 6.22E-01 |
| OR9Q2      | 11  | 1                  | 7.45E-01 | 2                  | 7.60E-01 | 1                  | 5.07E-01 | 2                  | 5.11E-01 |                    |          | 1                  | 4.45E-01 |
| SSNA1      | 9   | 1                  | 1.94E-02 | 1                  | 1.94E-02 |                    |          |                    |          | 1                  | 4.45E-01 | 1                  | 4.45E-01 |
| ZBED5      | 11  | 5                  | 4.52E-01 | 5                  | 4.52E-01 | 4                  | 1.00E+00 | 4                  | 1.00E+00 | 2                  | 4.45E-01 | 2                  | 4.45E-01 |
| FGB        | 4   | 2                  | 2.46E-02 | 2                  | 2.46E-02 | 1                  | 5.22E-01 | 1                  | 5.22E-01 | 1                  | 4.45E-01 | 1                  | 4.45E-01 |
| CRNN       | 1   | 1                  | 4.13E-01 | 1                  | 4.13E-01 | 1                  | 4.45E-01 | 1                  | 4.45E-01 |                    |          |                    |          |
| MYO18A     | 17  | 13                 | 6.15E-02 | 13                 | 6.15E-02 | 12                 | 4.45E-01 | 12                 | 4.45E-01 | 4                  | 4.46E-01 | 4                  | 4.46E-01 |
| DGKH       | 13  | 1                  | 7.39E-01 | 1                  | 7.39E-01 | 1                  | 4.45E-01 | 1                  | 4.45E-01 |                    |          |                    |          |
| ARHGEF3    | 3   | 1                  | 7.39E-01 | 1                  | 7.39E-01 | 1                  | 4.45E-01 | 1                  | 4.45E-01 |                    |          |                    |          |

| SetID    | Chr | ADEH- vs NA        |          |                    |          | ADEH+ vs ADEH-     |          |                    |          | ADEH+ vs NA        |          |                    |          |
|----------|-----|--------------------|----------|--------------------|----------|--------------------|----------|--------------------|----------|--------------------|----------|--------------------|----------|
|          |     | rarenovel          |          | all                |          | rarenovel          |          | all                |          | rarenovel          |          | all                |          |
|          |     | N variants in test | p-value  | N variants in test | p-value  | N variants in test | p-value  | N variants in test | p-value  | N variants in test | p-value  | N variants in test | p-value  |
| MCU      | 10  | 2                  | 4.12E-01 | 2                  | 4.12E-01 | 1                  | 4.45E-01 | 1                  | 4.45E-01 | 1                  | 6.85E-01 | 1                  | 6.85E-01 |
| CD7      | 17  | 1                  | 7.39E-01 | 1                  | 7.39E-01 | 1                  | 4.45E-01 | 1                  | 4.45E-01 |                    |          |                    |          |
| INPP4B   | 4   | 1                  | 6.62E-01 | 1                  | 6.62E-01 | 1                  | 4.45E-01 | 1                  | 4.45E-01 | 1                  | 5.63E-01 | 1                  | 5.63E-01 |
| TRIM47   | 17  | 1                  | 7.34E-01 | 2                  | 8.24E-01 | 1                  | 4.45E-01 | 2                  | 4.69E-01 | 1                  | 6.17E-01 | 2                  | 6.61E-01 |
| B3GALT6  | 1   | 1                  | 4.10E-01 | 1                  | 4.10E-01 | 1                  | 4.46E-01 | 1                  | 4.46E-01 |                    |          |                    |          |
| TUBG1    | 17  | 1                  | 1.52E-01 | 1                  | 1.52E-01 | 1                  | 4.46E-01 | 1                  | 4.46E-01 |                    |          |                    |          |
| STAMBP   | 2   | 1                  | 8.79E-01 | 1                  | 8.79E-01 | 1                  | 4.46E-01 | 1                  | 4.46E-01 | 1                  | 6.23E-01 | 1                  | 6.23E-01 |
| ACBD5    | 10  | 5                  | 1.20E-01 | 5                  | 1.20E-01 | 3                  | 4.50E-01 | 3                  | 4.50E-01 | 2                  | 4.46E-01 | 2                  | 4.46E-01 |
| COL23A1  | 5   | 1                  | 4.14E-01 | 2                  | 6.34E-01 | 1                  | 4.46E-01 | 2                  | 6.07E-01 |                    |          | 1                  | 4.54E-01 |
| SYNGR1   | 22  | 2                  | 2.96E-02 | 2                  | 2.96E-02 | 1                  | 4.88E-01 | 1                  | 4.88E-01 | 1                  | 4.46E-01 | 1                  | 4.46E-01 |
| HIST1H1D | 6   | 3                  | 1.47E-01 | 3                  | 1.47E-01 | 3                  | 4.46E-01 | 3                  | 4.46E-01 |                    |          |                    |          |
| FUCA1    | 1   | 1                  | 1.77E-02 | 1                  | 1.77E-02 |                    |          |                    |          | 1                  | 4.46E-01 | 1                  | 4.46E-01 |
| CLEC4F   | 2   | 1                  | 4.95E-01 | 1                  | 4.95E-01 | 1                  | 4.46E-01 | 1                  | 4.46E-01 | 1                  | 4.50E-01 | 1                  | 4.50E-01 |
| USP40    | 2   | 4                  | 8.24E-01 | 4                  | 8.24E-01 | 3                  | 4.52E-01 | 3                  | 4.52E-01 | 2                  | 4.46E-01 | 2                  | 4.46E-01 |
| NPB      | 17  | 1                  | 9.47E-01 | 1                  | 9.47E-01 | 1                  | 4.46E-01 | 1                  | 4.46E-01 | 1                  | 6.96E-01 | 1                  | 6.96E-01 |
| CYP39A1  | 6   | 7                  | 8.86E-01 | 7                  | 8.86E-01 | 7                  | 4.46E-01 | 7                  | 4.46E-01 | 5                  | 5.24E-01 | 5                  | 5.24E-01 |
| FOXQ1    | 6   |                    |          | 1                  | 6.36E-01 |                    |          | 1                  | 6.27E-01 |                    |          | 1                  | 4.46E-01 |
| ANKMY2   | 7   | 1                  | 7.50E-01 | 1                  | 7.50E-01 | 1                  | 4.46E-01 | 1                  | 4.46E-01 |                    |          |                    |          |
| MALRD1   | 10  | 1                  | 7.50E-01 | 1                  | 7.50E-01 | 1                  | 4.46E-01 | 1                  | 4.46E-01 |                    |          |                    |          |
| C1QBP    | 17  | 1                  | 7.50E-01 | 1                  | 7.50E-01 | 1                  | 4.46E-01 | 1                  | 4.46E-01 |                    |          |                    |          |
| NUP85    | 17  | 1                  | 7.50E-01 | 1                  | 7.50E-01 | 1                  | 4.46E-01 | 1                  | 4.46E-01 |                    |          |                    |          |
| KRTAP3-3 | 17  | 2                  | 5.97E-01 | 2                  | 5.97E-01 | 1                  | 4.46E-01 | 1                  | 4.46E-01 | 2                  | 6.42E-01 | 2                  | 6.42E-01 |
| REEP4    | 8   | 2                  | 2.84E-01 | 2                  | 2.84E-01 | 1                  | 4.46E-01 | 1                  | 4.46E-01 | 1                  | 6.23E-01 | 1                  | 6.23E-01 |
| NRIP1    | 21  | 3                  | 4.16E-01 | 4                  | 4.61E-01 | 3                  | 8.03E-01 | 4                  | 1.00E+00 | 1                  | 4.46E-01 | 2                  | 5.84E-01 |
| COL4A3BP | 5   | 1                  | 2.08E-01 | 1                  | 2.08E-01 | 1                  | 5.27E-01 | 1                  | 5.27E-01 | 1                  | 4.46E-01 | 1                  | 4.46E-01 |
| C8orf74  | 8   | 1                  | 9.68E-01 | 1                  | 9.68E-01 | 1                  | 4.46E-01 | 1                  | 4.46E-01 | 1                  | 6.30E-01 | 1                  | 6.30E-01 |
| SGCB     | 4   | 2                  | 3.41E-02 | 2                  | 3.41E-02 | 1                  | 4.87E-01 | 1                  | 4.87E-01 | 1                  | 4.46E-01 | 1                  | 4.46E-01 |
| POMK     | 8   | 2                  | 7.38E-01 | 2                  | 7.38E-01 | 2                  | 6.99E-01 | 2                  | 6.99E-01 | 1                  | 4.46E-01 | 1                  | 4.46E-01 |
| LGALS16  | 19  | 3                  | 2.05E-02 | 3                  | 2.05E-02 | 1                  | 4.59E-01 | 1                  | 4.59E-01 | 2                  | 4.46E-01 | 2                  | 4.46E-01 |
| HS3ST5   | 6   | 1                  | 7.89E-01 | 1                  | 7.89E-01 | 1                  | 1.00E+00 | 1                  | 1.00E+00 | 1                  | 4.46E-01 | 1                  | 4.46E-01 |
| PRDM15   | 21  | 1                  | 7.54E-01 | 2                  | 6.08E-01 | 1                  | 5.02E-01 | 2                  | 6.44E-01 |                    |          | 1                  | 4.46E-01 |
| VPS37C   | 11  | 1                  | 2.09E-01 | 1                  | 2.09E-01 | 1                  | 4.66E-01 | 1                  | 4.66E-01 | 1                  | 4.46E-01 | 1                  | 4.46E-01 |
| DPYSL4   | 10  | 2                  | 1.00E+00 | 2                  | 1.00E+00 | 2                  | 4.78E-01 | 2                  | 4.78E-01 | 1                  | 4.47E-01 | 1                  | 4.47E-01 |
| NAV2     | 11  | 13                 | 6.69E-01 | 13                 | 6.69E-01 | 11                 | 4.98E-01 | 11                 | 4.98E-01 | 7                  | 4.47E-01 | 7                  | 4.47E-01 |
| TTL7     | 1   | 2                  | 7.05E-01 | 2                  | 7.05E-01 | 2                  | 6.54E-01 | 2                  | 6.54E-01 | 1                  | 4.47E-01 | 1                  | 4.47E-01 |
| ODF3L1   | 15  |                    |          | 1                  | 2.22E-01 |                    |          | 1                  | 7.75E-01 |                    |          | 1                  | 4.47E-01 |
| ADAMTS16 | 5   | 12                 | 2.19E-01 | 12                 | 2.19E-01 | 12                 | 6.88E-01 | 12                 | 6.88E-01 | 5                  | 4.47E-01 | 5                  | 4.47E-01 |
| ARHGEF39 | 9   | 1                  | 4.16E-01 | 1                  | 4.16E-01 | 1                  | 4.47E-01 | 1                  | 4.47E-01 |                    |          |                    |          |
| ARHGAP29 | 1   | 1                  | 5.21E-01 | 1                  | 5.21E-01 | 1                  | 4.50E-01 | 1                  | 4.50E-01 | 1                  | 4.47E-01 | 1                  | 4.47E-01 |
| TMEM87B  | 2   | 2                  | 3.14E-01 | 2                  | 3.14E-01 | 1                  | 4.47E-01 | 1                  | 4.47E-01 | 1                  | 6.16E-01 | 1                  | 6.16E-01 |
| FAM160A2 | 11  | 2                  | 6.58E-02 | 2                  | 6.58E-02 | 1                  | 5.37E-01 | 1                  | 5.37E-01 | 2                  | 4.47E-01 | 2                  | 4.47E-01 |
| KIF21B   | 1   | 4                  | 8.88E-01 | 4                  | 8.88E-01 | 4                  | 5.11E-01 | 4                  | 5.11E-01 | 1                  | 4.47E-01 | 1                  | 4.47E-01 |
| SCN1B    | 19  | 1                  | 1.81E-02 | 1                  | 1.81E-02 |                    |          |                    |          | 1                  | 4.47E-01 | 1                  | 4.47E-01 |
| R3HDM4   | 19  | 2                  | 3.19E-01 | 2                  | 3.19E-01 | 2                  | 5.79E-01 | 2                  | 5.79E-01 | 1                  | 4.47E-01 | 1                  | 4.47E-01 |
| KRTAP5-9 | 11  | 1                  | 8.98E-01 | 1                  | 8.98E-01 | 1                  | 4.47E-01 | 1                  | 4.47E-01 | 1                  | 6.18E-01 | 1                  | 6.18E-01 |
| FGF6     | 12  | 3                  | 7.84E-01 | 3                  | 7.84E-01 | 3                  | 5.74E-01 | 3                  | 5.74E-01 | 1                  | 4.47E-01 | 1                  | 4.47E-01 |
| AK9      | 6   | 9                  | 7.04E-01 | 10                 | 7.05E-01 | 7                  | 4.47E-01 | 8                  | 4.47E-01 | 4                  | 6.32E-01 | 5                  | 6.32E-01 |
| USHBP1   | 19  | 1                  | 4.17E-01 | 1                  | 4.17E-01 | 1                  | 4.47E-01 | 1                  | 4.47E-01 |                    |          |                    |          |

| SetID     | Chr | ADEH- vs NA        |          |                    |          | ADEH+ vs ADEH-     |          |                    |          | ADEH+ vs NA        |          |                    |          |
|-----------|-----|--------------------|----------|--------------------|----------|--------------------|----------|--------------------|----------|--------------------|----------|--------------------|----------|
|           |     | rarenovel          |          | all                |          | rarenovel          |          | all                |          | rarenovel          |          | all                |          |
|           |     | N variants in test | p-value  | N variants in test | p-value  | N variants in test | p-value  | N variants in test | p-value  | N variants in test | p-value  | N variants in test | p-value  |
| PHF23     | 17  | 1                  | 1.00E+00 | 1                  | 1.00E+00 | 1                  | 4.47E-01 | 1                  | 4.47E-01 | 1                  | 6.01E-01 | 1                  | 6.01E-01 |
| ANK1      | 8   | 7                  | 5.67E-01 | 7                  | 5.67E-01 | 7                  | 1.00E+00 | 7                  | 1.00E+00 | 3                  | 4.47E-01 | 3                  | 4.47E-01 |
| HERC2     | 15  | 3                  | 5.36E-01 | 3                  | 5.36E-01 | 3                  | 4.47E-01 | 3                  | 4.47E-01 | 1                  | 1.00E+00 | 1                  | 1.00E+00 |
| NDUFB8    | 10  | 1                  | 7.45E-01 | 1                  | 7.45E-01 | 1                  | 4.47E-01 | 1                  | 4.47E-01 |                    |          |                    |          |
| MRPL9     | 1   | 2                  | 2.17E-01 | 2                  | 2.17E-01 | 1                  | 4.47E-01 | 1                  | 4.47E-01 | 2                  | 6.25E-01 | 2                  | 6.25E-01 |
| IL17REL   | 22  | 2                  | 6.29E-01 | 2                  | 6.29E-01 | 1                  | 4.47E-01 | 1                  | 4.47E-01 | 1                  | 5.28E-01 | 1                  | 5.28E-01 |
| KCNH7     | 2   | 1                  | 7.45E-01 | 1                  | 7.45E-01 | 1                  | 4.47E-01 | 1                  | 4.47E-01 |                    |          |                    |          |
| CELF1     | 11  | 1                  | 7.45E-01 | 1                  | 7.45E-01 | 1                  | 4.47E-01 | 1                  | 4.47E-01 |                    |          |                    |          |
| CD14      | 5   | 1                  | 7.45E-01 | 1                  | 7.45E-01 | 1                  | 4.47E-01 | 1                  | 4.47E-01 |                    |          |                    |          |
| CHST14    | 15  | 1                  | 7.45E-01 | 1                  | 7.45E-01 | 1                  | 4.47E-01 | 1                  | 4.47E-01 |                    |          |                    |          |
| KRR1      | 12  | 1                  | 7.45E-01 | 1                  | 7.45E-01 | 1                  | 4.47E-01 | 1                  | 4.47E-01 |                    |          |                    |          |
| RNF39     | 6   | 1                  | 3.99E-01 | 1                  | 3.99E-01 | 1                  | 4.47E-01 | 1                  | 4.47E-01 |                    |          |                    |          |
| AKAP11    | 13  | 5                  | 3.75E-01 | 5                  | 3.75E-01 | 4                  | 6.35E-01 | 4                  | 6.35E-01 | 2                  | 4.47E-01 | 2                  | 4.47E-01 |
| GBAS      | 7   | 2                  | 4.65E-01 | 2                  | 4.65E-01 | 1                  | 4.47E-01 | 1                  | 4.47E-01 | 1                  | 5.98E-01 | 1                  | 5.98E-01 |
| LPXN      | 11  | 2                  | 4.94E-01 | 2                  | 4.94E-01 | 1                  | 4.47E-01 | 1                  | 4.47E-01 | 1                  | 6.25E-01 | 1                  | 6.25E-01 |
| OR4D11    | 11  | 1                  | 7.50E-01 | 1                  | 7.50E-01 | 1                  | 4.47E-01 | 1                  | 4.47E-01 |                    |          |                    |          |
| MTHFD2L   | 4   | 1                  | 7.50E-01 | 1                  | 7.50E-01 | 1                  | 4.47E-01 | 1                  | 4.47E-01 |                    |          |                    |          |
| VIM       | 10  | 2                  | 3.28E-01 | 2                  | 3.28E-01 | 1                  | 4.47E-01 | 1                  | 4.47E-01 | 1                  | 6.57E-01 | 1                  | 6.57E-01 |
| AICDA     | 12  | 1                  | 7.50E-01 | 1                  | 7.50E-01 | 1                  | 4.47E-01 | 1                  | 4.47E-01 |                    |          |                    |          |
| CAMK1     | 3   | 1                  | 7.50E-01 | 1                  | 7.50E-01 | 1                  | 4.47E-01 | 1                  | 4.47E-01 |                    |          |                    |          |
| MLF1      | 3   | 2                  | 4.75E-01 | 2                  | 4.75E-01 | 1                  | 4.47E-01 | 1                  | 4.47E-01 | 1                  | 6.09E-01 | 1                  | 6.09E-01 |
| PAM       | 5   | 5                  | 8.17E-01 | 5                  | 8.17E-01 | 5                  | 5.28E-01 | 5                  | 5.28E-01 | 3                  | 4.47E-01 | 3                  | 4.47E-01 |
| PIK3IP1   | 22  | 1                  | 1.00E+00 | 1                  | 1.00E+00 | 1                  | 1.00E+00 | 1                  | 1.00E+00 | 1                  | 4.47E-01 | 1                  | 4.47E-01 |
| PLD3      | 19  | 2                  | 4.66E-01 | 2                  | 4.66E-01 | 1                  | 1.00E+00 | 1                  | 1.00E+00 | 2                  | 4.47E-01 | 2                  | 4.47E-01 |
| KRTAP13-4 | 21  | 2                  | 3.68E-01 | 2                  | 3.68E-01 | 1                  | 4.48E-01 | 1                  | 4.48E-01 | 1                  | 6.22E-01 | 1                  | 6.22E-01 |
| PGM1      | 1   | 3                  | 1.90E-02 | 3                  | 1.90E-02 | 1                  | 4.87E-01 | 1                  | 4.87E-01 | 2                  | 4.48E-01 | 2                  | 4.48E-01 |
| NDNF      | 4   | 1                  | 2.14E-01 | 1                  | 2.14E-01 | 1                  | 5.03E-01 | 1                  | 5.03E-01 | 1                  | 4.48E-01 | 1                  | 4.48E-01 |
| SLIRP     | 14  | 2                  | 2.94E-01 | 2                  | 2.94E-01 | 2                  | 5.86E-01 | 2                  | 5.86E-01 | 1                  | 4.48E-01 | 1                  | 4.48E-01 |
| RGL1      | 1   | 2                  | 2.31E-01 | 2                  | 2.31E-01 | 1                  | 4.48E-01 | 1                  | 4.48E-01 | 1                  | 7.02E-01 | 1                  | 7.02E-01 |
| NWD1      | 19  | 8                  | 4.00E-01 | 9                  | 4.01E-01 | 8                  | 7.15E-01 | 9                  | 7.15E-01 | 4                  | 4.48E-01 | 5                  | 4.49E-01 |
| PRKD3     | 2   | 2                  | 6.70E-01 | 2                  | 6.70E-01 | 2                  | 7.29E-01 | 2                  | 7.29E-01 | 1                  | 4.48E-01 | 1                  | 4.48E-01 |
| SULT1C3   | 2   | 4                  | 3.23E-01 | 5                  | 3.26E-01 | 4                  | 1.00E+00 | 5                  | 1.00E+00 | 1                  | 4.48E-01 | 2                  | 4.55E-01 |
| RGS12     | 4   | 9                  | 8.27E-01 | 9                  | 8.27E-01 | 8                  | 4.52E-01 | 8                  | 4.52E-01 | 5                  | 4.48E-01 | 5                  | 4.48E-01 |
| METAP1    | 4   | 1                  | 4.08E-01 | 1                  | 4.08E-01 | 1                  | 4.48E-01 | 1                  | 4.48E-01 |                    |          |                    |          |
| CFAP126   | 1   | 1                  | 4.08E-01 | 1                  | 4.08E-01 | 1                  | 4.48E-01 | 1                  | 4.48E-01 |                    |          |                    |          |
| ICT1      | 17  | 1                  | 1.00E+00 | 1                  | 1.00E+00 | 1                  | 1.00E+00 | 1                  | 1.00E+00 | 1                  | 4.48E-01 | 1                  | 4.48E-01 |
| RFX1      | 19  | 2                  | 5.17E-01 | 2                  | 5.17E-01 | 1                  | 4.48E-01 | 1                  | 4.48E-01 | 2                  | 4.65E-01 | 2                  | 4.65E-01 |
| RILP      | 17  | 1                  | 4.18E-01 | 1                  | 4.18E-01 | 1                  | 4.48E-01 | 1                  | 4.48E-01 |                    |          |                    |          |
| KLHDC7B   | 22  | 2                  | 8.01E-01 | 2                  | 8.01E-01 | 2                  | 4.48E-01 | 2                  | 4.48E-01 | 2                  | 6.35E-01 | 2                  | 6.35E-01 |
| PAN2      | 12  | 1                  | 7.83E-01 | 1                  | 7.83E-01 | 1                  | 4.66E-01 | 1                  | 4.66E-01 | 1                  | 4.48E-01 | 1                  | 4.48E-01 |
| PPFIBP1   | 12  | 4                  | 7.37E-02 | 4                  | 7.37E-02 | 3                  | 6.65E-01 | 3                  | 6.65E-01 | 1                  | 4.48E-01 | 1                  | 4.48E-01 |
| SLC44A5   | 1   | 2                  | 6.82E-01 | 2                  | 6.82E-01 | 2                  | 5.86E-01 | 2                  | 5.86E-01 | 1                  | 4.48E-01 | 1                  | 4.48E-01 |
| PRB3      | 12  | 1                  | 7.47E-01 | 1                  | 7.47E-01 | 1                  | 4.48E-01 | 1                  | 4.48E-01 |                    |          |                    |          |
| STAC      | 3   | 1                  | 4.11E-01 | 1                  | 4.11E-01 | 1                  | 4.48E-01 | 1                  | 4.48E-01 |                    |          |                    |          |
| AHR       | 7   | 1                  | 4.05E-01 | 1                  | 4.05E-01 | 1                  | 4.48E-01 | 1                  | 4.48E-01 |                    |          |                    |          |
| CDYL2     | 16  | 2                  | 3.21E-02 | 2                  | 3.21E-02 | 1                  | 5.28E-01 | 1                  | 5.28E-01 | 1                  | 4.48E-01 | 1                  | 4.48E-01 |
| GALNT15   | 3   | 3                  | 2.30E-01 | 3                  | 2.30E-01 | 2                  | 6.17E-01 | 2                  | 6.17E-01 | 2                  | 4.48E-01 | 2                  | 4.48E-01 |
| ZCCHC7    | 9   | 1                  | 7.47E-01 | 1                  | 7.47E-01 | 1                  | 4.48E-01 | 1                  | 4.48E-01 |                    |          |                    |          |

| SetID        | Chr | ADEH- vs NA        |          |                    |          | ADEH+ vs ADEH-     |          |                    |          | ADEH+ vs NA        |          |                    |          |
|--------------|-----|--------------------|----------|--------------------|----------|--------------------|----------|--------------------|----------|--------------------|----------|--------------------|----------|
|              |     | rarenovel          |          | all                |          | rarenovel          |          | all                |          | rarenovel          |          | all                |          |
|              |     | N variants in test | p-value  | N variants in test | p-value  | N variants in test | p-value  | N variants in test | p-value  | N variants in test | p-value  | N variants in test | p-value  |
| STX17        | 9   | 1                  | 7.47E-01 | 1                  | 7.47E-01 | 1                  | 4.48E-01 | 1                  | 4.48E-01 |                    |          |                    |          |
| KCNJ5        | 11  | 2                  | 3.60E-01 | 2                  | 3.60E-01 | 1                  | 4.48E-01 | 1                  | 4.48E-01 | 1                  | 6.04E-01 | 1                  | 6.04E-01 |
| ZNF843       | 16  | 1                  | 3.99E-01 | 1                  | 3.99E-01 | 1                  | 4.48E-01 | 1                  | 4.48E-01 |                    |          |                    |          |
| CCDC149      | 4   | 1                  | 1.00E+00 | 1                  | 1.00E+00 | 1                  | 4.48E-01 | 1                  | 4.48E-01 | 1                  | 6.03E-01 | 1                  | 6.03E-01 |
| KIAA0825     | 5   | 1                  | 1.89E-02 | 1                  | 1.89E-02 |                    |          |                    |          | 1                  | 4.48E-01 | 1                  | 4.48E-01 |
| COL6A1       | 21  | 3                  | 7.89E-01 | 3                  | 7.89E-01 | 3                  | 6.48E-01 | 3                  | 6.48E-01 | 1                  | 4.48E-01 | 1                  | 4.48E-01 |
| CD180        | 5   | 1                  | 2.19E-01 | 1                  | 2.19E-01 | 1                  | 5.28E-01 | 1                  | 5.28E-01 | 1                  | 4.48E-01 | 1                  | 4.48E-01 |
| OR6C75       | 12  | 1                  | 8.34E-01 | 1                  | 8.34E-01 | 1                  | 4.49E-01 | 1                  | 4.49E-01 | 1                  | 6.17E-01 | 1                  | 6.17E-01 |
| RPH3AL       | 17  | 2                  | 6.36E-01 | 2                  | 6.36E-01 | 2                  | 5.10E-01 | 2                  | 5.10E-01 | 1                  | 4.49E-01 | 1                  | 4.49E-01 |
| VN1R1        | 19  | 1                  | 4.08E-01 | 1                  | 4.08E-01 | 1                  | 4.49E-01 | 1                  | 4.49E-01 |                    |          |                    |          |
| PKNOX2       | 11  | 1                  | 2.07E-01 | 1                  | 2.07E-01 | 1                  | 4.91E-01 | 1                  | 4.91E-01 | 1                  | 4.49E-01 | 1                  | 4.49E-01 |
| MIXL1        | 1   | 1                  | 1.93E-02 | 1                  | 1.93E-02 |                    |          |                    |          | 1                  | 4.49E-01 | 1                  | 4.49E-01 |
| SDCCAG3      | 9   | 1                  | 4.15E-01 | 1                  | 4.15E-01 | 1                  | 4.49E-01 | 1                  | 4.49E-01 |                    |          |                    |          |
| GAP43        | 3   | 1                  | 6.30E-01 | 1                  | 6.30E-01 | 1                  | 4.49E-01 | 1                  | 4.49E-01 | 1                  | 6.11E-01 | 1                  | 6.11E-01 |
| FKRP         | 19  | 1                  | 7.35E-01 | 1                  | 7.35E-01 | 1                  | 4.49E-01 | 1                  | 4.49E-01 |                    |          |                    |          |
| ZNF426       | 19  | 2                  | 3.88E-01 | 2                  | 3.88E-01 | 1                  | 4.49E-01 | 1                  | 4.49E-01 | 1                  | 6.13E-01 | 1                  | 6.13E-01 |
| RIPK1        | 6   | 3                  | 1.20E-01 | 3                  | 1.20E-01 | 1                  | 4.49E-01 | 1                  | 4.49E-01 | 2                  | 6.11E-01 | 2                  | 6.11E-01 |
| INO80D       | 2   | 1                  | 1.76E-01 | 1                  | 1.76E-01 | 1                  | 4.49E-01 | 1                  | 4.49E-01 | 1                  | 4.57E-01 | 1                  | 4.57E-01 |
| MEF2B        | 19  | 2                  | 4.16E-01 | 2                  | 4.16E-01 | 1                  | 4.49E-01 | 1                  | 4.49E-01 | 1                  | 6.04E-01 | 1                  | 6.04E-01 |
| MEF2B-NB-MEF | 19  | 2                  | 4.16E-01 | 2                  | 4.16E-01 | 1                  | 4.49E-01 | 1                  | 4.49E-01 | 1                  | 6.04E-01 | 1                  | 6.04E-01 |
| PITPNB       | 22  | 1                  | 7.35E-01 | 1                  | 7.35E-01 | 1                  | 4.49E-01 | 1                  | 4.49E-01 |                    |          |                    |          |
| C10orf62     | 10  | 1                  | 4.09E-01 | 1                  | 4.09E-01 | 1                  | 4.49E-01 | 1                  | 4.49E-01 |                    |          |                    |          |
| TRAPPC8      | 18  | 3                  | 1.15E-01 | 3                  | 1.15E-01 | 3                  | 4.49E-01 | 3                  | 4.49E-01 |                    |          |                    |          |
| ZNF267       | 16  | 1                  | 1.81E-02 | 1                  | 1.81E-02 |                    |          |                    |          | 1                  | 4.49E-01 | 1                  | 4.49E-01 |
| GIT2         | 12  | 2                  | 3.65E-01 | 2                  | 3.65E-01 | 1                  | 4.49E-01 | 1                  | 4.49E-01 | 1                  | 6.60E-01 | 1                  | 6.60E-01 |
| BATF2        | 11  | 1                  | 1.79E-02 | 1                  | 1.79E-02 |                    |          |                    |          | 1                  | 4.49E-01 | 1                  | 4.49E-01 |
| ALKBH3       | 11  | 2                  | 7.72E-01 | 2                  | 7.72E-01 | 2                  | 7.06E-01 | 2                  | 7.06E-01 | 1                  | 4.49E-01 | 1                  | 4.49E-01 |
| EEPD1        | 7   | 1                  | 2.17E-02 | 1                  | 2.17E-02 |                    |          |                    |          | 1                  | 4.49E-01 | 1                  | 4.49E-01 |
| ARL6IP5      | 3   | 1                  | 1.00E+00 | 1                  | 1.00E+00 | 1                  | 1.00E+00 | 1                  | 1.00E+00 | 1                  | 4.49E-01 | 1                  | 4.49E-01 |
| THAP6        | 4   | 1                  | 3.96E-01 | 1                  | 3.96E-01 | 1                  | 4.49E-01 | 1                  | 4.49E-01 |                    |          |                    |          |
| SRSF4        | 1   | 4                  | 7.43E-02 | 4                  | 7.43E-02 | 3                  | 7.87E-01 | 3                  | 7.87E-01 | 1                  | 4.49E-01 | 1                  | 4.49E-01 |
| NOG          | 17  | 1                  | 8.65E-01 | 1                  | 8.65E-01 | 1                  | 4.49E-01 | 1                  | 4.49E-01 | 1                  | 6.36E-01 | 1                  | 6.36E-01 |
| ZNF439       | 19  | 2                  | 6.98E-01 | 2                  | 6.98E-01 | 1                  | 4.49E-01 | 1                  | 4.49E-01 | 2                  | 6.32E-01 | 2                  | 6.32E-01 |
| KLHDC7A      | 1   | 2                  | 2.43E-01 | 3                  | 1.49E-01 | 1                  | 4.49E-01 | 2                  | 4.81E-01 | 2                  | 6.10E-01 | 3                  | 7.71E-01 |
| IDH3A        | 15  | 2                  | 3.85E-01 | 2                  | 3.85E-01 | 1                  | 4.49E-01 | 1                  | 4.49E-01 | 1                  | 6.30E-01 | 1                  | 6.30E-01 |
| RCSL1        | 1   | 1                  | 7.39E-01 | 1                  | 7.39E-01 | 1                  | 4.49E-01 | 1                  | 4.49E-01 |                    |          |                    |          |
| KCNH2        | 7   | 2                  | 4.90E-01 | 2                  | 4.90E-01 | 1                  | 4.49E-01 | 1                  | 4.49E-01 | 1                  | 6.44E-01 | 1                  | 6.44E-01 |
| TGFBR2       | 3   | 1                  | 7.39E-01 | 1                  | 7.39E-01 | 1                  | 4.49E-01 | 1                  | 4.49E-01 |                    |          |                    |          |
| WASF1        | 6   | 1                  | 7.39E-01 | 1                  | 7.39E-01 | 1                  | 4.49E-01 | 1                  | 4.49E-01 |                    |          |                    |          |
| WNT8A        | 5   | 1                  | 7.39E-01 | 1                  | 7.39E-01 | 1                  | 4.49E-01 | 1                  | 4.49E-01 |                    |          |                    |          |
| CASQ2        | 1   | 2                  | 4.24E-01 | 2                  | 4.24E-01 | 1                  | 4.49E-01 | 1                  | 4.49E-01 | 1                  | 6.30E-01 | 1                  | 6.30E-01 |
| AVL9         | 7   | 1                  | 7.39E-01 | 1                  | 7.39E-01 | 1                  | 4.49E-01 | 1                  | 4.49E-01 |                    |          |                    |          |
| NLK          | 17  | 1                  | 7.39E-01 | 1                  | 7.39E-01 | 1                  | 4.49E-01 | 1                  | 4.49E-01 |                    |          |                    |          |
| PCDHB14      | 5   | 2                  | 4.69E-01 | 2                  | 4.69E-01 | 1                  | 4.49E-01 | 1                  | 4.49E-01 | 1                  | 5.98E-01 | 1                  | 5.98E-01 |
| CD207        | 2   | 2                  | 3.21E-02 | 2                  | 3.21E-02 | 1                  | 5.10E-01 | 1                  | 5.10E-01 | 1                  | 4.49E-01 | 1                  | 4.49E-01 |
| SRGN         | 10  | 2                  | 3.32E-01 | 2                  | 3.32E-01 | 1                  | 4.49E-01 | 1                  | 4.49E-01 | 1                  | 5.93E-01 | 1                  | 5.93E-01 |
| MUTYH        | 1   | 7                  | 1.00E+00 | 7                  | 1.00E+00 | 6                  | 4.49E-01 | 6                  | 4.49E-01 | 5                  | 5.66E-01 | 5                  | 5.66E-01 |
| HAGHL        | 16  | 1                  | 3.99E-01 | 1                  | 3.99E-01 | 1                  | 4.49E-01 | 1                  | 4.49E-01 |                    |          |                    |          |

| SetID    | Chr | ADEH- vs NA        |          |                    |          | ADEH+ vs ADEH-     |          |                    |          | ADEH+ vs NA        |          |                    |          |
|----------|-----|--------------------|----------|--------------------|----------|--------------------|----------|--------------------|----------|--------------------|----------|--------------------|----------|
|          |     | rarenovel          |          | all                |          | rarenovel          |          | all                |          | rarenovel          |          | all                |          |
|          |     | N variants in test | p-value  | N variants in test | p-value  | N variants in test | p-value  | N variants in test | p-value  | N variants in test | p-value  | N variants in test | p-value  |
| OR6K6    | 1   | 4                  | 6.33E-01 | 4                  | 6.33E-01 | 4                  | 4.65E-01 | 4                  | 4.65E-01 | 1                  | 4.49E-01 | 1                  | 4.49E-01 |
| NAV3     | 12  | 1                  | 4.12E-01 | 1                  | 4.12E-01 | 1                  | 4.49E-01 | 1                  | 4.49E-01 |                    |          |                    |          |
| NME8     | 7   |                    |          | 1                  | 6.83E-01 |                    |          | 1                  | 4.49E-01 |                    |          | 1                  | 6.16E-01 |
| DTD1     | 20  | 1                  | 4.15E-01 | 1                  | 4.15E-01 | 1                  | 4.49E-01 | 1                  | 4.49E-01 |                    |          |                    |          |
| MRPL11   | 11  | 1                  | 8.96E-01 | 1                  | 8.96E-01 | 1                  | 4.49E-01 | 1                  | 4.49E-01 | 1                  | 6.85E-01 | 1                  | 6.85E-01 |
| CHTF18   | 16  | 8                  | 6.11E-01 | 8                  | 6.11E-01 | 7                  | 4.49E-01 | 7                  | 4.49E-01 | 2                  | 6.39E-01 | 2                  | 6.39E-01 |
| LRCH1    | 13  | 1                  | 8.90E-01 | 1                  | 8.90E-01 | 1                  | 4.49E-01 | 1                  | 4.49E-01 | 1                  | 6.44E-01 | 1                  | 6.44E-01 |
| KLLN     | 10  | 1                  | 8.98E-01 | 1                  | 8.98E-01 | 1                  | 4.49E-01 | 1                  | 4.49E-01 | 1                  | 6.30E-01 | 1                  | 6.30E-01 |
| ZNF608   | 5   | 5                  | 1.14E-01 | 5                  | 1.14E-01 | 4                  | 6.44E-01 | 4                  | 6.44E-01 | 1                  | 4.49E-01 | 1                  | 4.49E-01 |
| NDST2    | 10  | 4                  | 8.22E-02 | 4                  | 8.22E-02 | 3                  | 7.19E-01 | 3                  | 7.19E-01 | 1                  | 4.49E-01 | 1                  | 4.49E-01 |
| CHRNE    | 17  | 2                  | 3.56E-01 | 2                  | 3.56E-01 | 1                  | 4.50E-01 | 1                  | 4.50E-01 | 1                  | 6.13E-01 | 1                  | 6.13E-01 |
| ADAM28   | 8   | 2                  | 2.59E-01 | 2                  | 2.59E-01 | 1                  | 4.50E-01 | 1                  | 4.50E-01 | 2                  | 4.70E-01 | 2                  | 4.70E-01 |
| PANX2    | 22  | 2                  | 3.07E-02 | 2                  | 3.07E-02 | 1                  | 5.02E-01 | 1                  | 5.02E-01 | 1                  | 4.50E-01 | 1                  | 4.50E-01 |
| SUPT4H1  | 17  | 1                  | 1.68E-02 | 1                  | 1.68E-02 |                    |          |                    |          | 1                  | 4.50E-01 | 1                  | 4.50E-01 |
| ZNF131   | 5   | 1                  | 1.77E-02 | 1                  | 1.77E-02 |                    |          |                    |          | 1                  | 4.50E-01 | 1                  | 4.50E-01 |
| STYK1    | 12  | 1                  | 4.01E-01 | 1                  | 4.01E-01 | 1                  | 4.50E-01 | 1                  | 4.50E-01 |                    |          |                    |          |
| CCDC17   | 1   | 2                  | 3.42E-01 | 2                  | 3.42E-01 | 2                  | 6.23E-01 | 2                  | 6.23E-01 | 1                  | 4.50E-01 | 1                  | 4.50E-01 |
| GPR108   | 19  | 2                  | 6.35E-01 | 2                  | 6.35E-01 | 1                  | 4.50E-01 | 1                  | 4.50E-01 | 2                  | 6.54E-01 | 2                  | 6.54E-01 |
| TOR3A    | 1   | 3                  | 3.71E-01 | 3                  | 3.71E-01 | 2                  | 1.00E+00 | 2                  | 1.00E+00 | 2                  | 4.50E-01 | 2                  | 4.50E-01 |
| KCNA10   | 1   | 3                  | 8.68E-01 | 3                  | 8.68E-01 | 3                  | 4.73E-01 | 3                  | 4.73E-01 | 1                  | 4.50E-01 | 1                  | 4.50E-01 |
| KRTAP5-1 | 11  | 1                  | 2.20E-01 | 1                  | 2.20E-01 | 1                  | 4.56E-01 | 1                  | 4.56E-01 | 1                  | 4.50E-01 | 1                  | 4.50E-01 |
| TFAP2E   | 1   | 3                  | 1.00E+00 | 3                  | 1.00E+00 | 3                  | 4.58E-01 | 3                  | 4.58E-01 | 1                  | 4.50E-01 | 1                  | 4.50E-01 |
| GBX1     | 7   | 1                  | 4.18E-01 | 1                  | 4.18E-01 | 1                  | 4.50E-01 | 1                  | 4.50E-01 |                    |          |                    |          |
| UCN2     | 3   | 2                  | 3.26E-01 | 2                  | 3.26E-01 | 1                  | 4.50E-01 | 1                  | 4.50E-01 | 1                  | 5.93E-01 | 1                  | 5.93E-01 |
| EIF2AK1  | 7   | 1                  | 4.09E-01 | 1                  | 4.09E-01 | 1                  | 4.50E-01 | 1                  | 4.50E-01 |                    |          |                    |          |
| BAZ2A    | 12  | 2                  | 4.18E-01 | 2                  | 4.18E-01 | 1                  | 4.50E-01 | 1                  | 4.50E-01 | 1                  | 6.27E-01 | 1                  | 6.27E-01 |
| GIPC1    | 19  | 1                  | 7.42E-01 | 1                  | 7.42E-01 | 1                  | 4.50E-01 | 1                  | 4.50E-01 |                    |          |                    |          |
| TTC23L   | 5   | 2                  | 3.66E-01 | 2                  | 3.66E-01 | 1                  | 4.50E-01 | 1                  | 4.50E-01 | 1                  | 6.81E-01 | 1                  | 6.81E-01 |
| SPRY1    | 4   | 1                  | 7.42E-01 | 1                  | 7.42E-01 | 1                  | 4.50E-01 | 1                  | 4.50E-01 |                    |          |                    |          |
| SWI5     | 9   | 1                  | 7.42E-01 | 1                  | 7.42E-01 | 1                  | 4.50E-01 | 1                  | 4.50E-01 |                    |          |                    |          |
| OR4K5    | 14  | 3                  | 1.67E-01 | 3                  | 1.67E-01 | 1                  | 4.50E-01 | 1                  | 4.50E-01 | 2                  | 6.63E-01 | 2                  | 6.63E-01 |
| PHF7     | 3   | 1                  | 7.42E-01 | 1                  | 7.42E-01 | 1                  | 4.50E-01 | 1                  | 4.50E-01 |                    |          |                    |          |
| CDKN2AIP | 4   | 1                  | 7.42E-01 | 1                  | 7.42E-01 | 1                  | 4.50E-01 | 1                  | 4.50E-01 |                    |          |                    |          |
| PRPF3    | 1   | 1                  | 7.42E-01 | 1                  | 7.42E-01 | 1                  | 4.50E-01 | 1                  | 4.50E-01 |                    |          |                    |          |
| ZNF697   | 1   | 1                  | 7.42E-01 | 1                  | 7.42E-01 | 1                  | 4.50E-01 | 1                  | 4.50E-01 |                    |          |                    |          |
| DHX36    | 3   | 2                  | 4.15E-01 | 2                  | 4.15E-01 | 1                  | 4.50E-01 | 1                  | 4.50E-01 | 1                  | 6.42E-01 | 1                  | 6.42E-01 |
| RNASE1   | 14  | 1                  | 1.65E-01 | 1                  | 1.65E-01 | 1                  | 4.50E-01 | 1                  | 4.50E-01 | 1                  | 4.51E-01 | 1                  | 4.51E-01 |
| PTPRN    | 2   | 1                  | 7.33E-01 | 1                  | 7.33E-01 | 1                  | 4.50E-01 | 1                  | 4.50E-01 |                    |          |                    |          |
| RTN2     | 19  | 1                  | 7.33E-01 | 1                  | 7.33E-01 | 1                  | 4.50E-01 | 1                  | 4.50E-01 |                    |          |                    |          |
| ITPK1    | 14  | 1                  | 7.33E-01 | 1                  | 7.33E-01 | 1                  | 4.50E-01 | 1                  | 4.50E-01 |                    |          |                    |          |
| CCDC61   | 19  | 2                  | 4.35E-01 | 2                  | 4.35E-01 | 1                  | 4.50E-01 | 1                  | 4.50E-01 | 1                  | 6.04E-01 | 1                  | 6.04E-01 |
| B3GNT8   | 19  | 2                  | 5.08E-01 | 2                  | 5.08E-01 | 1                  | 4.50E-01 | 1                  | 4.50E-01 | 1                  | 6.17E-01 | 1                  | 6.17E-01 |
| PTGR2    | 14  | 1                  | 7.33E-01 | 1                  | 7.33E-01 | 1                  | 4.50E-01 | 1                  | 4.50E-01 |                    |          |                    |          |
| ST8SIA2  | 15  | 1                  | 7.33E-01 | 1                  | 7.33E-01 | 1                  | 4.50E-01 | 1                  | 4.50E-01 |                    |          |                    |          |
| THNSL2   | 2   | 1                  | 7.33E-01 | 1                  | 7.33E-01 | 1                  | 4.50E-01 | 1                  | 4.50E-01 |                    |          |                    |          |
| WIPI1    | 17  | 2                  | 3.59E-01 | 2                  | 3.59E-01 | 1                  | 4.50E-01 | 1                  | 4.50E-01 | 1                  | 5.81E-01 | 1                  | 5.81E-01 |
| LRRC30   | 18  | 2                  | 5.24E-01 | 2                  | 5.24E-01 | 2                  | 6.20E-01 | 2                  | 6.20E-01 | 2                  | 4.50E-01 | 2                  | 4.50E-01 |
| DENND4B  | 1   | 1                  | 1.79E-02 | 1                  | 1.79E-02 |                    |          |                    |          | 1                  | 4.50E-01 | 1                  | 4.50E-01 |

| SetID     | Chr | ADEH- vs NA        |          |                    |          | ADEH+ vs ADEH-     |          |                    |          | ADEH+ vs NA        |          |                    |          |
|-----------|-----|--------------------|----------|--------------------|----------|--------------------|----------|--------------------|----------|--------------------|----------|--------------------|----------|
|           |     | rare novel         |          | all                |          | rare novel         |          | all                |          | rare novel         |          | all                |          |
|           |     | N variants in test | p-value  | N variants in test | p-value  | N variants in test | p-value  | N variants in test | p-value  | N variants in test | p-value  | N variants in test | p-value  |
| ASL       | 7   | 2                  | 1.00E+00 | 2                  | 1.00E+00 | 2                  | 5.99E-01 | 2                  | 5.99E-01 | 1                  | 4.50E-01 | 1                  | 4.50E-01 |
| PRRG2     | 19  | 1                  | 4.13E-01 | 1                  | 4.13E-01 | 1                  | 4.50E-01 | 1                  | 4.50E-01 |                    |          |                    |          |
| DOCK9     | 13  | 3                  | 6.50E-02 | 3                  | 6.50E-02 | 1                  | 4.50E-01 | 1                  | 4.50E-01 | 3                  | 5.23E-01 | 3                  | 5.23E-01 |
| MMP25     | 16  | 2                  | 4.28E-01 | 2                  | 4.28E-01 | 1                  | 4.50E-01 | 1                  | 4.50E-01 | 1                  | 6.34E-01 | 1                  | 6.34E-01 |
| VIPR1     | 3   | 2                  | 2.34E-01 | 2                  | 2.34E-01 | 1                  | 4.50E-01 | 1                  | 4.50E-01 | 1                  | 5.81E-01 | 1                  | 5.81E-01 |
| SEL1L3    | 4   | 2                  | 2.36E-01 | 2                  | 2.36E-01 | 1                  | 4.50E-01 | 1                  | 4.50E-01 | 2                  | 4.56E-01 | 2                  | 4.56E-01 |
| LHX8      | 1   | 2                  | 3.42E-02 | 2                  | 3.42E-02 | 1                  | 5.37E-01 | 1                  | 5.37E-01 | 1                  | 4.50E-01 | 1                  | 4.50E-01 |
| SNX13     | 7   | 1                  | 2.06E-02 | 1                  | 2.06E-02 |                    |          |                    |          | 1                  | 4.50E-01 | 1                  | 4.50E-01 |
| BTN2A1    | 6   | 2                  | 7.55E-02 | 2                  | 7.55E-02 | 1                  | 4.69E-01 | 1                  | 4.69E-01 | 2                  | 4.51E-01 | 2                  | 4.51E-01 |
| OLA1      | 2   | 1                  | 1.96E-02 | 1                  | 1.96E-02 |                    |          |                    |          | 1                  | 4.51E-01 | 1                  | 4.51E-01 |
| UNC5B     | 10  | 5                  | 5.61E-01 | 5                  | 5.61E-01 | 5                  | 5.19E-01 | 5                  | 5.19E-01 | 1                  | 4.51E-01 | 1                  | 4.51E-01 |
| TSSK2     | 22  | 2                  | 6.55E-01 | 2                  | 6.55E-01 | 1                  | 4.51E-01 | 1                  | 4.51E-01 | 2                  | 6.28E-01 | 2                  | 6.28E-01 |
| SLC4A8    | 12  | 2                  | 6.48E-01 | 2                  | 6.48E-01 | 1                  | 4.51E-01 | 1                  | 4.51E-01 | 2                  | 6.48E-01 | 2                  | 6.48E-01 |
| KDM5A     | 12  | 3                  | 2.45E-01 | 3                  | 2.45E-01 | 3                  | 4.51E-01 | 3                  | 4.51E-01 | 2                  | 4.60E-01 | 2                  | 4.60E-01 |
| TYSND1    | 10  | 1                  | 4.16E-01 | 1                  | 4.16E-01 | 1                  | 4.51E-01 | 1                  | 4.51E-01 |                    |          |                    |          |
| CCDC69    | 5   | 2                  | 7.19E-02 | 2                  | 7.19E-02 | 1                  | 5.46E-01 | 1                  | 5.46E-01 | 2                  | 4.51E-01 | 2                  | 4.51E-01 |
| C12orf50  | 12  | 2                  | 1.00E+00 | 2                  | 1.00E+00 | 2                  | 4.71E-01 | 2                  | 4.71E-01 | 1                  | 4.51E-01 | 1                  | 4.51E-01 |
| ADAMTS18  | 16  | 7                  | 9.15E-02 | 7                  | 9.15E-02 | 7                  | 4.51E-01 | 7                  | 4.51E-01 |                    |          |                    |          |
| ECEL1     | 2   | 1                  | 1.00E+00 | 1                  | 1.00E+00 | 1                  | 4.51E-01 | 1                  | 4.51E-01 | 1                  | 6.25E-01 | 1                  | 6.25E-01 |
| SGK2      | 20  | 3                  | 7.64E-01 | 3                  | 7.64E-01 | 3                  | 5.09E-01 | 3                  | 5.09E-01 | 1                  | 4.51E-01 | 1                  | 4.51E-01 |
| SLC38A11  | 2   | 3                  | 1.10E-01 | 3                  | 1.10E-01 | 3                  | 4.51E-01 | 3                  | 4.51E-01 |                    |          |                    |          |
| MUC5B     | 11  | 17                 | 5.85E-01 | 17                 | 5.85E-01 | 14                 | 7.82E-01 | 14                 | 7.82E-01 | 9                  | 4.51E-01 | 9                  | 4.51E-01 |
| MMAB      | 12  | 1                  | 1.76E-02 | 1                  | 1.76E-02 |                    |          |                    |          | 1                  | 4.51E-01 | 1                  | 4.51E-01 |
| TMEM44    | 3   | 5                  | 4.32E-01 | 5                  | 4.32E-01 | 5                  | 4.51E-01 | 5                  | 4.51E-01 | 1                  | 5.95E-01 | 1                  | 5.95E-01 |
| KRTAP13-1 | 21  | 1                  | 7.87E-01 | 1                  | 7.87E-01 | 1                  | 1.00E+00 | 1                  | 1.00E+00 | 1                  | 4.51E-01 | 1                  | 4.51E-01 |
| CDK5RAP1  | 20  | 1                  | 2.14E-01 | 1                  | 2.14E-01 | 1                  | 4.58E-01 | 1                  | 4.58E-01 | 1                  | 4.51E-01 | 1                  | 4.51E-01 |
| MYLK4     | 6   | 2                  | 3.96E-01 | 2                  | 3.96E-01 | 2                  | 6.41E-01 | 2                  | 6.41E-01 | 1                  | 4.51E-01 | 1                  | 4.51E-01 |
| WNK4      | 17  | 8                  | 3.51E-01 | 8                  | 3.51E-01 | 5                  | 4.51E-01 | 5                  | 4.51E-01 | 5                  | 1.00E+00 | 5                  | 1.00E+00 |
| ATE1      | 10  | 1                  | 2.18E-02 | 1                  | 2.18E-02 |                    |          |                    |          | 1                  | 4.51E-01 | 1                  | 4.51E-01 |
| RAB44     | 6   | 1                  | 4.08E-01 | 1                  | 4.08E-01 | 1                  | 4.51E-01 | 1                  | 4.51E-01 |                    |          |                    |          |
| LRRC26    | 9   | 2                  | 4.61E-01 | 2                  | 4.61E-01 | 1                  | 4.51E-01 | 1                  | 4.51E-01 | 1                  | 6.56E-01 | 1                  | 6.56E-01 |
| OR6Q1     | 11  | 2                  | 4.62E-01 | 2                  | 4.62E-01 | 1                  | 4.51E-01 | 1                  | 4.51E-01 | 1                  | 6.46E-01 | 1                  | 6.46E-01 |
| ANKRD13B  | 17  | 1                  | 7.47E-01 | 1                  | 7.47E-01 | 1                  | 4.51E-01 | 1                  | 4.51E-01 |                    |          |                    |          |
| P2RY12    | 3   | 1                  | 7.47E-01 | 1                  | 7.47E-01 | 1                  | 4.51E-01 | 1                  | 4.51E-01 |                    |          |                    |          |
| PLEKHB2   | 2   | 1                  | 7.47E-01 | 1                  | 7.47E-01 | 1                  | 4.51E-01 | 1                  | 4.51E-01 |                    |          |                    |          |
| TRAF5     | 1   | 1                  | 6.61E-01 | 1                  | 6.61E-01 | 1                  | 4.51E-01 | 1                  | 4.51E-01 | 1                  | 6.10E-01 | 1                  | 6.10E-01 |
| C12orf42  | 12  | 2                  | 2.65E-01 | 2                  | 2.65E-01 | 2                  | 6.36E-01 | 2                  | 6.36E-01 | 2                  | 4.51E-01 | 2                  | 4.51E-01 |
| GRHL1     | 2   | 1                  | 7.50E-01 | 1                  | 7.50E-01 | 1                  | 4.51E-01 | 1                  | 4.51E-01 |                    |          |                    |          |
| OR4N5     | 14  | 1                  | 7.50E-01 | 1                  | 7.50E-01 | 1                  | 4.51E-01 | 1                  | 4.51E-01 |                    |          |                    |          |
| KCNK15    | 20  | 1                  | 7.50E-01 | 1                  | 7.50E-01 | 1                  | 4.51E-01 | 1                  | 4.51E-01 |                    |          |                    |          |
| GCSAM     | 3   | 1                  | 7.50E-01 | 1                  | 7.50E-01 | 1                  | 4.51E-01 | 1                  | 4.51E-01 |                    |          |                    |          |
| ATAD2B    | 2   | 1                  | 7.50E-01 | 1                  | 7.50E-01 | 1                  | 4.51E-01 | 1                  | 4.51E-01 |                    |          |                    |          |
| AZU1      | 19  | 1                  | 6.89E-01 | 2                  | 5.08E-01 | 1                  | 4.51E-01 | 2                  | 5.55E-01 | 1                  | 6.33E-01 | 2                  | 7.55E-01 |
| FOXA2     | 20  | 1                  | 7.50E-01 | 1                  | 7.50E-01 | 1                  | 4.51E-01 | 1                  | 4.51E-01 |                    |          |                    |          |
| KCTD21    | 11  | 1                  | 7.50E-01 | 1                  | 7.50E-01 | 1                  | 4.51E-01 | 1                  | 4.51E-01 |                    |          |                    |          |
| C3orf62   | 3   | 2                  | 6.08E-01 | 2                  | 6.08E-01 | 1                  | 4.51E-01 | 1                  | 4.51E-01 | 2                  | 6.17E-01 | 2                  | 6.17E-01 |
| SLC13A2   | 17  | 3                  | 2.10E-01 | 3                  | 2.10E-01 | 2                  | 6.40E-01 | 2                  | 6.40E-01 | 2                  | 4.51E-01 | 2                  | 4.51E-01 |
| MXRA8     | 1   | 2                  | 1.00E+00 | 2                  | 1.00E+00 | 2                  | 1.00E+00 | 2                  | 1.00E+00 | 1                  | 4.51E-01 | 1                  | 4.51E-01 |

| SetID    | Chr | ADEH- vs NA        |          |                    |          | ADEH+ vs ADEH-     |          |                    |          | ADEH+ vs NA        |          |                    |          |
|----------|-----|--------------------|----------|--------------------|----------|--------------------|----------|--------------------|----------|--------------------|----------|--------------------|----------|
|          |     | rare novel         |          | all                |          | rare novel         |          | all                |          | rare novel         |          | all                |          |
|          |     | N variants in test | p-value  | N variants in test | p-value  | N variants in test | p-value  | N variants in test | p-value  | N variants in test | p-value  | N variants in test | p-value  |
| GABRD    | 1   | 1                  | 2.32E-01 | 1                  | 2.32E-01 | 1                  | 4.51E-01 | 1                  | 4.51E-01 |                    |          |                    |          |
| RBM6     | 3   | 6                  | 7.75E-01 | 6                  | 7.75E-01 | 4                  | 4.51E-01 | 4                  | 4.51E-01 | 3                  | 5.02E-01 | 3                  | 5.02E-01 |
| OR1A1    | 17  | 2                  | 5.70E-01 | 3                  | 5.70E-01 | 2                  | 6.42E-01 | 3                  | 6.42E-01 |                    |          | 1                  | 4.51E-01 |
| SAMD4A   | 14  | 3                  | 5.01E-02 | 3                  | 5.01E-02 | 2                  | 6.11E-01 | 2                  | 6.11E-01 | 1                  | 4.51E-01 | 1                  | 4.51E-01 |
| CDCP2    | 1   | 2                  | 3.67E-01 | 2                  | 3.67E-01 | 1                  | 4.51E-01 | 1                  | 4.51E-01 | 1                  | 6.13E-01 | 1                  | 6.13E-01 |
| MRPL23   | 11  | 1                  | 5.03E-01 | 1                  | 5.03E-01 | 1                  | 4.52E-01 | 1                  | 4.52E-01 | 1                  | 4.69E-01 | 1                  | 4.69E-01 |
| BCL2L13  | 22  | 2                  | 6.33E-03 | 2                  | 6.33E-03 |                    |          |                    |          | 2                  | 4.52E-01 | 2                  | 4.52E-01 |
| C17orf64 | 17  | 1                  | 7.67E-01 | 1                  | 7.67E-01 | 1                  | 5.08E-01 | 1                  | 5.08E-01 | 1                  | 4.52E-01 | 1                  | 4.52E-01 |
| PRTFDC1  | 10  | 4                  | 1.01E-01 | 4                  | 1.01E-01 | 3                  | 5.57E-01 | 3                  | 5.57E-01 | 1                  | 4.52E-01 | 1                  | 4.52E-01 |
| POLL     | 10  | 3                  | 5.06E-01 | 3                  | 5.06E-01 | 3                  | 5.82E-01 | 3                  | 5.82E-01 | 1                  | 4.52E-01 | 1                  | 4.52E-01 |
| TRMU     | 22  | 2                  | 3.74E-01 | 3                  | 4.49E-01 | 2                  | 5.97E-01 | 3                  | 5.74E-01 | 1                  | 4.52E-01 | 2                  | 7.45E-01 |
| RFT1     | 3   | 4                  | 7.98E-01 | 4                  | 7.98E-01 | 4                  | 4.56E-01 | 4                  | 4.56E-01 | 1                  | 4.52E-01 | 1                  | 4.52E-01 |
| ZNF737   | 19  | 3                  | 3.70E-01 | 3                  | 3.70E-01 | 3                  | 1.00E+00 | 3                  | 1.00E+00 | 1                  | 4.52E-01 | 1                  | 4.52E-01 |
| SRP72    | 4   | 1                  | 1.00E+00 | 1                  | 1.00E+00 | 1                  | 4.52E-01 | 1                  | 4.52E-01 | 1                  | 6.32E-01 | 1                  | 6.32E-01 |
| MTG2     | 20  | 2                  | 7.20E-01 | 2                  | 7.20E-01 | 2                  | 7.12E-01 | 2                  | 7.12E-01 | 1                  | 4.52E-01 | 1                  | 4.52E-01 |
| ERF      | 19  | 1                  | 7.44E-01 | 1                  | 7.44E-01 | 1                  | 4.52E-01 | 1                  | 4.52E-01 |                    |          |                    |          |
| KHDC1    | 6   | 1                  | 6.68E-01 | 2                  | 8.55E-01 | 1                  | 4.52E-01 | 2                  | 5.31E-01 | 1                  | 6.41E-01 | 2                  | 6.05E-01 |
| PRSS48   | 4   | 1                  | 6.86E-01 | 3                  | 4.21E-01 | 1                  | 4.52E-01 | 3                  | 1.00E+00 | 1                  | 6.18E-01 | 3                  | 1.00E+00 |
| ANKRD13C | 1   | 1                  | 7.44E-01 | 1                  | 7.44E-01 | 1                  | 4.52E-01 | 1                  | 4.52E-01 |                    |          |                    |          |
| RBM34    | 1   | 1                  | 7.06E-01 | 1                  | 7.06E-01 | 1                  | 4.52E-01 | 1                  | 4.52E-01 | 1                  | 6.75E-01 | 1                  | 6.75E-01 |
| GALT     | 9   | 2                  | 7.04E-01 | 2                  | 7.04E-01 | 2                  | 6.81E-01 | 2                  | 6.81E-01 | 1                  | 4.52E-01 | 1                  | 4.52E-01 |
| ERICH1   | 8   | 1                  | 4.03E-01 | 1                  | 4.03E-01 | 1                  | 4.52E-01 | 1                  | 4.52E-01 |                    |          |                    |          |
| ADCK2    | 7   | 3                  | 4.63E-02 | 3                  | 4.63E-02 | 2                  | 6.14E-01 | 2                  | 6.14E-01 | 1                  | 4.52E-01 | 1                  | 4.52E-01 |
| GOLIM4   | 3   | 2                  | 3.35E-01 | 2                  | 3.35E-01 | 2                  | 6.13E-01 | 2                  | 6.13E-01 | 1                  | 4.52E-01 | 1                  | 4.52E-01 |
| LRRC1    | 6   | 1                  | 3.92E-01 | 1                  | 3.92E-01 | 1                  | 4.52E-01 | 1                  | 4.52E-01 |                    |          |                    |          |
| SIK2     | 11  | 2                  | 3.43E-01 | 2                  | 3.43E-01 | 1                  | 4.52E-01 | 1                  | 4.52E-01 | 1                  | 6.77E-01 | 1                  | 6.77E-01 |
| CNTRL    | 9   | 7                  | 3.92E-02 | 7                  | 3.92E-02 | 4                  | 4.97E-01 | 4                  | 4.97E-01 | 3                  | 4.52E-01 | 3                  | 4.52E-01 |
| PPM1M    | 3   | 1                  | 5.31E-01 | 1                  | 5.31E-01 | 1                  | 4.52E-01 | 1                  | 4.52E-01 | 1                  | 4.55E-01 | 1                  | 4.55E-01 |
| PERM1    | 1   | 3                  | 4.00E-01 | 3                  | 4.00E-01 | 3                  | 7.23E-01 | 3                  | 7.23E-01 | 1                  | 4.52E-01 | 1                  | 4.52E-01 |
| LRRC3    | 21  | 2                  | 6.73E-01 | 2                  | 6.73E-01 | 1                  | 4.52E-01 | 1                  | 4.52E-01 | 2                  | 6.44E-01 | 2                  | 6.44E-01 |
| ATXN1L   | 16  | 1                  | 8.08E-01 | 1                  | 8.08E-01 | 1                  | 1.00E+00 | 1                  | 1.00E+00 | 1                  | 4.52E-01 | 1                  | 4.52E-01 |
| EIF4E1B  | 5   | 2                  | 7.18E-01 | 2                  | 7.18E-01 | 2                  | 7.48E-01 | 2                  | 7.48E-01 | 1                  | 4.52E-01 | 1                  | 4.52E-01 |
| ABCA4    | 1   | 14                 | 5.69E-01 | 14                 | 5.69E-01 | 12                 | 6.58E-01 | 12                 | 6.58E-01 | 7                  | 4.52E-01 | 7                  | 4.52E-01 |
| LLGL2    | 17  | 2                  | 3.37E-01 | 2                  | 3.37E-01 | 1                  | 4.52E-01 | 1                  | 4.52E-01 | 1                  | 6.33E-01 | 1                  | 6.33E-01 |
| SDE2     | 1   | 2                  | 6.87E-01 | 2                  | 6.87E-01 | 2                  | 6.77E-01 | 2                  | 6.77E-01 | 1                  | 4.52E-01 | 1                  | 4.52E-01 |
| EVX2     | 2   | 1                  | 4.05E-01 | 1                  | 4.05E-01 | 1                  | 4.52E-01 | 1                  | 4.52E-01 |                    |          |                    |          |
| SCEL     | 13  | 4                  | 2.39E-01 | 4                  | 2.39E-01 | 3                  | 4.53E-01 | 3                  | 4.53E-01 | 1                  | 6.57E-01 | 1                  | 6.57E-01 |
| PCK2     | 14  | 8                  | 8.63E-01 | 8                  | 8.63E-01 | 8                  | 5.24E-01 | 8                  | 5.24E-01 | 3                  | 4.53E-01 | 3                  | 4.53E-01 |
| PVRL1    | 11  | 1                  | 7.50E-01 | 1                  | 7.50E-01 | 1                  | 1.00E+00 | 1                  | 1.00E+00 | 1                  | 4.53E-01 | 1                  | 4.53E-01 |
| SPATA13  | 13  | 1                  | 4.06E-01 | 1                  | 4.06E-01 | 1                  | 4.53E-01 | 1                  | 4.53E-01 |                    |          |                    |          |
| MRPL13   | 8   | 2                  | 7.04E-01 | 2                  | 7.04E-01 | 2                  | 7.54E-01 | 2                  | 7.54E-01 | 1                  | 4.53E-01 | 1                  | 4.53E-01 |
| KCTD8    | 4   | 1                  | 4.11E-01 | 1                  | 4.11E-01 | 1                  | 4.53E-01 | 1                  | 4.53E-01 |                    |          |                    |          |
| BAX      | 19  | 2                  | 6.07E-02 | 2                  | 6.07E-02 | 1                  | 4.65E-01 | 1                  | 4.65E-01 | 1                  | 4.53E-01 | 1                  | 4.53E-01 |
| KDM3A    | 2   | 1                  | 8.48E-01 | 1                  | 8.48E-01 | 1                  | 4.53E-01 | 1                  | 4.53E-01 | 1                  | 6.29E-01 | 1                  | 6.29E-01 |
| CXCL11   | 4   | 2                  | 5.35E-01 | 2                  | 5.35E-01 | 2                  | 4.53E-01 | 2                  | 4.53E-01 | 1                  | 6.41E-01 | 1                  | 6.41E-01 |
| FAM83E   | 19  | 2                  | 7.75E-01 | 2                  | 7.75E-01 | 2                  | 5.65E-01 | 2                  | 5.65E-01 | 1                  | 4.53E-01 | 1                  | 4.53E-01 |
| SBNO1    | 12  | 2                  | 3.26E-01 | 2                  | 3.26E-01 | 2                  | 6.05E-01 | 2                  | 6.05E-01 | 1                  | 4.53E-01 | 1                  | 4.53E-01 |
| OR5L1    | 11  |                    |          | 1                  | 4.87E-01 |                    |          | 1                  | 5.73E-01 |                    |          | 1                  | 4.53E-01 |



| SetID      | Chr | ADEH- vs NA        |          |                    |          | ADEH+ vs ADEH-     |          |                    |          | ADEH+ vs NA        |          |                    |          |
|------------|-----|--------------------|----------|--------------------|----------|--------------------|----------|--------------------|----------|--------------------|----------|--------------------|----------|
|            |     | rare novel         |          | all                |          | rare novel         |          | all                |          | rare novel         |          | all                |          |
|            |     | N variants in test | p-value  | N variants in test | p-value  | N variants in test | p-value  | N variants in test | p-value  | N variants in test | p-value  | N variants in test | p-value  |
| MYO1D      | 17  | 6                  | 7.65E-01 | 6                  | 7.65E-01 | 4                  | 4.53E-01 | 4                  | 4.53E-01 | 3                  | 4.96E-01 | 3                  | 4.96E-01 |
| KRT26      | 17  | 2                  | 6.99E-01 | 3                  | 7.03E-01 | 2                  | 7.30E-01 | 3                  | 5.35E-01 | 1                  | 4.53E-01 | 2                  | 5.64E-01 |
| CDKN2B     | 9   | 1                  | 1.81E-02 | 1                  | 1.81E-02 |                    |          |                    |          | 1                  | 4.53E-01 | 1                  | 4.53E-01 |
| MFI2       | 3   | 6                  | 2.77E-01 | 6                  | 2.77E-01 | 5                  | 5.52E-01 | 5                  | 5.52E-01 | 2                  | 4.53E-01 | 2                  | 4.53E-01 |
| ATMIN      | 16  | 1                  | 1.75E-02 | 1                  | 1.75E-02 |                    |          |                    |          | 1                  | 4.53E-01 | 1                  | 4.53E-01 |
| B4GALT3    | 1   | 1                  | 8.59E-01 | 1                  | 8.59E-01 | 1                  | 4.53E-01 | 1                  | 4.53E-01 | 1                  | 6.41E-01 | 1                  | 6.41E-01 |
| CA10       | 17  | 1                  | 7.49E-01 | 1                  | 7.49E-01 | 1                  | 4.53E-01 | 1                  | 4.53E-01 |                    |          |                    |          |
| FSD1       | 19  | 2                  | 4.56E-01 | 2                  | 4.56E-01 | 1                  | 4.53E-01 | 1                  | 4.53E-01 | 1                  | 6.18E-01 | 1                  | 6.18E-01 |
| BNC1       | 15  | 2                  | 4.95E-01 | 2                  | 4.95E-01 | 1                  | 4.53E-01 | 1                  | 4.53E-01 | 1                  | 6.03E-01 | 1                  | 6.03E-01 |
| TMEM165    | 4   | 2                  | 4.50E-01 | 2                  | 4.50E-01 | 1                  | 4.53E-01 | 1                  | 4.53E-01 | 1                  | 6.42E-01 | 1                  | 6.42E-01 |
| PIAS1      | 15  | 1                  | 7.49E-01 | 1                  | 7.49E-01 | 1                  | 4.53E-01 | 1                  | 4.53E-01 |                    |          |                    |          |
| LRIG2      | 1   | 2                  | 3.28E-01 | 2                  | 3.28E-01 | 2                  | 6.35E-01 | 2                  | 6.35E-01 | 1                  | 4.53E-01 | 1                  | 4.53E-01 |
| CAPN15     | 16  | 5                  | 8.47E-01 | 5                  | 8.47E-01 | 5                  | 4.54E-01 | 5                  | 4.54E-01 | 1                  | 4.53E-01 | 1                  | 4.53E-01 |
| KBTBD13    | 15  | 1                  | 4.12E-01 | 1                  | 4.12E-01 | 1                  | 4.53E-01 | 1                  | 4.53E-01 |                    |          |                    |          |
| MPHOSPH9   | 12  | 1                  | 7.41E-01 | 1                  | 7.41E-01 | 1                  | 4.53E-01 | 1                  | 4.53E-01 |                    |          |                    |          |
| CLEC4A     | 12  | 1                  | 7.41E-01 | 1                  | 7.41E-01 | 1                  | 4.53E-01 | 1                  | 4.53E-01 |                    |          |                    |          |
| CHRNA2     | 8   | 1                  | 7.41E-01 | 1                  | 7.41E-01 | 1                  | 4.53E-01 | 1                  | 4.53E-01 |                    |          |                    |          |
| RAPGEF6    | 5   | 1                  | 7.41E-01 | 1                  | 7.41E-01 | 1                  | 4.53E-01 | 1                  | 4.53E-01 |                    |          |                    |          |
| KIAA1328   | 18  | 1                  | 7.41E-01 | 1                  | 7.41E-01 | 1                  | 4.53E-01 | 1                  | 4.53E-01 |                    |          |                    |          |
| GJA5       | 1   | 1                  | 7.41E-01 | 1                  | 7.41E-01 | 1                  | 4.53E-01 | 1                  | 4.53E-01 |                    |          |                    |          |
| MCAM       | 11  | 1                  | 7.41E-01 | 1                  | 7.41E-01 | 1                  | 4.53E-01 | 1                  | 4.53E-01 |                    |          |                    |          |
| XRCC4      | 5   | 1                  | 7.41E-01 | 1                  | 7.41E-01 | 1                  | 4.53E-01 | 1                  | 4.53E-01 |                    |          |                    |          |
| ARHGAP33   | 19  | 3                  | 5.30E-02 | 3                  | 5.30E-02 | 2                  | 6.24E-01 | 2                  | 6.24E-01 | 1                  | 4.53E-01 | 1                  | 4.53E-01 |
| KIAA2026   | 9   | 9                  | 6.96E-01 | 9                  | 6.96E-01 | 7                  | 4.53E-01 | 7                  | 4.53E-01 | 3                  | 4.95E-01 | 3                  | 4.95E-01 |
| SLC18B1    | 6   | 1                  | 2.13E-01 | 1                  | 2.13E-01 | 1                  | 4.75E-01 | 1                  | 4.75E-01 | 1                  | 4.53E-01 | 1                  | 4.53E-01 |
| GABRG3     | 15  | 1                  | 7.46E-01 | 1                  | 7.46E-01 | 1                  | 4.53E-01 | 1                  | 4.53E-01 | 1                  | 6.58E-01 | 1                  | 6.58E-01 |
| C17orf89   | 17  | 1                  | 7.38E-01 | 1                  | 7.38E-01 | 1                  | 4.53E-01 | 1                  | 4.53E-01 |                    |          |                    |          |
| LTV1       | 6   | 3                  | 1.25E-01 | 3                  | 1.25E-01 | 1                  | 4.53E-01 | 1                  | 4.53E-01 | 2                  | 6.41E-01 | 2                  | 6.41E-01 |
| FPR2       | 19  | 1                  | 7.40E-01 | 1                  | 7.40E-01 | 1                  | 4.53E-01 | 1                  | 4.53E-01 |                    |          |                    |          |
| DENND1B    | 1   | 1                  | 7.40E-01 | 1                  | 7.40E-01 | 1                  | 4.53E-01 | 1                  | 4.53E-01 |                    |          |                    |          |
| IKBIP      | 12  | 2                  | 3.72E-01 | 2                  | 3.72E-01 | 1                  | 4.53E-01 | 1                  | 4.53E-01 | 1                  | 7.00E-01 | 1                  | 7.00E-01 |
| FAM107A    | 3   | 1                  | 7.40E-01 | 1                  | 7.40E-01 | 1                  | 4.53E-01 | 1                  | 4.53E-01 |                    |          |                    |          |
| TICRR      | 15  | 2                  | 2.97E-02 | 3                  | 2.97E-02 | 1                  | 4.53E-01 | 2                  | 4.53E-01 | 1                  | 4.53E-01 | 2                  | 4.54E-01 |
| PHF21A     | 11  | 1                  | 7.40E-01 | 1                  | 7.40E-01 | 1                  | 4.53E-01 | 1                  | 4.53E-01 |                    |          |                    |          |
| DBNL       | 7   | 2                  | 6.57E-01 | 2                  | 6.57E-01 | 2                  | 6.61E-01 | 2                  | 6.61E-01 | 1                  | 4.53E-01 | 1                  | 4.53E-01 |
| HES4       | 1   | 5                  | 4.15E-01 | 5                  | 4.15E-01 | 4                  | 6.08E-01 | 4                  | 6.08E-01 | 2                  | 4.53E-01 | 2                  | 4.53E-01 |
| LRP4       | 11  | 3                  | 5.27E-01 | 3                  | 5.27E-01 | 3                  | 4.53E-01 | 3                  | 4.53E-01 | 2                  | 5.62E-01 | 2                  | 5.62E-01 |
| ANGPTL4    | 19  | 4                  | 2.11E-01 | 4                  | 2.11E-01 | 3                  | 4.53E-01 | 3                  | 4.53E-01 | 3                  | 5.26E-01 | 3                  | 5.26E-01 |
| PRKCA      | 17  | 1                  | 4.11E-01 | 1                  | 4.11E-01 | 1                  | 4.53E-01 | 1                  | 4.53E-01 |                    |          |                    |          |
| ERVMER34-1 | 4   | 1                  | 2.28E-02 | 1                  | 2.28E-02 |                    |          |                    |          | 1                  | 4.53E-01 | 1                  | 4.53E-01 |
| HPD        | 12  | 1                  | 2.08E-01 | 1                  | 2.08E-01 | 1                  | 4.94E-01 | 1                  | 4.94E-01 | 1                  | 4.53E-01 | 1                  | 4.53E-01 |
| PPCS       | 1   | 1                  | 4.11E-01 | 1                  | 4.11E-01 | 1                  | 4.53E-01 | 1                  | 4.53E-01 |                    |          |                    |          |
| MECOM      | 3   | 3                  | 1.10E-01 | 3                  | 1.10E-01 | 1                  | 4.54E-01 | 1                  | 4.54E-01 | 2                  | 6.34E-01 | 2                  | 6.34E-01 |
| C8orf58    | 8   | 2                  | 7.10E-02 | 2                  | 7.10E-02 | 1                  | 4.54E-01 | 1                  | 4.54E-01 | 2                  | 4.58E-01 | 2                  | 4.58E-01 |
| TBC1D12    | 10  | 1                  | 7.01E-01 | 1                  | 7.01E-01 | 1                  | 4.54E-01 | 1                  | 4.54E-01 |                    |          |                    |          |
| CASP6      | 4   | 1                  | 7.01E-01 | 1                  | 7.01E-01 | 1                  | 4.54E-01 | 1                  | 4.54E-01 |                    |          |                    |          |
| RHOJ       | 14  | 2                  | 3.38E-01 | 2                  | 3.38E-01 | 1                  | 4.54E-01 | 1                  | 4.54E-01 | 1                  | 5.80E-01 | 1                  | 5.80E-01 |
| IQCF3      | 3   | 1                  | 7.01E-01 | 1                  | 7.01E-01 | 1                  | 4.54E-01 | 1                  | 4.54E-01 |                    |          |                    |          |

| SetID     | Chr | ADEH- vs NA        |          |                    |          | ADEH+ vs ADEH-     |          |                    |          | ADEH+ vs NA        |          |                    |          |
|-----------|-----|--------------------|----------|--------------------|----------|--------------------|----------|--------------------|----------|--------------------|----------|--------------------|----------|
|           |     | rare novel         |          | all                |          | rare novel         |          | all                |          | rare novel         |          | all                |          |
|           |     | N variants in test | p-value  | N variants in test | p-value  | N variants in test | p-value  | N variants in test | p-value  | N variants in test | p-value  | N variants in test | p-value  |
| TMEM212   | 3   | 1                  | 7.01E-01 | 1                  | 7.01E-01 | 1                  | 4.54E-01 | 1                  | 4.54E-01 |                    |          |                    |          |
| ZNF217    | 20  | 1                  | 4.11E-01 | 1                  | 4.11E-01 | 1                  | 4.54E-01 | 1                  | 4.54E-01 |                    |          |                    |          |
| PCDHA13   | 5   | 6                  | 1.00E+00 | 6                  | 1.00E+00 | 5                  | 4.54E-01 | 5                  | 4.54E-01 | 3                  | 5.57E-01 | 3                  | 5.57E-01 |
| OR52K1    | 11  | 2                  | 1.00E+00 | 2                  | 1.00E+00 | 2                  | 6.25E-01 | 2                  | 6.25E-01 | 1                  | 4.54E-01 | 1                  | 4.54E-01 |
| PRG4      | 1   | 8                  | 8.58E-01 | 9                  | 8.58E-01 | 6                  | 4.54E-01 | 7                  | 4.54E-01 | 4                  | 6.00E-01 | 5                  | 6.00E-01 |
| MN1       | 22  | 2                  | 7.28E-01 | 2                  | 7.28E-01 | 2                  | 7.60E-01 | 2                  | 7.60E-01 | 1                  | 4.54E-01 | 1                  | 4.54E-01 |
| TRIM21    | 11  | 1                  | 1.98E-01 | 1                  | 1.98E-01 | 1                  | 5.05E-01 | 1                  | 5.05E-01 | 1                  | 4.54E-01 | 1                  | 4.54E-01 |
| TREML4    | 6   | 1                  | 5.32E-01 | 1                  | 5.32E-01 | 1                  | 4.66E-01 | 1                  | 4.66E-01 | 1                  | 4.54E-01 | 1                  | 4.54E-01 |
| CFAP54    | 12  | 5                  | 1.00E+00 | 6                  | 1.00E+00 | 4                  | 5.37E-01 | 5                  | 4.54E-01 | 2                  | 6.50E-01 | 3                  | 5.76E-01 |
| DYNC1H1   | 14  | 2                  | 3.94E-01 | 2                  | 3.94E-01 | 1                  | 4.54E-01 | 1                  | 4.54E-01 | 1                  | 6.41E-01 | 1                  | 6.41E-01 |
| PVR       | 19  | 3                  | 7.78E-01 | 3                  | 7.78E-01 | 3                  | 5.84E-01 | 3                  | 5.84E-01 | 1                  | 4.54E-01 | 1                  | 4.54E-01 |
| SYCE1     | 10  | 2                  | 3.33E-01 | 2                  | 3.33E-01 | 1                  | 4.54E-01 | 1                  | 4.54E-01 | 1                  | 5.95E-01 | 1                  | 5.95E-01 |
| SAMD14    | 17  | 2                  | 4.34E-01 | 2                  | 4.34E-01 | 1                  | 4.54E-01 | 1                  | 4.54E-01 | 1                  | 6.29E-01 | 1                  | 6.29E-01 |
| DDX49     | 19  | 3                  | 4.88E-02 | 3                  | 4.88E-02 | 2                  | 6.29E-01 | 2                  | 6.29E-01 | 1                  | 4.54E-01 | 1                  | 4.54E-01 |
| OR56B1    | 11  | 1                  | 4.10E-01 | 2                  | 4.06E-01 | 1                  | 4.54E-01 | 2                  | 5.47E-01 |                    |          | 1                  | 1.00E+00 |
| DMXL2     | 15  | 1                  | 2.38E-01 | 1                  | 2.38E-01 | 1                  | 5.29E-01 | 1                  | 5.29E-01 | 1                  | 4.54E-01 | 1                  | 4.54E-01 |
| FLT1      | 13  | 2                  | 2.88E-02 | 2                  | 2.88E-02 | 1                  | 4.58E-01 | 1                  | 4.58E-01 | 1                  | 4.54E-01 | 1                  | 4.54E-01 |
| IBSP      | 4   | 2                  | 2.07E-01 | 2                  | 2.07E-01 | 1                  | 4.54E-01 | 1                  | 4.54E-01 | 2                  | 4.68E-01 | 2                  | 4.68E-01 |
| E2F8      | 11  | 3                  | 2.08E-01 | 3                  | 2.08E-01 | 1                  | 4.54E-01 | 1                  | 4.54E-01 | 2                  | 6.47E-01 | 2                  | 6.47E-01 |
| CCDC84    | 11  | 1                  | 3.98E-01 | 1                  | 3.98E-01 | 1                  | 4.54E-01 | 1                  | 4.54E-01 |                    |          |                    |          |
| RGPD2     | 2   |                    |          | 1                  | 2.87E-01 |                    |          | 1                  | 4.54E-01 |                    |          | 1                  | 1.00E+00 |
| COLEC12   | 18  | 2                  | 2.71E-01 | 3                  | 2.71E-01 | 2                  | 4.54E-01 | 3                  | 4.54E-01 | 1                  | 1.00E+00 | 2                  | 1.00E+00 |
| HACD4     | 9   | 2                  | 3.48E-01 | 2                  | 3.48E-01 | 2                  | 6.24E-01 | 2                  | 6.24E-01 | 1                  | 4.55E-01 | 1                  | 4.55E-01 |
| IGFBP7    | 4   | 1                  | 9.48E-01 | 1                  | 9.48E-01 | 1                  | 4.55E-01 | 1                  | 4.55E-01 | 1                  | 6.18E-01 | 1                  | 6.18E-01 |
| CEACAM8   | 19  | 2                  | 5.38E-01 | 2                  | 5.38E-01 | 2                  | 7.57E-01 | 2                  | 7.57E-01 | 2                  | 4.55E-01 | 2                  | 4.55E-01 |
| ADAMTS9   | 3   | 4                  | 2.71E-02 | 4                  | 2.71E-02 | 2                  | 6.22E-01 | 2                  | 6.22E-01 | 2                  | 4.55E-01 | 2                  | 4.55E-01 |
| RHBG      | 1   | 1                  | 1.95E-02 | 1                  | 1.95E-02 |                    |          |                    |          | 1                  | 4.55E-01 | 1                  | 4.55E-01 |
| RYR2      | 1   | 6                  | 8.57E-02 | 6                  | 8.57E-02 | 6                  | 4.55E-01 | 6                  | 4.55E-01 |                    |          |                    |          |
| C1orf87   | 1   | 2                  | 3.65E-01 | 3                  | 3.39E-01 | 1                  | 4.55E-01 | 2                  | 4.70E-01 | 1                  | 6.10E-01 | 2                  | 5.96E-01 |
| TFPI2     | 7   | 2                  | 4.10E-01 | 2                  | 4.10E-01 | 1                  | 4.55E-01 | 1                  | 4.55E-01 | 1                  | 6.80E-01 | 1                  | 6.80E-01 |
| KRTAP21-2 | 21  | 1                  | 9.68E-01 | 1                  | 9.68E-01 | 1                  | 4.55E-01 | 1                  | 4.55E-01 | 1                  | 6.10E-01 | 1                  | 6.10E-01 |
| IDH1      | 2   | 5                  | 7.14E-01 | 5                  | 7.14E-01 | 4                  | 1.00E+00 | 4                  | 1.00E+00 | 3                  | 4.55E-01 | 3                  | 4.55E-01 |
| UAP1L1    | 9   | 2                  | 3.48E-01 | 2                  | 3.48E-01 | 1                  | 4.55E-01 | 1                  | 4.55E-01 | 1                  | 6.55E-01 | 1                  | 6.55E-01 |
| MAGI3     | 1   | 2                  | 3.87E-01 | 2                  | 3.87E-01 | 1                  | 4.55E-01 | 1                  | 4.55E-01 | 1                  | 6.09E-01 | 1                  | 6.09E-01 |
| FBXO27    | 19  | 1                  | 7.46E-01 | 1                  | 7.46E-01 | 1                  | 4.55E-01 | 1                  | 4.55E-01 |                    |          |                    |          |
| RASA1     | 5   | 1                  | 6.81E-01 | 1                  | 6.81E-01 | 1                  | 4.55E-01 | 1                  | 4.55E-01 | 1                  | 6.03E-01 | 1                  | 6.03E-01 |
| ARHGAP25  | 2   | 1                  | 7.76E-01 | 1                  | 7.76E-01 | 1                  | 5.16E-01 | 1                  | 5.16E-01 | 1                  | 4.55E-01 | 1                  | 4.55E-01 |
| ZNF649    | 19  | 1                  | 7.54E-01 | 1                  | 7.54E-01 | 1                  | 4.55E-01 | 1                  | 4.55E-01 |                    |          |                    |          |
| C14orf79  | 14  | 2                  | 3.41E-01 | 2                  | 3.41E-01 | 1                  | 4.55E-01 | 1                  | 4.55E-01 | 2                  | 6.07E-01 | 2                  | 6.07E-01 |
| VANGL1    | 1   | 1                  | 7.03E-01 | 1                  | 7.03E-01 | 1                  | 4.55E-01 | 1                  | 4.55E-01 | 1                  | 6.33E-01 | 1                  | 6.33E-01 |
| GALNT6    | 12  | 4                  | 3.89E-02 | 4                  | 3.89E-02 | 1                  | 4.55E-01 | 1                  | 4.55E-01 | 3                  | 4.99E-01 | 3                  | 4.99E-01 |
| GPS1      | 17  | 1                  | 7.54E-01 | 1                  | 7.54E-01 | 1                  | 4.55E-01 | 1                  | 4.55E-01 |                    |          |                    |          |
| TMED4     | 7   | 1                  | 7.54E-01 | 1                  | 7.54E-01 | 1                  | 4.55E-01 | 1                  | 4.55E-01 |                    |          |                    |          |
| UPK2      | 11  | 2                  | 2.19E-01 | 2                  | 2.19E-01 | 2                  | 4.55E-01 | 2                  | 4.55E-01 |                    |          |                    |          |
| TTLL6     | 17  | 1                  | 7.53E-01 | 1                  | 7.53E-01 | 1                  | 4.55E-01 | 1                  | 4.55E-01 |                    |          |                    |          |
| OR2V2     | 5   | 3                  | 9.48E-02 | 3                  | 9.48E-02 | 1                  | 4.55E-01 | 1                  | 4.55E-01 | 2                  | 6.48E-01 | 2                  | 6.48E-01 |
| SLC9A9    | 3   | 2                  | 3.96E-01 | 2                  | 3.96E-01 | 1                  | 4.55E-01 | 1                  | 4.55E-01 | 1                  | 5.99E-01 | 1                  | 5.99E-01 |
| CLPSL1    | 6   | 1                  | 7.53E-01 | 1                  | 7.53E-01 | 1                  | 4.55E-01 | 1                  | 4.55E-01 |                    |          |                    |          |

| SetID    | Chr | ADEH- vs NA        |          |                    |          | ADEH+ vs ADEH-     |          |                    |          | ADEH+ vs NA        |          |                    |          |
|----------|-----|--------------------|----------|--------------------|----------|--------------------|----------|--------------------|----------|--------------------|----------|--------------------|----------|
|          |     | rarenovel          |          | all                |          | rarenovel          |          | all                |          | rarenovel          |          | all                |          |
|          |     | N variants in test | p-value  | N variants in test | p-value  | N variants in test | p-value  | N variants in test | p-value  | N variants in test | p-value  | N variants in test | p-value  |
| ESCO1    | 18  | 2                  | 6.77E-01 | 2                  | 6.77E-01 | 2                  | 7.29E-01 | 2                  | 7.29E-01 | 1                  | 4.55E-01 | 1                  | 4.55E-01 |
| CLCA1    | 1   | 4                  | 5.09E-01 | 4                  | 5.09E-01 | 3                  | 4.55E-01 | 3                  | 4.55E-01 | 2                  | 6.34E-01 | 2                  | 6.34E-01 |
| DAGLA    | 11  | 1                  | 7.45E-01 | 1                  | 7.45E-01 | 1                  | 4.55E-01 | 1                  | 4.55E-01 |                    |          |                    |          |
| PIK3CD   | 1   | 1                  | 7.45E-01 | 1                  | 7.45E-01 | 1                  | 4.55E-01 | 1                  | 4.55E-01 |                    |          |                    |          |
| PPFIA3   | 19  | 2                  | 3.61E-01 | 2                  | 3.61E-01 | 1                  | 4.55E-01 | 1                  | 4.55E-01 | 1                  | 6.30E-01 | 1                  | 6.30E-01 |
| KCNK10   | 14  | 3                  | 1.23E-01 | 3                  | 1.23E-01 | 1                  | 4.55E-01 | 1                  | 4.55E-01 | 2                  | 6.31E-01 | 2                  | 6.31E-01 |
| WDR70    | 5   | 3                  | 1.72E-01 | 3                  | 1.72E-01 | 1                  | 4.55E-01 | 1                  | 4.55E-01 | 2                  | 6.35E-01 | 2                  | 6.35E-01 |
| GGCX     | 2   | 2                  | 3.78E-01 | 2                  | 3.78E-01 | 1                  | 4.55E-01 | 1                  | 4.55E-01 | 1                  | 6.27E-01 | 1                  | 6.27E-01 |
| ASB1     | 2   | 1                  | 7.45E-01 | 1                  | 7.45E-01 | 1                  | 4.55E-01 | 1                  | 4.55E-01 |                    |          |                    |          |
| ZMYND12  | 1   | 1                  | 1.86E-02 | 1                  | 1.86E-02 |                    |          |                    |          | 1                  | 4.55E-01 | 1                  | 4.55E-01 |
| LRRC16A  | 6   | 2                  | 3.77E-01 | 2                  | 3.77E-01 | 1                  | 4.55E-01 | 1                  | 4.55E-01 | 1                  | 6.50E-01 | 1                  | 6.50E-01 |
| POLR1E   | 9   | 2                  | 5.02E-01 | 2                  | 5.02E-01 | 1                  | 4.55E-01 | 1                  | 4.55E-01 | 1                  | 6.65E-01 | 1                  | 6.65E-01 |
| OR1L8    | 9   | 1                  | 7.46E-01 | 1                  | 7.46E-01 | 1                  | 4.55E-01 | 1                  | 4.55E-01 |                    |          |                    |          |
| SNF8     | 17  | 1                  | 7.46E-01 | 1                  | 7.46E-01 | 1                  | 4.55E-01 | 1                  | 4.55E-01 |                    |          |                    |          |
| MSRA     | 8   | 2                  | 5.02E-01 | 2                  | 5.02E-01 | 1                  | 4.55E-01 | 1                  | 4.55E-01 | 1                  | 6.65E-01 | 1                  | 6.65E-01 |
| PI15     | 8   | 1                  | 7.46E-01 | 1                  | 7.46E-01 | 1                  | 4.55E-01 | 1                  | 4.55E-01 |                    |          |                    |          |
| OR56A1   | 11  | 2                  | 3.73E-01 | 2                  | 3.73E-01 | 1                  | 4.55E-01 | 1                  | 4.55E-01 | 1                  | 7.02E-01 | 1                  | 7.02E-01 |
| TLR3     | 4   | 2                  | 4.49E-01 | 3                  | 4.49E-01 | 1                  | 4.55E-01 | 2                  | 4.56E-01 | 1                  | 6.45E-01 | 2                  | 6.46E-01 |
| RAB37    | 17  | 1                  | 7.42E-01 | 1                  | 7.42E-01 | 1                  | 4.55E-01 | 1                  | 4.55E-01 |                    |          |                    |          |
| GAD1     | 2   | 1                  | 7.42E-01 | 1                  | 7.42E-01 | 1                  | 4.55E-01 | 1                  | 4.55E-01 |                    |          |                    |          |
| AHCYL1   | 1   | 1                  | 7.42E-01 | 1                  | 7.42E-01 | 1                  | 4.55E-01 | 1                  | 4.55E-01 |                    |          |                    |          |
| C20orf27 | 20  | 1                  | 7.42E-01 | 1                  | 7.42E-01 | 1                  | 4.55E-01 | 1                  | 4.55E-01 |                    |          |                    |          |
| PDCL2    | 4   | 1                  | 7.42E-01 | 1                  | 7.42E-01 | 1                  | 4.55E-01 | 1                  | 4.55E-01 |                    |          |                    |          |
| AKAP8    | 19  | 4                  | 3.31E-01 | 4                  | 3.31E-01 | 4                  | 4.55E-01 | 4                  | 4.55E-01 | 3                  | 6.49E-01 | 3                  | 6.49E-01 |
| CCDC63   | 12  | 2                  | 3.82E-01 | 2                  | 3.82E-01 | 1                  | 4.55E-01 | 1                  | 4.55E-01 | 1                  | 6.29E-01 | 1                  | 6.29E-01 |
| KRT82    | 12  | 8                  | 1.02E-01 | 8                  | 1.02E-01 | 8                  | 4.55E-01 | 8                  | 4.55E-01 | 4                  | 8.57E-01 | 4                  | 8.57E-01 |
| NUDT16L1 | 16  | 1                  | 8.27E-01 | 1                  | 8.27E-01 | 1                  | 4.56E-01 | 1                  | 4.56E-01 | 1                  | 6.28E-01 | 1                  | 6.28E-01 |
| OR8K5    | 11  | 2                  | 1.00E+00 | 3                  | 7.56E-01 | 2                  | 1.00E+00 | 3                  | 1.00E+00 | 1                  | 4.56E-01 | 2                  | 1.00E+00 |
| ASB2     | 14  | 2                  | 8.46E-03 | 2                  | 8.46E-03 |                    |          |                    |          | 2                  | 4.56E-01 | 2                  | 4.56E-01 |
| SRP68    | 17  | 2                  | 3.62E-01 | 2                  | 3.62E-01 | 2                  | 6.93E-01 | 2                  | 6.93E-01 | 1                  | 4.56E-01 | 1                  | 4.56E-01 |
| CD3G     | 11  | 1                  | 4.00E-01 | 1                  | 4.00E-01 | 1                  | 4.56E-01 | 1                  | 4.56E-01 |                    |          |                    |          |
| RBBP8    | 18  | 5                  | 9.15E-01 | 5                  | 9.15E-01 | 4                  | 4.56E-01 | 4                  | 4.56E-01 | 3                  | 5.18E-01 | 3                  | 5.18E-01 |
| KIAA1919 | 6   | 1                  | 1.59E-02 | 1                  | 1.59E-02 |                    |          |                    |          | 1                  | 4.56E-01 | 1                  | 4.56E-01 |
| NDUFS7   | 19  | 1                  | 7.46E-01 | 1                  | 7.46E-01 | 1                  | 4.56E-01 | 1                  | 4.56E-01 |                    |          |                    |          |
| HBM      | 16  | 1                  | 5.80E-01 | 1                  | 5.80E-01 | 1                  | 4.56E-01 | 1                  | 4.56E-01 | 1                  | 6.10E-01 | 1                  | 6.10E-01 |
| CRTAC1   | 10  | 4                  | 6.04E-01 | 4                  | 6.04E-01 | 3                  | 4.56E-01 | 3                  | 4.56E-01 | 2                  | 1.00E+00 | 2                  | 1.00E+00 |
| FAM109B  | 22  | 2                  | 3.12E-01 | 2                  | 3.12E-01 | 2                  | 4.56E-01 | 2                  | 4.56E-01 |                    |          |                    |          |
| HOXA3    | 7   | 1                  | 4.03E-01 | 1                  | 4.03E-01 | 1                  | 4.56E-01 | 1                  | 4.56E-01 |                    |          |                    |          |
| RGS9     | 17  | 5                  | 7.86E-01 | 5                  | 7.86E-01 | 3                  | 4.66E-01 | 3                  | 4.66E-01 | 3                  | 4.56E-01 | 3                  | 4.56E-01 |
| CTSL     | 9   | 1                  | 7.43E-01 | 1                  | 7.43E-01 | 1                  | 4.56E-01 | 1                  | 4.56E-01 |                    |          |                    |          |
| RMDN2    | 2   | 1                  | 7.43E-01 | 1                  | 7.43E-01 | 1                  | 4.56E-01 | 1                  | 4.56E-01 |                    |          |                    |          |
| CYFIP1   | 15  | 1                  | 7.43E-01 | 1                  | 7.43E-01 | 1                  | 4.56E-01 | 1                  | 4.56E-01 |                    |          |                    |          |
| ZFP30    | 19  | 1                  | 7.43E-01 | 1                  | 7.43E-01 | 1                  | 4.56E-01 | 1                  | 4.56E-01 |                    |          |                    |          |
| RNF126   | 19  | 1                  | 7.10E-01 | 1                  | 7.10E-01 | 1                  | 4.56E-01 | 1                  | 4.56E-01 | 1                  | 6.12E-01 | 1                  | 6.12E-01 |
| EIF3D    | 22  | 2                  | 4.44E-01 | 2                  | 4.44E-01 | 1                  | 4.56E-01 | 1                  | 4.56E-01 | 1                  | 5.81E-01 | 1                  | 5.81E-01 |
| CASQ1    | 1   | 1                  | 6.91E-01 | 1                  | 6.91E-01 | 1                  | 4.56E-01 | 1                  | 4.56E-01 | 1                  | 5.82E-01 | 1                  | 5.82E-01 |
| QRICH1   | 3   | 1                  | 7.43E-01 | 1                  | 7.43E-01 | 1                  | 4.56E-01 | 1                  | 4.56E-01 |                    |          |                    |          |
| CIITA    | 16  | 2                  | 3.76E-01 | 2                  | 3.76E-01 | 1                  | 4.56E-01 | 1                  | 4.56E-01 | 1                  | 6.41E-01 | 1                  | 6.41E-01 |

| SetID      | Chr | ADEH- vs NA        |          |                    |          | ADEH+ vs ADEH-     |          |                    |          | ADEH+ vs NA        |          |                    |          |
|------------|-----|--------------------|----------|--------------------|----------|--------------------|----------|--------------------|----------|--------------------|----------|--------------------|----------|
|            |     | rarenovel          |          | all                |          | rarenovel          |          | all                |          | rarenovel          |          | all                |          |
|            |     | N variants in test | p-value  | N variants in test | p-value  | N variants in test | p-value  | N variants in test | p-value  | N variants in test | p-value  | N variants in test | p-value  |
| RUNDC3B    | 7   | 1                  | 7.43E-01 | 1                  | 7.43E-01 | 1                  | 4.56E-01 | 1                  | 4.56E-01 |                    |          |                    |          |
| OVOL2      | 20  | 1                  | 7.37E-01 | 1                  | 7.37E-01 | 1                  | 4.56E-01 | 1                  | 4.56E-01 |                    |          |                    |          |
| LRRC63     | 13  | 1                  | 7.37E-01 | 1                  | 7.37E-01 | 1                  | 4.56E-01 | 1                  | 4.56E-01 |                    |          |                    |          |
| GPRC5D     | 12  | 1                  | 7.37E-01 | 1                  | 7.37E-01 | 1                  | 4.56E-01 | 1                  | 4.56E-01 |                    |          |                    |          |
| CAMK4      | 5   | 1                  | 7.37E-01 | 1                  | 7.37E-01 | 1                  | 4.56E-01 | 1                  | 4.56E-01 |                    |          |                    |          |
| FAM134C    | 17  | 2                  | 3.51E-01 | 2                  | 3.51E-01 | 1                  | 4.56E-01 | 1                  | 4.56E-01 | 1                  | 6.11E-01 | 1                  | 6.11E-01 |
| FTSJ3      | 17  | 2                  | 3.48E-01 | 2                  | 3.48E-01 | 1                  | 4.56E-01 | 1                  | 4.56E-01 | 1                  | 6.42E-01 | 1                  | 6.42E-01 |
| TBC1D13    | 9   | 1                  | 1.79E-01 | 1                  | 1.79E-01 | 1                  | 5.05E-01 | 1                  | 5.05E-01 | 1                  | 4.56E-01 | 1                  | 4.56E-01 |
| SLC5A10    | 17  | 2                  | 6.36E-01 | 2                  | 6.36E-01 | 1                  | 4.56E-01 | 1                  | 4.56E-01 | 2                  | 6.46E-01 | 2                  | 6.46E-01 |
| NPR3       | 5   | 1                  | 4.06E-01 | 1                  | 4.06E-01 | 1                  | 4.56E-01 | 1                  | 4.56E-01 |                    |          |                    |          |
| EXOSC3     | 9   | 3                  | 2.83E-01 | 3                  | 2.83E-01 | 2                  | 7.53E-01 | 2                  | 7.53E-01 | 2                  | 4.56E-01 | 2                  | 4.56E-01 |
| BOLL       | 2   | 3                  | 4.05E-01 | 3                  | 4.05E-01 | 3                  | 7.84E-01 | 3                  | 7.84E-01 | 1                  | 4.56E-01 | 1                  | 4.56E-01 |
| FAM92B     | 16  | 2                  | 1.00E+00 | 2                  | 1.00E+00 | 2                  | 1.00E+00 | 2                  | 1.00E+00 | 1                  | 4.56E-01 | 1                  | 4.56E-01 |
| IP6K2      | 3   | 2                  | 1.00E+00 | 2                  | 1.00E+00 | 2                  | 5.08E-01 | 2                  | 5.08E-01 | 1                  | 4.56E-01 | 1                  | 4.56E-01 |
| AP3M2      | 8   | 1                  | 4.05E-01 | 1                  | 4.05E-01 | 1                  | 4.56E-01 | 1                  | 4.56E-01 |                    |          |                    |          |
| MLH1       | 3   | 3                  | 4.52E-02 | 3                  | 4.52E-02 | 2                  | 6.23E-01 | 2                  | 6.23E-01 | 1                  | 4.56E-01 | 1                  | 4.56E-01 |
| FASTKD3    | 5   | 1                  | 4.07E-01 | 1                  | 4.07E-01 | 1                  | 4.56E-01 | 1                  | 4.56E-01 |                    |          |                    |          |
| FAM171A1   | 10  | 2                  | 2.21E-01 | 2                  | 2.21E-01 | 1                  | 4.56E-01 | 1                  | 4.56E-01 | 1                  | 6.85E-01 | 1                  | 6.85E-01 |
| DNAJC11    | 1   | 1                  | 2.28E-01 | 1                  | 2.28E-01 | 1                  | 4.57E-01 | 1                  | 4.57E-01 |                    |          |                    |          |
| TMOD1      | 9   | 1                  | 1.87E-02 | 1                  | 1.87E-02 |                    |          |                    |          | 1                  | 4.57E-01 | 1                  | 4.57E-01 |
| TBC1D24    | 16  | 3                  | 4.57E-01 | 3                  | 4.57E-01 | 3                  | 7.54E-01 | 3                  | 7.54E-01 | 1                  | 4.57E-01 | 1                  | 4.57E-01 |
| TEX9       | 15  | 2                  | 6.78E-01 | 2                  | 6.78E-01 | 1                  | 4.57E-01 | 1                  | 4.57E-01 | 2                  | 6.36E-01 | 2                  | 6.36E-01 |
| DEFB118    | 20  | 1                  | 8.98E-01 | 1                  | 8.98E-01 | 1                  | 4.57E-01 | 1                  | 4.57E-01 | 1                  | 5.79E-01 | 1                  | 5.79E-01 |
| PLOD3      | 7   | 2                  | 2.94E-02 | 2                  | 2.94E-02 | 1                  | 4.92E-01 | 1                  | 4.92E-01 | 1                  | 4.57E-01 | 1                  | 4.57E-01 |
| HSPH1      | 13  | 6                  | 6.47E-01 | 6                  | 6.47E-01 | 6                  | 4.72E-01 | 6                  | 4.72E-01 | 1                  | 4.57E-01 | 1                  | 4.57E-01 |
| COMMD3-BMI | 10  | 1                  | 5.04E-01 | 1                  | 5.04E-01 | 1                  | 4.71E-01 | 1                  | 4.71E-01 | 1                  | 4.57E-01 | 1                  | 4.57E-01 |
| COMMD3     | 10  | 3                  | 8.02E-01 | 3                  | 8.02E-01 | 3                  | 5.66E-01 | 3                  | 5.66E-01 | 1                  | 4.57E-01 | 1                  | 4.57E-01 |
| ZNF354C    | 5   | 3                  | 1.95E-02 | 3                  | 1.95E-02 | 1                  | 4.88E-01 | 1                  | 4.88E-01 | 2                  | 4.57E-01 | 2                  | 4.57E-01 |
| GRK4       | 4   | 5                  | 5.10E-01 | 5                  | 5.10E-01 | 5                  | 4.57E-01 | 5                  | 4.57E-01 | 3                  | 6.85E-01 | 3                  | 6.85E-01 |
| NUPL2      | 7   | 1                  | 1.65E-01 | 1                  | 1.65E-01 | 1                  | 4.57E-01 | 1                  | 4.57E-01 |                    |          |                    |          |
| TMPRSS11F  | 4   | 1                  | 5.01E-01 | 1                  | 5.01E-01 | 1                  | 4.57E-01 | 1                  | 4.57E-01 | 1                  | 4.58E-01 | 1                  | 4.58E-01 |
| GOLT1A     | 1   | 2                  | 3.58E-01 | 2                  | 3.58E-01 | 1                  | 4.57E-01 | 1                  | 4.57E-01 | 1                  | 6.06E-01 | 1                  | 6.06E-01 |
| PALD1      | 10  | 2                  | 3.89E-01 | 3                  | 3.86E-01 | 1                  | 4.57E-01 | 2                  | 5.11E-01 | 1                  | 6.98E-01 | 2                  | 7.17E-01 |
| PARP3      | 3   | 3                  | 7.10E-01 | 3                  | 7.10E-01 | 3                  | 5.14E-01 | 3                  | 5.14E-01 | 1                  | 4.57E-01 | 1                  | 4.57E-01 |
| ODC1       | 2   | 1                  | 1.95E-02 | 1                  | 1.95E-02 |                    |          |                    |          | 1                  | 4.57E-01 | 1                  | 4.57E-01 |
| LRIG1      | 3   | 6                  | 7.96E-01 | 6                  | 7.96E-01 | 5                  | 4.57E-01 | 5                  | 4.57E-01 | 2                  | 6.35E-01 | 2                  | 6.35E-01 |
| PRPF40B    | 12  | 4                  | 3.03E-02 | 4                  | 3.03E-02 | 2                  | 6.24E-01 | 2                  | 6.24E-01 | 2                  | 4.57E-01 | 2                  | 4.57E-01 |
| AOAH       | 7   | 1                  | 7.73E-01 | 1                  | 7.73E-01 | 1                  | 4.58E-01 | 1                  | 4.58E-01 | 1                  | 6.42E-01 | 1                  | 6.42E-01 |
| OR5211     | 11  | 2                  | 3.75E-02 | 3                  | 1.13E-01 | 1                  | 5.29E-01 | 2                  | 8.20E-01 | 1                  | 4.58E-01 | 2                  | 7.88E-01 |
| BUB1B-PAK6 | 15  | 2                  | 4.42E-01 | 2                  | 4.42E-01 | 1                  | 4.58E-01 | 1                  | 4.58E-01 | 1                  | 6.26E-01 | 1                  | 6.26E-01 |
| PAK6       | 15  | 2                  | 4.42E-01 | 2                  | 4.42E-01 | 1                  | 4.58E-01 | 1                  | 4.58E-01 | 1                  | 6.26E-01 | 1                  | 6.26E-01 |
| TRAF4      | 17  | 1                  | 7.51E-01 | 1                  | 7.51E-01 | 1                  | 4.58E-01 | 1                  | 4.58E-01 |                    |          |                    |          |
| FOXN1      | 17  | 1                  | 7.25E-01 | 1                  | 7.25E-01 | 1                  | 4.58E-01 | 1                  | 4.58E-01 | 1                  | 6.42E-01 | 1                  | 6.42E-01 |
| ZNF263     | 16  | 1                  | 7.51E-01 | 1                  | 7.51E-01 | 1                  | 4.58E-01 | 1                  | 4.58E-01 |                    |          |                    |          |
| TUFT1      | 1   | 1                  | 7.51E-01 | 1                  | 7.51E-01 | 1                  | 4.58E-01 | 1                  | 4.58E-01 |                    |          |                    |          |
| NYAP2      | 2   | 1                  | 7.51E-01 | 1                  | 7.51E-01 | 1                  | 4.58E-01 | 1                  | 4.58E-01 |                    |          |                    |          |
| RBM26      | 13  | 1                  | 7.51E-01 | 1                  | 7.51E-01 | 1                  | 4.58E-01 | 1                  | 4.58E-01 |                    |          |                    |          |
| SLC25A32   | 8   | 2                  | 7.66E-01 | 2                  | 7.66E-01 | 2                  | 6.31E-01 | 2                  | 6.31E-01 | 1                  | 4.58E-01 | 1                  | 4.58E-01 |

| SetID    | Chr | ADEH- vs NA        |          |                    |          | ADEH+ vs ADEH-     |          |                    |          | ADEH+ vs NA        |          |                    |          |
|----------|-----|--------------------|----------|--------------------|----------|--------------------|----------|--------------------|----------|--------------------|----------|--------------------|----------|
|          |     | rare novel         |          | all                |          | rare novel         |          | all                |          | rare novel         |          | all                |          |
|          |     | N variants in test | p-value  | N variants in test | p-value  | N variants in test | p-value  | N variants in test | p-value  | N variants in test | p-value  | N variants in test | p-value  |
| ZKSCAN5  | 7   | 2                  | 4.17E-01 | 2                  | 4.17E-01 | 1                  | 1.00E+00 | 1                  | 1.00E+00 | 2                  | 4.58E-01 | 2                  | 4.58E-01 |
| ICAM3    | 19  | 1                  | 7.45E-01 | 1                  | 7.45E-01 | 1                  | 4.58E-01 | 1                  | 4.58E-01 |                    |          |                    |          |
| HERC5    | 4   | 2                  | 2.84E-01 | 2                  | 2.84E-01 | 1                  | 4.58E-01 | 1                  | 4.58E-01 | 2                  | 6.39E-01 | 2                  | 6.39E-01 |
| BPIFA2   | 20  | 3                  | 1.77E-01 | 3                  | 1.77E-01 | 1                  | 4.58E-01 | 1                  | 4.58E-01 | 2                  | 6.30E-01 | 2                  | 6.30E-01 |
| SFRP4    | 7   | 1                  | 7.45E-01 | 1                  | 7.45E-01 | 1                  | 4.58E-01 | 1                  | 4.58E-01 |                    |          |                    |          |
| SLC13A4  | 7   | 1                  | 4.07E-01 | 1                  | 4.07E-01 | 1                  | 4.58E-01 | 1                  | 4.58E-01 |                    |          |                    |          |
| CYP24A1  | 20  | 3                  | 2.58E-01 | 3                  | 2.58E-01 | 2                  | 6.11E-01 | 2                  | 6.11E-01 | 2                  | 4.58E-01 | 2                  | 4.58E-01 |
| ZNF667   | 19  | 1                  | 8.62E-01 | 1                  | 8.62E-01 | 1                  | 4.58E-01 | 1                  | 4.58E-01 | 1                  | 6.31E-01 | 1                  | 6.31E-01 |
| MS4A18   | 11  | 1                  | 4.09E-01 | 1                  | 4.09E-01 | 1                  | 4.59E-01 | 1                  | 4.59E-01 |                    |          |                    |          |
| SERPING1 | 11  | 1                  | 9.00E-01 | 1                  | 9.00E-01 | 1                  | 4.59E-01 | 1                  | 4.59E-01 | 1                  | 6.11E-01 | 1                  | 6.11E-01 |
| BCKDHB   | 6   | 1                  | 7.45E-01 | 1                  | 7.45E-01 | 1                  | 4.59E-01 | 1                  | 4.59E-01 |                    |          |                    |          |
| TMEM155  | 4   | 1                  | 7.45E-01 | 1                  | 7.45E-01 | 1                  | 4.59E-01 | 1                  | 4.59E-01 |                    |          |                    |          |
| RHNO1    | 12  | 1                  | 6.60E-01 | 1                  | 6.60E-01 | 1                  | 4.59E-01 | 1                  | 4.59E-01 | 1                  | 6.60E-01 | 1                  | 6.60E-01 |
| ANHX     | 12  | 3                  | 1.48E-01 | 3                  | 1.48E-01 | 1                  | 4.59E-01 | 1                  | 4.59E-01 | 2                  | 6.31E-01 | 2                  | 6.31E-01 |
| CPSF6    | 12  | 1                  | 7.45E-01 | 1                  | 7.45E-01 | 1                  | 4.59E-01 | 1                  | 4.59E-01 |                    |          |                    |          |
| FOXJ2    | 12  | 1                  | 7.45E-01 | 1                  | 7.45E-01 | 1                  | 4.59E-01 | 1                  | 4.59E-01 |                    |          |                    |          |
| KLF3     | 4   | 1                  | 7.45E-01 | 1                  | 7.45E-01 | 1                  | 4.59E-01 | 1                  | 4.59E-01 |                    |          |                    |          |
| ICAM2    | 17  | 2                  | 4.60E-01 | 2                  | 4.60E-01 | 1                  | 4.59E-01 | 1                  | 4.59E-01 | 1                  | 6.58E-01 | 1                  | 6.58E-01 |
| MTFMT    | 15  | 1                  | 7.45E-01 | 1                  | 7.45E-01 | 1                  | 4.59E-01 | 1                  | 4.59E-01 |                    |          |                    |          |
| EXD3     | 9   | 11                 | 6.42E-01 | 11                 | 6.42E-01 | 10                 | 4.59E-01 | 10                 | 4.59E-01 | 8                  | 9.18E-01 | 8                  | 9.18E-01 |
| DDX24    | 14  | 2                  | 3.70E-02 | 2                  | 3.70E-02 | 1                  | 5.24E-01 | 1                  | 5.24E-01 | 1                  | 4.59E-01 | 1                  | 4.59E-01 |
| LRRC14B  | 5   | 2                  | 5.83E-01 | 2                  | 5.83E-01 | 2                  | 4.59E-01 | 2                  | 4.59E-01 | 1                  | 6.82E-01 | 1                  | 6.82E-01 |
| ZNF546   | 19  | 7                  | 3.72E-01 | 7                  | 3.72E-01 | 5                  | 1.00E+00 | 5                  | 1.00E+00 | 4                  | 4.59E-01 | 4                  | 4.59E-01 |
| SNX4     | 3   | 1                  | 7.46E-01 | 1                  | 7.46E-01 | 1                  | 4.59E-01 | 1                  | 4.59E-01 |                    |          |                    |          |
| BTNL8    | 5   | 1                  | 7.46E-01 | 1                  | 7.46E-01 | 1                  | 4.59E-01 | 1                  | 4.59E-01 |                    |          |                    |          |
| E2F7     | 12  | 2                  | 3.95E-01 | 2                  | 3.95E-01 | 1                  | 4.59E-01 | 1                  | 4.59E-01 | 1                  | 6.59E-01 | 1                  | 6.59E-01 |
| IMPAD1   | 8   | 1                  | 7.46E-01 | 1                  | 7.46E-01 | 1                  | 4.59E-01 | 1                  | 4.59E-01 |                    |          |                    |          |
| IFITM5   | 11  | 1                  | 7.46E-01 | 1                  | 7.46E-01 | 1                  | 4.59E-01 | 1                  | 4.59E-01 |                    |          |                    |          |
| ECM1     | 1   | 3                  | 1.00E+00 | 3                  | 1.00E+00 | 3                  | 4.59E-01 | 3                  | 4.59E-01 | 2                  | 5.54E-01 | 2                  | 5.54E-01 |
| TBC1D16  | 17  | 3                  | 5.24E-02 | 3                  | 5.24E-02 | 1                  | 4.86E-01 | 1                  | 4.86E-01 | 3                  | 4.59E-01 | 3                  | 4.59E-01 |
| CPS1     | 2   | 8                  | 7.43E-01 | 8                  | 7.43E-01 | 6                  | 4.59E-01 | 6                  | 4.59E-01 | 2                  | 6.04E-01 | 2                  | 6.04E-01 |
| PPP1R18  | 6   | 2                  | 3.27E-01 | 3                  | 8.87E-02 | 2                  | 6.41E-01 | 3                  | 4.59E-01 |                    |          | 1                  | 1.00E+00 |
| ZNF28    | 19  | 4                  | 3.54E-01 | 4                  | 3.54E-01 | 3                  | 6.57E-01 | 3                  | 6.57E-01 | 2                  | 4.59E-01 | 2                  | 4.59E-01 |
| COL21A1  | 6   | 6                  | 4.56E-01 | 6                  | 4.56E-01 | 5                  | 4.59E-01 | 5                  | 4.59E-01 | 1                  | 6.96E-01 | 1                  | 6.96E-01 |
| FAM129C  | 19  | 2                  | 6.33E-02 | 2                  | 6.33E-02 | 1                  | 4.74E-01 | 1                  | 4.74E-01 | 2                  | 4.59E-01 | 2                  | 4.59E-01 |
| RHBDL3   | 17  | 2                  | 3.88E-01 | 2                  | 3.88E-01 | 1                  | 4.59E-01 | 1                  | 4.59E-01 | 1                  | 5.77E-01 | 1                  | 5.77E-01 |
| LIFR     | 5   | 4                  | 7.35E-02 | 4                  | 7.35E-02 | 2                  | 6.75E-01 | 2                  | 6.75E-01 | 2                  | 4.59E-01 | 2                  | 4.59E-01 |
| SEC24D   | 4   | 5                  | 1.19E-01 | 5                  | 1.19E-01 | 5                  | 4.60E-01 | 5                  | 4.60E-01 |                    |          |                    |          |
| PTCRA    | 6   | 2                  | 2.32E-01 | 2                  | 2.32E-01 | 1                  | 4.60E-01 | 1                  | 4.60E-01 | 1                  | 6.64E-01 | 1                  | 6.64E-01 |
| NUP107   | 12  | 7                  | 1.15E-01 | 7                  | 1.15E-01 | 3                  | 7.84E-01 | 3                  | 7.84E-01 | 4                  | 4.60E-01 | 4                  | 4.60E-01 |
| FAM13A   | 4   | 2                  | 3.44E-01 | 2                  | 3.44E-01 | 1                  | 4.60E-01 | 1                  | 4.60E-01 | 1                  | 6.25E-01 | 1                  | 6.25E-01 |
| BGLAP    | 1   | 1                  | 7.41E-01 | 1                  | 7.41E-01 | 1                  | 4.60E-01 | 1                  | 4.60E-01 |                    |          |                    |          |
| LSM11    | 5   | 1                  | 7.41E-01 | 1                  | 7.41E-01 | 1                  | 4.60E-01 | 1                  | 4.60E-01 |                    |          |                    |          |
| MTOR     | 1   | 2                  | 3.75E-01 | 2                  | 3.75E-01 | 1                  | 4.60E-01 | 1                  | 4.60E-01 | 1                  | 6.64E-01 | 1                  | 6.64E-01 |
| NPY2R    | 4   | 1                  | 8.58E-01 | 1                  | 8.58E-01 | 1                  | 4.60E-01 | 1                  | 4.60E-01 | 1                  | 6.69E-01 | 1                  | 6.69E-01 |
| FOXA1    | 14  | 1                  | 8.50E-01 | 1                  | 8.50E-01 | 1                  | 4.60E-01 | 1                  | 4.60E-01 | 1                  | 6.58E-01 | 1                  | 6.58E-01 |
| MNDA     | 1   | 3                  | 2.44E-02 | 3                  | 2.44E-02 | 1                  | 5.01E-01 | 1                  | 5.01E-01 | 2                  | 4.60E-01 | 2                  | 4.60E-01 |
| ZNF106   | 15  | 2                  | 4.88E-01 | 2                  | 4.88E-01 | 1                  | 4.60E-01 | 1                  | 4.60E-01 | 1                  | 6.18E-01 | 1                  | 6.18E-01 |

| SetID    | Chr | ADEH- vs NA        |          |                    |          | ADEH+ vs ADEH-     |          |                    |          | ADEH+ vs NA        |          |                    |          |
|----------|-----|--------------------|----------|--------------------|----------|--------------------|----------|--------------------|----------|--------------------|----------|--------------------|----------|
|          |     | rarenovel          |          | all                |          | rarenovel          |          | all                |          | rarenovel          |          | all                |          |
|          |     | N variants in test | p-value  | N variants in test | p-value  | N variants in test | p-value  | N variants in test | p-value  | N variants in test | p-value  | N variants in test | p-value  |
| FBXO46   | 19  | 1                  | 7.41E-01 | 1                  | 7.41E-01 | 1                  | 4.60E-01 | 1                  | 4.60E-01 |                    |          |                    |          |
| LY86     | 6   | 1                  | 7.41E-01 | 1                  | 7.41E-01 | 1                  | 4.60E-01 | 1                  | 4.60E-01 |                    |          |                    |          |
| MED23    | 6   | 1                  | 7.41E-01 | 1                  | 7.41E-01 | 1                  | 4.60E-01 | 1                  | 4.60E-01 |                    |          |                    |          |
| RALB     | 2   | 1                  | 7.41E-01 | 1                  | 7.41E-01 | 1                  | 4.60E-01 | 1                  | 4.60E-01 |                    |          |                    |          |
| SGPP1    | 14  | 1                  | 7.41E-01 | 1                  | 7.41E-01 | 1                  | 4.60E-01 | 1                  | 4.60E-01 |                    |          |                    |          |
| TRAF3    | 14  | 1                  | 8.78E-01 | 1                  | 8.78E-01 | 1                  | 4.60E-01 | 1                  | 4.60E-01 | 1                  | 6.30E-01 | 1                  | 6.30E-01 |
| PGM2L1   | 11  | 1                  | 7.44E-01 | 1                  | 7.44E-01 | 1                  | 4.60E-01 | 1                  | 4.60E-01 |                    |          |                    |          |
| SLC9A1   | 1   | 1                  | 7.44E-01 | 1                  | 7.44E-01 | 1                  | 4.60E-01 | 1                  | 4.60E-01 |                    |          |                    |          |
| AMFR     | 16  | 2                  | 3.81E-01 | 2                  | 3.81E-01 | 1                  | 4.60E-01 | 1                  | 4.60E-01 | 1                  | 6.11E-01 | 1                  | 6.11E-01 |
| SDR42E1  | 16  | 1                  | 7.06E-01 | 2                  | 5.15E-01 | 1                  | 4.60E-01 | 2                  | 5.45E-01 | 1                  | 6.65E-01 | 2                  | 7.56E-01 |
| SEMA6D   | 15  | 5                  | 5.77E-01 | 5                  | 5.77E-01 | 4                  | 7.02E-01 | 4                  | 7.02E-01 | 2                  | 4.60E-01 | 2                  | 4.60E-01 |
| EFTUD2   | 17  | 2                  | 6.87E-01 | 2                  | 6.87E-01 | 2                  | 6.06E-01 | 2                  | 6.06E-01 | 1                  | 4.60E-01 | 1                  | 4.60E-01 |
| FOXS1    | 20  | 3                  | 9.69E-02 | 3                  | 9.69E-02 | 2                  | 5.01E-01 | 2                  | 5.01E-01 | 3                  | 4.60E-01 | 3                  | 4.60E-01 |
| CCM2L    | 20  | 2                  | 8.56E-01 | 2                  | 8.56E-01 | 2                  | 4.77E-01 | 2                  | 4.77E-01 | 1                  | 4.60E-01 | 1                  | 4.60E-01 |
| IQCB1    | 3   | 5                  | 4.20E-01 | 5                  | 4.20E-01 | 4                  | 1.00E+00 | 4                  | 1.00E+00 | 4                  | 4.60E-01 | 4                  | 4.60E-01 |
| ADAMTS1  | 21  | 4                  | 8.48E-01 | 4                  | 8.48E-01 | 3                  | 4.61E-01 | 3                  | 4.61E-01 | 2                  | 5.98E-01 | 2                  | 5.98E-01 |
| ID1      | 20  | 1                  | 8.81E-01 | 1                  | 8.81E-01 | 1                  | 4.61E-01 | 1                  | 4.61E-01 | 1                  | 6.46E-01 | 1                  | 6.46E-01 |
| HSPB8    | 12  | 1                  | 1.67E-02 | 1                  | 1.67E-02 |                    |          |                    |          | 1                  | 4.61E-01 | 1                  | 4.61E-01 |
| ATXN7L1  | 7   | 1                  | 4.10E-01 | 1                  | 4.10E-01 | 1                  | 4.61E-01 | 1                  | 4.61E-01 |                    |          |                    |          |
| TP73     | 1   | 5                  | 8.49E-02 | 5                  | 8.49E-02 | 5                  | 4.61E-01 | 5                  | 4.61E-01 |                    |          |                    |          |
| CDKL4    | 2   | 4                  | 1.26E-01 | 4                  | 1.26E-01 | 3                  | 4.61E-01 | 3                  | 4.61E-01 | 3                  | 1.00E+00 | 3                  | 1.00E+00 |
| UGT2B7   | 4   | 2                  | 5.08E-01 | 2                  | 5.08E-01 | 1                  | 1.00E+00 | 1                  | 1.00E+00 | 2                  | 4.61E-01 | 2                  | 4.61E-01 |
| LACE1    | 6   | 4                  | 7.67E-01 | 4                  | 7.67E-01 | 3                  | 4.61E-01 | 3                  | 4.61E-01 | 2                  | 6.29E-01 | 2                  | 6.29E-01 |
| KLHL28   | 14  | 1                  | 7.46E-01 | 1                  | 7.46E-01 | 1                  | 4.61E-01 | 1                  | 4.61E-01 |                    |          |                    |          |
| HTR3E    | 3   | 1                  | 7.46E-01 | 1                  | 7.46E-01 | 1                  | 4.61E-01 | 1                  | 4.61E-01 |                    |          |                    |          |
| ALMS1    | 2   | 1                  | 7.46E-01 | 1                  | 7.46E-01 | 1                  | 4.61E-01 | 1                  | 4.61E-01 |                    |          |                    |          |
| ACMSD    | 2   | 1                  | 7.46E-01 | 1                  | 7.46E-01 | 1                  | 4.61E-01 | 1                  | 4.61E-01 |                    |          |                    |          |
| DDIAS    | 11  | 1                  | 7.46E-01 | 1                  | 7.46E-01 | 1                  | 4.61E-01 | 1                  | 4.61E-01 |                    |          |                    |          |
| SERPINB8 | 18  | 1                  | 7.54E-01 | 2                  | 7.54E-01 | 1                  | 5.01E-01 | 2                  | 5.01E-01 |                    |          | 1                  | 4.61E-01 |
| OR52L1   | 11  | 2                  | 3.52E-01 | 4                  | 3.02E-01 | 1                  | 4.67E-01 | 3                  | 4.61E-01 | 1                  | 5.82E-01 | 3                  | 7.34E-01 |
| JAML     | 11  | 1                  | 8.88E-01 | 1                  | 8.88E-01 | 1                  | 4.61E-01 | 1                  | 4.61E-01 | 1                  | 6.18E-01 | 1                  | 6.18E-01 |
| RHAG     | 6   | 1                  | 7.51E-01 | 1                  | 7.51E-01 | 1                  | 4.61E-01 | 1                  | 4.61E-01 |                    |          |                    |          |
| TATDN3   | 1   | 1                  | 7.34E-01 | 1                  | 7.34E-01 | 1                  | 4.61E-01 | 1                  | 4.61E-01 | 1                  | 6.08E-01 | 1                  | 6.08E-01 |
| SALL4    | 20  | 1                  | 7.51E-01 | 1                  | 7.51E-01 | 1                  | 4.61E-01 | 1                  | 4.61E-01 |                    |          |                    |          |
| C16orf45 | 16  | 1                  | 7.51E-01 | 1                  | 7.51E-01 | 1                  | 4.61E-01 | 1                  | 4.61E-01 |                    |          |                    |          |
| GPR160   | 3   | 1                  | 7.51E-01 | 1                  | 7.51E-01 | 1                  | 4.61E-01 | 1                  | 4.61E-01 |                    |          |                    |          |
| ST8SIA5  | 18  | 1                  | 7.51E-01 | 1                  | 7.51E-01 | 1                  | 4.61E-01 | 1                  | 4.61E-01 |                    |          |                    |          |
| HUS1     | 7   | 1                  | 4.05E-01 | 1                  | 4.05E-01 | 1                  | 4.61E-01 | 1                  | 4.61E-01 |                    |          |                    |          |
| KRT71    | 12  | 2                  | 5.50E-01 | 2                  | 5.50E-01 | 2                  | 8.01E-01 | 2                  | 8.01E-01 | 1                  | 4.61E-01 | 1                  | 4.61E-01 |
| DTWD1    | 15  | 3                  | 1.74E-01 | 3                  | 1.74E-01 | 1                  | 4.62E-01 | 1                  | 4.62E-01 | 2                  | 6.34E-01 | 2                  | 6.34E-01 |
| FYB      | 5   | 3                  | 1.41E-01 | 3                  | 1.41E-01 | 1                  | 4.62E-01 | 1                  | 4.62E-01 | 2                  | 6.36E-01 | 2                  | 6.36E-01 |
| GPAT3    | 4   | 1                  | 6.87E-01 | 2                  | 4.56E-01 | 1                  | 4.62E-01 | 2                  | 1.00E+00 | 1                  | 6.63E-01 | 2                  | 1.00E+00 |
| CYP2W1   | 7   | 1                  | 7.48E-01 | 1                  | 7.48E-01 | 1                  | 4.62E-01 | 1                  | 4.62E-01 |                    |          |                    |          |
| RPRM     | 2   | 1                  | 7.48E-01 | 1                  | 7.48E-01 | 1                  | 4.62E-01 | 1                  | 4.62E-01 |                    |          |                    |          |
| EPHB6    | 7   | 1                  | 7.36E-01 | 1                  | 7.36E-01 | 1                  | 4.62E-01 | 1                  | 4.62E-01 |                    |          |                    |          |
| FXYD2    | 11  | 1                  | 7.36E-01 | 1                  | 7.36E-01 | 1                  | 4.62E-01 | 1                  | 4.62E-01 |                    |          |                    |          |
| SFXN3    | 10  | 1                  | 7.36E-01 | 1                  | 7.36E-01 | 1                  | 4.62E-01 | 1                  | 4.62E-01 |                    |          |                    |          |
| FAM171A2 | 17  | 3                  | 1.62E-01 | 4                  | 4.43E-01 | 1                  | 4.62E-01 | 2                  | 8.26E-01 | 2                  | 6.29E-01 | 3                  | 6.56E-01 |

| SetID     | Chr | ADEH- vs NA        |          |                    |          | ADEH+ vs ADEH-     |          |                    |          | ADEH+ vs NA        |          |                    |          |
|-----------|-----|--------------------|----------|--------------------|----------|--------------------|----------|--------------------|----------|--------------------|----------|--------------------|----------|
|           |     | rare novel         |          | all                |          | rare novel         |          | all                |          | rare novel         |          | all                |          |
|           |     | N variants in test | p-value  | N variants in test | p-value  | N variants in test | p-value  | N variants in test | p-value  | N variants in test | p-value  | N variants in test | p-value  |
| C9orf114  | 9   | 1                  | 7.36E-01 | 1                  | 7.36E-01 | 1                  | 4.62E-01 | 1                  | 4.62E-01 |                    |          |                    |          |
| CBY1      | 22  | 1                  | 6.81E-01 | 1                  | 6.81E-01 | 1                  | 4.62E-01 | 1                  | 4.62E-01 | 1                  | 6.12E-01 | 1                  | 6.12E-01 |
| OR8S1     | 12  | 1                  | 4.14E-01 | 1                  | 4.14E-01 | 1                  | 4.62E-01 | 1                  | 4.62E-01 |                    |          |                    |          |
| B4GAT1    | 11  | 1                  | 3.81E-01 | 1                  | 3.81E-01 | 1                  | 4.62E-01 | 1                  | 4.62E-01 |                    |          |                    |          |
| OR4K14    | 14  | 2                  | 3.40E-01 | 3                  | 1.24E-01 | 1                  | 4.62E-01 | 2                  | 4.99E-01 | 1                  | 6.28E-01 | 2                  | 8.74E-01 |
| TMEM173   | 5   | 1                  | 7.53E-01 | 2                  | 3.19E-01 | 1                  | 4.62E-01 | 2                  | 5.39E-01 |                    |          | 1                  | 5.76E-01 |
| LPAR3     | 1   | 2                  | 3.45E-01 | 2                  | 3.45E-01 | 1                  | 4.62E-01 | 1                  | 4.62E-01 | 1                  | 6.01E-01 | 1                  | 6.01E-01 |
| VPS37D    | 7   | 1                  | 7.53E-01 | 1                  | 7.53E-01 | 1                  | 4.62E-01 | 1                  | 4.62E-01 |                    |          |                    |          |
| INTS9     | 8   | 1                  | 7.53E-01 | 1                  | 7.53E-01 | 1                  | 4.62E-01 | 1                  | 4.62E-01 |                    |          |                    |          |
| OR1C1     | 1   | 1                  | 7.53E-01 | 1                  | 7.53E-01 | 1                  | 4.62E-01 | 1                  | 4.62E-01 |                    |          |                    |          |
| RERG      | 12  | 1                  | 7.53E-01 | 1                  | 7.53E-01 | 1                  | 4.62E-01 | 1                  | 4.62E-01 |                    |          |                    |          |
| PLA2G4C   | 19  | 3                  | 2.58E-01 | 3                  | 2.58E-01 | 1                  | 4.62E-01 | 1                  | 4.62E-01 | 2                  | 6.25E-01 | 2                  | 6.25E-01 |
| CD164L2   | 1   | 1                  | 4.04E-01 | 1                  | 4.04E-01 | 1                  | 4.62E-01 | 1                  | 4.62E-01 |                    |          |                    |          |
| RBP5      | 12  | 1                  | 7.35E-01 | 1                  | 7.35E-01 | 1                  | 4.62E-01 | 1                  | 4.62E-01 |                    |          |                    |          |
| FKBPL     | 6   | 1                  | 7.35E-01 | 1                  | 7.35E-01 | 1                  | 4.62E-01 | 1                  | 4.62E-01 |                    |          |                    |          |
| OOSP2     | 11  | 1                  | 7.35E-01 | 1                  | 7.35E-01 | 1                  | 4.62E-01 | 1                  | 4.62E-01 |                    |          |                    |          |
| PHTF2     | 7   | 2                  | 4.89E-01 | 2                  | 4.89E-01 | 1                  | 4.62E-01 | 1                  | 4.62E-01 | 1                  | 6.13E-01 | 1                  | 6.13E-01 |
| ELP4      | 11  | 3                  | 8.62E-02 | 3                  | 8.62E-02 | 1                  | 4.62E-01 | 1                  | 4.62E-01 | 3                  | 5.02E-01 | 3                  | 5.02E-01 |
| GNL1      | 6   | 3                  | 9.11E-02 | 3                  | 9.11E-02 | 1                  | 4.62E-01 | 1                  | 4.62E-01 | 3                  | 4.86E-01 | 3                  | 4.86E-01 |
| CEPT1     | 1   | 1                  | 7.35E-01 | 1                  | 7.35E-01 | 1                  | 4.62E-01 | 1                  | 4.62E-01 |                    |          |                    |          |
| RAP1GAP2  | 17  | 1                  | 7.35E-01 | 1                  | 7.35E-01 | 1                  | 4.62E-01 | 1                  | 4.62E-01 |                    |          |                    |          |
| ENC1      | 5   | 2                  | 4.66E-01 | 2                  | 4.66E-01 | 1                  | 4.62E-01 | 1                  | 4.62E-01 | 1                  | 6.50E-01 | 1                  | 6.50E-01 |
| EXOSC1    | 10  | 2                  | 3.93E-01 | 2                  | 3.93E-01 | 1                  | 4.62E-01 | 1                  | 4.62E-01 | 1                  | 6.33E-01 | 1                  | 6.33E-01 |
| C3orf35   | 3   | 1                  | 7.35E-01 | 1                  | 7.35E-01 | 1                  | 4.62E-01 | 1                  | 4.62E-01 |                    |          |                    |          |
| ABCG1     | 21  | 1                  | 4.06E-01 | 1                  | 4.06E-01 | 1                  | 4.62E-01 | 1                  | 4.62E-01 |                    |          |                    |          |
| EPS8L3    | 1   | 3                  | 2.11E-01 | 3                  | 2.11E-01 | 1                  | 4.62E-01 | 1                  | 4.62E-01 | 2                  | 6.35E-01 | 2                  | 6.35E-01 |
| HGF       | 7   | 6                  | 1.25E-01 | 6                  | 1.25E-01 | 6                  | 4.62E-01 | 6                  | 4.62E-01 |                    |          |                    |          |
| PGM5      | 9   | 1                  | 4.09E-01 | 1                  | 4.09E-01 | 1                  | 4.62E-01 | 1                  | 4.62E-01 |                    |          |                    |          |
| PIGT      | 20  | 5                  | 6.13E-01 | 5                  | 6.13E-01 | 6                  | 5.50E-01 | 6                  | 5.50E-01 | 3                  | 4.62E-01 | 3                  | 4.62E-01 |
| RDH13     | 19  | 1                  | 7.45E-01 | 1                  | 7.45E-01 | 1                  | 4.62E-01 | 1                  | 4.62E-01 |                    |          |                    |          |
| OR10Q1    | 11  | 1                  | 7.43E-01 | 1                  | 7.43E-01 | 1                  | 4.62E-01 | 1                  | 4.62E-01 |                    |          |                    |          |
| B3GALNT2  | 1   | 2                  | 3.67E-01 | 2                  | 3.67E-01 | 1                  | 4.62E-01 | 1                  | 4.62E-01 | 1                  | 6.10E-01 | 1                  | 6.10E-01 |
| KIF3A     | 5   | 1                  | 7.43E-01 | 1                  | 7.43E-01 | 1                  | 4.62E-01 | 1                  | 4.62E-01 |                    |          |                    |          |
| ZNF606    | 19  | 1                  | 7.43E-01 | 1                  | 7.43E-01 | 1                  | 4.62E-01 | 1                  | 4.62E-01 |                    |          |                    |          |
| LRBA      | 4   | 15                 | 1.31E-01 | 15                 | 1.31E-01 | 8                  | 4.62E-01 | 8                  | 4.62E-01 | 11                 | 8.67E-01 | 11                 | 8.67E-01 |
| VPS37A    | 8   | 2                  | 7.14E-02 | 2                  | 7.14E-02 | 1                  | 5.39E-01 | 1                  | 5.39E-01 | 2                  | 4.62E-01 | 2                  | 4.62E-01 |
| BOP1      | 8   | 1                  | 4.04E-01 | 1                  | 4.04E-01 | 1                  | 4.62E-01 | 1                  | 4.62E-01 |                    |          |                    |          |
| CRTC1     | 19  | 3                  | 2.23E-02 | 3                  | 2.23E-02 | 1                  | 5.29E-01 | 1                  | 5.29E-01 | 2                  | 4.62E-01 | 2                  | 4.62E-01 |
| EXOSC2    | 9   | 1                  | 7.44E-01 | 1                  | 7.44E-01 | 1                  | 4.62E-01 | 1                  | 4.62E-01 |                    |          |                    |          |
| AASDHPT   | 11  | 1                  | 7.44E-01 | 1                  | 7.44E-01 | 1                  | 4.62E-01 | 1                  | 4.62E-01 |                    |          |                    |          |
| TMEM53    | 1   | 2                  | 2.52E-01 | 2                  | 2.52E-01 | 2                  | 6.31E-01 | 2                  | 6.31E-01 | 2                  | 4.62E-01 | 2                  | 4.62E-01 |
| OPTN      | 10  | 1                  | 7.41E-01 | 1                  | 7.41E-01 | 1                  | 4.62E-01 | 1                  | 4.62E-01 |                    |          |                    |          |
| SUSD3     | 9   | 2                  | 3.98E-01 | 2                  | 3.98E-01 | 1                  | 4.62E-01 | 1                  | 4.62E-01 | 1                  | 6.53E-01 | 1                  | 6.53E-01 |
| MYO1B     | 2   | 2                  | 4.96E-01 | 2                  | 4.96E-01 | 1                  | 4.62E-01 | 1                  | 4.62E-01 | 1                  | 6.31E-01 | 1                  | 6.31E-01 |
| PARP8     | 5   | 2                  | 4.61E-01 | 2                  | 4.61E-01 | 1                  | 4.62E-01 | 1                  | 4.62E-01 | 1                  | 6.33E-01 | 1                  | 6.33E-01 |
| APOBEC3C  | 22  | 1                  | 7.41E-01 | 1                  | 7.41E-01 | 1                  | 4.62E-01 | 1                  | 4.62E-01 |                    |          |                    |          |
| SMG7      | 1   | 5                  | 6.90E-01 | 5                  | 6.90E-01 | 4                  | 7.94E-01 | 4                  | 7.94E-01 | 2                  | 4.62E-01 | 2                  | 4.62E-01 |
| RAB11FIP3 | 16  | 1                  | 7.50E-01 | 1                  | 7.50E-01 | 1                  | 4.62E-01 | 1                  | 4.62E-01 |                    |          |                    |          |

| SetID        | Chr | ADEH- vs NA        |          |                    |          | ADEH+ vs ADEH-     |          |                    |          | ADEH+ vs NA        |          |                    |          |
|--------------|-----|--------------------|----------|--------------------|----------|--------------------|----------|--------------------|----------|--------------------|----------|--------------------|----------|
|              |     | rare novel         |          | all                |          | rare novel         |          | all                |          | rare novel         |          | all                |          |
|              |     | N variants in test | p-value  | N variants in test | p-value  | N variants in test | p-value  | N variants in test | p-value  | N variants in test | p-value  | N variants in test | p-value  |
| TUBGCP2      | 10  | 2                  | 3.48E-01 | 2                  | 3.48E-01 | 1                  | 4.62E-01 | 1                  | 4.62E-01 | 1                  | 6.28E-01 | 1                  | 6.28E-01 |
| C1orf68      | 1   | 1                  | 7.50E-01 | 1                  | 7.50E-01 | 1                  | 4.62E-01 | 1                  | 4.62E-01 |                    |          |                    |          |
| SSH1         | 12  | 2                  | 6.28E-02 | 2                  | 6.28E-02 | 1                  | 4.62E-01 | 1                  | 4.62E-01 | 2                  | 4.78E-01 | 2                  | 4.78E-01 |
| DDI1         | 11  | 2                  | 2.67E-01 | 2                  | 2.67E-01 | 1                  | 4.62E-01 | 1                  | 4.62E-01 | 2                  | 6.60E-01 | 2                  | 6.60E-01 |
| SLC7A5       | 16  | 1                  | 7.50E-01 | 1                  | 7.50E-01 | 1                  | 4.62E-01 | 1                  | 4.62E-01 |                    |          |                    |          |
| OR5M11       | 11  | 1                  | 8.91E-01 | 2                  | 8.35E-01 | 1                  | 4.62E-01 | 2                  | 1.00E+00 | 1                  | 6.82E-01 | 2                  | 8.71E-01 |
| ALDH6A1      | 14  | 1                  | 4.05E-01 | 1                  | 4.05E-01 | 1                  | 4.62E-01 | 1                  | 4.62E-01 |                    |          |                    |          |
| TTYH2        | 17  | 6                  | 8.53E-01 | 6                  | 8.53E-01 | 5                  | 4.63E-01 | 5                  | 4.63E-01 | 2                  | 6.31E-01 | 2                  | 6.31E-01 |
| NEUROD4      | 12  | 1                  | 6.80E-01 | 1                  | 6.80E-01 | 1                  | 4.63E-01 | 1                  | 4.63E-01 | 1                  | 6.58E-01 | 1                  | 6.58E-01 |
| CPTP         | 1   | 1                  | 7.44E-01 | 1                  | 7.44E-01 | 1                  | 4.63E-01 | 1                  | 4.63E-01 |                    |          |                    |          |
| TDRD10       | 1   | 1                  | 7.44E-01 | 1                  | 7.44E-01 | 1                  | 4.63E-01 | 1                  | 4.63E-01 |                    |          |                    |          |
| KRTAP24-1    | 21  | 1                  | 7.44E-01 | 1                  | 7.44E-01 | 1                  | 4.63E-01 | 1                  | 4.63E-01 |                    |          |                    |          |
| WDR62        | 19  | 3                  | 7.23E-01 | 3                  | 7.23E-01 | 2                  | 4.87E-01 | 2                  | 4.87E-01 | 2                  | 4.63E-01 | 2                  | 4.63E-01 |
| DPH2         | 1   | 3                  | 2.45E-01 | 3                  | 2.45E-01 | 1                  | 4.63E-01 | 1                  | 4.63E-01 | 3                  | 5.09E-01 | 3                  | 5.09E-01 |
| NOCT         | 4   | 3                  | 8.25E-01 | 3                  | 8.25E-01 | 3                  | 4.63E-01 | 3                  | 4.63E-01 | 2                  | 6.50E-01 | 2                  | 6.50E-01 |
| ITSN2        | 2   | 7                  | 7.53E-01 | 7                  | 7.53E-01 | 6                  | 4.63E-01 | 6                  | 4.63E-01 | 5                  | 4.91E-01 | 5                  | 4.91E-01 |
| SYNGAP1      | 6   | 1                  | 7.48E-01 | 1                  | 7.48E-01 | 1                  | 4.63E-01 | 1                  | 4.63E-01 |                    |          |                    |          |
| IMMT         | 2   | 1                  | 7.48E-01 | 1                  | 7.48E-01 | 1                  | 4.63E-01 | 1                  | 4.63E-01 |                    |          |                    |          |
| RPUSD3       | 3   | 2                  | 4.02E-01 | 2                  | 4.02E-01 | 1                  | 4.63E-01 | 1                  | 4.63E-01 | 1                  | 6.25E-01 | 1                  | 6.25E-01 |
| MTF1         | 1   | 1                  | 7.48E-01 | 1                  | 7.48E-01 | 1                  | 4.63E-01 | 1                  | 4.63E-01 |                    |          |                    |          |
| MRPS24       | 7   | 1                  | 7.48E-01 | 1                  | 7.48E-01 | 1                  | 4.63E-01 | 1                  | 4.63E-01 |                    |          |                    |          |
| F13A1        | 6   | 1                  | 7.48E-01 | 1                  | 7.48E-01 | 1                  | 4.63E-01 | 1                  | 4.63E-01 |                    |          |                    |          |
| FAM3C        | 7   | 1                  | 7.48E-01 | 1                  | 7.48E-01 | 1                  | 4.63E-01 | 1                  | 4.63E-01 |                    |          |                    |          |
| PTGES3L      | 17  | 1                  | 7.48E-01 | 1                  | 7.48E-01 | 1                  | 4.63E-01 | 1                  | 4.63E-01 |                    |          |                    |          |
| PTGES3L-AARS | 17  | 1                  | 7.48E-01 | 1                  | 7.48E-01 | 1                  | 4.63E-01 | 1                  | 4.63E-01 |                    |          |                    |          |
| TRNAU1AP     | 1   | 1                  | 6.66E-01 | 1                  | 6.66E-01 | 1                  | 4.63E-01 | 1                  | 4.63E-01 | 1                  | 6.60E-01 | 1                  | 6.60E-01 |
| URGCP-MRPS2  | 7   | 1                  | 7.48E-01 | 1                  | 7.48E-01 | 1                  | 4.63E-01 | 1                  | 4.63E-01 |                    |          |                    |          |
| LRRC2        | 3   | 2                  | 7.18E-03 | 2                  | 7.18E-03 |                    |          |                    |          | 2                  | 4.63E-01 | 2                  | 4.63E-01 |
| FAM222A      | 12  | 1                  | 7.53E-01 | 1                  | 7.53E-01 | 1                  | 4.63E-01 | 1                  | 4.63E-01 |                    |          |                    |          |
| SLC44A4      | 6   | 1                  | 7.53E-01 | 1                  | 7.53E-01 | 1                  | 4.63E-01 | 1                  | 4.63E-01 |                    |          |                    |          |
| CCT3         | 1   | 2                  | 4.26E-01 | 2                  | 4.26E-01 | 1                  | 4.63E-01 | 1                  | 4.63E-01 | 1                  | 6.71E-01 | 1                  | 6.71E-01 |
| PEX14        | 1   | 2                  | 4.30E-01 | 2                  | 4.30E-01 | 1                  | 4.63E-01 | 1                  | 4.63E-01 | 1                  | 6.51E-01 | 1                  | 6.51E-01 |
| RARG         | 12  | 2                  | 3.72E-01 | 2                  | 3.72E-01 | 1                  | 4.63E-01 | 1                  | 4.63E-01 | 1                  | 6.37E-01 | 1                  | 6.37E-01 |
| CCDC96       | 4   | 1                  | 7.53E-01 | 1                  | 7.53E-01 | 1                  | 4.63E-01 | 1                  | 4.63E-01 |                    |          |                    |          |
| HDAC1        | 1   | 1                  | 7.53E-01 | 1                  | 7.53E-01 | 1                  | 4.63E-01 | 1                  | 4.63E-01 |                    |          |                    |          |
| RSPH6A       | 19  | 1                  | 7.44E-01 | 1                  | 7.44E-01 | 1                  | 4.63E-01 | 1                  | 4.63E-01 |                    |          |                    |          |
| SRFBP1       | 5   | 1                  | 7.44E-01 | 1                  | 7.44E-01 | 1                  | 4.63E-01 | 1                  | 4.63E-01 |                    |          |                    |          |
| FPR3         | 19  | 1                  | 7.13E-01 | 1                  | 7.13E-01 | 1                  | 4.63E-01 | 1                  | 4.63E-01 | 1                  | 5.17E-01 | 1                  | 5.17E-01 |
| CLNK         | 4   | 1                  | 7.44E-01 | 2                  | 1.00E+00 | 1                  | 4.63E-01 | 2                  | 8.56E-01 |                    |          | 1                  | 7.26E-01 |
| RPLP2        | 11  | 1                  | 6.89E-01 | 1                  | 6.89E-01 | 1                  | 4.63E-01 | 1                  | 4.63E-01 | 1                  | 6.16E-01 | 1                  | 6.16E-01 |
| SETD7        | 4   | 2                  | 4.25E-01 | 2                  | 4.25E-01 | 1                  | 4.63E-01 | 1                  | 4.63E-01 | 1                  | 6.75E-01 | 1                  | 6.75E-01 |
| ALG9         | 11  | 2                  | 4.01E-01 | 2                  | 4.01E-01 | 1                  | 4.63E-01 | 1                  | 4.63E-01 | 1                  | 6.34E-01 | 1                  | 6.34E-01 |
| CRADD        | 12  | 1                  | 7.44E-01 | 1                  | 7.44E-01 | 1                  | 4.63E-01 | 1                  | 4.63E-01 |                    |          |                    |          |
| LDLRAP1      | 1   |                    |          | 1                  | 1.61E-02 |                    |          | 1                  | 4.63E-01 |                    |          | 1                  | 6.43E-01 |
| SAA2-SAA4    | 11  | 1                  | 9.63E-01 | 1                  | 9.63E-01 | 1                  | 4.63E-01 | 1                  | 4.63E-01 | 1                  | 6.11E-01 | 1                  | 6.11E-01 |
| SAA4         | 11  | 1                  | 9.63E-01 | 1                  | 9.63E-01 | 1                  | 4.63E-01 | 1                  | 4.63E-01 | 1                  | 6.11E-01 | 1                  | 6.11E-01 |
| CCDC91       | 12  | 2                  | 3.54E-01 | 2                  | 3.54E-01 | 1                  | 4.63E-01 | 1                  | 4.63E-01 | 1                  | 5.33E-01 | 1                  | 5.33E-01 |
| LARP4        | 12  | 2                  | 3.69E-01 | 2                  | 3.69E-01 | 1                  | 4.63E-01 | 1                  | 4.63E-01 | 1                  | 6.28E-01 | 1                  | 6.28E-01 |



| SetID    | Chr | ADEH- vs NA        |          |                    |          | ADEH+ vs ADEH-     |          |                    |          | ADEH+ vs NA        |          |                    |          |
|----------|-----|--------------------|----------|--------------------|----------|--------------------|----------|--------------------|----------|--------------------|----------|--------------------|----------|
|          |     | rare novel         |          | all                |          | rare novel         |          | all                |          | rare novel         |          | all                |          |
|          |     | N variants in test | p-value  | N variants in test | p-value  | N variants in test | p-value  | N variants in test | p-value  | N variants in test | p-value  | N variants in test | p-value  |
| NKD1     | 16  | 1                  | 7.50E-01 | 1                  | 7.50E-01 | 1                  | 4.63E-01 | 1                  | 4.63E-01 |                    |          |                    |          |
| ADGRA3   | 4   | 2                  | 2.64E-01 | 2                  | 2.64E-01 | 1                  | 4.63E-01 | 1                  | 4.63E-01 | 2                  | 6.41E-01 | 2                  | 6.41E-01 |
| KIF3B    | 20  | 1                  | 7.50E-01 | 1                  | 7.50E-01 | 1                  | 4.63E-01 | 1                  | 4.63E-01 |                    |          |                    |          |
| SLC16A14 | 2   | 1                  | 7.50E-01 | 1                  | 7.50E-01 | 1                  | 4.63E-01 | 1                  | 4.63E-01 |                    |          |                    |          |
| PPP6R2   | 22  | 3                  | 7.32E-01 | 3                  | 7.32E-01 | 2                  | 5.54E-01 | 2                  | 5.54E-01 | 2                  | 4.63E-01 | 2                  | 4.63E-01 |
| ENG      | 9   | 1                  | 3.86E-01 | 1                  | 3.86E-01 | 1                  | 4.63E-01 | 1                  | 4.63E-01 |                    |          |                    |          |
| OR7A10   | 19  | 2                  | 3.42E-01 | 2                  | 3.42E-01 | 1                  | 4.63E-01 | 1                  | 4.63E-01 | 1                  | 5.82E-01 | 1                  | 5.82E-01 |
| TMED6    | 16  | 1                  | 3.89E-01 | 1                  | 3.89E-01 | 1                  | 4.63E-01 | 1                  | 4.63E-01 |                    |          |                    |          |
| NPAS3    | 14  | 1                  | 7.37E-01 | 1                  | 7.37E-01 | 1                  | 4.63E-01 | 1                  | 4.63E-01 |                    |          |                    |          |
| MTMR9    | 8   | 1                  | 7.37E-01 | 1                  | 7.37E-01 | 1                  | 4.63E-01 | 1                  | 4.63E-01 |                    |          |                    |          |
| FAM120B  | 6   | 1                  | 7.37E-01 | 1                  | 7.37E-01 | 1                  | 4.63E-01 | 1                  | 4.63E-01 |                    |          |                    |          |
| FLOT1    | 6   | 1                  | 7.37E-01 | 1                  | 7.37E-01 | 1                  | 4.63E-01 | 1                  | 4.63E-01 |                    |          |                    |          |
| DEFB112  | 6   | 1                  | 4.10E-01 | 1                  | 4.10E-01 | 1                  | 4.63E-01 | 1                  | 4.63E-01 |                    |          |                    |          |
| MBD6     | 12  | 5                  | 7.20E-01 | 5                  | 7.20E-01 | 5                  | 8.75E-01 | 5                  | 8.75E-01 | 2                  | 4.63E-01 | 2                  | 4.63E-01 |
| CMA1     | 14  | 2                  | 7.71E-01 | 2                  | 7.71E-01 | 2                  | 4.63E-01 | 2                  | 4.63E-01 | 1                  | 1.00E+00 | 1                  | 1.00E+00 |
| TOMM70A  | 3   | 2                  | 3.82E-01 | 2                  | 3.82E-01 | 1                  | 4.63E-01 | 1                  | 4.63E-01 | 1                  | 6.04E-01 | 1                  | 6.04E-01 |
| ARHGAP40 | 20  | 1                  | 1.00E+00 | 1                  | 1.00E+00 | 1                  | 4.64E-01 | 1                  | 4.64E-01 | 1                  | 6.06E-01 | 1                  | 6.06E-01 |
| UGT1A7   | 2   | 5                  | 1.23E-01 | 5                  | 1.23E-01 | 2                  | 6.28E-01 | 2                  | 6.28E-01 | 3                  | 4.64E-01 | 3                  | 4.64E-01 |
| HSPA5    | 9   | 1                  | 3.95E-01 | 1                  | 3.95E-01 | 1                  | 4.64E-01 | 1                  | 4.64E-01 |                    |          |                    |          |
| FRAS1    | 4   | 13                 | 1.00E+00 | 13                 | 1.00E+00 | 11                 | 4.64E-01 | 11                 | 4.64E-01 | 9                  | 8.77E-01 | 9                  | 8.77E-01 |
| CCDC66   | 3   | 1                  | 8.65E-01 | 1                  | 8.65E-01 | 1                  | 4.64E-01 | 1                  | 4.64E-01 | 1                  | 6.46E-01 | 1                  | 6.46E-01 |
| NLN      | 5   | 4                  | 2.17E-01 | 4                  | 2.17E-01 | 2                  | 4.64E-01 | 2                  | 4.64E-01 | 2                  | 6.43E-01 | 2                  | 6.43E-01 |
| FOXL2NB  | 3   | 1                  | 4.13E-01 | 1                  | 4.13E-01 | 1                  | 4.64E-01 | 1                  | 4.64E-01 |                    |          |                    |          |
| P3H2     | 3   | 4                  | 3.77E-01 | 4                  | 3.77E-01 | 4                  | 4.64E-01 | 4                  | 4.64E-01 | 1                  | 5.88E-01 | 1                  | 5.88E-01 |
| SPINK8   | 3   | 1                  | 3.80E-01 | 1                  | 3.80E-01 | 1                  | 4.64E-01 | 1                  | 4.64E-01 |                    |          |                    |          |
| DCHS2    | 4   | 8                  | 8.89E-01 | 8                  | 8.89E-01 | 8                  | 4.64E-01 | 8                  | 4.64E-01 | 5                  | 5.40E-01 | 5                  | 5.40E-01 |
| FAM65B   | 6   | 3                  | 1.00E+00 | 3                  | 1.00E+00 | 2                  | 4.65E-01 | 2                  | 4.65E-01 | 3                  | 5.20E-01 | 3                  | 5.20E-01 |
| NXPH2    | 2   | 1                  | 3.99E-01 | 1                  | 3.99E-01 | 1                  | 4.65E-01 | 1                  | 4.65E-01 |                    |          |                    |          |
| CRYZ     | 1   | 2                  | 6.73E-01 | 2                  | 6.73E-01 | 1                  | 4.65E-01 | 1                  | 4.65E-01 | 2                  | 6.34E-01 | 2                  | 6.34E-01 |
| LHX3     | 9   | 3                  | 2.36E-01 | 3                  | 2.36E-01 | 2                  | 6.49E-01 | 2                  | 6.49E-01 | 2                  | 4.65E-01 | 2                  | 4.65E-01 |
| BRI3BP   | 12  | 1                  | 8.86E-01 | 1                  | 8.86E-01 | 1                  | 4.65E-01 | 1                  | 4.65E-01 | 1                  | 6.28E-01 | 1                  | 6.28E-01 |
| GFRA4    | 20  | 2                  | 5.54E-01 | 2                  | 5.54E-01 | 2                  | 4.65E-01 | 2                  | 4.65E-01 | 1                  | 5.28E-01 | 1                  | 5.28E-01 |
| AURKB    | 17  | 1                  | 4.06E-01 | 1                  | 4.06E-01 | 1                  | 4.65E-01 | 1                  | 4.65E-01 |                    |          |                    |          |
| ZMYM5    | 13  | 3                  | 1.00E+00 | 3                  | 1.00E+00 | 2                  | 4.72E-01 | 2                  | 4.72E-01 | 2                  | 4.65E-01 | 2                  | 4.65E-01 |
| MYBPC3   | 11  | 9                  | 7.29E-01 | 9                  | 7.29E-01 | 7                  | 4.65E-01 | 7                  | 4.65E-01 | 2                  | 6.47E-01 | 2                  | 6.47E-01 |
| TRIM8    | 10  | 1                  | 7.56E-02 | 1                  | 7.56E-02 | 1                  | 4.65E-01 | 1                  | 4.65E-01 | 2                  | 7.42E-01 | 2                  | 7.42E-01 |
| KCTD17   | 22  |                    |          |                    |          | 1                  | 4.65E-01 | 1                  | 4.65E-01 | 1                  | 5.33E-01 | 1                  | 5.33E-01 |
| PIP5K1A  | 1   |                    |          |                    |          | 1                  | 4.65E-01 | 1                  | 4.65E-01 | 1                  | 5.33E-01 | 1                  | 5.33E-01 |
| ANKRD35  | 1   |                    |          |                    |          | 1                  | 4.65E-01 | 1                  | 4.65E-01 | 1                  | 5.33E-01 | 1                  | 5.33E-01 |
| MYL2     | 12  |                    |          |                    |          | 1                  | 4.65E-01 | 1                  | 4.65E-01 | 1                  | 5.33E-01 | 1                  | 5.33E-01 |
| RDH11    | 14  |                    |          |                    |          | 1                  | 4.65E-01 | 1                  | 4.65E-01 | 1                  | 5.33E-01 | 1                  | 5.33E-01 |
| TRMT2A   | 22  | 2                  | 3.87E-01 | 2                  | 3.87E-01 | 1                  | 4.65E-01 | 1                  | 4.65E-01 | 1                  | 6.16E-01 | 1                  | 6.16E-01 |
| AMN      | 14  | 1                  | 7.48E-01 | 1                  | 7.48E-01 | 1                  | 4.65E-01 | 1                  | 4.65E-01 |                    |          |                    |          |
| LRG1     | 19  | 2                  | 4.44E-01 | 2                  | 4.44E-01 | 1                  | 4.65E-01 | 1                  | 4.65E-01 | 1                  | 6.00E-01 | 1                  | 6.00E-01 |
| C2CD5    | 12  | 1                  | 7.48E-01 | 1                  | 7.48E-01 | 1                  | 4.65E-01 | 1                  | 4.65E-01 |                    |          |                    |          |
| NHLRC1   | 6   | 1                  | 7.48E-01 | 1                  | 7.48E-01 | 1                  | 4.65E-01 | 1                  | 4.65E-01 |                    |          |                    |          |
| NEU1     | 6   | 1                  | 7.48E-01 | 1                  | 7.48E-01 | 1                  | 4.65E-01 | 1                  | 4.65E-01 |                    |          |                    |          |
| C9orf172 | 9   | 1                  | 7.48E-01 | 1                  | 7.48E-01 | 1                  | 4.65E-01 | 1                  | 4.65E-01 |                    |          |                    |          |

| SetID   | Chr | ADEH- vs NA        |          |                    |          | ADEH+ vs ADEH-     |          |                    |          | ADEH+ vs NA        |          |                    |          |
|---------|-----|--------------------|----------|--------------------|----------|--------------------|----------|--------------------|----------|--------------------|----------|--------------------|----------|
|         |     | rare novel         |          | all                |          | rare novel         |          | all                |          | rare novel         |          | all                |          |
|         |     | N variants in test | p-value  | N variants in test | p-value  | N variants in test | p-value  | N variants in test | p-value  | N variants in test | p-value  | N variants in test | p-value  |
| NRIP3   | 11  | 1                  | 7.48E-01 | 1                  | 7.48E-01 | 1                  | 4.65E-01 | 1                  | 4.65E-01 |                    |          |                    |          |
| ZFP69   | 1   | 3                  | 1.37E-01 | 3                  | 1.37E-01 | 1                  | 4.65E-01 | 1                  | 4.65E-01 | 2                  | 6.55E-01 | 2                  | 6.55E-01 |
| MUC20   | 3   | 1                  | 7.47E-01 | 1                  | 7.47E-01 | 1                  | 4.65E-01 | 1                  | 4.65E-01 |                    |          |                    |          |
| FGR     | 1   | 1                  | 7.47E-01 | 1                  | 7.47E-01 | 1                  | 4.65E-01 | 1                  | 4.65E-01 |                    |          |                    |          |
| KLK13   | 19  | 1                  | 7.47E-01 | 1                  | 7.47E-01 | 1                  | 4.65E-01 | 1                  | 4.65E-01 |                    |          |                    |          |
| ENAH    | 1   | 1                  | 7.41E-01 | 1                  | 7.41E-01 | 1                  | 4.65E-01 | 1                  | 4.65E-01 |                    |          |                    |          |
| OR2D2   | 11  | 1                  | 7.41E-01 | 2                  | 7.73E-01 | 1                  | 4.65E-01 | 2                  | 4.75E-01 |                    |          | 1                  | 6.35E-01 |
| TSPAN4  | 11  | 1                  | 2.41E-01 | 1                  | 2.41E-01 | 1                  | 4.65E-01 | 1                  | 4.65E-01 |                    |          |                    |          |
| MATN4   | 20  | 2                  | 1.00E+00 | 2                  | 1.00E+00 | 2                  | 4.65E-01 | 2                  | 4.65E-01 | 2                  | 4.75E-01 | 2                  | 4.75E-01 |
| TAS2R1  | 5   | 1                  | 7.49E-01 | 1                  | 7.49E-01 | 1                  | 4.65E-01 | 1                  | 4.65E-01 |                    |          |                    |          |
| DIO1    | 1   | 3                  | 1.33E-01 | 3                  | 1.33E-01 | 1                  | 4.65E-01 | 1                  | 4.65E-01 | 2                  | 6.45E-01 | 2                  | 6.45E-01 |
| GABBR1  | 6   | 1                  | 7.49E-01 | 1                  | 7.49E-01 | 1                  | 4.65E-01 | 1                  | 4.65E-01 |                    |          |                    |          |
| SMIM5   | 17  | 2                  | 3.06E-01 | 2                  | 3.06E-01 | 1                  | 4.65E-01 | 1                  | 4.65E-01 | 2                  | 6.40E-01 | 2                  | 6.40E-01 |
| ZNF569  | 19  | 1                  | 7.49E-01 | 1                  | 7.49E-01 | 1                  | 4.65E-01 | 1                  | 4.65E-01 |                    |          |                    |          |
| RNLS    | 10  | 1                  | 7.49E-01 | 1                  | 7.49E-01 | 1                  | 4.65E-01 | 1                  | 4.65E-01 |                    |          |                    |          |
| ZWINT   | 10  | 1                  | 7.49E-01 | 1                  | 7.49E-01 | 1                  | 4.65E-01 | 1                  | 4.65E-01 |                    |          |                    |          |
| TSC2    | 16  | 7                  | 9.05E-01 | 7                  | 9.05E-01 | 6                  | 4.66E-01 | 6                  | 4.66E-01 | 4                  | 7.46E-01 | 4                  | 7.46E-01 |
| ZNF281  | 1   | 2                  | 5.10E-01 | 2                  | 5.10E-01 | 1                  | 4.66E-01 | 1                  | 4.66E-01 | 1                  | 6.24E-01 | 1                  | 6.24E-01 |
| OR56A3  | 11  | 1                  | 7.54E-01 | 1                  | 7.54E-01 | 1                  | 4.66E-01 | 1                  | 4.66E-01 |                    |          |                    |          |
| WDR88   | 19  | 3                  | 1.15E-01 | 4                  | 4.72E-01 | 1                  | 4.66E-01 | 2                  | 8.75E-01 | 2                  | 6.35E-01 | 3                  | 1.00E+00 |
| CCDC134 | 22  | 1                  | 7.54E-01 | 1                  | 7.54E-01 | 1                  | 4.66E-01 | 1                  | 4.66E-01 |                    |          |                    |          |
| MICU2   | 13  | 1                  | 7.54E-01 | 1                  | 7.54E-01 | 1                  | 4.66E-01 | 1                  | 4.66E-01 |                    |          |                    |          |
| NDUFB3  | 2   | 2                  | 3.37E-01 | 2                  | 3.37E-01 | 1                  | 4.66E-01 | 1                  | 4.66E-01 | 1                  | 6.70E-01 | 1                  | 6.70E-01 |
| GAB1    | 4   | 1                  | 7.44E-01 | 1                  | 7.44E-01 | 1                  | 4.66E-01 | 1                  | 4.66E-01 |                    |          |                    |          |
| OR2AK2  | 1   | 1                  | 7.44E-01 | 2                  | 7.44E-01 | 1                  | 4.66E-01 | 2                  | 4.66E-01 |                    |          | 1                  | 7.97E-01 |
| TEX2    | 17  | 3                  | 1.13E-01 | 3                  | 1.13E-01 | 1                  | 4.66E-01 | 1                  | 4.66E-01 | 2                  | 6.35E-01 | 2                  | 6.35E-01 |
| HIBADH  | 7   | 1                  | 7.44E-01 | 1                  | 7.44E-01 | 1                  | 4.66E-01 | 1                  | 4.66E-01 |                    |          |                    |          |
| NUP155  | 5   | 5                  | 8.15E-01 | 5                  | 8.15E-01 | 4                  | 4.66E-01 | 4                  | 4.66E-01 | 2                  | 6.54E-01 | 2                  | 6.54E-01 |
| KCNH4   | 17  | 4                  | 3.86E-02 | 4                  | 3.86E-02 | 1                  | 4.74E-01 | 1                  | 4.74E-01 | 3                  | 4.66E-01 | 3                  | 4.66E-01 |
| TEKT2   | 1   | 3                  | 6.63E-01 | 3                  | 6.63E-01 | 3                  | 4.83E-01 | 3                  | 4.83E-01 | 1                  | 4.66E-01 | 1                  | 4.66E-01 |
| WDFY4   | 10  | 8                  | 8.44E-01 | 8                  | 8.44E-01 | 6                  | 4.66E-01 | 6                  | 4.66E-01 | 2                  | 6.37E-01 | 2                  | 6.37E-01 |
| SLC11A2 | 12  | 2                  | 1.53E-01 | 2                  | 1.53E-01 | 2                  | 4.66E-01 | 2                  | 4.66E-01 |                    |          |                    |          |
| KLF11   | 2   | 4                  | 5.20E-01 | 4                  | 5.20E-01 | 3                  | 4.66E-01 | 3                  | 4.66E-01 | 1                  | 6.11E-01 | 1                  | 6.11E-01 |
| ETV3L   | 1   | 3                  | 4.03E-01 | 3                  | 4.03E-01 | 2                  | 7.13E-01 | 2                  | 7.13E-01 | 3                  | 4.66E-01 | 3                  | 4.66E-01 |
| RBM33   | 7   | 4                  | 3.63E-01 | 4                  | 3.63E-01 | 3                  | 4.66E-01 | 3                  | 4.66E-01 | 1                  | 6.70E-01 | 1                  | 6.70E-01 |
| FXR2    | 17  | 2                  | 4.33E-01 | 2                  | 4.33E-01 | 1                  | 4.66E-01 | 1                  | 4.66E-01 | 1                  | 6.43E-01 | 1                  | 6.43E-01 |
| SCRT1   | 8   | 1                  | 7.46E-01 | 1                  | 7.46E-01 | 1                  | 4.66E-01 | 1                  | 4.66E-01 |                    |          |                    |          |
| FBXO43  | 8   | 1                  | 7.46E-01 | 1                  | 7.46E-01 | 1                  | 4.66E-01 | 1                  | 4.66E-01 |                    |          |                    |          |
| MKX     | 10  | 1                  | 7.46E-01 | 1                  | 7.46E-01 | 1                  | 4.66E-01 | 1                  | 4.66E-01 |                    |          |                    |          |
| MRPL55  | 1   | 1                  | 7.46E-01 | 1                  | 7.46E-01 | 1                  | 4.66E-01 | 1                  | 4.66E-01 |                    |          |                    |          |
| NEMP2   | 2   | 1                  | 7.46E-01 | 1                  | 7.46E-01 | 1                  | 4.66E-01 | 1                  | 4.66E-01 |                    |          |                    |          |
| SMURF1  | 7   | 1                  | 7.46E-01 | 1                  | 7.46E-01 | 1                  | 4.66E-01 | 1                  | 4.66E-01 |                    |          |                    |          |
| SPI1    | 11  | 1                  | 6.83E-01 | 1                  | 6.83E-01 | 1                  | 4.66E-01 | 1                  | 4.66E-01 | 1                  | 6.30E-01 | 1                  | 6.30E-01 |
| SH3BP4  | 2   | 1                  | 7.55E-01 | 1                  | 7.55E-01 | 1                  | 4.67E-01 | 1                  | 4.67E-01 |                    |          |                    |          |
| CHD4    | 12  | 2                  | 2.65E-01 | 2                  | 2.65E-01 | 1                  | 4.67E-01 | 1                  | 4.67E-01 | 2                  | 6.27E-01 | 2                  | 6.27E-01 |
| PRSS56  | 2   | 1                  | 7.55E-01 | 1                  | 7.55E-01 | 1                  | 4.67E-01 | 1                  | 4.67E-01 |                    |          |                    |          |
| AKIRIN1 | 1   | 1                  | 7.55E-01 | 1                  | 7.55E-01 | 1                  | 4.67E-01 | 1                  | 4.67E-01 |                    |          |                    |          |
| CDH12   | 5   | 1                  | 7.55E-01 | 1                  | 7.55E-01 | 1                  | 4.67E-01 | 1                  | 4.67E-01 |                    |          |                    |          |

| SetID    | Chr | ADEH- vs NA        |          |                    |          | ADEH+ vs ADEH-     |          |                    |          | ADEH+ vs NA        |          |                    |          |
|----------|-----|--------------------|----------|--------------------|----------|--------------------|----------|--------------------|----------|--------------------|----------|--------------------|----------|
|          |     | rarenovel          |          | all                |          | rarenovel          |          | all                |          | rarenovel          |          | all                |          |
|          |     | N variants in test | p-value  | N variants in test | p-value  | N variants in test | p-value  | N variants in test | p-value  | N variants in test | p-value  | N variants in test | p-value  |
| DSTN     | 20  | 1                  | 7.55E-01 | 1                  | 7.55E-01 | 1                  | 4.67E-01 | 1                  | 4.67E-01 |                    |          |                    |          |
| F13B     | 1   | 1                  | 7.55E-01 | 1                  | 7.55E-01 | 1                  | 4.67E-01 | 1                  | 4.67E-01 |                    |          |                    |          |
| POLR3E   | 16  | 3                  | 1.08E-01 | 3                  | 1.08E-01 | 1                  | 4.67E-01 | 1                  | 4.67E-01 | 3                  | 1.00E+00 | 3                  | 1.00E+00 |
| MANSC1   | 12  | 1                  | 7.47E-01 | 1                  | 7.47E-01 | 1                  | 4.67E-01 | 1                  | 4.67E-01 |                    |          |                    |          |
| HS3ST3B1 | 17  | 1                  | 7.47E-01 | 1                  | 7.47E-01 | 1                  | 4.67E-01 | 1                  | 4.67E-01 |                    |          |                    |          |
| ZNF311   | 6   | 2                  | 4.82E-01 | 2                  | 4.82E-01 | 1                  | 4.67E-01 | 1                  | 4.67E-01 | 1                  | 5.98E-01 | 1                  | 5.98E-01 |
| RFNG     | 17  | 1                  | 7.47E-01 | 1                  | 7.47E-01 | 1                  | 4.67E-01 | 1                  | 4.67E-01 |                    |          |                    |          |
| MRPL21   | 11  | 2                  | 7.84E-01 | 2                  | 7.84E-01 | 2                  | 5.91E-01 | 2                  | 5.91E-01 | 1                  | 4.67E-01 | 1                  | 4.67E-01 |
| FOXE3    | 1   | 2                  | 4.15E-01 | 2                  | 4.15E-01 | 1                  | 4.67E-01 | 1                  | 4.67E-01 | 1                  | 6.64E-01 | 1                  | 6.64E-01 |
| LARP1    | 5   | 2                  | 2.99E-01 | 2                  | 2.99E-01 | 1                  | 4.67E-01 | 1                  | 4.67E-01 | 1                  | 6.18E-01 | 1                  | 6.18E-01 |
| FBXO22   | 15  | 3                  | 1.02E-01 | 3                  | 1.02E-01 | 1                  | 4.67E-01 | 1                  | 4.67E-01 | 2                  | 6.47E-01 | 2                  | 6.47E-01 |
| LRRC46   | 17  | 3                  | 1.15E-01 | 3                  | 1.15E-01 | 1                  | 4.67E-01 | 1                  | 4.67E-01 | 2                  | 6.10E-01 | 2                  | 6.10E-01 |
| EMCN     | 4   | 1                  | 7.48E-01 | 1                  | 7.48E-01 | 1                  | 4.67E-01 | 1                  | 4.67E-01 |                    |          |                    |          |
| DMAP1    | 1   | 1                  | 7.48E-01 | 1                  | 7.48E-01 | 1                  | 4.67E-01 | 1                  | 4.67E-01 |                    |          |                    |          |
| FGF22    | 19  | 1                  | 7.48E-01 | 1                  | 7.48E-01 | 1                  | 4.67E-01 | 1                  | 4.67E-01 |                    |          |                    |          |
| MRT04    | 1   | 2                  | 2.92E-01 | 2                  | 2.92E-01 | 1                  | 4.67E-01 | 1                  | 4.67E-01 | 1                  | 6.57E-01 | 1                  | 6.57E-01 |
| CYGB     | 17  | 1                  | 7.48E-01 | 1                  | 7.48E-01 | 1                  | 4.67E-01 | 1                  | 4.67E-01 |                    |          |                    |          |
| GFPT1    | 2   | 1                  | 7.48E-01 | 1                  | 7.48E-01 | 1                  | 4.67E-01 | 1                  | 4.67E-01 |                    |          |                    |          |
| KRT81    | 12  | 1                  | 7.48E-01 | 1                  | 7.48E-01 | 1                  | 4.67E-01 | 1                  | 4.67E-01 |                    |          |                    |          |
| PHRF1    | 11  | 2                  | 7.43E-01 | 2                  | 7.43E-01 | 2                  | 7.45E-01 | 2                  | 7.45E-01 | 1                  | 4.67E-01 | 1                  | 4.67E-01 |
| WDR25    | 14  | 3                  | 2.04E-02 | 3                  | 2.04E-02 | 1                  | 5.05E-01 | 1                  | 5.05E-01 | 2                  | 4.67E-01 | 2                  | 4.67E-01 |
| OR6K3    | 1   | 1                  | 4.11E-01 | 1                  | 4.11E-01 | 1                  | 4.67E-01 | 1                  | 4.67E-01 |                    |          |                    |          |
| MIA3     | 1   | 4                  | 5.91E-01 | 5                  | 5.92E-01 | 2                  | 4.67E-01 | 3                  | 4.97E-01 | 3                  | 4.72E-01 | 4                  | 5.19E-01 |
| XRR1     | 11  | 7                  | 1.00E+00 | 7                  | 1.00E+00 | 6                  | 4.67E-01 | 6                  | 4.67E-01 | 3                  | 5.11E-01 | 3                  | 5.11E-01 |
| COQ6     | 14  | 5                  | 5.78E-01 | 5                  | 5.78E-01 | 4                  | 4.67E-01 | 4                  | 4.67E-01 | 1                  | 6.45E-01 | 1                  | 6.45E-01 |
| GDPGP1   | 15  | 1                  | 7.50E-01 | 1                  | 7.50E-01 | 1                  | 4.67E-01 | 1                  | 4.67E-01 |                    |          |                    |          |
| MAP3K10  | 19  | 1                  | 6.86E-01 | 1                  | 6.86E-01 | 1                  | 4.67E-01 | 1                  | 4.67E-01 | 1                  | 6.34E-01 | 1                  | 6.34E-01 |
| UXS1     | 2   | 1                  | 7.50E-01 | 1                  | 7.50E-01 | 1                  | 4.67E-01 | 1                  | 4.67E-01 |                    |          |                    |          |
| PKDREJ   | 22  | 5                  | 1.10E-01 | 5                  | 1.10E-01 | 5                  | 4.67E-01 | 5                  | 4.67E-01 |                    |          |                    |          |
| TTYH1    | 19  | 1                  | 3.95E-01 | 1                  | 3.95E-01 | 1                  | 4.67E-01 | 1                  | 4.67E-01 |                    |          |                    |          |
| ASAH2    | 10  | 3                  | 6.75E-01 | 3                  | 6.75E-01 | 2                  | 4.67E-01 | 2                  | 4.67E-01 | 2                  | 6.27E-01 | 2                  | 6.27E-01 |
| TRPM7    | 15  | 5                  | 5.39E-01 | 5                  | 5.39E-01 | 3                  | 7.76E-01 | 3                  | 7.76E-01 | 3                  | 4.67E-01 | 3                  | 4.67E-01 |
| COL7A1   | 3   | 15                 | 1.00E+00 | 16                 | 6.82E-01 | 13                 | 4.95E-01 | 14                 | 4.67E-01 | 9                  | 6.90E-01 | 10                 | 7.42E-01 |
| SLC7A7   | 14  | 3                  | 1.00E+00 | 3                  | 1.00E+00 | 3                  | 4.67E-01 | 3                  | 4.67E-01 | 1                  | 4.85E-01 | 1                  | 4.85E-01 |
| LRRC4B   | 19  | 1                  | 7.45E-01 | 1                  | 7.45E-01 | 1                  | 4.67E-01 | 1                  | 4.67E-01 |                    |          |                    |          |
| UQCRC1   | 3   | 1                  | 7.45E-01 | 1                  | 7.45E-01 | 1                  | 4.67E-01 | 1                  | 4.67E-01 |                    |          |                    |          |
| LGSN     | 6   | 1                  | 7.45E-01 | 1                  | 7.45E-01 | 1                  | 4.67E-01 | 1                  | 4.67E-01 |                    |          |                    |          |
| IGF2R    | 6   | 9                  | 4.94E-01 | 9                  | 4.94E-01 | 7                  | 4.67E-01 | 7                  | 4.67E-01 | 4                  | 4.82E-01 | 4                  | 4.82E-01 |
| FBXO18   | 10  | 2                  | 3.79E-01 | 2                  | 3.79E-01 | 1                  | 4.68E-01 | 1                  | 4.68E-01 | 1                  | 6.44E-01 | 1                  | 6.44E-01 |
| PXN      | 12  | 1                  | 7.45E-01 | 1                  | 7.45E-01 | 1                  | 4.68E-01 | 1                  | 4.68E-01 |                    |          |                    |          |
| SURF1    | 9   | 2                  | 3.63E-01 | 2                  | 3.63E-01 | 1                  | 4.68E-01 | 1                  | 4.68E-01 | 1                  | 5.95E-01 | 1                  | 5.95E-01 |
| NEIL1    | 15  | 2                  | 3.64E-01 | 2                  | 3.64E-01 | 1                  | 4.68E-01 | 1                  | 4.68E-01 | 1                  | 6.41E-01 | 1                  | 6.41E-01 |
| SKAP2    | 7   | 1                  | 7.45E-01 | 1                  | 7.45E-01 | 1                  | 4.68E-01 | 1                  | 4.68E-01 |                    |          |                    |          |
| SHMT1    | 17  | 3                  | 9.10E-02 | 3                  | 9.10E-02 | 2                  | 6.65E-01 | 2                  | 6.65E-01 | 1                  | 4.68E-01 | 1                  | 4.68E-01 |
| PPP4R1   | 18  | 1                  | 7.47E-01 | 1                  | 7.47E-01 | 1                  | 4.68E-01 | 1                  | 4.68E-01 |                    |          |                    |          |
| AP2A1    | 19  | 1                  | 7.47E-01 | 1                  | 7.47E-01 | 1                  | 4.68E-01 | 1                  | 4.68E-01 |                    |          |                    |          |
| METTL14  | 4   | 1                  | 7.47E-01 | 1                  | 7.47E-01 | 1                  | 4.68E-01 | 1                  | 4.68E-01 |                    |          |                    |          |
| SENP3    | 17  | 1                  | 7.47E-01 | 1                  | 7.47E-01 | 1                  | 4.68E-01 | 1                  | 4.68E-01 |                    |          |                    |          |

| SetID    | Chr | ADEH- vs NA        |          |                    |          | ADEH+ vs ADEH-     |          |                    |          | ADEH+ vs NA        |          |                    |          |
|----------|-----|--------------------|----------|--------------------|----------|--------------------|----------|--------------------|----------|--------------------|----------|--------------------|----------|
|          |     | rarenovel          |          | all                |          | rarenovel          |          | all                |          | rarenovel          |          | all                |          |
|          |     | N variants in test | p-value  | N variants in test | p-value  | N variants in test | p-value  | N variants in test | p-value  | N variants in test | p-value  | N variants in test | p-value  |
| TBCB     | 19  | 1                  | 7.47E-01 | 1                  | 7.47E-01 | 1                  | 4.68E-01 | 1                  | 4.68E-01 |                    |          |                    |          |
| ANKRD7   | 7   | 1                  | 7.51E-01 | 1                  | 7.51E-01 | 1                  | 4.68E-01 | 1                  | 4.68E-01 |                    |          |                    |          |
| PTCHD4   | 6   | 1                  | 7.51E-01 | 1                  | 7.51E-01 | 1                  | 4.68E-01 | 1                  | 4.68E-01 |                    |          |                    |          |
| PTPN5    | 11  | 1                  | 7.51E-01 | 1                  | 7.51E-01 | 1                  | 4.68E-01 | 1                  | 4.68E-01 |                    |          |                    |          |
| SLC22A8  | 11  | 1                  | 7.51E-01 | 1                  | 7.51E-01 | 1                  | 4.68E-01 | 1                  | 4.68E-01 |                    |          |                    |          |
| MARK3    | 14  | 1                  | 6.90E-01 | 1                  | 6.90E-01 | 1                  | 4.68E-01 | 1                  | 4.68E-01 | 1                  | 6.26E-01 | 1                  | 6.26E-01 |
| ARHGEF11 | 1   | 2                  | 2.80E-01 | 2                  | 2.80E-01 | 1                  | 4.68E-01 | 1                  | 4.68E-01 | 2                  | 6.38E-01 | 2                  | 6.38E-01 |
| TMEM54   | 1   | 3                  | 1.46E-01 | 3                  | 1.46E-01 | 1                  | 4.68E-01 | 1                  | 4.68E-01 | 2                  | 6.45E-01 | 2                  | 6.45E-01 |
| ABI3     | 17  | 2                  | 4.88E-01 | 2                  | 4.88E-01 | 1                  | 4.68E-01 | 1                  | 4.68E-01 | 1                  | 6.29E-01 | 1                  | 6.29E-01 |
| KDM3B    | 5   | 1                  | 7.51E-01 | 1                  | 7.51E-01 | 1                  | 4.68E-01 | 1                  | 4.68E-01 |                    |          |                    |          |
| ZZZ3     | 1   | 3                  | 1.66E-01 | 3                  | 1.66E-01 | 1                  | 4.68E-01 | 1                  | 4.68E-01 | 2                  | 6.32E-01 | 2                  | 6.32E-01 |
| ZFC3H1   | 12  | 4                  | 7.65E-01 | 4                  | 7.65E-01 | 3                  | 4.68E-01 | 3                  | 4.68E-01 | 2                  | 6.43E-01 | 2                  | 6.43E-01 |
| CSRNP2   | 12  | 1                  | 4.09E-01 | 1                  | 4.09E-01 | 1                  | 4.68E-01 | 1                  | 4.68E-01 |                    |          |                    |          |
| ITGA8    | 10  | 4                  | 3.76E-01 | 4                  | 3.76E-01 | 3                  | 4.68E-01 | 3                  | 4.68E-01 | 1                  | 6.38E-01 | 1                  | 6.38E-01 |
| PPP1R13L | 19  | 1                  | 4.08E-01 | 1                  | 4.08E-01 | 1                  | 4.68E-01 | 1                  | 4.68E-01 |                    |          |                    |          |
| ZNF836   | 19  | 3                  | 1.92E-01 | 3                  | 1.92E-01 | 3                  | 4.68E-01 | 3                  | 4.68E-01 | 1                  | 1.00E+00 | 1                  | 1.00E+00 |
| MON2     | 12  | 2                  | 1.16E-01 | 2                  | 1.16E-01 | 1                  | 1.00E+00 | 1                  | 1.00E+00 | 2                  | 4.68E-01 | 2                  | 4.68E-01 |
| SERPINA1 | 14  | 7                  | 2.84E-01 | 8                  | 4.94E-01 | 6                  | 4.68E-01 | 7                  | 6.27E-01 | 3                  | 1.00E+00 | 4                  | 1.00E+00 |
| ALKBH6   | 19  | 1                  | 5.94E-01 | 1                  | 5.94E-01 | 1                  | 4.68E-01 | 1                  | 4.68E-01 | 1                  | 6.01E-01 | 1                  | 6.01E-01 |
| PATL2    | 15  | 5                  | 1.60E-01 | 5                  | 1.60E-01 | 5                  | 4.68E-01 | 5                  | 4.68E-01 |                    |          |                    |          |
| R3HDML   | 20  | 1                  | 7.57E-01 | 1                  | 7.57E-01 | 1                  | 4.68E-01 | 1                  | 4.68E-01 |                    |          |                    |          |
| INHA     | 2   | 2                  | 4.63E-01 | 2                  | 4.63E-01 | 1                  | 4.68E-01 | 1                  | 4.68E-01 | 1                  | 6.40E-01 | 1                  | 6.40E-01 |
| TMEM38B  | 9   | 1                  | 7.57E-01 | 1                  | 7.57E-01 | 1                  | 4.68E-01 | 1                  | 4.68E-01 |                    |          |                    |          |
| ENO1     | 1   | 1                  | 7.57E-01 | 1                  | 7.57E-01 | 1                  | 4.68E-01 | 1                  | 4.68E-01 |                    |          |                    |          |
| POLK     | 5   | 5                  | 5.52E-01 | 5                  | 5.52E-01 | 3                  | 7.65E-01 | 3                  | 7.65E-01 | 3                  | 4.69E-01 | 3                  | 4.69E-01 |
| CEP126   | 11  | 4                  | 6.87E-01 | 5                  | 1.00E+00 | 4                  | 1.00E+00 | 5                  | 4.69E-01 | 2                  | 1.00E+00 | 3                  | 5.25E-01 |
| ZNF470   | 19  | 5                  | 7.23E-02 | 5                  | 7.23E-02 | 3                  | 6.35E-01 | 3                  | 6.35E-01 | 2                  | 4.69E-01 | 2                  | 4.69E-01 |
| PCDHA4   | 5   | 4                  | 8.27E-01 | 4                  | 8.27E-01 | 3                  | 4.69E-01 | 3                  | 4.69E-01 | 2                  | 4.78E-01 | 2                  | 4.78E-01 |
| ZNF224   | 19  | 2                  | 4.14E-01 | 2                  | 4.14E-01 | 1                  | 4.69E-01 | 1                  | 4.69E-01 | 1                  | 6.06E-01 | 1                  | 6.06E-01 |
| RFX3     | 9   | 1                  | 7.47E-01 | 1                  | 7.47E-01 | 1                  | 4.69E-01 | 1                  | 4.69E-01 |                    |          |                    |          |
| ECT2     | 3   | 1                  | 7.47E-01 | 1                  | 7.47E-01 | 1                  | 4.69E-01 | 1                  | 4.69E-01 |                    |          |                    |          |
| MYO19    | 17  | 1                  | 7.47E-01 | 1                  | 7.47E-01 | 1                  | 4.69E-01 | 1                  | 4.69E-01 |                    |          |                    |          |
| OSER1    | 20  | 1                  | 7.47E-01 | 1                  | 7.47E-01 | 1                  | 4.69E-01 | 1                  | 4.69E-01 |                    |          |                    |          |
| SFTPA2   | 10  | 1                  | 7.47E-01 | 1                  | 7.47E-01 | 1                  | 4.69E-01 | 1                  | 4.69E-01 |                    |          |                    |          |
| EFCAB12  | 3   | 4                  | 8.67E-01 | 5                  | 7.61E-01 | 3                  | 4.69E-01 | 4                  | 6.80E-01 | 2                  | 6.45E-01 | 3                  | 9.16E-01 |
| BCR      | 22  | 4                  | 4.08E-01 | 4                  | 4.08E-01 | 4                  | 4.69E-01 | 4                  | 4.69E-01 | 1                  | 6.53E-01 | 1                  | 6.53E-01 |
| MOCOS    | 18  | 1                  | 7.52E-01 | 1                  | 7.52E-01 | 1                  | 4.69E-01 | 1                  | 4.69E-01 |                    |          |                    |          |
| TUB      | 11  | 1                  | 7.52E-01 | 1                  | 7.52E-01 | 1                  | 4.69E-01 | 1                  | 4.69E-01 |                    |          |                    |          |
| ZSWIM3   | 20  | 3                  | 1.55E-01 | 3                  | 1.55E-01 | 1                  | 4.69E-01 | 1                  | 4.69E-01 | 2                  | 6.38E-01 | 2                  | 6.38E-01 |
| SEC22A   | 3   | 3                  | 1.08E-01 | 3                  | 1.08E-01 | 1                  | 4.69E-01 | 1                  | 4.69E-01 | 2                  | 6.44E-01 | 2                  | 6.44E-01 |
| BTG4     | 11  | 1                  | 7.52E-01 | 1                  | 7.52E-01 | 1                  | 4.69E-01 | 1                  | 4.69E-01 |                    |          |                    |          |
| GHR      | 5   | 1                  | 7.43E-01 | 1                  | 7.43E-01 | 1                  | 4.69E-01 | 1                  | 4.69E-01 |                    |          |                    |          |
| KCNMB1   | 5   | 1                  | 7.43E-01 | 1                  | 7.43E-01 | 1                  | 4.69E-01 | 1                  | 4.69E-01 |                    |          |                    |          |
| PRSS16   | 6   | 2                  | 3.97E-01 | 2                  | 3.97E-01 | 1                  | 4.69E-01 | 1                  | 4.69E-01 | 1                  | 6.04E-01 | 1                  | 6.04E-01 |
| PRR27    | 4   | 1                  | 7.43E-01 | 1                  | 7.43E-01 | 1                  | 4.69E-01 | 1                  | 4.69E-01 |                    |          |                    |          |
| QPCT     | 2   | 4                  | 2.62E-01 | 4                  | 2.62E-01 | 5                  | 4.69E-01 | 5                  | 4.69E-01 | 4                  | 6.47E-01 | 4                  | 6.47E-01 |
| TTC39A   | 1   | 3                  | 7.87E-01 | 3                  | 7.87E-01 | 3                  | 8.48E-01 | 3                  | 8.48E-01 | 1                  | 4.69E-01 | 1                  | 4.69E-01 |
| FAM212A  | 3   | 1                  | 8.31E-01 | 1                  | 8.31E-01 | 1                  | 4.69E-01 | 1                  | 4.69E-01 | 1                  | 6.28E-01 | 1                  | 6.28E-01 |

| SetID    | Chr | ADEH- vs NA        |          |                    |          | ADEH+ vs ADEH-     |          |                    |          | ADEH+ vs NA        |          |                    |          |
|----------|-----|--------------------|----------|--------------------|----------|--------------------|----------|--------------------|----------|--------------------|----------|--------------------|----------|
|          |     | rarenovel          |          | all                |          | rarenovel          |          | all                |          | rarenovel          |          | all                |          |
|          |     | N variants in test | p-value  | N variants in test | p-value  | N variants in test | p-value  | N variants in test | p-value  | N variants in test | p-value  | N variants in test | p-value  |
| ANXA13   | 8   | 1                  | 7.58E-01 | 1                  | 7.58E-01 | 1                  | 4.69E-01 | 1                  | 4.69E-01 |                    |          |                    |          |
| RNF10    | 12  | 1                  | 7.58E-01 | 1                  | 7.58E-01 | 1                  | 4.69E-01 | 1                  | 4.69E-01 |                    |          |                    |          |
| MRPS2    | 9   | 2                  | 4.35E-01 | 2                  | 4.35E-01 | 1                  | 4.69E-01 | 1                  | 4.69E-01 | 1                  | 6.22E-01 | 1                  | 6.22E-01 |
| RHBDD1   | 2   | 1                  | 7.58E-01 | 1                  | 7.58E-01 | 1                  | 4.69E-01 | 1                  | 4.69E-01 |                    |          |                    |          |
| KCNB2    | 8   | 1                  | 7.58E-01 | 1                  | 7.58E-01 | 1                  | 4.69E-01 | 1                  | 4.69E-01 |                    |          |                    |          |
| CHAF1A   | 19  | 2                  | 2.78E-01 | 2                  | 2.78E-01 | 1                  | 4.69E-01 | 1                  | 4.69E-01 | 2                  | 6.12E-01 | 2                  | 6.12E-01 |
| CNRIP1   | 2   | 1                  | 7.58E-01 | 1                  | 7.58E-01 | 1                  | 4.69E-01 | 1                  | 4.69E-01 |                    |          |                    |          |
| NFYA     | 6   | 1                  | 7.58E-01 | 1                  | 7.58E-01 | 1                  | 4.69E-01 | 1                  | 4.69E-01 |                    |          |                    |          |
| SLC25A39 | 17  | 2                  | 2.72E-02 | 2                  | 2.72E-02 | 1                  | 4.99E-01 | 1                  | 4.99E-01 | 1                  | 4.70E-01 | 1                  | 4.70E-01 |
| ZNF335   | 20  | 7                  | 3.05E-02 | 7                  | 3.05E-02 | 2                  | 6.18E-01 | 2                  | 6.18E-01 | 5                  | 4.70E-01 | 5                  | 4.70E-01 |
| ART1     | 11  | 2                  | 5.50E-01 | 2                  | 5.50E-01 | 2                  | 4.70E-01 | 2                  | 4.70E-01 | 1                  | 6.17E-01 | 1                  | 6.17E-01 |
| EMID1    | 22  | 2                  | 6.88E-03 | 2                  | 6.88E-03 |                    |          |                    |          | 2                  | 4.70E-01 | 2                  | 4.70E-01 |
| PLA2R1   | 2   | 4                  | 2.93E-01 | 4                  | 2.93E-01 | 2                  | 6.24E-01 | 2                  | 6.24E-01 | 3                  | 4.70E-01 | 3                  | 4.70E-01 |
| GOLGA4   | 3   | 13                 | 1.90E-01 | 14                 | 1.90E-01 | 9                  | 4.70E-01 | 10                 | 4.70E-01 | 6                  | 8.64E-01 | 7                  | 8.64E-01 |
| MST1R    | 3   | 10                 | 3.92E-01 | 10                 | 3.92E-01 | 9                  | 6.86E-01 | 9                  | 6.86E-01 | 2                  | 4.70E-01 | 2                  | 4.70E-01 |
| CFLAR    | 2   | 1                  | 7.51E-01 | 1                  | 7.51E-01 | 1                  | 4.70E-01 | 1                  | 4.70E-01 |                    |          |                    |          |
| NARS2    | 11  | 1                  | 7.51E-01 | 1                  | 7.51E-01 | 1                  | 4.70E-01 | 1                  | 4.70E-01 |                    |          |                    |          |
| CAMK2G   | 10  | 1                  | 7.51E-01 | 1                  | 7.51E-01 | 1                  | 4.70E-01 | 1                  | 4.70E-01 |                    |          |                    |          |
| TBPL2    | 14  | 1                  | 7.51E-01 | 1                  | 7.51E-01 | 1                  | 4.70E-01 | 1                  | 4.70E-01 |                    |          |                    |          |
| SLC22A1  | 6   | 6                  | 6.67E-01 | 7                  | 6.86E-01 | 6                  | 4.70E-01 | 7                  | 5.09E-01 | 5                  | 6.04E-01 | 6                  | 5.99E-01 |
| SEMG1    | 20  | 4                  | 4.09E-01 | 4                  | 4.09E-01 | 3                  | 6.60E-01 | 3                  | 6.60E-01 | 2                  | 4.70E-01 | 2                  | 4.70E-01 |
| KCNJ16   | 17  | 5                  | 2.12E-01 | 5                  | 2.12E-01 | 2                  | 5.81E-01 | 2                  | 5.81E-01 | 3                  | 4.71E-01 | 3                  | 4.71E-01 |
| TMEM52B  | 12  | 1                  | 7.44E-01 | 1                  | 7.44E-01 | 1                  | 4.71E-01 | 1                  | 4.71E-01 |                    |          |                    |          |
| SGPL1    | 10  | 1                  | 7.44E-01 | 1                  | 7.44E-01 | 1                  | 4.71E-01 | 1                  | 4.71E-01 |                    |          |                    |          |
| CAPN5    | 11  | 2                  | 4.29E-01 | 2                  | 4.29E-01 | 1                  | 4.71E-01 | 1                  | 4.71E-01 | 1                  | 6.00E-01 | 1                  | 6.00E-01 |
| TMPRSS12 | 12  | 2                  | 3.82E-01 | 2                  | 3.82E-01 | 1                  | 4.71E-01 | 1                  | 4.71E-01 | 1                  | 6.41E-01 | 1                  | 6.41E-01 |
| KRT4     | 12  | 2                  | 2.93E-01 | 2                  | 2.93E-01 | 1                  | 4.71E-01 | 1                  | 4.71E-01 | 2                  | 6.45E-01 | 2                  | 6.45E-01 |
| ZNF184   | 6   | 1                  | 7.44E-01 | 1                  | 7.44E-01 | 1                  | 4.71E-01 | 1                  | 4.71E-01 |                    |          |                    |          |
| GCKR     | 2   | 4                  | 3.43E-02 | 4                  | 3.43E-02 | 1                  | 4.71E-01 | 1                  | 4.71E-01 | 3                  | 5.08E-01 | 3                  | 5.08E-01 |
| CST9     | 20  | 1                  | 7.44E-01 | 1                  | 7.44E-01 | 1                  | 4.71E-01 | 1                  | 4.71E-01 |                    |          |                    |          |
| HIGD1B   | 17  | 1                  | 7.44E-01 | 1                  | 7.44E-01 | 1                  | 4.71E-01 | 1                  | 4.71E-01 |                    |          |                    |          |
| PQLC3    | 2   | 1                  | 7.44E-01 | 1                  | 7.44E-01 | 1                  | 4.71E-01 | 1                  | 4.71E-01 |                    |          |                    |          |
| SH3RF3   | 2   | 4                  | 7.33E-01 | 5                  | 7.33E-01 | 4                  | 4.71E-01 | 5                  | 4.71E-01 | 2                  | 1.00E+00 | 3                  | 1.00E+00 |
| INTS2    | 17  | 7                  | 6.10E-01 | 7                  | 6.10E-01 | 5                  | 4.71E-01 | 5                  | 4.71E-01 | 2                  | 6.37E-01 | 2                  | 6.37E-01 |
| WDR66    | 12  | 3                  | 6.29E-02 | 3                  | 6.29E-02 | 2                  | 4.71E-01 | 2                  | 4.71E-01 | 3                  | 7.01E-01 | 3                  | 7.01E-01 |
| KIRREL   | 1   | 4                  | 4.38E-01 | 4                  | 4.38E-01 | 3                  | 7.76E-01 | 3                  | 7.76E-01 | 3                  | 4.71E-01 | 3                  | 4.71E-01 |
| MFN2     | 1   | 2                  | 4.68E-01 | 2                  | 4.68E-01 | 1                  | 4.71E-01 | 1                  | 4.71E-01 | 1                  | 5.79E-01 | 1                  | 5.79E-01 |
| HTR3C    | 3   | 1                  | 7.53E-01 | 1                  | 7.53E-01 | 1                  | 4.71E-01 | 1                  | 4.71E-01 |                    |          |                    |          |
| RPUSD2   | 15  | 1                  | 7.53E-01 | 1                  | 7.53E-01 | 1                  | 4.71E-01 | 1                  | 4.71E-01 |                    |          |                    |          |
| SPAG4    | 20  | 3                  | 7.93E-02 | 3                  | 7.93E-02 | 2                  | 6.57E-01 | 2                  | 6.57E-01 | 1                  | 4.71E-01 | 1                  | 4.71E-01 |
| TAS2R5   | 7   | 2                  | 1.00E+00 | 2                  | 1.00E+00 | 2                  | 4.94E-01 | 2                  | 4.94E-01 | 2                  | 4.71E-01 | 2                  | 4.71E-01 |
| EYA2     | 20  | 2                  | 2.23E-01 | 2                  | 2.23E-01 | 1                  | 4.71E-01 | 1                  | 4.71E-01 | 1                  | 6.47E-01 | 1                  | 6.47E-01 |
| SAMD9L   | 7   | 5                  | 5.73E-01 | 5                  | 5.73E-01 | 4                  | 4.71E-01 | 4                  | 4.71E-01 | 4                  | 5.40E-01 | 4                  | 5.40E-01 |
| ZNF518B  | 4   | 1                  | 7.51E-01 | 1                  | 7.51E-01 | 1                  | 4.71E-01 | 1                  | 4.71E-01 |                    |          |                    |          |
| TM9SF1   | 14  | 1                  | 7.51E-01 | 1                  | 7.51E-01 | 1                  | 4.71E-01 | 1                  | 4.71E-01 |                    |          |                    |          |
| C3orf67  | 3   | 1                  | 7.51E-01 | 1                  | 7.51E-01 | 1                  | 4.71E-01 | 1                  | 4.71E-01 |                    |          |                    |          |
| ANAPC4   | 4   | 1                  | 7.51E-01 | 1                  | 7.51E-01 | 1                  | 4.71E-01 | 1                  | 4.71E-01 |                    |          |                    |          |
| MYL10    | 7   | 2                  | 3.58E-01 | 2                  | 3.58E-01 | 1                  | 4.71E-01 | 1                  | 4.71E-01 | 1                  | 6.06E-01 | 1                  | 6.06E-01 |

| SetID    | Chr | ADEH- vs NA        |          |                    |          | ADEH+ vs ADEH-     |          |                    |          | ADEH+ vs NA        |          |                    |          |
|----------|-----|--------------------|----------|--------------------|----------|--------------------|----------|--------------------|----------|--------------------|----------|--------------------|----------|
|          |     | rare novel         |          | all                |          | rare novel         |          | all                |          | rare novel         |          | all                |          |
|          |     | N variants in test | p-value  | N variants in test | p-value  | N variants in test | p-value  | N variants in test | p-value  | N variants in test | p-value  | N variants in test | p-value  |
| TLCD1    | 17  | 1                  | 7.51E-01 | 1                  | 7.51E-01 | 1                  | 4.71E-01 | 1                  | 4.71E-01 |                    |          |                    |          |
| ABI3BP   | 3   | 7                  | 4.61E-02 | 7                  | 4.61E-02 | 5                  | 4.71E-01 | 5                  | 4.71E-01 | 4                  | 5.69E-01 | 4                  | 5.69E-01 |
| PRR16    | 5   | 3                  | 4.51E-01 | 3                  | 4.51E-01 | 3                  | 4.71E-01 | 3                  | 4.71E-01 | 1                  | 6.65E-01 | 1                  | 6.65E-01 |
| HPX      | 11  | 4                  | 5.92E-01 | 4                  | 5.92E-01 | 3                  | 8.33E-01 | 3                  | 8.33E-01 | 3                  | 4.71E-01 | 3                  | 4.71E-01 |
| RGL3     | 19  | 2                  | 3.90E-01 | 2                  | 3.90E-01 | 1                  | 4.72E-01 | 1                  | 4.72E-01 | 1                  | 6.65E-01 | 1                  | 6.65E-01 |
| AMH      | 19  | 2                  | 3.28E-01 | 2                  | 3.28E-01 | 1                  | 4.72E-01 | 1                  | 4.72E-01 | 1                  | 6.43E-01 | 1                  | 6.43E-01 |
| WDSUB1   | 2   | 2                  | 6.17E-01 | 2                  | 6.17E-01 | 1                  | 4.72E-01 | 1                  | 4.72E-01 | 2                  | 6.24E-01 | 2                  | 6.24E-01 |
| OBSCN    | 1   | 46                 | 3.79E-01 | 47                 | 2.17E-01 | 33                 | 6.25E-01 | 34                 | 6.75E-01 | 27                 | 5.71E-01 | 28                 | 4.72E-01 |
| PHLDB2   | 3   | 5                  | 1.09E-01 | 5                  | 1.09E-01 | 5                  | 4.72E-01 | 5                  | 4.72E-01 |                    |          |                    |          |
| MAMDC4   | 9   | 5                  | 6.00E-02 | 5                  | 6.00E-02 | 3                  | 6.57E-01 | 3                  | 6.57E-01 | 2                  | 4.72E-01 | 2                  | 4.72E-01 |
| SAYS1    | 6   | 2                  | 4.16E-01 | 2                  | 4.16E-01 | 1                  | 1.00E+00 | 1                  | 1.00E+00 | 2                  | 4.72E-01 | 2                  | 4.72E-01 |
| MORN1    | 1   | 6                  | 2.13E-02 | 6                  | 2.13E-02 | 6                  | 4.72E-01 | 6                  | 4.72E-01 | 4                  | 1.00E+00 | 4                  | 1.00E+00 |
| DSCAML1  | 11  | 5                  | 1.03E-01 | 5                  | 1.03E-01 | 2                  | 6.12E-01 | 2                  | 6.12E-01 | 3                  | 4.72E-01 | 3                  | 4.72E-01 |
| OR6S1    | 14  | 5                  | 5.63E-01 | 6                  | 5.63E-01 | 3                  | 5.77E-01 | 4                  | 5.77E-01 | 4                  | 4.72E-01 | 5                  | 4.72E-01 |
| STX3     | 11  | 1                  | 7.46E-01 | 1                  | 7.46E-01 | 1                  | 4.72E-01 | 1                  | 4.72E-01 |                    |          |                    |          |
| KCNH3    | 12  | 1                  | 7.46E-01 | 1                  | 7.46E-01 | 1                  | 4.72E-01 | 1                  | 4.72E-01 |                    |          |                    |          |
| PEX2     | 8   | 2                  | 4.02E-01 | 2                  | 4.02E-01 | 1                  | 4.72E-01 | 1                  | 4.72E-01 | 1                  | 6.16E-01 | 1                  | 6.16E-01 |
| NELFE    | 6   | 2                  | 3.33E-01 | 2                  | 3.33E-01 | 1                  | 4.72E-01 | 1                  | 4.72E-01 | 1                  | 6.51E-01 | 1                  | 6.51E-01 |
| OGFOD3   | 17  | 1                  | 8.57E-01 | 1                  | 8.57E-01 | 1                  | 4.73E-01 | 1                  | 4.73E-01 | 1                  | 5.98E-01 | 1                  | 5.98E-01 |
| TMEM106A | 17  | 3                  | 7.79E-02 | 3                  | 7.79E-02 | 1                  | 4.91E-01 | 1                  | 4.91E-01 | 3                  | 4.73E-01 | 3                  | 4.73E-01 |
| ALPL     | 1   | 2                  | 3.73E-01 | 2                  | 3.73E-01 | 1                  | 4.73E-01 | 1                  | 4.73E-01 | 1                  | 6.44E-01 | 1                  | 6.44E-01 |
| PTPN1    | 20  | 1                  | 7.53E-01 | 1                  | 7.53E-01 | 1                  | 4.73E-01 | 1                  | 4.73E-01 |                    |          |                    |          |
| TRIM72   | 16  | 1                  | 4.08E-01 | 1                  | 4.08E-01 | 1                  | 4.73E-01 | 1                  | 4.73E-01 |                    |          |                    |          |
| HERC1    | 15  | 4                  | 4.13E-01 | 4                  | 4.13E-01 | 3                  | 4.73E-01 | 3                  | 4.73E-01 | 2                  | 1.00E+00 | 2                  | 1.00E+00 |
| WDR43    | 2   | 1                  | 8.84E-01 | 1                  | 8.84E-01 | 1                  | 4.73E-01 | 1                  | 4.73E-01 | 1                  | 6.52E-01 | 1                  | 6.52E-01 |
| CTDNBP1  | 17  | 1                  | 7.46E-01 | 1                  | 7.46E-01 | 1                  | 4.73E-01 | 1                  | 4.73E-01 |                    |          |                    |          |
| LMX1A    | 1   | 1                  | 7.46E-01 | 1                  | 7.46E-01 | 1                  | 4.73E-01 | 1                  | 4.73E-01 |                    |          |                    |          |
| FZD7     | 2   | 1                  | 7.49E-01 | 1                  | 7.49E-01 | 1                  | 4.73E-01 | 1                  | 4.73E-01 |                    |          |                    |          |
| PIEZO2   | 18  | 2                  | 5.02E-01 | 2                  | 5.02E-01 | 1                  | 4.73E-01 | 1                  | 4.73E-01 | 1                  | 6.17E-01 | 1                  | 6.17E-01 |
| SLC39A11 | 17  | 2                  | 4.96E-01 | 2                  | 4.96E-01 | 1                  | 4.73E-01 | 1                  | 4.73E-01 | 1                  | 6.65E-01 | 1                  | 6.65E-01 |
| LEPR     | 1   | 6                  | 6.42E-01 | 6                  | 6.42E-01 | 4                  | 4.73E-01 | 4                  | 4.73E-01 | 2                  | 6.36E-01 | 2                  | 6.36E-01 |
| SMG1     | 16  | 2                  | 3.20E-01 | 2                  | 3.20E-01 | 1                  | 4.73E-01 | 1                  | 4.73E-01 | 1                  | 6.51E-01 | 1                  | 6.51E-01 |
| FLAD1    | 1   | 4                  | 3.99E-02 | 4                  | 3.99E-02 | 1                  | 5.02E-01 | 1                  | 5.02E-01 | 3                  | 4.73E-01 | 3                  | 4.73E-01 |
| PTAR1    | 9   | 1                  | 7.45E-01 | 1                  | 7.45E-01 | 1                  | 4.73E-01 | 1                  | 4.73E-01 |                    |          |                    |          |
| GAPDHS   | 19  | 2                  | 3.93E-01 | 2                  | 3.93E-01 | 1                  | 4.73E-01 | 1                  | 4.73E-01 | 1                  | 6.28E-01 | 1                  | 6.28E-01 |
| LRRC10B  | 11  | 1                  | 7.45E-01 | 1                  | 7.45E-01 | 1                  | 4.73E-01 | 1                  | 4.73E-01 |                    |          |                    |          |
| TMEM55A  | 8   | 1                  | 7.45E-01 | 1                  | 7.45E-01 | 1                  | 4.73E-01 | 1                  | 4.73E-01 |                    |          |                    |          |
| CRP      | 1   | 3                  | 1.63E-01 | 3                  | 1.63E-01 | 3                  | 4.73E-01 | 3                  | 4.73E-01 |                    |          |                    |          |
| MUC17    | 7   | 12                 | 2.98E-01 | 13                 | 2.98E-01 | 8                  | 4.73E-01 | 9                  | 4.73E-01 | 8                  | 7.57E-01 | 9                  | 7.57E-01 |
| SNX24    | 5   | 1                  | 7.57E-01 | 1                  | 7.57E-01 | 1                  | 4.73E-01 | 1                  | 4.73E-01 |                    |          |                    |          |
| NKAIN4   | 20  | 1                  | 7.57E-01 | 1                  | 7.57E-01 | 1                  | 4.73E-01 | 1                  | 4.73E-01 |                    |          |                    |          |
| RALGDS   | 9   | 1                  | 7.11E-01 | 1                  | 7.11E-01 | 1                  | 4.73E-01 | 1                  | 4.73E-01 | 1                  | 5.99E-01 | 1                  | 5.99E-01 |
| ARHGAP23 | 17  | 1                  | 7.57E-01 | 1                  | 7.57E-01 | 1                  | 4.73E-01 | 1                  | 4.73E-01 |                    |          |                    |          |
| MBNL2    | 13  | 1                  | 7.57E-01 | 1                  | 7.57E-01 | 1                  | 4.73E-01 | 1                  | 4.73E-01 |                    |          |                    |          |
| RSF1     | 11  | 4                  | 6.59E-01 | 4                  | 6.59E-01 | 3                  | 8.01E-01 | 3                  | 8.01E-01 | 2                  | 4.73E-01 | 2                  | 4.73E-01 |
| PGLYRP4  | 1   | 1                  | 8.68E-01 | 1                  | 8.68E-01 | 1                  | 4.73E-01 | 1                  | 4.73E-01 | 1                  | 6.18E-01 | 1                  | 6.18E-01 |
| CYP4F3   | 19  | 4                  | 1.29E-01 | 4                  | 1.29E-01 | 4                  | 4.73E-01 | 4                  | 4.73E-01 |                    |          |                    |          |
| WDR19    | 4   | 5                  | 6.80E-01 | 5                  | 6.80E-01 | 3                  | 4.73E-01 | 3                  | 4.73E-01 | 3                  | 4.80E-01 | 3                  | 4.80E-01 |

| SetID         | Chr | ADEH- vs NA        |          |                    |          | ADEH+ vs ADEH-     |          |                    |          | ADEH+ vs NA        |          |                    |          |
|---------------|-----|--------------------|----------|--------------------|----------|--------------------|----------|--------------------|----------|--------------------|----------|--------------------|----------|
|               |     | rare novel         |          | all                |          | rare novel         |          | all                |          | rare novel         |          | all                |          |
|               |     | N variants in test | p-value  | N variants in test | p-value  | N variants in test | p-value  | N variants in test | p-value  | N variants in test | p-value  | N variants in test | p-value  |
| ITGAX         | 16  | 3                  | 2.39E-01 | 3                  | 2.39E-01 | 1                  | 4.74E-01 | 1                  | 4.74E-01 | 2                  | 6.33E-01 | 2                  | 6.33E-01 |
| TTC1          | 5   | 1                  | 7.47E-01 | 1                  | 7.47E-01 | 1                  | 4.74E-01 | 1                  | 4.74E-01 |                    |          |                    |          |
| LCT           | 2   | 1                  | 7.47E-01 | 1                  | 7.47E-01 | 1                  | 4.74E-01 | 1                  | 4.74E-01 |                    |          |                    |          |
| HSCB          | 22  | 1                  | 7.47E-01 | 1                  | 7.47E-01 | 1                  | 4.74E-01 | 1                  | 4.74E-01 |                    |          |                    |          |
| SLC28A2       | 15  | 2                  | 3.30E-01 | 2                  | 3.30E-01 | 1                  | 4.74E-01 | 1                  | 4.74E-01 | 1                  | 6.52E-01 | 1                  | 6.52E-01 |
| TM4SF1        | 3   | 2                  | 3.89E-01 | 2                  | 3.89E-01 | 1                  | 4.74E-01 | 1                  | 4.74E-01 | 1                  | 6.42E-01 | 1                  | 6.42E-01 |
| TTC29         | 4   | 2                  | 6.71E-03 | 2                  | 6.71E-03 |                    |          |                    |          | 2                  | 4.74E-01 | 2                  | 4.74E-01 |
| CILP2         | 19  | 4                  | 5.68E-01 | 4                  | 5.68E-01 | 4                  | 4.74E-01 | 4                  | 4.74E-01 | 1                  | 6.06E-01 | 1                  | 6.06E-01 |
| HRC           | 19  | 2                  | 7.10E-01 | 2                  | 7.10E-01 | 2                  | 4.76E-01 | 2                  | 4.76E-01 | 2                  | 4.74E-01 | 2                  | 4.74E-01 |
| WDR81         | 17  | 5                  | 7.94E-02 | 5                  | 7.94E-02 | 4                  | 1.00E+00 | 4                  | 1.00E+00 | 2                  | 4.74E-01 | 2                  | 4.74E-01 |
| VNN1          | 6   | 1                  | 7.60E-01 | 2                  | 7.68E-01 | 1                  | 5.39E-01 | 2                  | 5.42E-01 |                    |          | 1                  | 4.74E-01 |
| SLFN14        | 17  | 5                  | 7.07E-01 | 5                  | 7.07E-01 | 4                  | 4.74E-01 | 4                  | 4.74E-01 | 1                  | 6.42E-01 | 1                  | 6.42E-01 |
| ZNF683        | 1   | 3                  | 1.37E-01 | 4                  | 1.37E-01 | 1                  | 4.74E-01 | 2                  | 4.87E-01 | 2                  | 6.52E-01 | 3                  | 6.57E-01 |
| IRX4          | 5   | 1                  | 7.56E-01 | 1                  | 7.56E-01 | 1                  | 4.74E-01 | 1                  | 4.74E-01 |                    |          |                    |          |
| HIPK4         | 19  | 2                  | 3.64E-01 | 2                  | 3.64E-01 | 1                  | 4.74E-01 | 1                  | 4.74E-01 | 1                  | 6.28E-01 | 1                  | 6.28E-01 |
| LYNX1         | 8   | 2                  | 4.62E-01 | 2                  | 4.62E-01 | 1                  | 4.74E-01 | 1                  | 4.74E-01 | 1                  | 6.31E-01 | 1                  | 6.31E-01 |
| C7orf55-LUC7L | 7   | 2                  | 3.68E-01 | 2                  | 3.68E-01 | 1                  | 4.74E-01 | 1                  | 4.74E-01 | 1                  | 6.01E-01 | 1                  | 6.01E-01 |
| LUC7L2        | 7   | 1                  | 7.57E-01 | 1                  | 7.57E-01 | 1                  | 4.74E-01 | 1                  | 4.74E-01 |                    |          |                    |          |
| TCF19         | 6   | 1                  | 7.57E-01 | 1                  | 7.57E-01 | 1                  | 4.74E-01 | 1                  | 4.74E-01 |                    |          |                    |          |
| CAMK2D        | 4   | 1                  | 7.57E-01 | 1                  | 7.57E-01 | 1                  | 4.74E-01 | 1                  | 4.74E-01 |                    |          |                    |          |
| RBPJL         | 20  | 1                  | 7.57E-01 | 1                  | 7.57E-01 | 1                  | 4.74E-01 | 1                  | 4.74E-01 |                    |          |                    |          |
| AK4           | 1   | 1                  | 7.57E-01 | 1                  | 7.57E-01 | 1                  | 4.74E-01 | 1                  | 4.74E-01 |                    |          |                    |          |
| UBOX5         | 20  | 1                  | 7.57E-01 | 1                  | 7.57E-01 | 1                  | 4.74E-01 | 1                  | 4.74E-01 |                    |          |                    |          |
| VPS8          | 3   | 1                  | 7.57E-01 | 1                  | 7.57E-01 | 1                  | 4.74E-01 | 1                  | 4.74E-01 |                    |          |                    |          |
| GPD2          | 2   | 1                  | 8.82E-01 | 1                  | 8.82E-01 | 1                  | 4.74E-01 | 1                  | 4.74E-01 | 1                  | 6.50E-01 | 1                  | 6.50E-01 |
| FBRS          | 16  | 1                  | 7.27E-01 | 1                  | 7.27E-01 | 1                  | 4.74E-01 | 1                  | 4.74E-01 |                    |          |                    |          |
| MAP2K5        | 15  | 2                  | 4.13E-01 | 2                  | 4.13E-01 | 1                  | 4.74E-01 | 1                  | 4.74E-01 | 1                  | 6.44E-01 | 1                  | 6.44E-01 |
| CLEC2A        | 12  | 3                  | 1.62E-01 | 3                  | 1.62E-01 | 1                  | 4.74E-01 | 1                  | 4.74E-01 | 2                  | 6.40E-01 | 2                  | 6.40E-01 |
| RAD18         | 3   | 1                  | 6.69E-01 | 1                  | 6.69E-01 | 1                  | 4.74E-01 | 1                  | 4.74E-01 | 1                  | 6.12E-01 | 1                  | 6.12E-01 |
| ZNF454        | 5   | 1                  | 7.27E-01 | 1                  | 7.27E-01 | 1                  | 4.74E-01 | 1                  | 4.74E-01 |                    |          |                    |          |
| ELK3          | 12  | 1                  | 6.35E-01 | 1                  | 6.35E-01 | 1                  | 4.74E-01 | 1                  | 4.74E-01 | 1                  | 6.10E-01 | 1                  | 6.10E-01 |
| PFDN2         | 1   | 1                  | 7.27E-01 | 1                  | 7.27E-01 | 1                  | 4.74E-01 | 1                  | 4.74E-01 |                    |          |                    |          |
| TSSC1         | 2   | 1                  | 7.27E-01 | 1                  | 7.27E-01 | 1                  | 4.74E-01 | 1                  | 4.74E-01 |                    |          |                    |          |
| URB1          | 21  | 12                 | 1.63E-01 | 12                 | 1.63E-01 | 8                  | 1.00E+00 | 8                  | 1.00E+00 | 7                  | 4.74E-01 | 7                  | 4.74E-01 |
| PSORS1C2      | 6   | 2                  | 7.22E-01 | 2                  | 7.22E-01 | 1                  | 1.00E+00 | 1                  | 1.00E+00 | 2                  | 4.74E-01 | 2                  | 4.74E-01 |
| CAPNS1        | 19  | 2                  | 4.07E-01 | 2                  | 4.07E-01 | 1                  | 4.74E-01 | 1                  | 4.74E-01 | 1                  | 6.38E-01 | 1                  | 6.38E-01 |
| OR2B6         | 6   | 1                  | 7.49E-01 | 1                  | 7.49E-01 | 1                  | 4.74E-01 | 1                  | 4.74E-01 |                    |          |                    |          |
| GFPT2         | 5   | 2                  | 4.31E-01 | 2                  | 4.31E-01 | 1                  | 4.74E-01 | 1                  | 4.74E-01 | 1                  | 6.33E-01 | 1                  | 6.33E-01 |
| ANKIB1        | 7   | 1                  | 7.43E-01 | 1                  | 7.43E-01 | 1                  | 4.74E-01 | 1                  | 4.74E-01 |                    |          |                    |          |
| TPP2          | 13  | 2                  | 1.26E-01 | 2                  | 1.26E-01 | 1                  | 4.74E-01 | 1                  | 4.74E-01 | 2                  | 5.81E-01 | 2                  | 5.81E-01 |
| RNFT2         | 12  | 1                  | 7.43E-01 | 1                  | 7.43E-01 | 1                  | 4.74E-01 | 1                  | 4.74E-01 |                    |          |                    |          |
| EPSTI1        | 13  |                    |          | 1                  | 7.68E-01 |                    |          | 1                  | 4.74E-01 |                    |          | 1                  | 5.57E-01 |
| MPP2          | 17  | 1                  | 8.34E-01 | 1                  | 8.34E-01 | 1                  | 4.74E-01 | 1                  | 4.74E-01 | 1                  | 6.17E-01 | 1                  | 6.17E-01 |
| TMPRSS11D     | 4   | 4                  | 3.92E-02 | 4                  | 3.92E-02 | 2                  | 5.80E-01 | 2                  | 5.80E-01 | 2                  | 4.74E-01 | 2                  | 4.74E-01 |
| GRAMD1C       | 3   | 1                  | 7.46E-01 | 1                  | 7.46E-01 | 1                  | 4.74E-01 | 1                  | 4.74E-01 |                    |          |                    |          |
| KBTBD3        | 11  | 1                  | 7.46E-01 | 1                  | 7.46E-01 | 1                  | 4.74E-01 | 1                  | 4.74E-01 |                    |          |                    |          |
| ANKRD23       | 2   | 3                  | 1.75E-01 | 3                  | 1.75E-01 | 1                  | 4.74E-01 | 1                  | 4.74E-01 | 2                  | 6.51E-01 | 2                  | 6.51E-01 |
| ABCF1         | 6   | 1                  | 7.46E-01 | 1                  | 7.46E-01 | 1                  | 4.74E-01 | 1                  | 4.74E-01 |                    |          |                    |          |

| SetID       | Chr | ADEH- vs NA        |          |                    |          | ADEH+ vs ADEH-     |          |                    |          | ADEH+ vs NA        |          |                    |          |
|-------------|-----|--------------------|----------|--------------------|----------|--------------------|----------|--------------------|----------|--------------------|----------|--------------------|----------|
|             |     | rare novel         |          | all                |          | rare novel         |          | all                |          | rare novel         |          | all                |          |
|             |     | N variants in test | p-value  | N variants in test | p-value  | N variants in test | p-value  | N variants in test | p-value  | N variants in test | p-value  | N variants in test | p-value  |
| C5orf30     | 5   | 1                  | 7.46E-01 | 1                  | 7.46E-01 | 1                  | 4.74E-01 | 1                  | 4.74E-01 |                    |          |                    |          |
| KDM2A       | 11  | 1                  | 7.46E-01 | 1                  | 7.46E-01 | 1                  | 4.74E-01 | 1                  | 4.74E-01 |                    |          |                    |          |
| RAD21L1     | 20  | 3                  | 1.46E-01 | 3                  | 1.46E-01 | 1                  | 4.75E-01 | 1                  | 4.75E-01 | 2                  | 6.21E-01 | 2                  | 6.21E-01 |
| TCL1B       | 14  | 1                  | 7.39E-01 | 1                  | 7.39E-01 | 1                  | 4.75E-01 | 1                  | 4.75E-01 |                    |          |                    |          |
| DLL4        | 15  | 1                  | 7.39E-01 | 1                  | 7.39E-01 | 1                  | 4.75E-01 | 1                  | 4.75E-01 |                    |          |                    |          |
| DNAJC28     | 21  | 2                  | 5.36E-01 | 2                  | 5.36E-01 | 1                  | 4.75E-01 | 1                  | 4.75E-01 | 1                  | 6.41E-01 | 1                  | 6.41E-01 |
| TESC        | 12  | 1                  | 7.39E-01 | 1                  | 7.39E-01 | 1                  | 4.75E-01 | 1                  | 4.75E-01 |                    |          |                    |          |
| CCDC170     | 6   | 3                  | 6.55E-01 | 3                  | 6.55E-01 | 2                  | 1.00E+00 | 2                  | 1.00E+00 | 2                  | 4.75E-01 | 2                  | 4.75E-01 |
| ARMC5       | 16  | 2                  | 6.55E-01 | 2                  | 6.55E-01 | 1                  | 4.75E-01 | 1                  | 4.75E-01 | 2                  | 6.41E-01 | 2                  | 6.41E-01 |
| DPY19L4     | 8   | 4                  | 3.43E-01 | 4                  | 3.43E-01 | 3                  | 7.76E-01 | 3                  | 7.76E-01 | 2                  | 4.75E-01 | 2                  | 4.75E-01 |
| IGFBP5      | 2   | 1                  | 8.64E-01 | 1                  | 8.64E-01 | 1                  | 4.75E-01 | 1                  | 4.75E-01 | 1                  | 6.85E-01 | 1                  | 6.85E-01 |
| CST5        | 20  | 3                  | 7.71E-01 | 3                  | 7.71E-01 | 3                  | 5.75E-01 | 3                  | 5.75E-01 | 2                  | 4.75E-01 | 2                  | 4.75E-01 |
| THAP8       | 19  | 4                  | 7.15E-01 | 4                  | 7.15E-01 | 3                  | 4.75E-01 | 3                  | 4.75E-01 | 4                  | 5.32E-01 | 4                  | 5.32E-01 |
| GOLGA5      | 14  | 2                  | 6.12E-01 | 2                  | 6.12E-01 | 2                  | 1.00E+00 | 2                  | 1.00E+00 | 2                  | 4.75E-01 | 2                  | 4.75E-01 |
| DUSP27      | 1   | 10                 | 7.06E-01 | 10                 | 7.06E-01 | 7                  | 5.93E-01 | 7                  | 5.93E-01 | 7                  | 4.75E-01 | 7                  | 4.75E-01 |
| PIK3CA      | 3   | 1                  | 7.44E-01 | 1                  | 7.44E-01 | 1                  | 4.75E-01 | 1                  | 4.75E-01 |                    |          |                    |          |
| CD2BP2      | 16  | 3                  | 1.78E-01 | 3                  | 1.78E-01 | 1                  | 4.75E-01 | 1                  | 4.75E-01 | 2                  | 6.25E-01 | 2                  | 6.25E-01 |
| CCL25       | 19  | 1                  | 7.44E-01 | 1                  | 7.44E-01 | 1                  | 4.75E-01 | 1                  | 4.75E-01 |                    |          |                    |          |
| PLEKHA1     | 10  | 1                  | 7.44E-01 | 1                  | 7.44E-01 | 1                  | 4.75E-01 | 1                  | 4.75E-01 |                    |          |                    |          |
| C12orf73    | 12  | 1                  | 6.71E-01 | 1                  | 6.71E-01 | 1                  | 4.75E-01 | 1                  | 4.75E-01 | 1                  | 6.30E-01 | 1                  | 6.30E-01 |
| SPRR1A      | 1   | 1                  | 7.44E-01 | 1                  | 7.44E-01 | 1                  | 4.75E-01 | 1                  | 4.75E-01 |                    |          |                    |          |
| ZNF791      | 19  | 1                  | 7.44E-01 | 1                  | 7.44E-01 | 1                  | 4.75E-01 | 1                  | 4.75E-01 |                    |          |                    |          |
| FOXN2       | 2   | 2                  | 3.59E-01 | 2                  | 3.59E-01 | 1                  | 4.75E-01 | 1                  | 4.75E-01 | 1                  | 6.65E-01 | 1                  | 6.65E-01 |
| FLVCR1      | 1   | 2                  | 3.81E-01 | 2                  | 3.81E-01 | 1                  | 4.75E-01 | 1                  | 4.75E-01 | 1                  | 6.30E-01 | 1                  | 6.30E-01 |
| POLE2       | 14  | 4                  | 5.40E-01 | 4                  | 5.40E-01 | 3                  | 7.29E-01 | 3                  | 7.29E-01 | 3                  | 4.75E-01 | 3                  | 4.75E-01 |
| BTNL3       | 5   | 1                  | 7.42E-01 | 1                  | 7.42E-01 | 1                  | 4.75E-01 | 1                  | 4.75E-01 |                    |          |                    |          |
| MFF         | 2   | 3                  | 1.30E-01 | 3                  | 1.30E-01 | 1                  | 4.75E-01 | 1                  | 4.75E-01 | 2                  | 6.39E-01 | 2                  | 6.39E-01 |
| THBS1       | 15  | 3                  | 1.47E-01 | 4                  | 1.51E-01 | 1                  | 4.75E-01 | 2                  | 4.95E-01 | 2                  | 6.42E-01 | 3                  | 8.74E-01 |
| CCDC36      | 3   | 1                  | 7.42E-01 | 1                  | 7.42E-01 | 1                  | 4.75E-01 | 1                  | 4.75E-01 |                    |          |                    |          |
| HCST        | 19  | 1                  | 7.42E-01 | 1                  | 7.42E-01 | 1                  | 4.75E-01 | 1                  | 4.75E-01 |                    |          |                    |          |
| LIMS1       | 2   | 1                  | 6.48E-01 | 1                  | 6.48E-01 | 1                  | 4.75E-01 | 1                  | 4.75E-01 | 1                  | 6.59E-01 | 1                  | 6.59E-01 |
| MVB12B      | 9   | 1                  | 7.42E-01 | 1                  | 7.42E-01 | 1                  | 4.75E-01 | 1                  | 4.75E-01 |                    |          |                    |          |
| VWA9        | 15  | 1                  | 7.42E-01 | 1                  | 7.42E-01 | 1                  | 4.75E-01 | 1                  | 4.75E-01 |                    |          |                    |          |
| FAM114A2    | 5   | 3                  | 1.04E-01 | 3                  | 1.04E-01 | 1                  | 4.75E-01 | 1                  | 4.75E-01 | 2                  | 6.37E-01 | 2                  | 6.37E-01 |
| FAM227A     | 22  | 1                  | 7.44E-01 | 1                  | 7.44E-01 | 1                  | 4.75E-01 | 1                  | 4.75E-01 |                    |          |                    |          |
| SULT6B1     | 2   | 1                  | 7.44E-01 | 1                  | 7.44E-01 | 1                  | 4.75E-01 | 1                  | 4.75E-01 |                    |          |                    |          |
| SLC39A1     | 1   | 2                  | 4.22E-01 | 2                  | 4.22E-01 | 1                  | 4.75E-01 | 1                  | 4.75E-01 | 1                  | 6.44E-01 | 1                  | 6.44E-01 |
| HOXD11      | 2   | 1                  | 7.44E-01 | 1                  | 7.44E-01 | 1                  | 4.75E-01 | 1                  | 4.75E-01 |                    |          |                    |          |
| CNTNAP1     | 17  | 1                  | 7.44E-01 | 1                  | 7.44E-01 | 1                  | 4.75E-01 | 1                  | 4.75E-01 |                    |          |                    |          |
| GSDMA       | 17  | 1                  | 7.44E-01 | 1                  | 7.44E-01 | 1                  | 4.75E-01 | 1                  | 4.75E-01 |                    |          |                    |          |
| ING4        | 12  | 1                  | 7.44E-01 | 1                  | 7.44E-01 | 1                  | 4.75E-01 | 1                  | 4.75E-01 |                    |          |                    |          |
| TMEFF1      | 9   | 2                  | 5.15E-01 | 2                  | 5.15E-01 | 1                  | 4.75E-01 | 1                  | 4.75E-01 | 1                  | 6.12E-01 | 1                  | 6.12E-01 |
| MSANTD3-TMI | 9   | 2                  | 5.15E-01 | 2                  | 5.15E-01 | 1                  | 4.75E-01 | 1                  | 4.75E-01 | 1                  | 6.12E-01 | 1                  | 6.12E-01 |
| KRTAP10-12  | 21  | 1                  | 7.48E-01 | 1                  | 7.48E-01 | 1                  | 4.75E-01 | 1                  | 4.75E-01 |                    |          |                    |          |
| PCP4L1      | 1   | 1                  | 7.48E-01 | 1                  | 7.48E-01 | 1                  | 4.75E-01 | 1                  | 4.75E-01 |                    |          |                    |          |
| DBP         | 19  | 1                  | 7.48E-01 | 1                  | 7.48E-01 | 1                  | 4.75E-01 | 1                  | 4.75E-01 |                    |          |                    |          |
| SLC8A1      | 2   | 1                  | 7.48E-01 | 1                  | 7.48E-01 | 1                  | 4.75E-01 | 1                  | 4.75E-01 |                    |          |                    |          |
| XPR1        | 1   | 2                  | 3.55E-01 | 2                  | 3.55E-01 | 1                  | 4.75E-01 | 1                  | 4.75E-01 | 1                  | 6.10E-01 | 1                  | 6.10E-01 |



| SetID     | Chr | ADEH- vs NA        |          |                    |          | ADEH+ vs ADEH-     |          |                    |          | ADEH+ vs NA        |          |                    |          |
|-----------|-----|--------------------|----------|--------------------|----------|--------------------|----------|--------------------|----------|--------------------|----------|--------------------|----------|
|           |     | rare novel         |          | all                |          | rare novel         |          | all                |          | rare novel         |          | all                |          |
|           |     | N variants in test | p-value  | N variants in test | p-value  | N variants in test | p-value  | N variants in test | p-value  | N variants in test | p-value  | N variants in test | p-value  |
| TCTE3     | 6   | 1                  | 7.48E-01 | 1                  | 7.48E-01 | 1                  | 4.75E-01 | 1                  | 4.75E-01 |                    |          |                    |          |
| TMEM234   | 1   | 1                  | 6.84E-01 | 1                  | 6.84E-01 | 1                  | 4.75E-01 | 1                  | 4.75E-01 | 1                  | 6.41E-01 | 1                  | 6.41E-01 |
| MRPL15    | 8   | 1                  | 7.46E-01 | 1                  | 7.46E-01 | 1                  | 4.75E-01 | 1                  | 4.75E-01 |                    |          |                    |          |
| CMSS1     | 3   | 1                  | 7.46E-01 | 1                  | 7.46E-01 | 1                  | 4.75E-01 | 1                  | 4.75E-01 |                    |          |                    |          |
| CA3       | 8   | 1                  | 7.46E-01 | 1                  | 7.46E-01 | 1                  | 4.75E-01 | 1                  | 4.75E-01 |                    |          |                    |          |
| DLD       | 7   | 2                  | 3.66E-02 | 2                  | 3.66E-02 | 1                  | 4.94E-01 | 1                  | 4.94E-01 | 1                  | 4.75E-01 | 1                  | 4.75E-01 |
| PRR22     | 19  | 2                  | 7.62E-01 | 3                  | 7.02E-01 | 2                  | 5.73E-01 | 3                  | 4.76E-01 | 1                  | 6.17E-01 | 2                  | 6.85E-01 |
| DSCR3     | 21  | 4                  | 1.09E-01 | 4                  | 1.09E-01 | 4                  | 4.76E-01 | 4                  | 4.76E-01 |                    |          |                    |          |
| C11orf80  | 11  | 1                  | 7.43E-01 | 1                  | 7.43E-01 | 1                  | 4.76E-01 | 1                  | 4.76E-01 |                    |          |                    |          |
| BCAS4     | 20  | 1                  | 7.43E-01 | 1                  | 7.43E-01 | 1                  | 4.76E-01 | 1                  | 4.76E-01 |                    |          |                    |          |
| CEP41     | 7   | 2                  | 3.77E-01 | 2                  | 3.77E-01 | 1                  | 4.76E-01 | 1                  | 4.76E-01 | 1                  | 6.68E-01 | 1                  | 6.68E-01 |
| CCDC30    | 1   | 3                  | 7.15E-02 | 3                  | 7.15E-02 | 1                  | 4.76E-01 | 1                  | 4.76E-01 | 3                  | 5.05E-01 | 3                  | 5.05E-01 |
| SLC22A4   | 5   | 1                  | 7.51E-01 | 1                  | 7.51E-01 | 1                  | 4.76E-01 | 1                  | 4.76E-01 |                    |          |                    |          |
| RORA      | 15  | 1                  | 7.51E-01 | 1                  | 7.51E-01 | 1                  | 4.76E-01 | 1                  | 4.76E-01 |                    |          |                    |          |
| TBC1D17   | 19  | 4                  | 1.43E-01 | 4                  | 1.43E-01 | 4                  | 4.76E-01 | 4                  | 4.76E-01 |                    |          |                    |          |
| GTPBP1    | 22  | 1                  | 4.12E-01 | 1                  | 4.12E-01 | 1                  | 4.76E-01 | 1                  | 4.76E-01 |                    |          |                    |          |
| LRRC25    | 19  | 1                  | 6.03E-01 | 1                  | 6.03E-01 | 1                  | 1.00E+00 | 1                  | 1.00E+00 | 1                  | 4.76E-01 | 1                  | 4.76E-01 |
| CROT      | 7   | 7                  | 8.12E-02 | 7                  | 8.12E-02 | 5                  | 5.31E-01 | 5                  | 5.31E-01 | 2                  | 4.76E-01 | 2                  | 4.76E-01 |
| CCDC88A   | 2   | 5                  | 1.39E-01 | 5                  | 1.39E-01 | 5                  | 4.77E-01 | 5                  | 4.77E-01 |                    |          |                    |          |
| IGSF10    | 3   | 14                 | 2.48E-01 | 14                 | 2.48E-01 | 10                 | 6.71E-01 | 10                 | 6.71E-01 | 8                  | 4.77E-01 | 8                  | 4.77E-01 |
| WDR72     | 15  | 2                  | 4.87E-01 | 3                  | 4.88E-01 | 1                  | 4.77E-01 | 2                  | 4.92E-01 | 1                  | 6.65E-01 | 2                  | 6.79E-01 |
| ARRDC5    | 19  | 1                  | 7.53E-01 | 1                  | 7.53E-01 | 1                  | 4.77E-01 | 1                  | 4.77E-01 |                    |          |                    |          |
| GCH1      | 14  | 1                  | 7.26E-01 | 1                  | 7.26E-01 | 1                  | 4.77E-01 | 1                  | 4.77E-01 | 1                  | 6.17E-01 | 1                  | 6.17E-01 |
| NUDCD1    | 8   | 1                  | 7.53E-01 | 1                  | 7.53E-01 | 1                  | 4.77E-01 | 1                  | 4.77E-01 |                    |          |                    |          |
| ITPKB     | 1   | 1                  | 7.53E-01 | 1                  | 7.53E-01 | 1                  | 4.77E-01 | 1                  | 4.77E-01 |                    |          |                    |          |
| LIN54     | 4   | 1                  | 7.53E-01 | 1                  | 7.53E-01 | 1                  | 4.77E-01 | 1                  | 4.77E-01 |                    |          |                    |          |
| RAB18     | 10  | 1                  | 7.53E-01 | 1                  | 7.53E-01 | 1                  | 4.77E-01 | 1                  | 4.77E-01 |                    |          |                    |          |
| SMAD9     | 13  | 3                  | 1.57E-01 | 3                  | 1.57E-01 | 3                  | 4.77E-01 | 3                  | 4.77E-01 |                    |          |                    |          |
| ADAMTSL4  | 1   | 7                  | 7.89E-01 | 7                  | 7.89E-01 | 5                  | 5.28E-01 | 5                  | 5.28E-01 | 3                  | 4.77E-01 | 3                  | 4.77E-01 |
| ENPP6     | 4   | 4                  | 5.28E-01 | 4                  | 5.28E-01 | 2                  | 7.50E-01 | 2                  | 7.50E-01 | 3                  | 4.77E-01 | 3                  | 4.77E-01 |
| RYR3      | 15  | 12                 | 3.46E-01 | 12                 | 3.46E-01 | 9                  | 4.77E-01 | 9                  | 4.77E-01 | 5                  | 8.50E-01 | 5                  | 8.50E-01 |
| LRRFIP2   | 3   | 4                  | 3.20E-02 | 4                  | 3.20E-02 | 2                  | 6.06E-01 | 2                  | 6.06E-01 | 2                  | 4.77E-01 | 2                  | 4.77E-01 |
| ZMYM2     | 13  | 2                  | 4.79E-01 | 2                  | 4.79E-01 | 1                  | 5.41E-01 | 1                  | 5.41E-01 | 2                  | 4.78E-01 | 2                  | 4.78E-01 |
| SSH3      | 11  | 3                  | 1.61E-01 | 3                  | 1.61E-01 | 3                  | 4.78E-01 | 3                  | 4.78E-01 |                    |          |                    |          |
| C20orf196 | 20  | 1                  | 3.77E-01 | 1                  | 3.77E-01 | 1                  | 4.78E-01 | 1                  | 4.78E-01 |                    |          |                    |          |
| PCDHA6    | 5   | 3                  | 7.04E-01 | 3                  | 7.04E-01 | 2                  | 5.28E-01 | 2                  | 5.28E-01 | 2                  | 4.78E-01 | 2                  | 4.78E-01 |
| PCDHA7    | 5   | 3                  | 7.04E-01 | 3                  | 7.04E-01 | 2                  | 5.28E-01 | 2                  | 5.28E-01 | 2                  | 4.78E-01 | 2                  | 4.78E-01 |
| PCDHA8    | 5   | 3                  | 7.04E-01 | 3                  | 7.04E-01 | 2                  | 5.28E-01 | 2                  | 5.28E-01 | 2                  | 4.78E-01 | 2                  | 4.78E-01 |
| PCDHA9    | 5   | 3                  | 7.04E-01 | 3                  | 7.04E-01 | 2                  | 5.28E-01 | 2                  | 5.28E-01 | 2                  | 4.78E-01 | 2                  | 4.78E-01 |
| PCDHAC2   | 5   | 4                  | 8.26E-01 | 4                  | 8.26E-01 | 3                  | 4.94E-01 | 3                  | 4.94E-01 | 2                  | 4.78E-01 | 2                  | 4.78E-01 |
| SEC24B    | 4   | 5                  | 3.63E-01 | 5                  | 3.63E-01 | 4                  | 5.11E-01 | 4                  | 5.11E-01 | 2                  | 4.78E-01 | 2                  | 4.78E-01 |
| SUMF1     | 3   | 1                  | 5.65E-01 | 1                  | 5.65E-01 | 1                  | 4.78E-01 | 1                  | 4.78E-01 | 1                  | 5.77E-01 | 1                  | 5.77E-01 |
| LANCL1    | 2   | 4                  | 6.24E-01 | 4                  | 6.24E-01 | 4                  | 5.89E-01 | 4                  | 5.89E-01 | 2                  | 4.78E-01 | 2                  | 4.78E-01 |
| VLDLR     | 9   | 3                  | 1.61E-01 | 3                  | 1.61E-01 | 3                  | 4.78E-01 | 3                  | 4.78E-01 |                    |          |                    |          |
| DDX58     | 9   | 6                  | 4.12E-01 | 6                  | 4.12E-01 | 6                  | 4.78E-01 | 6                  | 4.78E-01 | 4                  | 6.00E-01 | 4                  | 6.00E-01 |
| SLC4A1    | 17  | 4                  | 5.30E-01 | 4                  | 5.30E-01 | 4                  | 4.78E-01 | 4                  | 4.78E-01 | 1                  | 5.88E-01 | 1                  | 5.88E-01 |
| TFEC      | 7   | 1                  | 7.44E-01 | 1                  | 7.44E-01 | 1                  | 4.78E-01 | 1                  | 4.78E-01 |                    |          |                    |          |
| VEZT      | 12  | 3                  | 6.94E-02 | 3                  | 6.94E-02 | 1                  | 4.78E-01 | 1                  | 4.78E-01 | 3                  | 4.88E-01 | 3                  | 4.88E-01 |

| SetID     | Chr | ADEH- vs NA        |          |                    |          | ADEH+ vs ADEH-     |          |                    |          | ADEH+ vs NA        |          |                    |          |
|-----------|-----|--------------------|----------|--------------------|----------|--------------------|----------|--------------------|----------|--------------------|----------|--------------------|----------|
|           |     | rare novel         |          | all                |          | rare novel         |          | all                |          | rare novel         |          | all                |          |
|           |     | N variants in test | p-value  | N variants in test | p-value  | N variants in test | p-value  | N variants in test | p-value  | N variants in test | p-value  | N variants in test | p-value  |
| SLC27A4   | 9   | 1                  | 7.44E-01 | 1                  | 7.44E-01 | 1                  | 4.78E-01 | 1                  | 4.78E-01 |                    |          |                    |          |
| CDH4      | 20  | 2                  | 4.04E-01 | 2                  | 4.04E-01 | 1                  | 4.78E-01 | 1                  | 4.78E-01 | 1                  | 6.16E-01 | 1                  | 6.16E-01 |
| CCDC102B  | 18  | 1                  | 7.44E-01 | 1                  | 7.44E-01 | 1                  | 4.78E-01 | 1                  | 4.78E-01 |                    |          |                    |          |
| PREB      | 2   | 1                  | 7.02E-01 | 1                  | 7.02E-01 | 1                  | 4.78E-01 | 1                  | 4.78E-01 | 1                  | 6.35E-01 | 1                  | 6.35E-01 |
| RARB      | 3   | 1                  | 7.44E-01 | 1                  | 7.44E-01 | 1                  | 4.78E-01 | 1                  | 4.78E-01 |                    |          |                    |          |
| NBR1      | 17  | 4                  | 8.10E-01 | 4                  | 8.10E-01 | 4                  | 7.27E-01 | 4                  | 7.27E-01 | 2                  | 4.78E-01 | 2                  | 4.78E-01 |
| RFTN1     | 3   | 1                  | 7.51E-01 | 1                  | 7.51E-01 | 1                  | 4.78E-01 | 1                  | 4.78E-01 |                    |          |                    |          |
| VAPB      | 20  | 1                  | 7.51E-01 | 1                  | 7.51E-01 | 1                  | 4.78E-01 | 1                  | 4.78E-01 |                    |          |                    |          |
| LBH       | 2   | 1                  | 7.51E-01 | 1                  | 7.51E-01 | 1                  | 4.78E-01 | 1                  | 4.78E-01 |                    |          |                    |          |
| C10orf105 | 10  | 1                  | 7.51E-01 | 1                  | 7.51E-01 | 1                  | 4.78E-01 | 1                  | 4.78E-01 |                    |          |                    |          |
| YME1L1    | 10  | 1                  | 7.51E-01 | 1                  | 7.51E-01 | 1                  | 4.78E-01 | 1                  | 4.78E-01 |                    |          |                    |          |
| CABIN1    | 22  | 8                  | 5.98E-01 | 8                  | 5.98E-01 | 9                  | 5.64E-01 | 9                  | 5.64E-01 | 4                  | 4.78E-01 | 4                  | 4.78E-01 |
| LENG1     | 19  | 1                  | 7.58E-01 | 1                  | 7.58E-01 | 1                  | 4.78E-01 | 1                  | 4.78E-01 |                    |          |                    |          |
| LRRC58    | 3   | 1                  | 7.58E-01 | 1                  | 7.58E-01 | 1                  | 4.78E-01 | 1                  | 4.78E-01 |                    |          |                    |          |
| EDC3      | 15  | 1                  | 7.58E-01 | 1                  | 7.58E-01 | 1                  | 4.78E-01 | 1                  | 4.78E-01 |                    |          |                    |          |
| PDE12     | 3   | 1                  | 7.58E-01 | 1                  | 7.58E-01 | 1                  | 4.78E-01 | 1                  | 4.78E-01 |                    |          |                    |          |
| SLC16A9   | 10  | 1                  | 7.58E-01 | 1                  | 7.58E-01 | 1                  | 4.78E-01 | 1                  | 4.78E-01 |                    |          |                    |          |
| NEK9      | 14  | 1                  | 7.58E-01 | 1                  | 7.58E-01 | 1                  | 4.78E-01 | 1                  | 4.78E-01 |                    |          |                    |          |
| PTPN3     | 9   | 6                  | 5.67E-01 | 6                  | 5.67E-01 | 5                  | 4.78E-01 | 5                  | 4.78E-01 | 1                  | 6.13E-01 | 1                  | 6.13E-01 |
| SAMD9     | 7   | 3                  | 2.67E-01 | 4                  | 3.24E-01 | 2                  | 4.78E-01 | 3                  | 6.57E-01 | 2                  | 4.81E-01 | 3                  | 4.83E-01 |
| SPACA1    | 6   | 4                  | 3.06E-02 | 4                  | 3.06E-02 | 1                  | 4.88E-01 | 1                  | 4.88E-01 | 3                  | 4.79E-01 | 3                  | 4.79E-01 |
| NCOR2     | 12  | 13                 | 3.76E-01 | 13                 | 3.76E-01 | 12                 | 5.19E-01 | 12                 | 5.19E-01 | 4                  | 4.79E-01 | 4                  | 4.79E-01 |
| CR2       | 1   | 6                  | 8.99E-01 | 6                  | 8.99E-01 | 5                  | 4.79E-01 | 5                  | 4.79E-01 | 2                  | 6.45E-01 | 2                  | 6.45E-01 |
| PLA1A     | 3   | 3                  | 4.15E-02 | 3                  | 4.15E-02 | 2                  | 6.32E-01 | 2                  | 6.32E-01 | 1                  | 4.79E-01 | 1                  | 4.79E-01 |
| SERPINA6  | 14  | 2                  | 1.22E-01 | 2                  | 1.22E-01 | 2                  | 4.79E-01 | 2                  | 4.79E-01 |                    |          |                    |          |
| PCDH9     | 13  | 4                  | 2.51E-02 | 4                  | 2.51E-02 | 2                  | 5.86E-01 | 2                  | 5.86E-01 | 2                  | 4.79E-01 | 2                  | 4.79E-01 |
| CCDC183   | 9   | 3                  | 2.36E-01 | 3                  | 2.36E-01 | 2                  | 6.23E-01 | 2                  | 6.23E-01 | 2                  | 4.79E-01 | 2                  | 4.79E-01 |
| DHX29     | 5   | 6                  | 6.87E-01 | 6                  | 6.87E-01 | 4                  | 4.79E-01 | 4                  | 4.79E-01 | 3                  | 5.18E-01 | 3                  | 5.18E-01 |
| F2        | 11  | 1                  | 7.56E-01 | 1                  | 7.56E-01 | 1                  | 4.79E-01 | 1                  | 4.79E-01 |                    |          |                    |          |
| FABP2     | 4   | 1                  | 7.56E-01 | 1                  | 7.56E-01 | 1                  | 4.79E-01 | 1                  | 4.79E-01 |                    |          |                    |          |
| STRN3     | 14  | 3                  | 1.07E-01 | 3                  | 1.07E-01 | 1                  | 4.79E-01 | 1                  | 4.79E-01 | 2                  | 6.23E-01 | 2                  | 6.23E-01 |
| RGS10     | 10  | 1                  | 7.56E-01 | 1                  | 7.56E-01 | 1                  | 4.79E-01 | 1                  | 4.79E-01 |                    |          |                    |          |
| STOX1     | 10  | 4                  | 4.22E-02 | 4                  | 4.22E-02 | 1                  | 4.93E-01 | 1                  | 4.93E-01 | 3                  | 4.79E-01 | 3                  | 4.79E-01 |
| ALG5      | 13  | 1                  | 7.41E-01 | 1                  | 7.41E-01 | 1                  | 4.79E-01 | 1                  | 4.79E-01 |                    |          |                    |          |
| MFSD1     | 3   | 1                  | 7.41E-01 | 1                  | 7.41E-01 | 1                  | 4.79E-01 | 1                  | 4.79E-01 |                    |          |                    |          |
| ARID1A    | 1   | 1                  | 7.41E-01 | 1                  | 7.41E-01 | 1                  | 4.79E-01 | 1                  | 4.79E-01 |                    |          |                    |          |
| TAF8      | 6   | 1                  | 7.41E-01 | 1                  | 7.41E-01 | 1                  | 4.79E-01 | 1                  | 4.79E-01 |                    |          |                    |          |
| MRPS17    | 7   | 1                  | 7.41E-01 | 1                  | 7.41E-01 | 1                  | 4.79E-01 | 1                  | 4.79E-01 |                    |          |                    |          |
| PHF19     | 9   | 1                  | 7.41E-01 | 1                  | 7.41E-01 | 1                  | 4.79E-01 | 1                  | 4.79E-01 |                    |          |                    |          |
| MRPS31    | 13  | 1                  | 7.41E-01 | 1                  | 7.41E-01 | 1                  | 4.79E-01 | 1                  | 4.79E-01 |                    |          |                    |          |
| RBCK1     | 20  | 1                  | 7.51E-01 | 1                  | 7.51E-01 | 1                  | 4.79E-01 | 1                  | 4.79E-01 |                    |          |                    |          |
| WNK2      | 9   | 8                  | 7.11E-01 | 8                  | 7.11E-01 | 7                  | 4.80E-01 | 7                  | 4.80E-01 | 4                  | 7.34E-01 | 4                  | 7.34E-01 |
| TLN2      | 15  | 13                 | 6.66E-01 | 13                 | 6.66E-01 | 10                 | 6.92E-01 | 10                 | 6.92E-01 | 7                  | 4.80E-01 | 7                  | 4.80E-01 |
| GPR55     | 2   | 1                  | 7.46E-01 | 1                  | 7.46E-01 | 1                  | 4.80E-01 | 1                  | 4.80E-01 |                    |          |                    |          |
| AUP1      | 2   | 1                  | 7.46E-01 | 1                  | 7.46E-01 | 1                  | 4.80E-01 | 1                  | 4.80E-01 |                    |          |                    |          |
| CNNM3     | 2   | 1                  | 7.46E-01 | 1                  | 7.46E-01 | 1                  | 4.80E-01 | 1                  | 4.80E-01 |                    |          |                    |          |
| TMEM242   | 6   | 1                  | 7.52E-01 | 1                  | 7.52E-01 | 1                  | 4.80E-01 | 1                  | 4.80E-01 |                    |          |                    |          |
| C6orf52   | 6   | 1                  | 7.52E-01 | 1                  | 7.52E-01 | 1                  | 4.80E-01 | 1                  | 4.80E-01 |                    |          |                    |          |

| SetID    | Chr | ADEH- vs NA        |          |                    |          | ADEH+ vs ADEH-     |          |                    |          | ADEH+ vs NA        |          |                    |          |
|----------|-----|--------------------|----------|--------------------|----------|--------------------|----------|--------------------|----------|--------------------|----------|--------------------|----------|
|          |     | rarenovel          |          | all                |          | rarenovel          |          | all                |          | rarenovel          |          | all                |          |
|          |     | N variants in test | p-value  | N variants in test | p-value  | N variants in test | p-value  | N variants in test | p-value  | N variants in test | p-value  | N variants in test | p-value  |
| CARD16   | 11  | 1                  | 7.52E-01 | 1                  | 7.52E-01 | 1                  | 4.80E-01 | 1                  | 4.80E-01 |                    |          |                    |          |
| IL1R1    | 2   | 1                  | 7.14E-01 | 1                  | 7.14E-01 | 1                  | 4.80E-01 | 1                  | 4.80E-01 | 1                  | 6.17E-01 | 1                  | 6.17E-01 |
| METTL22  | 16  | 1                  | 7.52E-01 | 1                  | 7.52E-01 | 1                  | 4.80E-01 | 1                  | 4.80E-01 |                    |          |                    |          |
| METTL1   | 12  | 1                  | 7.52E-01 | 1                  | 7.52E-01 | 1                  | 4.80E-01 | 1                  | 4.80E-01 |                    |          |                    |          |
| CTSV     | 9   | 2                  | 4.00E-01 | 2                  | 4.00E-01 | 1                  | 4.80E-01 | 1                  | 4.80E-01 | 1                  | 6.70E-01 | 1                  | 6.70E-01 |
| GUK1     | 1   | 1                  | 7.52E-01 | 1                  | 7.52E-01 | 1                  | 4.80E-01 | 1                  | 4.80E-01 |                    |          |                    |          |
| ATP2B1   | 12  | 1                  | 7.52E-01 | 1                  | 7.52E-01 | 1                  | 4.80E-01 | 1                  | 4.80E-01 |                    |          |                    |          |
| ZDHHC13  | 11  | 1                  | 7.52E-01 | 1                  | 7.52E-01 | 1                  | 4.80E-01 | 1                  | 4.80E-01 |                    |          |                    |          |
| NFATC1   | 18  | 6                  | 6.93E-01 | 6                  | 6.93E-01 | 5                  | 4.80E-01 | 5                  | 4.80E-01 | 2                  | 6.34E-01 | 2                  | 6.34E-01 |
| SMTN     | 22  | 9                  | 8.81E-02 | 9                  | 8.81E-02 | 8                  | 4.80E-01 | 8                  | 4.80E-01 | 6                  | 9.13E-01 | 6                  | 9.13E-01 |
| TEX37    | 2   | 5                  | 9.93E-02 | 5                  | 9.93E-02 | 2                  | 6.50E-01 | 2                  | 6.50E-01 | 3                  | 4.80E-01 | 3                  | 4.80E-01 |
| CRLF3    | 17  | 1                  | 7.49E-01 | 1                  | 7.49E-01 | 1                  | 4.80E-01 | 1                  | 4.80E-01 |                    |          |                    |          |
| CHI3L1   | 1   | 3                  | 7.28E-02 | 3                  | 7.28E-02 | 1                  | 4.80E-01 | 1                  | 4.80E-01 | 3                  | 4.97E-01 | 3                  | 4.97E-01 |
| CCT4     | 2   | 2                  | 4.02E-01 | 2                  | 4.02E-01 | 1                  | 4.80E-01 | 1                  | 4.80E-01 | 1                  | 6.70E-01 | 1                  | 6.70E-01 |
| TMEM177  | 2   | 1                  | 9.43E-02 | 1                  | 9.43E-02 | 1                  | 1.00E+00 | 1                  | 1.00E+00 | 1                  | 4.80E-01 | 1                  | 4.80E-01 |
| SSTR2    | 17  | 1                  | 7.50E-01 | 1                  | 7.50E-01 | 1                  | 4.80E-01 | 1                  | 4.80E-01 |                    |          |                    |          |
| MTHFD1   | 14  | 2                  | 3.67E-01 | 2                  | 3.67E-01 | 1                  | 4.80E-01 | 1                  | 4.80E-01 | 1                  | 6.18E-01 | 1                  | 6.18E-01 |
| CAP2     | 6   | 1                  | 7.50E-01 | 1                  | 7.50E-01 | 1                  | 4.80E-01 | 1                  | 4.80E-01 |                    |          |                    |          |
| ZNF573   | 19  | 1                  | 7.50E-01 | 2                  | 7.45E-01 | 1                  | 4.80E-01 | 2                  | 4.97E-01 |                    |          | 1                  | 1.00E+00 |
| KBTBD12  | 3   | 2                  | 3.47E-01 | 2                  | 3.47E-01 | 1                  | 4.80E-01 | 1                  | 4.80E-01 | 1                  | 6.04E-01 | 1                  | 6.04E-01 |
| KCNH1    | 1   | 2                  | 3.27E-01 | 2                  | 3.27E-01 | 1                  | 4.80E-01 | 1                  | 4.80E-01 | 2                  | 6.50E-01 | 2                  | 6.50E-01 |
| RFPL4B   | 6   | 1                  | 7.50E-01 | 1                  | 7.50E-01 | 1                  | 4.80E-01 | 1                  | 4.80E-01 |                    |          |                    |          |
| ZNF239   | 10  | 2                  | 5.39E-01 | 3                  | 5.39E-01 | 2                  | 6.30E-01 | 3                  | 6.30E-01 |                    |          | 1                  | 4.80E-01 |
| CDH9     | 5   | 1                  | 4.00E-01 | 1                  | 4.00E-01 | 1                  | 4.80E-01 | 1                  | 4.80E-01 |                    |          |                    |          |
| SMC6     | 2   | 1                  | 7.58E-01 | 1                  | 7.58E-01 | 1                  | 4.80E-01 | 1                  | 4.80E-01 |                    |          |                    |          |
| CPSF3    | 2   | 2                  | 5.63E-01 | 2                  | 5.63E-01 | 1                  | 4.80E-01 | 1                  | 4.80E-01 | 1                  | 5.67E-01 | 1                  | 5.67E-01 |
| OR10J5   | 1   | 2                  | 4.06E-01 | 2                  | 4.06E-01 | 1                  | 4.80E-01 | 1                  | 4.80E-01 | 1                  | 6.59E-01 | 1                  | 6.59E-01 |
| TRPV4    | 12  | 5                  | 4.11E-01 | 5                  | 4.11E-01 | 4                  | 8.11E-01 | 4                  | 8.11E-01 | 2                  | 4.80E-01 | 2                  | 4.80E-01 |
| RBM20    | 10  | 7                  | 3.61E-01 | 7                  | 3.61E-01 | 6                  | 4.80E-01 | 6                  | 4.80E-01 | 1                  | 6.04E-01 | 1                  | 6.04E-01 |
| KARS     | 16  | 3                  | 1.52E-01 | 3                  | 1.52E-01 | 3                  | 4.81E-01 | 3                  | 4.81E-01 |                    |          |                    |          |
| SYDE2    | 1   | 2                  | 3.55E-01 | 2                  | 3.55E-01 | 1                  | 4.81E-01 | 1                  | 4.81E-01 | 1                  | 6.18E-01 | 1                  | 6.18E-01 |
| NHP2     | 5   | 1                  | 7.50E-01 | 1                  | 7.50E-01 | 1                  | 4.81E-01 | 1                  | 4.81E-01 |                    |          |                    |          |
| ZNF623   | 8   | 1                  | 7.50E-01 | 1                  | 7.50E-01 | 1                  | 4.81E-01 | 1                  | 4.81E-01 |                    |          |                    |          |
| PTAFR    | 1   | 2                  | 3.77E-01 | 2                  | 3.77E-01 | 1                  | 4.81E-01 | 1                  | 4.81E-01 | 1                  | 6.18E-01 | 1                  | 6.18E-01 |
| EFEMP1   | 2   | 1                  | 7.50E-01 | 1                  | 7.50E-01 | 1                  | 4.81E-01 | 1                  | 4.81E-01 |                    |          |                    |          |
| SCIMP    | 17  | 1                  | 7.50E-01 | 1                  | 7.50E-01 | 1                  | 4.81E-01 | 1                  | 4.81E-01 |                    |          |                    |          |
| FAM46B   | 1   | 1                  | 7.49E-01 | 1                  | 7.49E-01 | 1                  | 4.81E-01 | 1                  | 4.81E-01 |                    |          |                    |          |
| RAB29    | 1   | 1                  | 7.49E-01 | 1                  | 7.49E-01 | 1                  | 4.81E-01 | 1                  | 4.81E-01 |                    |          |                    |          |
| CNNM1    | 10  | 1                  | 7.49E-01 | 1                  | 7.49E-01 | 1                  | 4.81E-01 | 1                  | 4.81E-01 |                    |          |                    |          |
| PLEKHA8  | 7   | 1                  | 7.49E-01 | 1                  | 7.49E-01 | 1                  | 4.81E-01 | 1                  | 4.81E-01 |                    |          |                    |          |
| HOXB1    | 17  | 1                  | 7.49E-01 | 1                  | 7.49E-01 | 1                  | 4.81E-01 | 1                  | 4.81E-01 |                    |          |                    |          |
| NPEPPS   | 17  | 1                  | 7.49E-01 | 1                  | 7.49E-01 | 1                  | 4.81E-01 | 1                  | 4.81E-01 |                    |          |                    |          |
| C1orf146 | 1   | 2                  | 4.42E-01 | 2                  | 4.42E-01 | 1                  | 4.81E-01 | 1                  | 4.81E-01 | 1                  | 6.31E-01 | 1                  | 6.31E-01 |
| CACFD1   | 9   | 1                  | 7.10E-01 | 1                  | 7.10E-01 | 1                  | 4.81E-01 | 1                  | 4.81E-01 | 1                  | 6.01E-01 | 1                  | 6.01E-01 |
| PNN      | 14  | 1                  | 7.59E-01 | 1                  | 7.59E-01 | 1                  | 4.81E-01 | 1                  | 4.81E-01 |                    |          |                    |          |
| SYCN     | 19  | 1                  | 7.59E-01 | 1                  | 7.59E-01 | 1                  | 4.81E-01 | 1                  | 4.81E-01 |                    |          |                    |          |
| RAD51C   | 17  | 3                  | 2.87E-02 | 3                  | 2.87E-02 | 2                  | 1.00E+00 | 2                  | 1.00E+00 | 2                  | 4.81E-01 | 2                  | 4.81E-01 |
| PITPNM3  | 17  | 4                  | 1.21E-01 | 4                  | 1.21E-01 | 4                  | 4.81E-01 | 4                  | 4.81E-01 |                    |          |                    |          |

| SetID    | Chr | ADEH- vs NA        |          |                    |          | ADEH+ vs ADEH-     |          |                    |          | ADEH+ vs NA        |          |                    |          |
|----------|-----|--------------------|----------|--------------------|----------|--------------------|----------|--------------------|----------|--------------------|----------|--------------------|----------|
|          |     | rare novel         |          | all                |          | rare novel         |          | all                |          | rare novel         |          | all                |          |
|          |     | N variants in test | p-value  | N variants in test | p-value  | N variants in test | p-value  | N variants in test | p-value  | N variants in test | p-value  | N variants in test | p-value  |
| TRIM60   | 4   | 3                  | 5.26E-01 | 3                  | 5.26E-01 | 3                  | 4.81E-01 | 3                  | 4.81E-01 | 1                  | 6.06E-01 | 1                  | 6.06E-01 |
| SLX4IP   | 20  | 1                  | 7.42E-01 | 1                  | 7.42E-01 | 1                  | 4.81E-01 | 1                  | 4.81E-01 |                    |          |                    |          |
| NCOA6    | 20  | 3                  | 6.39E-02 | 3                  | 6.39E-02 | 1                  | 4.81E-01 | 1                  | 4.81E-01 | 3                  | 4.85E-01 | 3                  | 4.85E-01 |
| GIT1     | 17  | 2                  | 4.72E-01 | 2                  | 4.72E-01 | 1                  | 4.81E-01 | 1                  | 4.81E-01 | 1                  | 6.18E-01 | 1                  | 6.18E-01 |
| DEFB123  | 20  | 1                  | 7.42E-01 | 1                  | 7.42E-01 | 1                  | 4.81E-01 | 1                  | 4.81E-01 |                    |          |                    |          |
| FAM53C   | 5   | 1                  | 7.42E-01 | 1                  | 7.42E-01 | 1                  | 4.81E-01 | 1                  | 4.81E-01 |                    |          |                    |          |
| BLVRB    | 19  | 2                  | 4.70E-01 | 2                  | 4.70E-01 | 1                  | 4.81E-01 | 1                  | 4.81E-01 | 1                  | 6.12E-01 | 1                  | 6.12E-01 |
| PGM3     | 6   | 1                  | 7.42E-01 | 1                  | 7.42E-01 | 1                  | 4.82E-01 | 1                  | 4.82E-01 |                    |          |                    |          |
| SMYD2    | 1   | 1                  | 7.42E-01 | 1                  | 7.42E-01 | 1                  | 4.82E-01 | 1                  | 4.82E-01 |                    |          |                    |          |
| PRSS22   | 16  | 1                  | 7.42E-01 | 1                  | 7.42E-01 | 1                  | 4.82E-01 | 1                  | 4.82E-01 |                    |          |                    |          |
| DDX21    | 10  | 2                  | 4.68E-01 | 2                  | 4.68E-01 | 1                  | 4.82E-01 | 1                  | 4.82E-01 | 1                  | 6.30E-01 | 1                  | 6.30E-01 |
| SLC1A2   | 11  | 1                  | 7.42E-01 | 1                  | 7.42E-01 | 1                  | 4.82E-01 | 1                  | 4.82E-01 |                    |          |                    |          |
| EPHA3    | 3   | 5                  | 9.29E-02 | 5                  | 9.29E-02 | 3                  | 7.26E-01 | 3                  | 7.26E-01 | 2                  | 4.82E-01 | 2                  | 4.82E-01 |
| AMOTL2   | 3   | 4                  | 4.89E-01 | 4                  | 4.89E-01 | 3                  | 7.29E-01 | 3                  | 7.29E-01 | 3                  | 4.82E-01 | 3                  | 4.82E-01 |
| PLSCR5   | 3   | 6                  | 6.53E-01 | 6                  | 6.53E-01 | 4                  | 5.40E-01 | 4                  | 5.40E-01 | 3                  | 4.82E-01 | 3                  | 4.82E-01 |
| SASH1    | 6   | 9                  | 8.95E-01 | 9                  | 8.95E-01 | 7                  | 5.77E-01 | 7                  | 5.77E-01 | 5                  | 4.82E-01 | 5                  | 4.82E-01 |
| INPP5F   | 10  | 3                  | 1.69E-01 | 3                  | 1.69E-01 | 1                  | 4.82E-01 | 1                  | 4.82E-01 | 2                  | 6.36E-01 | 2                  | 6.36E-01 |
| FAM209A  | 20  | 1                  | 7.48E-01 | 1                  | 7.48E-01 | 1                  | 4.82E-01 | 1                  | 4.82E-01 |                    |          |                    |          |
| TCF7     | 5   | 1                  | 7.48E-01 | 1                  | 7.48E-01 | 1                  | 4.82E-01 | 1                  | 4.82E-01 |                    |          |                    |          |
| RSRC1    | 3   | 1                  | 7.48E-01 | 1                  | 7.48E-01 | 1                  | 4.82E-01 | 1                  | 4.82E-01 |                    |          |                    |          |
| GCGR     | 17  | 1                  | 7.48E-01 | 1                  | 7.48E-01 | 1                  | 4.82E-01 | 1                  | 4.82E-01 |                    |          |                    |          |
| TMEM126B | 11  | 1                  | 7.08E-01 | 1                  | 7.08E-01 | 1                  | 4.82E-01 | 1                  | 4.82E-01 | 1                  | 6.80E-01 | 1                  | 6.80E-01 |
| YBX1     | 1   | 1                  | 7.48E-01 | 1                  | 7.48E-01 | 1                  | 4.82E-01 | 1                  | 4.82E-01 |                    |          |                    |          |
| HIRIP3   | 16  | 4                  | 1.56E-01 | 4                  | 1.56E-01 | 4                  | 4.83E-01 | 4                  | 4.83E-01 |                    |          |                    |          |
| FAM135A  | 6   | 3                  | 6.02E-03 | 3                  | 6.02E-03 |                    |          |                    |          | 3                  | 4.83E-01 | 3                  | 4.83E-01 |
| TIFA     | 4   | 2                  | 8.30E-03 | 2                  | 8.30E-03 |                    |          |                    |          | 2                  | 4.83E-01 | 2                  | 4.83E-01 |
| CCDC142  | 2   | 3                  | 1.44E-01 | 3                  | 1.44E-01 | 1                  | 4.83E-01 | 1                  | 4.83E-01 | 2                  | 6.44E-01 | 2                  | 6.44E-01 |
| TMCC2    | 1   | 1                  | 7.51E-01 | 1                  | 7.51E-01 | 1                  | 4.83E-01 | 1                  | 4.83E-01 |                    |          |                    |          |
| KRT9     | 17  | 1                  | 7.51E-01 | 1                  | 7.51E-01 | 1                  | 4.83E-01 | 1                  | 4.83E-01 |                    |          |                    |          |
| HADHB    | 2   | 2                  | 4.69E-01 | 2                  | 4.69E-01 | 1                  | 4.83E-01 | 1                  | 4.83E-01 | 1                  | 5.88E-01 | 1                  | 5.88E-01 |
| ZNF333   | 19  | 1                  | 7.51E-01 | 1                  | 7.51E-01 | 1                  | 4.83E-01 | 1                  | 4.83E-01 |                    |          |                    |          |
| EYA1     | 8   | 6                  | 5.59E-01 | 6                  | 5.59E-01 | 5                  | 4.83E-01 | 5                  | 4.83E-01 | 1                  | 5.81E-01 | 1                  | 5.81E-01 |
| CSNK1A1L | 13  | 1                  | 7.49E-01 | 1                  | 7.49E-01 | 1                  | 4.83E-01 | 1                  | 4.83E-01 |                    |          |                    |          |
| DPPA2    | 3   | 1                  | 7.49E-01 | 1                  | 7.49E-01 | 1                  | 4.83E-01 | 1                  | 4.83E-01 |                    |          |                    |          |
| IMPA2    | 18  | 1                  | 7.49E-01 | 1                  | 7.49E-01 | 1                  | 4.83E-01 | 1                  | 4.83E-01 |                    |          |                    |          |
| URM1     | 9   | 2                  | 4.66E-01 | 2                  | 4.66E-01 | 1                  | 4.83E-01 | 1                  | 4.83E-01 | 1                  | 6.13E-01 | 1                  | 6.13E-01 |
| EDRF1    | 10  | 1                  | 7.44E-01 | 1                  | 7.44E-01 | 1                  | 4.83E-01 | 1                  | 4.83E-01 |                    |          |                    |          |
| RNF180   | 5   | 2                  | 4.60E-01 | 2                  | 4.60E-01 | 1                  | 4.83E-01 | 1                  | 4.83E-01 | 1                  | 6.64E-01 | 1                  | 6.64E-01 |
| RBP1     | 3   | 1                  | 7.44E-01 | 1                  | 7.44E-01 | 1                  | 4.83E-01 | 1                  | 4.83E-01 |                    |          |                    |          |
| NME3     | 16  | 1                  | 6.55E-01 | 1                  | 6.55E-01 | 1                  | 4.83E-01 | 1                  | 4.83E-01 | 1                  | 7.02E-01 | 1                  | 7.02E-01 |
| RING1    | 6   | 1                  | 7.44E-01 | 1                  | 7.44E-01 | 1                  | 4.83E-01 | 1                  | 4.83E-01 |                    |          |                    |          |
| RIPPLY3  | 21  | 1                  | 7.44E-01 | 1                  | 7.44E-01 | 1                  | 4.83E-01 | 1                  | 4.83E-01 |                    |          |                    |          |
| PCSK9    | 1   | 4                  | 2.37E-01 | 4                  | 2.37E-01 | 2                  | 6.07E-01 | 2                  | 6.07E-01 | 3                  | 4.83E-01 | 3                  | 4.83E-01 |
| C18orf54 | 18  | 3                  | 5.08E-03 | 3                  | 5.08E-03 |                    |          |                    |          | 3                  | 4.83E-01 | 3                  | 4.83E-01 |
| STAMBPL1 | 10  | 3                  | 4.43E-01 | 3                  | 4.43E-01 | 1                  | 1.00E+00 | 1                  | 1.00E+00 | 3                  | 4.83E-01 | 3                  | 4.83E-01 |
| PCNXL4   | 14  | 5                  | 1.70E-01 | 5                  | 1.70E-01 | 2                  | 6.04E-01 | 2                  | 6.04E-01 | 3                  | 4.83E-01 | 3                  | 4.83E-01 |
| CEP131   | 17  | 9                  | 8.35E-01 | 9                  | 8.35E-01 | 7                  | 5.84E-01 | 7                  | 5.84E-01 | 5                  | 4.83E-01 | 5                  | 4.83E-01 |
| RAD54L   | 1   | 6                  | 2.54E-01 | 6                  | 2.54E-01 | 3                  | 4.84E-01 | 3                  | 4.84E-01 | 3                  | 5.00E-01 | 3                  | 5.00E-01 |

| SetID    | Chr | ADEH- vs NA        |          |                    |          | ADEH+ vs ADEH-     |          |                    |          | ADEH+ vs NA        |          |                    |          |
|----------|-----|--------------------|----------|--------------------|----------|--------------------|----------|--------------------|----------|--------------------|----------|--------------------|----------|
|          |     | rare novel         |          | all                |          | rare novel         |          | all                |          | rare novel         |          | all                |          |
|          |     | N variants in test | p-value  | N variants in test | p-value  | N variants in test | p-value  | N variants in test | p-value  | N variants in test | p-value  | N variants in test | p-value  |
| RPUSD4   | 11  | 2                  | 3.16E-01 | 2                  | 3.16E-01 | 1                  | 4.84E-01 | 1                  | 4.84E-01 | 1                  | 6.44E-01 | 1                  | 6.44E-01 |
| EPHA4    | 2   | 1                  | 7.51E-01 | 1                  | 7.51E-01 | 1                  | 4.84E-01 | 1                  | 4.84E-01 |                    |          |                    |          |
| FCAR     | 19  | 2                  | 2.98E-01 | 2                  | 2.98E-01 | 1                  | 4.84E-01 | 1                  | 4.84E-01 | 1                  | 5.95E-01 | 1                  | 5.95E-01 |
| SLC6A11  | 3   | 1                  | 7.51E-01 | 1                  | 7.51E-01 | 1                  | 4.84E-01 | 1                  | 4.84E-01 |                    |          |                    |          |
| LAMA2    | 6   | 16                 | 2.40E-01 | 16                 | 2.40E-01 | 13                 | 4.84E-01 | 13                 | 4.84E-01 | 12                 | 7.17E-01 | 12                 | 7.17E-01 |
| ROBO1    | 3   | 3                  | 5.50E-01 | 3                  | 5.50E-01 | 3                  | 4.84E-01 | 3                  | 4.84E-01 | 1                  | 5.98E-01 | 1                  | 5.98E-01 |
| ALDOC    | 17  | 2                  | 4.77E-01 | 2                  | 4.77E-01 | 1                  | 4.84E-01 | 1                  | 4.84E-01 | 1                  | 5.79E-01 | 1                  | 5.79E-01 |
| SIT1     | 9   | 1                  | 7.48E-01 | 1                  | 7.48E-01 | 1                  | 4.84E-01 | 1                  | 4.84E-01 |                    |          |                    |          |
| TLL11    | 9   | 1                  | 7.48E-01 | 1                  | 7.48E-01 | 1                  | 4.84E-01 | 1                  | 4.84E-01 |                    |          |                    |          |
| EEF1G    | 11  | 1                  | 7.48E-01 | 1                  | 7.48E-01 | 1                  | 4.84E-01 | 1                  | 4.84E-01 |                    |          |                    |          |
| TMEM45A  | 3   | 1                  | 7.46E-01 | 1                  | 7.46E-01 | 1                  | 4.84E-01 | 1                  | 4.84E-01 |                    |          |                    |          |
| TOX      | 8   | 1                  | 7.46E-01 | 1                  | 7.46E-01 | 1                  | 4.84E-01 | 1                  | 4.84E-01 |                    |          |                    |          |
| ATIC     | 2   | 4                  | 4.69E-02 | 4                  | 4.69E-02 | 1                  | 4.84E-01 | 1                  | 4.84E-01 | 3                  | 5.07E-01 | 3                  | 5.07E-01 |
| TMEM150B | 19  | 2                  | 4.16E-01 | 2                  | 4.16E-01 | 1                  | 4.84E-01 | 1                  | 4.84E-01 | 1                  | 6.33E-01 | 1                  | 6.33E-01 |
| PTOV1    | 19  | 2                  | 6.26E-01 | 2                  | 6.26E-01 | 1                  | 4.84E-01 | 1                  | 4.84E-01 | 1                  | 6.29E-01 | 1                  | 6.29E-01 |
| LEP      | 7   | 1                  | 7.46E-01 | 1                  | 7.46E-01 | 1                  | 4.84E-01 | 1                  | 4.84E-01 |                    |          |                    |          |
| DENND2A  | 7   | 2                  | 3.56E-01 | 2                  | 3.56E-01 | 1                  | 4.84E-01 | 1                  | 4.84E-01 | 2                  | 6.48E-01 | 2                  | 6.48E-01 |
| SMCHD1   | 18  | 1                  | 7.50E-01 | 1                  | 7.50E-01 | 1                  | 4.84E-01 | 1                  | 4.84E-01 |                    |          |                    |          |
| MRGPRF   | 11  | 1                  | 7.50E-01 | 1                  | 7.50E-01 | 1                  | 4.84E-01 | 1                  | 4.84E-01 |                    |          |                    |          |
| HLA-DQA1 | 6   | 1                  | 7.53E-01 | 1                  | 7.53E-01 | 1                  | 4.84E-01 | 1                  | 4.84E-01 |                    |          |                    |          |
| SCRN2    | 17  | 7                  | 8.22E-01 | 7                  | 8.22E-01 | 6                  | 9.30E-01 | 6                  | 9.30E-01 | 2                  | 4.84E-01 | 2                  | 4.84E-01 |
| PHF24    | 9   | 3                  | 7.58E-01 | 3                  | 7.58E-01 | 2                  | 5.08E-01 | 2                  | 5.08E-01 | 2                  | 4.84E-01 | 2                  | 4.84E-01 |
| ATP9B    | 18  | 7                  | 8.25E-01 | 7                  | 8.25E-01 | 5                  | 5.20E-01 | 5                  | 5.20E-01 | 3                  | 4.84E-01 | 3                  | 4.84E-01 |
| DUSP6    | 12  | 1                  | 9.20E-01 | 1                  | 9.20E-01 | 1                  | 4.84E-01 | 1                  | 4.84E-01 | 1                  | 6.37E-01 | 1                  | 6.37E-01 |
| OR4D6    | 11  | 4                  | 1.05E-01 | 4                  | 1.05E-01 | 3                  | 4.84E-01 | 3                  | 4.84E-01 | 2                  | 1.00E+00 | 2                  | 1.00E+00 |
| MOV10    | 1   | 1                  | 7.52E-01 | 1                  | 7.52E-01 | 1                  | 4.84E-01 | 1                  | 4.84E-01 |                    |          |                    |          |
| UCHL3    | 13  | 1                  | 7.52E-01 | 1                  | 7.52E-01 | 1                  | 4.84E-01 | 1                  | 4.84E-01 |                    |          |                    |          |
| VKORC1L1 | 7   | 1                  | 7.50E-01 | 1                  | 7.50E-01 | 1                  | 4.84E-01 | 1                  | 4.84E-01 |                    |          |                    |          |
| SNX5     | 20  | 1                  | 7.50E-01 | 1                  | 7.50E-01 | 1                  | 4.84E-01 | 1                  | 4.84E-01 |                    |          |                    |          |
| PHLDA1   | 12  | 2                  | 4.12E-01 | 2                  | 4.12E-01 | 1                  | 4.84E-01 | 1                  | 4.84E-01 | 1                  | 6.45E-01 | 1                  | 6.45E-01 |
| MGAT4A   | 2   | 1                  | 7.50E-01 | 1                  | 7.50E-01 | 1                  | 4.84E-01 | 1                  | 4.84E-01 |                    |          |                    |          |
| GOLM1    | 9   | 1                  | 2.34E-01 | 1                  | 2.34E-01 | 1                  | 4.84E-01 | 1                  | 4.84E-01 |                    |          |                    |          |
| SLC5A11  | 16  | 3                  | 8.25E-02 | 3                  | 8.25E-02 | 1                  | 5.03E-01 | 1                  | 5.03E-01 | 3                  | 4.84E-01 | 3                  | 4.84E-01 |
| LGMM     | 14  | 1                  | 7.49E-01 | 1                  | 7.49E-01 | 1                  | 4.85E-01 | 1                  | 4.85E-01 |                    |          |                    |          |
| NKX3-1   | 8   | 1                  | 7.49E-01 | 1                  | 7.49E-01 | 1                  | 4.85E-01 | 1                  | 4.85E-01 |                    |          |                    |          |
| GPR180   | 13  | 1                  | 7.11E-01 | 1                  | 7.11E-01 | 1                  | 4.85E-01 | 1                  | 4.85E-01 | 1                  | 6.75E-01 | 1                  | 6.75E-01 |
| FAM73A   | 1   | 2                  | 3.26E-01 | 2                  | 3.26E-01 | 1                  | 4.85E-01 | 1                  | 4.85E-01 | 1                  | 6.51E-01 | 1                  | 6.51E-01 |
| AIMP2    | 7   | 2                  | 4.41E-01 | 2                  | 4.41E-01 | 1                  | 4.85E-01 | 1                  | 4.85E-01 | 1                  | 6.59E-01 | 1                  | 6.59E-01 |
| SCFD1    | 14  | 2                  | 6.29E-01 | 2                  | 6.29E-01 | 1                  | 4.85E-01 | 1                  | 4.85E-01 | 1                  | 6.29E-01 | 1                  | 6.29E-01 |
| NXF1     | 11  | 2                  | 5.41E-01 | 2                  | 5.41E-01 | 2                  | 4.85E-01 | 2                  | 4.85E-01 | 1                  | 6.37E-01 | 1                  | 6.37E-01 |
| TDP1     | 14  | 4                  | 1.51E-01 | 4                  | 1.51E-01 | 4                  | 4.85E-01 | 4                  | 4.85E-01 |                    |          |                    |          |
| KCNJ3    | 2   | 1                  | 7.55E-01 | 1                  | 7.55E-01 | 1                  | 4.85E-01 | 1                  | 4.85E-01 |                    |          |                    |          |
| SPDYA    | 2   | 1                  | 7.55E-01 | 1                  | 7.55E-01 | 1                  | 4.85E-01 | 1                  | 4.85E-01 |                    |          |                    |          |
| SFN      | 1   | 1                  | 6.84E-01 | 1                  | 6.84E-01 | 1                  | 4.85E-01 | 1                  | 4.85E-01 | 1                  | 6.49E-01 | 1                  | 6.49E-01 |
| ZSCAN22  | 19  | 1                  | 7.55E-01 | 1                  | 7.55E-01 | 1                  | 4.85E-01 | 1                  | 4.85E-01 |                    |          |                    |          |
| SMCR8    | 17  | 4                  | 4.12E-02 | 4                  | 4.12E-02 | 1                  | 4.85E-01 | 1                  | 4.85E-01 | 3                  | 5.17E-01 | 3                  | 5.17E-01 |
| LTBP3    | 11  | 3                  | 1.21E-01 | 4                  | 4.37E-01 | 1                  | 4.85E-01 | 2                  | 5.52E-01 | 2                  | 6.32E-01 | 3                  | 5.04E-01 |
| SLC6A3   | 5   | 1                  | 7.55E-01 | 1                  | 7.55E-01 | 1                  | 4.85E-01 | 1                  | 4.85E-01 |                    |          |                    |          |

| SetID    | Chr | ADEH- vs NA        |          |                    |          | ADEH+ vs ADEH-     |          |                    |          | ADEH+ vs NA        |          |                    |          |
|----------|-----|--------------------|----------|--------------------|----------|--------------------|----------|--------------------|----------|--------------------|----------|--------------------|----------|
|          |     | rare novel         |          | all                |          | rare novel         |          | all                |          | rare novel         |          | all                |          |
|          |     | N variants in test | p-value  | N variants in test | p-value  | N variants in test | p-value  | N variants in test | p-value  | N variants in test | p-value  | N variants in test | p-value  |
| MMP27    | 11  | 2                  | 4.06E-01 | 2                  | 4.06E-01 | 1                  | 4.85E-01 | 1                  | 4.85E-01 | 1                  | 6.23E-01 | 1                  | 6.23E-01 |
| TRMT10B  | 9   | 1                  | 7.55E-01 | 1                  | 7.55E-01 | 1                  | 4.85E-01 | 1                  | 4.85E-01 |                    |          |                    |          |
| KLHL20   | 1   | 2                  | 3.81E-01 | 2                  | 3.81E-01 | 1                  | 4.85E-01 | 1                  | 4.85E-01 | 1                  | 5.82E-01 | 1                  | 5.82E-01 |
| APOC3    | 11  | 1                  | 7.55E-01 | 1                  | 7.55E-01 | 1                  | 4.85E-01 | 1                  | 4.85E-01 |                    |          |                    |          |
| P2RX1    | 17  | 1                  | 7.55E-01 | 1                  | 7.55E-01 | 1                  | 4.85E-01 | 1                  | 4.85E-01 |                    |          |                    |          |
| SLC31A2  | 9   | 1                  | 7.55E-01 | 1                  | 7.55E-01 | 1                  | 4.85E-01 | 1                  | 4.85E-01 |                    |          |                    |          |
| DUOXA1   | 15  | 3                  | 7.97E-01 | 3                  | 7.97E-01 | 2                  | 4.97E-01 | 2                  | 4.97E-01 | 2                  | 4.85E-01 | 2                  | 4.85E-01 |
| SEMA3E   | 7   | 1                  | 7.05E-01 | 1                  | 7.05E-01 | 1                  | 4.85E-01 | 1                  | 4.85E-01 | 1                  | 6.59E-01 | 1                  | 6.59E-01 |
| RNF216   | 7   | 1                  | 7.52E-01 | 1                  | 7.52E-01 | 1                  | 4.85E-01 | 1                  | 4.85E-01 |                    |          |                    |          |
| RPS6KA2  | 6   | 1                  | 7.52E-01 | 1                  | 7.52E-01 | 1                  | 4.85E-01 | 1                  | 4.85E-01 |                    |          |                    |          |
| COMMD9   | 11  | 1                  | 6.92E-01 | 1                  | 6.92E-01 | 1                  | 4.85E-01 | 1                  | 4.85E-01 | 1                  | 6.63E-01 | 1                  | 6.63E-01 |
| EHD1     | 11  | 1                  | 7.52E-01 | 1                  | 7.52E-01 | 1                  | 4.85E-01 | 1                  | 4.85E-01 |                    |          |                    |          |
| SNRNP40  | 1   | 1                  | 7.52E-01 | 1                  | 7.52E-01 | 1                  | 4.85E-01 | 1                  | 4.85E-01 |                    |          |                    |          |
| TMEM170B | 6   | 1                  | 7.52E-01 | 1                  | 7.52E-01 | 1                  | 4.85E-01 | 1                  | 4.85E-01 |                    |          |                    |          |
| VPS13C   | 15  | 11                 | 7.51E-01 | 11                 | 7.51E-01 | 10                 | 4.85E-01 | 10                 | 4.85E-01 | 3                  | 5.63E-01 | 3                  | 5.63E-01 |
| KIAA0895 | 7   | 1                  | 7.54E-01 | 1                  | 7.54E-01 | 1                  | 4.85E-01 | 1                  | 4.85E-01 |                    |          |                    |          |
| SLC35A4  | 5   | 1                  | 7.54E-01 | 1                  | 7.54E-01 | 1                  | 4.85E-01 | 1                  | 4.85E-01 |                    |          |                    |          |
| LMAN2L   | 2   | 1                  | 7.43E-01 | 1                  | 7.43E-01 | 1                  | 4.85E-01 | 1                  | 4.85E-01 |                    |          |                    |          |
| AGXT     | 2   | 1                  | 7.43E-01 | 1                  | 7.43E-01 | 1                  | 4.85E-01 | 1                  | 4.85E-01 |                    |          |                    |          |
| NDUFB9   | 8   | 2                  | 6.79E-02 | 2                  | 6.79E-02 | 1                  | 4.85E-01 | 1                  | 4.85E-01 | 2                  | 5.04E-01 | 2                  | 5.04E-01 |
| FARSB    | 2   | 2                  | 3.39E-01 | 2                  | 3.39E-01 | 1                  | 4.85E-01 | 1                  | 4.85E-01 | 1                  | 5.69E-01 | 1                  | 5.69E-01 |
| CCKBR    | 11  | 2                  | 4.89E-01 | 2                  | 4.89E-01 | 1                  | 4.85E-01 | 1                  | 4.85E-01 | 1                  | 6.31E-01 | 1                  | 6.31E-01 |
| CFAP20   | 16  | 1                  | 7.43E-01 | 1                  | 7.43E-01 | 1                  | 4.85E-01 | 1                  | 4.85E-01 |                    |          |                    |          |
| EIF4E2   | 2   | 1                  | 7.43E-01 | 1                  | 7.43E-01 | 1                  | 4.85E-01 | 1                  | 4.85E-01 |                    |          |                    |          |
| VPS29    | 12  | 1                  | 7.43E-01 | 1                  | 7.43E-01 | 1                  | 4.85E-01 | 1                  | 4.85E-01 |                    |          |                    |          |
| TXNDC12  | 1   | 1                  | 7.59E-01 | 1                  | 7.59E-01 | 1                  | 4.85E-01 | 1                  | 4.85E-01 |                    |          |                    |          |
| CCDC166  | 8   | 1                  | 7.59E-01 | 1                  | 7.59E-01 | 1                  | 4.85E-01 | 1                  | 4.85E-01 |                    |          |                    |          |
| TLL1     | 4   | 1                  | 7.59E-01 | 1                  | 7.59E-01 | 1                  | 4.85E-01 | 1                  | 4.85E-01 |                    |          |                    |          |
| PPP2R2A  | 8   | 1                  | 7.59E-01 | 1                  | 7.59E-01 | 1                  | 4.85E-01 | 1                  | 4.85E-01 |                    |          |                    |          |
| BORCS8   | 19  | 1                  | 7.59E-01 | 1                  | 7.59E-01 | 1                  | 4.85E-01 | 1                  | 4.85E-01 |                    |          |                    |          |
| LMNTD1   | 12  | 1                  | 7.59E-01 | 1                  | 7.59E-01 | 1                  | 4.85E-01 | 1                  | 4.85E-01 |                    |          |                    |          |
| TEF      | 22  | 1                  | 7.59E-01 | 1                  | 7.59E-01 | 1                  | 4.85E-01 | 1                  | 4.85E-01 |                    |          |                    |          |
| VMAC     | 19  | 1                  | 7.46E-01 | 1                  | 7.46E-01 | 1                  | 4.85E-01 | 1                  | 4.85E-01 |                    |          |                    |          |
| SEL1L2   | 20  | 1                  | 7.46E-01 | 1                  | 7.46E-01 | 1                  | 4.85E-01 | 1                  | 4.85E-01 |                    |          |                    |          |
| PLXDC1   | 17  | 1                  | 7.46E-01 | 2                  | 1.52E-01 | 1                  | 4.85E-01 | 2                  | 7.79E-01 |                    |          | 1                  | 5.67E-01 |
| ALDH1A3  | 15  | 1                  | 7.46E-01 | 1                  | 7.46E-01 | 1                  | 4.85E-01 | 1                  | 4.85E-01 |                    |          |                    |          |
| CCDC57   | 17  | 1                  | 7.46E-01 | 1                  | 7.46E-01 | 1                  | 4.85E-01 | 1                  | 4.85E-01 |                    |          |                    |          |
| VAX2     | 2   | 4                  | 5.75E-01 | 4                  | 5.75E-01 | 2                  | 6.88E-01 | 2                  | 6.88E-01 | 3                  | 4.85E-01 | 3                  | 4.85E-01 |
| CRIP3    | 6   | 1                  | 7.51E-01 | 1                  | 7.51E-01 | 1                  | 4.85E-01 | 1                  | 4.85E-01 |                    |          |                    |          |
| REXO4    | 9   | 2                  | 2.25E-01 | 2                  | 2.25E-01 | 1                  | 4.85E-01 | 1                  | 4.85E-01 | 2                  | 6.39E-01 | 2                  | 6.39E-01 |
| SP140L   | 2   | 2                  | 4.52E-01 | 2                  | 4.52E-01 | 1                  | 4.85E-01 | 1                  | 4.85E-01 | 1                  | 6.30E-01 | 1                  | 6.30E-01 |
| GRTP1    | 13  | 1                  | 7.51E-01 | 1                  | 7.51E-01 | 1                  | 4.85E-01 | 1                  | 4.85E-01 |                    |          |                    |          |
| PCDHGB4  | 5   | 1                  | 7.51E-01 | 1                  | 7.51E-01 | 1                  | 4.85E-01 | 1                  | 4.85E-01 |                    |          |                    |          |
| SRPRA    | 11  | 1                  | 7.51E-01 | 1                  | 7.51E-01 | 1                  | 4.85E-01 | 1                  | 4.85E-01 |                    |          |                    |          |
| CMKLR1   | 12  | 2                  | 5.91E-01 | 2                  | 5.91E-01 | 2                  | 4.85E-01 | 2                  | 4.85E-01 | 2                  | 6.93E-01 | 2                  | 6.93E-01 |
| KIAA1257 | 3   | 2                  | 7.34E-01 | 2                  | 7.34E-01 | 1                  | 4.85E-01 | 1                  | 4.85E-01 | 2                  | 6.08E-01 | 2                  | 6.08E-01 |
| CREBBP   | 16  | 8                  | 8.16E-01 | 8                  | 8.16E-01 | 6                  | 4.85E-01 | 6                  | 4.85E-01 | 2                  | 6.33E-01 | 2                  | 6.33E-01 |
| ACTN1    | 14  | 1                  | 7.52E-01 | 1                  | 7.52E-01 | 1                  | 4.86E-01 | 1                  | 4.86E-01 |                    |          |                    |          |

| SetID      | Chr | ADEH- vs NA        |          |                    |          | ADEH+ vs ADEH-     |          |                    |          | ADEH+ vs NA        |          |                    |          |
|------------|-----|--------------------|----------|--------------------|----------|--------------------|----------|--------------------|----------|--------------------|----------|--------------------|----------|
|            |     | rarenovel          |          | all                |          | rarenovel          |          | all                |          | rarenovel          |          | all                |          |
|            |     | N variants in test | p-value  | N variants in test | p-value  | N variants in test | p-value  | N variants in test | p-value  | N variants in test | p-value  | N variants in test | p-value  |
| SERPINE3   | 13  | 1                  | 7.52E-01 | 1                  | 7.52E-01 | 1                  | 4.86E-01 | 1                  | 4.86E-01 |                    |          |                    |          |
| RRAGC      | 1   | 1                  | 7.52E-01 | 1                  | 7.52E-01 | 1                  | 4.86E-01 | 1                  | 4.86E-01 |                    |          |                    |          |
| LAMP1      | 13  | 2                  | 4.68E-01 | 2                  | 4.68E-01 | 1                  | 4.86E-01 | 1                  | 4.86E-01 | 1                  | 6.56E-01 | 1                  | 6.56E-01 |
| STAT4      | 2   | 1                  | 7.51E-01 | 1                  | 7.51E-01 | 1                  | 4.86E-01 | 1                  | 4.86E-01 |                    |          |                    |          |
| CDH3       | 16  | 3                  | 1.33E-01 | 3                  | 1.33E-01 | 1                  | 4.86E-01 | 1                  | 4.86E-01 | 2                  | 6.34E-01 | 2                  | 6.34E-01 |
| CTPS1      | 1   | 1                  | 7.51E-01 | 1                  | 7.51E-01 | 1                  | 4.86E-01 | 1                  | 4.86E-01 |                    |          |                    |          |
| OR2G6      | 1   | 3                  | 4.88E-03 | 3                  | 4.88E-03 |                    |          |                    |          | 3                  | 4.86E-01 | 3                  | 4.86E-01 |
| KMO        | 1   | 1                  | 7.55E-01 | 1                  | 7.55E-01 | 1                  | 4.86E-01 | 1                  | 4.86E-01 |                    |          |                    |          |
| ADRB2      | 5   | 1                  | 7.55E-01 | 1                  | 7.55E-01 | 1                  | 4.86E-01 | 1                  | 4.86E-01 |                    |          |                    |          |
| DNAJC5B    | 8   | 1                  | 7.55E-01 | 1                  | 7.55E-01 | 1                  | 4.86E-01 | 1                  | 4.86E-01 |                    |          |                    |          |
| PGM2       | 4   | 5                  | 5.13E-01 | 5                  | 5.13E-01 | 3                  | 6.29E-01 | 3                  | 6.29E-01 | 3                  | 4.86E-01 | 3                  | 4.86E-01 |
| OR2T10     | 1   | 1                  | 7.52E-01 | 1                  | 7.52E-01 | 1                  | 4.86E-01 | 1                  | 4.86E-01 |                    |          |                    |          |
| JAG1       | 20  | 2                  | 5.51E-01 | 3                  | 8.13E-01 | 2                  | 6.60E-01 | 3                  | 6.49E-01 |                    |          | 1                  | 4.86E-01 |
| ABCA1      | 9   | 2                  | 5.50E-01 | 2                  | 5.50E-01 | 2                  | 7.44E-01 | 2                  | 7.44E-01 | 2                  | 4.86E-01 | 2                  | 4.86E-01 |
| VSTM2B     | 19  | 1                  | 6.85E-01 | 1                  | 6.85E-01 | 1                  | 4.86E-01 | 1                  | 4.86E-01 | 1                  | 6.28E-01 | 1                  | 6.28E-01 |
| MARK4      | 19  | 1                  | 7.46E-01 | 1                  | 7.46E-01 | 1                  | 4.86E-01 | 1                  | 4.86E-01 |                    |          |                    |          |
| 4-Mar      | 2   | 2                  | 4.87E-01 | 2                  | 4.87E-01 | 1                  | 4.86E-01 | 1                  | 4.86E-01 | 1                  | 6.55E-01 | 1                  | 6.55E-01 |
| OSGEPL1    | 2   | 1                  | 7.46E-01 | 1                  | 7.46E-01 | 1                  | 4.86E-01 | 1                  | 4.86E-01 |                    |          |                    |          |
| NSF        | 17  | 2                  | 4.61E-01 | 2                  | 4.61E-01 | 1                  | 4.86E-01 | 1                  | 4.86E-01 | 1                  | 6.42E-01 | 1                  | 6.42E-01 |
| GIMAP8     | 7   | 1                  | 7.53E-01 | 1                  | 7.53E-01 | 1                  | 4.86E-01 | 1                  | 4.86E-01 |                    |          |                    |          |
| NSUN2      | 5   | 2                  | 4.11E-01 | 2                  | 4.11E-01 | 1                  | 4.86E-01 | 1                  | 4.86E-01 | 1                  | 6.12E-01 | 1                  | 6.12E-01 |
| LIX1       | 5   | 2                  | 4.60E-01 | 2                  | 4.60E-01 | 1                  | 4.86E-01 | 1                  | 4.86E-01 | 1                  | 5.88E-01 | 1                  | 5.88E-01 |
| TRMO       | 9   | 1                  | 7.53E-01 | 1                  | 7.53E-01 | 1                  | 4.86E-01 | 1                  | 4.86E-01 |                    |          |                    |          |
| EIF2D      | 1   | 1                  | 6.62E-01 | 1                  | 6.62E-01 | 1                  | 4.86E-01 | 1                  | 4.86E-01 | 1                  | 6.43E-01 | 1                  | 6.43E-01 |
| GATSLS3    | 22  | 1                  | 7.53E-01 | 1                  | 7.53E-01 | 1                  | 4.86E-01 | 1                  | 4.86E-01 |                    |          |                    |          |
| TMEM63A    | 1   | 3                  | 3.27E-01 | 3                  | 3.27E-01 | 2                  | 4.86E-01 | 2                  | 4.86E-01 | 2                  | 5.08E-01 | 2                  | 5.08E-01 |
| CLU        | 8   | 1                  | 7.45E-01 | 1                  | 7.45E-01 | 1                  | 4.86E-01 | 1                  | 4.86E-01 |                    |          |                    |          |
| ALG12      | 22  | 1                  | 7.45E-01 | 2                  | 8.37E-01 | 1                  | 4.86E-01 | 2                  | 6.25E-01 |                    |          | 1                  | 5.08E-01 |
| SERPINA3   | 14  | 1                  | 7.45E-01 | 1                  | 7.45E-01 | 1                  | 4.86E-01 | 1                  | 4.86E-01 |                    |          |                    |          |
| OR1N1      | 9   | 2                  | 4.25E-01 | 2                  | 4.25E-01 | 1                  | 4.86E-01 | 1                  | 4.86E-01 | 1                  | 6.28E-01 | 1                  | 6.28E-01 |
| SUSD4      | 1   | 1                  | 7.45E-01 | 1                  | 7.45E-01 | 1                  | 4.86E-01 | 1                  | 4.86E-01 |                    |          |                    |          |
| HTR7       | 10  | 1                  | 7.45E-01 | 1                  | 7.45E-01 | 1                  | 4.86E-01 | 1                  | 4.86E-01 |                    |          |                    |          |
| MIS18BP1   | 14  | 5                  | 5.35E-01 | 5                  | 5.35E-01 | 4                  | 4.86E-01 | 4                  | 4.86E-01 | 3                  | 1.00E+00 | 3                  | 1.00E+00 |
| BIVM-ERCC5 | 13  | 9                  | 4.83E-02 | 9                  | 4.83E-02 | 8                  | 4.86E-01 | 8                  | 4.86E-01 | 6                  | 7.26E-01 | 6                  | 7.26E-01 |
| ERCC5      | 13  | 9                  | 4.83E-02 | 9                  | 4.83E-02 | 8                  | 4.86E-01 | 8                  | 4.86E-01 | 6                  | 7.26E-01 | 6                  | 7.26E-01 |
| TMEM255B   | 13  | 2                  | 1.00E+00 | 2                  | 1.00E+00 | 2                  | 4.86E-01 | 2                  | 4.86E-01 | 2                  | 5.67E-01 | 2                  | 5.67E-01 |
| ZNF609     | 15  | 3                  | 1.79E-01 | 3                  | 1.79E-01 | 1                  | 4.87E-01 | 1                  | 4.87E-01 | 2                  | 6.18E-01 | 2                  | 6.18E-01 |
| POLR1A     | 2   | 2                  | 3.48E-01 | 2                  | 3.48E-01 | 1                  | 4.87E-01 | 1                  | 4.87E-01 | 1                  | 6.01E-01 | 1                  | 6.01E-01 |
| IPP        | 1   | 1                  | 7.56E-01 | 1                  | 7.56E-01 | 1                  | 4.87E-01 | 1                  | 4.87E-01 |                    |          |                    |          |
| VWA1       | 1   | 1                  | 7.56E-01 | 1                  | 7.56E-01 | 1                  | 4.87E-01 | 1                  | 4.87E-01 |                    |          |                    |          |
| NDUFB7     | 19  | 1                  | 7.56E-01 | 1                  | 7.56E-01 | 1                  | 4.87E-01 | 1                  | 4.87E-01 |                    |          |                    |          |
| CCND2      | 12  | 1                  | 7.56E-01 | 1                  | 7.56E-01 | 1                  | 4.87E-01 | 1                  | 4.87E-01 |                    |          |                    |          |
| PROK2      | 3   | 1                  | 7.56E-01 | 1                  | 7.56E-01 | 1                  | 4.87E-01 | 1                  | 4.87E-01 |                    |          |                    |          |
| SHCBP1     | 16  | 1                  | 7.59E-01 | 1                  | 7.59E-01 | 1                  | 4.87E-01 | 1                  | 4.87E-01 |                    |          |                    |          |
| USP6NL     | 10  | 2                  | 2.86E-01 | 2                  | 2.86E-01 | 1                  | 4.87E-01 | 1                  | 4.87E-01 | 2                  | 6.45E-01 | 2                  | 6.45E-01 |
| ZNHIT6     | 1   | 1                  | 7.08E-01 | 1                  | 7.08E-01 | 1                  | 4.87E-01 | 1                  | 4.87E-01 | 1                  | 6.18E-01 | 1                  | 6.18E-01 |
| OPN4       | 10  | 1                  | 7.59E-01 | 1                  | 7.59E-01 | 1                  | 4.87E-01 | 1                  | 4.87E-01 |                    |          |                    |          |
| CIB3       | 19  | 1                  | 7.59E-01 | 1                  | 7.59E-01 | 1                  | 4.87E-01 | 1                  | 4.87E-01 |                    |          |                    |          |

| SetID        | Chr | ADEH- vs NA        |          |                    |          | ADEH+ vs ADEH-     |          |                    |          | ADEH+ vs NA        |          |                    |          |
|--------------|-----|--------------------|----------|--------------------|----------|--------------------|----------|--------------------|----------|--------------------|----------|--------------------|----------|
|              |     | rare novel         |          | all                |          | rare novel         |          | all                |          | rare novel         |          | all                |          |
|              |     | N variants in test | p-value  | N variants in test | p-value  | N variants in test | p-value  | N variants in test | p-value  | N variants in test | p-value  | N variants in test | p-value  |
| MFSD2A       | 1   | 1                  | 7.59E-01 | 1                  | 7.59E-01 | 1                  | 4.87E-01 | 1                  | 4.87E-01 |                    |          |                    |          |
| GCNT3        | 15  | 5                  | 8.59E-01 | 5                  | 8.59E-01 | 4                  | 4.87E-01 | 4                  | 4.87E-01 | 2                  | 6.53E-01 | 2                  | 6.53E-01 |
| FGFR1        | 8   | 3                  | 2.65E-01 | 3                  | 2.65E-01 | 2                  | 6.29E-01 | 2                  | 6.29E-01 | 3                  | 4.87E-01 | 3                  | 4.87E-01 |
| MAP1LC3B2    | 12  | 3                  | 6.69E-03 | 3                  | 6.69E-03 |                    |          |                    |          | 3                  | 4.87E-01 | 3                  | 4.87E-01 |
| C17orf102    | 17  | 1                  | 6.87E-01 | 1                  | 6.87E-01 | 1                  | 4.87E-01 | 1                  | 4.87E-01 | 1                  | 6.06E-01 | 1                  | 6.06E-01 |
| PRKACA       | 19  | 1                  | 7.49E-01 | 1                  | 7.49E-01 | 1                  | 4.87E-01 | 1                  | 4.87E-01 |                    |          |                    |          |
| MUC21        | 6   | 1                  | 7.49E-01 | 1                  | 7.49E-01 | 1                  | 4.87E-01 | 1                  | 4.87E-01 |                    |          |                    |          |
| SPINK1       | 5   | 1                  | 7.49E-01 | 1                  | 7.49E-01 | 1                  | 4.87E-01 | 1                  | 4.87E-01 |                    |          |                    |          |
| CTNNA1       | 5   | 1                  | 7.49E-01 | 1                  | 7.49E-01 | 1                  | 4.87E-01 | 1                  | 4.87E-01 |                    |          |                    |          |
| CALCOCO1     | 12  | 1                  | 7.49E-01 | 1                  | 7.49E-01 | 1                  | 4.87E-01 | 1                  | 4.87E-01 |                    |          |                    |          |
| LUZP2        | 11  | 2                  | 3.78E-01 | 2                  | 3.78E-01 | 1                  | 4.87E-01 | 1                  | 4.87E-01 | 1                  | 6.47E-01 | 1                  | 6.47E-01 |
| JRKL         | 11  | 1                  | 7.49E-01 | 1                  | 7.49E-01 | 1                  | 4.87E-01 | 1                  | 4.87E-01 |                    |          |                    |          |
| PPY          | 17  | 1                  | 7.49E-01 | 1                  | 7.49E-01 | 1                  | 4.87E-01 | 1                  | 4.87E-01 |                    |          |                    |          |
| PRPF4B       | 6   | 1                  | 6.89E-01 | 1                  | 6.89E-01 | 1                  | 4.87E-01 | 1                  | 4.87E-01 | 1                  | 6.28E-01 | 1                  | 6.28E-01 |
| TEKT1        | 17  | 3                  | 3.21E-01 | 3                  | 3.21E-01 | 3                  | 4.87E-01 | 3                  | 4.87E-01 |                    |          |                    |          |
| UNC5C        | 4   | 5                  | 1.22E-01 | 5                  | 1.22E-01 | 2                  | 1.00E+00 | 2                  | 1.00E+00 | 4                  | 4.87E-01 | 4                  | 4.87E-01 |
| NTF4         | 19  | 1                  | 7.45E-01 | 1                  | 7.45E-01 | 1                  | 4.87E-01 | 1                  | 4.87E-01 |                    |          |                    |          |
| ZYG11B       | 1   | 1                  | 7.45E-01 | 1                  | 7.45E-01 | 1                  | 4.87E-01 | 1                  | 4.87E-01 |                    |          |                    |          |
| KTN1         | 14  | 5                  | 7.06E-01 | 5                  | 7.06E-01 | 3                  | 5.24E-01 | 3                  | 5.24E-01 | 3                  | 4.87E-01 | 3                  | 4.87E-01 |
| SLC13A5      | 17  | 1                  | 7.57E-01 | 1                  | 7.57E-01 | 1                  | 4.88E-01 | 1                  | 4.88E-01 |                    |          |                    |          |
| RALGAPB      | 20  | 1                  | 7.57E-01 | 1                  | 7.57E-01 | 1                  | 4.88E-01 | 1                  | 4.88E-01 |                    |          |                    |          |
| LRRC74A      | 14  | 1                  | 7.57E-01 | 1                  | 7.57E-01 | 1                  | 4.88E-01 | 1                  | 4.88E-01 |                    |          |                    |          |
| ZNF485       | 10  | 2                  | 3.11E-01 | 2                  | 3.11E-01 | 1                  | 4.88E-01 | 1                  | 4.88E-01 | 1                  | 6.81E-01 | 1                  | 6.81E-01 |
| SLC6A9       | 1   | 2                  | 3.69E-01 | 2                  | 3.69E-01 | 1                  | 4.88E-01 | 1                  | 4.88E-01 | 1                  | 6.34E-01 | 1                  | 6.34E-01 |
| HPN          | 19  | 1                  | 7.57E-01 | 1                  | 7.57E-01 | 1                  | 4.88E-01 | 1                  | 4.88E-01 |                    |          |                    |          |
| POLD2        | 7   | 2                  | 4.62E-01 | 2                  | 4.62E-01 | 1                  | 4.88E-01 | 1                  | 4.88E-01 | 1                  | 6.13E-01 | 1                  | 6.13E-01 |
| SLC9A2       | 2   | 1                  | 7.48E-01 | 1                  | 7.48E-01 | 1                  | 4.88E-01 | 1                  | 4.88E-01 |                    |          |                    |          |
| HOPX         | 4   | 1                  | 7.48E-01 | 1                  | 7.48E-01 | 1                  | 4.88E-01 | 1                  | 4.88E-01 |                    |          |                    |          |
| FCGRT        | 19  | 1                  | 7.48E-01 | 1                  | 7.48E-01 | 1                  | 4.88E-01 | 1                  | 4.88E-01 |                    |          |                    |          |
| MALT1        | 18  | 1                  | 7.48E-01 | 1                  | 7.48E-01 | 1                  | 4.88E-01 | 1                  | 4.88E-01 |                    |          |                    |          |
| MPP4         | 2   | 1                  | 7.48E-01 | 1                  | 7.48E-01 | 1                  | 4.88E-01 | 1                  | 4.88E-01 |                    |          |                    |          |
| CSDE1        | 1   | 1                  | 7.48E-01 | 1                  | 7.48E-01 | 1                  | 4.88E-01 | 1                  | 4.88E-01 |                    |          |                    |          |
| SF3B3        | 16  | 1                  | 7.40E-01 | 1                  | 7.40E-01 | 1                  | 4.88E-01 | 1                  | 4.88E-01 |                    |          |                    |          |
| MON1B        | 16  | 1                  | 7.40E-01 | 1                  | 7.40E-01 | 1                  | 4.88E-01 | 1                  | 4.88E-01 |                    |          |                    |          |
| SCD5         | 4   | 2                  | 3.38E-01 | 2                  | 3.38E-01 | 1                  | 4.88E-01 | 1                  | 4.88E-01 | 1                  | 6.52E-01 | 1                  | 6.52E-01 |
| AZGP1        | 7   | 1                  | 7.40E-01 | 1                  | 7.40E-01 | 1                  | 4.88E-01 | 1                  | 4.88E-01 |                    |          |                    |          |
| CALB1        | 8   | 1                  | 7.40E-01 | 1                  | 7.40E-01 | 1                  | 4.88E-01 | 1                  | 4.88E-01 |                    |          |                    |          |
| TARBP2       | 12  | 1                  | 7.40E-01 | 1                  | 7.40E-01 | 1                  | 4.88E-01 | 1                  | 4.88E-01 |                    |          |                    |          |
| FAM64A       | 17  | 2                  | 5.48E-01 | 2                  | 5.48E-01 | 1                  | 4.88E-01 | 1                  | 4.88E-01 | 1                  | 6.17E-01 | 1                  | 6.17E-01 |
| HRG          | 3   | 2                  | 4.78E-01 | 2                  | 4.78E-01 | 1                  | 4.88E-01 | 1                  | 4.88E-01 | 1                  | 5.93E-01 | 1                  | 5.93E-01 |
| TCP11L2      | 12  | 1                  | 7.50E-01 | 1                  | 7.50E-01 | 1                  | 4.88E-01 | 1                  | 4.88E-01 |                    |          |                    |          |
| MAGI2        | 7   | 2                  | 3.88E-01 | 2                  | 3.88E-01 | 1                  | 4.88E-01 | 1                  | 4.88E-01 | 1                  | 6.30E-01 | 1                  | 6.30E-01 |
| DSE          | 6   | 1                  | 7.50E-01 | 1                  | 7.50E-01 | 1                  | 4.88E-01 | 1                  | 4.88E-01 |                    |          |                    |          |
| ST6GALNAC2   | 17  | 1                  | 7.13E-01 | 1                  | 7.13E-01 | 1                  | 4.88E-01 | 1                  | 4.88E-01 | 1                  | 6.44E-01 | 1                  | 6.44E-01 |
| BCL2L2-PABPN | 14  | 1                  | 7.50E-01 | 1                  | 7.50E-01 | 1                  | 4.88E-01 | 1                  | 4.88E-01 |                    |          |                    |          |
| SP4          | 7   | 1                  | 7.50E-01 | 1                  | 7.50E-01 | 1                  | 4.88E-01 | 1                  | 4.88E-01 |                    |          |                    |          |
| PABPN1       | 14  | 1                  | 7.50E-01 | 1                  | 7.50E-01 | 1                  | 4.88E-01 | 1                  | 4.88E-01 |                    |          |                    |          |
| ADSSL1       | 14  | 5                  | 4.13E-01 | 5                  | 4.13E-01 | 4                  | 4.88E-01 | 4                  | 4.88E-01 | 1                  | 6.11E-01 | 1                  | 6.11E-01 |



| SetID    | Chr | ADEH- vs NA        |          |                    |          | ADEH+ vs ADEH-     |          |                    |          | ADEH+ vs NA        |          |                    |          |
|----------|-----|--------------------|----------|--------------------|----------|--------------------|----------|--------------------|----------|--------------------|----------|--------------------|----------|
|          |     | rarenovel          |          | all                |          | rarenovel          |          | all                |          | rarenovel          |          | all                |          |
|          |     | N variants in test | p-value  | N variants in test | p-value  | N variants in test | p-value  | N variants in test | p-value  | N variants in test | p-value  | N variants in test | p-value  |
| RABGGTA  | 14  | 4                  | 8.40E-01 | 4                  | 8.40E-01 | 3                  | 4.88E-01 | 3                  | 4.88E-01 | 2                  | 6.44E-01 | 2                  | 6.44E-01 |
| COL17A1  | 10  | 7                  | 4.32E-01 | 7                  | 4.32E-01 | 6                  | 4.88E-01 | 6                  | 4.88E-01 | 1                  | 6.49E-01 | 1                  | 6.49E-01 |
| WDFY3    | 4   | 4                  | 5.15E-02 | 4                  | 5.15E-02 | 1                  | 4.92E-01 | 1                  | 4.92E-01 | 3                  | 4.89E-01 | 3                  | 4.89E-01 |
| FCER1A   | 1   | 1                  | 7.51E-01 | 1                  | 7.51E-01 | 1                  | 4.89E-01 | 1                  | 4.89E-01 |                    |          |                    |          |
| SSBP4    | 19  | 1                  | 7.51E-01 | 1                  | 7.51E-01 | 1                  | 4.89E-01 | 1                  | 4.89E-01 |                    |          |                    |          |
| EPS15L1  | 19  | 2                  | 3.98E-01 | 2                  | 3.98E-01 | 1                  | 4.89E-01 | 1                  | 4.89E-01 | 1                  | 6.18E-01 | 1                  | 6.18E-01 |
| PTPN9    | 15  | 1                  | 7.51E-01 | 1                  | 7.51E-01 | 1                  | 4.89E-01 | 1                  | 4.89E-01 |                    |          |                    |          |
| NCF4     | 22  | 1                  | 7.36E-01 | 1                  | 7.36E-01 | 1                  | 4.89E-01 | 1                  | 4.89E-01 | 1                  | 6.03E-01 | 1                  | 6.03E-01 |
| DLGAP2   | 8   | 5                  | 6.25E-01 | 5                  | 6.25E-01 | 4                  | 4.89E-01 | 4                  | 4.89E-01 | 1                  | 6.04E-01 | 1                  | 6.04E-01 |
| USP8     | 15  | 2                  | 5.67E-01 | 2                  | 5.67E-01 | 2                  | 1.00E+00 | 2                  | 1.00E+00 | 1                  | 4.89E-01 | 1                  | 4.89E-01 |
| EXOC3L4  | 14  | 4                  | 3.11E-02 | 5                  | 3.10E-02 | 2                  | 6.02E-01 | 3                  | 5.86E-01 | 2                  | 4.99E-01 | 3                  | 4.89E-01 |
| ETNK2    | 1   | 1                  | 7.43E-01 | 1                  | 7.43E-01 | 1                  | 4.89E-01 | 1                  | 4.89E-01 |                    |          |                    |          |
| CD84     | 1   | 2                  | 4.28E-01 | 2                  | 4.28E-01 | 1                  | 4.89E-01 | 1                  | 4.89E-01 | 1                  | 5.49E-01 | 1                  | 5.49E-01 |
| CKMT2    | 5   | 3                  | 1.93E-01 | 3                  | 1.93E-01 | 1                  | 4.89E-01 | 1                  | 4.89E-01 | 2                  | 6.29E-01 | 2                  | 6.29E-01 |
| MRPS11   | 15  | 1                  | 7.43E-01 | 1                  | 7.43E-01 | 1                  | 4.89E-01 | 1                  | 4.89E-01 |                    |          |                    |          |
| ZIC5     | 13  | 3                  | 7.20E-01 | 3                  | 7.20E-01 | 2                  | 5.10E-01 | 2                  | 5.10E-01 | 2                  | 4.89E-01 | 2                  | 4.89E-01 |
| PLCB3    | 11  | 2                  | 4.28E-01 | 3                  | 6.65E-01 | 1                  | 4.89E-01 | 2                  | 7.51E-01 | 1                  | 6.85E-01 | 2                  | 8.21E-01 |
| PFKFB3   | 10  | 1                  | 7.52E-01 | 1                  | 7.52E-01 | 1                  | 4.89E-01 | 1                  | 4.89E-01 |                    |          |                    |          |
| TSPAN18  | 11  | 1                  | 7.52E-01 | 1                  | 7.52E-01 | 1                  | 4.89E-01 | 1                  | 4.89E-01 |                    |          |                    |          |
| ME2      | 18  | 1                  | 7.52E-01 | 1                  | 7.52E-01 | 1                  | 4.89E-01 | 1                  | 4.89E-01 |                    |          |                    |          |
| SLC30A7  | 1   | 1                  | 7.52E-01 | 1                  | 7.52E-01 | 1                  | 4.89E-01 | 1                  | 4.89E-01 |                    |          |                    |          |
| SLC35A5  | 3   | 4                  | 1.58E-01 | 4                  | 1.58E-01 | 4                  | 4.90E-01 | 4                  | 4.90E-01 |                    |          |                    |          |
| KCNA7    | 19  | 1                  | 7.52E-01 | 1                  | 7.52E-01 | 1                  | 4.90E-01 | 1                  | 4.90E-01 |                    |          |                    |          |
| CD36     | 7   | 2                  | 4.11E-01 | 2                  | 4.11E-01 | 1                  | 4.90E-01 | 1                  | 4.90E-01 | 1                  | 6.57E-01 | 1                  | 6.57E-01 |
| GPR78    | 4   | 1                  | 7.52E-01 | 1                  | 7.52E-01 | 1                  | 4.90E-01 | 1                  | 4.90E-01 |                    |          |                    |          |
| ATG4B    | 2   | 1                  | 7.52E-01 | 1                  | 7.52E-01 | 1                  | 4.90E-01 | 1                  | 4.90E-01 |                    |          |                    |          |
| FAM102A  | 9   | 1                  | 7.52E-01 | 1                  | 7.52E-01 | 1                  | 4.90E-01 | 1                  | 4.90E-01 |                    |          |                    |          |
| MZB1     | 5   | 1                  | 7.52E-01 | 1                  | 7.52E-01 | 1                  | 4.90E-01 | 1                  | 4.90E-01 |                    |          |                    |          |
| SNX32    | 11  | 1                  | 7.52E-01 | 1                  | 7.52E-01 | 1                  | 4.90E-01 | 1                  | 4.90E-01 |                    |          |                    |          |
| ZNF200   | 16  | 3                  | 1.58E-01 | 3                  | 1.58E-01 | 3                  | 4.90E-01 | 3                  | 4.90E-01 |                    |          |                    |          |
| LCORL    | 4   | 1                  | 7.38E-01 | 1                  | 7.38E-01 | 1                  | 4.90E-01 | 1                  | 4.90E-01 |                    |          |                    |          |
| ECH1     | 19  | 2                  | 2.14E-01 | 3                  | 1.67E-01 | 1                  | 4.90E-01 | 2                  | 5.50E-01 | 2                  | 6.26E-01 | 3                  | 8.92E-01 |
| SCAMP4   | 19  | 2                  | 4.29E-01 | 2                  | 4.29E-01 | 1                  | 4.90E-01 | 1                  | 4.90E-01 | 1                  | 6.10E-01 | 1                  | 6.10E-01 |
| OCIAD1   | 4   | 1                  | 7.38E-01 | 1                  | 7.38E-01 | 1                  | 4.90E-01 | 1                  | 4.90E-01 |                    |          |                    |          |
| CRYGA    | 2   | 2                  | 2.98E-01 | 2                  | 2.98E-01 | 1                  | 4.90E-01 | 1                  | 4.90E-01 | 2                  | 6.05E-01 | 2                  | 6.05E-01 |
| IL4R     | 16  | 1                  | 7.38E-01 | 1                  | 7.38E-01 | 1                  | 4.90E-01 | 1                  | 4.90E-01 |                    |          |                    |          |
| DENND6B  | 22  | 3                  | 3.19E-01 | 3                  | 3.19E-01 | 3                  | 4.90E-01 | 3                  | 4.90E-01 |                    |          |                    |          |
| JARID2   | 6   | 4                  | 2.35E-01 | 4                  | 2.35E-01 | 3                  | 4.90E-01 | 3                  | 4.90E-01 | 3                  | 6.08E-01 | 3                  | 6.08E-01 |
| HCN4     | 15  | 1                  | 7.50E-01 | 1                  | 7.50E-01 | 1                  | 4.90E-01 | 1                  | 4.90E-01 |                    |          |                    |          |
| RASSF3   | 12  | 2                  | 4.84E-01 | 2                  | 4.84E-01 | 1                  | 4.90E-01 | 1                  | 4.90E-01 | 1                  | 6.19E-01 | 1                  | 6.19E-01 |
| WFDC1    | 16  | 1                  | 7.50E-01 | 1                  | 7.50E-01 | 1                  | 4.90E-01 | 1                  | 4.90E-01 |                    |          |                    |          |
| SWAP70   | 11  | 5                  | 1.70E-01 | 5                  | 1.70E-01 | 5                  | 4.90E-01 | 5                  | 4.90E-01 |                    |          |                    |          |
| RBM42    | 19  | 1                  | 7.55E-01 | 1                  | 7.55E-01 | 1                  | 4.90E-01 | 1                  | 4.90E-01 |                    |          |                    |          |
| UTP15    | 5   | 1                  | 7.55E-01 | 1                  | 7.55E-01 | 1                  | 4.90E-01 | 1                  | 4.90E-01 |                    |          |                    |          |
| TMEM161A | 19  | 2                  | 4.43E-01 | 2                  | 4.43E-01 | 1                  | 4.90E-01 | 1                  | 4.90E-01 | 1                  | 6.46E-01 | 1                  | 6.46E-01 |
| JAKMIP2  | 5   | 1                  | 7.46E-01 | 1                  | 7.46E-01 | 1                  | 4.90E-01 | 1                  | 4.90E-01 |                    |          |                    |          |
| POU2F2   | 19  | 1                  | 7.46E-01 | 1                  | 7.46E-01 | 1                  | 4.90E-01 | 1                  | 4.90E-01 |                    |          |                    |          |
| STIM1    | 11  | 5                  | 1.00E+00 | 5                  | 1.00E+00 | 4                  | 4.90E-01 | 4                  | 4.90E-01 | 3                  | 5.02E-01 | 3                  | 5.02E-01 |

| SetID    | Chr | ADEH- vs NA        |          |                    |          | ADEH+ vs ADEH-     |          |                    |          | ADEH+ vs NA        |          |                    |          |
|----------|-----|--------------------|----------|--------------------|----------|--------------------|----------|--------------------|----------|--------------------|----------|--------------------|----------|
|          |     | rarenovel          |          | all                |          | rarenovel          |          | all                |          | rarenovel          |          | all                |          |
|          |     | N variants in test | p-value  | N variants in test | p-value  | N variants in test | p-value  | N variants in test | p-value  | N variants in test | p-value  | N variants in test | p-value  |
| OR5AC2   | 3   | 2                  | 2.86E-01 | 3                  | 2.92E-01 | 2                  | 6.11E-01 | 3                  | 5.94E-01 |                    |          | 1                  | 4.90E-01 |
| BTRC     | 10  | 1                  | 7.44E-01 | 1                  | 7.44E-01 | 1                  | 4.90E-01 | 1                  | 4.90E-01 |                    |          |                    |          |
| SYNPO2L  | 10  | 2                  | 3.99E-01 | 5                  | 4.73E-01 | 1                  | 4.90E-01 | 4                  | 6.11E-01 | 1                  | 6.47E-01 | 4                  | 8.01E-01 |
| FAM69C   | 18  | 1                  | 7.44E-01 | 1                  | 7.44E-01 | 1                  | 4.90E-01 | 1                  | 4.90E-01 |                    |          |                    |          |
| MRPL18   | 6   | 1                  | 7.44E-01 | 1                  | 7.44E-01 | 1                  | 4.90E-01 | 1                  | 4.90E-01 |                    |          |                    |          |
| RASSF4   | 10  | 1                  | 6.60E-01 | 1                  | 6.60E-01 | 1                  | 4.90E-01 | 1                  | 4.90E-01 | 1                  | 6.01E-01 | 1                  | 6.01E-01 |
| LEPROT   | 1   | 1                  | 6.65E-01 | 1                  | 6.65E-01 | 1                  | 4.90E-01 | 1                  | 4.90E-01 | 1                  | 5.99E-01 | 1                  | 5.99E-01 |
| C21orf2  | 21  | 2                  | 3.99E-01 | 2                  | 3.99E-01 | 1                  | 4.90E-01 | 1                  | 4.90E-01 | 1                  | 6.49E-01 | 1                  | 6.49E-01 |
| FKBP7    | 2   | 1                  | 7.44E-01 | 1                  | 7.44E-01 | 1                  | 4.90E-01 | 1                  | 4.90E-01 |                    |          |                    |          |
| TNK1     | 17  | 1                  | 7.44E-01 | 1                  | 7.44E-01 | 1                  | 4.90E-01 | 1                  | 4.90E-01 |                    |          |                    |          |
| OTOL1    | 3   | 2                  | 7.09E-01 | 3                  | 7.09E-01 | 2                  | 4.90E-01 | 3                  | 4.90E-01 | 1                  | 6.42E-01 | 2                  | 6.42E-01 |
| RNASEH2A | 19  | 1                  | 7.44E-01 | 1                  | 7.44E-01 | 1                  | 4.90E-01 | 1                  | 4.90E-01 |                    |          |                    |          |
| DHCR7    | 11  | 3                  | 1.57E-01 | 3                  | 1.57E-01 | 1                  | 4.90E-01 | 1                  | 4.90E-01 | 2                  | 6.51E-01 | 2                  | 6.51E-01 |
| C17orf97 | 17  | 1                  | 7.44E-01 | 1                  | 7.44E-01 | 1                  | 4.90E-01 | 1                  | 4.90E-01 |                    |          |                    |          |
| PARVA    | 11  | 1                  | 6.69E-01 | 1                  | 6.69E-01 | 1                  | 4.90E-01 | 1                  | 4.90E-01 | 1                  | 6.23E-01 | 1                  | 6.23E-01 |
| PRL      | 6   | 1                  | 7.44E-01 | 1                  | 7.44E-01 | 1                  | 4.90E-01 | 1                  | 4.90E-01 |                    |          |                    |          |
| NUAK2    | 1   | 3                  | 8.50E-02 | 3                  | 8.50E-02 | 1                  | 5.40E-01 | 1                  | 5.40E-01 | 3                  | 4.90E-01 | 3                  | 4.90E-01 |
| PEG3     | 19  | 8                  | 4.61E-01 | 8                  | 4.61E-01 | 5                  | 4.90E-01 | 5                  | 4.90E-01 | 3                  | 5.05E-01 | 3                  | 5.05E-01 |
| PELI3    | 11  | 1                  | 7.51E-01 | 1                  | 7.51E-01 | 1                  | 4.90E-01 | 1                  | 4.90E-01 |                    |          |                    |          |
| REV1     | 2   | 1                  | 7.51E-01 | 1                  | 7.51E-01 | 1                  | 4.90E-01 | 1                  | 4.90E-01 |                    |          |                    |          |
| CNTN3    | 3   | 1                  | 7.51E-01 | 1                  | 7.51E-01 | 1                  | 4.90E-01 | 1                  | 4.90E-01 |                    |          |                    |          |
| HSPA12A  | 10  | 2                  | 3.96E-01 | 2                  | 3.96E-01 | 1                  | 4.90E-01 | 1                  | 4.90E-01 | 1                  | 6.50E-01 | 1                  | 6.50E-01 |
| MORN4    | 10  | 1                  | 7.51E-01 | 1                  | 7.51E-01 | 1                  | 4.90E-01 | 1                  | 4.90E-01 |                    |          |                    |          |
| ZNF32    | 10  | 1                  | 7.51E-01 | 1                  | 7.51E-01 | 1                  | 4.90E-01 | 1                  | 4.90E-01 |                    |          |                    |          |
| KIAA1551 | 12  | 4                  | 2.43E-01 | 4                  | 2.43E-01 | 2                  | 6.19E-01 | 2                  | 6.19E-01 | 3                  | 4.90E-01 | 3                  | 4.90E-01 |
| TRIM16   | 17  | 2                  | 4.26E-01 | 2                  | 4.26E-01 | 1                  | 4.90E-01 | 1                  | 4.90E-01 | 1                  | 6.30E-01 | 1                  | 6.30E-01 |
| KYNU     | 2   | 3                  | 1.40E-01 | 3                  | 1.40E-01 | 1                  | 4.90E-01 | 1                  | 4.90E-01 | 2                  | 6.40E-01 | 2                  | 6.40E-01 |
| HAT1     | 2   | 3                  | 1.12E-01 | 3                  | 1.12E-01 | 1                  | 4.90E-01 | 1                  | 4.90E-01 | 2                  | 6.32E-01 | 2                  | 6.32E-01 |
| GPR149   | 3   | 1                  | 7.51E-01 | 1                  | 7.51E-01 | 1                  | 4.90E-01 | 1                  | 4.90E-01 |                    |          |                    |          |
| ARNTL    | 11  | 1                  | 7.51E-01 | 1                  | 7.51E-01 | 1                  | 4.90E-01 | 1                  | 4.90E-01 |                    |          |                    |          |
| CXCL12   | 10  | 1                  | 7.51E-01 | 1                  | 7.51E-01 | 1                  | 4.90E-01 | 1                  | 4.90E-01 |                    |          |                    |          |
| FZD4     | 11  | 1                  | 7.45E-01 | 1                  | 7.45E-01 | 1                  | 4.90E-01 | 1                  | 4.90E-01 |                    |          |                    |          |
| BAP1     | 3   | 1                  | 7.45E-01 | 1                  | 7.45E-01 | 1                  | 4.90E-01 | 1                  | 4.90E-01 |                    |          |                    |          |
| ZBTB4    | 17  | 2                  | 4.48E-01 | 2                  | 4.48E-01 | 1                  | 4.90E-01 | 1                  | 4.90E-01 | 1                  | 6.59E-01 | 1                  | 6.59E-01 |
| C8orf48  | 8   | 1                  | 7.45E-01 | 1                  | 7.45E-01 | 1                  | 4.90E-01 | 1                  | 4.90E-01 |                    |          |                    |          |
| HRASLS2  | 11  | 1                  | 7.45E-01 | 1                  | 7.45E-01 | 1                  | 4.90E-01 | 1                  | 4.90E-01 |                    |          |                    |          |
| NDUFS3   | 11  | 1                  | 7.45E-01 | 1                  | 7.45E-01 | 1                  | 4.90E-01 | 1                  | 4.90E-01 |                    |          |                    |          |
| HAUS3    | 4   | 1                  | 7.51E-01 | 1                  | 7.51E-01 | 1                  | 4.91E-01 | 1                  | 4.91E-01 |                    |          |                    |          |
| ATP5B    | 12  | 1                  | 7.51E-01 | 1                  | 7.51E-01 | 1                  | 4.91E-01 | 1                  | 4.91E-01 |                    |          |                    |          |
| LRRC8C   | 1   | 1                  | 7.51E-01 | 1                  | 7.51E-01 | 1                  | 4.91E-01 | 1                  | 4.91E-01 |                    |          |                    |          |
| USP21    | 1   | 1                  | 7.51E-01 | 1                  | 7.51E-01 | 1                  | 4.91E-01 | 1                  | 4.91E-01 |                    |          |                    |          |
| DLG2     | 11  | 1                  | 7.51E-01 | 1                  | 7.51E-01 | 1                  | 4.91E-01 | 1                  | 4.91E-01 |                    |          |                    |          |
| CASP9    | 1   | 1                  | 7.51E-01 | 1                  | 7.51E-01 | 1                  | 4.91E-01 | 1                  | 4.91E-01 |                    |          |                    |          |
| NFIA     | 1   | 1                  | 7.51E-01 | 1                  | 7.51E-01 | 1                  | 4.91E-01 | 1                  | 4.91E-01 |                    |          |                    |          |
| HES5     | 1   | 1                  | 7.51E-01 | 1                  | 7.51E-01 | 1                  | 4.91E-01 | 1                  | 4.91E-01 |                    |          |                    |          |
| UBE2O    | 17  | 2                  | 1.40E-01 | 2                  | 1.40E-01 | 2                  | 4.91E-01 | 2                  | 4.91E-01 |                    |          |                    |          |
| GRWD1    | 19  | 3                  | 5.30E-03 | 3                  | 5.30E-03 |                    |          |                    |          | 3                  | 4.91E-01 | 3                  | 4.91E-01 |
| NR1I2    | 3   | 4                  | 2.26E-01 | 4                  | 2.26E-01 | 2                  | 4.91E-01 | 2                  | 4.91E-01 | 3                  | 1.00E+00 | 3                  | 1.00E+00 |

| SetID          | Chr | ADEH- vs NA        |          |                    |          | ADEH+ vs ADEH-     |          |                    |          | ADEH+ vs NA        |          |                    |          |
|----------------|-----|--------------------|----------|--------------------|----------|--------------------|----------|--------------------|----------|--------------------|----------|--------------------|----------|
|                |     | rarenovel          |          | all                |          | rarenovel          |          | all                |          | rarenovel          |          | all                |          |
|                |     | N variants in test | p-value  | N variants in test | p-value  | N variants in test | p-value  | N variants in test | p-value  | N variants in test | p-value  | N variants in test | p-value  |
| BRD4           | 19  | 1                  | 6.09E-01 | 1                  | 6.09E-01 | 1                  | 1.00E+00 | 1                  | 1.00E+00 | 1                  | 4.91E-01 | 1                  | 4.91E-01 |
| TBC1D8         | 2   | 1                  | 7.53E-01 | 1                  | 7.53E-01 | 1                  | 4.91E-01 | 1                  | 4.91E-01 |                    |          |                    |          |
| FREM3          | 4   | 1                  | 7.53E-01 | 1                  | 7.53E-01 | 1                  | 4.91E-01 | 1                  | 4.91E-01 |                    |          |                    |          |
| MUSTN1         | 3   | 1                  | 7.53E-01 | 1                  | 7.53E-01 | 1                  | 4.91E-01 | 1                  | 4.91E-01 |                    |          |                    |          |
| ROR1           | 1   | 1                  | 7.53E-01 | 1                  | 7.53E-01 | 1                  | 4.91E-01 | 1                  | 4.91E-01 |                    |          |                    |          |
| TMEM110-MU     | 3   | 1                  | 7.53E-01 | 1                  | 7.53E-01 | 1                  | 4.91E-01 | 1                  | 4.91E-01 |                    |          |                    |          |
| ISM2           | 14  | 2                  | 3.49E-01 | 2                  | 3.49E-01 | 1                  | 4.91E-01 | 1                  | 4.91E-01 | 1                  | 5.93E-01 | 1                  | 5.93E-01 |
| ARG2           | 14  | 1                  | 7.49E-01 | 1                  | 7.49E-01 | 1                  | 4.91E-01 | 1                  | 4.91E-01 |                    |          |                    |          |
| ILF3           | 19  | 1                  | 7.49E-01 | 1                  | 7.49E-01 | 1                  | 4.91E-01 | 1                  | 4.91E-01 |                    |          |                    |          |
| LOC100505549   | 18  | 1                  | 7.49E-01 | 1                  | 7.49E-01 | 1                  | 4.91E-01 | 1                  | 4.91E-01 |                    |          |                    |          |
| MOGAT3         | 7   | 1                  | 7.56E-01 | 1                  | 7.56E-01 | 1                  | 4.91E-01 | 1                  | 4.91E-01 |                    |          |                    |          |
| THOP1          | 19  | 5                  | 2.86E-02 | 5                  | 2.86E-02 | 1                  | 4.91E-01 | 1                  | 4.91E-01 | 4                  | 5.77E-01 | 4                  | 5.77E-01 |
| TRIML2         | 4   | 2                  | 3.43E-01 | 2                  | 3.43E-01 | 1                  | 4.91E-01 | 1                  | 4.91E-01 | 1                  | 6.01E-01 | 1                  | 6.01E-01 |
| KLF9           | 9   | 1                  | 7.56E-01 | 1                  | 7.56E-01 | 1                  | 4.91E-01 | 1                  | 4.91E-01 |                    |          |                    |          |
| MDFI           | 6   | 1                  | 7.56E-01 | 1                  | 7.56E-01 | 1                  | 4.91E-01 | 1                  | 4.91E-01 |                    |          |                    |          |
| LRRC28         | 15  | 1                  | 7.56E-01 | 1                  | 7.56E-01 | 1                  | 4.91E-01 | 1                  | 4.91E-01 |                    |          |                    |          |
| ZNF277         | 7   | 1                  | 3.97E-01 | 1                  | 3.97E-01 | 1                  | 4.91E-01 | 1                  | 4.91E-01 |                    |          |                    |          |
| THAP4          | 2   | 1                  | 7.55E-01 | 1                  | 7.55E-01 | 1                  | 4.91E-01 | 1                  | 4.91E-01 |                    |          |                    |          |
| F2RL3          | 19  | 2                  | 3.96E-01 | 2                  | 3.96E-01 | 1                  | 4.91E-01 | 1                  | 4.91E-01 | 1                  | 6.38E-01 | 1                  | 6.38E-01 |
| GTF2E2         | 8   | 2                  | 4.66E-01 | 2                  | 4.66E-01 | 1                  | 4.91E-01 | 1                  | 4.91E-01 | 1                  | 6.05E-01 | 1                  | 6.05E-01 |
| NARS           | 18  | 1                  | 7.55E-01 | 1                  | 7.55E-01 | 1                  | 4.91E-01 | 1                  | 4.91E-01 |                    |          |                    |          |
| POM121L12      | 7   |                    |          | 1                  | 5.71E-01 |                    |          | 1                  | 1.00E+00 |                    |          | 1                  | 4.91E-01 |
| COG5           | 7   | 4                  | 8.00E-01 | 4                  | 8.00E-01 | 3                  | 4.91E-01 | 3                  | 4.91E-01 | 1                  | 6.58E-01 | 1                  | 6.58E-01 |
| SLC22A24       | 11  | 5                  | 2.05E-01 | 7                  | 2.05E-01 | 3                  | 5.01E-01 | 5                  | 4.91E-01 | 4                  | 8.88E-01 | 6                  | 8.69E-01 |
| ARFIP1         | 4   | 2                  | 5.64E-02 | 2                  | 5.64E-02 | 1                  | 5.09E-01 | 1                  | 5.09E-01 | 2                  | 4.92E-01 | 2                  | 4.92E-01 |
| SLC9A4         | 2   | 1                  | 7.55E-01 | 1                  | 7.55E-01 | 1                  | 4.92E-01 | 1                  | 4.92E-01 |                    |          |                    |          |
| ZNF345         | 19  | 1                  | 7.55E-01 | 1                  | 7.55E-01 | 1                  | 4.92E-01 | 1                  | 4.92E-01 |                    |          |                    |          |
| WNT2           | 7   | 2                  | 4.87E-01 | 2                  | 4.87E-01 | 1                  | 4.92E-01 | 1                  | 4.92E-01 | 1                  | 6.98E-01 | 1                  | 6.98E-01 |
| CCBL2          | 1   | 2                  | 4.72E-01 | 2                  | 4.72E-01 | 1                  | 4.92E-01 | 1                  | 4.92E-01 | 1                  | 6.19E-01 | 1                  | 6.19E-01 |
| RABL3          | 3   | 1                  | 7.55E-01 | 1                  | 7.55E-01 | 1                  | 4.92E-01 | 1                  | 4.92E-01 |                    |          |                    |          |
| JMJD7          | 15  | 2                  | 3.36E-01 | 2                  | 3.36E-01 | 1                  | 4.92E-01 | 1                  | 4.92E-01 | 1                  | 6.01E-01 | 1                  | 6.01E-01 |
| ADCY5          | 3   | 1                  | 7.57E-01 | 1                  | 7.57E-01 | 1                  | 4.92E-01 | 1                  | 4.92E-01 |                    |          |                    |          |
| GLIPR2         | 9   | 1                  | 7.57E-01 | 1                  | 7.57E-01 | 1                  | 4.92E-01 | 1                  | 4.92E-01 |                    |          |                    |          |
| HNF4G          | 8   | 1                  | 7.57E-01 | 1                  | 7.57E-01 | 1                  | 4.92E-01 | 1                  | 4.92E-01 |                    |          |                    |          |
| REG1A          | 2   | 1                  | 7.57E-01 | 1                  | 7.57E-01 | 1                  | 4.92E-01 | 1                  | 4.92E-01 |                    |          |                    |          |
| YKT6           | 7   | 1                  | 7.57E-01 | 1                  | 7.57E-01 | 1                  | 4.92E-01 | 1                  | 4.92E-01 |                    |          |                    |          |
| FAM13B         | 5   | 6                  | 5.96E-01 | 6                  | 5.96E-01 | 5                  | 4.92E-01 | 5                  | 4.92E-01 | 1                  | 6.01E-01 | 1                  | 6.01E-01 |
| FAM101A        | 12  | 1                  | 7.48E-01 | 1                  | 7.48E-01 | 1                  | 4.92E-01 | 1                  | 4.92E-01 |                    |          |                    |          |
| ZNF664-FAM101A | 12  | 1                  | 7.48E-01 | 1                  | 7.48E-01 | 1                  | 4.92E-01 | 1                  | 4.92E-01 |                    |          |                    |          |
| VPS4A          | 16  | 1                  | 7.48E-01 | 1                  | 7.48E-01 | 1                  | 4.92E-01 | 1                  | 4.92E-01 |                    |          |                    |          |
| CENPF          | 1   | 16                 | 2.52E-01 | 16                 | 2.52E-01 | 11                 | 1.00E+00 | 11                 | 1.00E+00 | 7                  | 4.92E-01 | 7                  | 4.92E-01 |
| GMPR2          | 14  | 1                  | 8.60E-01 | 1                  | 8.60E-01 | 1                  | 5.66E-01 | 1                  | 5.66E-01 | 1                  | 4.92E-01 | 1                  | 4.92E-01 |
| ACSL1          | 4   | 1                  | 7.54E-01 | 1                  | 7.54E-01 | 1                  | 4.92E-01 | 1                  | 4.92E-01 |                    |          |                    |          |
| PICK1          | 22  | 1                  | 7.54E-01 | 1                  | 7.54E-01 | 1                  | 4.92E-01 | 1                  | 4.92E-01 |                    |          |                    |          |
| YAP1           | 11  | 1                  | 7.16E-01 | 1                  | 7.16E-01 | 1                  | 4.92E-01 | 1                  | 4.92E-01 | 1                  | 5.81E-01 | 1                  | 5.81E-01 |
| PPIL2          | 22  | 2                  | 5.80E-01 | 2                  | 5.80E-01 | 2                  | 4.92E-01 | 2                  | 4.92E-01 | 1                  | 6.28E-01 | 1                  | 6.28E-01 |
| IPO5           | 13  | 1                  | 7.58E-01 | 1                  | 7.58E-01 | 1                  | 4.92E-01 | 1                  | 4.92E-01 |                    |          |                    |          |
| KRTAP4-5       | 17  | 1                  | 7.58E-01 | 2                  | 6.05E-01 | 1                  | 4.92E-01 | 2                  | 7.29E-01 |                    |          | 1                  | 1.00E+00 |

| SetID     | Chr | ADEH- vs NA        |          |                    |          | ADEH+ vs ADEH-     |          |                    |          | ADEH+ vs NA        |          |                    |          |
|-----------|-----|--------------------|----------|--------------------|----------|--------------------|----------|--------------------|----------|--------------------|----------|--------------------|----------|
|           |     | rarenovel          |          | all                |          | rarenovel          |          | all                |          | rarenovel          |          | all                |          |
|           |     | N variants in test | p-value  | N variants in test | p-value  | N variants in test | p-value  | N variants in test | p-value  | N variants in test | p-value  | N variants in test | p-value  |
| FOXP4     | 6   | 2                  | 3.41E-01 | 2                  | 3.41E-01 | 1                  | 4.92E-01 | 1                  | 4.92E-01 | 1                  | 6.42E-01 | 1                  | 6.42E-01 |
| CIB1      | 15  | 1                  | 7.58E-01 | 1                  | 7.58E-01 | 1                  | 4.92E-01 | 1                  | 4.92E-01 |                    |          |                    |          |
| OPRK1     | 8   | 1                  | 7.02E-01 | 1                  | 7.02E-01 | 1                  | 4.92E-01 | 1                  | 4.92E-01 | 1                  | 6.06E-01 | 1                  | 6.06E-01 |
| RNASE12   | 14  | 1                  | 7.58E-01 | 1                  | 7.58E-01 | 1                  | 4.92E-01 | 1                  | 4.92E-01 |                    |          |                    |          |
| SIGLEC5   | 19  | 3                  | 3.07E-01 | 3                  | 3.07E-01 | 2                  | 4.92E-01 | 2                  | 4.92E-01 | 1                  | 5.92E-01 | 1                  | 5.92E-01 |
| 1-Mar     | 4   | 2                  | 3.39E-01 | 2                  | 3.39E-01 | 1                  | 4.93E-01 | 1                  | 4.93E-01 | 1                  | 6.01E-01 | 1                  | 6.01E-01 |
| PSAP      | 10  | 2                  | 3.70E-01 | 2                  | 3.70E-01 | 1                  | 4.93E-01 | 1                  | 4.93E-01 | 1                  | 6.64E-01 | 1                  | 6.64E-01 |
| ZNF260    | 19  | 2                  | 3.68E-01 | 2                  | 3.68E-01 | 1                  | 4.93E-01 | 1                  | 4.93E-01 | 2                  | 6.45E-01 | 2                  | 6.45E-01 |
| ANO5      | 11  | 1                  | 7.59E-01 | 1                  | 7.59E-01 | 1                  | 4.93E-01 | 1                  | 4.93E-01 |                    |          |                    |          |
| USB1      | 16  | 2                  | 3.40E-01 | 2                  | 3.40E-01 | 1                  | 4.93E-01 | 1                  | 4.93E-01 | 1                  | 6.34E-01 | 1                  | 6.34E-01 |
| DPP3      | 11  | 1                  | 7.59E-01 | 1                  | 7.59E-01 | 1                  | 4.93E-01 | 1                  | 4.93E-01 |                    |          |                    |          |
| DGAT1     | 8   | 2                  | 3.93E-01 | 2                  | 3.93E-01 | 1                  | 4.93E-01 | 1                  | 4.93E-01 | 1                  | 6.52E-01 | 1                  | 6.52E-01 |
| CST7      | 20  | 1                  | 7.59E-01 | 1                  | 7.59E-01 | 1                  | 4.93E-01 | 1                  | 4.93E-01 |                    |          |                    |          |
| STRADB    | 2   | 1                  | 7.59E-01 | 1                  | 7.59E-01 | 1                  | 4.93E-01 | 1                  | 4.93E-01 |                    |          |                    |          |
| STK31     | 7   | 5                  | 4.43E-02 | 6                  | 4.40E-02 | 4                  | 5.28E-01 | 5                  | 5.40E-01 | 3                  | 4.93E-01 | 4                  | 4.93E-01 |
| EPB41L4B  | 9   | 4                  | 4.76E-01 | 5                  | 4.71E-01 | 4                  | 1.00E+00 | 5                  | 1.00E+00 | 1                  | 4.93E-01 | 2                  | 5.32E-01 |
| TSFM      | 12  | 4                  | 1.26E-01 | 4                  | 1.26E-01 | 4                  | 4.93E-01 | 4                  | 4.93E-01 |                    |          |                    |          |
| KIAA0408  | 6   | 1                  | 7.41E-01 | 1                  | 7.41E-01 | 1                  | 4.93E-01 | 1                  | 4.93E-01 |                    |          |                    |          |
| CIRBP     | 19  | 1                  | 7.41E-01 | 1                  | 7.41E-01 | 1                  | 4.93E-01 | 1                  | 4.93E-01 |                    |          |                    |          |
| OR1L4     | 9   | 1                  | 7.41E-01 | 1                  | 7.41E-01 | 1                  | 4.93E-01 | 1                  | 4.93E-01 |                    |          |                    |          |
| RELL1     | 4   | 1                  | 7.41E-01 | 1                  | 7.41E-01 | 1                  | 4.93E-01 | 1                  | 4.93E-01 |                    |          |                    |          |
| CABP2     | 11  | 1                  | 7.53E-01 | 1                  | 7.53E-01 | 1                  | 4.93E-01 | 1                  | 4.93E-01 |                    |          |                    |          |
| CAPN7     | 3   | 2                  | 3.53E-01 | 2                  | 3.53E-01 | 1                  | 4.93E-01 | 1                  | 4.93E-01 | 1                  | 6.68E-01 | 1                  | 6.68E-01 |
| GUCA1A    | 6   | 1                  | 7.53E-01 | 1                  | 7.53E-01 | 1                  | 4.93E-01 | 1                  | 4.93E-01 |                    |          |                    |          |
| PRKG1     | 10  | 1                  | 7.53E-01 | 1                  | 7.53E-01 | 1                  | 4.93E-01 | 1                  | 4.93E-01 |                    |          |                    |          |
| SYN3      | 22  | 2                  | 4.15E-01 | 2                  | 4.15E-01 | 1                  | 4.93E-01 | 1                  | 4.93E-01 | 1                  | 6.12E-01 | 1                  | 6.12E-01 |
| MUSK      | 9   | 1                  | 7.53E-01 | 1                  | 7.53E-01 | 1                  | 4.93E-01 | 1                  | 4.93E-01 |                    |          |                    |          |
| HIST1H2BA | 6   | 1                  | 7.53E-01 | 1                  | 7.53E-01 | 1                  | 4.93E-01 | 1                  | 4.93E-01 |                    |          |                    |          |
| FHIT      | 3   | 1                  | 7.53E-01 | 1                  | 7.53E-01 | 1                  | 4.93E-01 | 1                  | 4.93E-01 |                    |          |                    |          |
| PPP1R10   | 6   | 1                  | 7.53E-01 | 1                  | 7.53E-01 | 1                  | 4.93E-01 | 1                  | 4.93E-01 |                    |          |                    |          |
| ZBTB44    | 11  | 1                  | 7.53E-01 | 1                  | 7.53E-01 | 1                  | 4.93E-01 | 1                  | 4.93E-01 |                    |          |                    |          |
| FABP9     | 8   | 2                  | 7.38E-01 | 2                  | 7.38E-01 | 1                  | 4.94E-01 | 1                  | 4.94E-01 | 2                  | 6.39E-01 | 2                  | 6.39E-01 |
| P4HA3     | 11  | 4                  | 5.85E-01 | 5                  | 5.97E-01 | 3                  | 5.18E-01 | 4                  | 4.94E-01 | 1                  | 6.26E-01 | 2                  | 7.06E-01 |
| FBXL4     | 6   | 2                  | 4.11E-01 | 2                  | 4.11E-01 | 1                  | 4.94E-01 | 1                  | 4.94E-01 | 1                  | 6.52E-01 | 1                  | 6.52E-01 |
| DYDC1     | 10  | 1                  | 7.55E-01 | 1                  | 7.55E-01 | 1                  | 4.94E-01 | 1                  | 4.94E-01 |                    |          |                    |          |
| SERPINB9  | 6   | 1                  | 7.55E-01 | 1                  | 7.55E-01 | 1                  | 4.94E-01 | 1                  | 4.94E-01 |                    |          |                    |          |
| CYP19A1   | 15  | 1                  | 7.55E-01 | 1                  | 7.55E-01 | 1                  | 4.94E-01 | 1                  | 4.94E-01 |                    |          |                    |          |
| ZDHHC14   | 6   | 1                  | 7.33E-01 | 1                  | 7.33E-01 | 1                  | 4.94E-01 | 1                  | 4.94E-01 |                    |          |                    |          |
| SH3GL3    | 15  | 1                  | 7.33E-01 | 1                  | 7.33E-01 | 1                  | 4.94E-01 | 1                  | 4.94E-01 |                    |          |                    |          |
| CCDC184   | 12  | 1                  | 7.33E-01 | 1                  | 7.33E-01 | 1                  | 4.94E-01 | 1                  | 4.94E-01 |                    |          |                    |          |
| PRDM6     | 5   | 3                  | 5.76E-01 | 3                  | 5.76E-01 | 3                  | 4.94E-01 | 3                  | 4.94E-01 | 1                  | 6.48E-01 | 1                  | 6.48E-01 |
| OR2T11    | 1   | 1                  | 7.33E-01 | 1                  | 7.33E-01 | 1                  | 4.94E-01 | 1                  | 4.94E-01 |                    |          |                    |          |
| ASH1L     | 1   | 12                 | 2.03E-01 | 12                 | 2.03E-01 | 9                  | 4.94E-01 | 9                  | 4.94E-01 | 7                  | 6.62E-01 | 7                  | 6.62E-01 |
| CD27      | 12  | 1                  | 7.50E-01 | 1                  | 7.50E-01 | 1                  | 4.94E-01 | 1                  | 4.94E-01 |                    |          |                    |          |
| MLLT10    | 10  | 1                  | 7.46E-01 | 1                  | 7.46E-01 | 1                  | 4.94E-01 | 1                  | 4.94E-01 |                    |          |                    |          |
| NSUN6     | 10  | 1                  | 7.46E-01 | 1                  | 7.46E-01 | 1                  | 4.94E-01 | 1                  | 4.94E-01 |                    |          |                    |          |
| SPATS1    | 6   | 2                  | 2.71E-01 | 3                  | 2.74E-01 | 1                  | 4.94E-01 | 2                  | 4.95E-01 | 2                  | 6.36E-01 | 3                  | 6.30E-01 |
| PRR13     | 12  | 1                  | 7.46E-01 | 1                  | 7.46E-01 | 1                  | 4.94E-01 | 1                  | 4.94E-01 |                    |          |                    |          |

| SetID   | Chr | ADEH- vs NA        |          |                    |          | ADEH+ vs ADEH-     |          |                    |          | ADEH+ vs NA        |          |                    |          |
|---------|-----|--------------------|----------|--------------------|----------|--------------------|----------|--------------------|----------|--------------------|----------|--------------------|----------|
|         |     | rarenovel          |          | all                |          | rarenovel          |          | all                |          | rarenovel          |          | all                |          |
|         |     | N variants in test | p-value  | N variants in test | p-value  | N variants in test | p-value  | N variants in test | p-value  | N variants in test | p-value  | N variants in test | p-value  |
| RAB40C  | 16  | 1                  | 7.46E-01 | 1                  | 7.46E-01 | 1                  | 4.94E-01 | 1                  | 4.94E-01 |                    |          |                    |          |
| STK25   | 2   | 1                  | 7.46E-01 | 1                  | 7.46E-01 | 1                  | 4.94E-01 | 1                  | 4.94E-01 |                    |          |                    |          |
| POLR1B  | 2   | 6                  | 2.76E-01 | 6                  | 2.76E-01 | 3                  | 8.13E-01 | 3                  | 8.13E-01 | 3                  | 4.94E-01 | 3                  | 4.94E-01 |
| LGALS12 | 11  | 2                  | 4.98E-01 | 2                  | 4.98E-01 | 1                  | 4.94E-01 | 1                  | 4.94E-01 | 1                  | 6.30E-01 | 1                  | 6.30E-01 |
| AGMO    | 7   | 1                  | 6.34E-01 | 1                  | 6.34E-01 | 1                  | 4.94E-01 | 1                  | 4.94E-01 | 1                  | 6.89E-01 | 1                  | 6.89E-01 |
| SDR9C7  | 12  | 2                  | 2.70E-01 | 2                  | 2.70E-01 | 1                  | 4.94E-01 | 1                  | 4.94E-01 | 2                  | 6.48E-01 | 2                  | 6.48E-01 |
| SCG2    | 2   | 1                  | 7.41E-01 | 1                  | 7.41E-01 | 1                  | 4.94E-01 | 1                  | 4.94E-01 |                    |          |                    |          |
| POLDIP3 | 22  | 1                  | 7.41E-01 | 1                  | 7.41E-01 | 1                  | 4.94E-01 | 1                  | 4.94E-01 |                    |          |                    |          |
| EVI2B   | 17  | 1                  | 7.19E-01 | 1                  | 7.19E-01 | 1                  | 4.94E-01 | 1                  | 4.94E-01 |                    |          |                    |          |
| SOX9    | 17  | 1                  | 7.19E-01 | 1                  | 7.19E-01 | 1                  | 4.94E-01 | 1                  | 4.94E-01 |                    |          |                    |          |
| HSD17B2 | 16  | 3                  | 9.62E-02 | 3                  | 9.62E-02 | 1                  | 4.94E-01 | 1                  | 4.94E-01 | 2                  | 6.18E-01 | 2                  | 6.18E-01 |
| ANKFY1  | 17  | 1                  | 7.19E-01 | 1                  | 7.19E-01 | 1                  | 4.94E-01 | 1                  | 4.94E-01 |                    |          |                    |          |
| ACSBG2  | 19  | 1                  | 7.19E-01 | 1                  | 7.19E-01 | 1                  | 4.94E-01 | 1                  | 4.94E-01 |                    |          |                    |          |
| OR5B21  | 11  | 1                  | 7.19E-01 | 1                  | 7.19E-01 | 1                  | 4.94E-01 | 1                  | 4.94E-01 |                    |          |                    |          |
| SLC12A7 | 5   | 4                  | 2.32E-02 | 4                  | 2.32E-02 | 1                  | 4.94E-01 | 1                  | 4.94E-01 | 3                  | 4.95E-01 | 3                  | 4.95E-01 |
| LCN2    | 9   | 1                  | 7.19E-01 | 1                  | 7.19E-01 | 1                  | 4.94E-01 | 1                  | 4.94E-01 |                    |          |                    |          |
| MEIOC   | 17  | 4                  | 7.34E-01 | 4                  | 7.34E-01 | 3                  | 4.94E-01 | 3                  | 4.94E-01 | 3                  | 1.00E+00 | 3                  | 1.00E+00 |
| NIT2    | 3   | 4                  | 1.55E-01 | 4                  | 1.55E-01 | 4                  | 4.94E-01 | 4                  | 4.94E-01 |                    |          |                    |          |
| TRIM66  | 11  | 1                  | 7.39E-01 | 3                  | 7.19E-01 | 1                  | 4.94E-01 | 3                  | 1.00E+00 |                    |          | 2                  | 7.00E-01 |
| TRMT12  | 8   | 2                  | 4.29E-01 | 2                  | 4.29E-01 | 1                  | 4.94E-01 | 1                  | 4.94E-01 | 1                  | 6.38E-01 | 1                  | 6.38E-01 |
| TM2D3   | 15  | 1                  | 7.39E-01 | 1                  | 7.39E-01 | 1                  | 4.94E-01 | 1                  | 4.94E-01 |                    |          |                    |          |
| SAFB    | 19  | 1                  | 7.49E-01 | 1                  | 7.49E-01 | 1                  | 4.94E-01 | 1                  | 4.94E-01 |                    |          |                    |          |
| CFAP74  | 1   | 2                  | 4.00E-01 | 2                  | 4.00E-01 | 1                  | 4.94E-01 | 1                  | 4.94E-01 | 1                  | 6.11E-01 | 1                  | 6.11E-01 |
| OR11L1  | 1   | 2                  | 4.86E-01 | 2                  | 4.86E-01 | 1                  | 4.94E-01 | 1                  | 4.94E-01 | 1                  | 6.31E-01 | 1                  | 6.31E-01 |
| NUP35   | 2   | 1                  | 7.49E-01 | 1                  | 7.49E-01 | 1                  | 4.94E-01 | 1                  | 4.94E-01 |                    |          |                    |          |
| WDR36   | 5   | 1                  | 7.49E-01 | 1                  | 7.49E-01 | 1                  | 4.94E-01 | 1                  | 4.94E-01 |                    |          |                    |          |
| PRKAG2  | 7   | 1                  | 7.57E-01 | 1                  | 7.57E-01 | 1                  | 4.94E-01 | 1                  | 4.94E-01 |                    |          |                    |          |
| TMPPE   | 3   | 1                  | 7.57E-01 | 1                  | 7.57E-01 | 1                  | 4.94E-01 | 1                  | 4.94E-01 |                    |          |                    |          |
| NXN     | 17  | 1                  | 7.57E-01 | 1                  | 7.57E-01 | 1                  | 4.94E-01 | 1                  | 4.94E-01 |                    |          |                    |          |
| SNRPB2  | 20  | 1                  | 7.57E-01 | 1                  | 7.57E-01 | 1                  | 4.94E-01 | 1                  | 4.94E-01 |                    |          |                    |          |
| SUN3    | 7   | 1                  | 7.57E-01 | 1                  | 7.57E-01 | 1                  | 4.94E-01 | 1                  | 4.94E-01 |                    |          |                    |          |
| ELFN2   | 22  | 4                  | 1.49E-01 | 4                  | 1.49E-01 | 4                  | 4.95E-01 | 4                  | 4.95E-01 |                    |          |                    |          |
| CYP4F12 | 19  | 1                  | 7.08E-01 | 1                  | 7.08E-01 | 1                  | 4.95E-01 | 1                  | 4.95E-01 | 1                  | 6.98E-01 | 1                  | 6.98E-01 |
| FAM218A | 4   | 1                  | 7.45E-01 | 1                  | 7.45E-01 | 1                  | 4.95E-01 | 1                  | 4.95E-01 |                    |          |                    |          |
| CHIT1   | 1   | 4                  | 6.22E-02 | 5                  | 6.20E-02 | 1                  | 4.95E-01 | 2                  | 4.96E-01 | 3                  | 5.73E-01 | 4                  | 5.73E-01 |
| DHX8    | 17  | 1                  | 7.45E-01 | 1                  | 7.45E-01 | 1                  | 4.95E-01 | 1                  | 4.95E-01 |                    |          |                    |          |
| NCAM2   | 21  | 2                  | 4.20E-01 | 2                  | 4.20E-01 | 1                  | 4.95E-01 | 1                  | 4.95E-01 | 1                  | 6.22E-01 | 1                  | 6.22E-01 |
| HTR1E   | 6   | 3                  | 6.30E-03 | 3                  | 6.30E-03 |                    |          |                    |          | 3                  | 4.95E-01 | 3                  | 4.95E-01 |
| HSD3B1  | 1   | 1                  | 7.53E-01 | 1                  | 7.53E-01 | 1                  | 4.95E-01 | 1                  | 4.95E-01 |                    |          |                    |          |
| LITAF   | 16  | 2                  | 3.85E-01 | 2                  | 3.85E-01 | 1                  | 4.95E-01 | 1                  | 4.95E-01 | 1                  | 6.41E-01 | 1                  | 6.41E-01 |
| ZC3H4   | 19  | 6                  | 1.22E-01 | 6                  | 1.22E-01 | 6                  | 4.95E-01 | 6                  | 4.95E-01 |                    |          |                    |          |
| DKKL1   | 19  | 1                  | 7.55E-01 | 1                  | 7.55E-01 | 1                  | 4.95E-01 | 1                  | 4.95E-01 |                    |          |                    |          |
| PNLDC1  | 6   | 2                  | 3.71E-01 | 2                  | 3.71E-01 | 1                  | 4.95E-01 | 1                  | 4.95E-01 | 1                  | 6.04E-01 | 1                  | 6.04E-01 |
| LIMCH1  | 4   | 4                  | 4.80E-01 | 4                  | 4.80E-01 | 3                  | 4.95E-01 | 3                  | 4.95E-01 | 2                  | 6.18E-01 | 2                  | 6.18E-01 |
| CYP27B1 | 12  | 2                  | 4.46E-01 | 2                  | 4.46E-01 | 1                  | 4.95E-01 | 1                  | 4.95E-01 | 1                  | 6.46E-01 | 1                  | 6.46E-01 |
| OCSTAMP | 20  | 1                  | 7.45E-01 | 1                  | 7.45E-01 | 1                  | 4.95E-01 | 1                  | 4.95E-01 |                    |          |                    |          |
| ELL2    | 5   | 1                  | 7.45E-01 | 1                  | 7.45E-01 | 1                  | 4.95E-01 | 1                  | 4.95E-01 |                    |          |                    |          |
| MINK1   | 17  | 2                  | 5.36E-01 | 2                  | 5.36E-01 | 1                  | 4.95E-01 | 1                  | 4.95E-01 | 1                  | 6.34E-01 | 1                  | 6.34E-01 |

| SetID     | Chr | ADEH- vs NA        |          |                    |          | ADEH+ vs ADEH-     |          |                    |          | ADEH+ vs NA        |          |                    |          |
|-----------|-----|--------------------|----------|--------------------|----------|--------------------|----------|--------------------|----------|--------------------|----------|--------------------|----------|
|           |     | rarenovel          |          | all                |          | rarenovel          |          | all                |          | rarenovel          |          | all                |          |
|           |     | N variants in test | p-value  | N variants in test | p-value  | N variants in test | p-value  | N variants in test | p-value  | N variants in test | p-value  | N variants in test | p-value  |
| BRD7      | 16  | 1                  | 7.45E-01 | 1                  | 7.45E-01 | 1                  | 4.95E-01 | 1                  | 4.95E-01 |                    |          |                    |          |
| RBM14     | 11  | 1                  | 7.45E-01 | 1                  | 7.45E-01 | 1                  | 4.95E-01 | 1                  | 4.95E-01 |                    |          |                    |          |
| C3orf58   | 3   | 2                  | 4.22E-01 | 2                  | 4.22E-01 | 1                  | 4.95E-01 | 1                  | 4.95E-01 | 1                  | 6.04E-01 | 1                  | 6.04E-01 |
| RAB8B     | 15  | 2                  | 4.03E-01 | 2                  | 4.03E-01 | 1                  | 4.95E-01 | 1                  | 4.95E-01 | 1                  | 5.73E-01 | 1                  | 5.73E-01 |
| ETHE1     | 19  | 1                  | 7.45E-01 | 1                  | 7.45E-01 | 1                  | 4.95E-01 | 1                  | 4.95E-01 |                    |          |                    |          |
| RMND5B    | 5   | 1                  | 6.72E-01 | 1                  | 6.72E-01 | 1                  | 4.95E-01 | 1                  | 4.95E-01 | 1                  | 6.28E-01 | 1                  | 6.28E-01 |
| TSPAN17   | 5   | 2                  | 3.18E-01 | 2                  | 3.18E-01 | 1                  | 4.95E-01 | 1                  | 4.95E-01 | 1                  | 6.57E-01 | 1                  | 6.57E-01 |
| CTU1      | 19  | 1                  | 7.56E-01 | 1                  | 7.56E-01 | 1                  | 4.95E-01 | 1                  | 4.95E-01 |                    |          |                    |          |
| FAM205C   | 9   | 1                  | 7.56E-01 | 1                  | 7.56E-01 | 1                  | 4.95E-01 | 1                  | 4.95E-01 |                    |          |                    |          |
| FARS2     | 6   | 1                  | 7.56E-01 | 1                  | 7.56E-01 | 1                  | 4.95E-01 | 1                  | 4.95E-01 |                    |          |                    |          |
| HPCAL4    | 1   | 1                  | 7.56E-01 | 1                  | 7.56E-01 | 1                  | 4.95E-01 | 1                  | 4.95E-01 |                    |          |                    |          |
| HS6ST3    | 13  | 1                  | 7.54E-01 | 1                  | 7.54E-01 | 1                  | 4.95E-01 | 1                  | 4.95E-01 |                    |          |                    |          |
| DGKA      | 12  | 1                  | 7.54E-01 | 1                  | 7.54E-01 | 1                  | 4.95E-01 | 1                  | 4.95E-01 |                    |          |                    |          |
| SYMPK     | 19  | 1                  | 7.54E-01 | 1                  | 7.54E-01 | 1                  | 4.95E-01 | 1                  | 4.95E-01 |                    |          |                    |          |
| MLANA     | 9   | 1                  | 7.54E-01 | 1                  | 7.54E-01 | 1                  | 4.95E-01 | 1                  | 4.95E-01 |                    |          |                    |          |
| SHISA3    | 4   | 1                  | 7.54E-01 | 1                  | 7.54E-01 | 1                  | 4.95E-01 | 1                  | 4.95E-01 |                    |          |                    |          |
| MEIOB     | 16  | 1                  | 7.51E-01 | 1                  | 7.51E-01 | 1                  | 4.95E-01 | 1                  | 4.95E-01 |                    |          |                    |          |
| ZNF613    | 19  | 2                  | 2.89E-01 | 2                  | 2.89E-01 | 1                  | 4.95E-01 | 1                  | 4.95E-01 | 2                  | 6.27E-01 | 2                  | 6.27E-01 |
| TNPO3     | 7   | 1                  | 7.51E-01 | 1                  | 7.51E-01 | 1                  | 4.95E-01 | 1                  | 4.95E-01 |                    |          |                    |          |
| RTN4R     | 22  | 2                  | 5.05E-01 | 2                  | 5.05E-01 | 1                  | 4.95E-01 | 1                  | 4.95E-01 | 1                  | 6.69E-01 | 1                  | 6.69E-01 |
| NPPA      | 1   |                    |          | 1                  | 2.42E-02 |                    |          | 1                  | 6.63E-01 |                    |          | 1                  | 4.95E-01 |
| SIK1      | 21  | 1                  | 7.42E-01 | 1                  | 7.42E-01 | 1                  | 4.95E-01 | 1                  | 4.95E-01 |                    |          |                    |          |
| SNX10     | 7   | 2                  | 4.19E-01 | 2                  | 4.19E-01 | 1                  | 4.95E-01 | 1                  | 4.95E-01 | 1                  | 6.27E-01 | 1                  | 6.27E-01 |
| PTPRD     | 9   | 7                  | 3.45E-01 | 7                  | 3.45E-01 | 4                  | 6.18E-01 | 4                  | 6.18E-01 | 3                  | 4.96E-01 | 3                  | 4.96E-01 |
| TNFSF15   | 9   | 1                  | 7.51E-01 | 1                  | 7.51E-01 | 1                  | 4.96E-01 | 1                  | 4.96E-01 |                    |          |                    |          |
| ZYX       | 7   | 3                  | 1.44E-01 | 3                  | 1.44E-01 | 1                  | 4.96E-01 | 1                  | 4.96E-01 | 2                  | 6.34E-01 | 2                  | 6.34E-01 |
| FAM134B   | 5   | 2                  | 4.33E-01 | 2                  | 4.33E-01 | 1                  | 4.96E-01 | 1                  | 4.96E-01 | 1                  | 6.58E-01 | 1                  | 6.58E-01 |
| C19orf45  | 19  | 1                  | 7.51E-01 | 1                  | 7.51E-01 | 1                  | 4.96E-01 | 1                  | 4.96E-01 |                    |          |                    |          |
| BRCA1     | 17  | 5                  | 7.74E-01 | 6                  | 8.75E-01 | 3                  | 5.55E-01 | 4                  | 6.29E-01 | 3                  | 4.96E-01 | 4                  | 6.83E-01 |
| FAM53A    | 4   | 4                  | 3.76E-01 | 4                  | 3.76E-01 | 3                  | 1.00E+00 | 3                  | 1.00E+00 | 4                  | 4.96E-01 | 4                  | 4.96E-01 |
| MAFA      | 8   | 1                  | 2.38E-01 | 2                  | 7.61E-01 |                    |          | 1                  | 4.96E-01 | 1                  | 5.28E-01 | 2                  | 5.23E-01 |
| KRTAP13-2 | 21  |                    |          | 1                  | 6.17E-01 |                    |          | 1                  | 5.85E-01 |                    |          | 1                  | 4.96E-01 |
| CD2AP     | 6   | 2                  | 3.82E-01 | 2                  | 3.82E-01 | 1                  | 4.96E-01 | 1                  | 4.96E-01 | 1                  | 6.44E-01 | 1                  | 6.44E-01 |
| FBXO42    | 1   | 1                  | 7.52E-01 | 1                  | 7.52E-01 | 1                  | 4.96E-01 | 1                  | 4.96E-01 |                    |          |                    |          |
| GLIPR1L1  | 12  | 1                  | 7.52E-01 | 1                  | 7.52E-01 | 1                  | 4.96E-01 | 1                  | 4.96E-01 |                    |          |                    |          |
| ATP6V0B   | 1   | 1                  | 7.52E-01 | 1                  | 7.52E-01 | 1                  | 4.96E-01 | 1                  | 4.96E-01 |                    |          |                    |          |
| IL17A     | 6   | 2                  | 3.03E-01 | 2                  | 3.03E-01 | 1                  | 4.97E-01 | 1                  | 4.97E-01 | 2                  | 6.33E-01 | 2                  | 6.33E-01 |
| SIMC1     | 5   | 3                  | 1.53E-01 | 3                  | 1.53E-01 | 1                  | 4.97E-01 | 1                  | 4.97E-01 | 2                  | 6.68E-01 | 2                  | 6.68E-01 |
| HOXB4     | 17  | 1                  | 7.58E-01 | 1                  | 7.58E-01 | 1                  | 4.97E-01 | 1                  | 4.97E-01 |                    |          |                    |          |
| HIST1H3E  | 6   | 2                  | 3.56E-01 | 2                  | 3.56E-01 | 1                  | 4.97E-01 | 1                  | 4.97E-01 | 1                  | 6.49E-01 | 1                  | 6.49E-01 |
| BTBD9     | 6   | 1                  | 7.58E-01 | 1                  | 7.58E-01 | 1                  | 4.97E-01 | 1                  | 4.97E-01 |                    |          |                    |          |
| NECAP1    | 12  | 1                  | 7.58E-01 | 1                  | 7.58E-01 | 1                  | 4.97E-01 | 1                  | 4.97E-01 |                    |          |                    |          |
| TLR9      | 3   | 1                  | 7.58E-01 | 1                  | 7.58E-01 | 1                  | 4.97E-01 | 1                  | 4.97E-01 |                    |          |                    |          |
| TANC1     | 2   | 7                  | 4.49E-01 | 7                  | 4.49E-01 | 6                  | 4.97E-01 | 6                  | 4.97E-01 | 1                  | 5.93E-01 | 1                  | 5.93E-01 |
| DCST1     | 1   | 1                  | 7.57E-01 | 1                  | 7.57E-01 | 1                  | 4.97E-01 | 1                  | 4.97E-01 |                    |          |                    |          |
| QRFP      | 9   | 1                  | 7.57E-01 | 1                  | 7.57E-01 | 1                  | 4.97E-01 | 1                  | 4.97E-01 |                    |          |                    |          |
| GLDC      | 9   | 2                  | 2.92E-01 | 2                  | 2.92E-01 | 1                  | 4.97E-01 | 1                  | 4.97E-01 | 1                  | 5.69E-01 | 1                  | 5.69E-01 |
| ALG3      | 3   | 1                  | 7.57E-01 | 1                  | 7.57E-01 | 1                  | 4.97E-01 | 1                  | 4.97E-01 |                    |          |                    |          |

| SetID    | Chr | ADEH- vs NA        |          |                    |          | ADEH+ vs ADEH-     |          |                    |          | ADEH+ vs NA        |          |                    |          |
|----------|-----|--------------------|----------|--------------------|----------|--------------------|----------|--------------------|----------|--------------------|----------|--------------------|----------|
|          |     | rare novel         |          | all                |          | rare novel         |          | all                |          | rare novel         |          | all                |          |
|          |     | N variants in test | p-value  | N variants in test | p-value  | N variants in test | p-value  | N variants in test | p-value  | N variants in test | p-value  | N variants in test | p-value  |
| SPRED1   | 15  | 3                  | 9.92E-02 | 3                  | 9.92E-02 | 1                  | 4.97E-01 | 1                  | 4.97E-01 | 2                  | 6.51E-01 | 2                  | 6.51E-01 |
| DOK3     | 5   | 2                  | 2.65E-01 | 2                  | 2.65E-01 | 1                  | 4.97E-01 | 1                  | 4.97E-01 | 1                  | 6.16E-01 | 1                  | 6.16E-01 |
| INTS1    | 7   | 2                  | 3.38E-01 | 2                  | 3.38E-01 | 1                  | 4.97E-01 | 1                  | 4.97E-01 | 1                  | 6.33E-01 | 1                  | 6.33E-01 |
| DNAJB7   | 22  | 1                  | 7.57E-01 | 1                  | 7.57E-01 | 1                  | 4.97E-01 | 1                  | 4.97E-01 |                    |          |                    |          |
| PLL      | 16  | 2                  | 4.31E-01 | 2                  | 4.31E-01 | 1                  | 4.97E-01 | 1                  | 4.97E-01 | 1                  | 6.50E-01 | 1                  | 6.50E-01 |
| FMO5     | 1   | 1                  | 2.30E-01 | 1                  | 2.30E-01 | 1                  | 4.97E-01 | 1                  | 4.97E-01 |                    |          |                    |          |
| VENTX    | 10  | 1                  | 7.56E-01 | 1                  | 7.56E-01 | 1                  | 4.97E-01 | 1                  | 4.97E-01 |                    |          |                    |          |
| KIAA1456 | 8   | 1                  | 7.56E-01 | 1                  | 7.56E-01 | 1                  | 4.97E-01 | 1                  | 4.97E-01 |                    |          |                    |          |
| ARMC7    | 17  | 1                  | 7.56E-01 | 1                  | 7.56E-01 | 1                  | 4.97E-01 | 1                  | 4.97E-01 |                    |          |                    |          |
| FRAT2    | 10  | 2                  | 4.64E-01 | 2                  | 4.64E-01 | 1                  | 4.97E-01 | 1                  | 4.97E-01 | 1                  | 6.18E-01 | 1                  | 6.18E-01 |
| MUC22    | 6   | 1                  | 7.56E-01 | 1                  | 7.56E-01 | 1                  | 4.97E-01 | 1                  | 4.97E-01 |                    |          |                    |          |
| AJAP1    | 1   | 1                  | 7.56E-01 | 1                  | 7.56E-01 | 1                  | 4.97E-01 | 1                  | 4.97E-01 |                    |          |                    |          |
| ESRRB    | 14  | 1                  | 7.42E-01 | 1                  | 7.42E-01 | 1                  | 4.97E-01 | 1                  | 4.97E-01 |                    |          |                    |          |
| HELLS    | 10  | 1                  | 7.42E-01 | 1                  | 7.42E-01 | 1                  | 4.97E-01 | 1                  | 4.97E-01 |                    |          |                    |          |
| DDX43    | 6   | 2                  | 4.43E-01 | 2                  | 4.43E-01 | 1                  | 4.97E-01 | 1                  | 4.97E-01 | 1                  | 6.30E-01 | 1                  | 6.30E-01 |
| FAM43B   | 1   | 1                  | 7.42E-01 | 1                  | 7.42E-01 | 1                  | 4.97E-01 | 1                  | 4.97E-01 |                    |          |                    |          |
| REEP6    | 19  | 1                  | 7.42E-01 | 1                  | 7.42E-01 | 1                  | 4.97E-01 | 1                  | 4.97E-01 |                    |          |                    |          |
| NKX3-2   | 4   | 1                  | 7.48E-01 | 1                  | 7.48E-01 | 1                  | 4.97E-01 | 1                  | 4.97E-01 |                    |          |                    |          |
| ZNF296   | 19  | 2                  | 3.91E-01 | 2                  | 3.91E-01 | 1                  | 4.97E-01 | 1                  | 4.97E-01 | 1                  | 6.44E-01 | 1                  | 6.44E-01 |
| PLEKHF2  | 8   | 2                  | 3.84E-01 | 2                  | 3.84E-01 | 1                  | 4.97E-01 | 1                  | 4.97E-01 | 1                  | 6.44E-01 | 1                  | 6.44E-01 |
| USP4     | 3   | 3                  | 1.61E-01 | 3                  | 1.61E-01 | 3                  | 4.97E-01 | 3                  | 4.97E-01 |                    |          |                    |          |
| SENP8    | 15  | 1                  | 7.61E-01 | 1                  | 7.61E-01 | 1                  | 4.98E-01 | 1                  | 4.98E-01 |                    |          |                    |          |
| AEN      | 15  | 1                  | 7.61E-01 | 1                  | 7.61E-01 | 1                  | 4.98E-01 | 1                  | 4.98E-01 |                    |          |                    |          |
| FAM149B1 | 10  | 3                  | 1.17E-01 | 3                  | 1.17E-01 | 1                  | 4.98E-01 | 1                  | 4.98E-01 | 2                  | 6.43E-01 | 2                  | 6.43E-01 |
| ITGB7    | 12  | 2                  | 4.68E-01 | 2                  | 4.68E-01 | 1                  | 4.98E-01 | 1                  | 4.98E-01 | 1                  | 5.77E-01 | 1                  | 5.77E-01 |
| TBL2     | 7   | 2                  | 3.05E-01 | 3                  | 6.27E-01 | 1                  | 4.98E-01 | 2                  | 5.48E-01 | 1                  | 6.82E-01 | 2                  | 1.00E+00 |
| SESN3    | 11  | 1                  | 7.61E-01 | 1                  | 7.61E-01 | 1                  | 4.98E-01 | 1                  | 4.98E-01 |                    |          |                    |          |
| TTC17    | 11  | 4                  | 4.82E-02 | 4                  | 4.82E-02 | 1                  | 5.27E-01 | 1                  | 5.27E-01 | 3                  | 4.98E-01 | 3                  | 4.98E-01 |
| C10orf2  | 10  | 1                  | 7.52E-01 | 1                  | 7.52E-01 | 1                  | 4.98E-01 | 1                  | 4.98E-01 |                    |          |                    |          |
| ADHFE1   | 8   | 2                  | 3.70E-01 | 2                  | 3.70E-01 | 1                  | 4.98E-01 | 1                  | 4.98E-01 | 1                  | 6.09E-01 | 1                  | 6.09E-01 |
| TM9SF3   | 10  | 1                  | 7.52E-01 | 1                  | 7.52E-01 | 1                  | 4.98E-01 | 1                  | 4.98E-01 |                    |          |                    |          |
| RAPGEF1  | 9   | 1                  | 7.52E-01 | 1                  | 7.52E-01 | 1                  | 4.98E-01 | 1                  | 4.98E-01 |                    |          |                    |          |
| MS4A3    | 11  | 1                  | 7.52E-01 | 1                  | 7.52E-01 | 1                  | 4.98E-01 | 1                  | 4.98E-01 |                    |          |                    |          |
| GALNT10  | 5   | 1                  | 7.52E-01 | 1                  | 7.52E-01 | 1                  | 4.98E-01 | 1                  | 4.98E-01 |                    |          |                    |          |
| SERTAD2  | 2   | 1                  | 7.52E-01 | 1                  | 7.52E-01 | 1                  | 4.98E-01 | 1                  | 4.98E-01 |                    |          |                    |          |
| ADD1     | 4   | 2                  | 3.43E-01 | 2                  | 3.43E-01 | 1                  | 4.98E-01 | 1                  | 4.98E-01 | 1                  | 6.13E-01 | 1                  | 6.13E-01 |
| MUC1     | 1   | 1                  | 7.55E-01 | 1                  | 7.55E-01 | 1                  | 4.98E-01 | 1                  | 4.98E-01 |                    |          |                    |          |
| FLCN     | 17  | 1                  | 7.55E-01 | 1                  | 7.55E-01 | 1                  | 4.98E-01 | 1                  | 4.98E-01 |                    |          |                    |          |
| ROM1     | 11  | 1                  | 7.55E-01 | 1                  | 7.55E-01 | 1                  | 4.98E-01 | 1                  | 4.98E-01 |                    |          |                    |          |
| MRPL32   | 7   | 2                  | 3.85E-01 | 2                  | 3.85E-01 | 1                  | 4.98E-01 | 1                  | 4.98E-01 | 1                  | 6.25E-01 | 1                  | 6.25E-01 |
| XRCC5    | 2   | 1                  | 7.55E-01 | 1                  | 7.55E-01 | 1                  | 4.98E-01 | 1                  | 4.98E-01 |                    |          |                    |          |
| ANKRD13A | 12  | 1                  | 6.72E-01 | 1                  | 6.72E-01 | 1                  | 4.98E-01 | 1                  | 4.98E-01 | 1                  | 6.68E-01 | 1                  | 6.68E-01 |
| GRIA2    | 4   | 1                  | 7.55E-01 | 1                  | 7.55E-01 | 1                  | 4.98E-01 | 1                  | 4.98E-01 |                    |          |                    |          |
| RFC4     | 3   | 1                  | 7.55E-01 | 1                  | 7.55E-01 | 1                  | 4.98E-01 | 1                  | 4.98E-01 |                    |          |                    |          |
| SLC24A4  | 14  | 3                  | 6.93E-02 | 3                  | 6.93E-02 | 2                  | 1.00E+00 | 2                  | 1.00E+00 | 3                  | 4.98E-01 | 3                  | 4.98E-01 |
| BPIFA3   | 20  | 2                  | 4.18E-01 | 2                  | 4.18E-01 | 1                  | 4.98E-01 | 1                  | 4.98E-01 | 1                  | 5.99E-01 | 1                  | 5.99E-01 |
| PCDHGA2  | 5   | 3                  | 1.19E-01 | 3                  | 1.19E-01 | 1                  | 4.98E-01 | 1                  | 4.98E-01 | 2                  | 6.32E-01 | 2                  | 6.32E-01 |
| PHLDA2   | 11  | 2                  | 5.31E-01 | 2                  | 5.31E-01 | 1                  | 4.98E-01 | 1                  | 4.98E-01 | 1                  | 6.42E-01 | 1                  | 6.42E-01 |

| SetID    | Chr | ADEH- vs NA        |          |                    |          | ADEH+ vs ADEH-     |          |                    |          | ADEH+ vs NA        |          |                    |          |
|----------|-----|--------------------|----------|--------------------|----------|--------------------|----------|--------------------|----------|--------------------|----------|--------------------|----------|
|          |     | rarenovel          |          | all                |          | rarenovel          |          | all                |          | rarenovel          |          | all                |          |
|          |     | N variants in test | p-value  | N variants in test | p-value  | N variants in test | p-value  | N variants in test | p-value  | N variants in test | p-value  | N variants in test | p-value  |
| TNF      | 6   | 1                  | 7.47E-01 | 1                  | 7.47E-01 | 1                  | 4.98E-01 | 1                  | 4.98E-01 |                    |          |                    |          |
| UBE2U    | 1   | 1                  | 7.47E-01 | 1                  | 7.47E-01 | 1                  | 4.98E-01 | 1                  | 4.98E-01 |                    |          |                    |          |
| MOB3B    | 9   | 1                  | 7.47E-01 | 1                  | 7.47E-01 | 1                  | 4.98E-01 | 1                  | 4.98E-01 |                    |          |                    |          |
| SERINC4  | 15  | 1                  | 7.58E-01 | 1                  | 7.58E-01 | 1                  | 4.98E-01 | 1                  | 4.98E-01 |                    |          |                    |          |
| SHD      | 19  | 1                  | 7.58E-01 | 1                  | 7.58E-01 | 1                  | 4.98E-01 | 1                  | 4.98E-01 |                    |          |                    |          |
| FBXO24   | 7   | 2                  | 6.31E-01 | 2                  | 6.31E-01 | 1                  | 4.98E-01 | 1                  | 4.98E-01 | 1                  | 5.28E-01 | 1                  | 5.28E-01 |
| CD300A   | 17  | 1                  | 7.58E-01 | 1                  | 7.58E-01 | 1                  | 4.98E-01 | 1                  | 4.98E-01 |                    |          |                    |          |
| TMEM231  | 16  | 1                  | 7.58E-01 | 1                  | 7.58E-01 | 1                  | 4.98E-01 | 1                  | 4.98E-01 |                    |          |                    |          |
| DNALI1   | 1   | 3                  | 2.91E-01 | 3                  | 2.91E-01 | 2                  | 4.98E-01 | 2                  | 4.98E-01 | 1                  | 6.44E-01 | 1                  | 6.44E-01 |
| ZNF438   | 10  | 2                  | 5.01E-01 | 2                  | 5.01E-01 | 1                  | 4.98E-01 | 1                  | 4.98E-01 | 1                  | 6.12E-01 | 1                  | 6.12E-01 |
| NEK6     | 9   | 1                  | 7.55E-01 | 1                  | 7.55E-01 | 1                  | 4.98E-01 | 1                  | 4.98E-01 |                    |          |                    |          |
| GCNT2    | 6   | 1                  | 7.55E-01 | 1                  | 7.55E-01 | 1                  | 4.98E-01 | 1                  | 4.98E-01 |                    |          |                    |          |
| IL18R1   | 2   | 1                  | 7.55E-01 | 1                  | 7.55E-01 | 1                  | 4.98E-01 | 1                  | 4.98E-01 |                    |          |                    |          |
| AKAP5    | 14  | 1                  | 7.55E-01 | 1                  | 7.55E-01 | 1                  | 4.98E-01 | 1                  | 4.98E-01 |                    |          |                    |          |
| MMP24    | 20  | 1                  | 7.55E-01 | 1                  | 7.55E-01 | 1                  | 4.98E-01 | 1                  | 4.98E-01 |                    |          |                    |          |
| C17orf99 | 17  | 1                  | 7.28E-01 | 1                  | 7.28E-01 | 1                  | 4.98E-01 | 1                  | 4.98E-01 | 1                  | 6.17E-01 | 1                  | 6.17E-01 |
| COL8A1   | 3   | 1                  | 7.55E-01 | 1                  | 7.55E-01 | 1                  | 4.98E-01 | 1                  | 4.98E-01 |                    |          |                    |          |
| RAMP3    | 7   | 1                  | 7.55E-01 | 2                  | 6.96E-01 | 1                  | 4.98E-01 | 2                  | 1.00E+00 |                    |          | 1                  | 1.00E+00 |
| RNF187   | 1   | 1                  | 7.56E-01 | 1                  | 7.56E-01 | 1                  | 4.98E-01 | 1                  | 4.98E-01 |                    |          |                    |          |
| HRSP12   | 8   | 1                  | 7.52E-01 | 1                  | 7.52E-01 | 1                  | 4.99E-01 | 1                  | 4.99E-01 |                    |          |                    |          |
| DNAJC16  | 1   | 3                  | 1.10E-01 | 3                  | 1.10E-01 | 1                  | 4.99E-01 | 1                  | 4.99E-01 | 2                  | 6.46E-01 | 2                  | 6.46E-01 |
| ICAM5    | 19  | 2                  | 1.23E-01 | 2                  | 1.23E-01 | 2                  | 4.99E-01 | 2                  | 4.99E-01 |                    |          |                    |          |
| MAP7     | 6   | 6                  | 1.21E-01 | 6                  | 1.21E-01 | 6                  | 4.99E-01 | 6                  | 4.99E-01 |                    |          |                    |          |
| FAM200B  | 4   | 4                  | 1.95E-01 | 5                  | 3.15E-01 | 4                  | 5.14E-01 | 5                  | 4.99E-01 |                    |          | 1                  | 6.89E-01 |
| GP6      | 19  | 3                  | 1.00E+00 | 3                  | 1.00E+00 | 3                  | 5.00E-01 | 3                  | 5.00E-01 | 2                  | 4.99E-01 | 2                  | 4.99E-01 |
| PRR14    | 16  | 3                  | 1.42E-01 | 3                  | 1.42E-01 | 1                  | 4.99E-01 | 1                  | 4.99E-01 | 2                  | 6.23E-01 | 2                  | 6.23E-01 |
| RABL6    | 9   | 2                  | 3.19E-01 | 2                  | 3.19E-01 | 1                  | 4.99E-01 | 1                  | 4.99E-01 | 1                  | 5.92E-01 | 1                  | 5.92E-01 |
| ZER1     | 9   | 2                  | 4.24E-01 | 2                  | 4.24E-01 | 1                  | 4.99E-01 | 1                  | 4.99E-01 | 1                  | 5.88E-01 | 1                  | 5.88E-01 |
| BMPR1A   | 10  | 1                  | 7.39E-01 | 1                  | 7.39E-01 | 1                  | 4.99E-01 | 1                  | 4.99E-01 | 1                  | 5.93E-01 | 1                  | 5.93E-01 |
| COL13A1  | 10  | 1                  | 7.61E-01 | 1                  | 7.61E-01 | 1                  | 4.99E-01 | 1                  | 4.99E-01 |                    |          |                    |          |
| DDIT4    | 10  | 1                  | 7.61E-01 | 1                  | 7.61E-01 | 1                  | 4.99E-01 | 1                  | 4.99E-01 |                    |          |                    |          |
| PSIP1    | 9   | 1                  | 7.61E-01 | 1                  | 7.61E-01 | 1                  | 4.99E-01 | 1                  | 4.99E-01 |                    |          |                    |          |
| XPA      | 9   | 1                  | 7.61E-01 | 1                  | 7.61E-01 | 1                  | 4.99E-01 | 1                  | 4.99E-01 |                    |          |                    |          |
| IFI30    | 19  | 1                  | 7.56E-01 | 1                  | 7.56E-01 | 1                  | 4.99E-01 | 1                  | 4.99E-01 |                    |          |                    |          |
| LMOD1    | 1   | 1                  | 7.56E-01 | 1                  | 7.56E-01 | 1                  | 4.99E-01 | 1                  | 4.99E-01 |                    |          |                    |          |
| ZNF14    | 19  | 2                  | 5.09E-01 | 2                  | 5.09E-01 | 1                  | 4.99E-01 | 1                  | 4.99E-01 | 1                  | 6.42E-01 | 1                  | 6.42E-01 |
| PRMT5    | 14  | 1                  | 7.56E-01 | 1                  | 7.56E-01 | 1                  | 4.99E-01 | 1                  | 4.99E-01 |                    |          |                    |          |
| DDX39A   | 19  | 1                  | 7.56E-01 | 1                  | 7.56E-01 | 1                  | 4.99E-01 | 1                  | 4.99E-01 |                    |          |                    |          |
| RBMS1    | 2   | 1                  | 7.56E-01 | 1                  | 7.56E-01 | 1                  | 4.99E-01 | 1                  | 4.99E-01 |                    |          |                    |          |
| RTP3     | 3   | 1                  | 7.56E-01 | 1                  | 7.56E-01 | 1                  | 4.99E-01 | 1                  | 4.99E-01 |                    |          |                    |          |
| NTN4     | 12  | 1                  | 4.06E-01 | 1                  | 4.06E-01 | 1                  | 4.99E-01 | 1                  | 4.99E-01 |                    |          |                    |          |
| ARID2    | 12  | 5                  | 4.56E-01 | 5                  | 4.56E-01 | 3                  | 1.00E+00 | 3                  | 1.00E+00 | 4                  | 4.99E-01 | 4                  | 4.99E-01 |
| ASB17    | 1   | 1                  | 7.53E-01 | 1                  | 7.53E-01 | 1                  | 4.99E-01 | 1                  | 4.99E-01 |                    |          |                    |          |
| SPRED2   | 2   | 2                  | 4.47E-01 | 2                  | 4.47E-01 | 1                  | 4.99E-01 | 1                  | 4.99E-01 | 1                  | 6.60E-01 | 1                  | 6.60E-01 |
| DHX16    | 6   | 3                  | 9.57E-02 | 3                  | 9.57E-02 | 1                  | 4.99E-01 | 1                  | 4.99E-01 | 2                  | 6.47E-01 | 2                  | 6.47E-01 |
| RNF183   | 9   | 1                  | 7.53E-01 | 1                  | 7.53E-01 | 1                  | 4.99E-01 | 1                  | 4.99E-01 |                    |          |                    |          |
| C21orf62 | 21  | 1                  | 7.53E-01 | 1                  | 7.53E-01 | 1                  | 4.99E-01 | 1                  | 4.99E-01 |                    |          |                    |          |
| GPATCH1  | 19  | 1                  | 7.53E-01 | 1                  | 7.53E-01 | 1                  | 4.99E-01 | 1                  | 4.99E-01 |                    |          |                    |          |



| SetID    | Chr | ADEH- vs NA        |          |                    |          | ADEH+ vs ADEH-     |          |                    |          | ADEH+ vs NA        |          |                    |          |
|----------|-----|--------------------|----------|--------------------|----------|--------------------|----------|--------------------|----------|--------------------|----------|--------------------|----------|
|          |     | rarenovel          |          | all                |          | rarenovel          |          | all                |          | rarenovel          |          | all                |          |
|          |     | N variants in test | p-value  | N variants in test | p-value  | N variants in test | p-value  | N variants in test | p-value  | N variants in test | p-value  | N variants in test | p-value  |
| TRIM62   | 1   | 1                  | 7.53E-01 | 1                  | 7.53E-01 | 1                  | 4.99E-01 | 1                  | 4.99E-01 |                    |          |                    |          |
| NLRP1    | 17  | 8                  | 1.00E+00 | 8                  | 1.00E+00 | 7                  | 6.76E-01 | 7                  | 6.76E-01 | 5                  | 5.00E-01 | 5                  | 5.00E-01 |
| CTSB     | 8   | 6                  | 8.52E-01 | 6                  | 8.52E-01 | 4                  | 5.14E-01 | 4                  | 5.14E-01 | 3                  | 5.00E-01 | 3                  | 5.00E-01 |
| FAM71A   | 1   | 4                  | 5.29E-01 | 4                  | 5.29E-01 | 4                  | 5.52E-01 | 4                  | 5.52E-01 | 3                  | 5.00E-01 | 3                  | 5.00E-01 |
| LMNTD2   | 11  | 3                  | 7.18E-01 | 4                  | 1.87E-01 | 2                  | 6.14E-01 | 3                  | 8.85E-01 | 2                  | 6.25E-01 | 3                  | 5.00E-01 |
| SEMA7A   | 15  | 1                  | 7.53E-01 | 1                  | 7.53E-01 | 1                  | 5.00E-01 | 1                  | 5.00E-01 |                    |          |                    |          |
| NAA25    | 12  | 2                  | 3.62E-01 | 2                  | 3.62E-01 | 1                  | 5.00E-01 | 1                  | 5.00E-01 | 1                  | 6.37E-01 | 1                  | 6.37E-01 |
| PANX1    | 11  | 1                  | 7.53E-01 | 1                  | 7.53E-01 | 1                  | 5.00E-01 | 1                  | 5.00E-01 |                    |          |                    |          |
| TBC1D22B | 6   | 1                  | 7.53E-01 | 1                  | 7.53E-01 | 1                  | 5.00E-01 | 1                  | 5.00E-01 |                    |          |                    |          |
| PWP1     | 12  | 2                  | 2.23E-01 | 2                  | 2.23E-01 | 1                  | 5.00E-01 | 1                  | 5.00E-01 | 2                  | 6.40E-01 | 2                  | 6.40E-01 |
| RSPO2    | 8   | 1                  | 7.52E-01 | 1                  | 7.52E-01 | 1                  | 5.00E-01 | 1                  | 5.00E-01 |                    |          |                    |          |
| VCAM1    | 1   | 1                  | 7.52E-01 | 1                  | 7.52E-01 | 1                  | 5.00E-01 | 1                  | 5.00E-01 |                    |          |                    |          |
| TPI1     | 12  | 1                  | 7.05E-01 | 1                  | 7.05E-01 | 1                  | 5.00E-01 | 1                  | 5.00E-01 | 1                  | 6.60E-01 | 1                  | 6.60E-01 |
| PIGV     | 1   | 2                  | 4.42E-01 | 2                  | 4.42E-01 | 1                  | 5.00E-01 | 1                  | 5.00E-01 | 1                  | 6.43E-01 | 1                  | 6.43E-01 |
| METTL13  | 1   | 2                  | 4.27E-01 | 2                  | 4.27E-01 | 1                  | 5.00E-01 | 1                  | 5.00E-01 | 1                  | 6.96E-01 | 1                  | 6.96E-01 |
| SOX1     | 13  | 1                  | 7.52E-01 | 1                  | 7.52E-01 | 1                  | 5.00E-01 | 1                  | 5.00E-01 |                    |          |                    |          |
| RUFY2    | 10  | 1                  | 6.70E-01 | 1                  | 6.70E-01 | 1                  | 5.00E-01 | 1                  | 5.00E-01 | 1                  | 6.50E-01 | 1                  | 6.50E-01 |
| HOGA1    | 10  | 1                  | 7.52E-01 | 1                  | 7.52E-01 | 1                  | 5.00E-01 | 1                  | 5.00E-01 |                    |          |                    |          |
| ARRB2    | 17  | 1                  | 7.52E-01 | 1                  | 7.52E-01 | 1                  | 5.00E-01 | 1                  | 5.00E-01 |                    |          |                    |          |
| RSPO1    | 1   | 1                  | 7.52E-01 | 1                  | 7.52E-01 | 1                  | 5.00E-01 | 1                  | 5.00E-01 |                    |          |                    |          |
| ERAP1    | 5   | 6                  | 2.67E-01 | 6                  | 2.67E-01 | 5                  | 5.00E-01 | 5                  | 5.00E-01 | 5                  | 7.63E-01 | 5                  | 7.63E-01 |
| MGAT4B   | 5   | 1                  | 7.55E-01 | 1                  | 7.55E-01 | 1                  | 5.00E-01 | 1                  | 5.00E-01 |                    |          |                    |          |
| GPR83    | 11  | 1                  | 7.55E-01 | 1                  | 7.55E-01 | 1                  | 5.00E-01 | 1                  | 5.00E-01 |                    |          |                    |          |
| PAQR9    | 3   | 1                  | 7.55E-01 | 1                  | 7.55E-01 | 1                  | 5.00E-01 | 1                  | 5.00E-01 |                    |          |                    |          |
| DNLZ     | 9   | 4                  | 2.01E-01 | 4                  | 2.01E-01 | 4                  | 1.00E+00 | 4                  | 1.00E+00 | 1                  | 5.00E-01 | 1                  | 5.00E-01 |
| MYT1L    | 2   | 1                  | 7.58E-01 | 1                  | 7.58E-01 | 1                  | 5.00E-01 | 1                  | 5.00E-01 |                    |          |                    |          |
| FOXC2    | 16  | 1                  | 7.30E-01 | 1                  | 7.30E-01 | 1                  | 5.00E-01 | 1                  | 5.00E-01 | 1                  | 6.35E-01 | 1                  | 6.35E-01 |
| MFSD14B  | 9   | 1                  | 7.58E-01 | 1                  | 7.58E-01 | 1                  | 5.00E-01 | 1                  | 5.00E-01 |                    |          |                    |          |
| DEFB1    | 8   | 1                  | 7.58E-01 | 1                  | 7.58E-01 | 1                  | 5.00E-01 | 1                  | 5.00E-01 |                    |          |                    |          |
| GLUD1    | 10  | 1                  | 7.58E-01 | 1                  | 7.58E-01 | 1                  | 5.00E-01 | 1                  | 5.00E-01 |                    |          |                    |          |
| NHEJ1    | 2   | 1                  | 7.58E-01 | 1                  | 7.58E-01 | 1                  | 5.00E-01 | 1                  | 5.00E-01 |                    |          |                    |          |
| WDTC1    | 1   | 1                  | 7.58E-01 | 1                  | 7.58E-01 | 1                  | 5.00E-01 | 1                  | 5.00E-01 |                    |          |                    |          |
| INSIG1   | 7   | 1                  | 7.47E-01 | 1                  | 7.47E-01 | 1                  | 5.00E-01 | 1                  | 5.00E-01 |                    |          |                    |          |
| ZNF701   | 19  | 1                  | 7.47E-01 | 1                  | 7.47E-01 | 1                  | 5.00E-01 | 1                  | 5.00E-01 |                    |          |                    |          |
| GALR3    | 22  | 1                  | 7.47E-01 | 1                  | 7.47E-01 | 1                  | 5.00E-01 | 1                  | 5.00E-01 |                    |          |                    |          |
| SREK1IP1 | 5   | 1                  | 7.47E-01 | 1                  | 7.47E-01 | 1                  | 5.00E-01 | 1                  | 5.00E-01 |                    |          |                    |          |
| ATRAID   | 2   | 1                  | 7.47E-01 | 1                  | 7.47E-01 | 1                  | 5.00E-01 | 1                  | 5.00E-01 |                    |          |                    |          |
| NPW      | 16  | 1                  | 7.47E-01 | 1                  | 7.47E-01 | 1                  | 5.00E-01 | 1                  | 5.00E-01 |                    |          |                    |          |
| RNF145   | 5   | 1                  | 7.47E-01 | 1                  | 7.47E-01 | 1                  | 5.00E-01 | 1                  | 5.00E-01 |                    |          |                    |          |
| AS3MT    | 10  | 2                  | 2.67E-01 | 2                  | 2.67E-01 | 2                  | 5.00E-01 | 2                  | 5.00E-01 |                    |          |                    |          |
| CDH11    | 16  | 3                  | 3.33E-01 | 4                  | 3.34E-01 | 3                  | 6.40E-01 | 4                  | 6.40E-01 |                    |          | 1                  | 5.01E-01 |
| NSMCE4A  | 10  | 1                  | 7.49E-01 | 1                  | 7.49E-01 | 1                  | 5.01E-01 | 1                  | 5.01E-01 |                    |          |                    |          |
| GK2      | 4   | 2                  | 2.63E-01 | 2                  | 2.63E-01 | 1                  | 5.01E-01 | 1                  | 5.01E-01 | 2                  | 6.47E-01 | 2                  | 6.47E-01 |
| DMC1     | 22  | 1                  | 7.49E-01 | 1                  | 7.49E-01 | 1                  | 5.01E-01 | 1                  | 5.01E-01 |                    |          |                    |          |
| SV2C     | 5   | 2                  | 3.57E-01 | 2                  | 3.57E-01 | 1                  | 5.01E-01 | 1                  | 5.01E-01 | 1                  | 6.44E-01 | 1                  | 6.44E-01 |
| CLEC4D   | 12  | 1                  | 7.54E-01 | 1                  | 7.54E-01 | 1                  | 5.01E-01 | 1                  | 5.01E-01 |                    |          |                    |          |
| IDH2     | 15  | 1                  | 7.54E-01 | 1                  | 7.54E-01 | 1                  | 5.01E-01 | 1                  | 5.01E-01 |                    |          |                    |          |
| MTRF1    | 13  | 2                  | 3.79E-01 | 2                  | 3.79E-01 | 1                  | 5.01E-01 | 1                  | 5.01E-01 | 1                  | 5.82E-01 | 1                  | 5.82E-01 |

| SetID    | Chr | ADEH- vs NA        |          |                    |          | ADEH+ vs ADEH-     |          |                    |          | ADEH+ vs NA        |          |                    |          |
|----------|-----|--------------------|----------|--------------------|----------|--------------------|----------|--------------------|----------|--------------------|----------|--------------------|----------|
|          |     | rarenovel          |          | all                |          | rarenovel          |          | all                |          | rarenovel          |          | all                |          |
|          |     | N variants in test | p-value  | N variants in test | p-value  | N variants in test | p-value  | N variants in test | p-value  | N variants in test | p-value  | N variants in test | p-value  |
| EMILIN2  | 18  | 1                  | 7.54E-01 | 1                  | 7.54E-01 | 1                  | 5.01E-01 | 1                  | 5.01E-01 |                    |          |                    |          |
| WDR54    | 2   | 1                  | 7.54E-01 | 1                  | 7.54E-01 | 1                  | 5.01E-01 | 1                  | 5.01E-01 |                    |          |                    |          |
| MAPK8IP1 | 11  | 1                  | 7.54E-01 | 1                  | 7.54E-01 | 1                  | 5.01E-01 | 1                  | 5.01E-01 |                    |          |                    |          |
| ATP1A3   | 19  | 1                  | 7.54E-01 | 1                  | 7.54E-01 | 1                  | 5.01E-01 | 1                  | 5.01E-01 |                    |          |                    |          |
| SMARCD3  | 7   | 1                  | 7.54E-01 | 1                  | 7.54E-01 | 1                  | 5.01E-01 | 1                  | 5.01E-01 |                    |          |                    |          |
| DENND6A  | 3   | 3                  | 5.90E-01 | 3                  | 5.90E-01 | 3                  | 5.01E-01 | 3                  | 5.01E-01 | 1                  | 6.45E-01 | 1                  | 6.45E-01 |
| HAAO     | 2   | 1                  | 7.48E-01 | 1                  | 7.48E-01 | 1                  | 5.01E-01 | 1                  | 5.01E-01 |                    |          |                    |          |
| NGLY1    | 3   | 1                  | 7.48E-01 | 1                  | 7.48E-01 | 1                  | 5.01E-01 | 1                  | 5.01E-01 |                    |          |                    |          |
| CYB561   | 17  | 1                  | 7.48E-01 | 1                  | 7.48E-01 | 1                  | 5.01E-01 | 1                  | 5.01E-01 |                    |          |                    |          |
| FASLG    | 1   | 1                  | 7.48E-01 | 1                  | 7.48E-01 | 1                  | 5.01E-01 | 1                  | 5.01E-01 |                    |          |                    |          |
| SLC35D1  | 1   | 1                  | 7.48E-01 | 1                  | 7.48E-01 | 1                  | 5.01E-01 | 1                  | 5.01E-01 |                    |          |                    |          |
| EPB41L2  | 6   | 3                  | 7.10E-01 | 3                  | 7.10E-01 | 3                  | 5.01E-01 | 3                  | 5.01E-01 | 1                  | 6.55E-01 | 1                  | 6.55E-01 |
| MBOAT4   | 8   | 1                  | 7.44E-01 | 1                  | 7.44E-01 | 1                  | 5.01E-01 | 1                  | 5.01E-01 |                    |          |                    |          |
| C16orf58 | 16  | 1                  | 7.44E-01 | 1                  | 7.44E-01 | 1                  | 5.01E-01 | 1                  | 5.01E-01 |                    |          |                    |          |
| MVK      | 12  | 1                  | 7.44E-01 | 1                  | 7.44E-01 | 1                  | 5.01E-01 | 1                  | 5.01E-01 |                    |          |                    |          |
| ZNF512B  | 20  | 2                  | 4.62E-01 | 2                  | 4.62E-01 | 1                  | 5.01E-01 | 1                  | 5.01E-01 | 1                  | 6.30E-01 | 1                  | 6.30E-01 |
| CLEC12A  | 12  | 1                  | 7.44E-01 | 1                  | 7.44E-01 | 1                  | 5.01E-01 | 1                  | 5.01E-01 |                    |          |                    |          |
| TATDN2   | 3   | 2                  | 4.81E-01 | 2                  | 4.81E-01 | 1                  | 5.01E-01 | 1                  | 5.01E-01 | 1                  | 6.69E-01 | 1                  | 6.69E-01 |
| CLEC14A  | 14  | 2                  | 4.85E-01 | 2                  | 4.85E-01 | 1                  | 5.01E-01 | 1                  | 5.01E-01 | 1                  | 6.05E-01 | 1                  | 6.05E-01 |
| BEND3    | 6   | 1                  | 7.44E-01 | 1                  | 7.44E-01 | 1                  | 5.01E-01 | 1                  | 5.01E-01 |                    |          |                    |          |
| CACNG8   | 19  | 1                  | 7.44E-01 | 1                  | 7.44E-01 | 1                  | 5.01E-01 | 1                  | 5.01E-01 |                    |          |                    |          |
| CNNM4    | 2   | 1                  | 7.44E-01 | 1                  | 7.44E-01 | 1                  | 5.01E-01 | 1                  | 5.01E-01 |                    |          |                    |          |
| OSBPL1A  | 18  | 4                  | 3.18E-01 | 4                  | 3.18E-01 | 2                  | 1.00E+00 | 2                  | 1.00E+00 | 3                  | 5.01E-01 | 3                  | 5.01E-01 |
| ULK3     | 15  | 2                  | 1.95E-01 | 2                  | 1.95E-01 | 2                  | 5.01E-01 | 2                  | 5.01E-01 |                    |          |                    |          |
| HNRNPU   | 1   | 2                  | 3.91E-01 | 2                  | 3.91E-01 | 1                  | 5.01E-01 | 1                  | 5.01E-01 | 1                  | 6.34E-01 | 1                  | 6.34E-01 |
| OR10K1   | 1   | 2                  | 4.38E-01 | 2                  | 4.38E-01 | 1                  | 5.01E-01 | 1                  | 5.01E-01 | 1                  | 6.23E-01 | 1                  | 6.23E-01 |
| TBX15    | 1   | 2                  | 3.71E-01 | 3                  | 3.59E-01 | 1                  | 5.01E-01 | 2                  | 1.00E+00 | 1                  | 6.34E-01 | 2                  | 1.00E+00 |
| SCGB3A2  | 5   | 1                  | 7.51E-01 | 1                  | 7.51E-01 | 1                  | 5.01E-01 | 1                  | 5.01E-01 |                    |          |                    |          |
| ZNF517   | 8   | 1                  | 6.70E-01 | 1                  | 6.70E-01 | 1                  | 5.01E-01 | 1                  | 5.01E-01 | 1                  | 6.43E-01 | 1                  | 6.43E-01 |
| SLC35A3  | 1   | 2                  | 4.81E-01 | 2                  | 4.81E-01 | 1                  | 5.01E-01 | 1                  | 5.01E-01 | 1                  | 6.19E-01 | 1                  | 6.19E-01 |
| ADAM12   | 10  | 2                  | 4.18E-01 | 2                  | 4.18E-01 | 1                  | 5.01E-01 | 1                  | 5.01E-01 | 1                  | 6.06E-01 | 1                  | 6.06E-01 |
| GJB2     | 13  | 1                  | 6.80E-01 | 1                  | 6.80E-01 | 1                  | 5.01E-01 | 1                  | 5.01E-01 | 1                  | 6.25E-01 | 1                  | 6.25E-01 |
| ARHGEF5  | 7   | 1                  | 7.50E-01 | 1                  | 7.50E-01 | 1                  | 5.01E-01 | 1                  | 5.01E-01 |                    |          |                    |          |
| MATR3    | 5   | 1                  | 7.50E-01 | 1                  | 7.50E-01 | 1                  | 5.01E-01 | 1                  | 5.01E-01 |                    |          |                    |          |
| PMM1     | 22  | 2                  | 2.73E-01 | 2                  | 2.73E-01 | 1                  | 5.01E-01 | 1                  | 5.01E-01 | 2                  | 6.45E-01 | 2                  | 6.45E-01 |
| SERPINA4 | 14  | 2                  | 4.50E-01 | 2                  | 4.50E-01 | 1                  | 5.01E-01 | 1                  | 5.01E-01 | 1                  | 6.13E-01 | 1                  | 6.13E-01 |
| KCNK4    | 11  | 1                  | 7.55E-01 | 1                  | 7.55E-01 | 1                  | 5.01E-01 | 1                  | 5.01E-01 |                    |          |                    |          |
| ADPRM    | 17  | 1                  | 7.55E-01 | 1                  | 7.55E-01 | 1                  | 5.01E-01 | 1                  | 5.01E-01 |                    |          |                    |          |
| CTSW     | 11  | 1                  | 7.55E-01 | 1                  | 7.55E-01 | 1                  | 5.01E-01 | 1                  | 5.01E-01 |                    |          |                    |          |
| CDC23    | 5   | 2                  | 4.32E-01 | 2                  | 4.32E-01 | 1                  | 5.01E-01 | 1                  | 5.01E-01 | 1                  | 6.58E-01 | 1                  | 6.58E-01 |
| CEBPB    | 20  | 1                  | 7.55E-01 | 1                  | 7.55E-01 | 1                  | 5.01E-01 | 1                  | 5.01E-01 |                    |          |                    |          |
| SYDE1    | 19  | 3                  | 1.56E-01 | 3                  | 1.56E-01 | 1                  | 5.01E-01 | 1                  | 5.01E-01 | 2                  | 6.23E-01 | 2                  | 6.23E-01 |
| C12orf77 | 12  | 1                  | 7.52E-01 | 1                  | 7.52E-01 | 1                  | 5.01E-01 | 1                  | 5.01E-01 |                    |          |                    |          |
| TRAPPC3L | 6   | 1                  | 7.52E-01 | 1                  | 7.52E-01 | 1                  | 5.01E-01 | 1                  | 5.01E-01 |                    |          |                    |          |
| DUXA     | 19  | 1                  | 7.48E-01 | 1                  | 7.48E-01 | 1                  | 5.01E-01 | 1                  | 5.01E-01 |                    |          |                    |          |
| DHRS1    | 14  | 1                  | 7.48E-01 | 1                  | 7.48E-01 | 1                  | 5.01E-01 | 1                  | 5.01E-01 |                    |          |                    |          |
| PRIMA1   | 14  | 1                  | 7.48E-01 | 1                  | 7.48E-01 | 1                  | 5.01E-01 | 1                  | 5.01E-01 |                    |          |                    |          |
| ERCC1    | 19  | 1                  | 6.97E-01 | 1                  | 6.97E-01 | 1                  | 5.01E-01 | 1                  | 5.01E-01 | 1                  | 6.30E-01 | 1                  | 6.30E-01 |

| SetID     | Chr | ADEH- vs NA        |          |                    |          | ADEH+ vs ADEH-     |          |                    |          | ADEH+ vs NA        |          |                    |          |
|-----------|-----|--------------------|----------|--------------------|----------|--------------------|----------|--------------------|----------|--------------------|----------|--------------------|----------|
|           |     | rarenovel          |          | all                |          | rarenovel          |          | all                |          | rarenovel          |          | all                |          |
|           |     | N variants in test | p-value  | N variants in test | p-value  | N variants in test | p-value  | N variants in test | p-value  | N variants in test | p-value  | N variants in test | p-value  |
| LEAP2     | 5   | 1                  | 7.48E-01 | 1                  | 7.48E-01 | 1                  | 5.01E-01 | 1                  | 5.01E-01 |                    |          |                    |          |
| TGM6      | 20  | 3                  | 5.25E-01 | 3                  | 5.25E-01 | 2                  | 5.01E-01 | 2                  | 5.01E-01 | 3                  | 1.00E+00 | 3                  | 1.00E+00 |
| POGK      | 1   | 1                  | 7.53E-01 | 1                  | 7.53E-01 | 1                  | 5.01E-01 | 1                  | 5.01E-01 |                    |          |                    |          |
| C7orf61   | 7   | 1                  | 7.53E-01 | 1                  | 7.53E-01 | 1                  | 5.01E-01 | 1                  | 5.01E-01 |                    |          |                    |          |
| HSF2BP    | 21  | 1                  | 7.09E-01 | 1                  | 7.09E-01 | 1                  | 5.01E-01 | 1                  | 5.01E-01 | 1                  | 6.59E-01 | 1                  | 6.59E-01 |
| RUNX1     | 21  | 1                  | 7.29E-01 | 1                  | 7.29E-01 | 1                  | 5.02E-01 | 1                  | 5.02E-01 | 1                  | 6.31E-01 | 1                  | 6.31E-01 |
| ACTR8     | 3   | 1                  | 7.59E-01 | 1                  | 7.59E-01 | 1                  | 5.02E-01 | 1                  | 5.02E-01 |                    |          |                    |          |
| LHX4      | 1   | 1                  | 7.59E-01 | 1                  | 7.59E-01 | 1                  | 5.02E-01 | 1                  | 5.02E-01 |                    |          |                    |          |
| PLCL2     | 3   | 1                  | 7.59E-01 | 1                  | 7.59E-01 | 1                  | 5.02E-01 | 1                  | 5.02E-01 |                    |          |                    |          |
| VPS33A    | 12  | 1                  | 7.61E-01 | 1                  | 7.61E-01 | 1                  | 5.02E-01 | 1                  | 5.02E-01 |                    |          |                    |          |
| CDHR1     | 10  | 2                  | 2.89E-01 | 2                  | 2.89E-01 | 1                  | 5.02E-01 | 1                  | 5.02E-01 | 2                  | 6.41E-01 | 2                  | 6.41E-01 |
| DPP8      | 15  | 1                  | 7.61E-01 | 1                  | 7.61E-01 | 1                  | 5.02E-01 | 1                  | 5.02E-01 |                    |          |                    |          |
| MMP13     | 11  | 2                  | 3.53E-01 | 2                  | 3.53E-01 | 1                  | 5.02E-01 | 1                  | 5.02E-01 | 1                  | 6.50E-01 | 1                  | 6.50E-01 |
| EVX1      | 7   | 2                  | 4.07E-01 | 2                  | 4.07E-01 | 1                  | 5.02E-01 | 1                  | 5.02E-01 | 1                  | 5.17E-01 | 1                  | 5.17E-01 |
| C2orf42   | 2   | 1                  | 7.61E-01 | 1                  | 7.61E-01 | 1                  | 5.02E-01 | 1                  | 5.02E-01 |                    |          |                    |          |
| TBK1      | 12  | 1                  | 7.61E-01 | 1                  | 7.61E-01 | 1                  | 5.02E-01 | 1                  | 5.02E-01 |                    |          |                    |          |
| TMEM179B  | 11  | 1                  | 7.61E-01 | 1                  | 7.61E-01 | 1                  | 5.02E-01 | 1                  | 5.02E-01 |                    |          |                    |          |
| SECISBP2L | 15  | 5                  | 1.68E-01 | 5                  | 1.68E-01 | 2                  | 5.86E-01 | 2                  | 5.86E-01 | 3                  | 5.02E-01 | 3                  | 5.02E-01 |
| WDR12     | 2   | 1                  | 7.50E-01 | 1                  | 7.50E-01 | 1                  | 5.02E-01 | 1                  | 5.02E-01 |                    |          |                    |          |
| C11orf24  | 11  | 1                  | 7.50E-01 | 2                  | 7.51E-01 | 1                  | 5.02E-01 | 2                  | 5.02E-01 |                    |          | 1                  | 7.88E-01 |
| TMEM145   | 19  | 1                  | 7.50E-01 | 1                  | 7.50E-01 | 1                  | 5.02E-01 | 1                  | 5.02E-01 |                    |          |                    |          |
| U2SURP    | 3   | 1                  | 7.50E-01 | 1                  | 7.50E-01 | 1                  | 5.02E-01 | 1                  | 5.02E-01 |                    |          |                    |          |
| PFDN5     | 12  | 1                  | 7.50E-01 | 1                  | 7.50E-01 | 1                  | 5.02E-01 | 1                  | 5.02E-01 |                    |          |                    |          |
| CCND3     | 6   | 1                  | 7.50E-01 | 1                  | 7.50E-01 | 1                  | 5.02E-01 | 1                  | 5.02E-01 |                    |          |                    |          |
| FBXO3     | 11  | 1                  | 7.50E-01 | 1                  | 7.50E-01 | 1                  | 5.02E-01 | 1                  | 5.02E-01 |                    |          |                    |          |
| TERF1     | 8   | 1                  | 7.50E-01 | 1                  | 7.50E-01 | 1                  | 5.02E-01 | 1                  | 5.02E-01 |                    |          |                    |          |
| KIAA0196  | 8   | 5                  | 5.99E-01 | 5                  | 5.99E-01 | 4                  | 5.02E-01 | 4                  | 5.02E-01 | 1                  | 6.03E-01 | 1                  | 6.03E-01 |
| ALDH8A1   | 6   | 2                  | 3.82E-01 | 2                  | 3.82E-01 | 1                  | 5.02E-01 | 1                  | 5.02E-01 | 1                  | 6.45E-01 | 1                  | 6.45E-01 |
| HSP90AA1  | 14  | 1                  | 7.54E-01 | 1                  | 7.54E-01 | 1                  | 5.02E-01 | 1                  | 5.02E-01 |                    |          |                    |          |
| SRSF1     | 17  | 1                  | 7.54E-01 | 1                  | 7.54E-01 | 1                  | 5.02E-01 | 1                  | 5.02E-01 |                    |          |                    |          |
| SPON2     | 4   | 2                  | 4.22E-01 | 2                  | 4.22E-01 | 1                  | 5.02E-01 | 1                  | 5.02E-01 | 1                  | 6.09E-01 | 1                  | 6.09E-01 |
| CCDC137   | 17  | 1                  | 7.55E-01 | 3                  | 1.50E-01 | 1                  | 5.02E-01 | 3                  | 5.56E-01 |                    |          | 2                  | 6.98E-01 |
| PDXP      | 22  | 2                  | 4.09E-01 | 2                  | 4.09E-01 | 1                  | 5.02E-01 | 1                  | 5.02E-01 | 1                  | 6.52E-01 | 1                  | 6.52E-01 |
| PGR       | 11  | 1                  | 7.55E-01 | 1                  | 7.55E-01 | 1                  | 5.02E-01 | 1                  | 5.02E-01 |                    |          |                    |          |
| GFRA1     | 10  | 1                  | 7.55E-01 | 1                  | 7.55E-01 | 1                  | 5.02E-01 | 1                  | 5.02E-01 |                    |          |                    |          |
| MB        | 22  | 1                  | 7.55E-01 | 1                  | 7.55E-01 | 1                  | 5.02E-01 | 1                  | 5.02E-01 |                    |          |                    |          |
| CLDN1     | 3   | 1                  | 7.55E-01 | 1                  | 7.55E-01 | 1                  | 5.02E-01 | 1                  | 5.02E-01 |                    |          |                    |          |
| NMS       | 2   | 1                  | 7.55E-01 | 1                  | 7.55E-01 | 1                  | 5.02E-01 | 1                  | 5.02E-01 |                    |          |                    |          |
| TNFAIP8L2 | 1   | 1                  | 7.16E-01 | 1                  | 7.16E-01 | 1                  | 5.02E-01 | 1                  | 5.02E-01 | 1                  | 6.18E-01 | 1                  | 6.18E-01 |
| CTSH      | 15  | 1                  | 6.95E-01 | 2                  | 8.64E-01 | 1                  | 5.02E-01 | 2                  | 6.69E-01 | 1                  | 6.17E-01 | 2                  | 8.05E-01 |
| FGF23     | 12  | 1                  | 7.53E-01 | 1                  | 7.53E-01 | 1                  | 5.02E-01 | 1                  | 5.02E-01 |                    |          |                    |          |
| ALAS1     | 3   | 2                  | 4.34E-01 | 2                  | 4.34E-01 | 1                  | 5.02E-01 | 1                  | 5.02E-01 | 1                  | 6.50E-01 | 1                  | 6.50E-01 |
| ACSM6     | 10  | 1                  | 7.53E-01 | 1                  | 7.53E-01 | 1                  | 5.02E-01 | 1                  | 5.02E-01 |                    |          |                    |          |
| KRTCAP3   | 2   | 1                  | 7.53E-01 | 1                  | 7.53E-01 | 1                  | 5.02E-01 | 1                  | 5.02E-01 |                    |          |                    |          |
| PRELID1   | 5   | 1                  | 7.53E-01 | 1                  | 7.53E-01 | 1                  | 5.02E-01 | 1                  | 5.02E-01 |                    |          |                    |          |
| METAP2    | 12  | 1                  | 7.61E-01 | 1                  | 7.61E-01 | 1                  | 5.02E-01 | 1                  | 5.02E-01 |                    |          |                    |          |
| GDF3      | 12  | 1                  | 7.61E-01 | 1                  | 7.61E-01 | 1                  | 5.02E-01 | 1                  | 5.02E-01 |                    |          |                    |          |
| TMEM170A  | 16  | 2                  | 4.07E-01 | 2                  | 4.07E-01 | 1                  | 5.02E-01 | 1                  | 5.02E-01 | 1                  | 6.23E-01 | 1                  | 6.23E-01 |

| SetID      | Chr | ADEH- vs NA        |          |                    |          | ADEH+ vs ADEH-     |          |                    |          | ADEH+ vs NA        |          |                    |          |
|------------|-----|--------------------|----------|--------------------|----------|--------------------|----------|--------------------|----------|--------------------|----------|--------------------|----------|
|            |     | rare novel         |          | all                |          | rare novel         |          | all                |          | rare novel         |          | all                |          |
|            |     | N variants in test | p-value  | N variants in test | p-value  | N variants in test | p-value  | N variants in test | p-value  | N variants in test | p-value  | N variants in test | p-value  |
| MOG        | 6   | 1                  | 7.61E-01 | 1                  | 7.61E-01 | 1                  | 5.02E-01 | 1                  | 5.02E-01 |                    |          |                    |          |
| ZNRD1      | 6   | 1                  | 7.61E-01 | 1                  | 7.61E-01 | 1                  | 5.02E-01 | 1                  | 5.02E-01 |                    |          |                    |          |
| FAM129A    | 1   | 1                  | 7.61E-01 | 1                  | 7.61E-01 | 1                  | 5.02E-01 | 1                  | 5.02E-01 |                    |          |                    |          |
| RASL12     | 15  | 1                  | 7.61E-01 | 1                  | 7.61E-01 | 1                  | 5.02E-01 | 1                  | 5.02E-01 |                    |          |                    |          |
| CD82       | 11  | 1                  | 7.31E-01 | 1                  | 7.31E-01 | 1                  | 5.02E-01 | 1                  | 5.02E-01 | 1                  | 5.98E-01 | 1                  | 5.98E-01 |
| TST        | 22  | 1                  | 7.61E-01 | 1                  | 7.61E-01 | 1                  | 5.02E-01 | 1                  | 5.02E-01 |                    |          |                    |          |
| ZNF180     | 19  | 1                  | 7.44E-01 | 1                  | 7.44E-01 | 1                  | 5.02E-01 | 1                  | 5.02E-01 |                    |          |                    |          |
| C7orf33    | 7   | 1                  | 7.44E-01 | 1                  | 7.44E-01 | 1                  | 5.02E-01 | 1                  | 5.02E-01 |                    |          |                    |          |
| PPP1R13B   | 14  | 2                  | 3.76E-01 | 2                  | 3.76E-01 | 1                  | 5.02E-01 | 1                  | 5.02E-01 | 1                  | 6.06E-01 | 1                  | 6.06E-01 |
| OR5K3      | 3   | 4                  | 1.45E-01 | 5                  | 1.56E-01 | 1                  | 5.02E-01 | 2                  | 5.96E-01 | 3                  | 6.30E-01 | 4                  | 6.74E-01 |
| PGLYRP2    | 19  | 1                  | 7.44E-01 | 1                  | 7.44E-01 | 1                  | 5.02E-01 | 1                  | 5.02E-01 |                    |          |                    |          |
| THUMPD1    | 16  | 1                  | 7.44E-01 | 1                  | 7.44E-01 | 1                  | 5.02E-01 | 1                  | 5.02E-01 |                    |          |                    |          |
| ALX3       | 1   | 1                  | 7.44E-01 | 1                  | 7.44E-01 | 1                  | 5.02E-01 | 1                  | 5.02E-01 |                    |          |                    |          |
| ZWILCH     | 15  | 1                  | 7.44E-01 | 1                  | 7.44E-01 | 1                  | 5.02E-01 | 1                  | 5.02E-01 |                    |          |                    |          |
| LZTS2      | 10  | 1                  | 7.49E-01 | 1                  | 7.49E-01 | 1                  | 5.03E-01 | 1                  | 5.03E-01 |                    |          |                    |          |
| HIST3H2A   | 1   | 1                  | 7.49E-01 | 1                  | 7.49E-01 | 1                  | 5.03E-01 | 1                  | 5.03E-01 |                    |          |                    |          |
| GNB5       | 15  | 2                  | 4.40E-01 | 2                  | 4.40E-01 | 1                  | 5.03E-01 | 1                  | 5.03E-01 | 1                  | 6.42E-01 | 1                  | 6.42E-01 |
| C16orf52   | 16  | 1                  | 7.56E-01 | 1                  | 7.56E-01 | 1                  | 5.03E-01 | 1                  | 5.03E-01 |                    |          |                    |          |
| CCR9       | 3   | 1                  | 7.37E-01 | 1                  | 7.37E-01 | 1                  | 5.03E-01 | 1                  | 5.03E-01 | 1                  | 6.30E-01 | 1                  | 6.30E-01 |
| PEX3       | 6   | 1                  | 7.61E-01 | 1                  | 7.61E-01 | 1                  | 5.03E-01 | 1                  | 5.03E-01 |                    |          |                    |          |
| DACT3      | 19  | 1                  | 7.61E-01 | 1                  | 7.61E-01 | 1                  | 5.03E-01 | 1                  | 5.03E-01 |                    |          |                    |          |
| ORC3       | 6   | 2                  | 3.47E-01 | 2                  | 3.47E-01 | 1                  | 5.03E-01 | 1                  | 5.03E-01 | 1                  | 6.19E-01 | 1                  | 6.19E-01 |
| WBSCR27    | 7   | 2                  | 6.13E-01 | 2                  | 6.13E-01 | 2                  | 5.03E-01 | 2                  | 5.03E-01 | 1                  | 5.28E-01 | 1                  | 5.28E-01 |
| TAP2       | 6   | 1                  | 6.92E-01 | 2                  | 6.97E-01 | 1                  | 5.03E-01 | 2                  | 5.04E-01 | 1                  | 6.37E-01 | 2                  | 6.42E-01 |
| C6orf25    | 6   | 1                  | 7.52E-01 | 1                  | 7.52E-01 | 1                  | 5.03E-01 | 1                  | 5.03E-01 |                    |          |                    |          |
| OR3A2      | 17  | 1                  | 6.69E-01 | 1                  | 6.69E-01 | 1                  | 5.03E-01 | 1                  | 5.03E-01 | 1                  | 6.68E-01 | 1                  | 6.68E-01 |
| DSN1       | 20  | 1                  | 7.52E-01 | 1                  | 7.52E-01 | 1                  | 5.03E-01 | 1                  | 5.03E-01 |                    |          |                    |          |
| C11orf52   | 11  | 2                  | 4.89E-01 | 2                  | 4.89E-01 | 1                  | 5.03E-01 | 1                  | 5.03E-01 | 1                  | 6.32E-01 | 1                  | 6.32E-01 |
| EIF3L      | 22  | 1                  | 7.52E-01 | 1                  | 7.52E-01 | 1                  | 5.03E-01 | 1                  | 5.03E-01 |                    |          |                    |          |
| MAP3K7     | 6   | 1                  | 7.52E-01 | 1                  | 7.52E-01 | 1                  | 5.03E-01 | 1                  | 5.03E-01 |                    |          |                    |          |
| CSGALNACT2 | 10  | 1                  | 7.49E-01 | 1                  | 7.49E-01 | 1                  | 5.03E-01 | 1                  | 5.03E-01 |                    |          |                    |          |
| LPCAT1     | 5   | 1                  | 7.49E-01 | 1                  | 7.49E-01 | 1                  | 5.03E-01 | 1                  | 5.03E-01 |                    |          |                    |          |
| PNPLA8     | 7   | 1                  | 7.49E-01 | 1                  | 7.49E-01 | 1                  | 5.03E-01 | 1                  | 5.03E-01 |                    |          |                    |          |
| CDCA2      | 8   | 4                  | 4.75E-01 | 4                  | 4.75E-01 | 2                  | 6.83E-01 | 2                  | 6.83E-01 | 3                  | 5.03E-01 | 3                  | 5.03E-01 |
| ATP1A1     | 1   | 1                  | 7.45E-01 | 1                  | 7.45E-01 | 1                  | 5.03E-01 | 1                  | 5.03E-01 |                    |          |                    |          |
| COX20      | 1   | 1                  | 7.45E-01 | 1                  | 7.45E-01 | 1                  | 5.03E-01 | 1                  | 5.03E-01 |                    |          |                    |          |
| APOL5      | 22  | 2                  | 3.83E-01 | 4                  | 3.83E-01 | 1                  | 5.03E-01 | 3                  | 5.07E-01 | 1                  | 6.50E-01 | 3                  | 6.57E-01 |
| TTC8       | 14  | 1                  | 7.45E-01 | 1                  | 7.45E-01 | 1                  | 5.03E-01 | 1                  | 5.03E-01 |                    |          |                    |          |
| HELZ       | 17  | 2                  | 4.33E-01 | 3                  | 4.51E-01 | 1                  | 5.03E-01 | 2                  | 5.64E-01 | 1                  | 6.23E-01 | 2                  | 6.64E-01 |
| CAPZA2     | 7   | 1                  | 7.45E-01 | 1                  | 7.45E-01 | 1                  | 5.03E-01 | 1                  | 5.03E-01 |                    |          |                    |          |
| ZNF660     | 3   | 1                  | 6.90E-01 | 1                  | 6.90E-01 | 1                  | 5.03E-01 | 1                  | 5.03E-01 | 1                  | 6.42E-01 | 1                  | 6.42E-01 |
| TBX4       | 17  | 1                  | 6.96E-01 | 1                  | 6.96E-01 | 1                  | 5.03E-01 | 1                  | 5.03E-01 | 1                  | 6.31E-01 | 1                  | 6.31E-01 |
| OR8J3      | 11  | 1                  | 7.42E-01 | 2                  | 1.00E+00 | 1                  | 5.44E-01 | 2                  | 6.86E-01 |                    |          | 1                  | 5.03E-01 |
| USP13      | 3   | 4                  | 2.17E-01 | 4                  | 2.17E-01 | 3                  | 5.58E-01 | 3                  | 5.58E-01 | 2                  | 5.03E-01 | 2                  | 5.03E-01 |
| AKAP8L     | 19  | 3                  | 7.31E-03 | 3                  | 7.31E-03 |                    |          |                    |          | 3                  | 5.03E-01 | 3                  | 5.03E-01 |
| ADCY10     | 1   | 5                  | 4.10E-01 | 5                  | 4.10E-01 | 5                  | 5.03E-01 | 5                  | 5.03E-01 | 1                  | 6.71E-01 | 1                  | 6.71E-01 |
| SPR        | 2   | 1                  | 7.61E-01 | 1                  | 7.61E-01 | 1                  | 5.03E-01 | 1                  | 5.03E-01 |                    |          |                    |          |
| PRLHR      | 10  | 1                  | 7.61E-01 | 1                  | 7.61E-01 | 1                  | 5.03E-01 | 1                  | 5.03E-01 |                    |          |                    |          |

| SetID     | Chr | ADEH- vs NA        |          |                    |          | ADEH+ vs ADEH-     |          |                    |          | ADEH+ vs NA        |          |                    |          |
|-----------|-----|--------------------|----------|--------------------|----------|--------------------|----------|--------------------|----------|--------------------|----------|--------------------|----------|
|           |     | rarenovel          |          | all                |          | rarenovel          |          | all                |          | rarenovel          |          | all                |          |
|           |     | N variants in test | p-value  | N variants in test | p-value  | N variants in test | p-value  | N variants in test | p-value  | N variants in test | p-value  | N variants in test | p-value  |
| ERBB3     | 12  | 2                  | 2.93E-01 | 3                  | 3.43E-01 | 1                  | 5.03E-01 | 2                  | 6.43E-01 | 1                  | 6.32E-01 | 2                  | 7.87E-01 |
| PMAIP1    | 18  | 1                  | 7.61E-01 | 1                  | 7.61E-01 | 1                  | 5.03E-01 | 1                  | 5.03E-01 |                    |          |                    |          |
| SLC16A6   | 17  | 1                  | 7.51E-01 | 1                  | 7.51E-01 | 1                  | 5.04E-01 | 1                  | 5.04E-01 |                    |          |                    |          |
| TMEM5     | 12  | 2                  | 4.40E-01 | 2                  | 4.40E-01 | 1                  | 5.04E-01 | 1                  | 5.04E-01 | 1                  | 6.12E-01 | 1                  | 6.12E-01 |
| VAPA      | 18  | 1                  | 7.50E-01 | 1                  | 7.50E-01 | 1                  | 5.04E-01 | 1                  | 5.04E-01 |                    |          |                    |          |
| APAF1     | 12  | 2                  | 5.10E-01 | 2                  | 5.10E-01 | 1                  | 5.04E-01 | 1                  | 5.04E-01 | 1                  | 5.77E-01 | 1                  | 5.77E-01 |
| PPP1R3C   | 10  | 1                  | 7.47E-01 | 1                  | 7.47E-01 | 1                  | 5.04E-01 | 1                  | 5.04E-01 |                    |          |                    |          |
| KBTBD4    | 11  | 1                  | 7.47E-01 | 1                  | 7.47E-01 | 1                  | 5.04E-01 | 1                  | 5.04E-01 |                    |          |                    |          |
| FAM195B   | 17  | 1                  | 7.47E-01 | 1                  | 7.47E-01 | 1                  | 5.04E-01 | 1                  | 5.04E-01 |                    |          |                    |          |
| USP49     | 6   | 1                  | 7.47E-01 | 1                  | 7.47E-01 | 1                  | 5.04E-01 | 1                  | 5.04E-01 |                    |          |                    |          |
| IL21R     | 16  | 2                  | 4.01E-01 | 2                  | 4.01E-01 | 1                  | 5.04E-01 | 1                  | 5.04E-01 | 1                  | 6.26E-01 | 1                  | 6.26E-01 |
| TLX1      | 10  | 2                  | 4.26E-01 | 2                  | 4.26E-01 | 1                  | 5.04E-01 | 1                  | 5.04E-01 | 1                  | 6.45E-01 | 1                  | 6.45E-01 |
| TMEM141   | 9   | 1                  | 7.51E-01 | 1                  | 7.51E-01 | 1                  | 5.04E-01 | 1                  | 5.04E-01 |                    |          |                    |          |
| IER5L     | 9   | 1                  | 7.51E-01 | 1                  | 7.51E-01 | 1                  | 5.04E-01 | 1                  | 5.04E-01 |                    |          |                    |          |
| EPAS1     | 2   | 2                  | 2.30E-01 | 2                  | 2.30E-01 | 1                  | 5.04E-01 | 1                  | 5.04E-01 | 2                  | 6.46E-01 | 2                  | 6.46E-01 |
| C11orf63  | 11  | 2                  | 6.30E-01 | 2                  | 6.30E-01 | 1                  | 5.04E-01 | 1                  | 5.04E-01 |                    |          |                    |          |
| LDLRAD3   | 11  | 3                  | 1.37E-01 | 3                  | 1.37E-01 | 1                  | 5.04E-01 | 1                  | 5.04E-01 | 2                  | 6.36E-01 | 2                  | 6.36E-01 |
| C10orf113 | 10  | 1                  | 7.51E-01 | 1                  | 7.51E-01 | 1                  | 5.04E-01 | 1                  | 5.04E-01 |                    |          |                    |          |
| TBCCD1    | 3   | 3                  | 1.05E-01 | 3                  | 1.05E-01 | 1                  | 5.04E-01 | 1                  | 5.04E-01 | 2                  | 6.11E-01 | 2                  | 6.11E-01 |
| REG3A     | 2   | 1                  | 7.51E-01 | 1                  | 7.51E-01 | 1                  | 5.04E-01 | 1                  | 5.04E-01 |                    |          |                    |          |
| MAP3K5    | 6   | 1                  | 7.51E-01 | 1                  | 7.51E-01 | 1                  | 5.04E-01 | 1                  | 5.04E-01 |                    |          |                    |          |
| DCAF13    | 8   | 4                  | 4.64E-02 | 4                  | 4.64E-02 | 1                  | 5.43E-01 | 1                  | 5.43E-01 | 3                  | 5.04E-01 | 3                  | 5.04E-01 |
| ZNF536    | 19  | 5                  | 2.03E-01 | 5                  | 2.03E-01 | 2                  | 1.00E+00 | 2                  | 1.00E+00 | 3                  | 5.04E-01 | 3                  | 5.04E-01 |
| TUBB1     | 20  | 8                  | 1.70E-01 | 8                  | 1.70E-01 | 6                  | 1.00E+00 | 6                  | 1.00E+00 | 7                  | 5.04E-01 | 7                  | 5.04E-01 |
| SUPT16H   | 14  | 1                  | 7.54E-01 | 1                  | 7.54E-01 | 1                  | 5.04E-01 | 1                  | 5.04E-01 |                    |          |                    |          |
| SLC7A6    | 16  | 2                  | 3.88E-01 | 2                  | 3.88E-01 | 1                  | 5.04E-01 | 1                  | 5.04E-01 | 1                  | 6.25E-01 | 1                  | 6.25E-01 |
| MYL6      | 12  | 1                  | 7.54E-01 | 1                  | 7.54E-01 | 1                  | 5.04E-01 | 1                  | 5.04E-01 |                    |          |                    |          |
| MED8      | 1   | 1                  | 7.54E-01 | 1                  | 7.54E-01 | 1                  | 5.04E-01 | 1                  | 5.04E-01 |                    |          |                    |          |
| GPANK1    | 6   | 2                  | 3.27E-01 | 2                  | 3.27E-01 | 1                  | 5.04E-01 | 1                  | 5.04E-01 | 1                  | 5.37E-01 | 1                  | 5.37E-01 |
| KRIT1     | 7   | 1                  | 7.57E-01 | 1                  | 7.57E-01 | 1                  | 5.04E-01 | 1                  | 5.04E-01 |                    |          |                    |          |
| PCDHB15   | 5   | 1                  | 7.57E-01 | 1                  | 7.57E-01 | 1                  | 5.04E-01 | 1                  | 5.04E-01 |                    |          |                    |          |
| MED31     | 17  | 1                  | 7.57E-01 | 1                  | 7.57E-01 | 1                  | 5.04E-01 | 1                  | 5.04E-01 |                    |          |                    |          |
| MSX1      | 4   | 1                  | 7.57E-01 | 1                  | 7.57E-01 | 1                  | 5.04E-01 | 1                  | 5.04E-01 |                    |          |                    |          |
| PTCD2     | 5   | 1                  | 7.57E-01 | 1                  | 7.57E-01 | 1                  | 5.04E-01 | 1                  | 5.04E-01 |                    |          |                    |          |
| GPRC5C    | 17  | 5                  | 5.37E-01 | 5                  | 5.37E-01 | 3                  | 7.51E-01 | 3                  | 7.51E-01 | 3                  | 5.04E-01 | 3                  | 5.04E-01 |
| GPD1      | 12  | 3                  | 1.57E-01 | 3                  | 1.57E-01 | 3                  | 5.04E-01 | 3                  | 5.04E-01 |                    |          |                    |          |
| COX6A1    | 12  | 1                  | 7.46E-01 | 1                  | 7.46E-01 | 1                  | 5.04E-01 | 1                  | 5.04E-01 |                    |          |                    |          |
| HBP1      | 7   | 1                  | 7.54E-01 | 1                  | 7.54E-01 | 1                  | 5.04E-01 | 1                  | 5.04E-01 |                    |          |                    |          |
| CLN6      | 15  | 1                  | 7.54E-01 | 1                  | 7.54E-01 | 1                  | 5.04E-01 | 1                  | 5.04E-01 |                    |          |                    |          |
| AAGAB     | 15  | 2                  | 2.87E-01 | 2                  | 2.87E-01 | 1                  | 5.04E-01 | 1                  | 5.04E-01 | 1                  | 6.16E-01 | 1                  | 6.16E-01 |
| BTN1A1    | 6   | 1                  | 7.54E-01 | 1                  | 7.54E-01 | 1                  | 5.04E-01 | 1                  | 5.04E-01 |                    |          |                    |          |
| C11orf94  | 11  | 1                  | 7.54E-01 | 1                  | 7.54E-01 | 1                  | 5.04E-01 | 1                  | 5.04E-01 |                    |          |                    |          |
| MYPN      | 10  | 8                  | 8.10E-01 | 9                  | 8.10E-01 | 6                  | 5.04E-01 | 7                  | 5.04E-01 | 2                  | 6.29E-01 | 3                  | 6.29E-01 |
| NEURL4    | 17  | 4                  | 3.71E-02 | 5                  | 3.61E-02 | 1                  | 5.27E-01 | 2                  | 5.52E-01 | 3                  | 5.04E-01 | 4                  | 5.05E-01 |
| MVD       | 16  | 1                  | 7.55E-01 | 1                  | 7.55E-01 | 1                  | 5.04E-01 | 1                  | 5.04E-01 |                    |          |                    |          |
| SPG21     | 15  | 1                  | 7.55E-01 | 1                  | 7.55E-01 | 1                  | 5.04E-01 | 1                  | 5.04E-01 |                    |          |                    |          |
| PDK2      | 17  | 1                  | 7.55E-01 | 1                  | 7.55E-01 | 1                  | 5.04E-01 | 1                  | 5.04E-01 |                    |          |                    |          |
| POMGNT2   | 3   | 2                  | 4.41E-01 | 2                  | 4.41E-01 | 1                  | 5.04E-01 | 1                  | 5.04E-01 | 1                  | 6.42E-01 | 1                  | 6.42E-01 |

| SetID    | Chr | ADEH- vs NA        |          |                    |          | ADEH+ vs ADEH-     |          |                    |          | ADEH+ vs NA        |          |                    |          |
|----------|-----|--------------------|----------|--------------------|----------|--------------------|----------|--------------------|----------|--------------------|----------|--------------------|----------|
|          |     | rarenovel          |          | all                |          | rarenovel          |          | all                |          | rarenovel          |          | all                |          |
|          |     | N variants in test | p-value  | N variants in test | p-value  | N variants in test | p-value  | N variants in test | p-value  | N variants in test | p-value  | N variants in test | p-value  |
|          |     |                    |          |                    |          |                    |          |                    |          |                    |          |                    |          |
| OTOR     | 20  | 1                  | 7.55E-01 | 2                  | 8.17E-01 | 1                  | 5.04E-01 | 2                  | 5.56E-01 |                    |          | 1                  | 6.22E-01 |
| SGCD     | 5   | 1                  | 7.55E-01 | 1                  | 7.55E-01 | 1                  | 5.04E-01 | 1                  | 5.04E-01 |                    |          |                    |          |
| ERLIN1   | 10  | 1                  | 7.55E-01 | 1                  | 7.55E-01 | 1                  | 5.04E-01 | 1                  | 5.04E-01 |                    |          |                    |          |
| C16orf13 | 16  | 4                  | 3.21E-01 | 4                  | 3.21E-01 | 3                  | 5.34E-01 | 3                  | 5.34E-01 | 2                  | 5.05E-01 | 2                  | 5.05E-01 |
| CAT      | 11  | 6                  | 7.95E-01 | 6                  | 7.95E-01 | 4                  | 6.20E-01 | 4                  | 6.20E-01 | 3                  | 5.05E-01 | 3                  | 5.05E-01 |
| CABLES2  | 20  | 1                  | 7.59E-01 | 1                  | 7.59E-01 | 1                  | 5.05E-01 | 1                  | 5.05E-01 |                    |          |                    |          |
| GARNL3   | 9   | 1                  | 7.59E-01 | 1                  | 7.59E-01 | 1                  | 5.05E-01 | 1                  | 5.05E-01 |                    |          |                    |          |
| ZFAND2A  | 7   | 1                  | 7.10E-01 | 1                  | 7.10E-01 | 1                  | 5.05E-01 | 1                  | 5.05E-01 | 1                  | 6.12E-01 | 1                  | 6.12E-01 |
| RSBN1L   | 7   | 1                  | 7.59E-01 | 1                  | 7.59E-01 | 1                  | 5.05E-01 | 1                  | 5.05E-01 |                    |          |                    |          |
| ACCSL    | 11  | 3                  | 1.00E-01 | 3                  | 1.00E-01 | 1                  | 5.05E-01 | 1                  | 5.05E-01 | 2                  | 6.50E-01 | 2                  | 6.50E-01 |
| FNBP1L   | 1   | 1                  | 7.59E-01 | 1                  | 7.59E-01 | 1                  | 5.05E-01 | 1                  | 5.05E-01 |                    |          |                    |          |
| RCAN3    | 1   | 1                  | 7.54E-01 | 1                  | 7.54E-01 | 1                  | 5.05E-01 | 1                  | 5.05E-01 |                    |          |                    |          |
| COX18    | 4   | 3                  | 7.25E-01 | 3                  | 7.25E-01 | 2                  | 5.05E-01 | 2                  | 5.05E-01 | 3                  | 5.10E-01 | 3                  | 5.10E-01 |
| FBN2     | 5   | 7                  | 8.36E-01 | 7                  | 8.36E-01 | 6                  | 5.05E-01 | 6                  | 5.05E-01 | 2                  | 6.39E-01 | 2                  | 6.39E-01 |
| OR12D2   | 6   | 2                  | 2.22E-01 | 3                  | 2.22E-01 | 2                  | 7.66E-01 | 3                  | 7.66E-01 |                    |          | 1                  | 5.05E-01 |
| SUCLG2   | 3   | 2                  | 4.05E-01 | 2                  | 4.05E-01 | 1                  | 5.05E-01 | 1                  | 5.05E-01 | 1                  | 7.02E-01 | 1                  | 7.02E-01 |
| BCS1L    | 2   | 1                  | 7.22E-01 | 1                  | 7.22E-01 | 1                  | 5.05E-01 | 1                  | 5.05E-01 | 1                  | 6.51E-01 | 1                  | 6.51E-01 |
| SULT2A1  | 19  | 1                  | 7.60E-01 | 1                  | 7.60E-01 | 1                  | 5.05E-01 | 1                  | 5.05E-01 |                    |          |                    |          |
| TMEM247  | 2   | 3                  | 1.56E-01 | 3                  | 1.56E-01 | 1                  | 5.05E-01 | 1                  | 5.05E-01 | 2                  | 6.42E-01 | 2                  | 6.42E-01 |
| P4HA1    | 10  | 1                  | 7.46E-01 | 1                  | 7.46E-01 | 1                  | 5.05E-01 | 1                  | 5.05E-01 |                    |          |                    |          |
| KLHL31   | 6   | 2                  | 2.23E-01 | 2                  | 2.23E-01 | 1                  | 5.05E-01 | 1                  | 5.05E-01 | 2                  | 6.29E-01 | 2                  | 6.29E-01 |
| ARHGAP27 | 17  | 2                  | 6.30E-01 | 3                  | 2.92E-01 | 1                  | 5.05E-01 | 2                  | 5.98E-01 | 1                  | 6.29E-01 | 2                  | 8.40E-01 |
| AP3B1    | 5   | 1                  | 7.46E-01 | 1                  | 7.46E-01 | 1                  | 5.05E-01 | 1                  | 5.05E-01 |                    |          |                    |          |
| FAM174B  | 15  | 1                  | 7.46E-01 | 1                  | 7.46E-01 | 1                  | 5.05E-01 | 1                  | 5.05E-01 |                    |          |                    |          |
| FAM89B   | 11  | 1                  | 7.46E-01 | 1                  | 7.46E-01 | 1                  | 5.05E-01 | 1                  | 5.05E-01 |                    |          |                    |          |
| LIMD2    | 17  | 1                  | 7.46E-01 | 1                  | 7.46E-01 | 1                  | 5.05E-01 | 1                  | 5.05E-01 |                    |          |                    |          |
| PTRH1    | 9   | 1                  | 7.46E-01 | 1                  | 7.46E-01 | 1                  | 5.05E-01 | 1                  | 5.05E-01 |                    |          |                    |          |
| BTBD3    | 20  | 1                  | 7.59E-01 | 1                  | 7.59E-01 | 1                  | 5.05E-01 | 1                  | 5.05E-01 |                    |          |                    |          |
| OR10A3   | 11  | 1                  | 7.59E-01 | 1                  | 7.59E-01 | 1                  | 5.05E-01 | 1                  | 5.05E-01 |                    |          |                    |          |
| PC       | 11  | 1                  | 7.59E-01 | 1                  | 7.59E-01 | 1                  | 5.05E-01 | 1                  | 5.05E-01 |                    |          |                    |          |
| VPS13D   | 1   | 1                  | 7.59E-01 | 1                  | 7.59E-01 | 1                  | 5.05E-01 | 1                  | 5.05E-01 |                    |          |                    |          |
| DTNB     | 2   | 2                  | 4.00E-01 | 2                  | 4.00E-01 | 1                  | 5.05E-01 | 1                  | 5.05E-01 | 1                  | 6.10E-01 | 1                  | 6.10E-01 |
| SAAL1    | 11  | 1                  | 7.51E-01 | 1                  | 7.51E-01 | 1                  | 5.05E-01 | 1                  | 5.05E-01 |                    |          |                    |          |
| NIT1     | 1   | 1                  | 7.51E-01 | 1                  | 7.51E-01 | 1                  | 5.05E-01 | 1                  | 5.05E-01 |                    |          |                    |          |
| PTGDR    | 14  | 1                  | 7.51E-01 | 1                  | 7.51E-01 | 1                  | 5.05E-01 | 1                  | 5.05E-01 |                    |          |                    |          |
| HLCS     | 21  | 1                  | 7.51E-01 | 1                  | 7.51E-01 | 1                  | 5.05E-01 | 1                  | 5.05E-01 |                    |          |                    |          |
| GLIS2    | 16  | 1                  | 7.51E-01 | 1                  | 7.51E-01 | 1                  | 5.05E-01 | 1                  | 5.05E-01 |                    |          |                    |          |
| TOPAZ1   | 3   | 1                  | 7.10E-01 | 1                  | 7.10E-01 | 1                  | 1.00E+00 | 1                  | 1.00E+00 | 1                  | 5.05E-01 | 1                  | 5.05E-01 |
| APP      | 21  | 3                  | 4.25E-01 | 3                  | 4.25E-01 | 2                  | 5.05E-01 | 2                  | 5.05E-01 | 1                  | 6.60E-01 | 1                  | 6.60E-01 |
| SCN11A   | 3   | 6                  | 3.18E-01 | 6                  | 3.18E-01 | 3                  | 7.87E-01 | 3                  | 7.87E-01 | 3                  | 5.06E-01 | 3                  | 5.06E-01 |
| TMEM74B  | 20  | 1                  | 7.58E-01 | 1                  | 7.58E-01 | 1                  | 5.06E-01 | 1                  | 5.06E-01 |                    |          |                    |          |
| LCMT1    | 16  | 1                  | 7.58E-01 | 1                  | 7.58E-01 | 1                  | 5.06E-01 | 1                  | 5.06E-01 |                    |          |                    |          |
| PSMA1    | 11  | 1                  | 7.58E-01 | 1                  | 7.58E-01 | 1                  | 5.06E-01 | 1                  | 5.06E-01 |                    |          |                    |          |
| NELFB    | 9   | 1                  | 7.58E-01 | 1                  | 7.58E-01 | 1                  | 5.06E-01 | 1                  | 5.06E-01 |                    |          |                    |          |
| ZNF213   | 16  | 3                  | 4.96E-01 | 3                  | 4.96E-01 | 2                  | 7.00E-01 | 2                  | 7.00E-01 | 2                  | 5.06E-01 | 2                  | 5.06E-01 |
| SH3BGR2  | 6   | 2                  | 4.61E-01 | 2                  | 4.61E-01 | 1                  | 5.06E-01 | 1                  | 5.06E-01 | 1                  | 6.27E-01 | 1                  | 6.27E-01 |
| SDF4     | 1   | 3                  | 8.72E-03 | 3                  | 8.72E-03 |                    |          |                    |          | 3                  | 5.06E-01 | 3                  | 5.06E-01 |
| TCEA3    | 1   | 2                  | 4.15E-01 | 2                  | 4.15E-01 | 1                  | 5.06E-01 | 1                  | 5.06E-01 | 1                  | 5.99E-01 | 1                  | 5.99E-01 |

| SetID       | Chr | ADEH- vs NA        |          |                    |          | ADEH+ vs ADEH-     |          |                    |          | ADEH+ vs NA        |          |                    |          |
|-------------|-----|--------------------|----------|--------------------|----------|--------------------|----------|--------------------|----------|--------------------|----------|--------------------|----------|
|             |     | rarenovel          |          | all                |          | rarenovel          |          | all                |          | rarenovel          |          | all                |          |
|             |     | N variants in test | p-value  | N variants in test | p-value  | N variants in test | p-value  | N variants in test | p-value  | N variants in test | p-value  | N variants in test | p-value  |
| PRELP       | 1   | 1                  | 7.48E-01 | 1                  | 7.48E-01 | 1                  | 5.06E-01 | 1                  | 5.06E-01 |                    |          |                    |          |
| ZNF362      | 1   | 1                  | 7.48E-01 | 1                  | 7.48E-01 | 1                  | 5.06E-01 | 1                  | 5.06E-01 |                    |          |                    |          |
| PPFIA4      | 1   | 5                  | 7.15E-01 | 5                  | 7.15E-01 | 4                  | 5.06E-01 | 4                  | 5.06E-01 | 3                  | 5.69E-01 | 3                  | 5.69E-01 |
| AHDC1       | 1   | 3                  | 1.25E-01 | 3                  | 1.25E-01 | 3                  | 5.06E-01 | 3                  | 5.06E-01 | 2                  | 1.00E+00 | 2                  | 1.00E+00 |
| GREB1       | 2   | 7                  | 5.18E-01 | 7                  | 5.18E-01 | 5                  | 6.95E-01 | 5                  | 6.95E-01 | 4                  | 5.06E-01 | 4                  | 5.06E-01 |
| ZFAT        | 8   | 6                  | 3.78E-01 | 6                  | 3.78E-01 | 4                  | 1.00E+00 | 4                  | 1.00E+00 | 3                  | 5.06E-01 | 3                  | 5.06E-01 |
| AK2         | 1   | 1                  | 7.53E-01 | 1                  | 7.53E-01 | 1                  | 5.06E-01 | 1                  | 5.06E-01 |                    |          |                    |          |
| RAD50       | 5   | 2                  | 4.63E-01 | 2                  | 4.63E-01 | 1                  | 5.06E-01 | 1                  | 5.06E-01 | 1                  | 6.22E-01 | 1                  | 6.22E-01 |
| SEMA4F      | 2   | 1                  | 7.53E-01 | 1                  | 7.53E-01 | 1                  | 5.06E-01 | 1                  | 5.06E-01 |                    |          |                    |          |
| HESX1       | 3   | 1                  | 7.53E-01 | 1                  | 7.53E-01 | 1                  | 5.06E-01 | 1                  | 5.06E-01 |                    |          |                    |          |
| C3orf22     | 3   | 1                  | 7.53E-01 | 1                  | 7.53E-01 | 1                  | 5.06E-01 | 1                  | 5.06E-01 |                    |          |                    |          |
| CHMP2A      | 19  | 1                  | 7.53E-01 | 1                  | 7.53E-01 | 1                  | 5.06E-01 | 1                  | 5.06E-01 |                    |          |                    |          |
| JADE1       | 4   | 1                  | 7.46E-01 | 1                  | 7.46E-01 | 1                  | 5.06E-01 | 1                  | 5.06E-01 |                    |          |                    |          |
| LRRC42      | 1   | 2                  | 4.08E-01 | 2                  | 4.08E-01 | 1                  | 5.06E-01 | 1                  | 5.06E-01 | 1                  | 6.09E-01 | 1                  | 6.09E-01 |
| AP4B1       | 1   | 2                  | 3.16E-01 | 2                  | 3.16E-01 | 1                  | 5.06E-01 | 1                  | 5.06E-01 | 1                  | 6.43E-01 | 1                  | 6.43E-01 |
| DEFB128     | 20  | 1                  | 7.46E-01 | 1                  | 7.46E-01 | 1                  | 5.06E-01 | 1                  | 5.06E-01 |                    |          |                    |          |
| NF1         | 17  | 1                  | 7.46E-01 | 1                  | 7.46E-01 | 1                  | 5.06E-01 | 1                  | 5.06E-01 |                    |          |                    |          |
| C12orf74    | 12  | 1                  | 7.46E-01 | 1                  | 7.46E-01 | 1                  | 5.06E-01 | 1                  | 5.06E-01 |                    |          |                    |          |
| C16orf72    | 16  | 1                  | 7.46E-01 | 1                  | 7.46E-01 | 1                  | 5.06E-01 | 1                  | 5.06E-01 |                    |          |                    |          |
| CPA2        | 7   | 1                  | 7.61E-01 | 1                  | 7.61E-01 | 1                  | 5.06E-01 | 1                  | 5.06E-01 |                    |          |                    |          |
| OR7G1       | 19  | 2                  | 3.48E-01 | 2                  | 3.48E-01 | 1                  | 5.06E-01 | 1                  | 5.06E-01 | 1                  | 6.12E-01 | 1                  | 6.12E-01 |
| NKPD1       | 19  | 1                  | 7.61E-01 | 1                  | 7.61E-01 | 1                  | 5.06E-01 | 1                  | 5.06E-01 |                    |          |                    |          |
| ORC5        | 7   | 2                  | 3.40E-01 | 2                  | 3.40E-01 | 1                  | 5.06E-01 | 1                  | 5.06E-01 | 1                  | 6.28E-01 | 1                  | 6.28E-01 |
| SNRNP70     | 19  | 1                  | 7.61E-01 | 1                  | 7.61E-01 | 1                  | 5.06E-01 | 1                  | 5.06E-01 |                    |          |                    |          |
| KLRC4-KLRK1 | 12  | 1                  | 7.61E-01 | 1                  | 7.61E-01 | 1                  | 5.06E-01 | 1                  | 5.06E-01 |                    |          |                    |          |
| KLRK1       | 12  | 1                  | 7.61E-01 | 1                  | 7.61E-01 | 1                  | 5.06E-01 | 1                  | 5.06E-01 |                    |          |                    |          |
| MOB3A       | 19  | 1                  | 7.61E-01 | 1                  | 7.61E-01 | 1                  | 5.06E-01 | 1                  | 5.06E-01 |                    |          |                    |          |
| CNR2        | 1   | 1                  | 7.49E-01 | 1                  | 7.49E-01 | 1                  | 5.06E-01 | 1                  | 5.06E-01 |                    |          |                    |          |
| IRX5        | 16  | 1                  | 7.49E-01 | 1                  | 7.49E-01 | 1                  | 5.06E-01 | 1                  | 5.06E-01 |                    |          |                    |          |
| LMBR1L      | 12  | 1                  | 7.49E-01 | 1                  | 7.49E-01 | 1                  | 5.06E-01 | 1                  | 5.06E-01 |                    |          |                    |          |
| TPRA1       | 3   | 2                  | 2.72E-01 | 2                  | 2.72E-01 | 1                  | 5.06E-01 | 1                  | 5.06E-01 | 2                  | 6.39E-01 | 2                  | 6.39E-01 |
| TTC39B      | 9   | 2                  | 3.94E-01 | 2                  | 3.94E-01 | 1                  | 5.06E-01 | 1                  | 5.06E-01 | 1                  | 6.29E-01 | 1                  | 6.29E-01 |
| ANTXR1      | 2   | 2                  | 4.29E-01 | 2                  | 4.29E-01 | 1                  | 5.06E-01 | 1                  | 5.06E-01 | 1                  | 6.63E-01 | 1                  | 6.63E-01 |
| LZTR1       | 22  | 1                  | 7.49E-01 | 1                  | 7.49E-01 | 1                  | 5.06E-01 | 1                  | 5.06E-01 |                    |          |                    |          |
| WBP4        | 13  | 1                  | 7.49E-01 | 1                  | 7.49E-01 | 1                  | 5.06E-01 | 1                  | 5.06E-01 |                    |          |                    |          |
| AFF3        | 2   | 1                  | 7.60E-01 | 1                  | 7.60E-01 | 1                  | 5.06E-01 | 1                  | 5.06E-01 |                    |          |                    |          |
| ZP2         | 16  | 1                  | 7.60E-01 | 1                  | 7.60E-01 | 1                  | 5.06E-01 | 1                  | 5.06E-01 |                    |          |                    |          |
| SNX18       | 5   | 2                  | 4.41E-01 | 2                  | 4.41E-01 | 1                  | 5.06E-01 | 1                  | 5.06E-01 | 1                  | 5.79E-01 | 1                  | 5.79E-01 |
| KIF1A       | 2   | 3                  | 1.79E-01 | 3                  | 1.79E-01 | 1                  | 5.06E-01 | 1                  | 5.06E-01 | 2                  | 6.37E-01 | 2                  | 6.37E-01 |
| SBSN        | 19  | 2                  | 4.39E-01 | 2                  | 4.39E-01 | 1                  | 5.06E-01 | 1                  | 5.06E-01 | 1                  | 6.31E-01 | 1                  | 6.31E-01 |
| LY9         | 1   | 1                  | 7.60E-01 | 1                  | 7.60E-01 | 1                  | 5.06E-01 | 1                  | 5.06E-01 |                    |          |                    |          |
| PRDM8       | 4   | 1                  | 7.60E-01 | 1                  | 7.60E-01 | 1                  | 5.06E-01 | 1                  | 5.06E-01 |                    |          |                    |          |
| RHEBL1      | 12  | 1                  | 7.60E-01 | 1                  | 7.60E-01 | 1                  | 5.06E-01 | 1                  | 5.06E-01 |                    |          |                    |          |
| C8orf82     | 8   | 2                  | 6.37E-01 | 2                  | 6.37E-01 | 1                  | 5.07E-01 | 1                  | 5.07E-01 | 1                  | 5.28E-01 | 1                  | 5.28E-01 |
| ANGPT4      | 20  | 1                  | 7.48E-01 | 1                  | 7.48E-01 | 1                  | 5.07E-01 | 1                  | 5.07E-01 |                    |          |                    |          |
| FBXW12      | 3   | 1                  | 7.48E-01 | 1                  | 7.48E-01 | 1                  | 5.07E-01 | 1                  | 5.07E-01 |                    |          |                    |          |
| ETV5        | 3   | 2                  | 3.86E-01 | 2                  | 3.86E-01 | 1                  | 5.07E-01 | 1                  | 5.07E-01 | 1                  | 6.37E-01 | 1                  | 6.37E-01 |
| DHCR24      | 1   | 2                  | 4.48E-01 | 2                  | 4.48E-01 | 1                  | 5.07E-01 | 1                  | 5.07E-01 | 1                  | 6.29E-01 | 1                  | 6.29E-01 |

| SetID    | Chr | ADEH- vs NA        |          |                    |          | ADEH+ vs ADEH-     |          |                    |          | ADEH+ vs NA        |          |                    |          |
|----------|-----|--------------------|----------|--------------------|----------|--------------------|----------|--------------------|----------|--------------------|----------|--------------------|----------|
|          |     | rare novel         |          | all                |          | rare novel         |          | all                |          | rare novel         |          | all                |          |
|          |     | N variants in test | p-value  | N variants in test | p-value  | N variants in test | p-value  | N variants in test | p-value  | N variants in test | p-value  | N variants in test | p-value  |
| FYCO1    | 3   | 6                  | 1.19E-01 | 6                  | 1.19E-01 | 5                  | 1.00E+00 | 5                  | 1.00E+00 | 5                  | 5.07E-01 | 5                  | 5.07E-01 |
| RASSF7   | 11  | 1                  | 7.48E-01 | 2                  | 6.69E-01 | 1                  | 5.07E-01 | 2                  | 1.00E+00 | 1                  |          | 1                  | 7.50E-01 |
| TTL1     | 22  | 1                  | 7.48E-01 | 1                  | 7.48E-01 | 1                  | 5.07E-01 | 1                  | 5.07E-01 | 1                  |          | 1                  |          |
| SLC35D3  | 6   | 2                  | 4.05E-01 | 2                  | 4.05E-01 | 1                  | 5.07E-01 | 1                  | 5.07E-01 | 1                  | 6.27E-01 | 1                  | 6.27E-01 |
| ACRBP    | 12  | 2                  | 4.14E-01 | 2                  | 4.14E-01 | 1                  | 5.07E-01 | 1                  | 5.07E-01 | 1                  | 5.99E-01 | 1                  | 5.99E-01 |
| TMEM206  | 1   | 1                  | 7.48E-01 | 1                  | 7.48E-01 | 1                  | 5.07E-01 | 1                  | 5.07E-01 | 1                  |          | 1                  |          |
| CYP11A1  | 15  | 1                  | 7.55E-01 | 1                  | 7.55E-01 | 1                  | 5.07E-01 | 1                  | 5.07E-01 | 1                  |          | 1                  |          |
| MTHFD2   | 2   | 1                  | 7.55E-01 | 1                  | 7.55E-01 | 1                  | 5.07E-01 | 1                  | 5.07E-01 | 1                  |          | 1                  |          |
| KCNA5    | 12  | 1                  | 7.62E-01 | 1                  | 7.62E-01 | 1                  | 5.07E-01 | 1                  | 5.07E-01 | 1                  |          | 1                  |          |
| OR6A2    | 11  | 2                  | 4.40E-01 | 2                  | 4.40E-01 | 1                  | 5.07E-01 | 1                  | 5.07E-01 | 1                  | 6.17E-01 | 1                  | 6.17E-01 |
| PLSCR1   | 3   | 1                  | 7.62E-01 | 1                  | 7.62E-01 | 1                  | 5.07E-01 | 1                  | 5.07E-01 | 1                  |          | 1                  |          |
| 3-Mar    | 5   | 1                  | 7.62E-01 | 1                  | 7.62E-01 | 1                  | 5.07E-01 | 1                  | 5.07E-01 | 1                  |          | 1                  |          |
| ZNF549   | 19  | 5                  | 1.26E-01 | 5                  | 1.26E-01 | 2                  | 6.59E-01 | 2                  | 6.59E-01 | 3                  | 5.07E-01 | 3                  | 5.07E-01 |
| TMCO6    | 5   | 1                  | 7.53E-01 | 1                  | 7.53E-01 | 1                  | 5.07E-01 | 1                  | 5.07E-01 | 1                  |          | 1                  |          |
| RAD17    | 5   | 1                  | 7.53E-01 | 2                  | 7.54E-01 | 1                  | 5.07E-01 | 2                  | 5.07E-01 | 1                  |          | 1                  | 1.00E+00 |
| PARBP    | 12  | 2                  | 3.72E-01 | 2                  | 3.72E-01 | 1                  | 5.07E-01 | 1                  | 5.07E-01 | 1                  | 6.30E-01 | 1                  | 6.30E-01 |
| MRPS7    | 17  | 1                  | 7.53E-01 | 1                  | 7.53E-01 | 1                  | 5.07E-01 | 1                  | 5.07E-01 | 1                  |          | 1                  |          |
| SERPINB6 | 6   | 2                  | 4.00E-01 | 2                  | 4.00E-01 | 1                  | 5.07E-01 | 1                  | 5.07E-01 | 1                  | 6.33E-01 | 1                  | 6.33E-01 |
| PRMT7    | 16  | 2                  | 6.28E-01 | 2                  | 6.28E-01 | 1                  | 5.07E-01 | 1                  | 5.07E-01 | 1                  | 5.28E-01 | 1                  | 5.28E-01 |
| ARHGAP31 | 3   | 1                  | 7.12E-01 | 1                  | 7.12E-01 | 1                  | 5.07E-01 | 1                  | 5.07E-01 | 1                  | 6.45E-01 | 1                  | 6.45E-01 |
| MRPL3    | 3   | 2                  | 2.76E-01 | 2                  | 2.76E-01 | 1                  | 5.07E-01 | 1                  | 5.07E-01 | 2                  | 6.37E-01 | 2                  | 6.37E-01 |
| RAB34    | 17  | 2                  | 5.69E-01 | 2                  | 5.69E-01 | 1                  | 5.07E-01 | 1                  | 5.07E-01 | 1                  | 5.67E-01 | 1                  | 5.67E-01 |
| NARR     | 17  | 1                  | 7.59E-01 | 1                  | 7.59E-01 | 1                  | 5.07E-01 | 1                  | 5.07E-01 | 1                  |          | 1                  |          |
| STC1     | 8   | 2                  | 4.12E-01 | 2                  | 4.12E-01 | 1                  | 5.07E-01 | 1                  | 5.07E-01 | 1                  | 6.18E-01 | 1                  | 6.18E-01 |
| DERA     | 12  | 1                  | 7.59E-01 | 1                  | 7.59E-01 | 1                  | 5.07E-01 | 1                  | 5.07E-01 | 1                  |          | 1                  |          |
| TMTC4    | 13  | 1                  | 7.55E-01 | 1                  | 7.55E-01 | 1                  | 5.07E-01 | 1                  | 5.07E-01 | 1                  |          | 1                  |          |
| CYB5D1   | 17  | 1                  | 7.55E-01 | 2                  | 8.66E-01 | 1                  | 5.07E-01 | 2                  | 6.08E-01 | 1                  |          | 1                  | 7.52E-01 |
| SIRT6    | 19  | 1                  | 7.55E-01 | 1                  | 7.55E-01 | 1                  | 5.07E-01 | 1                  | 5.07E-01 | 1                  |          | 1                  |          |
| NXPE3    | 3   | 1                  | 7.55E-01 | 1                  | 7.55E-01 | 1                  | 5.07E-01 | 1                  | 5.07E-01 | 1                  |          | 1                  |          |
| ANKH     | 5   | 1                  | 7.62E-01 | 1                  | 7.62E-01 | 1                  | 5.07E-01 | 1                  | 5.07E-01 | 1                  |          | 1                  |          |
| GNPTAB   | 12  | 1                  | 7.62E-01 | 1                  | 7.62E-01 | 1                  | 5.07E-01 | 1                  | 5.07E-01 | 1                  |          | 1                  |          |
| GHRHR    | 7   | 2                  | 3.71E-01 | 2                  | 3.71E-01 | 1                  | 5.07E-01 | 1                  | 5.07E-01 | 1                  | 6.28E-01 | 1                  | 6.28E-01 |
| ACSL6    | 5   | 1                  | 7.62E-01 | 1                  | 7.62E-01 | 1                  | 5.07E-01 | 1                  | 5.07E-01 | 1                  |          | 1                  |          |
| TET3     | 2   |                    |          | 1                  | 9.45E-01 |                    |          | 1                  | 5.20E-01 |                    |          | 1                  | 5.07E-01 |
| SOCS4    | 14  | 2                  | 3.90E-01 | 2                  | 3.90E-01 | 1                  | 5.07E-01 | 1                  | 5.07E-01 | 1                  | 6.34E-01 | 1                  | 6.34E-01 |
| DPYS     | 8   | 1                  | 7.56E-01 | 1                  | 7.56E-01 | 1                  | 5.07E-01 | 1                  | 5.07E-01 | 1                  |          | 1                  |          |
| TFDP1    | 13  | 1                  | 7.56E-01 | 1                  | 7.56E-01 | 1                  | 5.07E-01 | 1                  | 5.07E-01 | 1                  |          | 1                  |          |
| PTCD3    | 2   | 5                  | 6.26E-01 | 5                  | 6.26E-01 | 3                  | 5.94E-01 | 3                  | 5.94E-01 | 3                  | 5.07E-01 | 3                  | 5.07E-01 |
| CCR1     | 3   | 1                  | 7.58E-01 | 1                  | 7.58E-01 | 1                  | 5.07E-01 | 1                  | 5.07E-01 | 1                  |          | 1                  |          |
| BMP5     | 6   | 2                  | 3.60E-01 | 2                  | 3.60E-01 | 1                  | 5.07E-01 | 1                  | 5.07E-01 | 1                  | 6.30E-01 | 1                  | 6.30E-01 |
| FUT5     | 19  | 1                  | 7.30E-01 | 1                  | 7.30E-01 | 1                  | 5.07E-01 | 1                  | 5.07E-01 | 1                  | 5.17E-01 | 1                  | 5.17E-01 |
| EXOSC10  | 1   | 3                  | 7.04E-03 | 3                  | 7.04E-03 |                    |          |                    |          | 3                  | 5.07E-01 | 3                  | 5.07E-01 |
| C4orf26  | 4   | 2                  | 3.78E-01 | 2                  | 3.78E-01 | 1                  | 5.07E-01 | 1                  | 5.07E-01 | 1                  | 6.68E-01 | 1                  | 6.68E-01 |
| LRFN5    | 14  | 1                  | 7.36E-01 | 1                  | 7.36E-01 | 1                  | 5.07E-01 | 1                  | 5.07E-01 | 1                  |          | 1                  |          |
| PPP1R27  | 17  | 1                  | 6.34E-01 | 1                  | 6.34E-01 | 1                  | 5.07E-01 | 1                  | 5.07E-01 | 1                  | 5.37E-01 | 1                  | 5.37E-01 |
| CRISPLD1 | 8   | 1                  | 7.44E-01 | 1                  | 7.44E-01 | 1                  | 5.07E-01 | 1                  | 5.07E-01 | 1                  |          | 1                  |          |
| MIER3    | 5   | 1                  | 7.44E-01 | 1                  | 7.44E-01 | 1                  | 5.07E-01 | 1                  | 5.07E-01 | 1                  |          | 1                  |          |
| PNO1     | 2   | 1                  | 7.44E-01 | 1                  | 7.44E-01 | 1                  | 5.07E-01 | 1                  | 5.07E-01 | 1                  |          | 1                  |          |



| SetID    | Chr | ADEH- vs NA        |          |                    |          | ADEH+ vs ADEH-     |          |                    |          | ADEH+ vs NA        |          |                    |          |
|----------|-----|--------------------|----------|--------------------|----------|--------------------|----------|--------------------|----------|--------------------|----------|--------------------|----------|
|          |     | rarenovel          |          | all                |          | rarenovel          |          | all                |          | rarenovel          |          | all                |          |
|          |     | N variants in test | p-value  | N variants in test | p-value  | N variants in test | p-value  | N variants in test | p-value  | N variants in test | p-value  | N variants in test | p-value  |
| CCR8     | 3   | 1                  | 7.44E-01 | 1                  | 7.44E-01 | 1                  | 5.07E-01 | 1                  | 5.07E-01 |                    |          |                    |          |
| DBNDD1   | 16  | 1                  | 7.44E-01 | 1                  | 7.44E-01 | 1                  | 5.07E-01 | 1                  | 5.07E-01 |                    |          |                    |          |
| KIAA1462 | 10  | 6                  | 1.00E+00 | 6                  | 1.00E+00 | 5                  | 5.07E-01 | 5                  | 5.07E-01 | 2                  | 6.27E-01 | 2                  | 6.27E-01 |
| ADGRG7   | 3   | 6                  | 1.00E-01 | 6                  | 1.00E-01 | 3                  | 1.00E+00 | 3                  | 1.00E+00 | 4                  | 5.07E-01 | 4                  | 5.07E-01 |
| SLC27A3  | 1   | 2                  | 4.95E-01 | 2                  | 4.95E-01 | 1                  | 5.07E-01 | 1                  | 5.07E-01 | 1                  | 6.44E-01 | 1                  | 6.44E-01 |
| TMEM81   | 1   | 1                  | 7.49E-01 | 1                  | 7.49E-01 | 1                  | 5.07E-01 | 1                  | 5.07E-01 |                    |          |                    |          |
| OR52W1   | 11  | 1                  | 7.53E-01 | 2                  | 7.69E-01 | 1                  | 5.07E-01 | 2                  | 5.12E-01 |                    |          | 1                  | 1.00E+00 |
| GLYCTK   | 3   | 1                  | 7.53E-01 | 1                  | 7.53E-01 | 1                  | 5.07E-01 | 1                  | 5.07E-01 |                    |          |                    |          |
| YES1     | 18  | 1                  | 7.53E-01 | 1                  | 7.53E-01 | 1                  | 5.07E-01 | 1                  | 5.07E-01 |                    |          |                    |          |
| SF3B1    | 2   | 2                  | 3.48E-01 | 2                  | 3.48E-01 | 1                  | 5.07E-01 | 1                  | 5.07E-01 | 1                  | 5.95E-01 | 1                  | 5.95E-01 |
| KLC2     | 11  | 1                  | 7.53E-01 | 1                  | 7.53E-01 | 1                  | 5.07E-01 | 1                  | 5.07E-01 |                    |          |                    |          |
| DCDC1    | 11  | 1                  | 7.57E-01 | 1                  | 7.57E-01 | 1                  | 5.07E-01 | 1                  | 5.07E-01 |                    |          |                    |          |
| LANCL2   | 7   | 2                  | 3.50E-01 | 2                  | 3.50E-01 | 1                  | 5.07E-01 | 1                  | 5.07E-01 | 1                  | 6.01E-01 | 1                  | 6.01E-01 |
| CCNI     | 4   | 1                  | 7.57E-01 | 1                  | 7.57E-01 | 1                  | 5.07E-01 | 1                  | 5.07E-01 |                    |          |                    |          |
| MLX      | 17  | 1                  | 7.55E-01 | 1                  | 7.55E-01 | 1                  | 5.07E-01 | 1                  | 5.07E-01 |                    |          |                    |          |
| C1orf111 | 1   | 1                  | 7.55E-01 | 1                  | 7.55E-01 | 1                  | 5.07E-01 | 1                  | 5.07E-01 |                    |          |                    |          |
| MMD2     | 7   | 1                  | 7.55E-01 | 1                  | 7.55E-01 | 1                  | 5.07E-01 | 1                  | 5.07E-01 |                    |          |                    |          |
| OLFM1    | 9   | 1                  | 7.55E-01 | 1                  | 7.55E-01 | 1                  | 5.07E-01 | 1                  | 5.07E-01 |                    |          |                    |          |
| CBL      | 11  | 2                  | 4.49E-01 | 2                  | 4.49E-01 | 1                  | 5.07E-01 | 1                  | 5.07E-01 | 1                  | 5.17E-01 | 1                  | 5.17E-01 |
| CA12     | 15  | 1                  | 6.98E-01 | 1                  | 6.98E-01 | 1                  | 5.07E-01 | 1                  | 5.07E-01 | 1                  | 6.45E-01 | 1                  | 6.45E-01 |
| CENPB    | 20  | 1                  | 7.55E-01 | 1                  | 7.55E-01 | 1                  | 5.07E-01 | 1                  | 5.07E-01 |                    |          |                    |          |
| GINM1    | 6   | 1                  | 7.55E-01 | 1                  | 7.55E-01 | 1                  | 5.07E-01 | 1                  | 5.07E-01 |                    |          |                    |          |
| PHF20    | 20  | 7                  | 7.65E-01 | 7                  | 7.65E-01 | 5                  | 5.08E-01 | 5                  | 5.08E-01 | 2                  | 6.45E-01 | 2                  | 6.45E-01 |
| CEACAM16 | 19  | 4                  | 8.73E-01 | 4                  | 8.73E-01 | 3                  | 5.08E-01 | 3                  | 5.08E-01 | 2                  | 6.46E-01 | 2                  | 6.46E-01 |
| CDH22    | 20  | 4                  | 1.63E-01 | 4                  | 1.63E-01 | 1                  | 1.00E+00 | 1                  | 1.00E+00 | 3                  | 5.08E-01 | 3                  | 5.08E-01 |
| FAM184A  | 6   | 5                  | 5.39E-01 | 5                  | 5.39E-01 | 3                  | 8.30E-01 | 3                  | 8.30E-01 | 3                  | 5.08E-01 | 3                  | 5.08E-01 |
| PCDH15   | 10  | 6                  | 7.10E-01 | 6                  | 7.10E-01 | 4                  | 6.14E-01 | 4                  | 6.14E-01 | 3                  | 5.08E-01 | 3                  | 5.08E-01 |
| CHN2     | 7   | 1                  | 7.61E-01 | 1                  | 7.61E-01 | 1                  | 5.08E-01 | 1                  | 5.08E-01 |                    |          |                    |          |
| PPP4R3B  | 2   | 1                  | 7.61E-01 | 1                  | 7.61E-01 | 1                  | 5.08E-01 | 1                  | 5.08E-01 |                    |          |                    |          |
| ERICH2   | 2   | 1                  | 7.61E-01 | 1                  | 7.61E-01 | 1                  | 5.08E-01 | 1                  | 5.08E-01 |                    |          |                    |          |
| SLC25A20 | 3   | 3                  | 1.48E-01 | 3                  | 1.48E-01 | 1                  | 5.08E-01 | 1                  | 5.08E-01 | 2                  | 6.45E-01 | 2                  | 6.45E-01 |
| CLPTM1   | 19  | 1                  | 7.61E-01 | 1                  | 7.61E-01 | 1                  | 5.08E-01 | 1                  | 5.08E-01 |                    |          |                    |          |
| ATP6V0A4 | 7   | 1                  | 7.61E-01 | 1                  | 7.61E-01 | 1                  | 5.08E-01 | 1                  | 5.08E-01 |                    |          |                    |          |
| ZSCAN2   | 15  | 2                  | 7.43E-01 | 2                  | 7.43E-01 | 2                  | 5.08E-01 | 2                  | 5.08E-01 |                    |          |                    |          |
| FOXO6    | 1   | 1                  | 6.68E-01 | 1                  | 6.68E-01 | 1                  | 5.08E-01 | 1                  | 5.08E-01 | 1                  | 6.15E-01 | 1                  | 6.15E-01 |
| CLCA2    | 1   | 2                  | 4.87E-01 | 3                  | 4.87E-01 | 1                  | 5.08E-01 | 2                  | 5.09E-01 | 1                  | 6.05E-01 | 2                  | 6.06E-01 |
| PYCR2    | 1   | 1                  | 7.43E-01 | 1                  | 7.43E-01 | 1                  | 5.08E-01 | 1                  | 5.08E-01 |                    |          |                    |          |
| FAM3D    | 3   | 2                  | 2.84E-01 | 2                  | 2.84E-01 | 1                  | 5.08E-01 | 1                  | 5.08E-01 | 1                  | 6.20E-01 | 1                  | 6.20E-01 |
| ZBTB46   | 20  | 1                  | 7.60E-01 | 1                  | 7.60E-01 | 1                  | 5.08E-01 | 1                  | 5.08E-01 |                    |          |                    |          |
| GCM2     | 6   | 3                  | 2.16E-01 | 3                  | 2.16E-01 | 1                  | 5.08E-01 | 1                  | 5.08E-01 | 2                  | 6.42E-01 | 2                  | 6.42E-01 |
| POLR3G   | 5   | 1                  | 7.60E-01 | 1                  | 7.60E-01 | 1                  | 5.08E-01 | 1                  | 5.08E-01 |                    |          |                    |          |
| SDCBP2   | 20  | 6                  | 5.41E-01 | 8                  | 6.06E-01 | 4                  | 5.08E-01 | 6                  | 5.61E-01 | 5                  | 8.52E-01 | 7                  | 1.00E+00 |
| ADARB1   | 21  | 1                  | 7.58E-01 | 1                  | 7.58E-01 | 1                  | 5.09E-01 | 1                  | 5.09E-01 |                    |          |                    |          |
| MGAT2    | 14  | 1                  | 7.25E-01 | 1                  | 7.25E-01 | 1                  | 5.09E-01 | 1                  | 5.09E-01 | 1                  | 6.48E-01 | 1                  | 6.48E-01 |
| SLC18A2  | 10  | 3                  | 1.51E-01 | 3                  | 1.51E-01 | 1                  | 5.09E-01 | 1                  | 5.09E-01 | 2                  | 6.43E-01 | 2                  | 6.43E-01 |
| DCTPP1   | 16  | 1                  | 7.58E-01 | 1                  | 7.58E-01 | 1                  | 5.09E-01 | 1                  | 5.09E-01 |                    |          |                    |          |
| SEC24A   | 5   | 4                  | 5.86E-01 | 4                  | 5.86E-01 | 4                  | 5.09E-01 | 4                  | 5.09E-01 | 1                  | 6.43E-01 | 1                  | 6.43E-01 |
| ANKRD62  | 18  | 1                  | 7.53E-01 | 1                  | 7.53E-01 | 1                  | 5.09E-01 | 1                  | 5.09E-01 |                    |          |                    |          |

| SetID   | Chr | ADEH- vs NA        |          |                    |          | ADEH+ vs ADEH-     |          |                    |          | ADEH+ vs NA        |          |                    |          |
|---------|-----|--------------------|----------|--------------------|----------|--------------------|----------|--------------------|----------|--------------------|----------|--------------------|----------|
|         |     | rare novel         |          | all                |          | rare novel         |          | all                |          | rare novel         |          | all                |          |
|         |     | N variants in test | p-value  | N variants in test | p-value  | N variants in test | p-value  | N variants in test | p-value  | N variants in test | p-value  | N variants in test | p-value  |
| CR1     | 1   | 3                  | 1.63E-01 | 4                  | 1.63E-01 | 1                  | 5.09E-01 | 2                  | 5.15E-01 | 2                  | 6.25E-01 | 3                  | 6.27E-01 |
| SYK     | 9   | 1                  | 7.53E-01 | 1                  | 7.53E-01 | 1                  | 5.09E-01 | 1                  | 5.09E-01 |                    |          |                    |          |
| PDC     | 1   | 1                  | 7.53E-01 | 1                  | 7.53E-01 | 1                  | 5.09E-01 | 1                  | 5.09E-01 |                    |          |                    |          |
| RNF217  | 6   | 2                  | 4.15E-01 | 2                  | 4.15E-01 | 1                  | 5.09E-01 | 1                  | 5.09E-01 | 1                  | 6.23E-01 | 1                  | 6.23E-01 |
| FEZ2    | 2   | 2                  | 2.57E-01 | 2                  | 2.57E-01 | 1                  | 5.09E-01 | 1                  | 5.09E-01 | 2                  | 6.21E-01 | 2                  | 6.21E-01 |
| KCNK16  | 6   | 1                  | 1.54E-01 | 1                  | 1.54E-01 | 1                  | 5.09E-01 | 1                  | 5.09E-01 |                    |          |                    |          |
| FREM2   | 13  | 13                 | 7.02E-01 | 15                 | 8.00E-01 | 11                 | 5.99E-01 | 13                 | 7.44E-01 | 6                  | 5.09E-01 | 8                  | 6.81E-01 |
| ALPK2   | 18  | 9                  | 4.48E-03 | 11                 | 6.94E-03 | 9                  | 6.39E-01 | 11                 | 7.37E-01 | 4                  | 5.96E-01 | 6                  | 5.09E-01 |
| TMEM119 | 12  | 1                  | 6.96E-01 | 1                  | 6.96E-01 | 1                  | 5.09E-01 | 1                  | 5.09E-01 | 1                  | 6.50E-01 | 1                  | 6.50E-01 |
| FOXP2   | 7   | 1                  | 7.60E-01 | 1                  | 7.60E-01 | 1                  | 5.09E-01 | 1                  | 5.09E-01 |                    |          |                    |          |
| SMIM13  | 6   | 1                  | 7.60E-01 | 1                  | 7.60E-01 | 1                  | 5.09E-01 | 1                  | 5.09E-01 |                    |          |                    |          |
| ZNF324  | 19  | 1                  | 7.60E-01 | 1                  | 7.60E-01 | 1                  | 5.09E-01 | 1                  | 5.09E-01 |                    |          |                    |          |
| PTPRB   | 12  | 5                  | 6.61E-01 | 5                  | 6.61E-01 | 3                  | 5.18E-01 | 3                  | 5.18E-01 | 3                  | 5.09E-01 | 3                  | 5.09E-01 |
| CYP1A2  | 15  | 3                  | 5.91E-01 | 3                  | 5.91E-01 | 3                  | 5.09E-01 | 3                  | 5.09E-01 | 1                  | 6.34E-01 | 1                  | 6.34E-01 |
| CEMIP   | 15  | 1                  | 7.55E-01 | 1                  | 7.55E-01 | 1                  | 5.09E-01 | 1                  | 5.09E-01 |                    |          |                    |          |
| CDC6    | 17  | 1                  | 7.55E-01 | 1                  | 7.55E-01 | 1                  | 5.09E-01 | 1                  | 5.09E-01 |                    |          |                    |          |
| AGK     | 7   | 1                  | 7.55E-01 | 1                  | 7.55E-01 | 1                  | 5.09E-01 | 1                  | 5.09E-01 |                    |          |                    |          |
| PCP2    | 19  | 1                  | 7.55E-01 | 1                  | 7.55E-01 | 1                  | 5.09E-01 | 1                  | 5.09E-01 |                    |          |                    |          |
| ALPK3   | 15  | 9                  | 7.22E-01 | 10                 | 7.21E-01 | 5                  | 5.09E-01 | 6                  | 5.09E-01 | 6                  | 6.57E-01 | 7                  | 6.56E-01 |
| CRISP1  | 6   | 2                  | 3.98E-01 | 2                  | 3.98E-01 | 1                  | 5.09E-01 | 1                  | 5.09E-01 | 1                  | 5.73E-01 | 1                  | 5.73E-01 |
| MCM6    | 2   | 1                  | 7.46E-01 | 1                  | 7.46E-01 | 1                  | 5.09E-01 | 1                  | 5.09E-01 |                    |          |                    |          |
| ACBD4   | 17  | 1                  | 7.46E-01 | 1                  | 7.46E-01 | 1                  | 5.09E-01 | 1                  | 5.09E-01 |                    |          |                    |          |
| RNF31   | 14  | 2                  | 3.82E-01 | 2                  | 3.82E-01 | 1                  | 5.09E-01 | 1                  | 5.09E-01 | 1                  | 6.06E-01 | 1                  | 6.06E-01 |
| DEFB113 | 6   | 1                  | 7.46E-01 | 1                  | 7.46E-01 | 1                  | 5.09E-01 | 1                  | 5.09E-01 |                    |          |                    |          |
| HBB     | 11  | 1                  | 7.46E-01 | 1                  | 7.46E-01 | 1                  | 5.09E-01 | 1                  | 5.09E-01 |                    |          |                    |          |
| UQCC3   | 11  | 1                  | 7.46E-01 | 1                  | 7.46E-01 | 1                  | 5.09E-01 | 1                  | 5.09E-01 |                    |          |                    |          |
| TRIM44  | 11  | 1                  | 7.56E-01 | 1                  | 7.56E-01 | 1                  | 5.09E-01 | 1                  | 5.09E-01 |                    |          |                    |          |
| SEC62   | 3   | 1                  | 7.56E-01 | 1                  | 7.56E-01 | 1                  | 5.09E-01 | 1                  | 5.09E-01 |                    |          |                    |          |
| TBC1D9  | 4   | 3                  | 1.24E-01 | 3                  | 1.24E-01 | 1                  | 5.09E-01 | 1                  | 5.09E-01 | 2                  | 6.35E-01 | 2                  | 6.35E-01 |
| CPPED1  | 16  | 2                  | 3.76E-01 | 2                  | 3.76E-01 | 1                  | 5.09E-01 | 1                  | 5.09E-01 | 1                  | 6.55E-01 | 1                  | 6.55E-01 |
| GPHA2   | 11  | 1                  | 7.56E-01 | 1                  | 7.56E-01 | 1                  | 5.09E-01 | 1                  | 5.09E-01 |                    |          |                    |          |
| MEGF11  | 15  | 6                  | 8.44E-01 | 6                  | 8.44E-01 | 4                  | 5.40E-01 | 4                  | 5.40E-01 | 3                  | 5.09E-01 | 3                  | 5.09E-01 |
| FAM126B | 2   | 1                  | 7.51E-01 | 1                  | 7.51E-01 | 1                  | 5.09E-01 | 1                  | 5.09E-01 |                    |          |                    |          |
| LHFPL5  | 6   | 1                  | 7.51E-01 | 1                  | 7.51E-01 | 1                  | 5.09E-01 | 1                  | 5.09E-01 |                    |          |                    |          |
| DGKE    | 17  | 1                  | 7.51E-01 | 1                  | 7.51E-01 | 1                  | 5.10E-01 | 1                  | 5.10E-01 |                    |          |                    |          |
| FAXC    | 6   | 1                  | 7.51E-01 | 1                  | 7.51E-01 | 1                  | 5.10E-01 | 1                  | 5.10E-01 |                    |          |                    |          |
| TAF1A   | 1   | 1                  | 7.51E-01 | 1                  | 7.51E-01 | 1                  | 5.10E-01 | 1                  | 5.10E-01 |                    |          |                    |          |
| FAM221B | 9   | 1                  | 7.51E-01 | 1                  | 7.51E-01 | 1                  | 5.10E-01 | 1                  | 5.10E-01 |                    |          |                    |          |
| SPZ1    | 5   | 1                  | 7.51E-01 | 1                  | 7.51E-01 | 1                  | 5.10E-01 | 1                  | 5.10E-01 |                    |          |                    |          |
| SHISA4  | 1   | 1                  | 7.51E-01 | 1                  | 7.51E-01 | 1                  | 5.10E-01 | 1                  | 5.10E-01 |                    |          |                    |          |
| NEDD1   | 12  | 2                  | 3.92E-01 | 2                  | 3.92E-01 | 1                  | 5.10E-01 | 1                  | 5.10E-01 | 1                  | 6.30E-01 | 1                  | 6.30E-01 |
| SHC4    | 15  | 1                  | 7.51E-01 | 1                  | 7.51E-01 | 1                  | 5.10E-01 | 1                  | 5.10E-01 |                    |          |                    |          |
| CCDC124 | 19  | 1                  | 7.51E-01 | 1                  | 7.51E-01 | 1                  | 5.10E-01 | 1                  | 5.10E-01 |                    |          |                    |          |
| MAP3K8  | 10  | 1                  | 6.78E-01 | 1                  | 6.78E-01 | 1                  | 5.10E-01 | 1                  | 5.10E-01 | 1                  | 6.49E-01 | 1                  | 6.49E-01 |
| RADIL   | 7   | 6                  | 8.12E-01 | 6                  | 8.12E-01 | 4                  | 6.10E-01 | 4                  | 6.10E-01 | 3                  | 5.10E-01 | 3                  | 5.10E-01 |
| PDE4C   | 19  | 3                  | 8.37E-03 | 3                  | 8.37E-03 |                    |          |                    |          | 3                  | 5.10E-01 | 3                  | 5.10E-01 |
| MXRA7   | 17  | 1                  | 7.54E-01 | 1                  | 7.54E-01 | 1                  | 5.10E-01 | 1                  | 5.10E-01 |                    |          |                    |          |
| PROSER3 | 19  | 1                  | 7.54E-01 | 1                  | 7.54E-01 | 1                  | 5.10E-01 | 1                  | 5.10E-01 |                    |          |                    |          |

| SetID    | Chr | ADEH- vs NA        |          |                    |          | ADEH+ vs ADEH-     |          |                    |          | ADEH+ vs NA        |          |                    |          |
|----------|-----|--------------------|----------|--------------------|----------|--------------------|----------|--------------------|----------|--------------------|----------|--------------------|----------|
|          |     | rarenovel          |          | all                |          | rarenovel          |          | all                |          | rarenovel          |          | all                |          |
|          |     | N variants in test | p-value  | N variants in test | p-value  | N variants in test | p-value  | N variants in test | p-value  | N variants in test | p-value  | N variants in test | p-value  |
| NPBWR2   | 20  | 2                  | 4.13E-01 | 2                  | 4.13E-01 | 1                  | 5.10E-01 | 1                  | 5.10E-01 | 1                  | 6.06E-01 | 1                  | 6.06E-01 |
| SFRP5    | 10  | 1                  | 7.54E-01 | 1                  | 7.54E-01 | 1                  | 5.10E-01 | 1                  | 5.10E-01 |                    |          |                    |          |
| C11orf53 | 11  | 1                  | 7.54E-01 | 1                  | 7.54E-01 | 1                  | 5.10E-01 | 1                  | 5.10E-01 |                    |          |                    |          |
| C9orf57  | 9   | 1                  | 7.54E-01 | 1                  | 7.54E-01 | 1                  | 5.10E-01 | 1                  | 5.10E-01 |                    |          |                    |          |
| LPAR2    | 19  | 1                  | 7.55E-01 | 1                  | 7.55E-01 | 1                  | 5.10E-01 | 1                  | 5.10E-01 |                    |          |                    |          |
| SLC35C2  | 20  | 1                  | 7.55E-01 | 1                  | 7.55E-01 | 1                  | 5.10E-01 | 1                  | 5.10E-01 |                    |          |                    |          |
| ITGB1    | 10  | 2                  | 4.65E-01 | 2                  | 4.65E-01 | 1                  | 5.10E-01 | 1                  | 5.10E-01 | 1                  | 5.81E-01 | 1                  | 5.81E-01 |
| MTAP     | 9   | 1                  | 7.55E-01 | 1                  | 7.55E-01 | 1                  | 5.10E-01 | 1                  | 5.10E-01 |                    |          |                    |          |
| SS18L2   | 3   | 1                  | 7.55E-01 | 1                  | 7.55E-01 | 1                  | 5.10E-01 | 1                  | 5.10E-01 |                    |          |                    |          |
| IL20RB   | 3   | 1                  | 7.44E-01 | 1                  | 7.44E-01 | 1                  | 5.10E-01 | 1                  | 5.10E-01 |                    |          |                    |          |
| SIRT1    | 10  | 2                  | 5.12E-01 | 2                  | 5.12E-01 | 1                  | 5.10E-01 | 1                  | 5.10E-01 | 1                  | 6.32E-01 | 1                  | 6.32E-01 |
| RNF168   | 3   | 1                  | 7.44E-01 | 1                  | 7.44E-01 | 1                  | 5.10E-01 | 1                  | 5.10E-01 |                    |          |                    |          |
| CLSPN    | 1   | 1                  | 7.44E-01 | 1                  | 7.44E-01 | 1                  | 5.10E-01 | 1                  | 5.10E-01 |                    |          |                    |          |
| OXSM     | 3   | 1                  | 7.44E-01 | 1                  | 7.44E-01 | 1                  | 5.10E-01 | 1                  | 5.10E-01 |                    |          |                    |          |
| RCAN2    | 6   | 1                  | 7.44E-01 | 1                  | 7.44E-01 | 1                  | 5.10E-01 | 1                  | 5.10E-01 |                    |          |                    |          |
| C16orf78 | 16  | 4                  | 5.82E-01 | 4                  | 5.82E-01 | 4                  | 1.00E+00 | 4                  | 1.00E+00 | 3                  | 5.10E-01 | 3                  | 5.10E-01 |
| IFI44L   | 1   | 2                  | 2.88E-01 | 2                  | 2.88E-01 | 2                  | 1.00E+00 | 2                  | 1.00E+00 | 1                  | 5.10E-01 | 1                  | 5.10E-01 |
| C17orf80 | 17  | 4                  | 7.82E-01 | 4                  | 7.82E-01 | 3                  | 6.10E-01 | 3                  | 6.10E-01 | 3                  | 5.10E-01 | 3                  | 5.10E-01 |
| TMEM131  | 2   | 6                  | 7.09E-01 | 6                  | 7.09E-01 | 4                  | 5.85E-01 | 4                  | 5.85E-01 | 3                  | 5.10E-01 | 3                  | 5.10E-01 |
| FAM217A  | 6   | 5                  | 1.10E-01 | 5                  | 1.10E-01 | 3                  | 1.00E+00 | 3                  | 1.00E+00 | 4                  | 5.10E-01 | 4                  | 5.10E-01 |
| ANGEL2   | 1   | 1                  | 7.61E-01 | 1                  | 7.61E-01 | 1                  | 5.10E-01 | 1                  | 5.10E-01 |                    |          |                    |          |
| ZFYVE28  | 4   | 3                  | 1.31E-01 | 3                  | 1.31E-01 | 1                  | 5.10E-01 | 1                  | 5.10E-01 | 2                  | 6.33E-01 | 2                  | 6.33E-01 |
| JAKMIP1  | 4   | 2                  | 3.47E-01 | 2                  | 3.47E-01 | 1                  | 5.10E-01 | 1                  | 5.10E-01 | 1                  | 6.42E-01 | 1                  | 6.42E-01 |
| ISL2     | 15  | 1                  | 7.11E-01 | 1                  | 7.11E-01 | 1                  | 5.10E-01 | 1                  | 5.10E-01 | 1                  | 6.70E-01 | 1                  | 6.70E-01 |
| SLC25A22 | 11  | 1                  | 7.61E-01 | 1                  | 7.61E-01 | 1                  | 5.10E-01 | 1                  | 5.10E-01 |                    |          |                    |          |
| DEPDC1B  | 5   | 2                  | 4.44E-01 | 2                  | 4.44E-01 | 1                  | 5.10E-01 | 1                  | 5.10E-01 | 1                  | 6.42E-01 | 1                  | 6.42E-01 |
| ACSS2    | 20  | 1                  | 7.52E-01 | 1                  | 7.52E-01 | 1                  | 5.10E-01 | 1                  | 5.10E-01 |                    |          |                    |          |
| SLC35B3  | 6   | 1                  | 7.52E-01 | 1                  | 7.52E-01 | 1                  | 5.10E-01 | 1                  | 5.10E-01 |                    |          |                    |          |
| LAYN     | 11  | 1                  | 7.52E-01 | 1                  | 7.52E-01 | 1                  | 5.10E-01 | 1                  | 5.10E-01 |                    |          |                    |          |
| CXXC5    | 5   | 2                  | 4.62E-01 | 2                  | 4.62E-01 | 1                  | 5.10E-01 | 1                  | 5.10E-01 | 1                  | 6.56E-01 | 1                  | 6.56E-01 |
| ATP5G1   | 17  | 1                  | 7.52E-01 | 1                  | 7.52E-01 | 1                  | 5.10E-01 | 1                  | 5.10E-01 |                    |          |                    |          |
| FAM71E1  | 19  | 1                  | 7.26E-01 | 1                  | 7.26E-01 | 1                  | 5.11E-01 | 1                  | 5.11E-01 | 1                  | 5.88E-01 | 1                  | 5.88E-01 |
| WNT4     | 1   | 1                  | 7.59E-01 | 1                  | 7.59E-01 | 1                  | 5.11E-01 | 1                  | 5.11E-01 |                    |          |                    |          |
| LRTM2    | 12  | 1                  | 7.59E-01 | 2                  | 2.41E-01 | 1                  | 5.11E-01 | 2                  | 6.97E-01 |                    |          | 1                  | 1.00E+00 |
| FETUB    | 3   | 1                  | 7.59E-01 | 1                  | 7.59E-01 | 1                  | 5.11E-01 | 1                  | 5.11E-01 |                    |          |                    |          |
| RNASE11  | 14  | 1                  | 7.59E-01 | 1                  | 7.59E-01 | 1                  | 5.11E-01 | 1                  | 5.11E-01 |                    |          |                    |          |
| GPR137C  | 14  | 1                  | 7.59E-01 | 1                  | 7.59E-01 | 1                  | 5.11E-01 | 1                  | 5.11E-01 |                    |          |                    |          |
| CCDC159  | 19  | 4                  | 1.00E+00 | 4                  | 1.00E+00 | 4                  | 5.11E-01 | 4                  | 5.11E-01 | 2                  | 6.34E-01 | 2                  | 6.34E-01 |
| MS4A14   | 11  | 2                  | 4.95E-01 | 2                  | 4.95E-01 | 2                  | 5.11E-01 | 2                  | 5.11E-01 |                    |          |                    |          |
| ADNP2    | 18  | 2                  | 2.99E-01 | 2                  | 2.99E-01 | 1                  | 5.11E-01 | 1                  | 5.11E-01 | 1                  | 6.89E-01 | 1                  | 6.89E-01 |
| LMBRD2   | 5   | 1                  | 7.62E-01 | 1                  | 7.62E-01 | 1                  | 5.11E-01 | 1                  | 5.11E-01 |                    |          |                    |          |
| ARID4B   | 1   | 2                  | 4.48E-01 | 2                  | 4.48E-01 | 1                  | 5.11E-01 | 1                  | 5.11E-01 | 1                  | 6.29E-01 | 1                  | 6.29E-01 |
| KLRD1    | 12  | 1                  | 7.62E-01 | 1                  | 7.62E-01 | 1                  | 5.11E-01 | 1                  | 5.11E-01 |                    |          |                    |          |
| RNF113B  | 13  | 2                  | 4.69E-01 | 3                  | 5.42E-01 | 1                  | 5.11E-01 | 2                  | 8.77E-01 | 1                  | 5.77E-01 | 2                  | 7.87E-01 |
| CD276    | 15  | 1                  | 7.12E-01 | 1                  | 7.12E-01 | 1                  | 5.11E-01 | 1                  | 5.11E-01 | 1                  | 6.18E-01 | 1                  | 6.18E-01 |
| RFC2     | 7   | 1                  | 7.54E-01 | 1                  | 7.54E-01 | 1                  | 5.11E-01 | 1                  | 5.11E-01 |                    |          |                    |          |
| SOX7     | 8   | 1                  | 7.54E-01 | 1                  | 7.54E-01 | 1                  | 5.11E-01 | 1                  | 5.11E-01 |                    |          |                    |          |
| WNT7B    | 22  | 1                  | 7.54E-01 | 1                  | 7.54E-01 | 1                  | 5.11E-01 | 1                  | 5.11E-01 |                    |          |                    |          |

| SetID     | Chr | ADEH- vs NA        |          |                    |          | ADEH+ vs ADEH-     |          |                    |          | ADEH+ vs NA        |          |                    |          |
|-----------|-----|--------------------|----------|--------------------|----------|--------------------|----------|--------------------|----------|--------------------|----------|--------------------|----------|
|           |     | rarenovel          |          | all                |          | rarenovel          |          | all                |          | rarenovel          |          | all                |          |
|           |     | N variants in test | p-value  | N variants in test | p-value  | N variants in test | p-value  | N variants in test | p-value  | N variants in test | p-value  | N variants in test | p-value  |
| PREPL     | 2   | 2                  | 4.60E-01 | 2                  | 4.60E-01 | 1                  | 5.11E-01 | 1                  | 5.11E-01 | 1                  | 6.58E-01 | 1                  | 6.58E-01 |
| RABGAP1L  | 1   | 2                  | 3.90E-01 | 2                  | 3.90E-01 | 1                  | 5.11E-01 | 1                  | 5.11E-01 | 1                  | 6.11E-01 | 1                  | 6.11E-01 |
| PTPN7     | 1   | 2                  | 4.17E-01 | 2                  | 4.17E-01 | 1                  | 5.11E-01 | 1                  | 5.11E-01 | 1                  | 6.01E-01 | 1                  | 6.01E-01 |
| MCOLN1    | 19  | 1                  | 7.41E-01 | 1                  | 7.41E-01 | 1                  | 5.11E-01 | 1                  | 5.11E-01 |                    |          |                    |          |
| EIF3I     | 1   | 1                  | 7.41E-01 | 1                  | 7.41E-01 | 1                  | 5.11E-01 | 1                  | 5.11E-01 |                    |          |                    |          |
| RECQL     | 12  | 1                  | 7.41E-01 | 1                  | 7.41E-01 | 1                  | 5.11E-01 | 1                  | 5.11E-01 |                    |          |                    |          |
| RASGRF2   | 5   | 1                  | 7.58E-01 | 1                  | 7.58E-01 | 1                  | 5.11E-01 | 1                  | 5.11E-01 |                    |          |                    |          |
| TM4SF20   | 2   | 1                  | 7.58E-01 | 1                  | 7.58E-01 | 1                  | 5.11E-01 | 1                  | 5.11E-01 |                    |          |                    |          |
| SNRNP200  | 2   | 2                  | 4.92E-01 | 2                  | 4.92E-01 | 1                  | 5.11E-01 | 1                  | 5.11E-01 | 1                  | 6.41E-01 | 1                  | 6.41E-01 |
| WISP3     | 6   | 1                  | 7.58E-01 | 1                  | 7.58E-01 | 1                  | 5.11E-01 | 1                  | 5.11E-01 |                    |          |                    |          |
| ERICH4    | 19  | 1                  | 7.58E-01 | 1                  | 7.58E-01 | 1                  | 5.11E-01 | 1                  | 5.11E-01 |                    |          |                    |          |
| FBXL17    | 5   | 1                  | 7.58E-01 | 1                  | 7.58E-01 | 1                  | 5.11E-01 | 1                  | 5.11E-01 |                    |          |                    |          |
| PSMF1     | 20  | 1                  | 7.58E-01 | 1                  | 7.58E-01 | 1                  | 5.11E-01 | 1                  | 5.11E-01 |                    |          |                    |          |
| SASS6     | 1   | 1                  | 7.58E-01 | 1                  | 7.58E-01 | 1                  | 5.11E-01 | 1                  | 5.11E-01 |                    |          |                    |          |
| KCNAB2    | 1   | 3                  | 6.46E-03 | 3                  | 6.46E-03 |                    |          |                    |          | 3                  | 5.11E-01 | 3                  | 5.11E-01 |
| SHCBP1L   | 1   | 2                  | 1.00E+00 | 2                  | 1.00E+00 | 2                  | 5.11E-01 | 2                  | 5.11E-01 | 1                  | 6.64E-01 | 1                  | 6.64E-01 |
| DMRT2     | 9   | 5                  | 4.85E-01 | 6                  | 4.89E-01 | 3                  | 1.00E+00 | 4                  | 1.00E+00 | 4                  | 5.12E-01 | 5                  | 5.71E-01 |
| CAST      | 5   | 2                  | 3.25E-01 | 2                  | 3.25E-01 | 1                  | 5.12E-01 | 1                  | 5.12E-01 | 1                  | 7.00E-01 | 1                  | 7.00E-01 |
| KRTAP26-1 | 21  | 1                  | 6.92E-01 | 2                  | 7.13E-01 | 1                  | 5.12E-01 | 2                  | 7.12E-01 | 1                  | 6.06E-01 | 2                  | 8.79E-01 |
| CCDC189   | 16  | 1                  | 7.06E-01 | 1                  | 7.06E-01 | 1                  | 5.12E-01 | 1                  | 5.12E-01 | 1                  | 5.99E-01 | 1                  | 5.99E-01 |
| BCAS1     | 20  | 3                  | 3.40E-01 | 4                  | 4.22E-01 | 3                  | 7.54E-01 | 4                  | 8.15E-01 |                    |          | 1                  | 5.12E-01 |
| PLEKHH1   | 14  | 6                  | 2.47E-01 | 7                  | 2.47E-01 | 4                  | 5.12E-01 | 5                  | 6.18E-01 | 3                  | 1.00E+00 | 4                  | 1.00E+00 |
| DCPS      | 11  | 3                  | 8.11E-01 | 3                  | 8.11E-01 | 2                  | 5.12E-01 | 2                  | 5.12E-01 | 2                  | 6.35E-01 | 2                  | 6.35E-01 |
| RUNX2     | 6   | 1                  | 7.62E-01 | 1                  | 7.62E-01 | 1                  | 5.12E-01 | 1                  | 5.12E-01 |                    |          |                    |          |
| CCL24     | 7   | 1                  | 7.62E-01 | 1                  | 7.62E-01 | 1                  | 5.12E-01 | 1                  | 5.12E-01 |                    |          |                    |          |
| FAM19A5   | 22  | 1                  | 7.62E-01 | 1                  | 7.62E-01 | 1                  | 5.12E-01 | 1                  | 5.12E-01 |                    |          |                    |          |
| IL37      | 2   | 1                  | 7.62E-01 | 1                  | 7.62E-01 | 1                  | 5.12E-01 | 1                  | 5.12E-01 |                    |          |                    |          |
| SMPD3     | 16  | 5                  | 6.79E-01 | 5                  | 6.79E-01 | 3                  | 8.12E-01 | 3                  | 8.12E-01 | 3                  | 5.12E-01 | 3                  | 5.12E-01 |
| TMTC1     | 12  | 6                  | 6.00E-01 | 6                  | 6.00E-01 | 5                  | 5.12E-01 | 5                  | 5.12E-01 | 1                  | 6.27E-01 | 1                  | 6.27E-01 |
| NPC1      | 18  | 2                  | 4.09E-01 | 2                  | 4.09E-01 | 1                  | 5.12E-01 | 1                  | 5.12E-01 | 1                  | 6.04E-01 | 1                  | 6.04E-01 |
| OR5B2     | 11  | 3                  | 1.59E-01 | 3                  | 1.59E-01 | 1                  | 5.12E-01 | 1                  | 5.12E-01 | 2                  | 6.48E-01 | 2                  | 6.48E-01 |
| NETO1     | 18  | 1                  | 7.50E-01 | 1                  | 7.50E-01 | 1                  | 5.12E-01 | 1                  | 5.12E-01 |                    |          |                    |          |
| SMC1B     | 22  | 1                  | 7.50E-01 | 2                  | 8.74E-01 | 1                  | 5.12E-01 | 2                  | 1.00E+00 |                    |          | 1                  | 1.00E+00 |
| TRIM55    | 8   | 2                  | 4.14E-01 | 2                  | 4.14E-01 | 1                  | 5.12E-01 | 1                  | 5.12E-01 | 1                  | 6.28E-01 | 1                  | 6.28E-01 |
| VMP1      | 17  | 1                  | 7.50E-01 | 1                  | 7.50E-01 | 1                  | 5.12E-01 | 1                  | 5.12E-01 |                    |          |                    |          |
| WDR92     | 2   | 1                  | 7.50E-01 | 1                  | 7.50E-01 | 1                  | 5.12E-01 | 1                  | 5.12E-01 |                    |          |                    |          |
| ZNF568    | 19  | 6                  | 6.96E-01 | 8                  | 6.88E-01 | 4                  | 5.38E-01 | 6                  | 5.12E-01 | 3                  | 5.24E-01 | 5                  | 6.67E-01 |
| GRINA     | 8   | 1                  | 7.61E-01 | 1                  | 7.61E-01 | 1                  | 5.12E-01 | 1                  | 5.12E-01 |                    |          |                    |          |
| ACOT8     | 20  | 2                  | 3.41E-01 | 2                  | 3.41E-01 | 1                  | 5.12E-01 | 1                  | 5.12E-01 | 1                  | 6.25E-01 | 1                  | 6.25E-01 |
| VGF       | 7   | 1                  | 7.64E-01 | 1                  | 7.64E-01 | 1                  | 5.12E-01 | 1                  | 5.12E-01 |                    |          |                    |          |
| RERE      | 1   | 2                  | 3.00E-01 | 2                  | 3.00E-01 | 1                  | 5.12E-01 | 1                  | 5.12E-01 | 1                  | 7.02E-01 | 1                  | 7.02E-01 |
| PRKAR1B   | 7   | 2                  | 4.11E-01 | 2                  | 4.11E-01 | 1                  | 5.12E-01 | 1                  | 5.12E-01 | 1                  | 6.69E-01 | 1                  | 6.69E-01 |
| RUSC1     | 1   | 1                  | 7.61E-01 | 1                  | 7.61E-01 | 1                  | 5.12E-01 | 1                  | 5.12E-01 |                    |          |                    |          |
| MOSPD3    | 7   | 1                  | 7.61E-01 | 1                  | 7.61E-01 | 1                  | 5.12E-01 | 1                  | 5.12E-01 |                    |          |                    |          |
| LUC7L3    | 17  | 2                  | 3.90E-01 | 2                  | 3.90E-01 | 1                  | 5.12E-01 | 1                  | 5.12E-01 | 1                  | 6.42E-01 | 1                  | 6.42E-01 |
| CCDC97    | 19  | 1                  | 7.61E-01 | 1                  | 7.61E-01 | 1                  | 5.12E-01 | 1                  | 5.12E-01 |                    |          |                    |          |
| CD28      | 2   | 1                  | 7.61E-01 | 1                  | 7.61E-01 | 1                  | 5.12E-01 | 1                  | 5.12E-01 |                    |          |                    |          |
| CDA5      | 11  | 1                  | 6.44E-01 | 1                  | 6.44E-01 | 1                  | 5.12E-01 | 1                  | 5.12E-01 | 1                  | 6.20E-01 | 1                  | 6.20E-01 |

| SetID   | Chr | ADEH- vs NA        |          |                    |          | ADEH+ vs ADEH-     |          |                    |          | ADEH+ vs NA        |          |                    |          |
|---------|-----|--------------------|----------|--------------------|----------|--------------------|----------|--------------------|----------|--------------------|----------|--------------------|----------|
|         |     | rare novel         |          | all                |          | rare novel         |          | all                |          | rare novel         |          | all                |          |
|         |     | N variants in test | p-value  | N variants in test | p-value  | N variants in test | p-value  | N variants in test | p-value  | N variants in test | p-value  | N variants in test | p-value  |
| WDR93   | 15  | 1                  | 7.55E-01 | 1                  | 7.55E-01 | 1                  | 5.12E-01 | 1                  | 5.12E-01 |                    |          |                    |          |
| FAM169B | 15  | 1                  | 7.55E-01 | 1                  | 7.55E-01 | 1                  | 5.12E-01 | 1                  | 5.12E-01 |                    |          |                    |          |
| ZCRB1   | 12  | 1                  | 7.55E-01 | 1                  | 7.55E-01 | 1                  | 5.12E-01 | 1                  | 5.12E-01 |                    |          |                    |          |
| TAF9    | 5   | 1                  | 7.55E-01 | 1                  | 7.55E-01 | 1                  | 5.12E-01 | 1                  | 5.12E-01 |                    |          |                    |          |
| ARHGEF2 | 1   | 2                  | 7.55E-01 | 2                  | 7.55E-01 | 2                  | 5.12E-01 | 2                  | 5.12E-01 |                    |          |                    |          |
| FAM192A | 16  | 1                  | 7.55E-01 | 1                  | 7.55E-01 | 1                  | 5.12E-01 | 1                  | 5.12E-01 |                    |          |                    |          |
| WBP2    | 17  | 1                  | 7.55E-01 | 1                  | 7.55E-01 | 1                  | 5.12E-01 | 1                  | 5.12E-01 |                    |          |                    |          |
| PRKCE   | 2   | 1                  | 6.87E-01 | 1                  | 6.87E-01 | 1                  | 5.12E-01 | 1                  | 5.12E-01 | 1                  | 6.13E-01 | 1                  | 6.13E-01 |
| TOR2A   | 9   | 2                  | 3.16E-01 | 2                  | 3.16E-01 | 1                  | 5.12E-01 | 1                  | 5.12E-01 | 1                  | 6.82E-01 | 1                  | 6.82E-01 |
| BLMH    | 17  | 2                  | 3.39E-01 | 2                  | 3.39E-01 | 1                  | 5.12E-01 | 1                  | 5.12E-01 | 1                  | 6.01E-01 | 1                  | 6.01E-01 |
| CXCR6   | 3   | 1                  | 7.60E-01 | 1                  | 7.60E-01 | 1                  | 5.12E-01 | 1                  | 5.12E-01 |                    |          |                    |          |
| BRD9    | 5   | 1                  | 7.60E-01 | 1                  | 7.60E-01 | 1                  | 5.12E-01 | 1                  | 5.12E-01 |                    |          |                    |          |
| CLUL1   | 18  | 1                  | 7.60E-01 | 1                  | 7.60E-01 | 1                  | 5.12E-01 | 1                  | 5.12E-01 |                    |          |                    |          |
| SPEF2   | 5   | 10                 | 3.57E-01 | 10                 | 3.57E-01 | 10                 | 1.00E+00 | 10                 | 1.00E+00 | 4                  | 5.12E-01 | 4                  | 5.12E-01 |
| SMG9    | 19  | 1                  | 7.64E-01 | 1                  | 7.64E-01 | 1                  | 5.12E-01 | 1                  | 5.12E-01 |                    |          |                    |          |
| USP15   | 12  | 1                  | 7.64E-01 | 1                  | 7.64E-01 | 1                  | 5.12E-01 | 1                  | 5.12E-01 |                    |          |                    |          |
| PIGZ    | 3   | 1                  | 7.56E-01 | 1                  | 7.56E-01 | 1                  | 5.12E-01 | 1                  | 5.12E-01 |                    |          |                    |          |
| MTFR1   | 8   | 1                  | 7.56E-01 | 1                  | 7.56E-01 | 1                  | 5.12E-01 | 1                  | 5.12E-01 |                    |          |                    |          |
| BCL2L11 | 2   | 2                  | 4.23E-01 | 2                  | 4.23E-01 | 1                  | 5.13E-01 | 1                  | 5.13E-01 | 1                  | 6.10E-01 | 1                  | 6.10E-01 |
| MMADHC  | 2   | 2                  | 3.55E-01 | 2                  | 3.55E-01 | 1                  | 5.13E-01 | 1                  | 5.13E-01 | 1                  | 6.50E-01 | 1                  | 6.50E-01 |
| COX5A   | 15  | 1                  | 7.55E-01 | 1                  | 7.55E-01 | 1                  | 5.13E-01 | 1                  | 5.13E-01 |                    |          |                    |          |
| SLC17A5 | 6   | 3                  | 2.99E-01 | 3                  | 2.99E-01 | 2                  | 5.13E-01 | 2                  | 5.13E-01 | 1                  | 6.22E-01 | 1                  | 6.22E-01 |
| KRT33A  | 17  | 3                  | 3.60E-01 | 3                  | 3.60E-01 | 3                  | 1.00E+00 | 3                  | 1.00E+00 | 2                  | 5.13E-01 | 2                  | 5.13E-01 |
| PCK1    | 20  | 5                  | 1.55E-01 | 5                  | 1.55E-01 | 2                  | 5.74E-01 | 2                  | 5.74E-01 | 3                  | 5.13E-01 | 3                  | 5.13E-01 |
| STAM2   | 2   | 3                  | 1.22E-01 | 3                  | 1.22E-01 | 1                  | 5.13E-01 | 1                  | 5.13E-01 | 2                  | 6.45E-01 | 2                  | 6.45E-01 |
| XRCC2   | 7   | 1                  | 7.54E-01 | 1                  | 7.54E-01 | 1                  | 5.13E-01 | 1                  | 5.13E-01 |                    |          |                    |          |
| AGTPBP1 | 9   | 2                  | 4.17E-01 | 2                  | 4.17E-01 | 1                  | 5.13E-01 | 1                  | 5.13E-01 | 1                  | 6.51E-01 | 1                  | 6.51E-01 |
| DNA2    | 10  | 1                  | 7.54E-01 | 1                  | 7.54E-01 | 1                  | 5.13E-01 | 1                  | 5.13E-01 |                    |          |                    |          |
| PGC     | 6   | 1                  | 7.63E-01 | 1                  | 7.63E-01 | 1                  | 5.13E-01 | 1                  | 5.13E-01 |                    |          |                    |          |
| TMEM89  | 3   | 1                  | 7.63E-01 | 1                  | 7.63E-01 | 1                  | 5.13E-01 | 1                  | 5.13E-01 |                    |          |                    |          |
| PLEKHN1 | 1   | 2                  | 3.82E-01 | 2                  | 3.82E-01 | 1                  | 5.13E-01 | 1                  | 5.13E-01 | 1                  | 6.18E-01 | 1                  | 6.18E-01 |
| NFU1    | 2   | 1                  | 7.63E-01 | 1                  | 7.63E-01 | 1                  | 5.13E-01 | 1                  | 5.13E-01 |                    |          |                    |          |
| FNIP2   | 4   | 1                  | 7.60E-01 | 1                  | 7.60E-01 | 1                  | 5.13E-01 | 1                  | 5.13E-01 |                    |          |                    |          |
| OR11A1  | 6   | 1                  | 7.60E-01 | 1                  | 7.60E-01 | 1                  | 5.13E-01 | 1                  | 5.13E-01 |                    |          |                    |          |
| TMEM14A | 6   | 1                  | 7.60E-01 | 1                  | 7.60E-01 | 1                  | 5.13E-01 | 1                  | 5.13E-01 |                    |          |                    |          |
| ALKBH2  | 12  | 1                  | 7.60E-01 | 1                  | 7.60E-01 | 1                  | 5.13E-01 | 1                  | 5.13E-01 |                    |          |                    |          |
| LIN7C   | 11  | 1                  | 7.60E-01 | 1                  | 7.60E-01 | 1                  | 5.13E-01 | 1                  | 5.13E-01 |                    |          |                    |          |
| TTK     | 6   | 5                  | 5.48E-01 | 5                  | 5.48E-01 | 3                  | 6.89E-01 | 3                  | 6.89E-01 | 3                  | 5.14E-01 | 3                  | 5.14E-01 |
| HMGB2   | 4   | 1                  | 7.55E-01 | 1                  | 7.55E-01 | 1                  | 5.14E-01 | 1                  | 5.14E-01 |                    |          |                    |          |
| FAM228A | 2   | 1                  | 7.55E-01 | 1                  | 7.55E-01 | 1                  | 5.14E-01 | 1                  | 5.14E-01 |                    |          |                    |          |
| EHF     | 11  | 1                  | 7.55E-01 | 1                  | 7.55E-01 | 1                  | 5.14E-01 | 1                  | 5.14E-01 |                    |          |                    |          |
| TAOK1   | 17  | 1                  | 7.55E-01 | 1                  | 7.55E-01 | 1                  | 5.14E-01 | 1                  | 5.14E-01 |                    |          |                    |          |
| WDR59   | 16  | 1                  | 7.55E-01 | 1                  | 7.55E-01 | 1                  | 5.14E-01 | 1                  | 5.14E-01 |                    |          |                    |          |
| SKA2    | 17  | 1                  | 7.55E-01 | 1                  | 7.55E-01 | 1                  | 5.14E-01 | 1                  | 5.14E-01 |                    |          |                    |          |
| CWF19L2 | 11  | 6                  | 4.77E-01 | 6                  | 4.77E-01 | 5                  | 5.14E-01 | 5                  | 5.14E-01 | 1                  | 6.52E-01 | 1                  | 6.52E-01 |
| MLIP    | 6   | 3                  | 8.82E-03 | 3                  | 8.82E-03 |                    |          |                    |          | 3                  | 5.14E-01 | 3                  | 5.14E-01 |
| PDCD1   | 2   | 1                  | 7.50E-01 | 1                  | 7.50E-01 | 1                  | 5.14E-01 | 1                  | 5.14E-01 |                    |          |                    |          |
| EXD1    | 15  | 1                  | 7.50E-01 | 1                  | 7.50E-01 | 1                  | 5.14E-01 | 1                  | 5.14E-01 |                    |          |                    |          |

| SetID    | Chr | ADEH- vs NA        |          |                    |          | ADEH+ vs ADEH-     |          |                    |          | ADEH+ vs NA        |          |                    |          |
|----------|-----|--------------------|----------|--------------------|----------|--------------------|----------|--------------------|----------|--------------------|----------|--------------------|----------|
|          |     | rarenovel          |          | all                |          | rarenovel          |          | all                |          | rarenovel          |          | all                |          |
|          |     | N variants in test | p-value  | N variants in test | p-value  | N variants in test | p-value  | N variants in test | p-value  | N variants in test | p-value  | N variants in test | p-value  |
| HIST1H1C | 6   | 1                  | 7.50E-01 | 1                  | 7.50E-01 | 1                  | 5.14E-01 | 1                  | 5.14E-01 |                    |          |                    |          |
| PRRT4    | 7   | 2                  | 6.23E-01 | 2                  | 6.23E-01 | 1                  | 5.14E-01 | 1                  | 5.14E-01 | 1                  | 6.29E-01 | 1                  | 6.29E-01 |
| ZNF266   | 19  | 2                  | 3.52E-01 | 2                  | 3.52E-01 | 1                  | 5.14E-01 | 1                  | 5.14E-01 | 1                  | 6.33E-01 | 1                  | 6.33E-01 |
| SLTM     | 15  | 1                  | 7.57E-01 | 1                  | 7.57E-01 | 1                  | 5.14E-01 | 1                  | 5.14E-01 |                    |          |                    |          |
| CALML6   | 1   | 1                  | 7.14E-01 | 1                  | 7.14E-01 | 1                  | 5.14E-01 | 1                  | 5.14E-01 | 1                  | 6.28E-01 | 1                  | 6.28E-01 |
| PRPH     | 12  | 2                  | 4.35E-01 | 2                  | 4.35E-01 | 1                  | 5.14E-01 | 1                  | 5.14E-01 | 1                  | 6.18E-01 | 1                  | 6.18E-01 |
| C10orf76 | 10  | 1                  | 7.57E-01 | 1                  | 7.57E-01 | 1                  | 5.14E-01 | 1                  | 5.14E-01 |                    |          |                    |          |
| ZNF215   | 11  | 1                  | 7.49E-01 | 1                  | 7.49E-01 | 1                  | 5.14E-01 | 1                  | 5.14E-01 |                    |          |                    |          |
| PCDH7    | 4   | 2                  | 4.36E-01 | 2                  | 4.36E-01 | 1                  | 5.14E-01 | 1                  | 5.14E-01 | 1                  | 6.71E-01 | 1                  | 6.71E-01 |
| ANAPC7   | 12  | 1                  | 7.49E-01 | 1                  | 7.49E-01 | 1                  | 5.14E-01 | 1                  | 5.14E-01 |                    |          |                    |          |
| SSTR1    | 14  | 2                  | 4.61E-01 | 2                  | 4.61E-01 | 1                  | 5.14E-01 | 1                  | 5.14E-01 | 1                  | 6.64E-01 | 1                  | 6.64E-01 |
| SP1      | 12  | 1                  | 7.58E-01 | 1                  | 7.58E-01 | 1                  | 5.14E-01 | 1                  | 5.14E-01 |                    |          |                    |          |
| IRGQ     | 19  | 2                  | 5.06E-01 | 2                  | 5.06E-01 | 1                  | 5.14E-01 | 1                  | 5.14E-01 | 1                  | 6.34E-01 | 1                  | 6.34E-01 |
| TRHR     | 8   | 1                  | 6.91E-01 | 1                  | 6.91E-01 | 1                  | 5.14E-01 | 1                  | 5.14E-01 | 1                  | 6.47E-01 | 1                  | 6.47E-01 |
| GRIN2D   | 19  | 1                  | 7.58E-01 | 1                  | 7.58E-01 | 1                  | 5.14E-01 | 1                  | 5.14E-01 |                    |          |                    |          |
| C22orf29 | 22  | 1                  | 7.42E-01 | 1                  | 7.42E-01 | 1                  | 5.15E-01 | 1                  | 5.15E-01 |                    |          |                    |          |
| CHKB     | 22  | 1                  | 7.42E-01 | 1                  | 7.42E-01 | 1                  | 5.15E-01 | 1                  | 5.15E-01 |                    |          |                    |          |
| MTSS1L   | 16  | 1                  | 7.42E-01 | 1                  | 7.42E-01 | 1                  | 5.15E-01 | 1                  | 5.15E-01 |                    |          |                    |          |
| SRC      | 20  | 1                  | 7.42E-01 | 1                  | 7.42E-01 | 1                  | 5.15E-01 | 1                  | 5.15E-01 |                    |          |                    |          |
| KMT2A    | 11  | 2                  | 3.94E-01 | 2                  | 3.94E-01 | 1                  | 5.15E-01 | 1                  | 5.15E-01 | 1                  | 6.10E-01 | 1                  | 6.10E-01 |
| TNNT2    | 1   | 1                  | 7.58E-01 | 1                  | 7.58E-01 | 1                  | 5.15E-01 | 1                  | 5.15E-01 |                    |          |                    |          |
| PPP1R15A | 19  | 2                  | 3.36E-01 | 4                  | 2.94E-01 | 1                  | 5.15E-01 | 3                  | 7.71E-01 | 2                  | 6.40E-01 | 4                  | 1.00E+00 |
| STK4     | 20  | 1                  | 7.57E-01 | 1                  | 7.57E-01 | 1                  | 5.15E-01 | 1                  | 5.15E-01 |                    |          |                    |          |
| PTPN11   | 12  | 1                  | 7.57E-01 | 1                  | 7.57E-01 | 1                  | 5.15E-01 | 1                  | 5.15E-01 |                    |          |                    |          |
| ATP6VOD1 | 16  | 1                  | 7.57E-01 | 1                  | 7.57E-01 | 1                  | 5.15E-01 | 1                  | 5.15E-01 |                    |          |                    |          |
| A2ML1    | 12  | 4                  | 3.59E-01 | 5                  | 3.59E-01 | 3                  | 5.15E-01 | 4                  | 5.15E-01 | 1                  | 6.45E-01 | 2                  | 6.52E-01 |
| GPR135   | 14  | 1                  | 7.60E-01 | 1                  | 7.60E-01 | 1                  | 5.15E-01 | 1                  | 5.15E-01 |                    |          |                    |          |
| NEK8     | 17  | 3                  | 1.43E-01 | 3                  | 1.43E-01 | 1                  | 5.15E-01 | 1                  | 5.15E-01 | 2                  | 6.67E-01 | 2                  | 6.67E-01 |
| MPZL3    | 11  | 1                  | 7.43E-01 | 1                  | 7.43E-01 | 1                  | 5.15E-01 | 1                  | 5.15E-01 |                    |          |                    |          |
| 11-Mar   | 5   | 1                  | 7.43E-01 | 1                  | 7.43E-01 | 1                  | 5.15E-01 | 1                  | 5.15E-01 |                    |          |                    |          |
| BNIP1    | 5   | 1                  | 7.43E-01 | 1                  | 7.43E-01 | 1                  | 5.15E-01 | 1                  | 5.15E-01 |                    |          |                    |          |
| PARP9    | 3   | 1                  | 7.43E-01 | 1                  | 7.43E-01 | 1                  | 5.15E-01 | 1                  | 5.15E-01 |                    |          |                    |          |
| MCMBP    | 10  | 1                  | 7.43E-01 | 1                  | 7.43E-01 | 1                  | 5.15E-01 | 1                  | 5.15E-01 |                    |          |                    |          |
| CLK1     | 2   | 2                  | 5.33E-01 | 2                  | 5.33E-01 | 1                  | 5.15E-01 | 1                  | 5.15E-01 | 1                  | 6.42E-01 | 1                  | 6.42E-01 |
| NINJ2    | 12  | 1                  | 7.43E-01 | 1                  | 7.43E-01 | 1                  | 5.15E-01 | 1                  | 5.15E-01 |                    |          |                    |          |
| RBP2     | 3   | 1                  | 6.80E-01 | 1                  | 6.80E-01 | 1                  | 5.15E-01 | 1                  | 5.15E-01 | 1                  | 7.02E-01 | 1                  | 7.02E-01 |
| ARL6     | 3   | 1                  | 7.43E-01 | 1                  | 7.43E-01 | 1                  | 5.15E-01 | 1                  | 5.15E-01 |                    |          |                    |          |
| CYP1B1   | 2   | 3                  | 3.27E-01 | 3                  | 3.27E-01 | 2                  | 5.15E-01 | 2                  | 5.15E-01 | 1                  | 6.17E-01 | 1                  | 6.17E-01 |
| SLC6A6   | 3   | 1                  | 7.57E-01 | 1                  | 7.57E-01 | 1                  | 5.15E-01 | 1                  | 5.15E-01 |                    |          |                    |          |
| PLK3     | 1   | 1                  | 7.07E-01 | 1                  | 7.07E-01 | 1                  | 5.15E-01 | 1                  | 5.15E-01 | 1                  | 6.38E-01 | 1                  | 6.38E-01 |
| EGFR     | 7   | 1                  | 7.57E-01 | 1                  | 7.57E-01 | 1                  | 5.15E-01 | 1                  | 5.15E-01 |                    |          |                    |          |
| PBLD     | 10  | 1                  | 7.57E-01 | 1                  | 7.57E-01 | 1                  | 5.15E-01 | 1                  | 5.15E-01 |                    |          |                    |          |
| PPP2R5A  | 1   | 1                  | 7.57E-01 | 1                  | 7.57E-01 | 1                  | 5.15E-01 | 1                  | 5.15E-01 |                    |          |                    |          |
| CD58     | 1   | 1                  | 7.57E-01 | 1                  | 7.57E-01 | 1                  | 5.15E-01 | 1                  | 5.15E-01 |                    |          |                    |          |
| TENM2    | 5   | 14                 | 8.11E-01 | 14                 | 8.11E-01 | 11                 | 6.06E-01 | 11                 | 6.06E-01 | 6                  | 5.15E-01 | 6                  | 5.15E-01 |
| CFL2     | 14  | 1                  | 7.57E-01 | 1                  | 7.57E-01 | 1                  | 5.16E-01 | 1                  | 5.16E-01 |                    |          |                    |          |
| DNAJC30  | 7   | 1                  | 7.57E-01 | 1                  | 7.57E-01 | 1                  | 5.16E-01 | 1                  | 5.16E-01 |                    |          |                    |          |
| MRPS10   | 6   | 1                  | 7.57E-01 | 1                  | 7.57E-01 | 1                  | 5.16E-01 | 1                  | 5.16E-01 |                    |          |                    |          |

| SetID        | Chr | ADEH- vs NA        |          |                    |          | ADEH+ vs ADEH-     |          |                    |          | ADEH+ vs NA        |          |                    |          |
|--------------|-----|--------------------|----------|--------------------|----------|--------------------|----------|--------------------|----------|--------------------|----------|--------------------|----------|
|              |     | rarenovel          |          | all                |          | rarenovel          |          | all                |          | rarenovel          |          | all                |          |
|              |     | N variants in test | p-value  | N variants in test | p-value  | N variants in test | p-value  | N variants in test | p-value  | N variants in test | p-value  | N variants in test | p-value  |
| DKK4         | 8   | 1                  | 7.57E-01 | 1                  | 7.57E-01 | 1                  | 5.16E-01 | 1                  | 5.16E-01 |                    |          |                    |          |
| SLC22A9      | 11  | 3                  | 5.30E-01 | 3                  | 5.30E-01 | 3                  | 5.16E-01 | 3                  | 5.16E-01 | 1                  | 1.00E+00 | 1                  | 1.00E+00 |
| CRYGD        | 2   | 4                  | 1.00E+00 | 4                  | 1.00E+00 | 3                  | 5.16E-01 | 3                  | 5.16E-01 | 3                  | 6.56E-01 | 3                  | 6.56E-01 |
| TULP2        | 19  | 3                  | 7.46E-01 | 3                  | 7.46E-01 | 3                  | 5.16E-01 | 3                  | 5.16E-01 | 1                  | 6.44E-01 | 1                  | 6.44E-01 |
| FBXW8        | 12  | 2                  | 2.46E-01 | 2                  | 2.46E-01 | 1                  | 5.16E-01 | 1                  | 5.16E-01 | 2                  | 6.40E-01 | 2                  | 6.40E-01 |
| ZNF789       | 7   | 1                  | 7.28E-01 | 1                  | 7.28E-01 | 1                  | 5.16E-01 | 1                  | 5.16E-01 |                    |          |                    |          |
| ZHX1         | 8   | 1                  | 7.28E-01 | 1                  | 7.28E-01 | 1                  | 5.16E-01 | 1                  | 5.16E-01 |                    |          |                    |          |
| WSB1         | 17  | 1                  | 7.28E-01 | 1                  | 7.28E-01 | 1                  | 5.16E-01 | 1                  | 5.16E-01 |                    |          |                    |          |
| TCF4         | 18  | 2                  | 5.09E-01 | 2                  | 5.09E-01 | 1                  | 5.16E-01 | 1                  | 5.16E-01 | 1                  | 6.31E-01 | 1                  | 6.31E-01 |
| GALM         | 2   | 3                  | 1.27E-01 | 3                  | 1.27E-01 | 1                  | 5.16E-01 | 1                  | 5.16E-01 | 2                  | 6.28E-01 | 2                  | 6.28E-01 |
| C2orf72      | 2   | 1                  | 7.53E-01 | 1                  | 7.53E-01 | 1                  | 5.16E-01 | 1                  | 5.16E-01 |                    |          |                    |          |
| LMAN1        | 18  | 1                  | 7.53E-01 | 1                  | 7.53E-01 | 1                  | 5.16E-01 | 1                  | 5.16E-01 |                    |          |                    |          |
| GNAI3        | 1   | 2                  | 3.78E-01 | 2                  | 3.78E-01 | 1                  | 5.16E-01 | 1                  | 5.16E-01 | 1                  | 6.44E-01 | 1                  | 6.44E-01 |
| CCK          | 3   | 1                  | 7.53E-01 | 1                  | 7.53E-01 | 1                  | 5.16E-01 | 1                  | 5.16E-01 |                    |          |                    |          |
| ARHGEF28     | 5   | 7                  | 2.32E-01 | 8                  | 2.32E-01 | 8                  | 5.16E-01 | 9                  | 5.16E-01 | 5                  | 5.75E-01 | 6                  | 5.75E-01 |
| B3GNT5       | 3   | 1                  | 6.99E-01 | 1                  | 6.99E-01 | 1                  | 5.17E-01 | 1                  | 5.17E-01 | 1                  | 6.65E-01 | 1                  | 6.65E-01 |
| NDST3        | 4   | 1                  | 7.42E-01 | 1                  | 7.42E-01 | 1                  | 5.17E-01 | 1                  | 5.17E-01 |                    |          |                    |          |
| GGH          | 8   | 1                  | 7.42E-01 | 1                  | 7.42E-01 | 1                  | 5.17E-01 | 1                  | 5.17E-01 |                    |          |                    |          |
| GINS1        | 20  | 1                  | 7.42E-01 | 1                  | 7.42E-01 | 1                  | 5.17E-01 | 1                  | 5.17E-01 |                    |          |                    |          |
| TFCP2        | 12  | 1                  | 7.42E-01 | 1                  | 7.42E-01 | 1                  | 5.17E-01 | 1                  | 5.17E-01 |                    |          |                    |          |
| SNTG2        | 2   | 8                  | 7.65E-01 | 9                  | 7.68E-01 | 6                  | 1.00E+00 | 7                  | 1.00E+00 | 3                  | 5.69E-01 | 4                  | 5.17E-01 |
| NUDT13       | 10  | 3                  | 3.18E-02 | 3                  | 3.18E-02 | 1                  | 1.00E+00 | 1                  | 1.00E+00 | 3                  | 5.17E-01 | 3                  | 5.17E-01 |
| MFSO7        | 4   | 2                  | 2.24E-01 | 2                  | 2.24E-01 | 2                  | 5.17E-01 | 2                  | 5.17E-01 |                    |          |                    |          |
| TYW5         | 2   | 1                  | 7.48E-01 | 1                  | 7.48E-01 | 1                  | 5.17E-01 | 1                  | 5.17E-01 |                    |          |                    |          |
| AGAP1        | 2   | 2                  | 5.15E-01 | 2                  | 5.15E-01 | 1                  | 5.17E-01 | 1                  | 5.17E-01 | 1                  | 6.12E-01 | 1                  | 6.12E-01 |
| MYDGF        | 19  | 1                  | 7.48E-01 | 1                  | 7.48E-01 | 1                  | 5.17E-01 | 1                  | 5.17E-01 |                    |          |                    |          |
| LOC100996634 | 6   | 2                  | 3.98E-01 | 2                  | 3.98E-01 | 1                  | 5.17E-01 | 1                  | 5.17E-01 | 1                  | 5.82E-01 | 1                  | 5.82E-01 |
| IPO9         | 1   | 1                  | 7.48E-01 | 1                  | 7.48E-01 | 1                  | 5.17E-01 | 1                  | 5.17E-01 |                    |          |                    |          |
| COG3         | 13  | 2                  | 4.10E-01 | 2                  | 4.10E-01 | 1                  | 5.17E-01 | 1                  | 5.17E-01 | 1                  | 6.45E-01 | 1                  | 6.45E-01 |
| SERPINE2     | 2   | 1                  | 7.48E-01 | 1                  | 7.48E-01 | 1                  | 5.17E-01 | 1                  | 5.17E-01 |                    |          |                    |          |
| FAM177B      | 1   | 1                  | 7.48E-01 | 1                  | 7.48E-01 | 1                  | 5.17E-01 | 1                  | 5.17E-01 |                    |          |                    |          |
| GLTP         | 12  | 1                  | 7.48E-01 | 1                  | 7.48E-01 | 1                  | 5.17E-01 | 1                  | 5.17E-01 |                    |          |                    |          |
| HECTD2       | 10  | 1                  | 7.48E-01 | 1                  | 7.48E-01 | 1                  | 5.17E-01 | 1                  | 5.17E-01 |                    |          |                    |          |
| PPM1D        | 17  | 1                  | 7.48E-01 | 1                  | 7.48E-01 | 1                  | 5.17E-01 | 1                  | 5.17E-01 |                    |          |                    |          |
| PLEKHH2      | 2   | 4                  | 1.54E-01 | 4                  | 1.54E-01 | 4                  | 5.17E-01 | 4                  | 5.17E-01 |                    |          |                    |          |
| KDM4B        | 19  | 2                  | 2.15E-01 | 2                  | 2.15E-01 | 1                  | 5.17E-01 | 1                  | 5.17E-01 | 2                  | 6.37E-01 | 2                  | 6.37E-01 |
| AFAP1L1      | 5   | 6                  | 5.91E-01 | 6                  | 5.91E-01 | 5                  | 5.17E-01 | 5                  | 5.17E-01 | 1                  | 6.64E-01 | 1                  | 6.64E-01 |
| GNA13        | 17  | 1                  | 7.51E-01 | 1                  | 7.51E-01 | 1                  | 5.17E-01 | 1                  | 5.17E-01 |                    |          |                    |          |
| S100PBP      | 1   | 1                  | 7.51E-01 | 1                  | 7.51E-01 | 1                  | 5.17E-01 | 1                  | 5.17E-01 |                    |          |                    |          |
| LRIG3        | 12  | 1                  | 7.51E-01 | 1                  | 7.51E-01 | 1                  | 5.17E-01 | 1                  | 5.17E-01 |                    |          |                    |          |
| PTRH2        | 17  | 1                  | 7.51E-01 | 1                  | 7.51E-01 | 1                  | 5.17E-01 | 1                  | 5.17E-01 |                    |          |                    |          |
| DET1         | 15  | 2                  | 3.84E-01 | 2                  | 3.84E-01 | 1                  | 5.17E-01 | 1                  | 5.17E-01 | 1                  | 6.04E-01 | 1                  | 6.04E-01 |
| GP5          | 3   | 1                  | 7.51E-01 | 1                  | 7.51E-01 | 1                  | 5.17E-01 | 1                  | 5.17E-01 |                    |          |                    |          |
| NIPSNAP3A    | 9   | 1                  | 7.51E-01 | 1                  | 7.51E-01 | 1                  | 5.17E-01 | 1                  | 5.17E-01 |                    |          |                    |          |
| PI3          | 20  | 1                  | 7.51E-01 | 1                  | 7.51E-01 | 1                  | 5.17E-01 | 1                  | 5.17E-01 |                    |          |                    |          |
| VAT1L        | 16  | 2                  | 4.10E-01 | 2                  | 4.10E-01 | 1                  | 5.17E-01 | 1                  | 5.17E-01 | 1                  | 6.13E-01 | 1                  | 6.13E-01 |
| ZIM2         | 19  | 2                  | 4.86E-01 | 2                  | 4.86E-01 | 1                  | 5.17E-01 | 1                  | 5.17E-01 | 1                  | 6.17E-01 | 1                  | 6.17E-01 |
| USP28        | 11  | 1                  | 8.95E-02 | 1                  | 8.95E-02 |                    |          |                    |          | 1                  | 5.17E-01 | 1                  | 5.17E-01 |

| SetID    | Chr | ADEH- vs NA        |          |                    |          | ADEH+ vs ADEH-     |          |                    |          | ADEH+ vs NA        |          |                    |          |
|----------|-----|--------------------|----------|--------------------|----------|--------------------|----------|--------------------|----------|--------------------|----------|--------------------|----------|
|          |     | rarenovel          |          | all                |          | rarenovel          |          | all                |          | rarenovel          |          | all                |          |
|          |     | N variants in test | p-value  | N variants in test | p-value  | N variants in test | p-value  | N variants in test | p-value  | N variants in test | p-value  | N variants in test | p-value  |
| ASTN1    | 1   | 4                  | 7.43E-01 | 4                  | 7.43E-01 | 4                  | 8.36E-01 | 4                  | 8.36E-01 | 1                  | 5.17E-01 | 1                  | 5.17E-01 |
| DNM3     | 1   | 2                  | 4.00E-01 | 2                  | 4.00E-01 | 1                  | 5.51E-01 | 1                  | 5.51E-01 | 1                  | 5.17E-01 | 1                  | 5.17E-01 |
| MGP      | 12  | 1                  | 8.95E-02 | 1                  | 8.95E-02 |                    |          |                    |          | 1                  | 5.17E-01 | 1                  | 5.17E-01 |
| PMPCA    | 9   | 3                  | 4.85E-01 | 3                  | 4.85E-01 | 2                  | 7.63E-01 | 2                  | 7.63E-01 | 1                  | 5.17E-01 | 1                  | 5.17E-01 |
| ICA1     | 7   | 2                  | 7.42E-01 | 2                  | 7.42E-01 | 2                  | 5.82E-01 | 2                  | 5.82E-01 | 1                  | 5.17E-01 | 1                  | 5.17E-01 |
| CES5A    | 16  | 2                  | 9.04E-01 | 3                  | 8.62E-01 | 2                  | 5.89E-01 | 3                  | 5.56E-01 | 1                  | 5.17E-01 | 2                  | 5.91E-01 |
| CLEC1B   | 12  | 1                  | 8.95E-02 | 2                  | 8.41E-02 |                    |          | 1                  | 7.94E-01 | 1                  | 5.17E-01 | 2                  | 6.15E-01 |
| TMA16    | 4   | 1                  | 8.95E-02 | 1                  | 8.95E-02 |                    |          |                    |          | 1                  | 5.17E-01 | 1                  | 5.17E-01 |
| SEC22C   | 3   | 1                  | 8.95E-02 | 1                  | 8.95E-02 |                    |          |                    |          | 1                  | 5.17E-01 | 1                  | 5.17E-01 |
| SLC35F1  | 6   | 1                  | 8.95E-02 | 1                  | 8.95E-02 |                    |          |                    |          | 1                  | 5.17E-01 | 1                  | 5.17E-01 |
| AGMAT    | 1   | 3                  | 8.93E-01 | 3                  | 8.93E-01 | 3                  | 6.29E-01 | 3                  | 6.29E-01 | 1                  | 5.17E-01 | 1                  | 5.17E-01 |
| SLC8B1   | 12  | 2                  | 1.00E+00 | 2                  | 1.00E+00 | 2                  | 6.03E-01 | 2                  | 6.03E-01 | 1                  | 5.17E-01 | 1                  | 5.17E-01 |
| ARAP1    | 11  | 5                  | 1.58E-01 | 5                  | 1.58E-01 | 5                  | 5.17E-01 | 5                  | 5.17E-01 |                    |          |                    |          |
| NELL2    | 12  | 2                  | 2.06E-01 | 2                  | 2.06E-01 | 2                  | 5.18E-01 | 2                  | 5.18E-01 |                    |          |                    |          |
| PLEKHM2  | 1   | 4                  | 3.67E-02 | 4                  | 3.67E-02 | 1                  | 5.50E-01 | 1                  | 5.50E-01 | 3                  | 5.18E-01 | 3                  | 5.18E-01 |
| HSD17B14 | 19  | 5                  | 8.63E-01 | 5                  | 8.63E-01 | 3                  | 5.18E-01 | 3                  | 5.18E-01 | 5                  | 8.85E-01 | 5                  | 8.85E-01 |
| VWF      | 12  | 5                  | 3.44E-01 | 6                  | 6.28E-02 | 3                  | 1.00E+00 | 4                  | 1.00E+00 | 3                  | 1.00E+00 | 4                  | 5.18E-01 |
| ACSL5    | 10  | 2                  | 2.27E-01 | 2                  | 2.27E-01 | 2                  | 5.18E-01 | 2                  | 5.18E-01 |                    |          |                    |          |
| MUC7     | 4   | 1                  | 6.88E-01 | 1                  | 6.88E-01 | 1                  | 1.00E+00 | 1                  | 1.00E+00 | 1                  | 5.18E-01 | 1                  | 5.18E-01 |
| OSCAR    | 19  | 1                  | 7.58E-01 | 1                  | 7.58E-01 | 1                  | 5.18E-01 | 1                  | 5.18E-01 |                    |          |                    |          |
| SLCO5A1  | 8   | 1                  | 7.26E-01 | 1                  | 7.26E-01 | 1                  | 5.18E-01 | 1                  | 5.18E-01 | 1                  | 6.05E-01 | 1                  | 6.05E-01 |
| MAK      | 6   | 1                  | 7.58E-01 | 1                  | 7.58E-01 | 1                  | 5.18E-01 | 1                  | 5.18E-01 |                    |          |                    |          |
| KLHL25   | 15  | 4                  | 2.80E-01 | 4                  | 2.80E-01 | 2                  | 6.24E-01 | 2                  | 6.24E-01 | 3                  | 5.18E-01 | 3                  | 5.18E-01 |
| HIP1     | 7   | 3                  | 7.16E-01 | 3                  | 7.16E-01 | 2                  | 1.00E+00 | 2                  | 1.00E+00 | 3                  | 5.18E-01 | 3                  | 5.18E-01 |
| FHOD1    | 16  | 3                  | 2.87E-01 | 3                  | 2.87E-01 | 2                  | 5.18E-01 | 2                  | 5.18E-01 | 1                  | 6.46E-01 | 1                  | 6.46E-01 |
| MEA1     | 6   | 1                  | 7.58E-01 | 1                  | 7.58E-01 | 1                  | 5.18E-01 | 1                  | 5.18E-01 |                    |          |                    |          |
| SMAD6    | 15  | 2                  | 6.08E-01 | 2                  | 6.08E-01 | 1                  | 5.18E-01 | 1                  | 5.18E-01 | 1                  | 6.29E-01 | 1                  | 6.29E-01 |
| DCXR     | 17  | 1                  | 7.58E-01 | 1                  | 7.58E-01 | 1                  | 5.18E-01 | 1                  | 5.18E-01 |                    |          |                    |          |
| ZNF782   | 9   | 1                  | 7.58E-01 | 1                  | 7.58E-01 | 1                  | 5.18E-01 | 1                  | 5.18E-01 |                    |          |                    |          |
| ITGBL1   | 13  | 2                  | 4.37E-01 | 2                  | 4.37E-01 | 1                  | 5.18E-01 | 1                  | 5.18E-01 | 1                  | 6.18E-01 | 1                  | 6.18E-01 |
| OR6P1    | 1   | 2                  | 1.98E-01 | 3                  | 3.25E-01 | 2                  | 5.36E-01 | 3                  | 1.00E+00 |                    |          | 1                  | 5.18E-01 |
| MTMR10   | 15  | 1                  | 7.33E-01 | 1                  | 7.33E-01 | 1                  | 5.18E-01 | 1                  | 5.18E-01 |                    |          |                    |          |
| SDHAF3   | 7   | 1                  | 7.33E-01 | 1                  | 7.33E-01 | 1                  | 5.18E-01 | 1                  | 5.18E-01 |                    |          |                    |          |
| TAX1BP3  | 17  | 1                  | 7.48E-01 | 1                  | 7.48E-01 | 1                  | 5.18E-01 | 1                  | 5.18E-01 |                    |          |                    |          |
| FUZ      | 19  | 1                  | 7.48E-01 | 1                  | 7.48E-01 | 1                  | 5.18E-01 | 1                  | 5.18E-01 |                    |          |                    |          |
| ZDHHC17  | 12  | 1                  | 7.48E-01 | 1                  | 7.48E-01 | 1                  | 5.18E-01 | 1                  | 5.18E-01 |                    |          |                    |          |
| LACTB2   | 8   | 1                  | 7.48E-01 | 1                  | 7.48E-01 | 1                  | 5.18E-01 | 1                  | 5.18E-01 |                    |          |                    |          |
| REPS1    | 6   | 2                  | 3.98E-01 | 2                  | 3.98E-01 | 1                  | 5.18E-01 | 1                  | 5.18E-01 | 1                  | 6.49E-01 | 1                  | 6.49E-01 |
| PPP5C    | 19  | 2                  | 4.64E-01 | 2                  | 4.64E-01 | 1                  | 5.18E-01 | 1                  | 5.18E-01 | 1                  | 6.18E-01 | 1                  | 6.18E-01 |
| OR6K2    | 1   | 1                  | 7.48E-01 | 1                  | 7.48E-01 | 1                  | 5.18E-01 | 1                  | 5.18E-01 |                    |          |                    |          |
| N4BP1    | 16  | 1                  | 7.55E-01 | 1                  | 7.55E-01 | 1                  | 5.19E-01 | 1                  | 5.19E-01 |                    |          |                    |          |
| SRXN1    | 20  | 1                  | 7.55E-01 | 1                  | 7.55E-01 | 1                  | 5.19E-01 | 1                  | 5.19E-01 |                    |          |                    |          |
| SLC29A3  | 10  | 2                  | 6.19E-01 | 2                  | 6.19E-01 | 1                  | 5.19E-01 | 1                  | 5.19E-01 | 1                  | 6.29E-01 | 1                  | 6.29E-01 |
| SLC17A6  | 11  | 1                  | 7.54E-01 | 1                  | 7.54E-01 | 1                  | 5.19E-01 | 1                  | 5.19E-01 |                    |          |                    |          |
| IGF1R    | 15  | 1                  | 7.54E-01 | 1                  | 7.54E-01 | 1                  | 5.19E-01 | 1                  | 5.19E-01 |                    |          |                    |          |
| TMEM136  | 11  | 1                  | 7.54E-01 | 1                  | 7.54E-01 | 1                  | 5.19E-01 | 1                  | 5.19E-01 |                    |          |                    |          |
| B3GNT2   | 2   | 1                  | 7.54E-01 | 1                  | 7.54E-01 | 1                  | 5.19E-01 | 1                  | 5.19E-01 |                    |          |                    |          |
| ZNF462   | 9   | 9                  | 4.89E-01 | 9                  | 4.89E-01 | 6                  | 5.49E-01 | 6                  | 5.49E-01 | 4                  | 5.19E-01 | 4                  | 5.19E-01 |



| SetID    | Chr | ADEH- vs NA        |          |                    |          | ADEH+ vs ADEH-     |          |                    |          | ADEH+ vs NA        |          |                    |          |
|----------|-----|--------------------|----------|--------------------|----------|--------------------|----------|--------------------|----------|--------------------|----------|--------------------|----------|
|          |     | rare novel         |          | all                |          | rare novel         |          | all                |          | rare novel         |          | all                |          |
|          |     | N variants in test | p-value  | N variants in test | p-value  | N variants in test | p-value  | N variants in test | p-value  | N variants in test | p-value  | N variants in test | p-value  |
| CACNA1A  | 19  | 3                  | 1.28E-01 | 3                  | 1.28E-01 | 3                  | 5.19E-01 | 3                  | 5.19E-01 |                    |          |                    |          |
| DOCK4    | 7   | 9                  | 3.21E-02 | 9                  | 3.21E-02 | 6                  | 7.44E-01 | 6                  | 7.44E-01 | 7                  | 5.20E-01 | 7                  | 5.20E-01 |
| LEXM     | 1   | 6                  | 8.47E-02 | 7                  | 8.47E-02 | 3                  | 1.00E+00 | 4                  | 1.00E+00 | 5                  | 5.20E-01 | 6                  | 5.20E-01 |
| CELSR3   | 3   | 16                 | 9.61E-02 | 16                 | 9.61E-02 | 15                 | 5.20E-01 | 15                 | 5.20E-01 | 5                  | 5.53E-01 | 5                  | 5.53E-01 |
| XCR1     | 3   | 2                  | 3.61E-01 | 2                  | 3.61E-01 | 1                  | 5.20E-01 | 1                  | 5.20E-01 | 1                  | 6.18E-01 | 1                  | 6.18E-01 |
| TIGD2    | 4   | 4                  | 3.77E-01 | 5                  | 3.72E-01 | 3                  | 5.20E-01 | 4                  | 5.82E-01 | 1                  | 6.98E-01 | 2                  | 7.55E-01 |
| NPTX2    | 7   | 1                  | 6.84E-01 | 1                  | 6.84E-01 | 1                  | 5.20E-01 | 1                  | 5.20E-01 | 1                  | 6.65E-01 | 1                  | 6.65E-01 |
| FGF2     | 4   | 1                  | 7.49E-01 | 1                  | 7.49E-01 | 1                  | 5.20E-01 | 1                  | 5.20E-01 | 1                  | 6.08E-01 | 1                  | 6.08E-01 |
| WDR1     | 4   | 1                  | 7.59E-01 | 1                  | 7.59E-01 | 1                  | 5.20E-01 | 1                  | 5.20E-01 |                    |          |                    |          |
| CHRD     | 3   | 3                  | 3.28E-01 | 3                  | 3.28E-01 | 2                  | 5.21E-01 | 2                  | 5.21E-01 | 1                  | 6.17E-01 | 1                  | 6.17E-01 |
| CD300C   | 17  | 2                  | 7.32E-01 | 2                  | 7.32E-01 | 2                  | 1.00E+00 | 2                  | 1.00E+00 | 1                  | 5.21E-01 | 1                  | 5.21E-01 |
| SIM2     | 21  | 1                  | 7.61E-01 | 1                  | 7.61E-01 | 1                  | 5.21E-01 | 1                  | 5.21E-01 |                    |          |                    |          |
| GRAMD1B  | 11  | 2                  | 4.01E-01 | 2                  | 4.01E-01 | 1                  | 5.21E-01 | 1                  | 5.21E-01 | 1                  | 6.23E-01 | 1                  | 6.23E-01 |
| OR6N2    | 1   | 1                  | 7.61E-01 | 1                  | 7.61E-01 | 1                  | 5.21E-01 | 1                  | 5.21E-01 |                    |          |                    |          |
| PPP1R14D | 15  | 1                  | 7.61E-01 | 1                  | 7.61E-01 | 1                  | 5.21E-01 | 1                  | 5.21E-01 |                    |          |                    |          |
| TUBE1    | 6   | 2                  | 3.17E-01 | 2                  | 3.17E-01 | 1                  | 5.21E-01 | 1                  | 5.21E-01 | 1                  | 6.80E-01 | 1                  | 6.80E-01 |
| HOXD8    | 2   | 1                  | 7.61E-01 | 1                  | 7.61E-01 | 1                  | 5.21E-01 | 1                  | 5.21E-01 |                    |          |                    |          |
| SERPINI2 | 3   | 1                  | 7.56E-01 | 1                  | 7.56E-01 | 1                  | 5.21E-01 | 1                  | 5.21E-01 |                    |          |                    |          |
| SEMA4C   | 2   | 1                  | 7.56E-01 | 1                  | 7.56E-01 | 1                  | 5.21E-01 | 1                  | 5.21E-01 |                    |          |                    |          |
| CALB2    | 16  | 1                  | 7.56E-01 | 1                  | 7.56E-01 | 1                  | 5.21E-01 | 1                  | 5.21E-01 |                    |          |                    |          |
| TRIM23   | 5   | 1                  | 7.56E-01 | 1                  | 7.56E-01 | 1                  | 5.21E-01 | 1                  | 5.21E-01 |                    |          |                    |          |
| ST3GAL6  | 3   | 1                  | 7.56E-01 | 1                  | 7.56E-01 | 1                  | 5.21E-01 | 1                  | 5.21E-01 |                    |          |                    |          |
| ORMDL1   | 2   | 2                  | 4.69E-01 | 2                  | 4.69E-01 | 1                  | 5.21E-01 | 1                  | 5.21E-01 | 1                  | 6.19E-01 | 1                  | 6.19E-01 |
| ABHD12   | 20  | 2                  | 5.27E-01 | 2                  | 5.27E-01 | 1                  | 5.21E-01 | 1                  | 5.21E-01 | 1                  | 6.42E-01 | 1                  | 6.42E-01 |
| IGF2BP1  | 17  | 1                  | 7.48E-01 | 1                  | 7.48E-01 | 1                  | 5.21E-01 | 1                  | 5.21E-01 |                    |          |                    |          |
| STT3B    | 3   | 2                  | 4.75E-01 | 2                  | 4.75E-01 | 1                  | 5.21E-01 | 1                  | 5.21E-01 | 1                  | 6.72E-01 | 1                  | 6.72E-01 |
| TSSC4    | 11  | 1                  | 7.48E-01 | 1                  | 7.48E-01 | 1                  | 5.21E-01 | 1                  | 5.21E-01 |                    |          |                    |          |
| WWTR1    | 3   | 2                  | 3.85E-01 | 2                  | 3.85E-01 | 1                  | 5.21E-01 | 1                  | 5.21E-01 | 1                  | 6.38E-01 | 1                  | 6.38E-01 |
| KCNK6    | 19  | 3                  | 6.59E-01 | 3                  | 6.59E-01 | 2                  | 5.21E-01 | 2                  | 5.21E-01 | 1                  | 6.18E-01 | 1                  | 6.18E-01 |
| PCDH8    | 13  | 1                  | 7.57E-01 | 1                  | 7.57E-01 | 1                  | 5.21E-01 | 1                  | 5.21E-01 |                    |          |                    |          |
| MRPS28   | 8   | 1                  | 7.57E-01 | 1                  | 7.57E-01 | 1                  | 5.21E-01 | 1                  | 5.21E-01 |                    |          |                    |          |
| BFSP1    | 20  | 1                  | 7.57E-01 | 1                  | 7.57E-01 | 1                  | 5.21E-01 | 1                  | 5.21E-01 |                    |          |                    |          |
| NSRP1    | 17  | 2                  | 4.60E-01 | 3                  | 4.66E-01 | 1                  | 5.21E-01 | 2                  | 1.00E+00 | 1                  | 6.09E-01 | 2                  | 1.00E+00 |
| AGPAT2   | 9   | 1                  | 7.22E-01 | 1                  | 7.22E-01 | 1                  | 5.21E-01 | 1                  | 5.21E-01 | 1                  | 6.34E-01 | 1                  | 6.34E-01 |
| LINGO2   | 9   | 1                  | 7.39E-01 | 1                  | 7.39E-01 | 1                  | 5.21E-01 | 1                  | 5.21E-01 |                    |          |                    |          |
| SEH1L    | 18  | 3                  | 1.72E-01 | 3                  | 1.72E-01 | 1                  | 5.21E-01 | 1                  | 5.21E-01 | 2                  | 6.45E-01 | 2                  | 6.45E-01 |
| NT5E     | 6   | 2                  | 4.69E-01 | 2                  | 4.69E-01 | 1                  | 5.21E-01 | 1                  | 5.21E-01 | 1                  | 6.11E-01 | 1                  | 6.11E-01 |
| EIF3F    | 11  | 1                  | 7.39E-01 | 1                  | 7.39E-01 | 1                  | 5.21E-01 | 1                  | 5.21E-01 |                    |          |                    |          |
| ASTL     | 2   | 1                  | 6.95E-01 | 1                  | 6.95E-01 | 1                  | 5.21E-01 | 1                  | 5.21E-01 | 1                  | 1.00E+00 | 1                  | 1.00E+00 |
| TTC7B    | 14  | 5                  | 1.82E-01 | 5                  | 1.82E-01 | 5                  | 5.21E-01 | 5                  | 5.21E-01 |                    |          |                    |          |
| TOP3B    | 22  | 4                  | 2.40E-01 | 4                  | 2.40E-01 | 2                  | 5.21E-01 | 2                  | 5.21E-01 | 2                  | 6.45E-01 | 2                  | 6.45E-01 |
| PLEKHH3  | 17  | 1                  | 7.49E-01 | 1                  | 7.49E-01 | 1                  | 5.21E-01 | 1                  | 5.21E-01 |                    |          |                    |          |
| PTH1R    | 3   | 1                  | 7.49E-01 | 1                  | 7.49E-01 | 1                  | 5.21E-01 | 1                  | 5.21E-01 |                    |          |                    |          |
| RGL2     | 6   | 3                  | 4.79E-03 | 3                  | 4.79E-03 |                    |          |                    |          | 3                  | 5.21E-01 | 3                  | 5.21E-01 |
| SPATA8   | 15  | 1                  | 7.63E-01 | 2                  | 7.93E-01 | 1                  | 5.33E-01 | 2                  | 6.77E-01 |                    |          | 1                  | 5.21E-01 |
| AP5B1    | 11  |                    |          | 1                  | 1.61E-01 |                    |          | 1                  | 7.95E-01 |                    |          | 1                  | 5.22E-01 |
| DBT      | 1   | 1                  | 7.50E-01 | 1                  | 7.50E-01 | 1                  | 5.22E-01 | 1                  | 5.22E-01 |                    |          |                    |          |
| MEF2A    | 15  | 2                  | 3.65E-01 | 2                  | 3.65E-01 | 1                  | 5.22E-01 | 1                  | 5.22E-01 | 1                  | 5.37E-01 | 1                  | 5.37E-01 |

| SetID        | Chr | ADEH- vs NA        |          |                    |          | ADEH+ vs ADEH-     |          |                    |          | ADEH+ vs NA        |          |                    |          |
|--------------|-----|--------------------|----------|--------------------|----------|--------------------|----------|--------------------|----------|--------------------|----------|--------------------|----------|
|              |     | rare novel         |          | all                |          | rare novel         |          | all                |          | rare novel         |          | all                |          |
|              |     | N variants in test | p-value  | N variants in test | p-value  | N variants in test | p-value  | N variants in test | p-value  | N variants in test | p-value  | N variants in test | p-value  |
| ACADM        | 1   | 2                  | 3.49E-01 | 2                  | 3.49E-01 | 1                  | 5.22E-01 | 1                  | 5.22E-01 | 1                  | 5.93E-01 | 1                  | 5.93E-01 |
| ZNF121       | 19  | 1                  | 7.50E-01 | 1                  | 7.50E-01 | 1                  | 5.22E-01 | 1                  | 5.22E-01 |                    |          |                    |          |
| MAP3K7CL     | 21  | 1                  | 7.50E-01 | 1                  | 7.50E-01 | 1                  | 5.22E-01 | 1                  | 5.22E-01 |                    |          |                    |          |
| ST6GALNAC6   | 9   | 3                  | 1.27E-01 | 3                  | 1.27E-01 | 1                  | 5.22E-01 | 1                  | 5.22E-01 | 2                  | 6.35E-01 | 2                  | 6.35E-01 |
| CCDC70       | 13  | 1                  | 7.50E-01 | 1                  | 7.50E-01 | 1                  | 5.22E-01 | 1                  | 5.22E-01 |                    |          |                    |          |
| KRT222       | 17  | 1                  | 7.50E-01 | 1                  | 7.50E-01 | 1                  | 5.22E-01 | 1                  | 5.22E-01 |                    |          |                    |          |
| FAM170B      | 10  | 1                  | 7.59E-01 | 1                  | 7.59E-01 | 1                  | 5.22E-01 | 1                  | 5.22E-01 |                    |          |                    |          |
| DGCR14       | 22  | 2                  | 3.55E-01 | 2                  | 3.55E-01 | 1                  | 5.22E-01 | 1                  | 5.22E-01 | 1                  | 6.53E-01 | 1                  | 6.53E-01 |
| RERGL        | 12  | 1                  | 7.59E-01 | 1                  | 7.59E-01 | 1                  | 5.22E-01 | 1                  | 5.22E-01 |                    |          |                    |          |
| BECN1        | 17  | 1                  | 7.59E-01 | 1                  | 7.59E-01 | 1                  | 5.22E-01 | 1                  | 5.22E-01 |                    |          |                    |          |
| DLEU7        | 13  | 1                  | 7.59E-01 | 1                  | 7.59E-01 | 1                  | 5.22E-01 | 1                  | 5.22E-01 |                    |          |                    |          |
| RPL31        | 2   | 1                  | 7.59E-01 | 1                  | 7.59E-01 | 1                  | 5.22E-01 | 1                  | 5.22E-01 |                    |          |                    |          |
| RNF17        | 13  | 1                  | 7.39E-01 | 1                  | 7.39E-01 | 1                  | 5.22E-01 | 1                  | 5.22E-01 |                    |          |                    |          |
| PP2D1        | 3   | 2                  | 4.49E-01 | 2                  | 4.49E-01 | 1                  | 5.22E-01 | 1                  | 5.22E-01 | 1                  | 6.18E-01 | 1                  | 6.18E-01 |
| RNF112       | 17  | 1                  | 7.39E-01 | 1                  | 7.39E-01 | 1                  | 5.22E-01 | 1                  | 5.22E-01 |                    |          |                    |          |
| PLD6         | 17  | 1                  | 7.61E-01 | 1                  | 7.61E-01 | 1                  | 5.22E-01 | 1                  | 5.22E-01 |                    |          |                    |          |
| POM121L2     | 6   | 5                  | 1.00E+00 | 6                  | 1.00E+00 | 4                  | 5.24E-01 | 5                  | 5.23E-01 | 5                  | 7.66E-01 | 6                  | 7.63E-01 |
| MOAP1        | 14  | 3                  | 3.83E-01 | 3                  | 3.83E-01 | 2                  | 5.23E-01 | 2                  | 5.23E-01 | 3                  | 1.00E+00 | 3                  | 1.00E+00 |
| ABCA2        | 9   | 4                  | 5.12E-01 | 4                  | 5.12E-01 | 2                  | 6.90E-01 | 2                  | 6.90E-01 | 3                  | 5.23E-01 | 3                  | 5.23E-01 |
| INPP4A       | 2   | 1                  | 7.56E-01 | 1                  | 7.56E-01 | 1                  | 5.23E-01 | 1                  | 5.23E-01 |                    |          |                    |          |
| WSCD1        | 17  | 2                  | 3.96E-01 | 2                  | 3.96E-01 | 1                  | 5.23E-01 | 1                  | 5.23E-01 | 1                  | 6.63E-01 | 1                  | 6.63E-01 |
| TOR1AIP2     | 1   | 1                  | 7.56E-01 | 1                  | 7.56E-01 | 1                  | 5.23E-01 | 1                  | 5.23E-01 |                    |          |                    |          |
| C11orf42     | 11  | 2                  | 3.95E-01 | 2                  | 3.95E-01 | 1                  | 5.23E-01 | 1                  | 5.23E-01 | 1                  | 6.52E-01 | 1                  | 6.52E-01 |
| HOXC11       | 12  | 2                  | 3.30E-01 | 2                  | 3.30E-01 | 1                  | 5.23E-01 | 1                  | 5.23E-01 | 1                  | 6.68E-01 | 1                  | 6.68E-01 |
| DHRS7B       | 17  | 2                  | 4.08E-01 | 2                  | 4.08E-01 | 1                  | 5.23E-01 | 1                  | 5.23E-01 | 1                  | 6.09E-01 | 1                  | 6.09E-01 |
| PSMB4        | 1   | 1                  | 7.56E-01 | 1                  | 7.56E-01 | 1                  | 5.23E-01 | 1                  | 5.23E-01 |                    |          |                    |          |
| PCP4         | 21  | 1                  | 7.56E-01 | 1                  | 7.56E-01 | 1                  | 5.23E-01 | 1                  | 5.23E-01 |                    |          |                    |          |
| TMEM121      | 14  | 1                  | 7.56E-01 | 1                  | 7.56E-01 | 1                  | 5.23E-01 | 1                  | 5.23E-01 |                    |          |                    |          |
| ALOXE3       | 17  | 5                  | 1.68E-01 | 5                  | 1.68E-01 | 5                  | 5.23E-01 | 5                  | 5.23E-01 |                    |          |                    |          |
| TNFSF12      | 17  | 2                  | 3.93E-01 | 2                  | 3.93E-01 | 1                  | 5.23E-01 | 1                  | 5.23E-01 | 1                  | 5.92E-01 | 1                  | 5.92E-01 |
| KCNG2        | 18  | 1                  | 7.61E-01 | 1                  | 7.61E-01 | 1                  | 5.23E-01 | 1                  | 5.23E-01 |                    |          |                    |          |
| KCNC4        | 1   | 1                  | 7.61E-01 | 1                  | 7.61E-01 | 1                  | 5.23E-01 | 1                  | 5.23E-01 |                    |          |                    |          |
| NFS1         | 20  | 1                  | 7.61E-01 | 1                  | 7.61E-01 | 1                  | 5.23E-01 | 1                  | 5.23E-01 |                    |          |                    |          |
| CPNE1        | 20  | 2                  | 5.54E-01 | 3                  | 8.83E-01 | 1                  | 5.23E-01 | 2                  | 8.03E-01 | 1                  | 6.28E-01 | 2                  | 7.98E-01 |
| MIF4GD       | 17  | 1                  | 7.61E-01 | 1                  | 7.61E-01 | 1                  | 5.23E-01 | 1                  | 5.23E-01 |                    |          |                    |          |
| TNFSF12-TNFS | 17  | 2                  | 3.93E-01 | 2                  | 3.93E-01 | 1                  | 5.23E-01 | 1                  | 5.23E-01 | 1                  | 5.92E-01 | 1                  | 5.92E-01 |
| SERPINB1     | 6   | 1                  | 7.61E-01 | 1                  | 7.61E-01 | 1                  | 5.23E-01 | 1                  | 5.23E-01 |                    |          |                    |          |
| TERF2IP      | 16  | 1                  | 7.06E-01 | 1                  | 7.06E-01 | 1                  | 5.23E-01 | 1                  | 5.23E-01 | 1                  | 6.68E-01 | 1                  | 6.68E-01 |
| UBAP2L       | 1   | 2                  | 1.96E-01 | 2                  | 1.96E-01 | 2                  | 5.23E-01 | 2                  | 5.23E-01 |                    |          |                    |          |
| PVRL4        | 1   | 4                  | 2.76E-01 | 4                  | 2.76E-01 | 2                  | 6.34E-01 | 2                  | 6.34E-01 | 3                  | 5.23E-01 | 3                  | 5.23E-01 |
| LIPC         | 15  | 4                  | 1.00E+00 | 4                  | 1.00E+00 | 3                  | 5.31E-01 | 3                  | 5.31E-01 | 3                  | 5.24E-01 | 3                  | 5.24E-01 |
| MURC         | 9   | 3                  | 5.57E-03 | 3                  | 5.57E-03 |                    |          |                    |          | 3                  | 5.24E-01 | 3                  | 5.24E-01 |
| STX1B        | 16  | 1                  | 7.55E-01 | 1                  | 7.55E-01 | 1                  | 5.24E-01 | 1                  | 5.24E-01 |                    |          |                    |          |
| FBLN2        | 3   | 6                  | 1.00E+00 | 6                  | 1.00E+00 | 5                  | 5.24E-01 | 5                  | 5.24E-01 | 2                  | 6.50E-01 | 2                  | 6.50E-01 |
| NR3C1        | 5   | 2                  | 3.76E-01 | 2                  | 3.76E-01 | 1                  | 5.24E-01 | 1                  | 5.24E-01 | 1                  | 6.06E-01 | 1                  | 6.06E-01 |
| CD200        | 3   | 1                  | 7.50E-01 | 1                  | 7.50E-01 | 1                  | 5.24E-01 | 1                  | 5.24E-01 |                    |          |                    |          |
| NELFCD       | 20  | 1                  | 7.50E-01 | 1                  | 7.50E-01 | 1                  | 5.24E-01 | 1                  | 5.24E-01 |                    |          |                    |          |
| MUCL1        | 12  | 1                  | 7.50E-01 | 1                  | 7.50E-01 | 1                  | 5.24E-01 | 1                  | 5.24E-01 |                    |          |                    |          |

| SetID    | Chr | ADEH- vs NA        |          |                    |          | ADEH+ vs ADEH-     |          |                    |          | ADEH+ vs NA        |          |                    |          |
|----------|-----|--------------------|----------|--------------------|----------|--------------------|----------|--------------------|----------|--------------------|----------|--------------------|----------|
|          |     | rarenovel          |          | all                |          | rarenovel          |          | all                |          | rarenovel          |          | all                |          |
|          |     | N variants in test | p-value  | N variants in test | p-value  | N variants in test | p-value  | N variants in test | p-value  | N variants in test | p-value  | N variants in test | p-value  |
| FOSL2    | 2   | 1                  | 7.50E-01 | 1                  | 7.50E-01 | 1                  | 5.24E-01 | 1                  | 5.24E-01 |                    |          |                    |          |
| RUFY4    | 2   | 1                  | 1.56E-01 | 1                  | 1.56E-01 | 1                  | 5.24E-01 | 1                  | 5.24E-01 |                    |          |                    |          |
| ABCC6    | 16  | 13                 | 6.15E-01 | 13                 | 6.15E-01 | 8                  | 8.77E-01 | 8                  | 8.77E-01 | 8                  | 5.24E-01 | 8                  | 5.24E-01 |
| MFS12    | 19  | 5                  | 7.90E-01 | 5                  | 7.90E-01 | 3                  | 5.29E-01 | 3                  | 5.29E-01 | 4                  | 5.24E-01 | 4                  | 5.24E-01 |
| NCR3LG1  | 11  | 1                  | 2.40E-01 | 1                  | 2.40E-01 | 1                  | 5.24E-01 | 1                  | 5.24E-01 |                    |          |                    |          |
| ZNF20    | 19  | 4                  | 1.24E-01 | 4                  | 1.24E-01 | 4                  | 1.00E+00 | 4                  | 1.00E+00 | 2                  | 5.24E-01 | 2                  | 5.24E-01 |
| CCHCR1   | 6   | 9                  | 8.30E-01 | 13                 | 3.99E-01 | 8                  | 5.56E-01 | 12                 | 7.42E-01 | 5                  | 5.24E-01 | 9                  | 5.92E-01 |
| MMP17    | 12  | 1                  | 7.49E-01 | 1                  | 7.49E-01 | 1                  | 5.24E-01 | 1                  | 5.24E-01 |                    |          |                    |          |
| KXD1     | 19  | 1                  | 7.49E-01 | 1                  | 7.49E-01 | 1                  | 5.24E-01 | 1                  | 5.24E-01 |                    |          |                    |          |
| SERPINC1 | 1   | 2                  | 2.19E-01 | 2                  | 2.19E-01 | 1                  | 5.24E-01 | 1                  | 5.24E-01 | 2                  | 6.36E-01 | 2                  | 6.36E-01 |
| ST20     | 15  | 1                  | 7.50E-01 | 1                  | 7.50E-01 | 1                  | 5.24E-01 | 1                  | 5.24E-01 |                    |          |                    |          |
| CERK     | 22  | 2                  | 5.13E-01 | 2                  | 5.13E-01 | 1                  | 5.24E-01 | 1                  | 5.24E-01 | 1                  | 5.77E-01 | 1                  | 5.77E-01 |
| C2CD4A   | 15  | 2                  | 4.83E-01 | 2                  | 4.83E-01 | 1                  | 5.24E-01 | 1                  | 5.24E-01 | 1                  | 6.31E-01 | 1                  | 6.31E-01 |
| DDAH2    | 6   | 1                  | 7.14E-01 | 1                  | 7.14E-01 | 1                  | 5.24E-01 | 1                  | 5.24E-01 | 1                  | 6.63E-01 | 1                  | 6.63E-01 |
| DLX3     | 17  | 1                  | 7.49E-01 | 1                  | 7.49E-01 | 1                  | 5.24E-01 | 1                  | 5.24E-01 |                    |          |                    |          |
| PCBP3    | 21  | 1                  | 7.49E-01 | 1                  | 7.49E-01 | 1                  | 5.24E-01 | 1                  | 5.24E-01 |                    |          |                    |          |
| MTMR6    | 13  | 1                  | 7.64E-01 | 1                  | 7.64E-01 | 1                  | 5.24E-01 | 1                  | 5.24E-01 |                    |          |                    |          |
| PDE4A    | 19  | 2                  | 5.38E-01 | 2                  | 5.38E-01 | 1                  | 5.24E-01 | 1                  | 5.24E-01 | 1                  | 5.67E-01 | 1                  | 5.67E-01 |
| PRDM1    | 6   | 1                  | 7.64E-01 | 1                  | 7.64E-01 | 1                  | 5.24E-01 | 1                  | 5.24E-01 |                    |          |                    |          |
| C3orf38  | 3   | 3                  | 1.13E-01 | 3                  | 1.13E-01 | 1                  | 5.24E-01 | 1                  | 5.24E-01 | 2                  | 6.29E-01 | 2                  | 6.29E-01 |
| GNG13    | 16  | 1                  | 7.64E-01 | 1                  | 7.64E-01 | 1                  | 5.24E-01 | 1                  | 5.24E-01 |                    |          |                    |          |
| REEP2    | 5   | 1                  | 7.64E-01 | 1                  | 7.64E-01 | 1                  | 5.24E-01 | 1                  | 5.24E-01 |                    |          |                    |          |
| SEMA3A   | 7   | 3                  | 7.09E-01 | 3                  | 7.09E-01 | 3                  | 5.24E-01 | 3                  | 5.24E-01 | 1                  | 6.41E-01 | 1                  | 6.41E-01 |
| ITPR3    | 6   | 5                  | 6.19E-01 | 5                  | 6.19E-01 | 4                  | 5.25E-01 | 4                  | 5.25E-01 | 1                  | 6.35E-01 | 1                  | 6.35E-01 |
| IQSEC3   | 12  | 2                  | 2.83E-01 | 2                  | 2.83E-01 | 1                  | 5.25E-01 | 1                  | 5.25E-01 | 1                  | 6.20E-01 | 1                  | 6.20E-01 |
| RBFOX1   | 16  | 2                  | 4.93E-01 | 2                  | 4.93E-01 | 1                  | 5.25E-01 | 1                  | 5.25E-01 | 1                  | 6.24E-01 | 1                  | 6.24E-01 |
| ALDH3A1  | 17  | 2                  | 3.87E-01 | 2                  | 3.87E-01 | 1                  | 5.25E-01 | 1                  | 5.25E-01 | 1                  | 6.41E-01 | 1                  | 6.41E-01 |
| PISD     | 22  | 1                  | 7.58E-01 | 1                  | 7.58E-01 | 1                  | 5.25E-01 | 1                  | 5.25E-01 |                    |          |                    |          |
| CCSAP    | 1   | 1                  | 7.58E-01 | 1                  | 7.58E-01 | 1                  | 5.25E-01 | 1                  | 5.25E-01 |                    |          |                    |          |
| AHSP     | 16  | 1                  | 7.01E-01 | 1                  | 7.01E-01 | 1                  | 5.25E-01 | 1                  | 5.25E-01 | 1                  | 6.50E-01 | 1                  | 6.50E-01 |
| ACOT7    | 1   | 1                  | 7.58E-01 | 1                  | 7.58E-01 | 1                  | 5.25E-01 | 1                  | 5.25E-01 |                    |          |                    |          |
| CD8A     | 2   | 2                  | 3.98E-01 | 2                  | 3.98E-01 | 1                  | 5.25E-01 | 1                  | 5.25E-01 | 1                  | 5.92E-01 | 1                  | 5.92E-01 |
| FUT8     | 14  | 1                  | 7.58E-01 | 1                  | 7.58E-01 | 1                  | 5.25E-01 | 1                  | 5.25E-01 |                    |          |                    |          |
| CA4      | 17  | 1                  | 7.58E-01 | 1                  | 7.58E-01 | 1                  | 5.25E-01 | 1                  | 5.25E-01 |                    |          |                    |          |
| MYF6     | 12  | 1                  | 7.58E-01 | 1                  | 7.58E-01 | 1                  | 5.25E-01 | 1                  | 5.25E-01 |                    |          |                    |          |
| COLGALT1 | 19  | 1                  | 7.58E-01 | 1                  | 7.58E-01 | 1                  | 5.25E-01 | 1                  | 5.25E-01 |                    |          |                    |          |
| FAM63B   | 15  | 1                  | 7.58E-01 | 1                  | 7.58E-01 | 1                  | 5.25E-01 | 1                  | 5.25E-01 |                    |          |                    |          |
| ARL16    | 17  | 1                  | 7.58E-01 | 1                  | 7.58E-01 | 1                  | 5.25E-01 | 1                  | 5.25E-01 |                    |          |                    |          |
| PEG10    | 7   | 1                  | 7.58E-01 | 1                  | 7.58E-01 | 1                  | 5.25E-01 | 1                  | 5.25E-01 |                    |          |                    |          |
| THG1L    | 5   | 1                  | 7.58E-01 | 1                  | 7.58E-01 | 1                  | 5.25E-01 | 1                  | 5.25E-01 |                    |          |                    |          |
| ZNF512   | 2   | 1                  | 7.58E-01 | 1                  | 7.58E-01 | 1                  | 5.25E-01 | 1                  | 5.25E-01 |                    |          |                    |          |
| PLEKHD1  | 14  | 4                  | 3.62E-01 | 4                  | 3.62E-01 | 3                  | 5.25E-01 | 3                  | 5.25E-01 | 1                  | 6.34E-01 | 1                  | 6.34E-01 |
| LRP5     | 11  | 6                  | 3.29E-01 | 6                  | 3.29E-01 | 3                  | 6.55E-01 | 3                  | 6.55E-01 | 3                  | 5.25E-01 | 3                  | 5.25E-01 |
| PARP2    | 14  | 5                  | 1.64E-01 | 5                  | 1.64E-01 | 5                  | 5.25E-01 | 5                  | 5.25E-01 |                    |          |                    |          |
| GTPBP8   | 3   | 2                  | 2.04E-01 | 2                  | 2.04E-01 | 2                  | 5.25E-01 | 2                  | 5.25E-01 |                    |          |                    |          |
| SPHK1    | 17  | 1                  | 7.46E-01 | 1                  | 7.46E-01 | 1                  | 5.25E-01 | 1                  | 5.25E-01 |                    |          |                    |          |
| MMRN2    | 10  | 3                  | 1.83E-01 | 3                  | 1.83E-01 | 1                  | 5.25E-01 | 1                  | 5.25E-01 | 2                  | 6.53E-01 | 2                  | 6.53E-01 |
| HIC1     | 17  | 2                  | 5.02E-01 | 2                  | 5.02E-01 | 1                  | 5.25E-01 | 1                  | 5.25E-01 | 1                  | 6.35E-01 | 1                  | 6.35E-01 |

| SetID      | Chr | ADEH- vs NA        |          |                    |          | ADEH+ vs ADEH-     |          |                    |          | ADEH+ vs NA        |          |                    |          |
|------------|-----|--------------------|----------|--------------------|----------|--------------------|----------|--------------------|----------|--------------------|----------|--------------------|----------|
|            |     | rarenovel          |          | all                |          | rarenovel          |          | all                |          | rarenovel          |          | all                |          |
|            |     | N variants in test | p-value  | N variants in test | p-value  | N variants in test | p-value  | N variants in test | p-value  | N variants in test | p-value  | N variants in test | p-value  |
| SUSD5      | 3   | 1                  | 7.46E-01 | 1                  | 7.46E-01 | 1                  | 5.25E-01 | 1                  | 5.25E-01 |                    |          |                    |          |
| ZNF879     | 5   | 1                  | 7.46E-01 | 1                  | 7.46E-01 | 1                  | 5.25E-01 | 1                  | 5.25E-01 |                    |          |                    |          |
| SFXN4      | 10  | 1                  | 7.46E-01 | 1                  | 7.46E-01 | 1                  | 5.25E-01 | 1                  | 5.25E-01 |                    |          |                    |          |
| OR6C1      | 12  |                    |          | 1                  | 5.16E-02 |                    |          | 1                  | 1.00E+00 |                    |          | 1                  | 5.25E-01 |
| ZNF503     | 10  | 3                  | 4.93E-01 | 3                  | 4.93E-01 | 1                  | 1.00E+00 | 1                  | 1.00E+00 | 3                  | 5.25E-01 | 3                  | 5.25E-01 |
| BIRC5      | 17  | 1                  | 7.57E-01 | 1                  | 7.57E-01 | 1                  | 5.25E-01 | 1                  | 5.25E-01 |                    |          |                    |          |
| ALOX5      | 10  | 1                  | 7.57E-01 | 1                  | 7.57E-01 | 1                  | 5.25E-01 | 1                  | 5.25E-01 |                    |          |                    |          |
| GINS4      | 8   | 1                  | 7.57E-01 | 1                  | 7.57E-01 | 1                  | 5.25E-01 | 1                  | 5.25E-01 |                    |          |                    |          |
| KY         | 3   | 1                  | 7.57E-01 | 1                  | 7.57E-01 | 1                  | 5.26E-01 | 1                  | 5.26E-01 |                    |          |                    |          |
| CRY1       | 12  | 3                  | 1.97E-01 | 3                  | 1.97E-01 | 1                  | 5.26E-01 | 1                  | 5.26E-01 | 2                  | 6.32E-01 | 2                  | 6.32E-01 |
| LIMK1      | 7   | 1                  | 7.57E-01 | 1                  | 7.57E-01 | 1                  | 5.26E-01 | 1                  | 5.26E-01 |                    |          |                    |          |
| ZBTB16     | 11  | 1                  | 7.57E-01 | 1                  | 7.57E-01 | 1                  | 5.26E-01 | 1                  | 5.26E-01 |                    |          |                    |          |
| VWA5B1     | 1   | 10                 | 2.20E-01 | 11                 | 2.20E-01 | 8                  | 5.26E-01 | 9                  | 5.26E-01 | 5                  | 6.67E-01 | 6                  | 6.67E-01 |
| SLAIN1     | 13  | 1                  | 7.43E-01 | 1                  | 7.43E-01 | 1                  | 5.26E-01 | 1                  | 5.26E-01 |                    |          |                    |          |
| SARS2      | 19  | 1                  | 7.43E-01 | 1                  | 7.43E-01 | 1                  | 5.26E-01 | 1                  | 5.26E-01 |                    |          |                    |          |
| SLC14A1    | 18  | 2                  | 4.59E-01 | 3                  | 4.59E-01 | 1                  | 5.26E-01 | 2                  | 5.26E-01 | 1                  | 6.00E-01 | 2                  | 6.00E-01 |
| SF3B2      | 11  | 3                  | 1.58E-01 | 3                  | 1.58E-01 | 1                  | 5.26E-01 | 1                  | 5.26E-01 | 2                  | 6.47E-01 | 2                  | 6.47E-01 |
| ZBTB18     | 1   | 1                  | 7.43E-01 | 1                  | 7.43E-01 | 1                  | 5.26E-01 | 1                  | 5.26E-01 |                    |          |                    |          |
| DPEP1      | 16  | 2                  | 4.82E-01 | 2                  | 4.82E-01 | 1                  | 5.26E-01 | 1                  | 5.26E-01 | 1                  | 5.98E-01 | 1                  | 5.98E-01 |
| ZAR1L      | 13  | 1                  | 7.43E-01 | 1                  | 7.43E-01 | 1                  | 5.26E-01 | 1                  | 5.26E-01 |                    |          |                    |          |
| VWA3A      | 16  | 5                  | 8.03E-01 | 5                  | 8.03E-01 | 4                  | 5.26E-01 | 4                  | 5.26E-01 | 2                  | 6.44E-01 | 2                  | 6.44E-01 |
| LY75       | 2   | 12                 | 2.00E-01 | 12                 | 2.00E-01 | 9                  | 5.26E-01 | 9                  | 5.26E-01 | 10                 | 7.50E-01 | 10                 | 7.50E-01 |
| LY75-CD302 | 2   | 12                 | 2.00E-01 | 12                 | 2.00E-01 | 9                  | 5.26E-01 | 9                  | 5.26E-01 | 10                 | 7.50E-01 | 10                 | 7.50E-01 |
| LAT2       | 7   | 1                  | 7.52E-01 | 1                  | 7.52E-01 | 1                  | 5.26E-01 | 1                  | 5.26E-01 |                    |          |                    |          |
| EARS2      | 16  | 2                  | 3.65E-01 | 2                  | 3.65E-01 | 1                  | 5.26E-01 | 1                  | 5.26E-01 | 1                  | 6.34E-01 | 1                  | 6.34E-01 |
| CCDC51     | 3   | 1                  | 7.52E-01 | 1                  | 7.52E-01 | 1                  | 5.26E-01 | 1                  | 5.26E-01 |                    |          |                    |          |
| FAM69B     | 9   | 2                  | 2.88E-01 | 2                  | 2.88E-01 | 1                  | 5.26E-01 | 1                  | 5.26E-01 | 1                  | 6.16E-01 | 1                  | 6.16E-01 |
| UFSP1      | 7   | 1                  | 7.52E-01 | 1                  | 7.52E-01 | 1                  | 5.26E-01 | 1                  | 5.26E-01 |                    |          |                    |          |
| SCRN3      | 2   | 2                  | 3.92E-01 | 2                  | 3.92E-01 | 1                  | 5.26E-01 | 1                  | 5.26E-01 | 1                  | 6.27E-01 | 1                  | 6.27E-01 |
| LIN52      | 14  | 1                  | 7.52E-01 | 1                  | 7.52E-01 | 1                  | 5.26E-01 | 1                  | 5.26E-01 |                    |          |                    |          |
| IGSF8      | 1   | 1                  | 7.52E-01 | 1                  | 7.52E-01 | 1                  | 5.26E-01 | 1                  | 5.26E-01 |                    |          |                    |          |
| TSPAN5     | 4   | 1                  | 7.52E-01 | 1                  | 7.52E-01 | 1                  | 5.26E-01 | 1                  | 5.26E-01 |                    |          |                    |          |
| NCAM1      | 11  | 1                  | 4.03E-01 | 1                  | 4.03E-01 | 1                  | 5.26E-01 | 1                  | 5.26E-01 |                    |          |                    |          |
| IQGAP1     | 15  | 6                  | 6.28E-01 | 6                  | 6.28E-01 | 5                  | 5.27E-01 | 5                  | 5.27E-01 | 1                  | 6.10E-01 | 1                  | 6.10E-01 |
| SLC4A11    | 20  | 4                  | 5.75E-01 | 4                  | 5.75E-01 | 3                  | 5.27E-01 | 3                  | 5.27E-01 | 1                  | 5.80E-01 | 1                  | 5.80E-01 |
| NCR3       | 6   | 2                  | 7.31E-01 | 2                  | 7.31E-01 | 2                  | 5.27E-01 | 2                  | 5.27E-01 | 1                  | 6.63E-01 | 1                  | 6.63E-01 |
| RETSAT     | 2   | 1                  | 7.54E-01 | 1                  | 7.54E-01 | 1                  | 5.27E-01 | 1                  | 5.27E-01 |                    |          |                    |          |
| LGI2       | 4   | 2                  | 2.65E-01 | 2                  | 2.65E-01 | 1                  | 5.27E-01 | 1                  | 5.27E-01 | 2                  | 6.43E-01 | 2                  | 6.43E-01 |
| PURG       | 8   | 2                  | 3.92E-01 | 2                  | 3.92E-01 | 1                  | 5.27E-01 | 1                  | 5.27E-01 | 1                  | 6.18E-01 | 1                  | 6.18E-01 |
| OR10S1     | 11  | 1                  | 7.54E-01 | 1                  | 7.54E-01 | 1                  | 5.27E-01 | 1                  | 5.27E-01 |                    |          |                    |          |
| FASTKD5    | 20  | 1                  | 7.36E-01 | 1                  | 7.36E-01 | 1                  | 5.27E-01 | 1                  | 5.27E-01 | 1                  | 6.55E-01 | 1                  | 6.55E-01 |
| FSTL3      | 19  | 1                  | 7.54E-01 | 1                  | 7.54E-01 | 1                  | 5.27E-01 | 1                  | 5.27E-01 |                    |          |                    |          |
| GFI1B      | 9   | 2                  | 3.44E-01 | 2                  | 3.44E-01 | 1                  | 5.27E-01 | 1                  | 5.27E-01 | 1                  | 6.04E-01 | 1                  | 6.04E-01 |
| CATSPER3   | 5   | 1                  | 7.54E-01 | 1                  | 7.54E-01 | 1                  | 5.27E-01 | 1                  | 5.27E-01 |                    |          |                    |          |
| YEATS4     | 12  | 1                  | 7.54E-01 | 1                  | 7.54E-01 | 1                  | 5.27E-01 | 1                  | 5.27E-01 |                    |          |                    |          |
| PGPEP1     | 19  | 1                  | 7.46E-01 | 1                  | 7.46E-01 | 1                  | 5.27E-01 | 1                  | 5.27E-01 |                    |          |                    |          |
| SFTPC      | 8   | 1                  | 7.46E-01 | 1                  | 7.46E-01 | 1                  | 5.27E-01 | 1                  | 5.27E-01 |                    |          |                    |          |
| TAF4       | 20  | 1                  | 6.95E-01 | 1                  | 6.95E-01 | 1                  | 5.27E-01 | 1                  | 5.27E-01 | 1                  | 6.01E-01 | 1                  | 6.01E-01 |

| SetID    | Chr | ADEH- vs NA        |          |                    |          | ADEH+ vs ADEH-     |          |                    |          | ADEH+ vs NA        |          |                    |          |
|----------|-----|--------------------|----------|--------------------|----------|--------------------|----------|--------------------|----------|--------------------|----------|--------------------|----------|
|          |     | rarenovel          |          | all                |          | rarenovel          |          | all                |          | rarenovel          |          | all                |          |
|          |     | N variants in test | p-value  | N variants in test | p-value  | N variants in test | p-value  | N variants in test | p-value  | N variants in test | p-value  | N variants in test | p-value  |
| PMS1     | 2   | 5                  | 4.80E-01 | 5                  | 4.80E-01 | 3                  | 7.06E-01 | 3                  | 7.06E-01 | 3                  | 5.27E-01 | 3                  | 5.27E-01 |
| OTOA     | 16  | 2                  | 3.47E-01 | 2                  | 3.47E-01 | 1                  | 5.27E-01 | 1                  | 5.27E-01 | 1                  | 7.02E-01 | 1                  | 7.02E-01 |
| ASIC1    | 12  | 1                  | 7.53E-01 | 1                  | 7.53E-01 | 1                  | 5.27E-01 | 1                  | 5.27E-01 |                    |          |                    |          |
| GRIN2A   | 16  | 2                  | 3.67E-01 | 2                  | 3.67E-01 | 1                  | 5.27E-01 | 1                  | 5.27E-01 | 1                  | 6.06E-01 | 1                  | 6.06E-01 |
| ZNF790   | 19  | 1                  | 7.53E-01 | 1                  | 7.53E-01 | 1                  | 5.27E-01 | 1                  | 5.27E-01 |                    |          |                    |          |
| HOXC10   | 12  | 1                  | 6.50E-01 | 1                  | 6.50E-01 | 1                  | 5.27E-01 | 1                  | 5.27E-01 | 1                  | 6.32E-01 | 1                  | 6.32E-01 |
| CD68     | 17  | 1                  | 7.53E-01 | 1                  | 7.53E-01 | 1                  | 5.27E-01 | 1                  | 5.27E-01 |                    |          |                    |          |
| C9orf135 | 9   | 1                  | 7.53E-01 | 1                  | 7.53E-01 | 1                  | 5.27E-01 | 1                  | 5.27E-01 |                    |          |                    |          |
| TOM1L2   | 17  | 2                  | 4.05E-01 | 2                  | 4.05E-01 | 1                  | 5.27E-01 | 1                  | 5.27E-01 | 1                  | 6.33E-01 | 1                  | 6.33E-01 |
| ASRGL1   | 11  | 2                  | 4.16E-01 | 2                  | 4.16E-01 | 1                  | 5.27E-01 | 1                  | 5.27E-01 | 1                  | 6.36E-01 | 1                  | 6.36E-01 |
| CLN3     | 16  | 1                  | 7.61E-01 | 1                  | 7.61E-01 | 1                  | 5.27E-01 | 1                  | 5.27E-01 |                    |          |                    |          |
| DNAAF2   | 14  | 2                  | 4.35E-01 | 2                  | 4.35E-01 | 1                  | 5.27E-01 | 1                  | 5.27E-01 | 1                  | 6.22E-01 | 1                  | 6.22E-01 |
| FANCE    | 6   | 1                  | 7.61E-01 | 1                  | 7.61E-01 | 1                  | 5.27E-01 | 1                  | 5.27E-01 |                    |          |                    |          |
| UBN1     | 16  | 4                  | 6.30E-02 | 4                  | 6.30E-02 | 1                  | 5.27E-01 | 1                  | 5.27E-01 | 3                  | 5.30E-01 | 3                  | 5.30E-01 |
| EAF1     | 3   | 1                  | 7.56E-01 | 1                  | 7.56E-01 | 1                  | 5.27E-01 | 1                  | 5.27E-01 |                    |          |                    |          |
| SUPT7L   | 2   | 2                  | 4.10E-01 | 2                  | 4.10E-01 | 1                  | 5.27E-01 | 1                  | 5.27E-01 | 1                  | 6.34E-01 | 1                  | 6.34E-01 |
| NOV      | 8   | 1                  | 7.56E-01 | 1                  | 7.56E-01 | 1                  | 5.27E-01 | 1                  | 5.27E-01 |                    |          |                    |          |
| LMBR1    | 7   | 1                  | 7.56E-01 | 1                  | 7.56E-01 | 1                  | 5.27E-01 | 1                  | 5.27E-01 |                    |          |                    |          |
| PTGES    | 9   | 1                  | 7.56E-01 | 1                  | 7.56E-01 | 1                  | 5.27E-01 | 1                  | 5.27E-01 |                    |          |                    |          |
| SSR1     | 6   | 2                  | 3.93E-01 | 2                  | 3.93E-01 | 1                  | 5.27E-01 | 1                  | 5.27E-01 | 1                  | 6.19E-01 | 1                  | 6.19E-01 |
| TMIE     | 3   | 1                  | 7.52E-01 | 1                  | 7.52E-01 | 1                  | 5.27E-01 | 1                  | 5.27E-01 |                    |          |                    |          |
| ABLIM2   | 4   | 3                  | 2.19E-01 | 3                  | 2.19E-01 | 1                  | 5.27E-01 | 1                  | 5.27E-01 | 2                  | 6.23E-01 | 2                  | 6.23E-01 |
| COLQ     | 3   | 2                  | 4.93E-01 | 2                  | 4.93E-01 | 1                  | 5.27E-01 | 1                  | 5.27E-01 | 1                  | 6.53E-01 | 1                  | 6.53E-01 |
| KLK1     | 19  | 1                  | 7.52E-01 | 1                  | 7.52E-01 | 1                  | 5.27E-01 | 1                  | 5.27E-01 |                    |          |                    |          |
| AIP      | 11  | 1                  | 7.02E-01 | 1                  | 7.02E-01 | 1                  | 5.27E-01 | 1                  | 5.27E-01 | 1                  | 6.77E-01 | 1                  | 6.77E-01 |
| MED21    | 12  | 1                  | 7.61E-01 | 1                  | 7.61E-01 | 1                  | 5.27E-01 | 1                  | 5.27E-01 |                    |          |                    |          |
| ENTPD7   | 10  | 1                  | 7.59E-01 | 1                  | 7.59E-01 | 1                  | 5.28E-01 | 1                  | 5.28E-01 |                    |          |                    |          |
| MIS18A   | 21  | 2                  | 3.02E-01 | 2                  | 3.02E-01 | 1                  | 5.28E-01 | 1                  | 5.28E-01 | 1                  | 6.89E-01 | 1                  | 6.89E-01 |
| EMP2     | 16  | 1                  | 7.59E-01 | 1                  | 7.59E-01 | 1                  | 5.28E-01 | 1                  | 5.28E-01 |                    |          |                    |          |
| GPAM     | 10  | 2                  | 5.54E-01 | 2                  | 5.54E-01 | 1                  | 5.28E-01 | 1                  | 5.28E-01 | 1                  | 5.67E-01 | 1                  | 5.67E-01 |
| ZP4      | 1   | 2                  | 4.56E-01 | 2                  | 4.56E-01 | 1                  | 5.28E-01 | 1                  | 5.28E-01 | 1                  | 6.03E-01 | 1                  | 6.03E-01 |
| PARP4    | 13  | 2                  | 4.73E-01 | 2                  | 4.73E-01 | 1                  | 5.28E-01 | 1                  | 5.28E-01 | 1                  | 5.77E-01 | 1                  | 5.77E-01 |
| POU4F3   | 5   | 3                  | 1.58E-01 | 3                  | 1.58E-01 | 1                  | 5.28E-01 | 1                  | 5.28E-01 | 2                  | 6.39E-01 | 2                  | 6.39E-01 |
| C17orf75 | 17  | 1                  | 7.59E-01 | 1                  | 7.59E-01 | 1                  | 5.28E-01 | 1                  | 5.28E-01 |                    |          |                    |          |
| ZFP62    | 5   | 1                  | 7.59E-01 | 1                  | 7.59E-01 | 1                  | 5.28E-01 | 1                  | 5.28E-01 |                    |          |                    |          |
| ATG9A    | 2   | 1                  | 7.59E-01 | 1                  | 7.59E-01 | 1                  | 5.28E-01 | 1                  | 5.28E-01 |                    |          |                    |          |
| MRPS35   | 12  | 1                  | 7.59E-01 | 1                  | 7.59E-01 | 1                  | 5.28E-01 | 1                  | 5.28E-01 |                    |          |                    |          |
| NME4     | 16  | 1                  | 7.25E-01 | 1                  | 7.25E-01 | 1                  | 5.28E-01 | 1                  | 5.28E-01 | 1                  | 6.64E-01 | 1                  | 6.64E-01 |
| PLK2     | 5   | 1                  | 7.59E-01 | 1                  | 7.59E-01 | 1                  | 5.28E-01 | 1                  | 5.28E-01 |                    |          |                    |          |
| ZMYM1    | 1   | 1                  | 7.59E-01 | 1                  | 7.59E-01 | 1                  | 5.28E-01 | 1                  | 5.28E-01 |                    |          |                    |          |
| DDX27    | 20  | 3                  | 1.22E-01 | 3                  | 1.22E-01 | 1                  | 5.28E-01 | 1                  | 5.28E-01 | 2                  | 6.45E-01 | 2                  | 6.45E-01 |
| SGMS2    | 4   | 1                  | 7.54E-01 | 1                  | 7.54E-01 | 1                  | 5.28E-01 | 1                  | 5.28E-01 |                    |          |                    |          |
| C16orf59 | 16  | 2                  | 4.24E-01 | 2                  | 4.24E-01 | 1                  | 5.28E-01 | 1                  | 5.28E-01 | 1                  | 6.71E-01 | 1                  | 6.71E-01 |
| FRA10AC1 | 10  | 1                  | 7.54E-01 | 1                  | 7.54E-01 | 1                  | 5.28E-01 | 1                  | 5.28E-01 |                    |          |                    |          |
| ATP13A3  | 3   | 1                  | 7.65E-01 | 1                  | 7.65E-01 | 1                  | 5.28E-01 | 1                  | 5.28E-01 |                    |          |                    |          |
| SIX2     | 2   | 1                  | 7.65E-01 | 1                  | 7.65E-01 | 1                  | 5.28E-01 | 1                  | 5.28E-01 |                    |          |                    |          |
| PJA2     | 5   | 1                  | 7.65E-01 | 1                  | 7.65E-01 | 1                  | 5.28E-01 | 1                  | 5.28E-01 |                    |          |                    |          |
| SLC38A1  | 12  | 1                  | 7.65E-01 | 1                  | 7.65E-01 | 1                  | 5.28E-01 | 1                  | 5.28E-01 |                    |          |                    |          |

| SetID     | Chr | ADEH- vs NA        |          |                    |          | ADEH+ vs ADEH-     |          |                    |          | ADEH+ vs NA        |          |                    |          |
|-----------|-----|--------------------|----------|--------------------|----------|--------------------|----------|--------------------|----------|--------------------|----------|--------------------|----------|
|           |     | rarenovel          |          | all                |          | rarenovel          |          | all                |          | rarenovel          |          | all                |          |
|           |     | N variants in test | p-value  | N variants in test | p-value  | N variants in test | p-value  | N variants in test | p-value  | N variants in test | p-value  | N variants in test | p-value  |
| USP36     | 17  | 2                  | 4.01E-01 | 2                  | 4.01E-01 | 1                  | 5.28E-01 | 1                  | 5.28E-01 | 1                  | 5.33E-01 | 1                  | 5.33E-01 |
| SLC48A1   | 12  | 1                  | 7.65E-01 | 1                  | 7.65E-01 | 1                  | 5.28E-01 | 1                  | 5.28E-01 |                    |          |                    |          |
| SAR1B     | 5   | 2                  | 3.75E-01 | 2                  | 3.75E-01 | 1                  | 5.28E-01 | 1                  | 5.28E-01 | 1                  | 6.71E-01 | 1                  | 6.71E-01 |
| RAC2      | 22  | 1                  | 7.65E-01 | 1                  | 7.65E-01 | 1                  | 5.28E-01 | 1                  | 5.28E-01 |                    |          |                    |          |
| NUDT7     | 16  | 5                  | 6.95E-01 | 6                  | 8.72E-01 | 4                  | 8.49E-01 | 5                  | 9.06E-01 | 1                  | 5.28E-01 | 2                  | 7.24E-01 |
| SGIP1     | 1   | 1                  | 2.38E-01 | 1                  | 2.38E-01 |                    |          |                    |          | 1                  | 5.28E-01 | 1                  | 5.28E-01 |
| ST8SIA1   | 12  | 1                  | 2.38E-01 | 1                  | 2.38E-01 |                    |          |                    |          | 1                  | 5.28E-01 | 1                  | 5.28E-01 |
| PGAP2     | 11  | 1                  | 2.38E-01 | 1                  | 2.38E-01 |                    |          |                    |          | 1                  | 5.28E-01 | 1                  | 5.28E-01 |
| CALHM1    | 10  | 3                  | 8.39E-01 | 3                  | 8.39E-01 | 3                  | 6.35E-01 | 3                  | 6.35E-01 | 1                  | 5.28E-01 | 1                  | 5.28E-01 |
| TDRD7     | 9   | 5                  | 6.86E-01 | 5                  | 6.86E-01 | 4                  | 5.83E-01 | 4                  | 5.83E-01 | 1                  | 5.28E-01 | 1                  | 5.28E-01 |
| DPT       | 1   | 2                  | 1.00E+00 | 2                  | 1.00E+00 | 2                  | 6.12E-01 | 2                  | 6.12E-01 | 1                  | 5.28E-01 | 1                  | 5.28E-01 |
| TSKS      | 19  | 5                  | 6.61E-01 | 5                  | 6.61E-01 | 4                  | 6.52E-01 | 4                  | 6.52E-01 | 1                  | 5.28E-01 | 1                  | 5.28E-01 |
| TTC16     | 9   | 4                  | 8.45E-01 | 4                  | 8.45E-01 | 3                  | 7.95E-01 | 3                  | 7.95E-01 | 1                  | 5.28E-01 | 1                  | 5.28E-01 |
| SLC26A3   | 7   | 6                  | 5.67E-01 | 6                  | 5.67E-01 | 5                  | 5.28E-01 | 5                  | 5.28E-01 | 1                  | 6.30E-01 | 1                  | 6.30E-01 |
| SDK2      | 17  | 14                 | 5.97E-01 | 14                 | 5.97E-01 | 11                 | 8.88E-01 | 11                 | 8.88E-01 | 6                  | 5.28E-01 | 6                  | 5.28E-01 |
| KIF23     | 15  | 1                  | 7.11E-01 | 2                  | 1.45E-01 | 1                  | 5.28E-01 | 2                  | 7.69E-01 | 1                  | 6.72E-01 | 2                  | 7.52E-01 |
| MASTL     | 10  | 3                  | 1.10E-01 | 3                  | 1.10E-01 | 1                  | 5.28E-01 | 1                  | 5.28E-01 | 2                  | 6.54E-01 | 2                  | 6.54E-01 |
| RANBP3    | 19  | 2                  | 5.06E-01 | 2                  | 5.06E-01 | 1                  | 5.28E-01 | 1                  | 5.28E-01 | 1                  | 6.12E-01 | 1                  | 6.12E-01 |
| OR1M1     | 19  | 1                  | 7.50E-01 | 1                  | 7.50E-01 | 1                  | 5.28E-01 | 1                  | 5.28E-01 |                    |          |                    |          |
| OR9A2     | 7   | 1                  | 7.50E-01 | 1                  | 7.50E-01 | 1                  | 5.28E-01 | 1                  | 5.28E-01 |                    |          |                    |          |
| C17orf74  | 17  | 3                  | 8.51E-02 | 4                  | 8.51E-02 | 1                  | 5.28E-01 | 2                  | 5.28E-01 | 2                  | 6.14E-01 | 3                  | 6.14E-01 |
| ANKEF1    | 20  | 1                  | 7.61E-01 | 1                  | 7.61E-01 | 1                  | 5.28E-01 | 1                  | 5.28E-01 |                    |          |                    |          |
| GRIA1     | 5   | 2                  | 3.35E-01 | 2                  | 3.35E-01 | 1                  | 5.28E-01 | 1                  | 5.28E-01 | 1                  | 6.06E-01 | 1                  | 6.06E-01 |
| ATP5O     | 21  | 1                  | 7.24E-01 | 1                  | 7.24E-01 | 1                  | 5.28E-01 | 1                  | 5.28E-01 |                    |          |                    |          |
| CYB5R2    | 11  | 1                  | 7.24E-01 | 1                  | 7.24E-01 | 1                  | 5.28E-01 | 1                  | 5.28E-01 |                    |          |                    |          |
| GPR35     | 2   | 4                  | 5.12E-01 | 4                  | 5.12E-01 | 3                  | 1.00E+00 | 3                  | 1.00E+00 | 3                  | 5.28E-01 | 3                  | 5.28E-01 |
| CCDC171   | 9   | 2                  | 3.62E-01 | 2                  | 3.62E-01 | 1                  | 5.28E-01 | 1                  | 5.28E-01 | 1                  | 6.10E-01 | 1                  | 6.10E-01 |
| RNPEPL1   | 2   | 1                  | 7.63E-01 | 1                  | 7.63E-01 | 1                  | 5.28E-01 | 1                  | 5.28E-01 |                    |          |                    |          |
| TMEM213   | 7   | 1                  | 7.63E-01 | 1                  | 7.63E-01 | 1                  | 5.28E-01 | 1                  | 5.28E-01 |                    |          |                    |          |
| CA2       | 8   | 1                  | 7.63E-01 | 1                  | 7.63E-01 | 1                  | 5.28E-01 | 1                  | 5.28E-01 |                    |          |                    |          |
| PPM1E     | 17  | 1                  | 7.63E-01 | 1                  | 7.63E-01 | 1                  | 5.28E-01 | 1                  | 5.28E-01 |                    |          |                    |          |
| AQP5      | 12  | 2                  | 3.53E-01 | 2                  | 3.53E-01 | 1                  | 5.28E-01 | 1                  | 5.28E-01 | 2                  | 6.41E-01 | 2                  | 6.41E-01 |
| E2F4      | 16  | 2                  | 3.53E-01 | 2                  | 3.53E-01 | 1                  | 5.28E-01 | 1                  | 5.28E-01 | 1                  | 6.30E-01 | 1                  | 6.30E-01 |
| C2orf73   | 2   | 2                  | 7.19E-01 | 2                  | 7.19E-01 | 2                  | 7.90E-01 | 2                  | 7.90E-01 | 2                  | 5.28E-01 | 2                  | 5.28E-01 |
| SLC4A7    | 3   | 1                  | 7.61E-01 | 1                  | 7.61E-01 | 1                  | 5.28E-01 | 1                  | 5.28E-01 |                    |          |                    |          |
| MAS1L     | 6   | 1                  | 7.61E-01 | 1                  | 7.61E-01 | 1                  | 5.28E-01 | 1                  | 5.28E-01 |                    |          |                    |          |
| DNAJB12   | 10  | 1                  | 7.61E-01 | 1                  | 7.61E-01 | 1                  | 5.28E-01 | 1                  | 5.28E-01 |                    |          |                    |          |
| RCOR3     | 1   | 1                  | 7.61E-01 | 1                  | 7.61E-01 | 1                  | 5.28E-01 | 1                  | 5.28E-01 |                    |          |                    |          |
| GLI1      | 12  | 1                  | 7.61E-01 | 1                  | 7.61E-01 | 1                  | 5.28E-01 | 1                  | 5.28E-01 |                    |          |                    |          |
| KIDINS220 | 2   | 6                  | 1.00E+00 | 6                  | 1.00E+00 | 5                  | 5.28E-01 | 5                  | 5.28E-01 | 2                  | 6.09E-01 | 2                  | 6.09E-01 |
| BIRC6     | 2   | 12                 | 7.32E-01 | 12                 | 7.32E-01 | 9                  | 5.28E-01 | 9                  | 5.28E-01 | 6                  | 6.74E-01 | 6                  | 6.74E-01 |
| PDCL3     | 2   | 2                  | 7.64E-01 | 2                  | 7.64E-01 | 2                  | 5.28E-01 | 2                  | 5.28E-01 | 1                  | 6.22E-01 | 1                  | 6.22E-01 |
| KIAA1549L | 11  | 6                  | 5.86E-01 | 6                  | 5.86E-01 | 5                  | 5.28E-01 | 5                  | 5.28E-01 | 1                  | 6.10E-01 | 1                  | 6.10E-01 |
| CASP8     | 2   | 1                  | 7.49E-01 | 1                  | 7.49E-01 | 1                  | 5.29E-01 | 1                  | 5.29E-01 |                    |          |                    |          |
| PRSS21    | 16  | 1                  | 7.06E-01 | 1                  | 7.06E-01 | 1                  | 5.29E-01 | 1                  | 5.29E-01 | 1                  | 6.72E-01 | 1                  | 6.72E-01 |
| COG2      | 1   | 1                  | 7.49E-01 | 1                  | 7.49E-01 | 1                  | 5.29E-01 | 1                  | 5.29E-01 |                    |          |                    |          |
| TK1       | 17  | 1                  | 7.49E-01 | 1                  | 7.49E-01 | 1                  | 5.29E-01 | 1                  | 5.29E-01 |                    |          |                    |          |
| ZNF500    | 16  | 1                  | 7.49E-01 | 1                  | 7.49E-01 | 1                  | 5.29E-01 | 1                  | 5.29E-01 |                    |          |                    |          |

| SetID    | Chr | ADEH- vs NA        |          |                    |          | ADEH+ vs ADEH-     |          |                    |          | ADEH+ vs NA        |          |                    |          |
|----------|-----|--------------------|----------|--------------------|----------|--------------------|----------|--------------------|----------|--------------------|----------|--------------------|----------|
|          |     | rare novel         |          | all                |          | rare novel         |          | all                |          | rare novel         |          | all                |          |
|          |     | N variants in test | p-value  | N variants in test | p-value  | N variants in test | p-value  | N variants in test | p-value  | N variants in test | p-value  | N variants in test | p-value  |
| GTF2H1   | 11  | 1                  | 7.53E-01 | 1                  | 7.53E-01 | 1                  | 5.29E-01 | 1                  | 5.29E-01 |                    |          |                    |          |
| AKIRIN2  | 6   | 1                  | 7.53E-01 | 1                  | 7.53E-01 | 1                  | 5.29E-01 | 1                  | 5.29E-01 |                    |          |                    |          |
| SLC4A10  | 2   | 1                  | 7.53E-01 | 1                  | 7.53E-01 | 1                  | 5.29E-01 | 1                  | 5.29E-01 |                    |          |                    |          |
| CD5L     | 1   | 2                  | 2.00E-01 | 2                  | 2.00E-01 | 2                  | 5.29E-01 | 2                  | 5.29E-01 |                    |          |                    |          |
| ESRP2    | 16  | 2                  | 7.51E-01 | 2                  | 7.51E-01 | 2                  | 5.29E-01 | 2                  | 5.29E-01 | 1                  | 6.13E-01 | 1                  | 6.13E-01 |
| MPG      | 16  | 3                  | 2.19E-01 | 3                  | 2.19E-01 | 3                  | 5.29E-01 | 3                  | 5.29E-01 |                    |          |                    |          |
| SEMA5A   | 5   | 3                  | 2.55E-01 | 3                  | 2.55E-01 | 2                  | 5.99E-01 | 2                  | 5.99E-01 | 3                  | 5.29E-01 | 3                  | 5.29E-01 |
| HOXC6    | 12  | 2                  | 5.66E-01 | 2                  | 5.66E-01 | 2                  | 5.29E-01 | 2                  | 5.29E-01 | 1                  | 1.00E+00 | 1                  | 1.00E+00 |
| BTN2A2   | 6   | 5                  | 8.53E-01 | 6                  | 6.99E-01 | 5                  | 5.29E-01 | 6                  | 6.58E-01 | 4                  | 7.08E-01 | 5                  | 7.16E-01 |
| EML4     | 2   | 5                  | 1.05E-01 | 5                  | 1.05E-01 | 2                  | 5.75E-01 | 2                  | 5.75E-01 | 3                  | 5.29E-01 | 3                  | 5.29E-01 |
| NUBPL    | 14  | 2                  | 4.04E-01 | 2                  | 4.04E-01 | 1                  | 5.29E-01 | 1                  | 5.29E-01 | 1                  | 6.45E-01 | 1                  | 6.45E-01 |
| PTPN6    | 12  | 1                  | 7.12E-01 | 1                  | 7.12E-01 | 1                  | 5.29E-01 | 1                  | 5.29E-01 | 1                  | 5.81E-01 | 1                  | 5.81E-01 |
| RAET1E   | 6   | 1                  | 7.50E-01 | 1                  | 7.50E-01 | 1                  | 5.29E-01 | 1                  | 5.29E-01 |                    |          |                    |          |
| DIRC2    | 3   | 2                  | 3.92E-01 | 2                  | 3.92E-01 | 1                  | 5.29E-01 | 1                  | 5.29E-01 | 1                  | 5.82E-01 | 1                  | 5.82E-01 |
| YBX2     | 17  | 1                  | 7.50E-01 | 1                  | 7.50E-01 | 1                  | 5.29E-01 | 1                  | 5.29E-01 |                    |          |                    |          |
| CCDC77   | 12  | 5                  | 7.04E-01 | 5                  | 7.04E-01 | 4                  | 5.29E-01 | 4                  | 5.29E-01 | 1                  | 5.92E-01 | 1                  | 5.92E-01 |
| NAPSA    | 19  | 1                  | 7.54E-01 | 1                  | 7.54E-01 | 1                  | 5.29E-01 | 1                  | 5.29E-01 |                    |          |                    |          |
| MAP1LC3B | 16  | 1                  | 7.54E-01 | 1                  | 7.54E-01 | 1                  | 5.29E-01 | 1                  | 5.29E-01 |                    |          |                    |          |
| KCNMA1   | 10  | 2                  | 4.29E-01 | 2                  | 4.29E-01 | 1                  | 5.29E-01 | 1                  | 5.29E-01 | 1                  | 6.23E-01 | 1                  | 6.23E-01 |
| LRIT3    | 4   | 2                  | 3.84E-01 | 2                  | 3.84E-01 | 1                  | 5.29E-01 | 1                  | 5.29E-01 | 1                  | 6.11E-01 | 1                  | 6.11E-01 |
| NEUROG3  | 10  | 1                  | 7.54E-01 | 1                  | 7.54E-01 | 1                  | 5.29E-01 | 1                  | 5.29E-01 |                    |          |                    |          |
| SLC35B4  | 7   | 1                  | 7.54E-01 | 1                  | 7.54E-01 | 1                  | 5.29E-01 | 1                  | 5.29E-01 |                    |          |                    |          |
| ELOF1    | 19  | 1                  | 7.54E-01 | 1                  | 7.54E-01 | 1                  | 5.29E-01 | 1                  | 5.29E-01 |                    |          |                    |          |
| SLC22A23 | 6   | 1                  | 7.54E-01 | 1                  | 7.54E-01 | 1                  | 5.29E-01 | 1                  | 5.29E-01 |                    |          |                    |          |
| NKG7     | 19  | 1                  | 7.50E-01 | 1                  | 7.50E-01 | 1                  | 5.30E-01 | 1                  | 5.30E-01 |                    |          |                    |          |
| DGCR8    | 22  | 1                  | 7.50E-01 | 1                  | 7.50E-01 | 1                  | 5.30E-01 | 1                  | 5.30E-01 |                    |          |                    |          |
| HDAC9    | 7   | 1                  | 7.20E-01 | 1                  | 7.20E-01 | 1                  | 5.30E-01 | 1                  | 5.30E-01 | 1                  | 6.28E-01 | 1                  | 6.28E-01 |
| OR10J3   | 1   | 2                  | 3.26E-01 | 2                  | 3.26E-01 | 1                  | 5.30E-01 | 1                  | 5.30E-01 | 1                  | 6.65E-01 | 1                  | 6.65E-01 |
| B9D2     | 19  | 1                  | 7.50E-01 | 1                  | 7.50E-01 | 1                  | 5.30E-01 | 1                  | 5.30E-01 |                    |          |                    |          |
| ABCC12   | 16  | 5                  | 5.65E-01 | 5                  | 5.65E-01 | 5                  | 1.00E+00 | 5                  | 1.00E+00 | 4                  | 5.30E-01 | 4                  | 5.30E-01 |
| WDR37    | 10  | 1                  | 7.47E-01 | 1                  | 7.47E-01 | 1                  | 5.30E-01 | 1                  | 5.30E-01 |                    |          |                    |          |
| GOT1L1   | 8   | 1                  | 7.47E-01 | 1                  | 7.47E-01 | 1                  | 5.30E-01 | 1                  | 5.30E-01 |                    |          |                    |          |
| CHODL    | 21  | 1                  | 7.47E-01 | 1                  | 7.47E-01 | 1                  | 5.30E-01 | 1                  | 5.30E-01 |                    |          |                    |          |
| HAPLN4   | 19  | 1                  | 7.47E-01 | 1                  | 7.47E-01 | 1                  | 5.30E-01 | 1                  | 5.30E-01 |                    |          |                    |          |
| SCN1A    | 2   | 5                  | 1.66E-01 | 5                  | 1.66E-01 | 5                  | 5.30E-01 | 5                  | 5.30E-01 |                    |          |                    |          |
| DDHD2    | 8   | 3                  | 1.29E-01 | 3                  | 1.29E-01 | 1                  | 5.30E-01 | 1                  | 5.30E-01 | 2                  | 6.10E-01 | 2                  | 6.10E-01 |
| BMPR1B   | 4   | 1                  | 7.57E-01 | 1                  | 7.57E-01 | 1                  | 5.30E-01 | 1                  | 5.30E-01 |                    |          |                    |          |
| RPL26L1  | 5   | 1                  | 7.57E-01 | 1                  | 7.57E-01 | 1                  | 5.30E-01 | 1                  | 5.30E-01 |                    |          |                    |          |
| AQP11    | 11  | 1                  | 7.57E-01 | 1                  | 7.57E-01 | 1                  | 5.30E-01 | 1                  | 5.30E-01 |                    |          |                    |          |
| GLIPR1   | 12  | 2                  | 4.92E-01 | 2                  | 4.92E-01 | 1                  | 5.30E-01 | 1                  | 5.30E-01 | 1                  | 5.77E-01 | 1                  | 5.77E-01 |
| DDB1     | 11  | 1                  | 7.57E-01 | 1                  | 7.57E-01 | 1                  | 5.30E-01 | 1                  | 5.30E-01 |                    |          |                    |          |
| MT4      | 16  | 1                  | 7.56E-01 | 1                  | 7.56E-01 | 1                  | 5.30E-01 | 1                  | 5.30E-01 |                    |          |                    |          |
| OR5T2    | 11  | 1                  | 7.56E-01 | 1                  | 7.56E-01 | 1                  | 5.30E-01 | 1                  | 5.30E-01 |                    |          |                    |          |
| TNKS     | 8   | 1                  | 7.56E-01 | 1                  | 7.56E-01 | 1                  | 5.30E-01 | 1                  | 5.30E-01 |                    |          |                    |          |
| SAMD15   | 14  | 1                  | 7.51E-01 | 1                  | 7.51E-01 | 1                  | 5.30E-01 | 1                  | 5.30E-01 |                    |          |                    |          |
| TP53INP1 | 8   | 1                  | 7.51E-01 | 1                  | 7.51E-01 | 1                  | 5.30E-01 | 1                  | 5.30E-01 |                    |          |                    |          |
| ZNF793   | 19  | 1                  | 7.51E-01 | 1                  | 7.51E-01 | 1                  | 5.30E-01 | 1                  | 5.30E-01 |                    |          |                    |          |
| LONRF2   | 2   | 1                  | 7.51E-01 | 1                  | 7.51E-01 | 1                  | 5.30E-01 | 1                  | 5.30E-01 |                    |          |                    |          |

| SetID        | Chr | ADEH- vs NA        |          |                    |          | ADEH+ vs ADEH-     |          |                    |          | ADEH+ vs NA        |          |                    |          |
|--------------|-----|--------------------|----------|--------------------|----------|--------------------|----------|--------------------|----------|--------------------|----------|--------------------|----------|
|              |     | rarenovel          |          | all                |          | rarenovel          |          | all                |          | rarenovel          |          | all                |          |
|              |     | N variants in test | p-value  | N variants in test | p-value  | N variants in test | p-value  | N variants in test | p-value  | N variants in test | p-value  | N variants in test | p-value  |
| EXOSC4       | 8   | 1                  | 6.91E-01 | 1                  | 6.91E-01 | 1                  | 5.30E-01 | 1                  | 5.30E-01 | 1                  | 6.57E-01 | 1                  | 6.57E-01 |
| MPZ          | 1   | 1                  | 7.51E-01 | 1                  | 7.51E-01 | 1                  | 5.30E-01 | 1                  | 5.30E-01 |                    |          |                    |          |
| TRIM39       | 6   | 1                  | 7.51E-01 | 1                  | 7.51E-01 | 1                  | 5.30E-01 | 1                  | 5.30E-01 |                    |          |                    |          |
| NPNT         | 4   | 5                  | 7.75E-01 | 5                  | 7.75E-01 | 4                  | 5.31E-01 | 4                  | 5.31E-01 | 2                  | 6.46E-01 | 2                  | 6.46E-01 |
| PGLYRP3      | 1   | 2                  | 7.27E-01 | 2                  | 7.27E-01 | 2                  | 1.00E+00 | 2                  | 1.00E+00 | 1                  | 5.31E-01 | 1                  | 5.31E-01 |
| KRTAP12-3    | 21  | 2                  | 5.33E-01 | 2                  | 5.33E-01 | 2                  | 5.31E-01 | 2                  | 5.31E-01 | 1                  | 5.82E-01 | 1                  | 5.82E-01 |
| GAS2L3       | 12  | 1                  | 7.62E-01 | 1                  | 7.62E-01 | 1                  | 5.31E-01 | 1                  | 5.31E-01 |                    |          |                    |          |
| FAM103A1     | 15  | 2                  | 3.67E-01 | 2                  | 3.67E-01 | 1                  | 5.31E-01 | 1                  | 5.31E-01 | 1                  | 6.04E-01 | 1                  | 6.04E-01 |
| LMX1B        | 9   | 1                  | 7.62E-01 | 1                  | 7.62E-01 | 1                  | 5.31E-01 | 1                  | 5.31E-01 |                    |          |                    |          |
| C14orf177    | 14  | 1                  | 7.62E-01 | 1                  | 7.62E-01 | 1                  | 5.31E-01 | 1                  | 5.31E-01 |                    |          |                    |          |
| CA13         | 8   | 1                  | 7.62E-01 | 1                  | 7.62E-01 | 1                  | 5.31E-01 | 1                  | 5.31E-01 |                    |          |                    |          |
| TNFRSF10A    | 8   | 2                  | 3.17E-01 | 2                  | 3.17E-01 | 1                  | 5.31E-01 | 1                  | 5.31E-01 | 2                  | 6.47E-01 | 2                  | 6.47E-01 |
| TPP1         | 11  | 2                  | 4.03E-01 | 2                  | 4.03E-01 | 1                  | 5.31E-01 | 1                  | 5.31E-01 | 1                  | 6.00E-01 | 1                  | 6.00E-01 |
| SAMD8        | 10  | 1                  | 7.62E-01 | 1                  | 7.62E-01 | 1                  | 5.31E-01 | 1                  | 5.31E-01 |                    |          |                    |          |
| EDNRA        | 4   | 1                  | 7.62E-01 | 1                  | 7.62E-01 | 1                  | 5.31E-01 | 1                  | 5.31E-01 |                    |          |                    |          |
| IKZF5        | 10  | 1                  | 7.62E-01 | 1                  | 7.62E-01 | 1                  | 5.31E-01 | 1                  | 5.31E-01 |                    |          |                    |          |
| NUCB1        | 19  | 3                  | 6.10E-01 | 3                  | 6.10E-01 | 3                  | 5.31E-01 | 3                  | 5.31E-01 | 1                  | 6.75E-01 | 1                  | 6.75E-01 |
| GRM6         | 5   | 8                  | 6.22E-01 | 8                  | 6.22E-01 | 8                  | 7.23E-01 | 8                  | 7.23E-01 | 3                  | 5.31E-01 | 3                  | 5.31E-01 |
| TNIP1        | 5   | 5                  | 6.40E-01 | 5                  | 6.40E-01 | 4                  | 5.32E-01 | 4                  | 5.32E-01 | 1                  | 5.37E-01 | 1                  | 5.37E-01 |
| PIGG         | 4   | 6                  | 6.13E-01 | 6                  | 6.13E-01 | 5                  | 5.32E-01 | 5                  | 5.32E-01 | 1                  | 6.42E-01 | 1                  | 6.42E-01 |
| STON1-GTF2A: | 2   | 6                  | 5.00E-01 | 6                  | 5.00E-01 | 4                  | 5.32E-01 | 4                  | 5.32E-01 | 3                  | 7.89E-01 | 3                  | 7.89E-01 |
| STON1        | 2   | 6                  | 5.00E-01 | 6                  | 5.00E-01 | 4                  | 5.32E-01 | 4                  | 5.32E-01 | 3                  | 7.89E-01 | 3                  | 7.89E-01 |
| TP53I3       | 2   | 4                  | 1.55E-01 | 4                  | 1.55E-01 | 4                  | 5.32E-01 | 4                  | 5.32E-01 |                    |          |                    |          |
| CYP20A1      | 2   | 4                  | 7.60E-01 | 4                  | 7.60E-01 | 4                  | 5.32E-01 | 4                  | 5.32E-01 | 1                  | 7.02E-01 | 1                  | 7.02E-01 |
| KRT74        | 12  | 4                  | 1.00E+00 | 5                  | 7.58E-01 | 4                  | 5.77E-01 | 5                  | 5.32E-01 | 4                  | 8.44E-01 | 5                  | 8.48E-01 |
| ARFGEF3      | 6   | 1                  | 7.61E-01 | 1                  | 7.61E-01 | 1                  | 5.32E-01 | 1                  | 5.32E-01 |                    |          |                    |          |
| CCM2         | 7   | 1                  | 7.61E-01 | 1                  | 7.61E-01 | 1                  | 5.32E-01 | 1                  | 5.32E-01 |                    |          |                    |          |
| BABAM1       | 19  | 1                  | 7.61E-01 | 1                  | 7.61E-01 | 1                  | 5.32E-01 | 1                  | 5.32E-01 |                    |          |                    |          |
| TIMM50       | 19  | 1                  | 7.61E-01 | 1                  | 7.61E-01 | 1                  | 5.32E-01 | 1                  | 5.32E-01 |                    |          |                    |          |
| ERC2         | 3   | 2                  | 3.90E-01 | 2                  | 3.90E-01 | 1                  | 5.32E-01 | 1                  | 5.32E-01 | 1                  | 6.28E-01 | 1                  | 6.28E-01 |
| LONP2        | 16  | 2                  | 4.24E-01 | 2                  | 4.24E-01 | 1                  | 5.32E-01 | 1                  | 5.32E-01 | 1                  | 6.00E-01 | 1                  | 6.00E-01 |
| CNTNAP5      | 2   | 1                  | 7.57E-01 | 1                  | 7.57E-01 | 1                  | 5.32E-01 | 1                  | 5.32E-01 |                    |          |                    |          |
| SBK2         | 19  | 1                  | 7.57E-01 | 1                  | 7.57E-01 | 1                  | 5.32E-01 | 1                  | 5.32E-01 |                    |          |                    |          |
| HLA-DPA1     | 6   | 1                  | 7.57E-01 | 1                  | 7.57E-01 | 1                  | 5.32E-01 | 1                  | 5.32E-01 |                    |          |                    |          |
| ITPKC        | 19  | 1                  | 6.68E-01 | 1                  | 6.68E-01 | 1                  | 5.32E-01 | 1                  | 5.32E-01 | 1                  | 6.69E-01 | 1                  | 6.69E-01 |
| ESRP1        | 8   | 1                  | 7.57E-01 | 1                  | 7.57E-01 | 1                  | 5.32E-01 | 1                  | 5.32E-01 |                    |          |                    |          |
| MED17        | 11  | 2                  | 3.76E-01 | 2                  | 3.76E-01 | 1                  | 5.32E-01 | 1                  | 5.32E-01 | 1                  | 6.25E-01 | 1                  | 6.25E-01 |
| NUBP2        | 16  | 1                  | 6.52E-01 | 1                  | 6.52E-01 | 1                  | 5.32E-01 | 1                  | 5.32E-01 | 1                  | 6.46E-01 | 1                  | 6.46E-01 |
| TIFAB        | 5   | 2                  | 4.79E-01 | 2                  | 4.79E-01 | 1                  | 5.32E-01 | 1                  | 5.32E-01 | 1                  | 6.22E-01 | 1                  | 6.22E-01 |
| CA11         | 19  | 1                  | 7.43E-01 | 1                  | 7.43E-01 | 1                  | 5.32E-01 | 1                  | 5.32E-01 |                    |          |                    |          |
| SCGB2A1      | 11  | 1                  | 7.43E-01 | 1                  | 7.43E-01 | 1                  | 5.32E-01 | 1                  | 5.32E-01 |                    |          |                    |          |
| SH2B3        | 12  | 4                  | 1.37E-01 | 4                  | 1.37E-01 | 4                  | 5.32E-01 | 4                  | 5.32E-01 |                    |          |                    |          |
| ADGB         | 6   | 5                  | 1.73E-01 | 5                  | 1.73E-01 | 2                  | 6.12E-01 | 2                  | 6.12E-01 | 3                  | 5.33E-01 | 3                  | 5.33E-01 |
| TNR          | 1   | 5                  | 7.29E-01 | 5                  | 7.29E-01 | 4                  | 6.16E-01 | 4                  | 6.16E-01 | 1                  | 5.33E-01 | 1                  | 5.33E-01 |
| EDN2         | 1   | 3                  | 7.14E-01 | 3                  | 7.14E-01 | 2                  | 6.21E-01 | 2                  | 6.21E-01 | 1                  | 5.33E-01 | 1                  | 5.33E-01 |
| CFAP221      | 2   | 1                  | 8.56E-02 | 1                  | 8.56E-02 |                    |          |                    |          | 1                  | 5.33E-01 | 1                  | 5.33E-01 |
| HIPK1        | 1   | 1                  | 8.56E-02 | 1                  | 8.56E-02 |                    |          |                    |          | 1                  | 5.33E-01 | 1                  | 5.33E-01 |
| ZNF264       | 19  | 4                  | 6.30E-01 | 4                  | 6.30E-01 | 3                  | 6.72E-01 | 3                  | 6.72E-01 | 1                  | 5.33E-01 | 1                  | 5.33E-01 |



| SetID    | Chr | ADEH- vs NA        |          |                    |          | ADEH+ vs ADEH-     |          |                    |          | ADEH+ vs NA        |          |                    |          |
|----------|-----|--------------------|----------|--------------------|----------|--------------------|----------|--------------------|----------|--------------------|----------|--------------------|----------|
|          |     | rare novel         |          | all                |          | rare novel         |          | all                |          | rare novel         |          | all                |          |
|          |     | N variants in test | p-value  | N variants in test | p-value  | N variants in test | p-value  | N variants in test | p-value  | N variants in test | p-value  | N variants in test | p-value  |
| PPP3CA   | 4   | 1                  | 8.56E-02 | 1                  | 8.56E-02 |                    |          |                    |          |                    |          |                    |          |
| C6orf58  | 6   | 2                  | 9.05E-01 | 2                  | 9.05E-01 | 2                  | 7.28E-01 | 2                  | 7.28E-01 | 1                  | 5.33E-01 | 1                  | 5.33E-01 |
| CABYR    | 18  | 2                  | 9.28E-01 | 2                  | 9.28E-01 | 2                  | 6.34E-01 | 2                  | 6.34E-01 | 1                  | 5.33E-01 | 1                  | 5.33E-01 |
| LRP2BP   | 4   | 4                  | 8.38E-01 | 4                  | 8.38E-01 | 3                  | 6.38E-01 | 3                  | 6.38E-01 | 1                  | 5.33E-01 | 1                  | 5.33E-01 |
| NPFRR1   | 10  | 5                  | 4.36E-01 | 6                  | 7.06E-01 | 3                  | 5.96E-01 | 4                  | 5.33E-01 | 2                  | 6.51E-01 | 3                  | 6.56E-01 |
| ATRIP    | 3   | 1                  | 7.61E-01 | 1                  | 7.61E-01 | 1                  | 5.33E-01 | 1                  | 5.33E-01 |                    |          |                    |          |
| CNOT6    | 5   | 1                  | 7.61E-01 | 1                  | 7.61E-01 | 1                  | 5.33E-01 | 1                  | 5.33E-01 |                    |          |                    |          |
| CCDC105  | 19  | 1                  | 7.61E-01 | 1                  | 7.61E-01 | 1                  | 5.33E-01 | 1                  | 5.33E-01 |                    |          |                    |          |
| GART     | 21  | 1                  | 7.61E-01 | 1                  | 7.61E-01 | 1                  | 5.33E-01 | 1                  | 5.33E-01 |                    |          |                    |          |
| SSC4D    | 7   | 1                  | 7.61E-01 | 1                  | 7.61E-01 | 1                  | 5.33E-01 | 1                  | 5.33E-01 |                    |          |                    |          |
| IFIT1B   | 10  | 1                  | 7.61E-01 | 1                  | 7.61E-01 | 1                  | 5.33E-01 | 1                  | 5.33E-01 |                    |          |                    |          |
| KLHDC1   | 14  | 2                  | 3.75E-01 | 2                  | 3.75E-01 | 1                  | 5.33E-01 | 1                  | 5.33E-01 | 1                  | 6.85E-01 | 1                  | 6.85E-01 |
| TERF2    | 16  | 1                  | 7.61E-01 | 1                  | 7.61E-01 | 1                  | 5.33E-01 | 1                  | 5.33E-01 |                    |          |                    |          |
| CDC40    | 6   | 1                  | 7.61E-01 | 1                  | 7.61E-01 | 1                  | 5.33E-01 | 1                  | 5.33E-01 |                    |          |                    |          |
| HABP4    | 9   | 1                  | 7.61E-01 | 1                  | 7.61E-01 | 1                  | 5.33E-01 | 1                  | 5.33E-01 |                    |          |                    |          |
| DCUN1D1  | 3   | 1                  | 7.61E-01 | 1                  | 7.61E-01 | 1                  | 5.33E-01 | 1                  | 5.33E-01 |                    |          |                    |          |
| PCNP     | 3   | 1                  | 7.61E-01 | 1                  | 7.61E-01 | 1                  | 5.33E-01 | 1                  | 5.33E-01 |                    |          |                    |          |
| RNASEH1  | 2   | 1                  | 7.61E-01 | 1                  | 7.61E-01 | 1                  | 5.33E-01 | 1                  | 5.33E-01 |                    |          |                    |          |
| AGA      | 4   | 1                  | 7.23E-01 | 1                  | 7.23E-01 | 1                  | 7.26E-01 | 1                  | 7.26E-01 | 1                  | 5.33E-01 | 1                  | 5.33E-01 |
| AOX1     | 2   | 4                  | 9.63E-02 | 4                  | 9.63E-02 | 5                  | 6.20E-01 | 5                  | 6.20E-01 | 1                  | 5.33E-01 | 1                  | 5.33E-01 |
| SLC2A4   | 17  | 2                  | 3.13E-01 | 2                  | 3.13E-01 | 2                  | 7.85E-01 | 2                  | 7.85E-01 | 1                  | 5.33E-01 | 1                  | 5.33E-01 |
| HIST1H1A | 6   | 1                  | 7.61E-01 | 1                  | 7.61E-01 | 2                  | 6.88E-01 | 2                  | 6.88E-01 | 1                  | 5.33E-01 | 1                  | 5.33E-01 |
| ZNF598   | 16  | 1                  | 7.48E-01 | 1                  | 7.48E-01 | 2                  | 6.43E-01 | 2                  | 6.43E-01 | 1                  | 5.33E-01 | 1                  | 5.33E-01 |
| MAP3K11  | 11  | 3                  | 3.25E-01 | 3                  | 3.25E-01 | 4                  | 8.11E-01 | 4                  | 8.11E-01 | 1                  | 5.33E-01 | 1                  | 5.33E-01 |
| IGFALS   | 16  | 2                  | 5.70E-01 | 2                  | 5.70E-01 | 3                  | 7.44E-01 | 3                  | 7.44E-01 | 1                  | 5.33E-01 | 1                  | 5.33E-01 |
| ATP11A   | 13  | 1                  | 7.45E-01 | 1                  | 7.45E-01 | 2                  | 6.48E-01 | 2                  | 6.48E-01 | 1                  | 5.33E-01 | 1                  | 5.33E-01 |
| B4GALT6  | 18  | 1                  | 7.63E-01 | 1                  | 7.63E-01 | 1                  | 5.33E-01 | 1                  | 5.33E-01 |                    |          |                    |          |
| BMP6     | 6   | 1                  | 7.63E-01 | 1                  | 7.63E-01 | 1                  | 5.33E-01 | 1                  | 5.33E-01 |                    |          |                    |          |
| PEX12    | 17  | 1                  | 7.27E-01 | 1                  | 7.27E-01 | 1                  | 5.33E-01 | 1                  | 5.33E-01 | 1                  | 6.41E-01 | 1                  | 6.41E-01 |
| TCF12    | 15  | 3                  | 1.43E-01 | 3                  | 1.43E-01 | 1                  | 5.33E-01 | 1                  | 5.33E-01 | 2                  | 6.32E-01 | 2                  | 6.32E-01 |
| OR2C3    | 1   | 1                  | 7.63E-01 | 1                  | 7.63E-01 | 1                  | 5.33E-01 | 1                  | 5.33E-01 |                    |          |                    |          |
| CCDC122  | 13  | 1                  | 7.63E-01 | 1                  | 7.63E-01 | 1                  | 5.33E-01 | 1                  | 5.33E-01 |                    |          |                    |          |
| DLST     | 14  | 2                  | 3.50E-01 | 2                  | 3.50E-01 | 1                  | 5.33E-01 | 1                  | 5.33E-01 | 1                  | 6.45E-01 | 1                  | 6.45E-01 |
| SH2D1B   | 1   | 1                  | 7.63E-01 | 2                  | 1.00E+00 | 1                  | 5.33E-01 | 2                  | 6.98E-01 |                    |          | 1                  | 5.99E-01 |
| TCF3     | 19  | 6                  | 2.17E-01 | 6                  | 2.17E-01 | 6                  | 5.66E-01 | 6                  | 5.66E-01 | 3                  | 5.34E-01 | 3                  | 5.34E-01 |
| OR5C1    | 9   | 3                  | 4.32E-01 | 3                  | 4.32E-01 | 2                  | 5.34E-01 | 2                  | 5.34E-01 | 2                  | 6.44E-01 | 2                  | 6.44E-01 |
| ANGPTL6  | 19  | 4                  | 7.03E-01 | 4                  | 7.03E-01 | 4                  | 5.34E-01 | 4                  | 5.34E-01 | 2                  | 1.00E+00 | 2                  | 1.00E+00 |
| MKRN3    | 15  | 1                  | 7.58E-01 | 1                  | 7.58E-01 | 1                  | 5.35E-01 | 1                  | 5.35E-01 |                    |          |                    |          |
| ITGA5    | 12  | 2                  | 2.38E-01 | 2                  | 2.38E-01 | 1                  | 5.35E-01 | 1                  | 5.35E-01 | 1                  | 6.51E-01 | 1                  | 6.51E-01 |
| RPTOR    | 17  | 1                  | 7.58E-01 | 1                  | 7.58E-01 | 1                  | 5.35E-01 | 1                  | 5.35E-01 |                    |          |                    |          |
| ZBTB5    | 9   | 1                  | 7.58E-01 | 1                  | 7.58E-01 | 1                  | 5.35E-01 | 1                  | 5.35E-01 |                    |          |                    |          |
| PRPSAP2  | 17  | 1                  | 7.12E-01 | 1                  | 7.12E-01 | 1                  | 5.35E-01 | 1                  | 5.35E-01 | 1                  | 6.47E-01 | 1                  | 6.47E-01 |
| FAM20C   | 7   | 2                  | 4.07E-01 | 2                  | 4.07E-01 | 1                  | 5.35E-01 | 1                  | 5.35E-01 | 1                  | 6.05E-01 | 1                  | 6.05E-01 |
| PPARGC1A | 4   | 1                  | 7.58E-01 | 1                  | 7.58E-01 | 1                  | 5.35E-01 | 1                  | 5.35E-01 |                    |          |                    |          |
| TNNT1    | 19  | 1                  | 7.58E-01 | 1                  | 7.58E-01 | 1                  | 5.35E-01 | 1                  | 5.35E-01 |                    |          |                    |          |
| GSTM3    | 1   | 1                  | 7.58E-01 | 1                  | 7.58E-01 | 1                  | 5.35E-01 | 1                  | 5.35E-01 |                    |          |                    |          |
| EHBP1    | 2   | 8                  | 1.09E-01 | 8                  | 1.09E-01 | 6                  | 8.18E-01 | 6                  | 8.18E-01 | 5                  | 5.35E-01 | 5                  | 5.35E-01 |
| SDHC     | 1   | 1                  | 7.57E-01 | 1                  | 7.57E-01 | 1                  | 5.35E-01 | 1                  | 5.35E-01 |                    |          |                    |          |

| SetID    | Chr | ADEH- vs NA        |          |                    |          | ADEH+ vs ADEH-     |          |                    |          | ADEH+ vs NA        |          |                    |          |
|----------|-----|--------------------|----------|--------------------|----------|--------------------|----------|--------------------|----------|--------------------|----------|--------------------|----------|
|          |     | rare novel         |          | all                |          | rare novel         |          | all                |          | rare novel         |          | all                |          |
|          |     | N variants in test | p-value  | N variants in test | p-value  | N variants in test | p-value  | N variants in test | p-value  | N variants in test | p-value  | N variants in test | p-value  |
| PWWP2B   | 10  | 1                  | 7.57E-01 | 1                  | 7.57E-01 | 1                  | 5.35E-01 | 1                  | 5.35E-01 |                    |          |                    |          |
| SCN4B    | 11  | 1                  | 7.57E-01 | 1                  | 7.57E-01 | 1                  | 5.35E-01 | 1                  | 5.35E-01 |                    |          |                    |          |
| TOP1MT   | 8   | 7                  | 5.40E-01 | 8                  | 5.40E-01 | 7                  | 5.40E-01 | 8                  | 5.40E-01 | 4                  | 5.35E-01 | 5                  | 5.35E-01 |
| GNA14    | 9   | 2                  | 5.43E-01 | 2                  | 5.43E-01 | 2                  | 5.35E-01 | 2                  | 5.35E-01 | 1                  | 6.05E-01 | 1                  | 6.05E-01 |
| GIMAP7   | 7   | 1                  | 7.58E-01 | 2                  | 7.83E-01 | 1                  | 5.46E-01 | 2                  | 5.53E-01 |                    |          | 1                  | 5.35E-01 |
| MRPL47   | 3   | 2                  | 3.91E-01 | 2                  | 3.91E-01 | 1                  | 5.35E-01 | 1                  | 5.35E-01 | 1                  | 5.82E-01 | 1                  | 5.82E-01 |
| GPAA1    | 8   | 1                  | 7.49E-01 | 1                  | 7.49E-01 | 1                  | 5.35E-01 | 1                  | 5.35E-01 |                    |          |                    |          |
| CHST15   | 10  | 1                  | 7.49E-01 | 1                  | 7.49E-01 | 1                  | 5.35E-01 | 1                  | 5.35E-01 |                    |          |                    |          |
| FOXF1    | 16  | 1                  | 7.49E-01 | 1                  | 7.49E-01 | 1                  | 5.35E-01 | 1                  | 5.35E-01 |                    |          |                    |          |
| CTSC     | 11  | 3                  | 6.02E-01 | 3                  | 6.02E-01 | 2                  | 5.35E-01 | 2                  | 5.35E-01 | 1                  | 6.12E-01 | 1                  | 6.12E-01 |
| SSRP1    | 11  | 1                  | 7.61E-01 | 1                  | 7.61E-01 | 1                  | 5.36E-01 | 1                  | 5.36E-01 |                    |          |                    |          |
| KCNE3    | 11  | 1                  | 7.61E-01 | 1                  | 7.61E-01 | 1                  | 5.36E-01 | 1                  | 5.36E-01 |                    |          |                    |          |
| SLC2A13  | 12  | 1                  | 7.61E-01 | 1                  | 7.61E-01 | 1                  | 5.36E-01 | 1                  | 5.36E-01 |                    |          |                    |          |
| IDO1     | 8   | 1                  | 7.61E-01 | 1                  | 7.61E-01 | 1                  | 5.36E-01 | 1                  | 5.36E-01 |                    |          |                    |          |
| TBX19    | 1   | 1                  | 7.60E-01 | 1                  | 7.60E-01 | 1                  | 5.36E-01 | 1                  | 5.36E-01 |                    |          |                    |          |
| C7orf25  | 7   | 1                  | 7.60E-01 | 1                  | 7.60E-01 | 1                  | 5.36E-01 | 1                  | 5.36E-01 |                    |          |                    |          |
| ZNF235   | 19  | 1                  | 7.27E-01 | 1                  | 7.27E-01 | 1                  | 5.36E-01 | 1                  | 5.36E-01 | 1                  | 6.75E-01 | 1                  | 6.75E-01 |
| LRRC52   | 1   | 1                  | 7.60E-01 | 1                  | 7.60E-01 | 1                  | 5.36E-01 | 1                  | 5.36E-01 |                    |          |                    |          |
| BEND5    | 1   | 1                  | 7.60E-01 | 1                  | 7.60E-01 | 1                  | 5.36E-01 | 1                  | 5.36E-01 |                    |          |                    |          |
| RAB27B   | 18  | 1                  | 7.60E-01 | 1                  | 7.60E-01 | 1                  | 5.36E-01 | 1                  | 5.36E-01 |                    |          |                    |          |
| ADAM23   | 2   | 1                  | 7.52E-01 | 1                  | 7.52E-01 | 1                  | 5.36E-01 | 1                  | 5.36E-01 |                    |          |                    |          |
| TIMM21   | 18  | 1                  | 7.52E-01 | 1                  | 7.52E-01 | 1                  | 5.36E-01 | 1                  | 5.36E-01 |                    |          |                    |          |
| CCNA1    | 13  | 1                  | 7.52E-01 | 1                  | 7.52E-01 | 1                  | 5.36E-01 | 1                  | 5.36E-01 |                    |          |                    |          |
| C9orf116 | 9   | 1                  | 7.52E-01 | 1                  | 7.52E-01 | 1                  | 5.36E-01 | 1                  | 5.36E-01 |                    |          |                    |          |
| SSB      | 2   | 1                  | 7.52E-01 | 1                  | 7.52E-01 | 1                  | 5.36E-01 | 1                  | 5.36E-01 |                    |          |                    |          |
| ZNF710   | 15  | 2                  | 3.40E-01 | 2                  | 3.40E-01 | 1                  | 5.36E-01 | 1                  | 5.36E-01 | 1                  | 6.06E-01 | 1                  | 6.06E-01 |
| VSTM1    | 19  | 1                  | 7.60E-01 | 1                  | 7.60E-01 | 1                  | 5.36E-01 | 1                  | 5.36E-01 |                    |          |                    |          |
| BCKDK    | 16  | 2                  | 3.40E-01 | 2                  | 3.40E-01 | 1                  | 5.36E-01 | 1                  | 5.36E-01 | 1                  | 6.09E-01 | 1                  | 6.09E-01 |
| RFC3     | 13  | 2                  | 3.56E-01 | 2                  | 3.56E-01 | 1                  | 5.36E-01 | 1                  | 5.36E-01 | 1                  | 6.29E-01 | 1                  | 6.29E-01 |
| WDR74    | 11  | 1                  | 6.86E-01 | 1                  | 6.86E-01 | 1                  | 5.36E-01 | 1                  | 5.36E-01 | 1                  | 6.74E-01 | 1                  | 6.74E-01 |
| GRM4     | 6   | 1                  | 7.48E-01 | 1                  | 7.48E-01 | 1                  | 5.36E-01 | 1                  | 5.36E-01 |                    |          |                    |          |
| OR8I2    | 11  | 1                  | 7.48E-01 | 2                  | 4.81E-01 | 1                  | 5.36E-01 | 2                  | 7.13E-01 |                    |          | 1                  | 6.43E-01 |
| DLG1     | 3   | 1                  | 7.48E-01 | 2                  | 7.37E-01 | 1                  | 5.36E-01 | 2                  | 6.22E-01 |                    |          | 1                  | 1.00E+00 |
| CDK1     | 10  | 1                  | 7.48E-01 | 1                  | 7.48E-01 | 1                  | 5.36E-01 | 1                  | 5.36E-01 |                    |          |                    |          |
| LSMEM2   | 3   | 1                  | 7.48E-01 | 1                  | 7.48E-01 | 1                  | 5.36E-01 | 1                  | 5.36E-01 |                    |          |                    |          |
| GPSM3    | 6   | 1                  | 7.47E-01 | 1                  | 7.47E-01 | 1                  | 5.36E-01 | 1                  | 5.36E-01 |                    |          |                    |          |
| NSL1     | 1   | 1                  | 7.47E-01 | 1                  | 7.47E-01 | 1                  | 5.36E-01 | 1                  | 5.36E-01 |                    |          |                    |          |
| MCHR1    | 22  | 1                  | 7.47E-01 | 1                  | 7.47E-01 | 1                  | 5.36E-01 | 1                  | 5.36E-01 |                    |          |                    |          |
| TMEM109  | 11  | 1                  | 7.47E-01 | 1                  | 7.47E-01 | 1                  | 5.36E-01 | 1                  | 5.36E-01 |                    |          |                    |          |
| FANCF    | 11  | 1                  | 7.47E-01 | 1                  | 7.47E-01 | 1                  | 5.36E-01 | 1                  | 5.36E-01 |                    |          |                    |          |
| CEP250   | 20  | 1                  | 7.47E-01 | 1                  | 7.47E-01 | 1                  | 5.36E-01 | 1                  | 5.36E-01 |                    |          |                    |          |
| DYX1C1   | 15  | 3                  | 7.44E-01 | 5                  | 5.08E-01 | 3                  | 5.36E-01 | 5                  | 6.06E-01 | 1                  | 6.25E-01 | 3                  | 1.00E+00 |
| CCDC155  | 19  | 2                  | 4.37E-01 | 2                  | 4.37E-01 | 1                  | 5.36E-01 | 1                  | 5.36E-01 | 1                  | 6.25E-01 | 1                  | 6.25E-01 |
| NIM1K    | 5   | 2                  | 3.41E-01 | 2                  | 3.41E-01 | 1                  | 5.36E-01 | 1                  | 5.36E-01 | 1                  | 6.64E-01 | 1                  | 6.64E-01 |
| BHLHE22  | 8   | 1                  | 7.62E-01 | 1                  | 7.62E-01 | 1                  | 5.36E-01 | 1                  | 5.36E-01 |                    |          |                    |          |
| MYOZ2    | 4   | 1                  | 7.62E-01 | 1                  | 7.62E-01 | 1                  | 5.36E-01 | 1                  | 5.36E-01 |                    |          |                    |          |
| OR4K1    | 14  | 1                  | 7.62E-01 | 2                  | 7.65E-01 | 1                  | 5.36E-01 | 2                  | 5.37E-01 |                    |          | 1                  | 5.93E-01 |
| TTC6     | 14  | 4                  | 1.49E-01 | 4                  | 1.49E-01 | 4                  | 5.36E-01 | 4                  | 5.36E-01 |                    |          |                    |          |

| SetID         | Chr | ADEH- vs NA        |          |                    |          | ADEH+ vs ADEH-     |          |                    |          | ADEH+ vs NA        |          |                    |          |
|---------------|-----|--------------------|----------|--------------------|----------|--------------------|----------|--------------------|----------|--------------------|----------|--------------------|----------|
|               |     | rare novel         |          | all                |          | rare novel         |          | all                |          | rare novel         |          | all                |          |
|               |     | N variants in test | p-value  | N variants in test | p-value  | N variants in test | p-value  | N variants in test | p-value  | N variants in test | p-value  | N variants in test | p-value  |
| NOL6          | 9   | 12                 | 8.24E-01 | 12                 | 8.24E-01 | 10                 | 8.33E-01 | 10                 | 8.33E-01 | 6                  | 5.37E-01 | 6                  | 5.37E-01 |
| CACNA1B       | 9   | 5                  | 8.12E-01 | 5                  | 8.12E-01 | 4                  | 6.21E-01 | 4                  | 6.21E-01 | 1                  | 5.37E-01 | 1                  | 5.37E-01 |
| TMEM117       | 12  | 1                  | 6.81E-02 | 1                  | 6.81E-02 |                    |          |                    |          | 1                  | 5.37E-01 | 1                  | 5.37E-01 |
| CPQ           | 8   | 3                  | 6.34E-01 | 3                  | 6.34E-01 | 2                  | 6.39E-01 | 2                  | 6.39E-01 | 1                  | 5.37E-01 | 1                  | 5.37E-01 |
| ARHGAP42      | 11  | 2                  | 3.42E-01 | 2                  | 3.42E-01 | 1                  | 5.55E-01 | 1                  | 5.55E-01 | 1                  | 5.37E-01 | 1                  | 5.37E-01 |
| OR1G1         | 17  | 1                  | 6.81E-02 | 1                  | 6.81E-02 |                    |          |                    |          | 1                  | 5.37E-01 | 1                  | 5.37E-01 |
| PPA1          | 10  | 1                  | 6.81E-02 | 1                  | 6.81E-02 |                    |          |                    |          | 1                  | 5.37E-01 | 1                  | 5.37E-01 |
| EML1          | 14  | 1                  | 6.81E-02 | 1                  | 6.81E-02 |                    |          |                    |          | 1                  | 5.37E-01 | 1                  | 5.37E-01 |
| IBA57         | 1   | 1                  | 6.81E-02 | 1                  | 6.81E-02 |                    |          |                    |          | 1                  | 5.37E-01 | 1                  | 5.37E-01 |
| PPME1         | 11  | 1                  | 6.81E-02 | 1                  | 6.81E-02 |                    |          |                    |          | 1                  | 5.37E-01 | 1                  | 5.37E-01 |
| PRICKLE2      | 3   | 1                  | 6.81E-02 | 1                  | 6.81E-02 |                    |          |                    |          | 1                  | 5.37E-01 | 1                  | 5.37E-01 |
| KDM4A         | 1   | 5                  | 1.68E-01 | 5                  | 1.68E-01 | 5                  | 5.37E-01 | 5                  | 5.37E-01 |                    |          |                    |          |
| PDIA5         | 3   | 2                  | 7.48E-01 | 2                  | 7.48E-01 | 2                  | 5.37E-01 | 2                  | 5.37E-01 | 1                  | 6.75E-01 | 1                  | 6.75E-01 |
| ZNF254        | 19  | 7                  | 7.73E-01 | 7                  | 7.73E-01 | 6                  | 5.37E-01 | 6                  | 5.37E-01 | 2                  | 5.53E-01 | 2                  | 5.53E-01 |
| SLC26A6       | 3   | 4                  | 4.21E-01 | 5                  | 4.40E-01 | 3                  | 6.53E-01 | 4                  | 7.39E-01 | 3                  | 5.37E-01 | 4                  | 5.61E-01 |
| EIF2B2        | 14  | 1                  | 7.55E-01 | 1                  | 7.55E-01 | 1                  | 5.37E-01 | 1                  | 5.37E-01 |                    |          |                    |          |
| BACE2         | 21  | 1                  | 7.54E-01 | 1                  | 7.54E-01 | 1                  | 5.37E-01 | 1                  | 5.37E-01 |                    |          |                    |          |
| DDX42         | 17  | 1                  | 7.54E-01 | 1                  | 7.54E-01 | 1                  | 5.37E-01 | 1                  | 5.37E-01 |                    |          |                    |          |
| TTC12         | 11  | 1                  | 7.54E-01 | 1                  | 7.54E-01 | 1                  | 5.37E-01 | 1                  | 5.37E-01 |                    |          |                    |          |
| PCYT1A        | 3   | 1                  | 7.54E-01 | 1                  | 7.54E-01 | 1                  | 5.37E-01 | 1                  | 5.37E-01 |                    |          |                    |          |
| HGD           | 3   | 2                  | 4.57E-01 | 2                  | 4.57E-01 | 1                  | 5.37E-01 | 1                  | 5.37E-01 | 1                  | 6.18E-01 | 1                  | 6.18E-01 |
| DIRAS1        | 19  | 1                  | 7.54E-01 | 1                  | 7.54E-01 | 1                  | 5.37E-01 | 1                  | 5.37E-01 |                    |          |                    |          |
| C18orf32      | 18  | 2                  | 4.84E-01 | 2                  | 4.84E-01 | 1                  | 5.37E-01 | 1                  | 5.37E-01 | 1                  | 6.63E-01 | 1                  | 6.63E-01 |
| RPL17-C18orf3 | 18  | 2                  | 4.84E-01 | 2                  | 4.84E-01 | 1                  | 5.37E-01 | 1                  | 5.37E-01 | 1                  | 6.63E-01 | 1                  | 6.63E-01 |
| SULF2         | 20  | 1                  | 7.56E-01 | 1                  | 7.56E-01 | 1                  | 5.37E-01 | 1                  | 5.37E-01 |                    |          |                    |          |
| LRRC6         | 8   | 2                  | 4.47E-01 | 3                  | 3.21E-01 | 1                  | 5.37E-01 | 2                  | 6.87E-01 | 1                  | 6.56E-01 | 2                  | 7.92E-01 |
| ZNF627        | 19  | 1                  | 7.56E-01 | 1                  | 7.56E-01 | 1                  | 5.37E-01 | 1                  | 5.37E-01 |                    |          |                    |          |
| CDK12         | 17  | 1                  | 7.56E-01 | 1                  | 7.56E-01 | 1                  | 5.37E-01 | 1                  | 5.37E-01 |                    |          |                    |          |
| CERS6         | 2   | 1                  | 7.56E-01 | 1                  | 7.56E-01 | 1                  | 5.37E-01 | 1                  | 5.37E-01 |                    |          |                    |          |
| P2RY1         | 3   | 1                  | 7.56E-01 | 1                  | 7.56E-01 | 1                  | 5.37E-01 | 1                  | 5.37E-01 |                    |          |                    |          |
| OR5M3         | 11  | 2                  | 1.00E+00 | 3                  | 1.00E+00 | 2                  | 5.37E-01 | 3                  | 1.00E+00 | 2                  | 6.48E-01 | 3                  | 9.14E-01 |
| TCTE1         | 6   | 5                  | 5.13E-01 | 6                  | 5.27E-01 | 3                  | 6.28E-01 | 4                  | 5.38E-01 | 2                  | 6.32E-01 | 3                  | 5.50E-01 |
| INTS12        | 4   | 1                  | 7.58E-01 | 1                  | 7.58E-01 | 1                  | 5.38E-01 | 1                  | 5.38E-01 |                    |          |                    |          |
| NDC1          | 1   | 2                  | 4.20E-01 | 2                  | 4.20E-01 | 1                  | 5.38E-01 | 1                  | 5.38E-01 | 1                  | 6.36E-01 | 1                  | 6.36E-01 |
| GMPPA         | 2   | 1                  | 7.58E-01 | 1                  | 7.58E-01 | 1                  | 5.38E-01 | 1                  | 5.38E-01 |                    |          |                    |          |
| SGCA          | 17  | 1                  | 6.81E-01 | 1                  | 6.81E-01 | 1                  | 5.38E-01 | 1                  | 5.38E-01 | 1                  | 6.18E-01 | 1                  | 6.18E-01 |
| ITGA3         | 17  | 4                  | 1.00E+00 | 4                  | 1.00E+00 | 3                  | 5.68E-01 | 3                  | 5.68E-01 | 2                  | 5.38E-01 | 2                  | 5.38E-01 |
| BRDT          | 1   | 5                  | 5.95E-01 | 6                  | 2.48E-01 | 4                  | 5.38E-01 | 5                  | 1.00E+00 | 1                  | 6.58E-01 | 2                  | 8.66E-01 |
| GAK           | 4   | 5                  | 5.34E-01 | 5                  | 5.34E-01 | 4                  | 1.00E+00 | 4                  | 1.00E+00 | 2                  | 5.38E-01 | 2                  | 5.38E-01 |
| CCDC6         | 10  |                    |          | 1                  | 1.00E+00 |                    |          | 1                  | 5.91E-01 |                    |          | 1                  | 5.38E-01 |
| TMEM201       | 1   | 2                  | 2.84E-01 | 2                  | 2.84E-01 | 2                  | 5.39E-01 | 2                  | 5.39E-01 |                    |          |                    |          |
| ARHGAP11A     | 15  | 1                  | 7.52E-01 | 1                  | 7.52E-01 | 1                  | 5.39E-01 | 1                  | 5.39E-01 |                    |          |                    |          |
| FGF8          | 10  | 1                  | 7.52E-01 | 1                  | 7.52E-01 | 1                  | 5.39E-01 | 1                  | 5.39E-01 |                    |          |                    |          |
| GSX1          | 13  | 1                  | 7.52E-01 | 1                  | 7.52E-01 | 1                  | 5.39E-01 | 1                  | 5.39E-01 |                    |          |                    |          |
| NBPF7         | 1   | 1                  | 7.52E-01 | 1                  | 7.52E-01 | 1                  | 5.39E-01 | 1                  | 5.39E-01 |                    |          |                    |          |
| CDK5RAP2      | 9   | 6                  | 8.37E-02 | 6                  | 8.37E-02 | 5                  | 5.39E-01 | 5                  | 5.39E-01 | 3                  | 1.00E+00 | 3                  | 1.00E+00 |
| SLC39A5       | 12  | 5                  | 1.50E-01 | 5                  | 1.50E-01 | 5                  | 5.39E-01 | 5                  | 5.39E-01 | 2                  | 1.00E+00 | 2                  | 1.00E+00 |
| SLC25A33      | 1   | 1                  | 7.60E-01 | 1                  | 7.60E-01 | 1                  | 5.39E-01 | 1                  | 5.39E-01 |                    |          |                    |          |

| SetID        | Chr | ADEH- vs NA        |          |                    |          | ADEH+ vs ADEH-     |          |                    |          | ADEH+ vs NA        |          |                    |          |
|--------------|-----|--------------------|----------|--------------------|----------|--------------------|----------|--------------------|----------|--------------------|----------|--------------------|----------|
|              |     | rare novel         |          | all                |          | rare novel         |          | all                |          | rare novel         |          | all                |          |
|              |     | N variants in test | p-value  | N variants in test | p-value  | N variants in test | p-value  | N variants in test | p-value  | N variants in test | p-value  | N variants in test | p-value  |
| RBM38        | 20  | 1                  | 7.60E-01 | 1                  | 7.60E-01 | 1                  | 5.39E-01 | 1                  | 5.39E-01 |                    |          |                    |          |
| NT5DC1       | 6   | 1                  | 7.60E-01 | 1                  | 7.60E-01 | 1                  | 5.39E-01 | 1                  | 5.39E-01 |                    |          |                    |          |
| RBAK         | 7   | 1                  | 7.60E-01 | 1                  | 7.60E-01 | 1                  | 5.39E-01 | 1                  | 5.39E-01 |                    |          |                    |          |
| PGD          | 1   | 2                  | 3.81E-01 | 2                  | 3.81E-01 | 1                  | 5.39E-01 | 1                  | 5.39E-01 | 1                  | 6.50E-01 | 1                  | 6.50E-01 |
| OSBP         | 11  | 1                  | 7.36E-01 | 1                  | 7.36E-01 | 1                  | 5.39E-01 | 1                  | 5.39E-01 | 1                  | 6.17E-01 | 1                  | 6.17E-01 |
| C7orf60      | 7   | 1                  | 7.60E-01 | 1                  | 7.60E-01 | 1                  | 5.39E-01 | 1                  | 5.39E-01 |                    |          |                    |          |
| MRPL42       | 12  | 1                  | 7.60E-01 | 1                  | 7.60E-01 | 1                  | 5.39E-01 | 1                  | 5.39E-01 |                    |          |                    |          |
| PHACTR1      | 6   | 1                  | 7.60E-01 | 1                  | 7.60E-01 | 1                  | 5.39E-01 | 1                  | 5.39E-01 |                    |          |                    |          |
| PRSS35       | 6   | 2                  | 6.02E-01 | 2                  | 6.02E-01 | 1                  | 5.39E-01 | 1                  | 5.39E-01 | 1                  | 6.29E-01 | 1                  | 6.29E-01 |
| SNRPD3       | 22  | 1                  | 7.60E-01 | 1                  | 7.60E-01 | 1                  | 5.39E-01 | 1                  | 5.39E-01 |                    |          |                    |          |
| GANC         | 15  | 5                  | 2.80E-02 | 5                  | 2.80E-02 | 4                  | 5.39E-01 | 4                  | 5.39E-01 | 3                  | 5.45E-01 | 3                  | 5.45E-01 |
| MATN3        | 2   | 2                  | 7.89E-01 | 2                  | 7.89E-01 | 2                  | 5.39E-01 | 2                  | 5.39E-01 | 2                  | 7.71E-01 | 2                  | 7.71E-01 |
| GOLGA2       | 9   | 3                  | 1.00E+00 | 4                  | 1.00E+00 | 3                  | 5.39E-01 | 4                  | 6.11E-01 | 3                  | 6.50E-01 | 4                  | 6.84E-01 |
| C9orf64      | 9   | 1                  | 7.57E-01 | 1                  | 7.57E-01 | 1                  | 5.39E-01 | 1                  | 5.39E-01 |                    |          |                    |          |
| PATE1        | 11  | 1                  | 7.57E-01 | 1                  | 7.57E-01 | 1                  | 5.39E-01 | 1                  | 5.39E-01 |                    |          |                    |          |
| OR51B4       | 11  | 2                  | 4.13E-01 | 2                  | 4.13E-01 | 1                  | 5.39E-01 | 1                  | 5.39E-01 | 1                  | 6.58E-01 | 1                  | 6.58E-01 |
| PPP1R7       | 2   | 1                  | 7.57E-01 | 1                  | 7.57E-01 | 1                  | 5.39E-01 | 1                  | 5.39E-01 |                    |          |                    |          |
| MFSD5        | 12  | 1                  | 7.57E-01 | 1                  | 7.57E-01 | 1                  | 5.39E-01 | 1                  | 5.39E-01 |                    |          |                    |          |
| SYNJ2BP      | 14  | 1                  | 7.57E-01 | 1                  | 7.57E-01 | 1                  | 5.39E-01 | 1                  | 5.39E-01 |                    |          |                    |          |
| SYNJ2BP-COX1 | 14  | 1                  | 7.57E-01 | 1                  | 7.57E-01 | 1                  | 5.39E-01 | 1                  | 5.39E-01 |                    |          |                    |          |
| AVPI1        | 10  |                    |          | 1                  | 6.86E-01 |                    |          | 1                  | 5.39E-01 |                    |          | 1                  | 1.00E+00 |
| SESN2        | 1   | 1                  | 7.48E-01 | 1                  | 7.48E-01 | 1                  | 5.40E-01 | 1                  | 5.40E-01 |                    |          |                    |          |
| DOT1L        | 19  | 3                  | 3.29E-01 | 4                  | 8.27E-01 | 3                  | 6.29E-01 | 4                  | 7.63E-01 |                    |          | 1                  | 5.40E-01 |
| AVEN         | 15  | 3                  | 1.00E+00 | 3                  | 1.00E+00 | 3                  | 5.54E-01 | 3                  | 5.54E-01 | 1                  | 5.40E-01 | 1                  | 5.40E-01 |
| MRPS6        | 21  | 1                  | 7.61E-01 | 1                  | 7.61E-01 | 1                  | 5.40E-01 | 1                  | 5.40E-01 |                    |          |                    |          |
| CBLB         | 3   | 3                  | 9.30E-02 | 3                  | 9.30E-02 | 1                  | 5.40E-01 | 1                  | 5.40E-01 | 2                  | 6.22E-01 | 2                  | 6.22E-01 |
| WHSC1        | 4   | 1                  | 7.57E-01 | 1                  | 7.57E-01 | 1                  | 5.41E-01 | 1                  | 5.41E-01 |                    |          |                    |          |
| PKN2         | 1   | 1                  | 7.57E-01 | 1                  | 7.57E-01 | 1                  | 5.41E-01 | 1                  | 5.41E-01 |                    |          |                    |          |
| OLIG1        | 21  | 1                  | 7.57E-01 | 1                  | 7.57E-01 | 1                  | 5.41E-01 | 1                  | 5.41E-01 |                    |          |                    |          |
| MAP3K1       | 5   | 1                  | 7.57E-01 | 1                  | 7.57E-01 | 1                  | 5.41E-01 | 1                  | 5.41E-01 |                    |          |                    |          |
| C2orf82      | 2   | 1                  | 7.57E-01 | 1                  | 7.57E-01 | 1                  | 5.41E-01 | 1                  | 5.41E-01 |                    |          |                    |          |
| FAM83C       | 20  | 2                  | 5.37E-01 | 2                  | 5.37E-01 | 2                  | 5.41E-01 | 2                  | 5.41E-01 | 1                  | 5.82E-01 | 1                  | 5.82E-01 |
| OR4D5        | 11  | 4                  | 6.43E-01 | 4                  | 6.43E-01 | 4                  | 5.42E-01 | 4                  | 5.42E-01 | 1                  | 1.00E+00 | 1                  | 1.00E+00 |
| IGF2         | 11  | 1                  | 6.89E-01 | 1                  | 6.89E-01 | 1                  | 5.42E-01 | 1                  | 5.42E-01 | 1                  | 6.03E-01 | 1                  | 6.03E-01 |
| YIPF1        | 1   | 1                  | 7.46E-01 | 1                  | 7.46E-01 | 1                  | 5.42E-01 | 1                  | 5.42E-01 |                    |          |                    |          |
| THUMPD2      | 2   | 2                  | 3.94E-01 | 2                  | 3.94E-01 | 1                  | 5.42E-01 | 1                  | 5.42E-01 | 1                  | 5.80E-01 | 1                  | 5.80E-01 |
| ANKRD65      | 1   | 1                  | 7.46E-01 | 1                  | 7.46E-01 | 1                  | 5.42E-01 | 1                  | 5.42E-01 |                    |          |                    |          |
| IL7R         | 5   | 6                  | 1.00E+00 | 6                  | 1.00E+00 | 5                  | 5.42E-01 | 5                  | 5.42E-01 | 3                  | 6.91E-01 | 3                  | 6.91E-01 |
| KBTBD11      | 8   | 3                  | 1.21E-01 | 3                  | 1.21E-01 | 1                  | 5.42E-01 | 1                  | 5.42E-01 | 2                  | 6.51E-01 | 2                  | 6.51E-01 |
| ACBD6        | 1   | 1                  | 7.04E-01 | 1                  | 7.04E-01 | 1                  | 5.42E-01 | 1                  | 5.42E-01 | 1                  | 6.06E-01 | 1                  | 6.06E-01 |
| GFRA2        | 8   | 1                  | 7.60E-01 | 2                  | 7.60E-01 | 1                  | 5.42E-01 | 2                  | 5.42E-01 |                    |          | 1                  | 6.16E-01 |
| BPGM         | 7   | 2                  | 3.19E-01 | 2                  | 3.19E-01 | 1                  | 5.42E-01 | 1                  | 5.42E-01 | 1                  | 7.00E-01 | 1                  | 7.00E-01 |
| FABP6        | 5   | 2                  | 4.37E-01 | 2                  | 4.37E-01 | 1                  | 5.42E-01 | 1                  | 5.42E-01 | 1                  | 6.72E-01 | 1                  | 6.72E-01 |
| HRH3         | 20  | 1                  | 7.60E-01 | 1                  | 7.60E-01 | 1                  | 5.42E-01 | 1                  | 5.42E-01 |                    |          |                    |          |
| C11orf40     | 11  |                    |          | 1                  | 1.30E-01 |                    |          | 1                  | 1.00E+00 |                    |          | 1                  | 5.42E-01 |
| ACIN1        | 14  | 4                  | 6.36E-01 | 4                  | 6.36E-01 | 4                  | 8.83E-01 | 4                  | 8.83E-01 | 1                  | 5.42E-01 | 1                  | 5.42E-01 |
| G6PC2        | 2   | 5                  | 1.97E-01 | 5                  | 1.97E-01 | 6                  | 5.42E-01 | 6                  | 5.42E-01 | 4                  | 5.85E-01 | 4                  | 5.85E-01 |
| ATP8A2       | 13  | 5                  | 5.86E-01 | 5                  | 5.86E-01 | 4                  | 5.43E-01 | 4                  | 5.43E-01 | 1                  | 6.28E-01 | 1                  | 6.28E-01 |

| SetID    | Chr | ADEH- vs NA        |          |                    |          | ADEH+ vs ADEH-     |          |                    |          | ADEH+ vs NA        |          |                    |          |
|----------|-----|--------------------|----------|--------------------|----------|--------------------|----------|--------------------|----------|--------------------|----------|--------------------|----------|
|          |     | rare novel         |          | all                |          | rare novel         |          | all                |          | rare novel         |          | all                |          |
|          |     | N variants in test | p-value  | N variants in test | p-value  | N variants in test | p-value  | N variants in test | p-value  | N variants in test | p-value  | N variants in test | p-value  |
| TBC1D10A | 22  | 1                  | 7.61E-01 | 1                  | 7.61E-01 | 1                  | 5.43E-01 | 1                  | 5.43E-01 |                    |          |                    |          |
| CEACAM3  | 19  | 1                  | 7.61E-01 | 1                  | 7.61E-01 | 1                  | 5.43E-01 | 1                  | 5.43E-01 |                    |          |                    |          |
| ARL6IP4  | 12  | 1                  | 7.61E-01 | 1                  | 7.61E-01 | 1                  | 5.43E-01 | 1                  | 5.43E-01 |                    |          |                    |          |
| CREBRF   | 5   | 1                  | 7.61E-01 | 1                  | 7.61E-01 | 1                  | 5.43E-01 | 1                  | 5.43E-01 |                    |          |                    |          |
| SLC10A6  | 4   | 1                  | 7.21E-01 | 1                  | 7.21E-01 | 1                  | 5.43E-01 | 1                  | 5.43E-01 | 1                  | 6.23E-01 | 1                  | 6.23E-01 |
| CTR9     | 11  | 1                  | 7.61E-01 | 1                  | 7.61E-01 | 1                  | 5.43E-01 | 1                  | 5.43E-01 |                    |          |                    |          |
| HOXA1    | 7   | 2                  | 4.40E-01 | 2                  | 4.40E-01 | 1                  | 5.43E-01 | 1                  | 5.43E-01 | 1                  | 6.71E-01 | 1                  | 6.71E-01 |
| OR6F1    | 1   | 1                  | 7.61E-01 | 1                  | 7.61E-01 | 1                  | 5.43E-01 | 1                  | 5.43E-01 |                    |          |                    |          |
| DHRS7C   | 17  | 1                  | 7.61E-01 | 1                  | 7.61E-01 | 1                  | 5.43E-01 | 1                  | 5.43E-01 |                    |          |                    |          |
| ABCG8    | 2   | 6                  | 1.00E+00 | 6                  | 1.00E+00 | 5                  | 5.43E-01 | 5                  | 5.43E-01 | 2                  | 6.06E-01 | 2                  | 6.06E-01 |
| CYHR1    | 8   | 3                  | 6.74E-01 | 3                  | 6.74E-01 | 3                  | 5.43E-01 | 3                  | 5.43E-01 | 1                  | 6.43E-01 | 1                  | 6.43E-01 |
| FIG4     | 6   | 3                  | 2.12E-01 | 3                  | 2.12E-01 | 3                  | 5.43E-01 | 3                  | 5.43E-01 |                    |          |                    |          |
| RNPEP    | 1   | 1                  | 7.52E-01 | 1                  | 7.52E-01 | 1                  | 5.43E-01 | 1                  | 5.43E-01 |                    |          |                    |          |
| FSCN3    | 7   | 2                  | 4.90E-01 | 2                  | 4.90E-01 | 1                  | 5.43E-01 | 1                  | 5.43E-01 | 1                  | 6.05E-01 | 1                  | 6.05E-01 |
| ACVR2B   | 3   | 1                  | 7.52E-01 | 1                  | 7.52E-01 | 1                  | 5.43E-01 | 1                  | 5.43E-01 |                    |          |                    |          |
| SLC25A42 | 19  | 1                  | 7.49E-01 | 1                  | 7.49E-01 | 1                  | 5.43E-01 | 1                  | 5.43E-01 | 1                  | 6.41E-01 | 1                  | 6.41E-01 |
| ZNF506   | 19  | 1                  | 7.52E-01 | 1                  | 7.52E-01 | 1                  | 5.43E-01 | 1                  | 5.43E-01 |                    |          |                    |          |
| FBXL14   | 12  | 1                  | 7.38E-01 | 1                  | 7.38E-01 | 1                  | 5.44E-01 | 1                  | 5.44E-01 |                    |          |                    |          |
| CAMLG    | 5   | 1                  | 7.38E-01 | 1                  | 7.38E-01 | 1                  | 5.44E-01 | 1                  | 5.44E-01 |                    |          |                    |          |
| SESTD1   | 2   | 2                  | 4.55E-01 | 2                  | 4.55E-01 | 1                  | 5.44E-01 | 1                  | 5.44E-01 | 1                  | 6.58E-01 | 1                  | 6.58E-01 |
| TBC1D20  | 20  | 2                  | 4.67E-01 | 2                  | 4.67E-01 | 1                  | 5.44E-01 | 1                  | 5.44E-01 | 1                  | 6.18E-01 | 1                  | 6.18E-01 |
| ALDH3B2  | 11  | 4                  | 1.00E+00 | 4                  | 1.00E+00 | 3                  | 5.44E-01 | 3                  | 5.44E-01 | 2                  | 6.20E-01 | 2                  | 6.20E-01 |
| IL36G    | 2   | 1                  | 7.42E-01 | 1                  | 7.42E-01 | 1                  | 5.44E-01 | 1                  | 5.44E-01 |                    |          |                    |          |
| DES      | 2   | 2                  | 3.49E-01 | 2                  | 3.49E-01 | 1                  | 5.44E-01 | 1                  | 5.44E-01 | 1                  | 6.13E-01 | 1                  | 6.13E-01 |
| TMEM38A  | 19  | 1                  | 7.42E-01 | 1                  | 7.42E-01 | 1                  | 5.44E-01 | 1                  | 5.44E-01 |                    |          |                    |          |
| LIPN     | 10  | 1                  | 7.42E-01 | 1                  | 7.42E-01 | 1                  | 5.44E-01 | 1                  | 5.44E-01 |                    |          |                    |          |
| SERPINB5 | 18  | 1                  | 7.42E-01 | 1                  | 7.42E-01 | 1                  | 5.44E-01 | 1                  | 5.44E-01 |                    |          |                    |          |
| GJB7     | 6   | 3                  | 7.80E-02 | 4                  | 2.66E-01 | 1                  | 5.44E-01 | 2                  | 7.14E-01 | 2                  | 6.28E-01 | 3                  | 1.00E+00 |
| DDR2     | 1   | 3                  | 1.66E-01 | 3                  | 1.66E-01 | 1                  | 5.44E-01 | 1                  | 5.44E-01 | 2                  | 6.47E-01 | 2                  | 6.47E-01 |
| MGMT     | 10  | 2                  | 4.90E-01 | 2                  | 4.90E-01 | 1                  | 5.44E-01 | 1                  | 5.44E-01 | 1                  | 6.35E-01 | 1                  | 6.35E-01 |
| GPR61    | 1   | 1                  | 7.42E-01 | 1                  | 7.42E-01 | 1                  | 5.44E-01 | 1                  | 5.44E-01 |                    |          |                    |          |
| NDEL1    | 17  | 1                  | 7.42E-01 | 1                  | 7.42E-01 | 1                  | 5.44E-01 | 1                  | 5.44E-01 |                    |          |                    |          |
| TLX3     | 5   | 1                  | 7.59E-01 | 1                  | 7.59E-01 | 1                  | 5.44E-01 | 1                  | 5.44E-01 |                    |          |                    |          |
| CXCL2    | 4   | 1                  | 7.58E-01 | 1                  | 7.58E-01 | 1                  | 5.44E-01 | 1                  | 5.44E-01 |                    |          |                    |          |
| GDF5     | 20  | 1                  | 7.58E-01 | 1                  | 7.58E-01 | 1                  | 5.44E-01 | 1                  | 5.44E-01 |                    |          |                    |          |
| AAAS     | 12  | 2                  | 3.27E-01 | 2                  | 3.27E-01 | 1                  | 5.44E-01 | 1                  | 5.44E-01 | 1                  | 6.46E-01 | 1                  | 6.46E-01 |
| ASIC2    | 17  | 1                  | 7.58E-01 | 1                  | 7.58E-01 | 1                  | 5.44E-01 | 1                  | 5.44E-01 |                    |          |                    |          |
| SLC35F2  | 11  | 1                  | 7.58E-01 | 1                  | 7.58E-01 | 1                  | 5.44E-01 | 1                  | 5.44E-01 |                    |          |                    |          |
| TRPC4    | 13  | 1                  | 7.56E-01 | 1                  | 7.56E-01 | 1                  | 5.45E-01 | 1                  | 5.45E-01 |                    |          |                    |          |
| GRM7     | 3   | 3                  | 1.07E-01 | 3                  | 1.07E-01 | 1                  | 5.45E-01 | 1                  | 5.45E-01 | 2                  | 6.46E-01 | 2                  | 6.46E-01 |
| TINF2    | 14  | 1                  | 7.56E-01 | 1                  | 7.56E-01 | 1                  | 5.45E-01 | 1                  | 5.45E-01 |                    |          |                    |          |
| ARHGAP15 | 2   | 2                  | 3.84E-01 | 2                  | 3.84E-01 | 1                  | 5.45E-01 | 1                  | 5.45E-01 | 1                  | 6.46E-01 | 1                  | 6.46E-01 |
| MAP2K7   | 19  | 1                  | 7.56E-01 | 1                  | 7.56E-01 | 1                  | 5.45E-01 | 1                  | 5.45E-01 |                    |          |                    |          |
| RTF1     | 15  | 1                  | 7.56E-01 | 1                  | 7.56E-01 | 1                  | 5.45E-01 | 1                  | 5.45E-01 |                    |          |                    |          |
| TCTN2    | 12  | 1                  | 7.52E-01 | 1                  | 7.52E-01 | 1                  | 5.45E-01 | 1                  | 5.45E-01 |                    |          |                    |          |
| WSCD2    | 12  | 1                  | 7.52E-01 | 1                  | 7.52E-01 | 1                  | 5.45E-01 | 1                  | 5.45E-01 |                    |          |                    |          |
| HS3ST2   | 16  | 1                  | 7.52E-01 | 1                  | 7.52E-01 | 1                  | 5.45E-01 | 1                  | 5.45E-01 |                    |          |                    |          |
| HID1     | 17  | 1                  | 7.52E-01 | 1                  | 7.52E-01 | 1                  | 5.45E-01 | 1                  | 5.45E-01 |                    |          |                    |          |

| SetID     | Chr | ADEH- vs NA        |          |                    |          | ADEH+ vs ADEH-     |          |                    |          | ADEH+ vs NA        |          |                    |          |
|-----------|-----|--------------------|----------|--------------------|----------|--------------------|----------|--------------------|----------|--------------------|----------|--------------------|----------|
|           |     | rare novel         |          | all                |          | rare novel         |          | all                |          | rare novel         |          | all                |          |
|           |     | N variants in test | p-value  | N variants in test | p-value  | N variants in test | p-value  | N variants in test | p-value  | N variants in test | p-value  | N variants in test | p-value  |
| FSTL1     | 3   | 1                  | 7.52E-01 | 1                  | 7.52E-01 | 1                  | 5.45E-01 | 1                  | 5.45E-01 |                    |          |                    |          |
| ZNF829    | 19  | 1                  | 7.52E-01 | 1                  | 7.52E-01 | 1                  | 5.45E-01 | 1                  | 5.45E-01 |                    |          |                    |          |
| ERICH6    | 3   | 3                  | 4.50E-01 | 3                  | 4.50E-01 | 2                  | 5.45E-01 | 2                  | 5.45E-01 | 2                  | 1.00E+00 | 2                  | 1.00E+00 |
| CTLA4     | 2   | 2                  | 5.02E-01 | 2                  | 5.02E-01 | 2                  | 5.45E-01 | 2                  | 5.45E-01 |                    |          |                    |          |
| HDAC4     | 2   | 4                  | 9.01E-01 | 4                  | 9.01E-01 | 3                  | 5.45E-01 | 3                  | 5.45E-01 | 2                  | 6.31E-01 | 2                  | 6.31E-01 |
| DOHH      | 19  | 1                  | 7.61E-01 | 1                  | 7.61E-01 | 1                  | 5.45E-01 | 1                  | 5.45E-01 |                    |          |                    |          |
| RARS2     | 6   | 1                  | 7.61E-01 | 1                  | 7.61E-01 | 1                  | 5.45E-01 | 1                  | 5.45E-01 |                    |          |                    |          |
| CXCR1     | 2   | 2                  | 2.83E-01 | 2                  | 2.83E-01 | 1                  | 5.45E-01 | 1                  | 5.45E-01 | 2                  | 6.53E-01 | 2                  | 6.53E-01 |
| TIMM10B   | 11  | 1                  | 7.45E-01 | 1                  | 7.45E-01 | 1                  | 5.45E-01 | 1                  | 5.45E-01 | 1                  | 6.17E-01 | 1                  | 6.17E-01 |
| TTBK2     | 15  | 11                 | 6.64E-01 | 11                 | 6.64E-01 | 10                 | 6.04E-01 | 10                 | 6.04E-01 | 5                  | 5.45E-01 | 5                  | 5.45E-01 |
| JAKMIP3   | 10  | 4                  | 4.86E-01 | 4                  | 4.86E-01 | 3                  | 5.46E-01 | 3                  | 5.46E-01 | 2                  | 6.43E-01 | 2                  | 6.43E-01 |
| TSHZ3     | 19  | 4                  | 8.98E-01 | 4                  | 8.98E-01 | 3                  | 5.46E-01 | 3                  | 5.46E-01 | 2                  | 6.42E-01 | 2                  | 6.42E-01 |
| SLC25A1   | 22  | 1                  | 7.58E-01 | 1                  | 7.58E-01 | 1                  | 5.46E-01 | 1                  | 5.46E-01 |                    |          |                    |          |
| ADSL      | 22  | 3                  | 1.24E-01 | 3                  | 1.24E-01 | 1                  | 5.46E-01 | 1                  | 5.46E-01 | 2                  | 6.35E-01 | 2                  | 6.35E-01 |
| HIST1H2AB | 6   | 1                  | 7.58E-01 | 1                  | 7.58E-01 | 1                  | 5.46E-01 | 1                  | 5.46E-01 |                    |          |                    |          |
| METTL9    | 16  | 1                  | 7.58E-01 | 1                  | 7.58E-01 | 1                  | 5.46E-01 | 1                  | 5.46E-01 |                    |          |                    |          |
| PRDM5     | 4   | 5                  | 7.96E-01 | 5                  | 7.96E-01 | 4                  | 5.46E-01 | 4                  | 5.46E-01 | 2                  | 6.48E-01 | 2                  | 6.48E-01 |
| GPLD1     | 6   | 4                  | 5.05E-01 | 4                  | 5.05E-01 | 2                  | 5.75E-01 | 2                  | 5.75E-01 | 3                  | 5.46E-01 | 3                  | 5.46E-01 |
| RTKN2     | 10  | 5                  | 4.46E-01 | 5                  | 4.46E-01 | 3                  | 5.47E-01 | 3                  | 5.47E-01 | 2                  | 6.38E-01 | 2                  | 6.38E-01 |
| MTR       | 1   | 4                  | 7.56E-01 | 4                  | 7.56E-01 | 3                  | 7.77E-01 | 3                  | 7.77E-01 | 3                  | 5.47E-01 | 3                  | 5.47E-01 |
| MFSD2B    | 2   | 2                  | 2.01E-01 | 2                  | 2.01E-01 | 2                  | 5.47E-01 | 2                  | 5.47E-01 |                    |          |                    |          |
| EGLN2     | 19  | 2                  | 2.03E-01 | 2                  | 2.03E-01 | 2                  | 5.47E-01 | 2                  | 5.47E-01 |                    |          |                    |          |
| EXOSC7    | 3   | 1                  | 7.54E-01 | 1                  | 7.54E-01 | 1                  | 5.47E-01 | 1                  | 5.47E-01 |                    |          |                    |          |
| NDUFA6    | 22  | 1                  | 7.54E-01 | 1                  | 7.54E-01 | 1                  | 5.47E-01 | 1                  | 5.47E-01 |                    |          |                    |          |
| HACE1     | 6   | 1                  | 7.54E-01 | 1                  | 7.54E-01 | 1                  | 5.47E-01 | 1                  | 5.47E-01 |                    |          |                    |          |
| C19orf35  | 19  | 1                  | 7.54E-01 | 1                  | 7.54E-01 | 1                  | 5.47E-01 | 1                  | 5.47E-01 |                    |          |                    |          |
| CLDN16    | 3   | 1                  | 7.55E-01 | 1                  | 7.55E-01 | 1                  | 5.47E-01 | 1                  | 5.47E-01 |                    |          |                    |          |
| CYSLTR2   | 13  | 1                  | 7.54E-01 | 1                  | 7.54E-01 | 1                  | 5.47E-01 | 1                  | 5.47E-01 |                    |          |                    |          |
| HAX1      | 1   | 1                  | 7.54E-01 | 1                  | 7.54E-01 | 1                  | 5.47E-01 | 1                  | 5.47E-01 |                    |          |                    |          |
| MEF2D     | 1   | 1                  | 7.54E-01 | 1                  | 7.54E-01 | 1                  | 5.47E-01 | 1                  | 5.47E-01 |                    |          |                    |          |
| RABGGTB   | 1   | 1                  | 7.54E-01 | 1                  | 7.54E-01 | 1                  | 5.47E-01 | 1                  | 5.47E-01 |                    |          |                    |          |
| WDR97     | 8   | 3                  | 1.00E+00 | 3                  | 1.00E+00 | 3                  | 5.47E-01 | 3                  | 5.47E-01 | 3                  | 6.21E-01 | 3                  | 6.21E-01 |
| PDLIM7    | 5   | 6                  | 3.53E-01 | 6                  | 3.53E-01 | 4                  | 1.00E+00 | 4                  | 1.00E+00 | 3                  | 5.48E-01 | 3                  | 5.48E-01 |
| KRT80     | 12  | 4                  | 2.57E-01 | 4                  | 2.57E-01 | 2                  | 5.48E-01 | 2                  | 5.48E-01 | 2                  | 6.30E-01 | 2                  | 6.30E-01 |
| MOB1B     | 4   | 1                  | 7.50E-01 | 1                  | 7.50E-01 | 1                  | 5.48E-01 | 1                  | 5.48E-01 |                    |          |                    |          |
| TMEM67    | 8   | 1                  | 7.50E-01 | 1                  | 7.50E-01 | 1                  | 5.48E-01 | 1                  | 5.48E-01 |                    |          |                    |          |
| SLC39A10  | 2   | 2                  | 4.09E-01 | 2                  | 4.09E-01 | 1                  | 5.48E-01 | 1                  | 5.48E-01 | 1                  | 6.07E-01 | 1                  | 6.07E-01 |
| HYAL1     | 3   | 1                  | 7.50E-01 | 1                  | 7.50E-01 | 1                  | 5.48E-01 | 1                  | 5.48E-01 |                    |          |                    |          |
| NOSTRIN   | 2   | 1                  | 7.50E-01 | 1                  | 7.50E-01 | 1                  | 5.48E-01 | 1                  | 5.48E-01 |                    |          |                    |          |
| BTAF1     | 10  | 1                  | 7.50E-01 | 1                  | 7.50E-01 | 1                  | 5.48E-01 | 1                  | 5.48E-01 |                    |          |                    |          |
| TFF1      | 21  | 1                  | 7.50E-01 | 1                  | 7.50E-01 | 1                  | 5.48E-01 | 1                  | 5.48E-01 |                    |          |                    |          |
| ANXA10    | 4   | 2                  | 7.32E-01 | 2                  | 7.32E-01 | 2                  | 5.49E-01 | 2                  | 5.49E-01 | 1                  | 6.46E-01 | 1                  | 6.46E-01 |
| TSPYL6    | 2   | 2                  | 1.00E+00 | 3                  | 1.00E+00 | 2                  | 5.49E-01 | 3                  | 6.08E-01 | 1                  | 7.39E-01 | 2                  | 7.13E-01 |
| NUP205    | 7   | 6                  | 5.95E-01 | 6                  | 5.95E-01 | 5                  | 5.49E-01 | 5                  | 5.49E-01 | 1                  | 5.82E-01 | 1                  | 5.82E-01 |
| RBM27     | 5   | 6                  | 6.20E-01 | 6                  | 6.20E-01 | 5                  | 5.49E-01 | 5                  | 5.49E-01 | 1                  | 6.18E-01 | 1                  | 6.18E-01 |
| MGLL      | 3   | 1                  | 7.63E-02 | 1                  | 7.63E-02 |                    |          |                    |          | 1                  | 5.49E-01 | 1                  | 5.49E-01 |
| ADAD1     | 4   | 1                  | 7.63E-02 | 1                  | 7.63E-02 |                    |          |                    |          | 1                  | 5.49E-01 | 1                  | 5.49E-01 |
| RNF19B    | 1   | 3                  | 6.65E-01 | 3                  | 6.65E-01 | 2                  | 6.26E-01 | 2                  | 6.26E-01 | 1                  | 5.49E-01 | 1                  | 5.49E-01 |

| SetID    | Chr | ADEH- vs NA        |          |                    |          | ADEH+ vs ADEH-     |          |                    |          | ADEH+ vs NA        |          |                    |          |
|----------|-----|--------------------|----------|--------------------|----------|--------------------|----------|--------------------|----------|--------------------|----------|--------------------|----------|
|          |     | rare novel         |          | all                |          | rare novel         |          | all                |          | rare novel         |          | all                |          |
|          |     | N variants in test | p-value  | N variants in test | p-value  | N variants in test | p-value  | N variants in test | p-value  | N variants in test | p-value  | N variants in test | p-value  |
| EVI5     | 1   | 3                  | 6.59E-01 | 3                  | 6.59E-01 | 2                  | 6.27E-01 | 2                  | 6.27E-01 | 1                  | 5.49E-01 | 1                  | 5.49E-01 |
| IQCD     | 12  | 3                  | 5.86E-01 | 3                  | 5.86E-01 | 3                  | 8.58E-01 | 3                  | 8.58E-01 | 1                  | 5.49E-01 | 1                  | 5.49E-01 |
| ZNF331   | 19  | 3                  | 6.54E-01 | 3                  | 6.54E-01 | 2                  | 6.34E-01 | 2                  | 6.34E-01 | 1                  | 5.49E-01 | 1                  | 5.49E-01 |
| MYCBPAP  | 17  | 5                  | 7.73E-01 | 5                  | 7.73E-01 | 5                  | 5.58E-01 | 5                  | 5.58E-01 | 2                  | 5.49E-01 | 2                  | 5.49E-01 |
| ZNF208   | 19  | 2                  | 5.54E-01 | 2                  | 5.54E-01 | 2                  | 5.49E-01 | 2                  | 5.49E-01 | 1                  | 6.28E-01 | 1                  | 6.28E-01 |
| PSEN2    | 1   | 2                  | 5.23E-01 | 2                  | 5.23E-01 | 2                  | 5.49E-01 | 2                  | 5.49E-01 |                    |          |                    |          |
| ARHGAP21 | 10  | 4                  | 1.00E+00 | 4                  | 1.00E+00 | 3                  | 5.49E-01 | 3                  | 5.49E-01 | 2                  | 6.40E-01 | 2                  | 6.40E-01 |
| GYLTL1B  | 11  | 4                  | 1.00E+00 | 4                  | 1.00E+00 | 4                  | 5.50E-01 | 4                  | 5.50E-01 | 2                  | 6.46E-01 | 2                  | 6.46E-01 |
| KALRN    | 3   | 8                  | 8.20E-01 | 8                  | 8.20E-01 | 6                  | 5.50E-01 | 6                  | 5.50E-01 | 5                  | 1.00E+00 | 5                  | 1.00E+00 |
| PHKG1    | 7   | 3                  | 8.13E-01 | 3                  | 8.13E-01 | 2                  | 5.50E-01 | 2                  | 5.50E-01 | 2                  | 6.45E-01 | 2                  | 6.45E-01 |
| PXDNL    | 8   | 14                 | 1.41E-01 | 15                 | 1.50E-01 | 10                 | 7.14E-01 | 11                 | 6.88E-01 | 7                  | 5.50E-01 | 8                  | 6.08E-01 |
| GORAB    | 1   | 1                  | 7.56E-01 | 1                  | 7.56E-01 | 1                  | 5.50E-01 | 1                  | 5.50E-01 |                    |          |                    |          |
| NOP56    | 20  | 1                  | 7.51E-01 | 1                  | 7.51E-01 | 1                  | 5.50E-01 | 1                  | 5.50E-01 |                    |          |                    |          |
| MBD1     | 18  | 1                  | 7.51E-01 | 1                  | 7.51E-01 | 1                  | 5.50E-01 | 1                  | 5.50E-01 |                    |          |                    |          |
| NAGS     | 17  | 1                  | 7.51E-01 | 1                  | 7.51E-01 | 1                  | 5.50E-01 | 1                  | 5.50E-01 |                    |          |                    |          |
| PMP2     | 8   | 1                  | 7.51E-01 | 1                  | 7.51E-01 | 1                  | 5.50E-01 | 1                  | 5.50E-01 |                    |          |                    |          |
| FABP4    | 8   | 1                  | 7.51E-01 | 1                  | 7.51E-01 | 1                  | 5.50E-01 | 1                  | 5.50E-01 |                    |          |                    |          |
| BHLHE41  | 12  | 1                  | 7.51E-01 | 1                  | 7.51E-01 | 1                  | 5.50E-01 | 1                  | 5.50E-01 |                    |          |                    |          |
| TFCP2L1  | 2   | 1                  | 7.55E-01 | 1                  | 7.55E-01 | 1                  | 5.51E-01 | 1                  | 5.51E-01 |                    |          |                    |          |
| FOXRED2  | 22  | 1                  | 7.35E-01 | 1                  | 7.35E-01 | 1                  | 5.51E-01 | 1                  | 5.51E-01 | 1                  | 5.77E-01 | 1                  | 5.77E-01 |
| TNFSF10  | 3   | 1                  | 7.55E-01 | 1                  | 7.55E-01 | 1                  | 5.51E-01 | 1                  | 5.51E-01 |                    |          |                    |          |
| TMEM87A  | 15  | 1                  | 7.55E-01 | 1                  | 7.55E-01 | 1                  | 5.51E-01 | 1                  | 5.51E-01 |                    |          |                    |          |
| TRIM11   | 1   | 1                  | 7.55E-01 | 1                  | 7.55E-01 | 1                  | 5.51E-01 | 1                  | 5.51E-01 |                    |          |                    |          |
| CHADL    | 22  | 1                  | 7.64E-01 | 1                  | 7.64E-01 | 1                  | 5.51E-01 | 1                  | 5.51E-01 |                    |          |                    |          |
| AMN1     | 12  | 1                  | 7.64E-01 | 1                  | 7.64E-01 | 1                  | 5.51E-01 | 1                  | 5.51E-01 |                    |          |                    |          |
| NEK7     | 1   | 1                  | 7.64E-01 | 1                  | 7.64E-01 | 1                  | 5.51E-01 | 1                  | 5.51E-01 |                    |          |                    |          |
| IPO4     | 14  | 2                  | 3.16E-01 | 3                  | 3.16E-01 | 1                  | 5.51E-01 | 2                  | 5.51E-01 | 2                  | 6.19E-01 | 3                  | 6.19E-01 |
| KRT73    | 12  | 1                  | 7.64E-01 | 1                  | 7.64E-01 | 1                  | 5.51E-01 | 1                  | 5.51E-01 |                    |          |                    |          |
| GAS2L1   | 22  | 1                  | 7.64E-01 | 1                  | 7.64E-01 | 1                  | 5.51E-01 | 1                  | 5.51E-01 |                    |          |                    |          |
| VEGFA    | 6   | 2                  | 3.40E-01 | 2                  | 3.40E-01 | 1                  | 5.51E-01 | 1                  | 5.51E-01 | 1                  | 6.45E-01 | 1                  | 6.45E-01 |
| RPIA     | 2   | 1                  | 7.64E-01 | 1                  | 7.64E-01 | 1                  | 5.51E-01 | 1                  | 5.51E-01 |                    |          |                    |          |
| SLC22A12 | 11  | 5                  | 4.34E-01 | 5                  | 4.34E-01 | 3                  | 5.51E-01 | 3                  | 5.51E-01 | 2                  | 6.36E-01 | 2                  | 6.36E-01 |
| RTTN     | 18  | 14                 | 4.80E-02 | 14                 | 4.80E-02 | 9                  | 7.75E-01 | 9                  | 7.75E-01 | 7                  | 5.51E-01 | 7                  | 5.51E-01 |
| ZNF540   | 19  | 3                  | 1.70E-01 | 3                  | 1.70E-01 | 3                  | 5.52E-01 | 3                  | 5.52E-01 |                    |          |                    |          |
| ZHX3     | 20  | 3                  | 7.13E-03 | 3                  | 7.13E-03 |                    |          |                    |          | 3                  | 5.52E-01 | 3                  | 5.52E-01 |
| CENPE    | 4   | 1                  | 7.22E-01 | 1                  | 7.22E-01 | 1                  | 5.52E-01 | 1                  | 5.52E-01 | 1                  | 6.33E-01 | 1                  | 6.33E-01 |
| DPAGT1   | 11  | 1                  | 7.61E-01 | 1                  | 7.61E-01 | 1                  | 5.52E-01 | 1                  | 5.52E-01 |                    |          |                    |          |
| COIL     | 17  | 1                  | 7.61E-01 | 1                  | 7.61E-01 | 1                  | 5.52E-01 | 1                  | 5.52E-01 |                    |          |                    |          |
| OR51S1   | 11  | 2                  | 1.00E+00 | 3                  | 1.00E+00 | 2                  | 6.44E-01 | 3                  | 5.52E-01 | 1                  | 6.56E-01 | 2                  | 6.82E-01 |
| APOBR    | 16  | 4                  | 7.89E-01 | 4                  | 7.89E-01 | 4                  | 5.52E-01 | 4                  | 5.52E-01 | 1                  | 6.04E-01 | 1                  | 6.04E-01 |
| TAP1     | 6   | 4                  | 1.00E+00 | 4                  | 1.00E+00 | 4                  | 5.52E-01 | 4                  | 5.52E-01 | 4                  | 6.21E-01 | 4                  | 6.21E-01 |
| TMEM256  | 17  | 1                  | 7.61E-01 | 1                  | 7.61E-01 | 1                  | 5.53E-01 | 1                  | 5.53E-01 |                    |          |                    |          |
| ACAA1    | 3   | 5                  | 5.93E-01 | 5                  | 5.93E-01 | 5                  | 5.53E-01 | 5                  | 5.53E-01 | 1                  | 6.42E-01 | 1                  | 6.42E-01 |
| HMGCS2   | 1   | 5                  | 6.14E-01 | 5                  | 6.14E-01 | 5                  | 5.54E-01 | 5                  | 5.54E-01 | 1                  | 6.49E-01 | 1                  | 6.49E-01 |
| NMBR     | 6   | 4                  | 6.72E-01 | 5                  | 8.10E-01 | 3                  | 5.54E-01 | 4                  | 6.01E-01 | 4                  | 8.77E-01 | 5                  | 1.00E+00 |
| ADAMTS6  | 5   | 1                  | 9.20E-01 | 1                  | 9.20E-01 | 2                  | 5.54E-01 | 2                  | 5.54E-01 | 2                  | 7.42E-01 | 2                  | 7.42E-01 |
| 10-Mar   | 17  | 4                  | 7.85E-01 | 5                  | 7.85E-01 | 3                  | 5.54E-01 | 4                  | 5.54E-01 | 2                  | 6.60E-01 | 3                  | 6.60E-01 |
| SPATA3   | 2   |                    |          | 1                  | 5.13E-01 |                    |          | 1                  | 8.04E-01 |                    |          | 1                  | 5.54E-01 |

| SetID    | Chr | ADEH- vs NA        |          |                    |          | ADEH+ vs ADEH-     |          |                    |          | ADEH+ vs NA        |          |                    |          |
|----------|-----|--------------------|----------|--------------------|----------|--------------------|----------|--------------------|----------|--------------------|----------|--------------------|----------|
|          |     | rarenovel          |          | all                |          | rarenovel          |          | all                |          | rarenovel          |          | all                |          |
|          |     | N variants in test | p-value  | N variants in test | p-value  | N variants in test | p-value  | N variants in test | p-value  | N variants in test | p-value  | N variants in test | p-value  |
| EXOC3L1  | 16  | 9                  | 2.84E-01 | 9                  | 2.84E-01 | 6                  | 1.00E+00 | 6                  | 1.00E+00 | 7                  | 5.54E-01 | 7                  | 5.54E-01 |
| SCNN1G   | 16  | 1                  | 7.15E-01 | 1                  | 7.15E-01 | 1                  | 5.54E-01 | 1                  | 5.54E-01 | 1                  | 6.64E-01 | 1                  | 6.64E-01 |
| ZSWIM8   | 10  | 1                  | 7.59E-01 | 1                  | 7.59E-01 | 1                  | 5.54E-01 | 1                  | 5.54E-01 |                    |          |                    |          |
| CSRNP1   | 3   | 1                  | 7.59E-01 | 1                  | 7.59E-01 | 1                  | 5.54E-01 | 1                  | 5.54E-01 |                    |          |                    |          |
| NKX1-2   | 10  | 1                  | 7.23E-01 | 1                  | 7.23E-01 | 1                  | 5.54E-01 | 1                  | 5.54E-01 | 1                  | 6.74E-01 | 1                  | 6.74E-01 |
| TKT      | 3   | 3                  | 1.41E-01 | 3                  | 1.41E-01 | 1                  | 5.54E-01 | 1                  | 5.54E-01 | 2                  | 6.40E-01 | 2                  | 6.40E-01 |
| TOP2B    | 3   | 2                  | 3.69E-01 | 2                  | 3.69E-01 | 1                  | 5.54E-01 | 1                  | 5.54E-01 | 1                  | 6.33E-01 | 1                  | 6.33E-01 |
| SP5      | 2   | 1                  | 7.59E-01 | 1                  | 7.59E-01 | 1                  | 5.54E-01 | 1                  | 5.54E-01 |                    |          |                    |          |
| EXOC3L2  | 19  | 4                  | 9.01E-01 | 4                  | 9.01E-01 | 3                  | 5.54E-01 | 3                  | 5.54E-01 | 2                  | 6.39E-01 | 2                  | 6.39E-01 |
| GIPR     | 19  | 3                  | 6.60E-01 | 4                  | 6.57E-01 | 2                  | 6.25E-01 | 3                  | 5.54E-01 | 1                  | 6.28E-01 | 2                  | 6.60E-01 |
| OR2L13   | 1   | 1                  | 2.21E-01 | 1                  | 2.21E-01 | 1                  | 5.55E-01 | 1                  | 5.55E-01 |                    |          |                    |          |
| CYP2C19  | 10  | 1                  | 8.68E-01 | 1                  | 8.68E-01 | 2                  | 5.55E-01 | 2                  | 5.55E-01 | 2                  | 7.07E-01 | 2                  | 7.07E-01 |
| GALNT5   | 2   | 6                  | 5.50E-03 | 6                  | 5.50E-03 | 4                  | 1.00E+00 | 4                  | 1.00E+00 | 4                  | 5.55E-01 | 4                  | 5.55E-01 |
| METTL23  | 17  | 1                  | 7.55E-01 | 1                  | 7.55E-01 | 1                  | 5.55E-01 | 1                  | 5.55E-01 |                    |          |                    |          |
| SMIM7    | 19  | 1                  | 7.02E-01 | 1                  | 7.02E-01 | 1                  | 5.55E-01 | 1                  | 5.55E-01 | 1                  | 6.45E-01 | 1                  | 6.45E-01 |
| OR5L2    | 11  | 1                  | 7.55E-01 | 1                  | 7.55E-01 | 1                  | 5.55E-01 | 1                  | 5.55E-01 |                    |          |                    |          |
| SYT13    | 11  | 1                  | 7.55E-01 | 1                  | 7.55E-01 | 1                  | 5.55E-01 | 1                  | 5.55E-01 |                    |          |                    |          |
| NKX2-1   | 14  | 1                  | 7.64E-01 | 1                  | 7.64E-01 | 1                  | 5.55E-01 | 1                  | 5.55E-01 |                    |          |                    |          |
| KCNS1    | 20  | 2                  | 3.97E-01 | 2                  | 3.97E-01 | 1                  | 5.55E-01 | 1                  | 5.55E-01 | 1                  | 6.29E-01 | 1                  | 6.29E-01 |
| SLC24A2  | 9   | 1                  | 7.64E-01 | 1                  | 7.64E-01 | 1                  | 5.55E-01 | 1                  | 5.55E-01 |                    |          |                    |          |
| KRT23    | 17  | 2                  | 3.12E-01 | 2                  | 3.12E-01 | 1                  | 5.55E-01 | 1                  | 5.55E-01 | 1                  | 6.60E-01 | 1                  | 6.60E-01 |
| SCN3B    | 11  | 1                  | 7.64E-01 | 1                  | 7.64E-01 | 1                  | 5.55E-01 | 1                  | 5.55E-01 |                    |          |                    |          |
| AP1G2    | 14  | 4                  | 6.97E-01 | 5                  | 7.01E-01 | 3                  | 5.56E-01 | 4                  | 8.58E-01 | 2                  | 6.46E-01 | 3                  | 7.27E-01 |
| HACL1    | 3   | 4                  | 2.19E-01 | 5                  | 7.32E-02 | 4                  | 6.04E-01 | 5                  | 5.56E-01 |                    |          | 1                  | 6.89E-01 |
| PGK2     | 6   | 5                  | 3.63E-01 | 5                  | 3.63E-01 | 3                  | 5.56E-01 | 3                  | 5.56E-01 | 3                  | 5.59E-01 | 3                  | 5.59E-01 |
| CD4      | 12  | 2                  | 7.23E-01 | 2                  | 7.23E-01 | 2                  | 5.56E-01 | 2                  | 5.56E-01 | 1                  | 6.12E-01 | 1                  | 6.12E-01 |
| CYP2F1   | 19  | 2                  | 4.41E-01 | 2                  | 4.41E-01 | 1                  | 1.00E+00 | 1                  | 1.00E+00 | 2                  | 5.56E-01 | 2                  | 5.56E-01 |
| QSOX1    | 1   | 3                  | 4.33E-01 | 4                  | 4.35E-01 | 2                  | 5.56E-01 | 3                  | 1.00E+00 | 2                  | 6.43E-01 | 3                  | 7.40E-01 |
| C19orf44 | 19  | 4                  | 5.74E-01 | 4                  | 5.74E-01 | 3                  | 5.57E-01 | 3                  | 5.57E-01 | 1                  | 6.11E-01 | 1                  | 6.11E-01 |
| CXCL8    | 4   | 1                  | 7.88E-01 | 1                  | 7.88E-01 | 1                  | 5.57E-01 | 1                  | 5.57E-01 | 1                  | 6.17E-01 | 1                  | 6.17E-01 |
| SORL1    | 11  | 6                  | 2.36E-01 | 6                  | 2.36E-01 | 3                  | 7.97E-01 | 3                  | 7.97E-01 | 3                  | 5.57E-01 | 3                  | 5.57E-01 |
| OR52B2   | 11  | 2                  | 2.83E-01 | 2                  | 2.83E-01 | 1                  | 5.57E-01 | 1                  | 5.57E-01 | 1                  | 6.03E-01 | 1                  | 6.03E-01 |
| ZNF564   | 19  | 1                  | 7.50E-01 | 1                  | 7.50E-01 | 1                  | 5.57E-01 | 1                  | 5.57E-01 |                    |          |                    |          |
| PDE8B    | 5   | 1                  | 7.50E-01 | 1                  | 7.50E-01 | 1                  | 5.57E-01 | 1                  | 5.57E-01 |                    |          |                    |          |
| DLGAP1   | 18  | 1                  | 7.51E-01 | 1                  | 7.51E-01 | 1                  | 5.57E-01 | 1                  | 5.57E-01 |                    |          |                    |          |
| N4BP2L2  | 13  | 1                  | 7.51E-01 | 1                  | 7.51E-01 | 1                  | 5.57E-01 | 1                  | 5.57E-01 |                    |          |                    |          |
| GNLY     | 2   | 1                  | 7.51E-01 | 1                  | 7.51E-01 | 1                  | 5.57E-01 | 1                  | 5.57E-01 |                    |          |                    |          |
| CHST12   | 7   | 1                  | 7.51E-01 | 1                  | 7.51E-01 | 1                  | 5.57E-01 | 1                  | 5.57E-01 |                    |          |                    |          |
| KCTD3    | 1   | 1                  | 7.51E-01 | 1                  | 7.51E-01 | 1                  | 5.57E-01 | 1                  | 5.57E-01 |                    |          |                    |          |
| CYTH4    | 22  | 3                  | 1.16E-01 | 3                  | 1.16E-01 | 1                  | 5.57E-01 | 1                  | 5.57E-01 | 2                  | 6.34E-01 | 2                  | 6.34E-01 |
| EID3     | 12  | 2                  | 5.78E-01 | 2                  | 5.78E-01 | 1                  | 5.57E-01 | 1                  | 5.57E-01 | 1                  | 5.67E-01 | 1                  | 5.67E-01 |
| CXCL9    | 4   | 1                  | 7.51E-01 | 1                  | 7.51E-01 | 1                  | 5.57E-01 | 1                  | 5.57E-01 |                    |          |                    |          |
| MAEA     | 4   | 1                  | 7.51E-01 | 1                  | 7.51E-01 | 1                  | 5.57E-01 | 1                  | 5.57E-01 |                    |          |                    |          |
| RXRG     | 1   | 1                  | 7.51E-01 | 1                  | 7.51E-01 | 1                  | 5.57E-01 | 1                  | 5.57E-01 |                    |          |                    |          |
| LILRB4   | 19  | 2                  | 6.93E-01 | 2                  | 6.93E-01 | 2                  | 5.57E-01 | 2                  | 5.57E-01 | 1                  | 6.08E-01 | 1                  | 6.08E-01 |
| CTTNBP2  | 7   | 6                  | 5.31E-01 | 6                  | 5.31E-01 | 4                  | 7.58E-01 | 4                  | 7.58E-01 | 5                  | 5.57E-01 | 5                  | 5.57E-01 |
| CHEK2    | 22  | 3                  | 5.27E-01 | 3                  | 5.27E-01 | 3                  | 5.57E-01 | 3                  | 5.57E-01 | 1                  | 5.98E-01 | 1                  | 5.98E-01 |
| VN1R2    | 19  | 3                  | 6.65E-01 | 3                  | 6.65E-01 | 3                  | 6.87E-01 | 3                  | 6.87E-01 | 2                  | 5.57E-01 | 2                  | 5.57E-01 |



| SetID    | Chr | ADEH- vs NA        |          |                    |          | ADEH+ vs ADEH-     |          |                    |          | ADEH+ vs NA        |          |                    |          |
|----------|-----|--------------------|----------|--------------------|----------|--------------------|----------|--------------------|----------|--------------------|----------|--------------------|----------|
|          |     | rarenovel          |          | all                |          | rarenovel          |          | all                |          | rarenovel          |          | all                |          |
|          |     | N variants in test | p-value  | N variants in test | p-value  | N variants in test | p-value  | N variants in test | p-value  | N variants in test | p-value  | N variants in test | p-value  |
| KIT      | 4   | 4                  | 5.97E-01 | 4                  | 5.97E-01 | 3                  | 5.58E-01 | 3                  | 5.58E-01 | 1                  | 6.01E-01 | 1                  | 6.01E-01 |
| FBP2     | 9   | 4                  | 8.38E-01 | 4                  | 8.38E-01 | 4                  | 5.58E-01 | 4                  | 5.58E-01 | 2                  | 5.92E-01 | 2                  | 5.92E-01 |
| ANKLE2   | 12  | 5                  | 1.78E-01 | 5                  | 1.78E-01 | 5                  | 5.58E-01 | 5                  | 5.58E-01 |                    |          |                    |          |
| SEC14L5  | 16  | 3                  | 2.17E-01 | 3                  | 2.17E-01 | 3                  | 5.58E-01 | 3                  | 5.58E-01 |                    |          |                    |          |
| MUC4     | 3   | 7                  | 2.45E-01 | 7                  | 2.45E-01 | 6                  | 1.00E+00 | 6                  | 1.00E+00 | 3                  | 5.58E-01 | 3                  | 5.58E-01 |
| PNLIPRP1 | 10  | 4                  | 2.15E-01 | 4                  | 2.15E-01 | 4                  | 5.58E-01 | 4                  | 5.58E-01 |                    |          |                    |          |
| ZNF329   | 19  | 1                  | 7.13E-01 | 1                  | 7.13E-01 | 1                  | 5.58E-01 | 1                  | 5.58E-01 | 1                  | 6.30E-01 | 1                  | 6.30E-01 |
| MXD4     | 4   | 1                  | 7.47E-01 | 1                  | 7.47E-01 | 1                  | 5.58E-01 | 1                  | 5.58E-01 |                    |          |                    |          |
| LPCAT3   | 12  | 1                  | 7.47E-01 | 1                  | 7.47E-01 | 1                  | 5.58E-01 | 1                  | 5.58E-01 |                    |          |                    |          |
| REP15    | 12  | 1                  | 7.07E-01 | 1                  | 7.07E-01 | 1                  | 5.58E-01 | 1                  | 5.58E-01 | 1                  | 7.02E-01 | 1                  | 7.02E-01 |
| ZNF548   | 19  | 1                  | 7.61E-01 | 1                  | 7.61E-01 | 1                  | 5.58E-01 | 1                  | 5.58E-01 |                    |          |                    |          |
| LIPT2    | 11  | 1                  | 7.61E-01 | 1                  | 7.61E-01 | 1                  | 5.58E-01 | 1                  | 5.58E-01 |                    |          |                    |          |
| STARD4   | 5   | 1                  | 7.61E-01 | 1                  | 7.61E-01 | 1                  | 5.58E-01 | 1                  | 5.58E-01 |                    |          |                    |          |
| RNF32    | 7   | 2                  | 2.89E-01 | 2                  | 2.89E-01 | 1                  | 5.58E-01 | 1                  | 5.58E-01 | 1                  | 6.89E-01 | 1                  | 6.89E-01 |
| CSF3     | 17  | 1                  | 7.61E-01 | 1                  | 7.61E-01 | 1                  | 5.58E-01 | 1                  | 5.58E-01 |                    |          |                    |          |
| ABHD16B  | 20  | 1                  | 7.61E-01 | 2                  | 1.00E+00 | 1                  | 5.58E-01 | 2                  | 8.86E-01 |                    |          | 1                  | 1.00E+00 |
| DHPS     | 19  | 3                  | 2.93E-01 | 3                  | 2.93E-01 | 3                  | 5.58E-01 | 3                  | 5.58E-01 |                    |          |                    |          |
| KDM7A    | 7   | 3                  | 6.65E-01 | 3                  | 6.65E-01 | 2                  | 5.58E-01 | 2                  | 5.58E-01 | 1                  | 6.29E-01 | 1                  | 6.29E-01 |
| ATP1A4   | 1   | 14                 | 1.07E-01 | 14                 | 1.07E-01 | 13                 | 5.85E-01 | 13                 | 5.85E-01 | 5                  | 5.59E-01 | 5                  | 5.59E-01 |
| TBKBP1   | 17  | 2                  | 8.68E-01 | 3                  | 1.00E+00 | 2                  | 6.08E-01 | 3                  | 5.59E-01 | 2                  | 6.42E-01 | 3                  | 9.26E-01 |
| ZNF574   | 19  | 2                  | 5.85E-01 | 2                  | 5.85E-01 | 2                  | 5.59E-01 | 2                  | 5.59E-01 |                    |          |                    |          |
| KNG1     | 3   | 4                  | 5.26E-01 | 4                  | 5.26E-01 | 3                  | 1.00E+00 | 3                  | 1.00E+00 | 2                  | 5.59E-01 | 2                  | 5.59E-01 |
| ASCL3    | 11  | 2                  | 5.36E-01 | 2                  | 5.36E-01 | 2                  | 5.59E-01 | 2                  | 5.59E-01 |                    |          |                    |          |
| ADGRF4   | 6   | 3                  | 6.83E-01 | 3                  | 6.83E-01 | 2                  | 5.59E-01 | 2                  | 5.59E-01 | 1                  | 6.41E-01 | 1                  | 6.41E-01 |
| CCDC186  | 10  | 3                  | 2.20E-01 | 3                  | 2.20E-01 | 3                  | 5.59E-01 | 3                  | 5.59E-01 |                    |          |                    |          |
| LRRC18   | 10  | 3                  | 2.19E-01 | 4                  | 3.60E-01 | 3                  | 5.59E-01 | 4                  | 6.59E-01 |                    |          | 1                  | 1.00E+00 |
| CCDC141  | 2   | 5                  | 6.16E-02 | 6                  | 7.41E-02 | 5                  | 6.12E-01 | 6                  | 6.94E-01 | 3                  | 5.60E-01 | 4                  | 6.92E-01 |
| CPEB3    | 10  | 2                  | 5.68E-01 | 2                  | 5.68E-01 | 2                  | 5.60E-01 | 2                  | 5.60E-01 |                    |          |                    |          |
| CCDC78   | 16  | 3                  | 6.19E-01 | 3                  | 6.19E-01 | 2                  | 5.60E-01 | 2                  | 5.60E-01 | 1                  | 6.17E-01 | 1                  | 6.17E-01 |
| DSEL     | 18  | 5                  | 8.37E-01 | 5                  | 8.37E-01 | 4                  | 5.60E-01 | 4                  | 5.60E-01 | 2                  | 7.97E-01 | 2                  | 7.97E-01 |
| SOSTDC1  | 7   | 1                  | 7.63E-01 | 1                  | 7.63E-01 | 1                  | 5.60E-01 | 1                  | 5.60E-01 |                    |          |                    |          |
| ACOT4    | 14  | 1                  | 7.28E-01 | 1                  | 7.28E-01 | 1                  | 5.60E-01 | 1                  | 5.60E-01 | 1                  | 6.37E-01 | 1                  | 6.37E-01 |
| AURKAIP1 | 1   | 1                  | 7.63E-01 | 1                  | 7.63E-01 | 1                  | 5.60E-01 | 1                  | 5.60E-01 |                    |          |                    |          |
| ACOT13   | 6   | 1                  | 7.63E-01 | 1                  | 7.63E-01 | 1                  | 5.60E-01 | 1                  | 5.60E-01 |                    |          |                    |          |
| PMCH     | 12  | 1                  | 7.63E-01 | 1                  | 7.63E-01 | 1                  | 5.60E-01 | 1                  | 5.60E-01 |                    |          |                    |          |
| C10orf12 | 10  | 2                  | 4.81E-01 | 2                  | 4.81E-01 | 1                  | 5.60E-01 | 1                  | 5.60E-01 | 1                  | 6.40E-01 | 1                  | 6.40E-01 |
| PCOLCE   | 7   | 1                  | 7.13E-01 | 1                  | 7.13E-01 | 1                  | 5.60E-01 | 1                  | 5.60E-01 | 1                  | 6.30E-01 | 1                  | 6.30E-01 |
| DYNC111  | 7   | 1                  | 7.43E-01 | 1                  | 7.43E-01 | 1                  | 5.60E-01 | 1                  | 5.60E-01 |                    |          |                    |          |
| KRT38    | 17  | 1                  | 7.43E-01 | 1                  | 7.43E-01 | 1                  | 5.60E-01 | 1                  | 5.60E-01 |                    |          |                    |          |
| GPR45    | 2   | 2                  | 3.99E-01 | 3                  | 3.83E-01 | 1                  | 5.60E-01 | 2                  | 6.49E-01 | 1                  | 6.64E-01 | 2                  | 7.60E-01 |
| PROKR1   | 2   | 2                  | 5.62E-01 | 2                  | 5.62E-01 | 2                  | 5.61E-01 | 2                  | 5.61E-01 |                    |          |                    |          |
| ARHGAP28 | 18  | 2                  | 2.31E-01 | 2                  | 2.31E-01 | 2                  | 5.61E-01 | 2                  | 5.61E-01 |                    |          |                    |          |
| UGT3A1   | 5   | 1                  | 7.97E-02 | 2                  | 1.19E-01 |                    |          | 1                  | 5.61E-01 | 1                  | 7.02E-01 | 2                  | 7.32E-01 |
| TICAM1   | 19  | 4                  | 7.53E-01 | 4                  | 7.53E-01 | 3                  | 5.61E-01 | 3                  | 5.61E-01 | 2                  | 6.47E-01 | 2                  | 6.47E-01 |
| RAD9A    | 11  | 4                  | 8.14E-01 | 4                  | 8.14E-01 | 3                  | 5.61E-01 | 3                  | 5.61E-01 | 1                  | 6.29E-01 | 1                  | 6.29E-01 |
| GNRH2    | 20  | 3                  | 3.12E-01 | 3                  | 3.12E-01 | 3                  | 5.61E-01 | 3                  | 5.61E-01 |                    |          |                    |          |
| OSBP2    | 22  | 3                  | 7.41E-01 | 3                  | 7.41E-01 | 3                  | 5.61E-01 | 3                  | 5.61E-01 | 1                  | 6.56E-01 | 1                  | 6.56E-01 |
| LYPD6B   | 2   | 3                  | 7.17E-01 | 3                  | 7.17E-01 | 2                  | 5.61E-01 | 2                  | 5.61E-01 | 1                  | 5.77E-01 | 1                  | 5.77E-01 |

| SetID    | Chr | ADEH- vs NA        |          |                    |          | ADEH+ vs ADEH-     |          |                    |          | ADEH+ vs NA        |          |                    |          |
|----------|-----|--------------------|----------|--------------------|----------|--------------------|----------|--------------------|----------|--------------------|----------|--------------------|----------|
|          |     | rarenovel          |          | all                |          | rarenovel          |          | all                |          | rarenovel          |          | all                |          |
|          |     | N variants in test | p-value  | N variants in test | p-value  | N variants in test | p-value  | N variants in test | p-value  | N variants in test | p-value  | N variants in test | p-value  |
| PRR35    | 16  | 3                  | 5.31E-02 | 3                  | 5.31E-02 | 3                  | 5.61E-01 | 3                  | 5.61E-01 | 1                  | 1.00E+00 | 1                  | 1.00E+00 |
| BSCL2    | 11  | 2                  | 8.91E-01 | 2                  | 8.91E-01 | 2                  | 5.61E-01 | 2                  | 5.61E-01 | 1                  | 6.15E-01 | 1                  | 6.15E-01 |
| ENPEP    | 4   | 4                  | 1.57E-01 | 4                  | 1.57E-01 | 3                  | 5.62E-01 | 3                  | 5.62E-01 | 2                  | 1.00E+00 | 2                  | 1.00E+00 |
| CC2D1B   | 1   | 3                  | 3.70E-01 | 3                  | 3.70E-01 | 3                  | 5.62E-01 | 3                  | 5.62E-01 |                    |          |                    |          |
| ABLIM1   | 10  | 3                  | 7.63E-01 | 3                  | 7.63E-01 | 2                  | 5.62E-01 | 2                  | 5.62E-01 | 1                  | 6.34E-01 | 1                  | 6.34E-01 |
| OPN1SW   | 7   | 4                  | 6.52E-01 | 4                  | 6.52E-01 | 3                  | 5.62E-01 | 3                  | 5.62E-01 | 1                  | 6.31E-01 | 1                  | 6.31E-01 |
| VIPAS39  | 14  | 2                  | 1.99E-01 | 2                  | 1.99E-01 | 2                  | 5.62E-01 | 2                  | 5.62E-01 |                    |          |                    |          |
| NPSR1    | 7   | 1                  | 5.65E-01 | 2                  | 5.65E-01 | 1                  | 1.00E+00 | 2                  | 1.00E+00 | 1                  | 5.62E-01 | 2                  | 5.62E-01 |
| CCDC116  | 22  | 7                  | 3.90E-01 | 8                  | 3.90E-01 | 6                  | 5.62E-01 | 7                  | 5.62E-01 | 6                  | 8.84E-01 | 7                  | 8.85E-01 |
| NUP214   | 9   | 5                  | 7.86E-01 | 5                  | 7.86E-01 | 4                  | 5.62E-01 | 4                  | 5.62E-01 | 1                  | 6.06E-01 | 1                  | 6.06E-01 |
| CCDC8    | 19  | 3                  | 7.11E-01 | 3                  | 7.11E-01 | 2                  | 5.62E-01 | 2                  | 5.62E-01 | 1                  | 6.30E-01 | 1                  | 6.30E-01 |
| CDR2L    | 17  | 2                  | 5.72E-01 | 2                  | 5.72E-01 | 2                  | 5.63E-01 | 2                  | 5.63E-01 |                    |          |                    |          |
| ZNF18    | 17  | 1                  | 6.59E-02 | 1                  | 6.59E-02 |                    |          |                    |          | 1                  | 5.63E-01 | 1                  | 5.63E-01 |
| BAIAP2L1 | 7   | 1                  | 6.59E-02 | 1                  | 6.59E-02 |                    |          |                    |          | 1                  | 5.63E-01 | 1                  | 5.63E-01 |
| SKAP1    | 17  | 1                  | 6.59E-02 | 1                  | 6.59E-02 |                    |          |                    |          | 1                  | 5.63E-01 | 1                  | 5.63E-01 |
| PAQR8    | 6   | 1                  | 6.59E-02 | 1                  | 6.59E-02 |                    |          |                    |          | 1                  | 5.63E-01 | 1                  | 5.63E-01 |
| UBXN2B   | 8   | 1                  | 6.59E-02 | 1                  | 6.59E-02 |                    |          |                    |          | 1                  | 5.63E-01 | 1                  | 5.63E-01 |
| NHSL1    | 6   | 5                  | 1.00E+00 | 5                  | 1.00E+00 | 4                  | 5.63E-01 | 4                  | 5.63E-01 | 4                  | 5.65E-01 | 4                  | 5.65E-01 |
| XAB2     | 19  | 3                  | 7.63E-01 | 3                  | 7.63E-01 | 3                  | 5.63E-01 | 3                  | 5.63E-01 | 1                  | 6.81E-01 | 1                  | 6.81E-01 |
| ZNF805   | 19  | 4                  | 3.50E-01 | 4                  | 3.50E-01 | 2                  | 5.63E-01 | 2                  | 5.63E-01 | 2                  | 6.41E-01 | 2                  | 6.41E-01 |
| KIAA1522 | 1   | 5                  | 7.66E-01 | 5                  | 7.66E-01 | 4                  | 5.64E-01 | 4                  | 5.64E-01 | 1                  | 6.58E-01 | 1                  | 6.58E-01 |
| PAPD7    | 5   | 1                  | 7.39E-01 | 1                  | 7.39E-01 | 1                  | 5.64E-01 | 1                  | 5.64E-01 |                    |          |                    |          |
| ZNF507   | 19  | 1                  | 6.57E-01 | 1                  | 6.57E-01 | 1                  | 5.64E-01 | 1                  | 5.64E-01 | 1                  | 6.03E-01 | 1                  | 6.03E-01 |
| SOWAHC   | 2   | 1                  | 7.39E-01 | 1                  | 7.39E-01 | 1                  | 5.64E-01 | 1                  | 5.64E-01 |                    |          |                    |          |
| TRPM8    | 2   | 2                  | 4.60E-01 | 2                  | 4.60E-01 | 1                  | 5.64E-01 | 1                  | 5.64E-01 | 1                  | 6.65E-01 | 1                  | 6.65E-01 |
| EXOC7    | 17  | 2                  | 2.75E-01 | 2                  | 2.75E-01 | 1                  | 5.64E-01 | 1                  | 5.64E-01 | 2                  | 6.35E-01 | 2                  | 6.35E-01 |
| TFIP11   | 22  | 2                  | 3.61E-01 | 2                  | 3.61E-01 | 1                  | 5.64E-01 | 1                  | 5.64E-01 | 1                  | 6.25E-01 | 1                  | 6.25E-01 |
| CIC      | 19  | 6                  | 5.61E-01 | 6                  | 5.61E-01 | 4                  | 5.64E-01 | 4                  | 5.64E-01 | 2                  | 6.40E-01 | 2                  | 6.40E-01 |
| BOD1L1   | 4   | 12                 | 7.26E-01 | 12                 | 7.26E-01 | 10                 | 6.64E-01 | 10                 | 6.64E-01 | 6                  | 5.64E-01 | 6                  | 5.64E-01 |
| SLC25A17 | 22  | 3                  | 8.75E-01 | 3                  | 8.75E-01 | 3                  | 5.65E-01 | 3                  | 5.65E-01 | 1                  | 6.06E-01 | 1                  | 6.06E-01 |
| CARD19   | 9   | 3                  | 2.88E-01 | 3                  | 2.88E-01 | 2                  | 5.65E-01 | 2                  | 5.65E-01 | 1                  | 6.46E-01 | 1                  | 6.46E-01 |
| DIO2     | 14  | 1                  | 2.19E-01 | 1                  | 2.19E-01 | 1                  | 5.65E-01 | 1                  | 5.65E-01 |                    |          |                    |          |
| TTC38    | 22  | 6                  | 7.88E-01 | 6                  | 7.88E-01 | 5                  | 5.65E-01 | 5                  | 5.65E-01 | 5                  | 1.00E+00 | 5                  | 1.00E+00 |
| NSD1     | 5   | 6                  | 6.45E-01 | 7                  | 6.53E-01 | 4                  | 5.65E-01 | 5                  | 7.25E-01 | 2                  | 6.40E-01 | 3                  | 8.62E-01 |
| EEF1D    | 8   | 2                  | 5.25E-01 | 2                  | 5.25E-01 | 2                  | 5.65E-01 | 2                  | 5.65E-01 | 1                  | 6.30E-01 | 1                  | 6.30E-01 |
| XPC      | 3   | 4                  | 6.12E-01 | 4                  | 6.12E-01 | 3                  | 5.65E-01 | 3                  | 5.65E-01 | 1                  | 5.81E-01 | 1                  | 5.81E-01 |
| SLC9A3   | 5   | 4                  | 6.08E-01 | 4                  | 6.08E-01 | 3                  | 5.65E-01 | 3                  | 5.65E-01 | 1                  | 6.01E-01 | 1                  | 6.01E-01 |
| PTGFRN   | 1   | 3                  | 7.04E-01 | 3                  | 7.04E-01 | 2                  | 5.65E-01 | 2                  | 5.65E-01 | 1                  | 6.13E-01 | 1                  | 6.13E-01 |
| DENND5A  | 11  | 2                  | 5.74E-01 | 2                  | 5.74E-01 | 2                  | 5.65E-01 | 2                  | 5.65E-01 |                    |          |                    |          |
| USP47    | 11  | 3                  | 6.22E-01 | 3                  | 6.22E-01 | 2                  | 5.65E-01 | 2                  | 5.65E-01 | 1                  | 6.47E-01 | 1                  | 6.47E-01 |
| ZNF225   | 19  | 6                  | 7.98E-01 | 6                  | 7.98E-01 | 6                  | 6.28E-01 | 6                  | 6.28E-01 | 1                  | 5.65E-01 | 1                  | 5.65E-01 |
| MTERF4   | 2   | 1                  | 8.44E-02 | 2                  | 6.48E-01 |                    |          | 1                  | 5.65E-01 | 1                  | 6.47E-01 | 2                  | 5.90E-01 |
| DNAJC22  | 12  | 1                  | 6.17E-01 | 1                  | 6.17E-01 | 2                  | 1.00E+00 | 2                  | 1.00E+00 | 2                  | 5.65E-01 | 2                  | 5.65E-01 |
| LDHC     | 11  | 4                  | 7.19E-01 | 4                  | 7.19E-01 | 4                  | 5.66E-01 | 4                  | 5.66E-01 | 1                  | 6.29E-01 | 1                  | 6.29E-01 |
| LAMC1    | 1   | 4                  | 6.21E-01 | 4                  | 6.21E-01 | 3                  | 5.66E-01 | 3                  | 5.66E-01 | 1                  | 6.23E-01 | 1                  | 6.23E-01 |
| GBP3     | 1   | 1                  | 6.94E-02 | 3                  | 3.90E-02 |                    |          | 2                  | 5.66E-01 | 1                  | 6.37E-01 | 3                  | 6.56E-01 |
| TANC2    | 17  | 4                  | 2.35E-01 | 4                  | 2.35E-01 | 4                  | 5.66E-01 | 4                  | 5.66E-01 |                    |          |                    |          |
| CCDC110  | 4   | 3                  | 4.88E-01 | 3                  | 4.88E-01 | 2                  | 5.66E-01 | 2                  | 5.66E-01 | 1                  | 6.46E-01 | 1                  | 6.46E-01 |

| SetID    | Chr | ADEH- vs NA        |          |                    |          | ADEH+ vs ADEH-     |          |                    |          | ADEH+ vs NA        |          |                    |          |
|----------|-----|--------------------|----------|--------------------|----------|--------------------|----------|--------------------|----------|--------------------|----------|--------------------|----------|
|          |     | rarenovel          |          | all                |          | rarenovel          |          | all                |          | rarenovel          |          | all                |          |
|          |     | N variants in test | p-value  | N variants in test | p-value  | N variants in test | p-value  | N variants in test | p-value  | N variants in test | p-value  | N variants in test | p-value  |
| DYNAP    | 18  | 1                  | 7.53E-01 | 1                  | 7.53E-01 | 1                  | 5.66E-01 | 1                  | 5.66E-01 |                    |          |                    |          |
| C15orf41 | 15  | 1                  | 7.53E-01 | 1                  | 7.53E-01 | 1                  | 5.66E-01 | 1                  | 5.66E-01 |                    |          |                    |          |
| BRSK1    | 19  | 1                  | 7.53E-01 | 1                  | 7.53E-01 | 1                  | 5.66E-01 | 1                  | 5.66E-01 |                    |          |                    |          |
| WNT6     | 2   | 2                  | 3.74E-01 | 2                  | 3.74E-01 | 1                  | 5.66E-01 | 1                  | 5.66E-01 | 1                  | 6.25E-01 | 1                  | 6.25E-01 |
| TLX2     | 2   | 1                  | 7.53E-01 | 1                  | 7.53E-01 | 1                  | 5.66E-01 | 1                  | 5.66E-01 |                    |          |                    |          |
| USP50    | 15  | 1                  | 7.53E-01 | 1                  | 7.53E-01 | 1                  | 5.66E-01 | 1                  | 5.66E-01 |                    |          |                    |          |
| ZNF648   | 1   | 2                  | 3.19E-01 | 2                  | 3.19E-01 | 2                  | 5.66E-01 | 2                  | 5.66E-01 |                    |          |                    |          |
| SRMS     | 20  | 8                  | 8.16E-01 | 8                  | 8.16E-01 | 7                  | 7.65E-01 | 7                  | 7.65E-01 | 5                  | 5.66E-01 | 5                  | 5.66E-01 |
| TMEM50A  | 1   | 2                  | 5.74E-01 | 2                  | 5.74E-01 | 2                  | 5.66E-01 | 2                  | 5.66E-01 |                    |          |                    |          |
| NFKB1    | 4   | 4                  | 6.02E-01 | 4                  | 6.02E-01 | 3                  | 5.66E-01 | 3                  | 5.66E-01 | 1                  | 6.57E-01 | 1                  | 6.57E-01 |
| BSN      | 3   | 15                 | 3.76E-01 | 15                 | 3.76E-01 | 13                 | 6.64E-01 | 13                 | 6.64E-01 | 9                  | 5.66E-01 | 9                  | 5.66E-01 |
| IL27RA   | 19  | 2                  | 6.21E-01 | 2                  | 6.21E-01 | 2                  | 5.67E-01 | 2                  | 5.67E-01 | 1                  | 1.00E+00 | 1                  | 1.00E+00 |
| SCAF11   | 12  | 3                  | 8.38E-01 | 3                  | 8.38E-01 | 2                  | 5.67E-01 | 2                  | 5.67E-01 | 2                  | 6.48E-01 | 2                  | 6.48E-01 |
| RBM5     | 3   | 2                  | 5.65E-01 | 2                  | 5.65E-01 | 2                  | 5.67E-01 | 2                  | 5.67E-01 |                    |          |                    |          |
| NAALADL1 | 11  | 3                  | 3.10E-01 | 3                  | 3.10E-01 | 3                  | 5.67E-01 | 3                  | 5.67E-01 |                    |          |                    |          |
| IP6K1    | 3   | 1                  | 1.15E-01 | 1                  | 1.15E-01 |                    |          |                    |          | 1                  | 5.67E-01 | 1                  | 5.67E-01 |
| KDM4D    | 11  | 1                  | 1.15E-01 | 1                  | 1.15E-01 |                    |          |                    |          | 1                  | 5.67E-01 | 1                  | 5.67E-01 |
| TNFSF4   | 1   | 1                  | 1.15E-01 | 1                  | 1.15E-01 |                    |          |                    |          | 1                  | 5.67E-01 | 1                  | 5.67E-01 |
| PPIE     | 1   | 1                  | 1.15E-01 | 1                  | 1.15E-01 |                    |          |                    |          | 1                  | 5.67E-01 | 1                  | 5.67E-01 |
| GABRR1   | 6   | 1                  | 1.15E-01 | 1                  | 1.15E-01 |                    |          |                    |          | 1                  | 5.67E-01 | 1                  | 5.67E-01 |
| F3       | 1   | 1                  | 1.15E-01 | 1                  | 1.15E-01 |                    |          |                    |          | 1                  | 5.67E-01 | 1                  | 5.67E-01 |
| WEE2     | 7   | 1                  | 1.15E-01 | 1                  | 1.15E-01 |                    |          |                    |          | 1                  | 5.67E-01 | 1                  | 5.67E-01 |
| CASKIN2  | 17  | 5                  | 6.99E-01 | 5                  | 6.99E-01 | 4                  | 5.80E-01 | 4                  | 5.80E-01 | 1                  | 5.67E-01 | 1                  | 5.67E-01 |
| TBX21    | 17  | 1                  | 6.98E-01 | 1                  | 6.98E-01 | 1                  | 5.67E-01 | 1                  | 5.67E-01 | 1                  | 7.00E-01 | 1                  | 7.00E-01 |
| PDK4     | 7   | 1                  | 7.58E-01 | 1                  | 7.58E-01 | 1                  | 5.67E-01 | 1                  | 5.67E-01 |                    |          |                    |          |
| SYT12    | 11  | 1                  | 7.58E-01 | 1                  | 7.58E-01 | 1                  | 5.67E-01 | 1                  | 5.67E-01 |                    |          |                    |          |
| CCL11    | 17  | 1                  | 7.58E-01 | 1                  | 7.58E-01 | 1                  | 5.67E-01 | 1                  | 5.67E-01 |                    |          |                    |          |
| PRG2     | 11  | 2                  | 5.85E-01 | 2                  | 5.85E-01 | 1                  | 5.67E-01 | 1                  | 5.67E-01 | 1                  | 6.29E-01 | 1                  | 6.29E-01 |
| GFOD2    | 16  | 2                  | 3.88E-01 | 2                  | 3.88E-01 | 1                  | 5.67E-01 | 1                  | 5.67E-01 | 1                  | 6.51E-01 | 1                  | 6.51E-01 |
| MPND     | 19  | 2                  | 5.12E-01 | 2                  | 5.12E-01 | 2                  | 1.00E+00 | 2                  | 1.00E+00 | 2                  | 5.68E-01 | 2                  | 5.68E-01 |
| SCN10A   | 3   | 12                 | 4.74E-01 | 12                 | 4.74E-01 | 9                  | 5.68E-01 | 9                  | 5.68E-01 | 9                  | 8.09E-01 | 9                  | 8.09E-01 |
| DOCK1    | 10  | 6                  | 6.61E-01 | 6                  | 6.61E-01 | 4                  | 5.68E-01 | 4                  | 5.68E-01 | 2                  | 6.24E-01 | 2                  | 6.24E-01 |
| LDB3     | 10  | 1                  | 5.93E-02 | 1                  | 5.93E-02 |                    |          |                    |          | 1                  | 5.69E-01 | 1                  | 5.69E-01 |
| SERPINI1 | 3   | 1                  | 5.93E-02 | 1                  | 5.93E-02 |                    |          |                    |          | 1                  | 5.69E-01 | 1                  | 5.69E-01 |
| KIF9     | 3   | 5                  | 7.96E-01 | 6                  | 7.96E-01 | 4                  | 6.05E-01 | 5                  | 6.06E-01 | 1                  | 5.69E-01 | 2                  | 5.69E-01 |
| KBTBD2   | 7   | 1                  | 5.93E-02 | 1                  | 5.93E-02 |                    |          |                    |          | 1                  | 5.69E-01 | 1                  | 5.69E-01 |
| KIAA1841 | 2   | 4                  | 7.45E-01 | 4                  | 7.45E-01 | 3                  | 7.18E-01 | 3                  | 7.18E-01 | 1                  | 5.69E-01 | 1                  | 5.69E-01 |
| FAT3     | 11  | 18                 | 5.71E-01 | 18                 | 5.71E-01 | 13                 | 5.69E-01 | 13                 | 5.69E-01 | 10                 | 5.71E-01 | 10                 | 5.71E-01 |
| CTCF     | 20  | 2                  | 7.01E-01 | 2                  | 7.01E-01 | 2                  | 5.69E-01 | 2                  | 5.69E-01 | 1                  | 6.34E-01 | 1                  | 6.34E-01 |
| PM20D1   | 1   | 1                  | 8.44E-02 | 3                  | 9.11E-02 |                    |          |                    |          | 1                  | 6.55E-01 | 3                  | 7.19E-01 |
| TRMT1    | 19  | 3                  | 2.01E-01 | 3                  | 2.01E-01 | 3                  | 5.70E-01 | 3                  | 5.70E-01 |                    |          |                    |          |
| NCAPH    | 2   | 2                  | 2.76E-01 | 2                  | 2.76E-01 | 2                  | 5.70E-01 | 2                  | 5.70E-01 |                    |          |                    |          |
| CERKL    | 2   | 2                  | 5.82E-01 | 2                  | 5.82E-01 | 2                  | 5.70E-01 | 2                  | 5.70E-01 |                    |          |                    |          |
| LRRC20   | 10  | 3                  | 7.18E-01 | 3                  | 7.18E-01 | 3                  | 5.70E-01 | 3                  | 5.70E-01 | 1                  | 6.80E-01 | 1                  | 6.80E-01 |
| MLYCD    | 16  | 4                  | 1.00E+00 | 4                  | 1.00E+00 | 4                  | 5.70E-01 | 4                  | 5.70E-01 | 2                  | 6.53E-01 | 2                  | 6.53E-01 |
| NAT2     | 8   | 4                  | 7.87E-01 | 4                  | 7.87E-01 | 3                  | 5.70E-01 | 3                  | 5.70E-01 | 1                  | 6.13E-01 | 1                  | 6.13E-01 |
| SLC39A2  | 14  | 2                  | 4.53E-01 | 2                  | 4.53E-01 | 2                  | 5.71E-01 | 2                  | 5.71E-01 | 1                  | 1.00E+00 | 1                  | 1.00E+00 |
| HADH     | 4   | 3                  | 2.79E-01 | 3                  | 2.79E-01 | 2                  | 5.71E-01 | 2                  | 5.71E-01 | 2                  | 1.00E+00 | 2                  | 1.00E+00 |

| SetID   | Chr | ADEH- vs NA        |          |                    |          | ADEH+ vs ADEH-     |          |                    |          | ADEH+ vs NA        |          |                    |          |
|---------|-----|--------------------|----------|--------------------|----------|--------------------|----------|--------------------|----------|--------------------|----------|--------------------|----------|
|         |     | rare novel         |          | all                |          | rare novel         |          | all                |          | rare novel         |          | all                |          |
|         |     | N variants in test | p-value  | N variants in test | p-value  | N variants in test | p-value  | N variants in test | p-value  | N variants in test | p-value  | N variants in test | p-value  |
| OR10AD1 | 12  | 2                  | 5.67E-01 | 3                  | 5.89E-01 | 2                  | 6.55E-01 | 3                  | 6.44E-01 |                    |          | 1                  | 5.71E-01 |
| SH2D3C  | 9   | 3                  | 6.26E-01 | 3                  | 6.26E-01 | 2                  | 5.71E-01 | 2                  | 5.71E-01 | 2                  | 6.42E-01 | 2                  | 6.42E-01 |
| TBCD    | 17  | 4                  | 6.25E-01 | 4                  | 6.25E-01 | 3                  | 5.71E-01 | 3                  | 5.71E-01 | 1                  | 6.44E-01 | 1                  | 6.44E-01 |
| WDR35   | 2   | 6                  | 3.90E-01 | 6                  | 3.90E-01 | 5                  | 1.00E+00 | 5                  | 1.00E+00 | 4                  | 5.71E-01 | 4                  | 5.71E-01 |
| IL1RL2  | 2   | 3                  | 7.23E-01 | 3                  | 7.23E-01 | 3                  | 5.71E-01 | 3                  | 5.71E-01 | 1                  | 6.22E-01 | 1                  | 6.22E-01 |
| SPECC1  | 17  | 6                  | 6.93E-01 | 6                  | 6.93E-01 | 4                  | 5.71E-01 | 4                  | 5.71E-01 | 2                  | 6.23E-01 | 2                  | 6.23E-01 |
| CHGA    | 14  | 3                  | 7.11E-01 | 3                  | 7.11E-01 | 3                  | 5.71E-01 | 3                  | 5.71E-01 | 1                  | 6.55E-01 | 1                  | 6.55E-01 |
| NDUFS8  | 11  | 2                  | 7.53E-01 | 2                  | 7.53E-01 | 2                  | 5.71E-01 | 2                  | 5.71E-01 | 1                  | 6.89E-01 | 1                  | 6.89E-01 |
| PRKG2   | 4   | 2                  | 4.26E-01 | 2                  | 4.26E-01 | 1                  | 5.72E-01 | 1                  | 5.72E-01 | 1                  | 6.18E-01 | 1                  | 6.18E-01 |
| LRPAP1  | 4   | 1                  | 7.54E-01 | 1                  | 7.54E-01 | 1                  | 5.72E-01 | 1                  | 5.72E-01 |                    |          |                    |          |
| RNF148  | 7   | 1                  | 7.54E-01 | 1                  | 7.54E-01 | 1                  | 5.72E-01 | 1                  | 5.72E-01 |                    |          |                    |          |
| TUBB6   | 18  | 1                  | 7.54E-01 | 1                  | 7.54E-01 | 1                  | 5.72E-01 | 1                  | 5.72E-01 |                    |          |                    |          |
| ZNF350  | 19  | 1                  | 7.54E-01 | 1                  | 7.54E-01 | 1                  | 5.72E-01 | 1                  | 5.72E-01 |                    |          |                    |          |
| ZNF776  | 19  | 1                  | 7.54E-01 | 1                  | 7.54E-01 | 1                  | 5.72E-01 | 1                  | 5.72E-01 |                    |          |                    |          |
| CPT1C   | 19  | 4                  | 5.93E-01 | 4                  | 5.93E-01 | 3                  | 5.72E-01 | 3                  | 5.72E-01 | 1                  | 6.45E-01 | 1                  | 6.45E-01 |
| SAMM50  | 22  | 3                  | 6.36E-01 | 3                  | 6.36E-01 | 2                  | 5.72E-01 | 2                  | 5.72E-01 | 2                  | 6.53E-01 | 2                  | 6.53E-01 |
| ABCA12  | 2   | 5                  | 7.76E-01 | 5                  | 7.76E-01 | 4                  | 5.72E-01 | 4                  | 5.72E-01 | 1                  | 6.41E-01 | 1                  | 6.41E-01 |
| ALG11   | 13  | 2                  | 5.74E-01 | 2                  | 5.74E-01 | 2                  | 5.72E-01 | 2                  | 5.72E-01 |                    |          |                    |          |
| GTPBP3  | 19  | 4                  | 7.50E-01 | 4                  | 7.50E-01 | 4                  | 5.72E-01 | 4                  | 5.72E-01 | 1                  | 6.44E-01 | 1                  | 6.44E-01 |
| ECE2    | 3   | 3                  | 4.79E-01 | 4                  | 4.92E-01 | 2                  | 6.90E-01 | 3                  | 5.72E-01 | 1                  | 6.68E-01 | 2                  | 7.24E-01 |
| ALPK1   | 4   | 7                  | 2.35E-01 | 8                  | 2.35E-01 | 8                  | 7.40E-01 | 9                  | 7.40E-01 | 5                  | 5.72E-01 | 6                  | 5.72E-01 |
| CCNJL   | 5   | 3                  | 3.09E-01 | 3                  | 3.09E-01 | 3                  | 5.73E-01 | 3                  | 5.73E-01 |                    |          |                    |          |
| METTL17 | 14  | 3                  | 3.03E-01 | 3                  | 3.03E-01 | 2                  | 5.73E-01 | 2                  | 5.73E-01 | 1                  | 6.12E-01 | 1                  | 6.12E-01 |
| ZNF695  | 1   | 3                  | 7.23E-01 | 3                  | 7.23E-01 | 2                  | 5.73E-01 | 2                  | 5.73E-01 | 1                  | 6.32E-01 | 1                  | 6.32E-01 |
| DEFB127 | 20  |                    |          | 1                  | 1.52E-01 |                    |          | 1                  | 8.19E-01 |                    |          | 1                  | 5.73E-01 |
| OR5T3   | 11  | 2                  | 5.65E-01 | 2                  | 5.65E-01 | 2                  | 5.73E-01 | 2                  | 5.73E-01 |                    |          |                    |          |
| UMPS    | 3   | 1                  | 7.56E-01 | 1                  | 7.56E-01 | 1                  | 5.73E-01 | 1                  | 5.73E-01 |                    |          |                    |          |
| IRF3    | 19  | 1                  | 7.56E-01 | 1                  | 7.56E-01 | 1                  | 5.73E-01 | 1                  | 5.73E-01 |                    |          |                    |          |
| CRIP2   | 14  | 1                  | 7.56E-01 | 1                  | 7.56E-01 | 1                  | 5.73E-01 | 1                  | 5.73E-01 |                    |          |                    |          |
| SURF2   | 9   | 2                  | 4.34E-01 | 2                  | 4.34E-01 | 1                  | 5.73E-01 | 1                  | 5.73E-01 | 1                  | 6.55E-01 | 1                  | 6.55E-01 |
| TTC19   | 17  | 3                  | 1.40E-01 | 3                  | 1.40E-01 | 1                  | 5.73E-01 | 1                  | 5.73E-01 | 2                  | 6.27E-01 | 2                  | 6.27E-01 |
| FRMD6   | 14  | 1                  | 7.56E-01 | 1                  | 7.56E-01 | 1                  | 5.73E-01 | 1                  | 5.73E-01 |                    |          |                    |          |
| KLHDC8A | 1   | 2                  | 3.02E-01 | 2                  | 3.02E-01 | 1                  | 5.73E-01 | 1                  | 5.73E-01 | 1                  | 6.33E-01 | 1                  | 6.33E-01 |
| KCNAB3  | 17  | 2                  | 3.71E-01 | 2                  | 3.71E-01 | 1                  | 5.73E-01 | 1                  | 5.73E-01 | 1                  | 6.44E-01 | 1                  | 6.44E-01 |
| ST3GAL2 | 16  | 1                  | 7.56E-01 | 1                  | 7.56E-01 | 1                  | 5.73E-01 | 1                  | 5.73E-01 |                    |          |                    |          |
| CALCR   | 7   | 2                  | 5.74E-01 | 2                  | 5.74E-01 | 2                  | 5.73E-01 | 2                  | 5.73E-01 |                    |          |                    |          |
| UPF3A   | 13  | 1                  | 7.13E-02 | 1                  | 7.13E-02 |                    |          |                    |          | 1                  | 5.73E-01 | 1                  | 5.73E-01 |
| N6AMT2  | 13  | 1                  | 7.13E-02 | 1                  | 7.13E-02 |                    |          |                    |          | 1                  | 5.73E-01 | 1                  | 5.73E-01 |
| DPYSL2  | 8   | 1                  | 7.13E-02 | 1                  | 7.13E-02 |                    |          |                    |          | 1                  | 5.73E-01 | 1                  | 5.73E-01 |
| IFT43   | 14  | 1                  | 7.13E-02 | 1                  | 7.13E-02 |                    |          |                    |          | 1                  | 5.73E-01 | 1                  | 5.73E-01 |
| MRPL52  | 14  | 1                  | 7.13E-02 | 1                  | 7.13E-02 |                    |          |                    |          | 1                  | 5.73E-01 | 1                  | 5.73E-01 |
| KLHL1   | 13  | 4                  | 8.89E-01 | 4                  | 8.89E-01 | 3                  | 5.73E-01 | 3                  | 5.73E-01 | 2                  | 6.26E-01 | 2                  | 6.26E-01 |
| OR2B2   | 6   | 2                  | 5.68E-01 | 3                  | 8.29E-02 | 2                  | 6.24E-01 | 3                  | 5.73E-01 |                    |          | 1                  | 1.00E+00 |
| GSR     | 8   | 5                  | 8.70E-01 | 5                  | 8.70E-01 | 4                  | 8.50E-01 | 4                  | 8.50E-01 | 2                  | 5.74E-01 | 2                  | 5.74E-01 |
| TSTD2   | 9   | 2                  | 5.67E-01 | 2                  | 5.67E-01 | 2                  | 5.74E-01 | 2                  | 5.74E-01 |                    |          |                    |          |
| GPR63   | 6   | 2                  | 3.04E-01 | 2                  | 3.04E-01 | 2                  | 5.74E-01 | 2                  | 5.74E-01 |                    |          |                    |          |
| BRPF3   | 6   | 5                  | 7.45E-01 | 5                  | 7.45E-01 | 4                  | 5.74E-01 | 4                  | 5.74E-01 | 1                  | 5.92E-01 | 1                  | 5.92E-01 |
| GLI4    | 8   | 2                  | 5.41E-01 | 2                  | 5.41E-01 | 2                  | 5.74E-01 | 2                  | 5.74E-01 |                    |          |                    |          |

| SetID    | Chr | ADEH- vs NA        |          |                    |          | ADEH+ vs ADEH-     |          |                    |          | ADEH+ vs NA        |          |                    |          |
|----------|-----|--------------------|----------|--------------------|----------|--------------------|----------|--------------------|----------|--------------------|----------|--------------------|----------|
|          |     | rarenovel          |          | all                |          | rarenovel          |          | all                |          | rarenovel          |          | all                |          |
|          |     | N variants in test | p-value  | N variants in test | p-value  | N variants in test | p-value  | N variants in test | p-value  | N variants in test | p-value  | N variants in test | p-value  |
| CPEB2    | 4   | 4                  | 7.61E-01 | 4                  | 7.61E-01 | 4                  | 5.74E-01 | 4                  | 5.74E-01 | 1                  | 6.10E-01 | 1                  | 6.10E-01 |
| ATP13A4  | 3   | 3                  | 6.68E-01 | 3                  | 6.68E-01 | 2                  | 5.74E-01 | 2                  | 5.74E-01 | 1                  | 6.07E-01 | 1                  | 6.07E-01 |
| GABPB2   | 1   | 2                  | 5.88E-01 | 2                  | 5.88E-01 | 2                  | 5.74E-01 | 2                  | 5.74E-01 |                    |          |                    |          |
| PIWIL4   | 11  | 4                  | 6.11E-01 | 4                  | 6.11E-01 | 3                  | 5.75E-01 | 3                  | 5.75E-01 | 1                  | 6.68E-01 | 1                  | 6.68E-01 |
| RAB32    | 6   | 3                  | 6.43E-01 | 3                  | 6.43E-01 | 2                  | 5.75E-01 | 2                  | 5.75E-01 | 2                  | 6.30E-01 | 2                  | 6.30E-01 |
| GAREM1   | 18  | 5                  | 7.43E-01 | 5                  | 7.43E-01 | 4                  | 5.75E-01 | 4                  | 5.75E-01 | 1                  | 6.09E-01 | 1                  | 6.09E-01 |
| SIGLEC12 | 19  | 5                  | 8.39E-01 | 6                  | 8.35E-01 | 5                  | 6.94E-01 | 6                  | 7.08E-01 | 4                  | 5.75E-01 | 5                  | 5.83E-01 |
| GRK1     | 13  | 3                  | 7.49E-01 | 3                  | 7.49E-01 | 3                  | 5.75E-01 | 3                  | 5.75E-01 | 1                  | 6.28E-01 | 1                  | 6.28E-01 |
| PPFIA1   | 11  | 4                  | 7.59E-01 | 4                  | 7.59E-01 | 4                  | 5.76E-01 | 4                  | 5.76E-01 | 1                  | 6.12E-01 | 1                  | 6.12E-01 |
| REL      | 2   | 1                  | 7.52E-01 | 1                  | 7.52E-01 | 1                  | 5.76E-01 | 1                  | 5.76E-01 |                    |          |                    |          |
| BMP7     | 20  | 3                  | 1.38E-01 | 3                  | 1.38E-01 | 1                  | 5.76E-01 | 1                  | 5.76E-01 | 2                  | 6.38E-01 | 2                  | 6.38E-01 |
| MADCAM1  | 19  | 1                  | 7.52E-01 | 1                  | 7.52E-01 | 1                  | 5.76E-01 | 1                  | 5.76E-01 |                    |          |                    |          |
| ZNF12    | 7   | 4                  | 2.18E-01 | 4                  | 2.18E-01 | 4                  | 5.76E-01 | 4                  | 5.76E-01 |                    |          |                    |          |
| PLS1     | 3   | 3                  | 7.30E-01 | 3                  | 7.30E-01 | 3                  | 5.76E-01 | 3                  | 5.76E-01 | 1                  | 6.29E-01 | 1                  | 6.29E-01 |
| C10orf71 | 10  | 3                  | 6.65E-01 | 3                  | 6.65E-01 | 2                  | 1.00E+00 | 2                  | 1.00E+00 | 3                  | 5.76E-01 | 3                  | 5.76E-01 |
| ZNF514   | 2   | 3                  | 2.12E-01 | 3                  | 2.12E-01 | 3                  | 5.77E-01 | 3                  | 5.77E-01 |                    |          |                    |          |
| ZNF823   | 19  | 3                  | 7.16E-01 | 3                  | 7.16E-01 | 2                  | 5.77E-01 | 2                  | 5.77E-01 | 1                  | 6.53E-01 | 1                  | 6.53E-01 |
| PPP1R16A | 8   | 4                  | 2.02E-01 | 4                  | 2.02E-01 | 4                  | 5.77E-01 | 4                  | 5.77E-01 |                    |          |                    |          |
| SBF2     | 11  | 3                  | 7.53E-01 | 3                  | 7.53E-01 | 2                  | 6.34E-01 | 2                  | 6.34E-01 | 1                  | 5.77E-01 | 1                  | 5.77E-01 |
| IQCF5    | 3   | 1                  | 9.19E-02 | 1                  | 9.19E-02 |                    |          |                    |          | 1                  | 5.77E-01 | 1                  | 5.77E-01 |
| MRPL24   | 1   | 1                  | 9.19E-02 | 1                  | 9.19E-02 |                    |          |                    |          | 1                  | 5.77E-01 | 1                  | 5.77E-01 |
| EMILIN1  | 2   | 3                  | 7.11E-01 | 3                  | 7.11E-01 | 2                  | 6.39E-01 | 2                  | 6.39E-01 | 1                  | 5.77E-01 | 1                  | 5.77E-01 |
| TRH      | 3   | 1                  | 5.55E-01 | 1                  | 5.55E-01 | 1                  | 5.77E-01 | 1                  | 5.77E-01 | 1                  | 6.30E-01 | 1                  | 6.30E-01 |
| TMC3     | 15  | 9                  | 1.00E+00 | 9                  | 1.00E+00 | 8                  | 5.77E-01 | 8                  | 5.77E-01 | 5                  | 7.17E-01 | 5                  | 7.17E-01 |
| GJB5     | 1   | 3                  | 2.39E-01 | 3                  | 2.39E-01 | 3                  | 5.77E-01 | 3                  | 5.77E-01 |                    |          |                    |          |
| SLC25A21 | 14  | 2                  | 5.70E-01 | 2                  | 5.70E-01 | 2                  | 5.77E-01 | 2                  | 5.77E-01 |                    |          |                    |          |
| STK32B   | 4   | 3                  | 6.48E-01 | 3                  | 6.48E-01 | 2                  | 5.77E-01 | 2                  | 5.77E-01 | 1                  | 6.53E-01 | 1                  | 6.53E-01 |
| OR4C15   | 11  | 6                  | 8.27E-01 | 8                  | 1.00E+00 | 5                  | 1.00E+00 | 7                  | 1.00E+00 | 3                  | 5.77E-01 | 5                  | 7.85E-01 |
| DEGS1    | 1   | 2                  | 3.15E-01 | 2                  | 3.15E-01 | 2                  | 5.77E-01 | 2                  | 5.77E-01 |                    |          |                    |          |
| FARSA    | 19  | 1                  | 2.09E-01 | 1                  | 2.09E-01 | 1                  | 5.78E-01 | 1                  | 5.78E-01 |                    |          |                    |          |
| ANGPTL3  | 1   | 3                  | 9.10E-01 | 3                  | 9.10E-01 | 3                  | 5.78E-01 | 3                  | 5.78E-01 | 1                  | 6.12E-01 | 1                  | 6.12E-01 |
| HLA-F    | 6   | 2                  | 5.78E-01 | 2                  | 5.78E-01 | 2                  | 5.78E-01 | 2                  | 5.78E-01 |                    |          |                    |          |
| MAST3    | 19  | 3                  | 8.88E-02 | 3                  | 8.88E-02 | 1                  | 5.78E-01 | 1                  | 5.78E-01 | 2                  | 6.38E-01 | 2                  | 6.38E-01 |
| PPWD1    | 5   | 1                  | 6.81E-01 | 1                  | 6.81E-01 | 1                  | 5.78E-01 | 1                  | 5.78E-01 |                    |          |                    |          |
| WDR31    | 9   | 2                  | 2.48E-01 | 2                  | 2.48E-01 | 1                  | 5.78E-01 | 1                  | 5.78E-01 | 1                  | 6.43E-01 | 1                  | 6.43E-01 |
| PRM2     | 16  | 1                  | 6.81E-01 | 1                  | 6.81E-01 | 1                  | 5.78E-01 | 1                  | 5.78E-01 |                    |          |                    |          |
| ZNF497   | 19  | 2                  | 3.30E-01 | 2                  | 3.30E-01 | 1                  | 5.78E-01 | 1                  | 5.78E-01 | 1                  | 6.28E-01 | 1                  | 6.28E-01 |
| NUDT15   | 13  | 1                  | 6.81E-01 | 1                  | 6.81E-01 | 1                  | 5.78E-01 | 1                  | 5.78E-01 |                    |          |                    |          |
| SLC29A2  | 11  | 1                  | 6.81E-01 | 1                  | 6.81E-01 | 1                  | 5.78E-01 | 1                  | 5.78E-01 |                    |          |                    |          |
| CLIP2    | 7   | 1                  | 6.81E-01 | 1                  | 6.81E-01 | 1                  | 5.78E-01 | 1                  | 5.78E-01 |                    |          |                    |          |
| C17orf47 | 17  | 2                  | 3.58E-01 | 2                  | 3.58E-01 | 1                  | 5.78E-01 | 1                  | 5.78E-01 | 1                  | 5.93E-01 | 1                  | 5.93E-01 |
| C1orf54  | 1   | 1                  | 6.81E-01 | 1                  | 6.81E-01 | 1                  | 5.78E-01 | 1                  | 5.78E-01 |                    |          |                    |          |
| MMP7     | 11  | 1                  | 6.81E-01 | 1                  | 6.81E-01 | 1                  | 5.78E-01 | 1                  | 5.78E-01 |                    |          |                    |          |
| KRT13    | 17  | 4                  | 2.31E-01 | 4                  | 2.31E-01 | 4                  | 5.78E-01 | 4                  | 5.78E-01 |                    |          |                    |          |
| SFTPA1   | 10  | 1                  | 7.57E-01 | 1                  | 7.57E-01 | 1                  | 5.78E-01 | 1                  | 5.78E-01 |                    |          |                    |          |
| SLC6A12  | 12  | 1                  | 7.57E-01 | 1                  | 7.57E-01 | 1                  | 5.78E-01 | 1                  | 5.78E-01 |                    |          |                    |          |
| KCNQ5    | 6   | 1                  | 7.57E-01 | 1                  | 7.57E-01 | 1                  | 5.78E-01 | 1                  | 5.78E-01 |                    |          |                    |          |
| TRPC6    | 11  | 2                  | 3.77E-01 | 2                  | 3.77E-01 | 1                  | 5.78E-01 | 1                  | 5.78E-01 | 1                  | 5.93E-01 | 1                  | 5.93E-01 |

| SetID   | Chr | ADEH- vs NA        |          |                    |          | ADEH+ vs ADEH-     |          |                    |          | ADEH+ vs NA        |          |                    |          |
|---------|-----|--------------------|----------|--------------------|----------|--------------------|----------|--------------------|----------|--------------------|----------|--------------------|----------|
|         |     | rare novel         |          | all                |          | rare novel         |          | all                |          | rare novel         |          | all                |          |
|         |     | N variants in test | p-value  | N variants in test | p-value  | N variants in test | p-value  | N variants in test | p-value  | N variants in test | p-value  | N variants in test | p-value  |
| ANXA1   | 9   | 1                  | 7.57E-01 | 1                  | 7.57E-01 | 1                  | 5.78E-01 | 1                  | 5.78E-01 |                    |          |                    |          |
| CYTIP   | 2   | 1                  | 7.57E-01 | 1                  | 7.57E-01 | 1                  | 5.78E-01 | 1                  | 5.78E-01 |                    |          |                    |          |
| SERGEF  | 11  | 3                  | 7.60E-01 | 3                  | 7.60E-01 | 3                  | 5.78E-01 | 3                  | 5.78E-01 | 1                  | 6.16E-01 | 1                  | 6.16E-01 |
| SLC7A10 | 19  | 3                  | 4.75E-01 | 3                  | 4.75E-01 | 2                  | 5.79E-01 | 2                  | 5.79E-01 | 1                  | 6.27E-01 | 1                  | 6.27E-01 |
| ARMC3   | 10  | 5                  | 6.64E-01 | 5                  | 6.64E-01 | 4                  | 1.00E+00 | 4                  | 1.00E+00 | 2                  | 5.79E-01 | 2                  | 5.79E-01 |
| DCTN4   | 5   | 1                  | 7.59E-01 | 1                  | 7.59E-01 | 1                  | 5.79E-01 | 1                  | 5.79E-01 |                    |          |                    |          |
| LRFN2   | 6   | 2                  | 4.36E-01 | 2                  | 4.36E-01 | 1                  | 5.79E-01 | 1                  | 5.79E-01 | 1                  | 6.24E-01 | 1                  | 6.24E-01 |
| COPS4   | 4   | 1                  | 7.59E-01 | 1                  | 7.59E-01 | 1                  | 5.79E-01 | 1                  | 5.79E-01 |                    |          |                    |          |
| ZNHIT2  | 11  | 1                  | 7.59E-01 | 1                  | 7.59E-01 | 1                  | 5.79E-01 | 1                  | 5.79E-01 |                    |          |                    |          |
| CPSF3L  | 1   | 2                  | 2.92E-01 | 2                  | 2.92E-01 | 1                  | 5.79E-01 | 1                  | 5.79E-01 | 1                  | 6.33E-01 | 1                  | 6.33E-01 |
| TCAF1   | 7   | 1                  | 7.59E-01 | 1                  | 7.59E-01 | 1                  | 5.79E-01 | 1                  | 5.79E-01 |                    |          |                    |          |
| RNF220  | 1   | 1                  | 7.59E-01 | 1                  | 7.59E-01 | 1                  | 5.79E-01 | 1                  | 5.79E-01 |                    |          |                    |          |
| NUPR1   | 16  | 1                  | 7.59E-01 | 1                  | 7.59E-01 | 1                  | 5.79E-01 | 1                  | 5.79E-01 |                    |          |                    |          |
| TADA3   | 3   | 1                  | 7.59E-01 | 1                  | 7.59E-01 | 1                  | 5.79E-01 | 1                  | 5.79E-01 |                    |          |                    |          |
| PARP1   | 1   | 3                  | 7.24E-01 | 3                  | 7.24E-01 | 2                  | 6.22E-01 | 2                  | 6.22E-01 | 1                  | 5.79E-01 | 1                  | 5.79E-01 |
| HECTD1  | 14  | 4                  | 8.45E-01 | 4                  | 8.45E-01 | 3                  | 7.61E-01 | 3                  | 7.61E-01 | 1                  | 5.79E-01 | 1                  | 5.79E-01 |
| ENTHD1  | 22  | 3                  | 7.14E-01 | 3                  | 7.14E-01 | 2                  | 6.29E-01 | 2                  | 6.29E-01 | 1                  | 5.79E-01 | 1                  | 5.79E-01 |
| MARCO   | 2   | 1                  | 8.49E-02 | 1                  | 8.49E-02 |                    |          |                    |          | 1                  | 5.79E-01 | 1                  | 5.79E-01 |
| CT62    | 15  | 1                  | 8.49E-02 | 1                  | 8.49E-02 |                    |          |                    |          | 1                  | 5.79E-01 | 1                  | 5.79E-01 |
| HMBS    | 11  | 1                  | 8.49E-02 | 1                  | 8.49E-02 |                    |          |                    |          | 1                  | 5.79E-01 | 1                  | 5.79E-01 |
| SRM     | 1   | 1                  | 8.49E-02 | 1                  | 8.49E-02 |                    |          |                    |          | 1                  | 5.79E-01 | 1                  | 5.79E-01 |
| SYT10   | 12  | 1                  | 8.49E-02 | 1                  | 8.49E-02 |                    |          |                    |          | 1                  | 5.79E-01 | 1                  | 5.79E-01 |
| MMP10   | 11  | 3                  | 1.00E+00 | 3                  | 1.00E+00 | 3                  | 5.79E-01 | 3                  | 5.79E-01 | 2                  | 6.14E-01 | 2                  | 6.14E-01 |
| RAD54L2 | 3   | 7                  | 7.81E-01 | 7                  | 7.81E-01 | 5                  | 5.79E-01 | 5                  | 5.79E-01 | 3                  | 6.46E-01 | 3                  | 6.46E-01 |
| OR9A4   | 7   | 4                  | 3.76E-01 | 4                  | 3.76E-01 | 4                  | 5.80E-01 | 4                  | 5.80E-01 |                    |          |                    |          |
| CYP7B1  | 8   | 2                  | 3.26E-01 | 2                  | 3.26E-01 | 2                  | 5.80E-01 | 2                  | 5.80E-01 |                    |          |                    |          |
| DCAF6   | 1   | 2                  | 5.75E-01 | 2                  | 5.75E-01 | 2                  | 5.80E-01 | 2                  | 5.80E-01 |                    |          |                    |          |
| CCDC18  | 1   | 4                  | 7.80E-01 | 4                  | 7.80E-01 | 5                  | 6.85E-01 | 5                  | 6.85E-01 | 2                  | 5.80E-01 | 2                  | 5.80E-01 |
| PPP1R36 | 14  | 4                  | 2.26E-01 | 4                  | 2.26E-01 | 4                  | 5.80E-01 | 4                  | 5.80E-01 |                    |          |                    |          |
| MB21D1  | 6   | 3                  | 4.94E-01 | 4                  | 4.94E-01 | 2                  | 5.80E-01 | 3                  | 5.80E-01 | 1                  | 6.34E-01 | 2                  | 6.34E-01 |
| FBN3    | 19  | 23                 | 8.50E-02 | 25                 | 8.50E-02 | 18                 | 5.80E-01 | 20                 | 5.80E-01 | 12                 | 7.22E-01 | 14                 | 7.22E-01 |
| FGFR1OP | 6   | 1                  | 7.91E-02 | 1                  | 7.91E-02 |                    |          |                    |          | 1                  | 5.80E-01 | 1                  | 5.80E-01 |
| ZNF407  | 18  | 4                  | 8.17E-01 | 4                  | 8.17E-01 | 3                  | 6.46E-01 | 3                  | 6.46E-01 | 1                  | 5.80E-01 | 1                  | 5.80E-01 |
| SLC4A9  | 5   | 5                  | 7.34E-01 | 5                  | 7.34E-01 | 4                  | 8.64E-01 | 4                  | 8.64E-01 | 1                  | 5.80E-01 | 1                  | 5.80E-01 |
| STRN4   | 19  | 2                  | 3.68E-01 | 2                  | 3.68E-01 | 1                  | 5.87E-01 | 1                  | 5.87E-01 | 1                  | 5.80E-01 | 1                  | 5.80E-01 |
| CABP4   | 11  | 2                  | 1.00E+00 | 2                  | 1.00E+00 | 2                  | 5.96E-01 | 2                  | 5.96E-01 | 1                  | 5.80E-01 | 1                  | 5.80E-01 |
| MKNK1   | 1   | 1                  | 7.91E-02 | 1                  | 7.91E-02 |                    |          |                    |          | 1                  | 5.80E-01 | 1                  | 5.80E-01 |
| CA14    | 1   | 1                  | 7.91E-02 | 1                  | 7.91E-02 |                    |          |                    |          | 1                  | 5.80E-01 | 1                  | 5.80E-01 |
| PEX5    | 12  | 2                  | 1.00E+00 | 2                  | 1.00E+00 | 2                  | 5.88E-01 | 2                  | 5.88E-01 | 1                  | 5.80E-01 | 1                  | 5.80E-01 |
| MDH2    | 7   | 1                  | 7.12E-02 | 1                  | 7.12E-02 |                    |          |                    |          | 1                  | 5.80E-01 | 1                  | 5.80E-01 |
| TTC37   | 5   | 4                  | 2.06E-01 | 4                  | 2.06E-01 | 4                  | 5.80E-01 | 4                  | 5.80E-01 |                    |          |                    |          |
| PADI1   | 1   | 6                  | 6.76E-01 | 6                  | 6.76E-01 | 4                  | 5.80E-01 | 4                  | 5.80E-01 | 2                  | 6.39E-01 | 2                  | 6.39E-01 |
| PPHLN1  | 12  | 1                  | 7.90E-02 | 1                  | 7.90E-02 |                    |          |                    |          | 1                  | 5.81E-01 | 1                  | 5.81E-01 |
| BRF2    | 8   | 3                  | 7.48E-01 | 3                  | 7.48E-01 | 3                  | 6.47E-01 | 3                  | 6.47E-01 | 1                  | 5.81E-01 | 1                  | 5.81E-01 |
| FAM98C  | 19  | 2                  | 1.00E+00 | 2                  | 1.00E+00 | 2                  | 6.56E-01 | 2                  | 6.56E-01 | 1                  | 5.81E-01 | 1                  | 5.81E-01 |
| WWP2    | 16  | 1                  | 7.90E-02 | 1                  | 7.90E-02 |                    |          |                    |          | 1                  | 5.81E-01 | 1                  | 5.81E-01 |
| KLHL12  | 1   | 1                  | 7.90E-02 | 1                  | 7.90E-02 |                    |          |                    |          | 1                  | 5.81E-01 | 1                  | 5.81E-01 |
| GALNT12 | 9   | 4                  | 8.20E-01 | 4                  | 8.20E-01 | 3                  | 7.50E-01 | 3                  | 7.50E-01 | 1                  | 5.81E-01 | 1                  | 5.81E-01 |

| SetID    | Chr | ADEH- vs NA        |          |                    |          | ADEH+ vs ADEH-     |          |                    |          | ADEH+ vs NA        |          |                    |          |
|----------|-----|--------------------|----------|--------------------|----------|--------------------|----------|--------------------|----------|--------------------|----------|--------------------|----------|
|          |     | rare novel         |          | all                |          | rare novel         |          | all                |          | rare novel         |          | all                |          |
|          |     | N variants in test | p-value  | N variants in test | p-value  | N variants in test | p-value  | N variants in test | p-value  | N variants in test | p-value  | N variants in test | p-value  |
| ARID5B   | 10  | 3                  | 6.31E-01 | 3                  | 6.31E-01 | 3                  | 5.81E-01 | 3                  | 5.81E-01 |                    |          |                    |          |
| SPTBN1   | 2   | 6                  | 6.40E-01 | 6                  | 6.40E-01 | 4                  | 5.81E-01 | 4                  | 5.81E-01 | 2                  | 6.11E-01 | 2                  | 6.11E-01 |
| TMEM245  | 9   | 2                  | 6.79E-01 | 2                  | 6.79E-01 | 1                  | 1.00E+00 | 1                  | 1.00E+00 | 2                  | 5.81E-01 | 2                  | 5.81E-01 |
| KIAA1468 | 18  | 2                  | 3.17E-01 | 2                  | 3.17E-01 | 2                  | 5.81E-01 | 2                  | 5.81E-01 |                    |          |                    |          |
| RSBN1    | 1   | 2                  | 3.13E-01 | 2                  | 3.13E-01 | 2                  | 5.81E-01 | 2                  | 5.81E-01 |                    |          |                    |          |
| UBP1     | 3   | 2                  | 7.22E-01 | 2                  | 7.22E-01 | 2                  | 1.00E+00 | 2                  | 1.00E+00 | 1                  | 5.81E-01 | 1                  | 5.81E-01 |
| BCHE     | 3   | 3                  | 7.16E-01 | 3                  | 7.16E-01 | 2                  | 6.19E-01 | 2                  | 6.19E-01 | 1                  | 5.81E-01 | 1                  | 5.81E-01 |
| PLCZ1    | 12  | 1                  | 8.66E-02 | 1                  | 8.66E-02 |                    |          |                    |          | 1                  | 5.81E-01 | 1                  | 5.81E-01 |
| NNMT     | 11  | 1                  | 8.66E-02 | 1                  | 8.66E-02 |                    |          |                    |          | 1                  | 5.81E-01 | 1                  | 5.81E-01 |
| CNGA3    | 2   | 3                  | 7.25E-01 | 3                  | 7.25E-01 | 2                  | 6.05E-01 | 2                  | 6.05E-01 | 1                  | 5.81E-01 | 1                  | 5.81E-01 |
| PWP2     | 21  | 4                  | 1.00E+00 | 4                  | 1.00E+00 | 4                  | 5.81E-01 | 4                  | 5.81E-01 | 2                  | 6.34E-01 | 2                  | 6.34E-01 |
| CARKD    | 13  | 2                  | 5.75E-01 | 2                  | 5.75E-01 | 2                  | 5.81E-01 | 2                  | 5.81E-01 |                    |          |                    |          |
| RNF213   | 17  | 14                 | 8.28E-01 | 15                 | 8.28E-01 | 13                 | 7.24E-01 | 14                 | 7.23E-01 | 5                  | 5.82E-01 | 6                  | 6.36E-01 |
| AEBP1    | 7   | 6                  | 2.67E-01 | 6                  | 2.67E-01 | 3                  | 7.40E-01 | 3                  | 7.40E-01 | 3                  | 5.82E-01 | 3                  | 5.82E-01 |
| FAM65C   | 20  | 6                  | 3.24E-01 | 6                  | 3.24E-01 | 5                  | 1.00E+00 | 5                  | 1.00E+00 | 3                  | 5.82E-01 | 3                  | 5.82E-01 |
| ELL      | 19  | 1                  | 8.69E-02 | 1                  | 8.69E-02 |                    |          |                    |          | 1                  | 5.82E-01 | 1                  | 5.82E-01 |
| VIMP     | 15  | 1                  | 8.69E-02 | 1                  | 8.69E-02 |                    |          |                    |          | 1                  | 5.82E-01 | 1                  | 5.82E-01 |
| KCNT2    | 1   | 3                  | 7.19E-01 | 3                  | 7.19E-01 | 2                  | 6.12E-01 | 2                  | 6.12E-01 | 1                  | 5.82E-01 | 1                  | 5.82E-01 |
| OR9K2    | 12  | 4                  | 8.35E-01 | 4                  | 8.35E-01 | 3                  | 7.53E-01 | 3                  | 7.53E-01 | 1                  | 5.82E-01 | 1                  | 5.82E-01 |
| CDH20    | 18  | 3                  | 7.04E-01 | 3                  | 7.04E-01 | 2                  | 6.42E-01 | 2                  | 6.42E-01 | 1                  | 5.82E-01 | 1                  | 5.82E-01 |
| MMP2     | 16  | 3                  | 7.07E-01 | 3                  | 7.07E-01 | 2                  | 6.28E-01 | 2                  | 6.28E-01 | 1                  | 5.82E-01 | 1                  | 5.82E-01 |
| CDK10    | 16  | 1                  | 7.51E-01 | 1                  | 7.51E-01 | 1                  | 5.82E-01 | 1                  | 5.82E-01 |                    |          |                    |          |
| RAB3GAP2 | 1   | 3                  | 1.30E-01 | 3                  | 1.30E-01 | 1                  | 5.82E-01 | 1                  | 5.82E-01 | 2                  | 6.41E-01 | 2                  | 6.41E-01 |
| FEM1B    | 15  | 1                  | 7.51E-01 | 1                  | 7.51E-01 | 1                  | 5.82E-01 | 1                  | 5.82E-01 |                    |          |                    |          |
| IFNL1    | 19  | 1                  | 6.88E-01 | 1                  | 6.88E-01 | 1                  | 5.82E-01 | 1                  | 5.82E-01 | 1                  | 6.01E-01 | 1                  | 6.01E-01 |
| ARSA     | 22  | 1                  | 7.51E-01 | 2                  | 1.52E-01 | 1                  | 5.82E-01 | 2                  | 8.94E-01 |                    |          | 1                  | 6.05E-01 |
| ADAM22   | 7   | 1                  | 7.51E-01 | 1                  | 7.51E-01 | 1                  | 5.82E-01 | 1                  | 5.82E-01 |                    |          |                    |          |
| KCNV2    | 9   | 1                  | 7.51E-01 | 1                  | 7.51E-01 | 1                  | 5.82E-01 | 1                  | 5.82E-01 |                    |          |                    |          |
| CYB5R3   | 22  | 1                  | 7.29E-02 | 1                  | 7.29E-02 |                    |          |                    |          | 1                  | 5.82E-01 | 1                  | 5.82E-01 |
| KCNK17   | 6   | 1                  | 7.29E-02 | 1                  | 7.29E-02 |                    |          |                    |          | 1                  | 5.82E-01 | 1                  | 5.82E-01 |
| GARS     | 7   | 3                  | 6.65E-01 | 3                  | 6.65E-01 | 2                  | 5.96E-01 | 2                  | 5.96E-01 | 1                  | 5.82E-01 | 1                  | 5.82E-01 |
| IGFBP6   | 12  | 1                  | 7.29E-02 | 1                  | 7.29E-02 |                    |          |                    |          | 1                  | 5.82E-01 | 1                  | 5.82E-01 |
| ERVV-2   | 19  | 1                  | 7.29E-02 | 1                  | 7.29E-02 |                    |          |                    |          | 1                  | 5.82E-01 | 1                  | 5.82E-01 |
| FBXW9    | 19  | 1                  | 7.29E-02 | 1                  | 7.29E-02 |                    |          |                    |          | 1                  | 5.82E-01 | 1                  | 5.82E-01 |
| AKAP7    | 6   | 1                  | 7.29E-02 | 1                  | 7.29E-02 |                    |          |                    |          | 1                  | 5.82E-01 | 1                  | 5.82E-01 |
| HADHA    | 2   | 1                  | 7.29E-02 | 1                  | 7.29E-02 |                    |          |                    |          | 1                  | 5.82E-01 | 1                  | 5.82E-01 |
| USH1C    | 11  | 3                  | 4.81E-01 | 3                  | 4.81E-01 | 2                  | 5.82E-01 | 2                  | 5.82E-01 | 1                  | 6.72E-01 | 1                  | 6.72E-01 |
| RMI1     | 9   | 2                  | 5.90E-01 | 2                  | 5.90E-01 | 2                  | 5.82E-01 | 2                  | 5.82E-01 |                    |          |                    |          |
| KPNA2    | 17  | 3                  | 4.68E-01 | 3                  | 4.68E-01 | 3                  | 1.00E+00 | 3                  | 1.00E+00 | 3                  | 5.82E-01 | 3                  | 5.82E-01 |
| SPIRE2   | 16  | 5                  | 4.57E-01 | 5                  | 4.57E-01 | 3                  | 5.82E-01 | 3                  | 5.82E-01 | 2                  | 6.53E-01 | 2                  | 6.53E-01 |
| PRR15    | 7   |                    |          | 1                  | 2.36E-01 |                    |          | 1                  | 1.00E+00 |                    |          | 1                  | 5.83E-01 |
| WRAP73   | 1   | 3                  | 7.54E-01 | 3                  | 7.54E-01 | 3                  | 5.83E-01 | 3                  | 5.83E-01 | 1                  | 6.50E-01 | 1                  | 6.50E-01 |
| CNGB1    | 16  | 8                  | 6.15E-01 | 8                  | 6.15E-01 | 7                  | 5.83E-01 | 7                  | 5.83E-01 | 6                  | 7.50E-01 | 6                  | 7.50E-01 |
| RANBP10  | 16  | 2                  | 9.17E-01 | 2                  | 9.17E-01 | 2                  | 5.83E-01 | 2                  | 5.83E-01 | 1                  | 5.92E-01 | 1                  | 5.92E-01 |
| SEMA4D   | 9   | 2                  | 7.98E-01 | 2                  | 7.98E-01 | 2                  | 5.83E-01 | 2                  | 5.83E-01 | 1                  | 5.92E-01 | 1                  | 5.92E-01 |
| NIPBL    | 5   | 3                  | 6.94E-01 | 3                  | 6.94E-01 | 2                  | 5.83E-01 | 2                  | 5.83E-01 | 1                  | 6.10E-01 | 1                  | 6.10E-01 |
| PAX5     | 9   | 2                  | 7.89E-01 | 2                  | 7.89E-01 | 2                  | 5.83E-01 | 2                  | 5.83E-01 | 1                  | 5.98E-01 | 1                  | 5.98E-01 |
| NMUR1    | 2   | 3                  | 7.28E-01 | 3                  | 7.28E-01 | 3                  | 5.84E-01 | 3                  | 5.84E-01 | 1                  | 6.70E-01 | 1                  | 6.70E-01 |

| SetID    | Chr | ADEH- vs NA        |          |                    |          | ADEH+ vs ADEH-     |          |                    |          | ADEH+ vs NA        |          |                    |          |
|----------|-----|--------------------|----------|--------------------|----------|--------------------|----------|--------------------|----------|--------------------|----------|--------------------|----------|
|          |     | rarenovel          |          | all                |          | rarenovel          |          | all                |          | rarenovel          |          | all                |          |
|          |     | N variants in test | p-value  | N variants in test | p-value  | N variants in test | p-value  | N variants in test | p-value  | N variants in test | p-value  | N variants in test | p-value  |
| DOCK8    | 9   | 15                 | 1.40E-01 | 16                 | 1.56E-01 | 8                  | 5.84E-01 | 9                  | 5.91E-01 | 10                 | 7.87E-01 | 11                 | 7.78E-01 |
| TMOD3    | 15  | 2                  | 5.75E-01 | 2                  | 5.75E-01 | 2                  | 5.84E-01 | 2                  | 5.84E-01 |                    |          |                    |          |
| OR5F1    | 11  | 4                  | 2.85E-01 | 4                  | 2.85E-01 | 4                  | 6.79E-01 | 4                  | 6.79E-01 | 3                  | 5.84E-01 | 3                  | 5.84E-01 |
| C6orf141 | 6   | 2                  | 7.37E-01 | 2                  | 7.37E-01 | 2                  | 5.84E-01 | 2                  | 5.84E-01 | 1                  | 6.45E-01 | 1                  | 6.45E-01 |
| HPS5     | 11  | 6                  | 2.03E-01 | 7                  | 3.08E-01 | 4                  | 7.80E-01 | 5                  | 8.15E-01 | 4                  | 6.65E-01 | 5                  | 5.84E-01 |
| NUGGC    | 8   | 2                  | 9.24E-01 | 2                  | 9.24E-01 | 2                  | 5.84E-01 | 2                  | 5.84E-01 | 1                  | 6.44E-01 | 1                  | 6.44E-01 |
| SPRY4    | 5   | 3                  | 1.00E+00 | 3                  | 1.00E+00 | 3                  | 1.00E+00 | 3                  | 1.00E+00 | 1                  | 5.84E-01 | 1                  | 5.84E-01 |
| UNC79    | 14  | 5                  | 3.60E-01 | 5                  | 3.60E-01 | 5                  | 5.85E-01 | 5                  | 5.85E-01 | 2                  | 1.00E+00 | 2                  | 1.00E+00 |
| FBXL13   | 7   | 4                  | 6.02E-01 | 4                  | 6.02E-01 | 3                  | 5.85E-01 | 3                  | 5.85E-01 | 2                  | 8.79E-01 | 2                  | 8.79E-01 |
| FOXK1    | 7   | 3                  | 3.05E-01 | 3                  | 3.05E-01 | 2                  | 5.85E-01 | 2                  | 5.85E-01 | 1                  | 6.50E-01 | 1                  | 6.50E-01 |
| ZNF451   | 6   | 5                  | 7.84E-01 | 5                  | 7.84E-01 | 4                  | 5.85E-01 | 4                  | 5.85E-01 | 1                  | 6.41E-01 | 1                  | 6.41E-01 |
| NEUROD6  | 7   | 2                  | 5.70E-01 | 2                  | 5.70E-01 | 2                  | 5.85E-01 | 2                  | 5.85E-01 |                    |          |                    |          |
| CKAP5    | 11  | 4                  | 1.67E-01 | 4                  | 1.67E-01 | 4                  | 5.86E-01 | 4                  | 5.86E-01 |                    |          |                    |          |
| NPL      | 1   | 2                  | 9.05E-01 | 2                  | 9.05E-01 | 2                  | 5.86E-01 | 2                  | 5.86E-01 | 1                  | 6.52E-01 | 1                  | 6.52E-01 |
| AACS     | 12  | 2                  | 5.69E-01 | 2                  | 5.69E-01 | 2                  | 5.86E-01 | 2                  | 5.86E-01 |                    |          |                    |          |
| HK1      | 10  | 2                  | 5.68E-01 | 2                  | 5.68E-01 | 2                  | 5.86E-01 | 2                  | 5.86E-01 |                    |          |                    |          |
| RASAL1   | 12  | 3                  | 4.51E-01 | 4                  | 6.84E-01 | 2                  | 5.86E-01 | 3                  | 8.58E-01 | 1                  | 6.80E-01 | 2                  | 7.18E-01 |
| DGCR2    | 22  | 3                  | 4.23E-01 | 3                  | 4.23E-01 | 2                  | 5.86E-01 | 2                  | 5.86E-01 | 1                  | 6.32E-01 | 1                  | 6.32E-01 |
| PALB2    | 16  | 8                  | 4.99E-01 | 8                  | 4.99E-01 | 5                  | 1.00E+00 | 5                  | 1.00E+00 | 6                  | 5.87E-01 | 6                  | 5.87E-01 |
| ZNF471   | 19  | 4                  | 4.25E-01 | 4                  | 4.25E-01 | 3                  | 5.87E-01 | 3                  | 5.87E-01 | 3                  | 1.00E+00 | 3                  | 1.00E+00 |
| CNTN4    | 3   | 3                  | 7.24E-01 | 3                  | 7.24E-01 | 2                  | 5.87E-01 | 2                  | 5.87E-01 | 1                  | 6.46E-01 | 1                  | 6.46E-01 |
| ZBTB6    | 9   | 1                  | 7.52E-01 | 1                  | 7.52E-01 | 1                  | 5.87E-01 | 1                  | 5.87E-01 |                    |          |                    |          |
| WBP2NL   | 22  | 1                  | 7.52E-01 | 1                  | 7.52E-01 | 1                  | 5.87E-01 | 1                  | 5.87E-01 |                    |          |                    |          |
| GSTO2    | 10  | 1                  | 7.52E-01 | 1                  | 7.52E-01 | 1                  | 5.87E-01 | 1                  | 5.87E-01 |                    |          |                    |          |
| TRMT61A  | 14  | 1                  | 7.52E-01 | 1                  | 7.52E-01 | 1                  | 5.87E-01 | 1                  | 5.87E-01 |                    |          |                    |          |
| PNPLA6   | 19  | 2                  | 5.83E-01 | 2                  | 5.83E-01 | 2                  | 5.87E-01 | 2                  | 5.87E-01 |                    |          |                    |          |
| ARSB     | 5   | 3                  | 6.33E-01 | 3                  | 6.33E-01 | 2                  | 5.87E-01 | 2                  | 5.87E-01 | 1                  | 6.10E-01 | 1                  | 6.10E-01 |
| ZNF25    | 10  | 2                  | 5.53E-01 | 2                  | 5.53E-01 | 2                  | 5.87E-01 | 2                  | 5.87E-01 |                    |          |                    |          |
| NAPG     | 18  | 2                  | 2.47E-01 | 2                  | 2.47E-01 | 1                  | 1.00E+00 | 1                  | 1.00E+00 | 1                  | 5.88E-01 | 1                  | 5.88E-01 |
| ZNF189   | 9   | 1                  | 8.37E-02 | 1                  | 8.37E-02 |                    |          |                    |          | 1                  | 5.88E-01 | 1                  | 5.88E-01 |
| NTF3     | 12  | 1                  | 8.37E-02 | 1                  | 8.37E-02 |                    |          |                    |          | 1                  | 5.88E-01 | 1                  | 5.88E-01 |
| SPINT2   | 19  | 1                  | 8.37E-02 | 1                  | 8.37E-02 |                    |          |                    |          | 1                  | 5.88E-01 | 1                  | 5.88E-01 |
| MPI      | 15  | 1                  | 8.37E-02 | 1                  | 8.37E-02 |                    |          |                    |          | 1                  | 5.88E-01 | 1                  | 5.88E-01 |
| ADM2     | 22  | 1                  | 8.37E-02 | 1                  | 8.37E-02 |                    |          |                    |          | 1                  | 5.88E-01 | 1                  | 5.88E-01 |
| IL27     | 16  |                    |          | 1                  | 2.10E-01 |                    |          | 1                  | 5.88E-01 |                    |          | 1                  | 7.76E-01 |
| POLB     | 8   | 2                  | 5.67E-01 | 2                  | 5.67E-01 | 2                  | 5.88E-01 | 2                  | 5.88E-01 |                    |          |                    |          |
| POMT2    | 14  | 2                  | 5.76E-01 | 2                  | 5.76E-01 | 2                  | 5.88E-01 | 2                  | 5.88E-01 |                    |          |                    |          |
| CD109    | 6   | 11                 | 5.04E-01 | 11                 | 5.04E-01 | 8                  | 6.06E-01 | 8                  | 6.06E-01 | 7                  | 5.88E-01 | 7                  | 5.88E-01 |
| RPS6KA4  | 11  | 3                  | 2.39E-01 | 3                  | 2.39E-01 | 3                  | 5.88E-01 | 3                  | 5.88E-01 |                    |          |                    |          |
| GPR157   | 1   | 1                  | 1.07E-01 | 1                  | 1.07E-01 | 1                  | 1.00E+00 | 1                  | 1.00E+00 | 1                  | 5.89E-01 | 1                  | 5.89E-01 |
| TAS2R7   | 12  | 2                  | 7.82E-01 | 2                  | 7.82E-01 | 2                  | 1.00E+00 | 2                  | 1.00E+00 | 2                  | 5.89E-01 | 2                  | 5.89E-01 |
| ABCA13   | 7   | 35                 | 8.12E-01 | 35                 | 8.12E-01 | 31                 | 5.89E-01 | 31                 | 5.89E-01 | 20                 | 6.36E-01 | 20                 | 6.36E-01 |
| FGF5     | 4   | 5                  | 4.64E-01 | 5                  | 4.64E-01 | 3                  | 5.89E-01 | 3                  | 5.89E-01 | 2                  | 6.42E-01 | 2                  | 6.42E-01 |
| PRRS1L1  | 7   | 3                  | 4.63E-01 | 3                  | 4.63E-01 | 2                  | 5.89E-01 | 2                  | 5.89E-01 | 1                  | 6.18E-01 | 1                  | 6.18E-01 |
| NUFIP1   | 13  | 2                  | 5.80E-01 | 2                  | 5.80E-01 | 2                  | 5.89E-01 | 2                  | 5.89E-01 |                    |          |                    |          |
| PACS1    | 11  | 2                  | 5.82E-01 | 2                  | 5.82E-01 | 2                  | 5.89E-01 | 2                  | 5.89E-01 |                    |          |                    |          |
| ORC2     | 2   | 2                  | 5.88E-01 | 2                  | 5.88E-01 | 2                  | 5.90E-01 | 2                  | 5.90E-01 |                    |          |                    |          |
| ANLN     | 7   | 5                  | 7.02E-01 | 6                  | 4.56E-01 | 4                  | 5.90E-01 | 5                  | 8.92E-01 | 1                  | 6.08E-01 | 2                  | 6.27E-01 |



| SetID      | Chr | ADEH- vs NA        |          |                    |          | ADEH+ vs ADEH-     |          |                    |          | ADEH+ vs NA        |          |                    |          |
|------------|-----|--------------------|----------|--------------------|----------|--------------------|----------|--------------------|----------|--------------------|----------|--------------------|----------|
|            |     | rarenovel          |          | all                |          | rarenovel          |          | all                |          | rarenovel          |          | all                |          |
|            |     | N variants in test | p-value  | N variants in test | p-value  | N variants in test | p-value  | N variants in test | p-value  | N variants in test | p-value  | N variants in test | p-value  |
| UVSSA      | 4   | 3                  | 2.87E-01 | 3                  | 2.87E-01 | 2                  | 1.00E+00 | 2                  | 1.00E+00 | 3                  | 5.90E-01 | 3                  | 5.90E-01 |
| VPS51      | 11  | 2                  | 5.83E-01 | 2                  | 5.83E-01 | 2                  | 5.90E-01 | 2                  | 5.90E-01 |                    |          |                    |          |
| MT1B       | 16  | 1                  | 1.31E-01 | 1                  | 1.31E-01 | 1                  | 5.90E-01 | 1                  | 5.90E-01 | 1                  | 1.00E+00 | 1                  | 1.00E+00 |
| ACTL7A     | 9   | 5                  | 3.74E-01 | 5                  | 3.74E-01 | 4                  | 1.00E+00 | 4                  | 1.00E+00 | 4                  | 5.90E-01 | 4                  | 5.90E-01 |
| PDE9A      | 21  | 2                  | 5.74E-01 | 2                  | 5.74E-01 | 2                  | 5.90E-01 | 2                  | 5.90E-01 |                    |          |                    |          |
| ABHD18     | 4   | 2                  | 5.67E-01 | 2                  | 5.67E-01 | 2                  | 5.90E-01 | 2                  | 5.90E-01 |                    |          |                    |          |
| RANBP3L    | 5   | 4                  | 2.76E-01 | 4                  | 2.76E-01 | 2                  | 5.90E-01 | 2                  | 5.90E-01 | 2                  | 6.31E-01 | 2                  | 6.31E-01 |
| NGF        | 1   | 3                  | 7.78E-01 | 3                  | 7.78E-01 | 3                  | 5.90E-01 | 3                  | 5.90E-01 | 1                  | 7.61E-01 | 1                  | 7.61E-01 |
| PQLC1      | 18  | 2                  | 1.00E+00 | 2                  | 1.00E+00 | 2                  | 5.90E-01 | 2                  | 5.90E-01 | 1                  | 6.23E-01 | 1                  | 6.23E-01 |
| TNC        | 9   | 12                 | 6.68E-01 | 12                 | 6.68E-01 | 10                 | 5.90E-01 | 10                 | 5.90E-01 | 7                  | 6.54E-01 | 7                  | 6.54E-01 |
| PLEKHG6    | 12  | 3                  | 6.75E-01 | 3                  | 6.75E-01 | 2                  | 5.91E-01 | 2                  | 5.91E-01 | 2                  | 6.47E-01 | 2                  | 6.47E-01 |
| COL8A2     | 1   | 2                  | 6.48E-01 | 2                  | 6.48E-01 | 2                  | 5.91E-01 | 2                  | 5.91E-01 | 2                  | 6.57E-01 | 2                  | 6.57E-01 |
| TSR3       | 16  | 3                  | 3.16E-01 | 3                  | 3.16E-01 | 3                  | 5.91E-01 | 3                  | 5.91E-01 |                    |          |                    |          |
| SLC38A9    | 5   | 2                  | 5.78E-01 | 2                  | 5.78E-01 | 2                  | 5.91E-01 | 2                  | 5.91E-01 |                    |          |                    |          |
| GADD45GIP1 | 19  | 2                  | 5.67E-01 | 2                  | 5.67E-01 | 2                  | 5.91E-01 | 2                  | 5.91E-01 |                    |          |                    |          |
| VIL1       | 2   | 4                  | 7.83E-01 | 4                  | 7.83E-01 | 4                  | 5.91E-01 | 4                  | 5.91E-01 | 1                  | 6.43E-01 | 1                  | 6.43E-01 |
| C5orf34    | 5   | 3                  | 2.17E-01 | 3                  | 2.17E-01 | 3                  | 5.91E-01 | 3                  | 5.91E-01 |                    |          |                    |          |
| ANKRD50    | 4   | 3                  | 6.72E-01 | 3                  | 6.72E-01 | 2                  | 6.37E-01 | 2                  | 6.37E-01 | 1                  | 5.91E-01 | 1                  | 5.91E-01 |
| SORCS3     | 10  | 2                  | 5.78E-01 | 2                  | 5.78E-01 | 2                  | 5.92E-01 | 2                  | 5.92E-01 |                    |          |                    |          |
| SART3      | 12  | 3                  | 7.45E-01 | 3                  | 7.45E-01 | 2                  | 5.92E-01 | 2                  | 5.92E-01 | 1                  | 6.80E-01 | 1                  | 6.80E-01 |
| CHD9       | 16  | 4                  | 3.12E-01 | 4                  | 3.12E-01 | 2                  | 5.92E-01 | 2                  | 5.92E-01 | 2                  | 6.44E-01 | 2                  | 6.44E-01 |
| EFR3A      | 8   | 4                  | 8.18E-01 | 4                  | 8.18E-01 | 3                  | 6.81E-01 | 3                  | 6.81E-01 | 1                  | 5.92E-01 | 1                  | 5.92E-01 |
| ADAMTSL2   | 9   | 1                  | 7.71E-02 | 1                  | 7.71E-02 |                    |          |                    |          | 1                  | 5.92E-01 | 1                  | 5.92E-01 |
| TTYH3      | 7   | 1                  | 7.71E-02 | 1                  | 7.71E-02 |                    |          |                    |          | 1                  | 5.92E-01 | 1                  | 5.92E-01 |
| DIP2C      | 10  | 2                  | 1.00E+00 | 2                  | 1.00E+00 | 2                  | 6.54E-01 | 2                  | 6.54E-01 | 1                  | 5.92E-01 | 1                  | 5.92E-01 |
| BTNL9      | 5   | 2                  | 5.84E-01 | 2                  | 5.84E-01 | 2                  | 5.92E-01 | 2                  | 5.92E-01 |                    |          |                    |          |
| ACP5       | 19  | 1                  | 8.60E-02 | 2                  | 2.64E-01 |                    |          | 1                  | 5.92E-01 | 1                  | 5.93E-01 | 2                  | 6.56E-01 |
| MMP16      | 8   | 2                  | 5.76E-01 | 2                  | 5.76E-01 | 2                  | 5.92E-01 | 2                  | 5.92E-01 |                    |          |                    |          |
| FNDC9      | 5   | 2                  | 8.61E-01 | 2                  | 8.61E-01 | 2                  | 5.92E-01 | 2                  | 5.92E-01 | 1                  | 6.03E-01 | 1                  | 6.03E-01 |
| MRPS15     | 1   | 2                  | 5.76E-01 | 2                  | 5.76E-01 | 2                  | 5.92E-01 | 2                  | 5.92E-01 |                    |          |                    |          |
| PYROXD1    | 12  | 2                  | 5.74E-01 | 2                  | 5.74E-01 | 2                  | 5.92E-01 | 2                  | 5.92E-01 |                    |          |                    |          |
| LEO1       | 15  | 2                  | 5.74E-01 | 2                  | 5.74E-01 | 2                  | 5.92E-01 | 2                  | 5.92E-01 |                    |          |                    |          |
| TMEM55B    | 14  | 2                  | 9.09E-01 | 2                  | 9.09E-01 | 2                  | 6.12E-01 | 2                  | 6.12E-01 | 1                  | 5.92E-01 | 1                  | 5.92E-01 |
| SFMBT1     | 3   | 1                  | 6.65E-02 | 1                  | 6.65E-02 |                    |          |                    |          | 1                  | 5.92E-01 | 1                  | 5.92E-01 |
| CSDC2      | 22  | 1                  | 6.65E-02 | 1                  | 6.65E-02 |                    |          |                    |          | 1                  | 5.92E-01 | 1                  | 5.92E-01 |
| ZBED2      | 3   | 1                  | 6.65E-02 | 1                  | 6.65E-02 |                    |          |                    |          | 1                  | 5.92E-01 | 1                  | 5.92E-01 |
| PDZD3      | 11  | 1                  | 6.65E-02 | 1                  | 6.65E-02 |                    |          |                    |          | 1                  | 5.92E-01 | 1                  | 5.92E-01 |
| RFC1       | 4   | 3                  | 5.78E-01 | 3                  | 5.78E-01 | 2                  | 5.93E-01 | 2                  | 5.93E-01 | 1                  | 6.03E-01 | 1                  | 6.03E-01 |
| NPM2       | 8   | 1                  | 6.43E-02 | 1                  | 6.43E-02 |                    |          |                    |          | 1                  | 5.93E-01 | 1                  | 5.93E-01 |
| AHCTF1     | 1   | 2                  | 7.79E-01 | 2                  | 7.79E-01 | 2                  | 1.00E+00 | 2                  | 1.00E+00 | 1                  | 5.93E-01 | 1                  | 5.93E-01 |
| CSNK1G1    | 15  | 1                  | 6.43E-02 | 1                  | 6.43E-02 |                    |          |                    |          | 1                  | 5.93E-01 | 1                  | 5.93E-01 |
| ENOX1      | 13  | 1                  | 6.43E-02 | 1                  | 6.43E-02 |                    |          |                    |          | 1                  | 5.93E-01 | 1                  | 5.93E-01 |
| NDUFB4     | 3   | 1                  | 6.43E-02 | 1                  | 6.43E-02 |                    |          |                    |          | 1                  | 5.93E-01 | 1                  | 5.93E-01 |
| ATP2A2     | 12  | 1                  | 6.43E-02 | 1                  | 6.43E-02 |                    |          |                    |          | 1                  | 5.93E-01 | 1                  | 5.93E-01 |
| CD247      | 1   | 1                  | 6.43E-02 | 1                  | 6.43E-02 |                    |          |                    |          | 1                  | 5.93E-01 | 1                  | 5.93E-01 |
| TPD52L1    | 6   | 1                  | 6.43E-02 | 1                  | 6.43E-02 |                    |          |                    |          | 1                  | 5.93E-01 | 1                  | 5.93E-01 |
| GHDC       | 17  | 3                  | 2.24E-01 | 3                  | 2.24E-01 | 3                  | 5.93E-01 | 3                  | 5.93E-01 |                    |          |                    |          |
| RET        | 10  | 2                  | 5.66E-01 | 2                  | 5.66E-01 | 2                  | 5.93E-01 | 2                  | 5.93E-01 |                    |          |                    |          |

| SetID    | Chr | ADEH- vs NA        |          |                    |          | ADEH+ vs ADEH-     |          |                    |          | ADEH+ vs NA        |          |                    |          |
|----------|-----|--------------------|----------|--------------------|----------|--------------------|----------|--------------------|----------|--------------------|----------|--------------------|----------|
|          |     | rarenovel          |          | all                |          | rarenovel          |          | all                |          | rarenovel          |          | all                |          |
|          |     | N variants in test | p-value  | N variants in test | p-value  | N variants in test | p-value  | N variants in test | p-value  | N variants in test | p-value  | N variants in test | p-value  |
| UNKL     | 16  | 2                  | 8.08E-01 | 2                  | 8.08E-01 | 2                  | 5.93E-01 | 2                  | 5.93E-01 | 1                  | 6.35E-01 | 1                  | 6.35E-01 |
| NSUN7    | 4   | 3                  | 6.65E-01 | 3                  | 6.65E-01 | 2                  | 5.93E-01 | 2                  | 5.93E-01 | 1                  | 6.70E-01 | 1                  | 6.70E-01 |
| ANPEP    | 15  | 2                  | 1.00E+00 | 2                  | 1.00E+00 | 2                  | 5.93E-01 | 2                  | 5.93E-01 | 2                  | 6.48E-01 | 2                  | 6.48E-01 |
| NCSTN    | 1   | 2                  | 5.84E-01 | 2                  | 5.84E-01 | 2                  | 5.93E-01 | 2                  | 5.93E-01 |                    |          |                    |          |
| CFAP43   | 10  | 8                  | 5.98E-01 | 8                  | 5.98E-01 | 7                  | 5.93E-01 | 7                  | 5.93E-01 | 2                  | 7.80E-01 | 2                  | 7.80E-01 |
| STRN     | 2   | 1                  | 8.60E-02 | 1                  | 8.60E-02 |                    |          |                    |          | 1                  | 5.93E-01 | 1                  | 5.93E-01 |
| XPO4     | 13  | 1                  | 8.60E-02 | 1                  | 8.60E-02 |                    |          |                    |          | 1                  | 5.93E-01 | 1                  | 5.93E-01 |
| APOA1BP  | 1   | 1                  | 8.60E-02 | 1                  | 8.60E-02 |                    |          |                    |          | 1                  | 5.93E-01 | 1                  | 5.93E-01 |
| C22orf42 | 22  | 1                  | 8.60E-02 | 1                  | 8.60E-02 |                    |          |                    |          | 1                  | 5.93E-01 | 1                  | 5.93E-01 |
| STK40    | 1   | 1                  | 8.60E-02 | 1                  | 8.60E-02 |                    |          |                    |          | 1                  | 5.93E-01 | 1                  | 5.93E-01 |
| ALB      | 4   | 4                  | 8.47E-01 | 4                  | 8.47E-01 | 3                  | 7.59E-01 | 3                  | 7.59E-01 | 1                  | 5.93E-01 | 1                  | 5.93E-01 |
| NMD3     | 3   | 1                  | 8.60E-02 | 1                  | 8.60E-02 |                    |          |                    |          | 1                  | 5.93E-01 | 1                  | 5.93E-01 |
| UCKL1    | 20  | 1                  | 8.60E-02 | 1                  | 8.60E-02 |                    |          |                    |          | 1                  | 5.93E-01 | 1                  | 5.93E-01 |
| F2RL2    | 5   | 1                  | 8.60E-02 | 1                  | 8.60E-02 |                    |          |                    |          | 1                  | 5.93E-01 | 1                  | 5.93E-01 |
| FOPNL    | 16  | 1                  | 8.60E-02 | 1                  | 8.60E-02 |                    |          |                    |          | 1                  | 5.93E-01 | 1                  | 5.93E-01 |
| IRF7     | 11  | 2                  | 5.79E-01 | 2                  | 5.79E-01 | 2                  | 5.93E-01 | 2                  | 5.93E-01 |                    |          |                    |          |
| CDH2     | 18  |                    |          | 1                  | 4.29E-01 |                    |          | 1                  | 5.93E-01 |                    |          | 1                  | 1.00E+00 |
| RBM15    | 1   | 2                  | 5.74E-01 | 2                  | 5.74E-01 | 2                  | 5.93E-01 | 2                  | 5.93E-01 |                    |          |                    |          |
| LNPEP    | 5   | 2                  | 5.71E-01 | 2                  | 5.71E-01 | 2                  | 5.94E-01 | 2                  | 5.94E-01 |                    |          |                    |          |
| SLC7A6OS | 16  | 2                  | 3.11E-01 | 2                  | 3.11E-01 | 2                  | 5.94E-01 | 2                  | 5.94E-01 |                    |          |                    |          |
| C5orf28  | 5   | 2                  | 5.81E-01 | 2                  | 5.81E-01 | 2                  | 5.94E-01 | 2                  | 5.94E-01 |                    |          |                    |          |
| MROH1    | 8   | 3                  | 7.44E-01 | 3                  | 7.44E-01 | 2                  | 5.94E-01 | 2                  | 5.94E-01 | 1                  | 6.12E-01 | 1                  | 6.12E-01 |
| TTPA     | 8   | 2                  | 2.93E-01 | 2                  | 2.93E-01 | 2                  | 5.94E-01 | 2                  | 5.94E-01 |                    |          |                    |          |
| MYEF2    | 15  | 2                  | 5.75E-01 | 2                  | 5.75E-01 | 2                  | 5.94E-01 | 2                  | 5.94E-01 |                    |          |                    |          |
| FAM111A  | 11  | 3                  | 6.05E-01 | 3                  | 6.05E-01 | 2                  | 5.94E-01 | 2                  | 5.94E-01 | 1                  | 6.47E-01 | 1                  | 6.47E-01 |
| SLC26A5  | 7   | 3                  | 6.80E-01 | 3                  | 6.80E-01 | 2                  | 5.94E-01 | 2                  | 5.94E-01 | 1                  | 6.28E-01 | 1                  | 6.28E-01 |
| SLC32A1  | 20  | 1                  | 6.54E-02 | 1                  | 6.54E-02 |                    |          |                    |          | 1                  | 5.95E-01 | 1                  | 5.95E-01 |
| MRPL12   | 17  | 1                  | 6.54E-02 | 1                  | 6.54E-02 |                    |          |                    |          | 1                  | 5.95E-01 | 1                  | 5.95E-01 |
| C16orf71 | 16  | 1                  | 6.54E-02 | 1                  | 6.54E-02 |                    |          |                    |          | 1                  | 5.95E-01 | 1                  | 5.95E-01 |
| BCL2L15  | 1   | 1                  | 6.54E-02 | 1                  | 6.54E-02 |                    |          |                    |          | 1                  | 5.95E-01 | 1                  | 5.95E-01 |
| SH3PXD2B | 5   | 2                  | 5.67E-01 | 2                  | 5.67E-01 | 2                  | 5.95E-01 | 2                  | 5.95E-01 |                    |          |                    |          |
| PARVG    | 22  | 2                  | 1.00E+00 | 2                  | 1.00E+00 | 2                  | 5.95E-01 | 2                  | 5.95E-01 | 1                  | 6.55E-01 | 1                  | 6.55E-01 |
| FAM45A   | 10  | 2                  | 3.23E-01 | 2                  | 3.23E-01 | 2                  | 5.95E-01 | 2                  | 5.95E-01 |                    |          |                    |          |
| PLPP4    | 10  | 2                  | 5.83E-01 | 2                  | 5.83E-01 | 2                  | 5.95E-01 | 2                  | 5.95E-01 |                    |          |                    |          |
| GALK1    | 17  | 3                  | 7.14E-01 | 3                  | 7.14E-01 | 2                  | 5.95E-01 | 2                  | 5.95E-01 | 1                  | 6.92E-01 | 1                  | 6.92E-01 |
| ZNF160   | 19  | 4                  | 2.20E-01 | 4                  | 2.20E-01 | 4                  | 5.96E-01 | 4                  | 5.96E-01 |                    |          |                    |          |
| YIPF3    | 6   | 2                  | 5.78E-01 | 2                  | 5.78E-01 | 2                  | 5.96E-01 | 2                  | 5.96E-01 |                    |          |                    |          |
| LRRC61   | 7   | 2                  | 5.90E-01 | 2                  | 5.90E-01 | 2                  | 5.96E-01 | 2                  | 5.96E-01 |                    |          |                    |          |
| TRPV2    | 17  | 2                  | 1.00E+00 | 2                  | 1.00E+00 | 2                  | 5.96E-01 | 2                  | 5.96E-01 | 1                  | 6.10E-01 | 1                  | 6.10E-01 |
| TRIP4    | 15  | 3                  | 2.18E-01 | 3                  | 2.18E-01 | 3                  | 5.96E-01 | 3                  | 5.96E-01 |                    |          |                    |          |
| NRXN2    | 11  | 2                  | 9.23E-01 | 2                  | 9.23E-01 | 2                  | 5.96E-01 | 2                  | 5.96E-01 | 1                  | 6.10E-01 | 1                  | 6.10E-01 |
| DLL1     | 6   | 3                  | 6.63E-01 | 3                  | 6.63E-01 | 2                  | 5.96E-01 | 2                  | 5.96E-01 | 1                  | 6.06E-01 | 1                  | 6.06E-01 |
| PUM1     | 1   | 2                  | 5.77E-01 | 2                  | 5.77E-01 | 2                  | 5.96E-01 | 2                  | 5.96E-01 |                    |          |                    |          |
| EFR3B    | 2   | 3                  | 7.23E-01 | 3                  | 7.23E-01 | 2                  | 5.96E-01 | 2                  | 5.96E-01 | 1                  | 6.48E-01 | 1                  | 6.48E-01 |
| CLIC5    | 6   | 3                  | 5.10E-01 | 3                  | 5.10E-01 | 3                  | 1.00E+00 | 3                  | 1.00E+00 | 2                  | 5.96E-01 | 2                  | 5.96E-01 |
| OR52K2   | 11  | 3                  | 1.19E-01 | 3                  | 1.19E-01 | 3                  | 1.00E+00 | 3                  | 1.00E+00 | 2                  | 5.96E-01 | 2                  | 5.96E-01 |
| RAD23A   | 19  | 2                  | 3.16E-01 | 2                  | 3.16E-01 | 2                  | 5.97E-01 | 2                  | 5.97E-01 |                    |          |                    |          |
| BTN3A2   | 6   | 2                  | 6.41E-01 | 2                  | 6.41E-01 | 2                  | 5.97E-01 | 2                  | 5.97E-01 | 2                  | 6.33E-01 | 2                  | 6.33E-01 |

| SetID     | Chr | ADEH- vs NA        |          |                    |          | ADEH+ vs ADEH-     |          |                    |          | ADEH+ vs NA        |          |                    |          |
|-----------|-----|--------------------|----------|--------------------|----------|--------------------|----------|--------------------|----------|--------------------|----------|--------------------|----------|
|           |     | rarenovel          |          | all                |          | rarenovel          |          | all                |          | rarenovel          |          | all                |          |
|           |     | N variants in test | p-value  | N variants in test | p-value  | N variants in test | p-value  | N variants in test | p-value  | N variants in test | p-value  | N variants in test | p-value  |
| SNX1      | 15  | 2                  | 5.62E-01 | 2                  | 5.62E-01 | 2                  | 5.97E-01 | 2                  | 5.97E-01 |                    |          |                    |          |
| DNAH8     | 6   | 29                 | 7.93E-01 | 30                 | 7.97E-01 | 22                 | 6.02E-01 | 23                 | 5.97E-01 | 15                 | 7.75E-01 | 16                 | 7.59E-01 |
| DYNC2LI1  | 2   | 4                  | 3.31E-01 | 4                  | 3.31E-01 | 2                  | 6.01E-01 | 2                  | 6.01E-01 | 2                  | 5.97E-01 | 2                  | 5.97E-01 |
| KHDRBS2   | 6   | 2                  | 5.78E-01 | 2                  | 5.78E-01 | 2                  | 5.97E-01 | 2                  | 5.97E-01 |                    |          |                    |          |
| ZNF557    | 19  | 3                  | 6.32E-01 | 3                  | 6.32E-01 | 2                  | 5.97E-01 | 2                  | 5.97E-01 | 1                  | 6.41E-01 | 1                  | 6.41E-01 |
| JTB       | 1   | 2                  | 3.25E-01 | 2                  | 3.25E-01 | 2                  | 5.97E-01 | 2                  | 5.97E-01 |                    |          |                    |          |
| MAP1B     | 5   | 3                  | 6.72E-01 | 3                  | 6.72E-01 | 2                  | 5.97E-01 | 2                  | 5.97E-01 | 1                  | 5.99E-01 | 1                  | 5.99E-01 |
| COL3A1    | 2   | 3                  | 1.00E+00 | 3                  | 1.00E+00 | 3                  | 5.98E-01 | 3                  | 5.98E-01 | 2                  | 6.35E-01 | 2                  | 6.35E-01 |
| CRHBP     | 5   | 2                  | 5.64E-01 | 2                  | 5.64E-01 | 2                  | 5.98E-01 | 2                  | 5.98E-01 |                    |          |                    |          |
| PSME4     | 2   | 2                  | 5.82E-01 | 2                  | 5.82E-01 | 2                  | 5.98E-01 | 2                  | 5.98E-01 |                    |          |                    |          |
| ZBTB41    | 1   | 2                  | 5.64E-01 | 2                  | 5.64E-01 | 2                  | 5.98E-01 | 2                  | 5.98E-01 |                    |          |                    |          |
| KCNQ1     | 11  | 2                  | 5.70E-01 | 2                  | 5.70E-01 | 2                  | 5.98E-01 | 2                  | 5.98E-01 |                    |          |                    |          |
| GEM       | 8   | 1                  | 6.39E-02 | 1                  | 6.39E-02 |                    |          |                    |          | 1                  | 5.98E-01 | 1                  | 5.98E-01 |
| LTA4H     | 12  | 4                  | 7.70E-01 | 4                  | 7.70E-01 | 3                  | 7.32E-01 | 3                  | 7.32E-01 | 1                  | 5.98E-01 | 1                  | 5.98E-01 |
| CPNE2     | 16  | 1                  | 6.39E-02 | 1                  | 6.39E-02 |                    |          |                    |          | 1                  | 5.98E-01 | 1                  | 5.98E-01 |
| FBXO25    | 8   | 1                  | 6.39E-02 | 1                  | 6.39E-02 |                    |          |                    |          | 1                  | 5.98E-01 | 1                  | 5.98E-01 |
| NUDT14    | 14  | 3                  | 6.81E-01 | 3                  | 6.81E-01 | 2                  | 5.98E-01 | 2                  | 5.98E-01 | 1                  | 5.99E-01 | 1                  | 5.99E-01 |
| SGOL1     | 3   | 1                  | 8.67E-02 | 1                  | 8.67E-02 |                    |          |                    |          | 1                  | 5.98E-01 | 1                  | 5.98E-01 |
| ARHGEF33  | 2   | 1                  | 8.67E-02 | 1                  | 8.67E-02 |                    |          |                    |          | 1                  | 5.98E-01 | 1                  | 5.98E-01 |
| ZBTB47    | 3   | 1                  | 8.67E-02 | 1                  | 8.67E-02 |                    |          |                    |          | 1                  | 5.98E-01 | 1                  | 5.98E-01 |
| ECSIT     | 19  | 1                  | 8.05E-01 | 1                  | 8.05E-01 | 1                  | 1.00E+00 | 1                  | 1.00E+00 | 1                  | 5.98E-01 | 1                  | 5.98E-01 |
| CD19      | 16  | 2                  | 9.10E-01 | 2                  | 9.10E-01 | 2                  | 5.98E-01 | 2                  | 5.98E-01 | 1                  | 6.33E-01 | 1                  | 6.33E-01 |
| TMEM128   | 4   | 1                  | 8.37E-02 | 1                  | 8.37E-02 |                    |          |                    |          | 1                  | 5.98E-01 | 1                  | 5.98E-01 |
| DAB2      | 5   | 3                  | 7.08E-01 | 3                  | 7.08E-01 | 2                  | 6.43E-01 | 2                  | 6.43E-01 | 1                  | 5.98E-01 | 1                  | 5.98E-01 |
| C6orf47   | 6   | 1                  | 7.61E-01 | 2                  | 8.32E-01 | 1                  | 1.00E+00 | 2                  | 1.00E+00 | 1                  | 5.98E-01 | 2                  | 6.58E-01 |
| EPHA7     | 6   | 3                  | 6.96E-01 | 3                  | 6.96E-01 | 2                  | 6.37E-01 | 2                  | 6.37E-01 | 1                  | 5.98E-01 | 1                  | 5.98E-01 |
| FAM83D    | 20  | 3                  | 6.63E-01 | 3                  | 6.63E-01 | 2                  | 5.98E-01 | 2                  | 5.98E-01 | 1                  | 6.44E-01 | 1                  | 6.44E-01 |
| SPHK2     | 19  | 5                  | 7.59E-01 | 5                  | 7.59E-01 | 4                  | 5.98E-01 | 4                  | 5.98E-01 | 1                  | 6.31E-01 | 1                  | 6.31E-01 |
| RCBTB1    | 13  | 1                  | 8.45E-02 | 1                  | 8.45E-02 |                    |          |                    |          | 1                  | 5.98E-01 | 1                  | 5.98E-01 |
| OR2M7     | 1   | 2                  | 9.24E-01 | 3                  | 9.24E-01 | 2                  | 6.61E-01 | 3                  | 6.41E-01 | 1                  | 5.98E-01 | 2                  | 6.03E-01 |
| TAF11     | 6   | 1                  | 8.45E-02 | 1                  | 8.45E-02 |                    |          |                    |          | 1                  | 5.98E-01 | 1                  | 5.98E-01 |
| DUSP19    | 2   | 1                  | 8.45E-02 | 1                  | 8.45E-02 |                    |          |                    |          | 1                  | 5.98E-01 | 1                  | 5.98E-01 |
| ZNF852    | 3   | 2                  | 5.82E-01 | 2                  | 5.82E-01 | 2                  | 5.98E-01 | 2                  | 5.98E-01 |                    |          |                    |          |
| MYH10     | 17  | 2                  | 5.74E-01 | 2                  | 5.74E-01 | 2                  | 5.98E-01 | 2                  | 5.98E-01 |                    |          |                    |          |
| NTNG1     | 1   | 2                  | 5.76E-01 | 2                  | 5.76E-01 | 2                  | 5.98E-01 | 2                  | 5.98E-01 |                    |          |                    |          |
| SLC18A1   | 8   | 2                  | 5.74E-01 | 2                  | 5.74E-01 | 2                  | 5.98E-01 | 2                  | 5.98E-01 |                    |          |                    |          |
| HECW2     | 2   | 2                  | 5.78E-01 | 2                  | 5.78E-01 | 2                  | 5.98E-01 | 2                  | 5.98E-01 |                    |          |                    |          |
| VPS18     | 15  | 8                  | 2.04E-01 | 8                  | 2.04E-01 | 7                  | 5.98E-01 | 7                  | 5.98E-01 | 3                  | 1.00E+00 | 3                  | 1.00E+00 |
| SLC16A4   | 1   | 2                  | 5.59E-01 | 2                  | 5.59E-01 | 2                  | 5.99E-01 | 2                  | 5.99E-01 |                    |          |                    |          |
| PCSK7     | 11  | 3                  | 8.60E-01 | 3                  | 8.60E-01 | 2                  | 5.99E-01 | 2                  | 5.99E-01 | 2                  | 6.45E-01 | 2                  | 6.45E-01 |
| CEACAM5   | 19  | 2                  | 3.25E-01 | 2                  | 3.25E-01 | 2                  | 5.99E-01 | 2                  | 5.99E-01 |                    |          |                    |          |
| ARHGEF10L | 1   | 3                  | 8.42E-01 | 4                  | 4.52E-01 | 2                  | 5.99E-01 | 3                  | 1.00E+00 | 2                  | 6.40E-01 | 3                  | 8.48E-01 |
| PHTF1     | 1   | 3                  | 5.27E-01 | 3                  | 5.27E-01 | 2                  | 5.99E-01 | 2                  | 5.99E-01 | 1                  | 6.17E-01 | 1                  | 6.17E-01 |
| ADAMTS10  | 19  | 3                  | 6.61E-01 | 3                  | 6.61E-01 | 2                  | 5.99E-01 | 2                  | 5.99E-01 | 1                  | 6.43E-01 | 1                  | 6.43E-01 |
| CSPG4     | 15  | 2                  | 3.23E-01 | 2                  | 3.23E-01 | 2                  | 5.99E-01 | 2                  | 5.99E-01 |                    |          |                    |          |
| SLC2A8    | 9   | 2                  | 9.16E-01 | 2                  | 9.16E-01 | 2                  | 5.99E-01 | 2                  | 5.99E-01 | 1                  | 6.34E-01 | 1                  | 6.34E-01 |
| WDR75     | 2   | 4                  | 6.00E-01 | 4                  | 6.00E-01 | 3                  | 5.99E-01 | 3                  | 5.99E-01 | 1                  | 6.06E-01 | 1                  | 6.06E-01 |
| ZSCAN4    | 19  | 1                  | 7.38E-02 | 1                  | 7.38E-02 |                    |          |                    |          | 1                  | 5.99E-01 | 1                  | 5.99E-01 |

| SetID    | Chr | ADEH- vs NA        |          |                    |          | ADEH+ vs ADEH-     |          |                    |          | ADEH+ vs NA        |          |                    |          |
|----------|-----|--------------------|----------|--------------------|----------|--------------------|----------|--------------------|----------|--------------------|----------|--------------------|----------|
|          |     | rare novel         |          | all                |          | rare novel         |          | all                |          | rare novel         |          | all                |          |
|          |     | N variants in test | p-value  | N variants in test | p-value  | N variants in test | p-value  | N variants in test | p-value  | N variants in test | p-value  | N variants in test | p-value  |
| TYW3     | 1   | 1                  | 7.38E-02 | 1                  | 7.38E-02 |                    |          |                    |          | 1                  | 5.99E-01 | 1                  | 5.99E-01 |
| PRDM12   | 9   | 1                  | 7.38E-02 | 1                  | 7.38E-02 |                    |          |                    |          | 1                  | 5.99E-01 | 1                  | 5.99E-01 |
| ANAPC15  | 11  | 1                  | 7.38E-02 | 1                  | 7.38E-02 |                    |          |                    |          | 1                  | 5.99E-01 | 1                  | 5.99E-01 |
| HOMER1   | 5   | 1                  | 7.38E-02 | 1                  | 7.38E-02 |                    |          |                    |          | 1                  | 5.99E-01 | 1                  | 5.99E-01 |
| GPT2     | 16  | 1                  | 7.38E-02 | 1                  | 7.38E-02 |                    |          |                    |          | 1                  | 5.99E-01 | 1                  | 5.99E-01 |
| MTERF3   | 8   | 4                  | 7.95E-01 | 4                  | 7.95E-01 | 3                  | 6.64E-01 | 3                  | 6.64E-01 | 1                  | 5.99E-01 | 1                  | 5.99E-01 |
| CNN1     | 19  | 1                  | 7.38E-02 | 1                  | 7.38E-02 |                    |          |                    |          | 1                  | 5.99E-01 | 1                  | 5.99E-01 |
| KLF12    | 13  | 1                  | 7.38E-02 | 1                  | 7.38E-02 |                    |          |                    |          | 1                  | 5.99E-01 | 1                  | 5.99E-01 |
| MARVELD3 | 16  | 2                  | 1.00E+00 | 2                  | 1.00E+00 | 2                  | 6.17E-01 | 2                  | 6.17E-01 | 1                  | 5.99E-01 | 1                  | 5.99E-01 |
| SEMA3C   | 7   | 4                  | 8.64E-01 | 4                  | 8.64E-01 | 4                  | 1.00E+00 | 4                  | 1.00E+00 | 2                  | 5.99E-01 | 2                  | 5.99E-01 |
| CALR3    | 19  | 2                  | 5.69E-01 | 2                  | 5.69E-01 | 2                  | 6.00E-01 | 2                  | 6.00E-01 |                    |          |                    |          |
| APBB2    | 4   | 2                  | 5.45E-01 | 2                  | 5.45E-01 | 2                  | 6.00E-01 | 2                  | 6.00E-01 |                    |          |                    |          |
| PRICKLE1 | 12  | 2                  | 5.83E-01 | 2                  | 5.83E-01 | 2                  | 6.00E-01 | 2                  | 6.00E-01 |                    |          |                    |          |
| ZNF23    | 16  | 4                  | 3.85E-01 | 4                  | 3.85E-01 | 2                  | 6.00E-01 | 2                  | 6.00E-01 | 2                  | 6.29E-01 | 2                  | 6.29E-01 |
| ELFN1    | 7   | 3                  | 6.57E-01 | 3                  | 6.57E-01 | 2                  | 6.00E-01 | 2                  | 6.00E-01 | 1                  | 6.45E-01 | 1                  | 6.45E-01 |
| SLC22A17 | 14  | 2                  | 9.04E-01 | 2                  | 9.04E-01 | 2                  | 6.00E-01 | 2                  | 6.00E-01 | 1                  | 6.51E-01 | 1                  | 6.51E-01 |
| ZNF678   | 1   | 2                  | 1.41E-01 | 2                  | 1.41E-01 | 1                  | 1.00E+00 | 1                  | 1.00E+00 | 2                  | 6.00E-01 | 2                  | 6.00E-01 |
| SERINC2  | 1   | 4                  | 1.90E-01 | 4                  | 1.90E-01 | 4                  | 6.00E-01 | 4                  | 6.00E-01 |                    |          |                    |          |
| LRRN3    | 7   | 3                  | 7.68E-01 | 3                  | 7.68E-01 | 3                  | 6.00E-01 | 3                  | 6.00E-01 | 1                  | 6.33E-01 | 1                  | 6.33E-01 |
| PROX2    | 14  | 3                  | 6.31E-01 | 3                  | 6.31E-01 | 2                  | 6.73E-01 | 2                  | 6.73E-01 | 1                  | 6.00E-01 | 1                  | 6.00E-01 |
| NYNRIN   | 14  | 1                  | 8.01E-02 | 1                  | 8.01E-02 |                    |          |                    |          | 1                  | 6.00E-01 | 1                  | 6.00E-01 |
| RINT1    | 7   | 2                  | 8.83E-01 | 2                  | 8.83E-01 | 2                  | 7.69E-01 | 2                  | 7.69E-01 | 1                  | 6.00E-01 | 1                  | 6.00E-01 |
| RCCD1    | 15  | 3                  | 7.31E-01 | 3                  | 7.31E-01 | 3                  | 8.07E-01 | 3                  | 8.07E-01 | 1                  | 6.00E-01 | 1                  | 6.00E-01 |
| MTCH1    | 6   | 1                  | 8.01E-02 | 1                  | 8.01E-02 |                    |          |                    |          | 1                  | 6.00E-01 | 1                  | 6.00E-01 |
| AGFG1    | 2   | 1                  | 8.01E-02 | 1                  | 8.01E-02 |                    |          |                    |          | 1                  | 6.00E-01 | 1                  | 6.00E-01 |
| KIAA0368 | 9   | 1                  | 8.01E-02 | 1                  | 8.01E-02 |                    |          |                    |          | 1                  | 6.00E-01 | 1                  | 6.00E-01 |
| MCMDC2   | 8   | 1                  | 8.01E-02 | 1                  | 8.01E-02 |                    |          |                    |          | 1                  | 6.00E-01 | 1                  | 6.00E-01 |
| RNF14    | 5   | 1                  | 8.01E-02 | 1                  | 8.01E-02 |                    |          |                    |          | 1                  | 6.00E-01 | 1                  | 6.00E-01 |
| ALK      | 2   | 4                  | 2.68E-01 | 4                  | 2.68E-01 | 2                  | 6.00E-01 | 2                  | 6.00E-01 | 2                  | 6.43E-01 | 2                  | 6.43E-01 |
| ARSK     | 5   | 4                  | 7.76E-01 | 4                  | 7.76E-01 | 4                  | 8.49E-01 | 4                  | 8.49E-01 | 1                  | 6.00E-01 | 1                  | 6.00E-01 |
| SLC7A1   | 13  | 1                  | 7.96E-02 | 1                  | 7.96E-02 |                    |          |                    |          | 1                  | 6.00E-01 | 1                  | 6.00E-01 |
| WIPF2    | 17  | 1                  | 7.96E-02 | 1                  | 7.96E-02 |                    |          |                    |          | 1                  | 6.00E-01 | 1                  | 6.00E-01 |
| HOXB9    | 17  | 3                  | 9.08E-01 | 3                  | 9.08E-01 | 3                  | 6.38E-01 | 3                  | 6.38E-01 | 1                  | 6.00E-01 | 1                  | 6.00E-01 |
| RNF8     | 6   | 1                  | 7.96E-02 | 1                  | 7.96E-02 |                    |          |                    |          | 1                  | 6.00E-01 | 1                  | 6.00E-01 |
| SCAI     | 9   | 1                  | 7.96E-02 | 1                  | 7.96E-02 |                    |          |                    |          | 1                  | 6.00E-01 | 1                  | 6.00E-01 |
| FAM160B1 | 10  | 1                  | 7.96E-02 | 1                  | 7.96E-02 |                    |          |                    |          | 1                  | 6.00E-01 | 1                  | 6.00E-01 |
| AGBL4    | 1   | 1                  | 7.96E-02 | 1                  | 7.96E-02 |                    |          |                    |          | 1                  | 6.00E-01 | 1                  | 6.00E-01 |
| BOK      | 2   | 2                  | 4.00E-01 | 2                  | 4.00E-01 | 3                  | 6.00E-01 | 3                  | 6.00E-01 | 2                  | 7.24E-01 | 2                  | 7.24E-01 |
| ZNF324B  | 19  | 2                  | 5.82E-01 | 2                  | 5.82E-01 | 2                  | 6.00E-01 | 2                  | 6.00E-01 |                    |          |                    |          |
| MFAP2    | 1   | 2                  | 5.77E-01 | 2                  | 5.77E-01 | 2                  | 6.00E-01 | 2                  | 6.00E-01 |                    |          |                    |          |
| ALS2CR12 | 2   | 2                  | 5.67E-01 | 2                  | 5.67E-01 | 2                  | 6.00E-01 | 2                  | 6.00E-01 |                    |          |                    |          |
| THAP9    | 4   | 2                  | 5.73E-01 | 2                  | 5.73E-01 | 2                  | 6.00E-01 | 2                  | 6.00E-01 |                    |          |                    |          |
| YOD1     | 1   | 2                  | 9.16E-01 | 2                  | 9.16E-01 | 2                  | 6.00E-01 | 2                  | 6.00E-01 | 1                  | 6.33E-01 | 1                  | 6.33E-01 |
| LRRRC39  | 1   | 3                  | 6.39E-01 | 3                  | 6.39E-01 | 2                  | 6.01E-01 | 2                  | 6.01E-01 | 2                  | 6.41E-01 | 2                  | 6.41E-01 |
| C7orf55  | 7   | 1                  | 7.17E-02 | 1                  | 7.17E-02 |                    |          |                    |          | 1                  | 6.01E-01 | 1                  | 6.01E-01 |
| PTPRF    | 1   | 3                  | 6.47E-01 | 3                  | 6.47E-01 | 2                  | 6.07E-01 | 2                  | 6.07E-01 | 1                  | 6.01E-01 | 1                  | 6.01E-01 |
| HYLS1    | 11  | 3                  | 6.01E-01 | 3                  | 6.01E-01 | 2                  | 6.38E-01 | 2                  | 6.38E-01 | 1                  | 6.01E-01 | 1                  | 6.01E-01 |
| RAB3B    | 1   | 3                  | 6.47E-01 | 3                  | 6.47E-01 | 2                  | 6.48E-01 | 2                  | 6.48E-01 | 1                  | 6.01E-01 | 1                  | 6.01E-01 |

| SetID    | Chr | ADEH- vs NA        |          |                    |          | ADEH+ vs ADEH-     |          |                    |          | ADEH+ vs NA        |          |                    |          |
|----------|-----|--------------------|----------|--------------------|----------|--------------------|----------|--------------------|----------|--------------------|----------|--------------------|----------|
|          |     | rare novel         |          | all                |          | rare novel         |          | all                |          | rare novel         |          | all                |          |
|          |     | N variants in test | p-value  | N variants in test | p-value  | N variants in test | p-value  | N variants in test | p-value  | N variants in test | p-value  | N variants in test | p-value  |
| POLR2D   | 2   | 1                  | 7.17E-02 | 1                  | 7.17E-02 |                    |          |                    |          | 1                  | 6.01E-01 | 1                  | 6.01E-01 |
| IL1A     | 2   | 2                  | 9.14E-01 | 2                  | 9.14E-01 | 2                  | 6.19E-01 | 2                  | 6.19E-01 | 1                  | 6.01E-01 | 1                  | 6.01E-01 |
| SMDT1    | 22  | 2                  | 3.18E-01 | 2                  | 3.18E-01 | 2                  | 6.01E-01 | 2                  | 6.01E-01 |                    |          |                    |          |
| ZFP28    | 19  | 1                  | 6.67E-02 | 1                  | 6.67E-02 |                    |          |                    |          | 1                  | 6.01E-01 | 1                  | 6.01E-01 |
| HMGCLL1  | 6   | 1                  | 6.67E-02 | 1                  | 6.67E-02 |                    |          |                    |          | 1                  | 6.01E-01 | 1                  | 6.01E-01 |
| MPRIP    | 17  | 3                  | 6.34E-01 | 3                  | 6.34E-01 | 2                  | 6.33E-01 | 2                  | 6.33E-01 | 1                  | 6.01E-01 | 1                  | 6.01E-01 |
| KIAA0319 | 6   | 5                  | 8.28E-01 | 5                  | 8.28E-01 | 4                  | 6.36E-01 | 4                  | 6.36E-01 | 1                  | 6.01E-01 | 1                  | 6.01E-01 |
| OTOGL    | 12  | 2                  | 5.79E-01 | 2                  | 5.79E-01 | 2                  | 6.01E-01 | 2                  | 6.01E-01 |                    |          |                    |          |
| MGAT4D   | 4   | 1                  | 4.22E-01 | 1                  | 4.22E-01 | 1                  | 6.01E-01 | 1                  | 6.01E-01 | 1                  | 1.00E+00 | 1                  | 1.00E+00 |
| F7       | 13  | 2                  | 5.71E-01 | 2                  | 5.71E-01 | 2                  | 6.01E-01 | 2                  | 6.01E-01 |                    |          |                    |          |
| SLC6A2   | 16  | 1                  | 7.20E-02 | 1                  | 7.20E-02 |                    |          |                    |          | 1                  | 6.01E-01 | 1                  | 6.01E-01 |
| C9orf3   | 9   | 4                  | 8.00E-01 | 4                  | 8.00E-01 | 3                  | 6.95E-01 | 3                  | 6.95E-01 | 1                  | 6.01E-01 | 1                  | 6.01E-01 |
| WDR63    | 1   | 1                  | 7.20E-02 | 1                  | 7.20E-02 |                    |          |                    |          | 1                  | 6.01E-01 | 1                  | 6.01E-01 |
| PPIL4    | 6   | 2                  | 5.23E-01 | 2                  | 5.23E-01 | 2                  | 6.01E-01 | 2                  | 6.01E-01 |                    |          |                    |          |
| AGPAT5   | 8   | 2                  | 5.73E-01 | 2                  | 5.73E-01 | 2                  | 6.01E-01 | 2                  | 6.01E-01 |                    |          |                    |          |
| DNAJB14  | 4   | 2                  | 5.85E-01 | 2                  | 5.85E-01 | 2                  | 6.01E-01 | 2                  | 6.01E-01 |                    |          |                    |          |
| ACY3     | 11  | 3                  | 2.02E-01 | 3                  | 2.02E-01 | 3                  | 6.01E-01 | 3                  | 6.01E-01 |                    |          |                    |          |
| THSD7A   | 7   | 3                  | 3.34E-01 | 4                  | 3.34E-01 | 3                  | 6.16E-01 | 4                  | 6.16E-01 |                    |          | 1                  | 6.01E-01 |
| DAND5    | 19  | 1                  | 6.75E-02 | 1                  | 6.75E-02 |                    |          |                    |          | 1                  | 6.01E-01 | 1                  | 6.01E-01 |
| SLC25A13 | 7   | 4                  | 3.33E-01 | 4                  | 3.33E-01 | 3                  | 1.00E+00 | 3                  | 1.00E+00 | 1                  | 6.01E-01 | 1                  | 6.01E-01 |
| TC2N     | 14  | 1                  | 6.75E-02 | 1                  | 6.75E-02 |                    |          |                    |          | 1                  | 6.01E-01 | 1                  | 6.01E-01 |
| ISYNA1   | 19  | 1                  | 6.75E-02 | 1                  | 6.75E-02 |                    |          |                    |          | 1                  | 6.01E-01 | 1                  | 6.01E-01 |
| DLGAP4   | 20  | 4                  | 7.73E-01 | 4                  | 7.73E-01 | 3                  | 7.86E-01 | 3                  | 7.86E-01 | 1                  | 6.01E-01 | 1                  | 6.01E-01 |
| P4HA2    | 5   | 3                  | 6.40E-01 | 3                  | 6.40E-01 | 2                  | 6.44E-01 | 2                  | 6.44E-01 | 1                  | 6.01E-01 | 1                  | 6.01E-01 |
| LRFN4    | 11  | 4                  | 6.07E-01 | 4                  | 6.07E-01 | 3                  | 7.97E-01 | 3                  | 7.97E-01 | 1                  | 6.01E-01 | 1                  | 6.01E-01 |
| SDCBP    | 8   | 1                  | 6.75E-02 | 1                  | 6.75E-02 |                    |          |                    |          | 1                  | 6.01E-01 | 1                  | 6.01E-01 |
| NDUFAF5  | 20  | 1                  | 6.75E-02 | 1                  | 6.75E-02 |                    |          |                    |          | 1                  | 6.01E-01 | 1                  | 6.01E-01 |
| HOXB13   | 17  | 1                  | 8.74E-01 | 1                  | 8.74E-01 | 1                  | 1.00E+00 | 1                  | 1.00E+00 | 1                  | 6.01E-01 | 1                  | 6.01E-01 |
| CDON     | 11  | 5                  | 5.91E-01 | 5                  | 5.91E-01 | 4                  | 6.01E-01 | 4                  | 6.01E-01 | 1                  | 6.17E-01 | 1                  | 6.17E-01 |
| EREG     | 4   | 2                  | 5.30E-01 | 2                  | 5.30E-01 | 2                  | 6.02E-01 | 2                  | 6.02E-01 |                    |          |                    |          |
| STAT5B   | 17  | 2                  | 5.71E-01 | 2                  | 5.71E-01 | 2                  | 6.02E-01 | 2                  | 6.02E-01 |                    |          |                    |          |
| RGS14    | 5   | 2                  | 5.72E-01 | 2                  | 5.72E-01 | 2                  | 6.02E-01 | 2                  | 6.02E-01 |                    |          |                    |          |
| GPR87    | 3   | 2                  | 5.83E-01 | 2                  | 5.83E-01 | 2                  | 6.02E-01 | 2                  | 6.02E-01 |                    |          |                    |          |
| CRTC3    | 15  | 2                  | 5.87E-01 | 2                  | 5.87E-01 | 2                  | 6.02E-01 | 2                  | 6.02E-01 |                    |          |                    |          |
| CYP26C1  | 10  | 3                  | 5.19E-01 | 3                  | 5.19E-01 | 2                  | 6.02E-01 | 2                  | 6.02E-01 | 1                  | 6.50E-01 | 1                  | 6.50E-01 |
| PTPRQ    | 12  | 2                  | 5.28E-01 | 2                  | 5.28E-01 | 2                  | 6.02E-01 | 2                  | 6.02E-01 |                    |          |                    |          |
| PPM1A    | 14  | 2                  | 5.74E-01 | 2                  | 5.74E-01 | 2                  | 6.02E-01 | 2                  | 6.02E-01 |                    |          |                    |          |
| ABCB11   | 2   | 4                  | 3.34E-01 | 4                  | 3.34E-01 | 2                  | 6.02E-01 | 2                  | 6.02E-01 | 2                  | 6.56E-01 | 2                  | 6.56E-01 |
| LARP4B   | 10  | 2                  | 5.80E-01 | 2                  | 5.80E-01 | 2                  | 6.02E-01 | 2                  | 6.02E-01 |                    |          |                    |          |
| HEPHL1   | 11  | 2                  | 3.24E-01 | 2                  | 3.24E-01 | 2                  | 6.02E-01 | 2                  | 6.02E-01 |                    |          |                    |          |
| BNIP1    | 1   | 3                  | 1.00E+00 | 4                  | 1.00E+00 | 3                  | 6.33E-01 | 4                  | 6.02E-01 | 1                  | 6.15E-01 | 2                  | 6.83E-01 |
| DOK6     | 18  | 2                  | 5.80E-01 | 2                  | 5.80E-01 | 2                  | 6.02E-01 | 2                  | 6.02E-01 |                    |          |                    |          |
| TMC2     | 20  | 3                  | 7.05E-01 | 3                  | 7.05E-01 | 2                  | 6.02E-01 | 2                  | 6.02E-01 | 1                  | 6.56E-01 | 1                  | 6.56E-01 |
| KLHL14   | 18  | 2                  | 5.77E-01 | 2                  | 5.77E-01 | 2                  | 6.02E-01 | 2                  | 6.02E-01 |                    |          |                    |          |
| CCDC138  | 2   | 3                  | 7.07E-01 | 3                  | 7.07E-01 | 2                  | 6.02E-01 | 2                  | 6.02E-01 | 1                  | 6.18E-01 | 1                  | 6.18E-01 |
| GALNS    | 16  | 2                  | 5.26E-01 | 2                  | 5.26E-01 | 2                  | 6.02E-01 | 2                  | 6.02E-01 |                    |          |                    |          |
| ATP6V0E2 | 7   | 2                  | 5.76E-01 | 2                  | 5.76E-01 | 2                  | 6.03E-01 | 2                  | 6.03E-01 |                    |          |                    |          |
| NPAS4    | 11  | 2                  | 5.33E-01 | 2                  | 5.33E-01 | 2                  | 6.03E-01 | 2                  | 6.03E-01 |                    |          |                    |          |

| SetID        | Chr | ADEH- vs NA        |          |                    |          | ADEH+ vs ADEH-     |          |                    |          | ADEH+ vs NA        |          |                    |          |
|--------------|-----|--------------------|----------|--------------------|----------|--------------------|----------|--------------------|----------|--------------------|----------|--------------------|----------|
|              |     | rare novel         |          | all                |          | rare novel         |          | all                |          | rare novel         |          | all                |          |
|              |     | N variants in test | p-value  | N variants in test | p-value  | N variants in test | p-value  | N variants in test | p-value  | N variants in test | p-value  | N variants in test | p-value  |
| CD6          | 11  | 2                  | 5.86E-01 | 3                  | 5.71E-01 | 2                  | 6.16E-01 | 3                  | 6.03E-01 |                    |          |                    |          |
| ZGRF1        | 4   | 5                  | 8.06E-01 | 5                  | 8.06E-01 | 4                  | 6.03E-01 | 4                  | 6.03E-01 | 1                  | 6.53E-01 | 1                  | 6.53E-01 |
| C4orf36      | 4   | 2                  | 5.89E-01 | 2                  | 5.89E-01 | 2                  | 6.03E-01 | 2                  | 6.03E-01 |                    |          |                    |          |
| ESF1         | 20  | 2                  | 5.81E-01 | 2                  | 5.81E-01 | 2                  | 6.03E-01 | 2                  | 6.03E-01 |                    |          |                    |          |
| LVRN         | 5   | 4                  | 8.27E-01 | 4                  | 8.27E-01 | 3                  | 7.24E-01 | 3                  | 7.24E-01 | 1                  | 6.03E-01 | 1                  | 6.03E-01 |
| EVL          | 14  | 3                  | 6.89E-01 | 3                  | 6.89E-01 | 2                  | 6.32E-01 | 2                  | 6.32E-01 | 1                  | 6.03E-01 | 1                  | 6.03E-01 |
| NKIRAS1      | 3   | 1                  | 7.82E-02 | 1                  | 7.82E-02 |                    |          |                    |          | 1                  | 6.03E-01 | 1                  | 6.03E-01 |
| RPL3         | 22  | 1                  | 7.82E-02 | 1                  | 7.82E-02 |                    |          |                    |          | 1                  | 6.03E-01 | 1                  | 6.03E-01 |
| SPAM1        | 7   | 2                  | 9.23E-01 | 2                  | 9.23E-01 | 2                  | 6.03E-01 | 2                  | 6.03E-01 | 1                  | 6.23E-01 | 1                  | 6.23E-01 |
| FBXO16       | 8   | 3                  | 6.71E-01 | 3                  | 6.71E-01 | 2                  | 6.03E-01 | 2                  | 6.03E-01 | 1                  | 6.41E-01 | 1                  | 6.41E-01 |
| PIGX         | 3   | 2                  | 1.00E+00 | 2                  | 1.00E+00 | 2                  | 6.03E-01 | 2                  | 6.03E-01 | 1                  | 6.12E-01 | 1                  | 6.12E-01 |
| GTDC1        | 2   | 2                  | 6.61E-01 | 2                  | 6.61E-01 | 2                  | 6.03E-01 | 2                  | 6.03E-01 | 2                  | 6.20E-01 | 2                  | 6.20E-01 |
| KRTAP9-8     | 17  | 1                  | 9.11E-02 | 1                  | 9.11E-02 |                    |          |                    |          | 1                  | 6.03E-01 | 1                  | 6.03E-01 |
| XYLB         | 3   | 1                  | 9.11E-02 | 1                  | 9.11E-02 |                    |          |                    |          | 1                  | 6.03E-01 | 1                  | 6.03E-01 |
| METTL18      | 1   | 2                  | 1.00E+00 | 2                  | 1.00E+00 | 2                  | 6.20E-01 | 2                  | 6.20E-01 | 1                  | 6.03E-01 | 1                  | 6.03E-01 |
| GLMN         | 1   | 1                  | 9.11E-02 | 1                  | 9.11E-02 |                    |          |                    |          | 1                  | 6.03E-01 | 1                  | 6.03E-01 |
| CNGA4        | 11  | 3                  | 7.48E-01 | 3                  | 7.48E-01 | 2                  | 6.12E-01 | 2                  | 6.12E-01 | 1                  | 6.03E-01 | 1                  | 6.03E-01 |
| STX4         | 16  | 3                  | 7.31E-01 | 3                  | 7.31E-01 | 2                  | 6.50E-01 | 2                  | 6.50E-01 | 1                  | 6.03E-01 | 1                  | 6.03E-01 |
| VDR          | 12  | 2                  | 1.00E+00 | 3                  | 1.00E+00 | 2                  | 6.28E-01 | 3                  | 6.27E-01 | 1                  | 6.03E-01 | 2                  | 6.03E-01 |
| CABP5        | 19  | 2                  | 5.73E-01 | 3                  | 1.60E-01 | 2                  | 6.34E-01 | 3                  | 6.03E-01 |                    |          | 1                  | 1.00E+00 |
| CHST6        | 16  | 1                  | 5.79E-01 | 1                  | 5.79E-01 | 1                  | 1.00E+00 | 1                  | 1.00E+00 | 1                  | 6.03E-01 | 1                  | 6.03E-01 |
| LOC100130705 | 7   | 1                  | 5.59E-02 | 1                  | 5.59E-02 |                    |          |                    |          | 1                  | 6.03E-01 | 1                  | 6.03E-01 |
| SLCO6A1      | 5   | 1                  | 5.59E-02 | 1                  | 5.59E-02 |                    |          |                    |          | 1                  | 6.03E-01 | 1                  | 6.03E-01 |
| SPATS2       | 12  | 1                  | 5.59E-02 | 1                  | 5.59E-02 |                    |          |                    |          | 1                  | 6.03E-01 | 1                  | 6.03E-01 |
| CRTC2        | 1   | 1                  | 5.59E-02 | 1                  | 5.59E-02 |                    |          |                    |          | 1                  | 6.03E-01 | 1                  | 6.03E-01 |
| OR51E2       | 11  | 1                  | 7.40E-02 | 1                  | 7.40E-02 |                    |          |                    |          | 1                  | 6.04E-01 | 1                  | 6.04E-01 |
| TRAPPC10     | 21  | 2                  | 7.24E-01 | 2                  | 7.24E-01 | 2                  | 7.94E-01 | 2                  | 7.94E-01 | 1                  | 6.04E-01 | 1                  | 6.04E-01 |
| CNBD1        | 8   | 3                  | 6.74E-01 | 3                  | 6.74E-01 | 2                  | 6.14E-01 | 2                  | 6.14E-01 | 1                  | 6.04E-01 | 1                  | 6.04E-01 |
| SLC2A12      | 6   | 1                  | 7.40E-02 | 1                  | 7.40E-02 |                    |          |                    |          | 1                  | 6.04E-01 | 1                  | 6.04E-01 |
| SHISA7       | 19  | 1                  | 7.40E-02 | 1                  | 7.40E-02 |                    |          |                    |          | 1                  | 6.04E-01 | 1                  | 6.04E-01 |
| KRI1         | 19  | 1                  | 7.40E-02 | 1                  | 7.40E-02 |                    |          |                    |          | 1                  | 6.04E-01 | 1                  | 6.04E-01 |
| MDN1         | 6   | 15                 | 1.46E-01 | 15                 | 1.46E-01 | 11                 | 6.04E-01 | 11                 | 6.04E-01 | 7                  | 6.16E-01 | 7                  | 6.16E-01 |
| STON2        | 14  | 3                  | 1.00E+00 | 4                  | 1.00E+00 | 3                  | 7.08E-01 | 4                  | 7.09E-01 | 1                  | 6.04E-01 | 2                  | 6.04E-01 |
| DGKB         | 7   | 1                  | 7.04E-02 | 1                  | 7.04E-02 |                    |          |                    |          | 1                  | 6.04E-01 | 1                  | 6.04E-01 |
| ACRV1        | 11  | 1                  | 7.04E-02 | 1                  | 7.04E-02 |                    |          |                    |          | 1                  | 6.04E-01 | 1                  | 6.04E-01 |
| NDUF6        | 9   | 1                  | 7.04E-02 | 1                  | 7.04E-02 |                    |          |                    |          | 1                  | 6.04E-01 | 1                  | 6.04E-01 |
| SLC39A14     | 8   | 3                  | 9.27E-01 | 3                  | 9.27E-01 | 3                  | 7.66E-01 | 3                  | 7.66E-01 | 1                  | 6.04E-01 | 1                  | 6.04E-01 |
| HPGD         | 4   | 1                  | 7.04E-02 | 1                  | 7.04E-02 |                    |          |                    |          | 1                  | 6.04E-01 | 1                  | 6.04E-01 |
| PRKCG        | 19  | 1                  | 7.04E-02 | 1                  | 7.04E-02 |                    |          |                    |          | 1                  | 6.04E-01 | 1                  | 6.04E-01 |
| IRF2BP2      | 1   | 3                  | 6.50E-01 | 3                  | 6.50E-01 | 2                  | 6.20E-01 | 2                  | 6.20E-01 | 1                  | 6.04E-01 | 1                  | 6.04E-01 |
| AQP9         | 15  | 3                  | 7.39E-01 | 3                  | 7.39E-01 | 2                  | 6.04E-01 | 2                  | 6.04E-01 | 1                  | 6.44E-01 | 1                  | 6.44E-01 |
| SPIRE1       | 18  | 2                  | 5.88E-01 | 2                  | 5.88E-01 | 2                  | 6.04E-01 | 2                  | 6.04E-01 |                    |          |                    |          |
| DLK2         | 6   | 2                  | 5.63E-01 | 2                  | 5.63E-01 | 2                  | 6.04E-01 | 2                  | 6.04E-01 |                    |          |                    |          |
| PSMD13       | 11  | 3                  | 6.26E-01 | 3                  | 6.26E-01 | 2                  | 6.29E-01 | 2                  | 6.29E-01 | 1                  | 6.04E-01 | 1                  | 6.04E-01 |
| STARD7       | 2   | 3                  | 4.81E-01 | 3                  | 4.81E-01 | 2                  | 6.80E-01 | 2                  | 6.80E-01 | 1                  | 6.04E-01 | 1                  | 6.04E-01 |
| ZNF586       | 19  | 3                  | 7.50E-01 | 3                  | 7.50E-01 | 3                  | 8.11E-01 | 3                  | 8.11E-01 | 1                  | 6.04E-01 | 1                  | 6.04E-01 |
| SELP         | 1   | 3                  | 6.64E-01 | 3                  | 6.64E-01 | 2                  | 6.09E-01 | 2                  | 6.09E-01 | 1                  | 6.04E-01 | 1                  | 6.04E-01 |
| WWP1         | 8   | 3                  | 6.33E-01 | 3                  | 6.33E-01 | 2                  | 6.42E-01 | 2                  | 6.42E-01 | 1                  | 6.04E-01 | 1                  | 6.04E-01 |



| SetID     | Chr | ADEH- vs NA        |          |                    |          | ADEH+ vs ADEH-     |          |                    |          | ADEH+ vs NA        |          |                    |          |
|-----------|-----|--------------------|----------|--------------------|----------|--------------------|----------|--------------------|----------|--------------------|----------|--------------------|----------|
|           |     | rare novel         |          | all                |          | rare novel         |          | all                |          | rare novel         |          | all                |          |
|           |     | N variants in test | p-value  | N variants in test | p-value  | N variants in test | p-value  | N variants in test | p-value  | N variants in test | p-value  | N variants in test | p-value  |
| FAM76A    | 1   | 2                  | 5.73E-01 | 2                  | 5.73E-01 | 2                  | 6.06E-01 | 2                  | 6.06E-01 |                    |          |                    |          |
| SDPR      | 2   | 1                  | 7.68E-02 | 1                  | 7.68E-02 |                    |          |                    |          | 1                  | 6.06E-01 | 1                  | 6.06E-01 |
| SPATA6L   | 9   | 2                  | 1.00E+00 | 2                  | 1.00E+00 | 2                  | 6.07E-01 | 2                  | 6.07E-01 | 1                  | 6.06E-01 | 1                  | 6.06E-01 |
| COASY     | 17  | 3                  | 6.73E-01 | 3                  | 6.73E-01 | 2                  | 6.62E-01 | 2                  | 6.62E-01 | 1                  | 6.06E-01 | 1                  | 6.06E-01 |
| RASL10A   | 22  | 1                  | 7.68E-02 | 1                  | 7.68E-02 |                    |          |                    |          | 1                  | 6.06E-01 | 1                  | 6.06E-01 |
| FAAH      | 1   | 2                  | 9.28E-01 | 2                  | 9.28E-01 | 2                  | 6.64E-01 | 2                  | 6.64E-01 | 1                  | 6.06E-01 | 1                  | 6.06E-01 |
| MIER1     | 1   | 2                  | 5.30E-01 | 2                  | 5.30E-01 | 2                  | 6.06E-01 | 2                  | 6.06E-01 |                    |          |                    |          |
| YTHDC1    | 4   | 3                  | 5.68E-01 | 3                  | 5.68E-01 | 2                  | 6.06E-01 | 2                  | 6.06E-01 | 1                  | 6.52E-01 | 1                  | 6.52E-01 |
| FANCD2OS  | 3   | 3                  | 5.22E-01 | 3                  | 5.22E-01 | 2                  | 6.06E-01 | 2                  | 6.06E-01 | 1                  | 6.98E-01 | 1                  | 6.98E-01 |
| GPCPD1    | 20  | 2                  | 5.83E-01 | 2                  | 5.83E-01 | 2                  | 6.06E-01 | 2                  | 6.06E-01 |                    |          |                    |          |
| FSIP1     | 15  | 3                  | 6.49E-01 | 5                  | 5.14E-01 | 2                  | 6.06E-01 | 4                  | 7.51E-01 | 2                  | 6.47E-01 | 4                  | 9.12E-01 |
| SIRT7     | 17  | 1                  | 6.86E-02 | 1                  | 6.86E-02 |                    |          |                    |          | 1                  | 6.06E-01 | 1                  | 6.06E-01 |
| TARBP1    | 1   | 5                  | 7.92E-01 | 5                  | 7.92E-01 | 4                  | 8.23E-01 | 4                  | 8.23E-01 | 1                  | 6.06E-01 | 1                  | 6.06E-01 |
| DPP4      | 2   | 4                  | 7.84E-01 | 4                  | 7.84E-01 | 3                  | 7.64E-01 | 3                  | 7.64E-01 | 1                  | 6.06E-01 | 1                  | 6.06E-01 |
| RNF219    | 13  | 1                  | 6.86E-02 | 1                  | 6.86E-02 |                    |          |                    |          | 1                  | 6.06E-01 | 1                  | 6.06E-01 |
| THBD      | 20  | 1                  | 6.86E-02 | 1                  | 6.86E-02 |                    |          |                    |          | 1                  | 6.06E-01 | 1                  | 6.06E-01 |
| TAT       | 16  | 3                  | 6.40E-01 | 3                  | 6.40E-01 | 2                  | 6.28E-01 | 2                  | 6.28E-01 | 1                  | 6.06E-01 | 1                  | 6.06E-01 |
| FAM102B   | 1   | 1                  | 6.86E-02 | 1                  | 6.86E-02 |                    |          |                    |          | 1                  | 6.06E-01 | 1                  | 6.06E-01 |
| C1orf194  | 1   | 2                  | 1.81E-02 | 3                  | 2.31E-01 |                    |          | 1                  | 6.06E-01 | 2                  | 6.15E-01 | 3                  | 1.00E+00 |
| CNOT11    | 2   | 2                  | 5.81E-01 | 2                  | 5.81E-01 | 2                  | 6.06E-01 | 2                  | 6.06E-01 |                    |          |                    |          |
| TMEM220   | 17  | 2                  | 5.70E-01 | 2                  | 5.70E-01 | 2                  | 6.06E-01 | 2                  | 6.06E-01 |                    |          |                    |          |
| TAS2R60   | 7   | 2                  | 5.73E-01 | 2                  | 5.73E-01 | 2                  | 6.07E-01 | 2                  | 6.07E-01 |                    |          |                    |          |
| TOB2      | 22  | 2                  | 6.51E-01 | 2                  | 6.51E-01 | 2                  | 6.07E-01 | 2                  | 6.07E-01 | 2                  | 6.26E-01 | 2                  | 6.26E-01 |
| IPO8      | 12  | 2                  | 5.80E-01 | 2                  | 5.80E-01 | 2                  | 6.07E-01 | 2                  | 6.07E-01 |                    |          |                    |          |
| ELMO1     | 7   | 2                  | 5.74E-01 | 2                  | 5.74E-01 | 2                  | 6.07E-01 | 2                  | 6.07E-01 |                    |          |                    |          |
| ZNF85     | 19  | 3                  | 6.70E-01 | 4                  | 7.23E-01 | 2                  | 6.19E-01 | 3                  | 7.27E-01 | 1                  | 6.07E-01 | 2                  | 6.61E-01 |
| VPS50     | 7   | 3                  | 6.39E-01 | 3                  | 6.39E-01 | 2                  | 6.47E-01 | 2                  | 6.47E-01 | 1                  | 6.07E-01 | 1                  | 6.07E-01 |
| GOT1      | 10  | 1                  | 7.16E-02 | 1                  | 7.16E-02 |                    |          |                    |          | 1                  | 6.07E-01 | 1                  | 6.07E-01 |
| DDX31     | 9   | 3                  | 2.86E-01 | 3                  | 2.86E-01 | 2                  | 1.00E+00 | 2                  | 1.00E+00 | 1                  | 6.07E-01 | 1                  | 6.07E-01 |
| HAUS6     | 9   | 2                  | 5.59E-01 | 2                  | 5.59E-01 | 2                  | 6.07E-01 | 2                  | 6.07E-01 |                    |          |                    |          |
| SCARB1    | 12  | 2                  | 5.72E-01 | 2                  | 5.72E-01 | 2                  | 6.07E-01 | 2                  | 6.07E-01 |                    |          |                    |          |
| NR1I3     | 1   | 2                  | 5.74E-01 | 2                  | 5.74E-01 | 2                  | 6.07E-01 | 2                  | 6.07E-01 |                    |          |                    |          |
| OR2G3     | 1   | 3                  | 1.00E+00 | 4                  | 1.00E+00 | 3                  | 6.07E-01 | 4                  | 6.07E-01 | 1                  | 6.65E-01 | 2                  | 6.65E-01 |
| TBC1D10B  | 16  | 1                  | 7.43E-02 | 1                  | 7.43E-02 |                    |          |                    |          | 1                  | 6.07E-01 | 1                  | 6.07E-01 |
| MEOX2     | 7   | 1                  | 7.43E-02 | 1                  | 7.43E-02 |                    |          |                    |          | 1                  | 6.07E-01 | 1                  | 6.07E-01 |
| DCN       | 12  | 1                  | 7.43E-02 | 1                  | 7.43E-02 |                    |          |                    |          | 1                  | 6.07E-01 | 1                  | 6.07E-01 |
| PAX6      | 11  | 1                  | 7.43E-02 | 1                  | 7.43E-02 |                    |          |                    |          | 1                  | 6.07E-01 | 1                  | 6.07E-01 |
| UBQLNL    | 11  | 3                  | 9.08E-01 | 3                  | 9.08E-01 | 3                  | 6.84E-01 | 3                  | 6.84E-01 | 1                  | 6.07E-01 | 1                  | 6.07E-01 |
| TARS2     | 1   | 1                  | 7.43E-02 | 1                  | 7.43E-02 |                    |          |                    |          | 1                  | 6.07E-01 | 1                  | 6.07E-01 |
| GABARAPL2 | 16  | 1                  | 7.43E-02 | 1                  | 7.43E-02 |                    |          |                    |          | 1                  | 6.07E-01 | 1                  | 6.07E-01 |
| TBC1D15   | 12  | 1                  | 7.43E-02 | 1                  | 7.43E-02 |                    |          |                    |          | 1                  | 6.07E-01 | 1                  | 6.07E-01 |
| ANGPT2    | 8   | 3                  | 8.75E-01 | 3                  | 8.75E-01 | 2                  | 6.98E-01 | 2                  | 6.98E-01 | 2                  | 6.07E-01 | 2                  | 6.07E-01 |
| USP16     | 21  | 2                  | 5.66E-01 | 2                  | 5.66E-01 | 2                  | 6.07E-01 | 2                  | 6.07E-01 |                    |          |                    |          |
| TUBAL3    | 10  | 5                  | 2.44E-01 | 5                  | 2.44E-01 | 4                  | 6.07E-01 | 4                  | 6.07E-01 | 2                  | 1.00E+00 | 2                  | 1.00E+00 |
| PTK2B     | 8   | 2                  | 5.73E-01 | 2                  | 5.73E-01 | 2                  | 6.07E-01 | 2                  | 6.07E-01 |                    |          |                    |          |
| IBTK      | 6   | 5                  | 5.53E-01 | 5                  | 5.53E-01 | 3                  | 6.42E-01 | 3                  | 6.42E-01 | 2                  | 6.07E-01 | 2                  | 6.07E-01 |
| PITRM1    | 10  | 9                  | 3.46E-01 | 9                  | 3.46E-01 | 6                  | 1.00E+00 | 6                  | 1.00E+00 | 7                  | 6.07E-01 | 7                  | 6.07E-01 |
| ZNF174    | 16  | 3                  | 7.31E-01 | 3                  | 7.31E-01 | 2                  | 6.07E-01 | 2                  | 6.07E-01 | 1                  | 6.34E-01 | 1                  | 6.34E-01 |





| SetID        | Chr | ADEH- vs NA        |          |                    |          | ADEH+ vs ADEH-     |          |                    |          | ADEH+ vs NA        |          |                    |          |
|--------------|-----|--------------------|----------|--------------------|----------|--------------------|----------|--------------------|----------|--------------------|----------|--------------------|----------|
|              |     | rarenovel          |          | all                |          | rarenovel          |          | all                |          | rarenovel          |          | all                |          |
|              |     | N variants in test | p-value  | N variants in test | p-value  | N variants in test | p-value  | N variants in test | p-value  | N variants in test | p-value  | N variants in test | p-value  |
| USF1         | 1   | 1                  | 6.83E-02 | 1                  | 6.83E-02 |                    |          |                    |          | 1                  | 6.09E-01 | 1                  | 6.09E-01 |
| CMPK2        | 2   | 1                  | 6.83E-02 | 1                  | 6.83E-02 |                    |          |                    |          | 1                  | 6.09E-01 | 1                  | 6.09E-01 |
| ZAR1         | 4   | 1                  | 6.83E-02 | 1                  | 6.83E-02 |                    |          |                    |          | 1                  | 6.09E-01 | 1                  | 6.09E-01 |
| ADCK1        | 14  | 2                  | 9.26E-01 | 2                  | 9.26E-01 | 2                  | 6.43E-01 | 2                  | 6.43E-01 | 1                  | 6.09E-01 | 1                  | 6.09E-01 |
| PACSN1       | 6   | 2                  | 5.77E-01 | 2                  | 5.77E-01 | 2                  | 6.09E-01 | 2                  | 6.09E-01 |                    |          |                    |          |
| BBOF1        | 14  | 2                  | 5.75E-01 | 2                  | 5.75E-01 | 2                  | 6.09E-01 | 2                  | 6.09E-01 |                    |          |                    |          |
| ASXL1        | 20  | 4                  | 7.55E-01 | 4                  | 7.55E-01 | 3                  | 6.47E-01 | 3                  | 6.47E-01 | 2                  | 6.09E-01 | 2                  | 6.09E-01 |
| RFWD3        | 16  | 2                  | 5.82E-01 | 2                  | 5.82E-01 | 2                  | 6.09E-01 | 2                  | 6.09E-01 |                    |          |                    |          |
| IL1R2        | 2   | 2                  | 9.25E-01 | 2                  | 9.25E-01 | 2                  | 6.09E-01 | 2                  | 6.09E-01 | 1                  | 6.18E-01 | 1                  | 6.18E-01 |
| ZNF283       | 19  | 2                  | 5.89E-01 | 2                  | 5.89E-01 | 2                  | 6.10E-01 | 2                  | 6.10E-01 |                    |          |                    |          |
| BAIAP2L2     | 22  | 2                  | 5.82E-01 | 2                  | 5.82E-01 | 2                  | 6.10E-01 | 2                  | 6.10E-01 |                    |          |                    |          |
| THRAP3       | 1   | 2                  | 5.85E-01 | 2                  | 5.85E-01 | 2                  | 6.10E-01 | 2                  | 6.10E-01 |                    |          |                    |          |
| SREK1        | 5   | 1                  | 6.47E-02 | 1                  | 6.47E-02 |                    |          |                    |          | 1                  | 6.10E-01 | 1                  | 6.10E-01 |
| CPD          | 17  | 2                  | 5.67E-01 | 2                  | 5.67E-01 | 2                  | 6.10E-01 | 2                  | 6.10E-01 |                    |          |                    |          |
| ECHDC3       | 10  | 2                  | 5.72E-01 | 4                  | 5.23E-01 | 2                  | 6.10E-01 | 4                  | 6.45E-01 |                    |          | 2                  | 1.00E+00 |
| HTR3A        | 11  | 4                  | 7.73E-01 | 4                  | 7.73E-01 | 3                  | 7.74E-01 | 3                  | 7.74E-01 | 1                  | 6.10E-01 | 1                  | 6.10E-01 |
| SARAF        | 8   | 1                  | 6.68E-02 | 1                  | 6.68E-02 |                    |          |                    |          | 1                  | 6.10E-01 | 1                  | 6.10E-01 |
| B4GALT2      | 1   | 1                  | 6.68E-02 | 1                  | 6.68E-02 |                    |          |                    |          | 1                  | 6.10E-01 | 1                  | 6.10E-01 |
| SLC16A7      | 12  | 3                  | 7.14E-01 | 3                  | 7.14E-01 | 2                  | 6.10E-01 | 2                  | 6.10E-01 | 1                  | 6.98E-01 | 1                  | 6.98E-01 |
| ME3          | 11  | 3                  | 6.87E-01 | 3                  | 6.87E-01 | 2                  | 6.32E-01 | 2                  | 6.32E-01 | 1                  | 6.10E-01 | 1                  | 6.10E-01 |
| KIAA1715     | 2   | 1                  | 7.86E-02 | 1                  | 7.86E-02 |                    |          |                    |          | 1                  | 6.10E-01 | 1                  | 6.10E-01 |
| SPOCD1       | 1   | 3                  | 6.87E-01 | 3                  | 6.87E-01 | 2                  | 6.28E-01 | 2                  | 6.28E-01 | 1                  | 6.10E-01 | 1                  | 6.10E-01 |
| MAN1A2       | 1   | 1                  | 7.86E-02 | 1                  | 7.86E-02 |                    |          |                    |          | 1                  | 6.10E-01 | 1                  | 6.10E-01 |
| COPG2        | 7   | 1                  | 7.86E-02 | 1                  | 7.86E-02 |                    |          |                    |          | 1                  | 6.10E-01 | 1                  | 6.10E-01 |
| GNL2         | 1   | 2                  | 5.85E-01 | 2                  | 5.85E-01 | 2                  | 6.10E-01 | 2                  | 6.10E-01 |                    |          |                    |          |
| TMEM59       | 1   | 2                  | 5.82E-01 | 2                  | 5.82E-01 | 2                  | 6.10E-01 | 2                  | 6.10E-01 |                    |          |                    |          |
| MAP10        | 1   | 1                  | 7.52E-02 | 1                  | 7.52E-02 |                    |          |                    |          | 1                  | 6.10E-01 | 1                  | 6.10E-01 |
| CHAMP1       | 13  | 1                  | 7.52E-02 | 1                  | 7.52E-02 |                    |          |                    |          | 1                  | 6.10E-01 | 1                  | 6.10E-01 |
| C1QC         | 1   | 1                  | 7.52E-02 | 1                  | 7.52E-02 |                    |          |                    |          | 1                  | 6.10E-01 | 1                  | 6.10E-01 |
| MLEC         | 12  | 1                  | 7.52E-02 | 1                  | 7.52E-02 |                    |          |                    |          | 1                  | 6.10E-01 | 1                  | 6.10E-01 |
| NABP1        | 2   | 1                  | 7.52E-02 | 1                  | 7.52E-02 |                    |          |                    |          | 1                  | 6.10E-01 | 1                  | 6.10E-01 |
| OR2A14       | 7   | 3                  | 6.79E-01 | 3                  | 6.79E-01 | 2                  | 6.27E-01 | 2                  | 6.27E-01 | 1                  | 6.10E-01 | 1                  | 6.10E-01 |
| DCLRE1C      | 10  | 2                  | 1.00E+00 | 2                  | 1.00E+00 | 2                  | 6.13E-01 | 2                  | 6.13E-01 | 1                  | 6.10E-01 | 1                  | 6.10E-01 |
| KCNA2        | 1   | 3                  | 6.74E-01 | 3                  | 6.74E-01 | 2                  | 6.47E-01 | 2                  | 6.47E-01 | 1                  | 6.10E-01 | 1                  | 6.10E-01 |
| C1QTNF7      | 4   | 2                  | 2.07E-02 | 2                  | 2.07E-02 |                    |          |                    |          | 2                  | 6.10E-01 | 2                  | 6.10E-01 |
| TCF20        | 22  | 3                  | 7.27E-01 | 3                  | 7.27E-01 | 2                  | 6.10E-01 | 2                  | 6.10E-01 | 1                  | 6.31E-01 | 1                  | 6.31E-01 |
| ATP5J2-PTCD1 | 7   | 6                  | 7.15E-01 | 6                  | 7.15E-01 | 5                  | 6.10E-01 | 5                  | 6.10E-01 | 5                  | 7.39E-01 | 5                  | 7.39E-01 |
| PTCD1        | 7   | 6                  | 7.15E-01 | 6                  | 7.15E-01 | 5                  | 6.10E-01 | 5                  | 6.10E-01 | 5                  | 7.39E-01 | 5                  | 7.39E-01 |
| FH           | 1   | 2                  | 5.72E-01 | 2                  | 5.72E-01 | 2                  | 6.10E-01 | 2                  | 6.10E-01 |                    |          |                    |          |
| ADAM9        | 8   | 2                  | 1.00E+00 | 2                  | 1.00E+00 | 2                  | 6.10E-01 | 2                  | 6.10E-01 | 1                  | 6.28E-01 | 1                  | 6.28E-01 |
| RTP5         | 2   | 4                  | 3.32E-01 | 4                  | 3.32E-01 | 2                  | 6.36E-01 | 2                  | 6.36E-01 | 2                  | 6.10E-01 | 2                  | 6.10E-01 |
| POT1         | 7   | 3                  | 6.95E-01 | 3                  | 6.95E-01 | 2                  | 6.11E-01 | 2                  | 6.11E-01 | 1                  | 6.85E-01 | 1                  | 6.85E-01 |
| RNF169       | 11  | 5                  | 4.71E-01 | 5                  | 4.71E-01 | 3                  | 6.11E-01 | 3                  | 6.11E-01 | 2                  | 6.30E-01 | 2                  | 6.30E-01 |
| CD1C         | 1   | 4                  | 5.90E-01 | 4                  | 5.90E-01 | 3                  | 6.11E-01 | 3                  | 6.11E-01 | 1                  | 6.30E-01 | 1                  | 6.30E-01 |
| TMEM116      | 12  | 2                  | 5.70E-01 | 2                  | 5.70E-01 | 2                  | 6.11E-01 | 2                  | 6.11E-01 |                    |          |                    |          |
| GMNC         | 3   | 1                  | 6.77E-02 | 1                  | 6.77E-02 |                    |          |                    |          | 1                  | 6.11E-01 | 1                  | 6.11E-01 |
| CCDC38       | 12  | 1                  | 6.77E-02 | 1                  | 6.77E-02 |                    |          |                    |          | 1                  | 6.11E-01 | 1                  | 6.11E-01 |
| IGSF9B       | 11  | 1                  | 6.77E-02 | 1                  | 6.77E-02 |                    |          |                    |          | 1                  | 6.11E-01 | 1                  | 6.11E-01 |



| SetID    | Chr | ADEH- vs NA        |          |                    |          | ADEH+ vs ADEH-     |          |                    |          | ADEH+ vs NA        |          |                    |          |
|----------|-----|--------------------|----------|--------------------|----------|--------------------|----------|--------------------|----------|--------------------|----------|--------------------|----------|
|          |     | N variants in test | p-value  | N variants in test | p-value  | N variants in test | p-value  | N variants in test | p-value  | N variants in test | p-value  | N variants in test | p-value  |
| NKAIN1   | 1   | 1                  | 7.85E-02 | 1                  | 7.85E-02 |                    |          |                    |          | 1                  | 6.12E-01 | 1                  | 6.12E-01 |
| CHGB     | 20  | 3                  | 6.93E-01 | 3                  | 6.93E-01 | 2                  | 6.24E-01 | 2                  | 6.24E-01 | 1                  | 6.12E-01 | 1                  | 6.12E-01 |
| ARNT     | 1   | 3                  | 1.00E+00 | 3                  | 1.00E+00 | 3                  | 6.38E-01 | 3                  | 6.38E-01 | 1                  | 6.12E-01 | 1                  | 6.12E-01 |
| TMEM50B  | 21  | 1                  | 7.85E-02 | 1                  | 7.85E-02 |                    |          |                    |          | 1                  | 6.12E-01 | 1                  | 6.12E-01 |
| UBTD1    | 10  | 3                  | 7.58E-01 | 3                  | 7.58E-01 | 3                  | 7.84E-01 | 3                  | 7.84E-01 | 1                  | 6.12E-01 | 1                  | 6.12E-01 |
| TMEM51   | 1   | 1                  | 7.85E-02 | 1                  | 7.85E-02 |                    |          |                    |          | 1                  | 6.12E-01 | 1                  | 6.12E-01 |
| PNLIP    | 10  | 1                  | 7.85E-02 | 1                  | 7.85E-02 |                    |          |                    |          | 1                  | 6.12E-01 | 1                  | 6.12E-01 |
| NES      | 1   | 1                  | 7.85E-02 | 1                  | 7.85E-02 |                    |          |                    |          | 1                  | 6.12E-01 | 1                  | 6.12E-01 |
| THAP3    | 1   | 1                  | 7.85E-02 | 1                  | 7.85E-02 |                    |          |                    |          | 1                  | 6.12E-01 | 1                  | 6.12E-01 |
| CRISPLD2 | 16  | 3                  | 6.87E-01 | 3                  | 6.87E-01 | 2                  | 6.12E-01 | 2                  | 6.12E-01 | 1                  | 6.18E-01 | 1                  | 6.18E-01 |
| KRT10    | 17  | 2                  | 9.21E-01 | 2                  | 9.21E-01 | 2                  | 6.12E-01 | 2                  | 6.12E-01 | 1                  | 6.68E-01 | 1                  | 6.68E-01 |
| CYP51A1  | 7   | 3                  | 7.63E-01 | 3                  | 7.63E-01 | 2                  | 6.12E-01 | 2                  | 6.12E-01 | 1                  | 6.41E-01 | 1                  | 6.41E-01 |
| FHAD1    | 1   | 3                  | 6.59E-01 | 4                  | 6.59E-01 | 2                  | 6.13E-01 | 3                  | 6.12E-01 | 1                  | 6.70E-01 | 2                  | 6.73E-01 |
| FBXO21   | 12  | 2                  | 5.52E-01 | 2                  | 5.52E-01 | 2                  | 6.12E-01 | 2                  | 6.12E-01 |                    |          |                    |          |
| CHPF     | 2   | 2                  | 5.81E-01 | 2                  | 5.81E-01 | 2                  | 6.12E-01 | 2                  | 6.12E-01 |                    |          |                    |          |
| GLRX5    | 14  | 2                  | 3.24E-01 | 2                  | 3.24E-01 | 2                  | 6.12E-01 | 2                  | 6.12E-01 |                    |          |                    |          |
| P4HTM    | 3   | 1                  | 1.18E-01 | 1                  | 1.18E-01 |                    |          |                    |          | 1                  | 6.12E-01 | 1                  | 6.12E-01 |
| STARD5   | 15  | 1                  | 1.18E-01 | 1                  | 1.18E-01 |                    |          |                    |          | 1                  | 6.12E-01 | 1                  | 6.12E-01 |
| MGME1    | 20  | 1                  | 1.18E-01 | 2                  | 1.70E-01 |                    |          | 1                  | 8.51E-01 | 1                  | 6.12E-01 | 2                  | 6.67E-01 |
| NEO1     | 15  | 3                  | 8.81E-01 | 3                  | 8.81E-01 | 3                  | 6.62E-01 | 3                  | 6.62E-01 | 1                  | 6.12E-01 | 1                  | 6.12E-01 |
| NUP133   | 1   | 4                  | 8.15E-01 | 4                  | 8.15E-01 | 3                  | 6.79E-01 | 3                  | 6.79E-01 | 1                  | 6.12E-01 | 1                  | 6.12E-01 |
| SPATA7   | 14  | 2                  | 1.00E+00 | 2                  | 1.00E+00 | 2                  | 6.21E-01 | 2                  | 6.21E-01 | 1                  | 6.12E-01 | 1                  | 6.12E-01 |
| PROZ     | 13  | 2                  | 1.00E+00 | 2                  | 1.00E+00 | 2                  | 6.19E-01 | 2                  | 6.19E-01 | 1                  | 6.12E-01 | 1                  | 6.12E-01 |
| FLG      | 1   | 3                  | 7.21E-01 | 3                  | 7.21E-01 | 2                  | 6.12E-01 | 2                  | 6.12E-01 | 1                  | 6.17E-01 | 1                  | 6.17E-01 |
| CD209    | 19  | 2                  | 9.27E-01 | 2                  | 9.27E-01 | 2                  | 6.12E-01 | 2                  | 6.12E-01 | 1                  | 6.64E-01 | 1                  | 6.64E-01 |
| SPATC1L  | 21  | 2                  | 9.02E-01 | 2                  | 9.02E-01 | 2                  | 6.17E-01 | 2                  | 6.17E-01 | 1                  | 6.12E-01 | 1                  | 6.12E-01 |
| MKL2     | 16  | 1                  | 6.93E-02 | 1                  | 6.93E-02 |                    |          |                    |          | 1                  | 6.12E-01 | 1                  | 6.12E-01 |
| USP2     | 11  | 3                  | 6.21E-01 | 3                  | 6.21E-01 | 2                  | 6.21E-01 | 2                  | 6.21E-01 | 1                  | 6.12E-01 | 1                  | 6.12E-01 |
| C6orf118 | 6   | 3                  | 6.40E-01 | 3                  | 6.40E-01 | 2                  | 6.30E-01 | 2                  | 6.30E-01 | 1                  | 6.12E-01 | 1                  | 6.12E-01 |
| OLIG3    | 6   | 1                  | 6.93E-02 | 1                  | 6.93E-02 |                    |          |                    |          | 1                  | 6.12E-01 | 1                  | 6.12E-01 |
| MGAT4C   | 12  | 1                  | 6.93E-02 | 1                  | 6.93E-02 |                    |          |                    |          | 1                  | 6.12E-01 | 1                  | 6.12E-01 |
| ART3     | 4   | 1                  | 6.93E-02 | 1                  | 6.93E-02 |                    |          |                    |          | 1                  | 6.12E-01 | 1                  | 6.12E-01 |
| SPARC    | 5   | 1                  | 6.93E-02 | 1                  | 6.93E-02 |                    |          |                    |          | 1                  | 6.12E-01 | 1                  | 6.12E-01 |
| TTL110   | 1   | 4                  | 3.10E-01 | 4                  | 3.10E-01 | 2                  | 6.13E-01 | 2                  | 6.13E-01 | 2                  | 6.40E-01 | 2                  | 6.40E-01 |
| ADH6     | 4   | 2                  | 6.41E-01 | 2                  | 6.41E-01 | 2                  | 6.13E-01 | 2                  | 6.13E-01 | 2                  | 6.50E-01 | 2                  | 6.50E-01 |
| HTRA3    | 4   | 3                  | 1.00E+00 | 3                  | 1.00E+00 | 3                  | 6.13E-01 | 3                  | 6.13E-01 | 2                  | 1.00E+00 | 2                  | 1.00E+00 |
| HEYL     | 1   | 2                  | 5.75E-01 | 2                  | 5.75E-01 | 2                  | 6.13E-01 | 2                  | 6.13E-01 |                    |          |                    |          |
| OR11G2   | 14  | 2                  | 5.84E-01 | 2                  | 5.84E-01 | 2                  | 6.13E-01 | 2                  | 6.13E-01 |                    |          |                    |          |
| MPP5     | 14  | 3                  | 6.56E-01 | 3                  | 6.56E-01 | 2                  | 6.13E-01 | 2                  | 6.13E-01 | 1                  | 6.18E-01 | 1                  | 6.18E-01 |
| ZNF136   | 19  | 2                  | 5.66E-01 | 2                  | 5.66E-01 | 2                  | 6.13E-01 | 2                  | 6.13E-01 |                    |          |                    |          |
| CHI3L2   | 1   | 3                  | 2.94E-01 | 4                  | 3.44E-01 | 2                  | 6.13E-01 | 3                  | 1.00E+00 | 1                  | 6.44E-01 | 2                  | 7.75E-01 |
| PLPPR3   | 19  | 3                  | 5.14E-01 | 3                  | 5.14E-01 | 2                  | 6.13E-01 | 2                  | 6.13E-01 | 1                  | 6.42E-01 | 1                  | 6.42E-01 |
| TRUB2    | 9   | 3                  | 6.55E-01 | 3                  | 6.55E-01 | 2                  | 6.40E-01 | 2                  | 6.40E-01 | 1                  | 6.13E-01 | 1                  | 6.13E-01 |
| OR6C3    | 12  | 1                  | 7.44E-02 | 1                  | 7.44E-02 |                    |          |                    |          | 1                  | 6.13E-01 | 1                  | 6.13E-01 |
| CHMP1A   | 16  | 1                  | 7.44E-02 | 1                  | 7.44E-02 |                    |          |                    |          | 1                  | 6.13E-01 | 1                  | 6.13E-01 |
| SLC25A36 | 3   | 1                  | 7.44E-02 | 1                  | 7.44E-02 |                    |          |                    |          | 1                  | 6.13E-01 | 1                  | 6.13E-01 |
| ZDHHC21  | 9   | 1                  | 7.44E-02 | 1                  | 7.44E-02 |                    |          |                    |          | 1                  | 6.13E-01 | 1                  | 6.13E-01 |
| MICALL1  | 22  | 3                  | 6.66E-01 | 3                  | 6.66E-01 | 2                  | 6.13E-01 | 2                  | 6.13E-01 | 1                  | 6.30E-01 | 1                  | 6.30E-01 |

| SetID   | Chr | ADEH- vs NA        |          |                    |          | ADEH+ vs ADEH-     |          |                    |          | ADEH+ vs NA        |          |                    |          |
|---------|-----|--------------------|----------|--------------------|----------|--------------------|----------|--------------------|----------|--------------------|----------|--------------------|----------|
|         |     | rarenovel          |          | all                |          | rarenovel          |          | all                |          | rarenovel          |          | all                |          |
|         |     | N variants in test | p-value  | N variants in test | p-value  | N variants in test | p-value  | N variants in test | p-value  | N variants in test | p-value  | N variants in test | p-value  |
| MGAM2   | 7   | 2                  | 5.70E-01 | 2                  | 5.70E-01 | 2                  | 6.13E-01 | 2                  | 6.13E-01 |                    |          |                    |          |
| GPR153  | 1   | 2                  | 1.00E+00 | 2                  | 1.00E+00 | 2                  | 6.16E-01 | 2                  | 6.16E-01 | 1                  | 6.13E-01 | 1                  | 6.13E-01 |
| LAIR1   | 19  | 1                  | 8.78E-02 | 1                  | 8.78E-02 |                    |          |                    |          | 1                  | 6.13E-01 | 1                  | 6.13E-01 |
| C1orf61 | 1   | 1                  | 8.78E-02 | 1                  | 8.78E-02 |                    |          |                    |          | 1                  | 6.13E-01 | 1                  | 6.13E-01 |
| TMEM169 | 2   | 1                  | 8.78E-02 | 1                  | 8.78E-02 |                    |          |                    |          | 1                  | 6.13E-01 | 1                  | 6.13E-01 |
| B4GALT7 | 5   | 4                  | 6.16E-01 | 4                  | 6.16E-01 | 3                  | 6.90E-01 | 3                  | 6.90E-01 | 1                  | 6.13E-01 | 1                  | 6.13E-01 |
| GLRB    | 4   | 1                  | 8.07E-02 | 1                  | 8.07E-02 |                    |          |                    |          | 1                  | 6.13E-01 | 1                  | 6.13E-01 |
| CHL1    | 3   | 3                  | 6.61E-01 | 3                  | 6.61E-01 | 2                  | 6.35E-01 | 2                  | 6.35E-01 | 1                  | 6.13E-01 | 1                  | 6.13E-01 |
| SOX14   | 3   | 1                  | 8.07E-02 | 1                  | 8.07E-02 |                    |          |                    |          | 1                  | 6.13E-01 | 1                  | 6.13E-01 |
| VARS    | 6   | 4                  | 3.36E-01 | 4                  | 3.36E-01 | 2                  | 6.13E-01 | 2                  | 6.13E-01 | 2                  | 6.35E-01 | 2                  | 6.35E-01 |
| INSL6   | 9   | 2                  | 9.25E-01 | 2                  | 9.25E-01 | 2                  | 6.38E-01 | 2                  | 6.38E-01 | 1                  | 6.13E-01 | 1                  | 6.13E-01 |
| TMC4    | 19  | 1                  | 6.53E-02 | 1                  | 6.53E-02 |                    |          |                    |          | 1                  | 6.13E-01 | 1                  | 6.13E-01 |
| PAQR6   | 1   | 2                  | 1.00E+00 | 2                  | 1.00E+00 | 2                  | 6.99E-01 | 2                  | 6.99E-01 | 1                  | 6.13E-01 | 1                  | 6.13E-01 |
| KLHL3   | 5   | 1                  | 6.53E-02 | 1                  | 6.53E-02 |                    |          |                    |          | 1                  | 6.13E-01 | 1                  | 6.13E-01 |
| ELP3    | 8   | 2                  | 5.76E-01 | 2                  | 5.76E-01 | 2                  | 6.14E-01 | 2                  | 6.14E-01 |                    |          |                    |          |
| SPTBN5  | 15  | 26                 | 4.64E-01 | 27                 | 5.96E-01 | 22                 | 7.97E-01 | 23                 | 6.14E-01 | 15                 | 9.15E-01 | 16                 | 8.09E-01 |
| SLC29A1 | 6   | 2                  | 5.78E-01 | 2                  | 5.78E-01 | 2                  | 6.14E-01 | 2                  | 6.14E-01 |                    |          |                    |          |
| GREB1L  | 18  | 4                  | 3.13E-01 | 4                  | 3.13E-01 | 2                  | 6.14E-01 | 2                  | 6.14E-01 | 2                  | 6.37E-01 | 2                  | 6.37E-01 |
| ESD     | 13  | 2                  | 5.74E-01 | 2                  | 5.74E-01 | 2                  | 6.14E-01 | 2                  | 6.14E-01 |                    |          |                    |          |
| GLG1    | 16  | 2                  | 5.69E-01 | 2                  | 5.69E-01 | 2                  | 6.14E-01 | 2                  | 6.14E-01 |                    |          |                    |          |
| SELPLG  | 12  | 5                  | 9.28E-01 | 5                  | 9.28E-01 | 4                  | 6.14E-01 | 4                  | 6.14E-01 | 2                  | 6.28E-01 | 2                  | 6.28E-01 |
| GRAMD3  | 5   | 2                  | 5.88E-01 | 2                  | 5.88E-01 | 2                  | 6.14E-01 | 2                  | 6.14E-01 |                    |          |                    |          |
| TMX2    | 11  | 3                  | 1.89E-01 | 3                  | 1.89E-01 | 1                  | 1.00E+00 | 1                  | 1.00E+00 | 2                  | 6.14E-01 | 2                  | 6.14E-01 |
| ORC4    | 2   | 3                  | 5.75E-01 | 3                  | 5.75E-01 | 2                  | 6.14E-01 | 2                  | 6.14E-01 | 1                  | 6.51E-01 | 1                  | 6.51E-01 |
| PHGDH   | 1   | 2                  | 9.21E-01 | 2                  | 9.21E-01 | 2                  | 6.14E-01 | 2                  | 6.14E-01 | 1                  | 6.44E-01 | 1                  | 6.44E-01 |
| PDZD2   | 5   | 12                 | 4.54E-01 | 12                 | 4.54E-01 | 12                 | 1.00E+00 | 12                 | 1.00E+00 | 4                  | 6.14E-01 | 4                  | 6.14E-01 |
| TAF1L   | 9   | 11                 | 3.38E-01 | 11                 | 3.38E-01 | 7                  | 6.14E-01 | 7                  | 6.14E-01 | 8                  | 6.60E-01 | 8                  | 6.60E-01 |
| OR6C4   | 12  | 3                  | 7.92E-01 | 3                  | 7.92E-01 | 2                  | 6.14E-01 | 2                  | 6.14E-01 | 2                  | 6.41E-01 | 2                  | 6.41E-01 |
| SLC5A2  | 16  | 2                  | 5.41E-01 | 2                  | 5.41E-01 | 2                  | 6.15E-01 | 2                  | 6.15E-01 |                    |          |                    |          |
| TES     | 7   | 3                  | 7.48E-01 | 3                  | 7.48E-01 | 2                  | 6.15E-01 | 2                  | 6.15E-01 | 2                  | 6.35E-01 | 2                  | 6.35E-01 |
| THRSP   | 11  | 2                  | 5.80E-01 | 2                  | 5.80E-01 | 2                  | 6.15E-01 | 2                  | 6.15E-01 |                    |          |                    |          |
| TAPBP   | 6   | 2                  | 9.22E-01 | 2                  | 9.22E-01 | 2                  | 6.15E-01 | 2                  | 6.15E-01 | 1                  | 6.34E-01 | 1                  | 6.34E-01 |
| CENPU   | 4   | 3                  | 7.19E-01 | 3                  | 7.19E-01 | 2                  | 6.15E-01 | 2                  | 6.15E-01 | 1                  | 6.48E-01 | 1                  | 6.48E-01 |
| STYX    | 14  | 2                  | 5.73E-01 | 2                  | 5.73E-01 | 2                  | 6.15E-01 | 2                  | 6.15E-01 |                    |          |                    |          |
| GJB3    | 1   | 5                  | 2.62E-01 | 5                  | 2.62E-01 | 4                  | 6.15E-01 | 4                  | 6.15E-01 | 2                  | 1.00E+00 | 2                  | 1.00E+00 |
| C3orf52 | 3   | 2                  | 1.00E+00 | 2                  | 1.00E+00 | 2                  | 6.15E-01 | 2                  | 6.15E-01 | 1                  | 6.28E-01 | 1                  | 6.28E-01 |
| ZC3H7B  | 22  | 2                  | 5.83E-01 | 2                  | 5.83E-01 | 2                  | 6.15E-01 | 2                  | 6.15E-01 |                    |          |                    |          |
| FGFBP2  | 4   | 2                  | 5.61E-01 | 2                  | 5.61E-01 | 2                  | 6.15E-01 | 2                  | 6.15E-01 |                    |          |                    |          |
| TEDDM1  | 1   | 2                  | 5.71E-01 | 2                  | 5.71E-01 | 2                  | 6.15E-01 | 2                  | 6.15E-01 |                    |          |                    |          |
| GATA4   | 8   | 2                  | 5.81E-01 | 2                  | 5.81E-01 | 2                  | 6.15E-01 | 2                  | 6.15E-01 |                    |          |                    |          |
| PRRT3   | 3   | 2                  | 5.83E-01 | 2                  | 5.83E-01 | 2                  | 6.15E-01 | 2                  | 6.15E-01 |                    |          |                    |          |
| FSIP2   | 2   | 2                  | 5.75E-01 | 2                  | 5.75E-01 | 2                  | 6.15E-01 | 2                  | 6.15E-01 |                    |          |                    |          |
| RABEP2  | 16  | 2                  | 9.23E-01 | 2                  | 9.23E-01 | 2                  | 6.15E-01 | 2                  | 6.15E-01 | 1                  | 6.98E-01 | 1                  | 6.98E-01 |
| LMCD1   | 3   | 4                  | 4.20E-01 | 4                  | 4.20E-01 | 2                  | 6.15E-01 | 2                  | 6.15E-01 | 2                  | 6.28E-01 | 2                  | 6.28E-01 |
| TJP2    | 9   | 3                  | 7.71E-01 | 3                  | 7.71E-01 | 2                  | 6.15E-01 | 2                  | 6.15E-01 | 1                  | 6.17E-01 | 1                  | 6.17E-01 |
| COL11A1 | 1   | 4                  | 3.29E-01 | 4                  | 3.29E-01 | 2                  | 6.15E-01 | 2                  | 6.15E-01 | 2                  | 6.38E-01 | 2                  | 6.38E-01 |
| C1orf94 | 1   | 3                  | 6.39E-01 | 3                  | 6.39E-01 | 2                  | 6.15E-01 | 2                  | 6.15E-01 | 1                  | 6.41E-01 | 1                  | 6.41E-01 |
| DZIP3   | 3   | 4                  | 7.29E-01 | 4                  | 7.29E-01 | 3                  | 6.15E-01 | 3                  | 6.15E-01 | 2                  | 6.59E-01 | 2                  | 6.59E-01 |



| SetID     | Chr | ADEH- vs NA        |          |                    |          | ADEH+ vs ADEH-     |          |                    |          | ADEH+ vs NA        |          |                    |          |
|-----------|-----|--------------------|----------|--------------------|----------|--------------------|----------|--------------------|----------|--------------------|----------|--------------------|----------|
|           |     | rare novel         |          | all                |          | rare novel         |          | all                |          | rare novel         |          | all                |          |
|           |     | N variants in test | p-value  | N variants in test | p-value  | N variants in test | p-value  | N variants in test | p-value  | N variants in test | p-value  | N variants in test | p-value  |
| C17orf105 | 17  | 2                  | 5.65E-01 | 2                  | 5.65E-01 | 2                  | 6.17E-01 | 2                  | 6.17E-01 |                    |          |                    |          |
| MBOAT2    | 2   | 2                  | 1.00E+00 | 2                  | 1.00E+00 | 2                  | 6.26E-01 | 2                  | 6.26E-01 | 1                  | 6.17E-01 | 1                  | 6.17E-01 |
| ZNF532    | 18  | 2                  | 1.00E+00 | 2                  | 1.00E+00 | 2                  | 6.29E-01 | 2                  | 6.29E-01 | 1                  | 6.17E-01 | 1                  | 6.17E-01 |
| IQCG      | 3   | 3                  | 9.06E-01 | 4                  | 9.06E-01 | 3                  | 6.91E-01 | 4                  | 6.34E-01 | 1                  | 6.17E-01 | 2                  | 6.83E-01 |
| SCMH1     | 1   | 1                  | 9.01E-02 | 1                  | 9.01E-02 |                    |          |                    |          | 1                  | 6.17E-01 | 1                  | 6.17E-01 |
| NUDT9     | 4   | 1                  | 9.01E-02 | 1                  | 9.01E-02 |                    |          |                    |          | 1                  | 6.17E-01 | 1                  | 6.17E-01 |
| TRAF2     | 9   | 2                  | 7.07E-01 | 2                  | 7.07E-01 | 2                  | 6.78E-01 | 2                  | 6.78E-01 | 1                  | 6.17E-01 | 1                  | 6.17E-01 |
| ATP1B1    | 1   | 2                  | 5.85E-01 | 2                  | 5.85E-01 | 2                  | 6.17E-01 | 2                  | 6.17E-01 |                    |          |                    |          |
| FAM219B   | 15  | 2                  | 3.21E-01 | 2                  | 3.21E-01 | 2                  | 6.17E-01 | 2                  | 6.17E-01 |                    |          |                    |          |
| ZKSCAN7   | 3   | 2                  | 5.82E-01 | 2                  | 5.82E-01 | 2                  | 6.17E-01 | 2                  | 6.17E-01 |                    |          |                    |          |
| ETFA      | 15  | 1                  | 8.44E-02 | 2                  | 5.14E-01 |                    |          | 1                  | 7.65E-01 | 1                  | 6.17E-01 | 2                  | 6.84E-01 |
| EGR1      | 5   | 1                  | 8.44E-02 | 1                  | 8.44E-02 |                    |          |                    |          | 1                  | 6.17E-01 | 1                  | 6.17E-01 |
| BTBD8     | 1   | 1                  | 8.44E-02 | 1                  | 8.44E-02 |                    |          |                    |          | 1                  | 6.17E-01 | 1                  | 6.17E-01 |
| PPP1R12A  | 12  | 1                  | 8.44E-02 | 1                  | 8.44E-02 |                    |          |                    |          | 1                  | 6.17E-01 | 1                  | 6.17E-01 |
| F11       | 4   | 3                  | 9.08E-01 | 3                  | 9.08E-01 | 3                  | 7.76E-01 | 3                  | 7.76E-01 | 1                  | 6.17E-01 | 1                  | 6.17E-01 |
| PRPH2     | 6   | 1                  | 8.44E-02 | 1                  | 8.44E-02 |                    |          |                    |          | 1                  | 6.17E-01 | 1                  | 6.17E-01 |
| NPRL2     | 3   | 1                  | 8.44E-02 | 1                  | 8.44E-02 |                    |          |                    |          | 1                  | 6.17E-01 | 1                  | 6.17E-01 |
| RSAD2     | 2   | 3                  | 7.71E-01 | 3                  | 7.71E-01 | 2                  | 6.17E-01 | 2                  | 6.17E-01 | 1                  | 6.17E-01 | 1                  | 6.17E-01 |
| ABCG2     | 4   | 4                  | 2.17E-01 | 4                  | 2.17E-01 | 4                  | 6.17E-01 | 4                  | 6.17E-01 |                    |          |                    |          |
| CDC20     | 1   | 2                  | 5.77E-01 | 2                  | 5.77E-01 | 2                  | 6.17E-01 | 2                  | 6.17E-01 |                    |          |                    |          |
| GOLGA3    | 12  | 2                  | 1.77E-01 | 2                  | 1.77E-01 | 1                  | 1.00E+00 | 1                  | 1.00E+00 | 1                  | 6.17E-01 | 1                  | 6.17E-01 |
| ACSF2     | 17  | 2                  | 1.00E+00 | 2                  | 1.00E+00 | 2                  | 6.46E-01 | 2                  | 6.46E-01 | 1                  | 6.17E-01 | 1                  | 6.17E-01 |
| ACHE      | 7   | 2                  | 8.79E-01 | 2                  | 8.79E-01 | 2                  | 7.61E-01 | 2                  | 7.61E-01 | 1                  | 6.17E-01 | 1                  | 6.17E-01 |
| B3GNTL1   | 17  | 1                  | 1.01E-01 | 1                  | 1.01E-01 |                    |          |                    |          | 1                  | 6.17E-01 | 1                  | 6.17E-01 |
| OSGEP     | 14  | 1                  | 1.01E-01 | 1                  | 1.01E-01 |                    |          |                    |          | 1                  | 6.17E-01 | 1                  | 6.17E-01 |
| COA3      | 17  | 2                  | 5.80E-01 | 2                  | 5.80E-01 | 2                  | 6.17E-01 | 2                  | 6.17E-01 |                    |          |                    |          |
| RFX8      | 2   | 2                  | 5.50E-01 | 2                  | 5.50E-01 | 2                  | 6.17E-01 | 2                  | 6.17E-01 |                    |          |                    |          |
| GPX7      | 1   | 4                  | 2.55E-01 | 4                  | 2.55E-01 | 2                  | 6.17E-01 | 2                  | 6.17E-01 | 2                  | 6.41E-01 | 2                  | 6.41E-01 |
| CAMK1G    | 1   | 2                  | 3.06E-01 | 2                  | 3.06E-01 | 2                  | 6.17E-01 | 2                  | 6.17E-01 |                    |          |                    |          |
| CHRNA5    | 15  | 5                  | 3.81E-01 | 5                  | 3.81E-01 | 5                  | 6.17E-01 | 5                  | 6.17E-01 | 2                  | 1.00E+00 | 2                  | 1.00E+00 |
| F2R       | 5   | 3                  | 2.22E-01 | 3                  | 2.22E-01 | 3                  | 6.17E-01 | 3                  | 6.17E-01 |                    |          |                    |          |
| TKTL2     | 4   | 3                  | 5.96E-01 | 3                  | 5.96E-01 | 2                  | 6.17E-01 | 2                  | 6.17E-01 | 1                  | 6.35E-01 | 1                  | 6.35E-01 |
| ALDH2     | 12  | 4                  | 3.79E-01 | 4                  | 3.79E-01 | 2                  | 6.17E-01 | 2                  | 6.17E-01 | 2                  | 6.25E-01 | 2                  | 6.25E-01 |
| KIAA0141  | 5   | 2                  | 5.76E-01 | 2                  | 5.76E-01 | 2                  | 6.17E-01 | 2                  | 6.17E-01 |                    |          |                    |          |
| NOXRED1   | 14  | 1                  | 8.80E-02 | 1                  | 8.80E-02 |                    |          |                    |          | 1                  | 6.17E-01 | 1                  | 6.17E-01 |
| TPRG1     | 3   | 1                  | 8.80E-02 | 1                  | 8.80E-02 |                    |          |                    |          | 1                  | 6.17E-01 | 1                  | 6.17E-01 |
| BYSL      | 6   | 4                  | 7.47E-01 | 4                  | 7.47E-01 | 4                  | 6.18E-01 | 4                  | 6.18E-01 | 1                  | 6.17E-01 | 1                  | 6.17E-01 |
| AQR       | 15  | 1                  | 8.80E-02 | 1                  | 8.80E-02 |                    |          |                    |          | 1                  | 6.17E-01 | 1                  | 6.17E-01 |
| DZIP1L    | 3   | 4                  | 3.36E-01 | 4                  | 3.36E-01 | 2                  | 6.17E-01 | 2                  | 6.17E-01 | 2                  | 6.44E-01 | 2                  | 6.44E-01 |
| LHPP      | 10  | 2                  | 5.70E-01 | 2                  | 5.70E-01 | 2                  | 6.17E-01 | 2                  | 6.17E-01 |                    |          |                    |          |
| PPP1R16B  | 20  | 1                  | 7.39E-02 | 1                  | 7.39E-02 |                    |          |                    |          | 1                  | 6.17E-01 | 1                  | 6.17E-01 |
| DMPK      | 19  | 2                  | 7.82E-01 | 2                  | 7.82E-01 | 2                  | 7.20E-01 | 2                  | 7.20E-01 | 1                  | 6.17E-01 | 1                  | 6.17E-01 |
| OR5J2     | 11  | 1                  | 7.39E-02 | 1                  | 7.39E-02 |                    |          |                    |          | 1                  | 6.17E-01 | 1                  | 6.17E-01 |
| TRMT10A   | 4   | 4                  | 7.90E-01 | 4                  | 7.90E-01 | 3                  | 6.91E-01 | 3                  | 6.91E-01 | 1                  | 6.17E-01 | 1                  | 6.17E-01 |
| NADK      | 1   | 2                  | 9.22E-01 | 2                  | 9.22E-01 | 2                  | 6.32E-01 | 2                  | 6.32E-01 | 1                  | 6.17E-01 | 1                  | 6.17E-01 |
| TELO2     | 16  | 4                  | 8.13E-01 | 4                  | 8.13E-01 | 3                  | 7.54E-01 | 3                  | 7.54E-01 | 1                  | 6.17E-01 | 1                  | 6.17E-01 |
| CNP       | 17  | 3                  | 6.72E-01 | 3                  | 6.72E-01 | 2                  | 6.27E-01 | 2                  | 6.27E-01 | 1                  | 6.17E-01 | 1                  | 6.17E-01 |
| ARHGAP35  | 19  | 2                  | 9.13E-01 | 2                  | 9.13E-01 | 2                  | 6.18E-01 | 2                  | 6.18E-01 | 1                  | 6.18E-01 | 1                  | 6.18E-01 |

| SetID       | Chr | ADEH- vs NA        |          |                    |          | ADEH+ vs ADEH-     |          |                    |          | ADEH+ vs NA        |          |                    |          |
|-------------|-----|--------------------|----------|--------------------|----------|--------------------|----------|--------------------|----------|--------------------|----------|--------------------|----------|
|             |     | rare novel         |          | all                |          | rare novel         |          | all                |          | rare novel         |          | all                |          |
|             |     | N variants in test | p-value  | N variants in test | p-value  | N variants in test | p-value  | N variants in test | p-value  | N variants in test | p-value  | N variants in test | p-value  |
| HOMEZ       | 14  | 1                  | 8.48E-02 | 1                  | 8.48E-02 |                    |          |                    |          | 1                  | 6.18E-01 | 1                  | 6.18E-01 |
| ENAM        | 4   | 1                  | 8.48E-02 | 1                  | 8.48E-02 |                    |          |                    |          | 1                  | 6.18E-01 | 1                  | 6.18E-01 |
| CCBL1       | 9   | 1                  | 8.48E-02 | 1                  | 8.48E-02 |                    |          |                    |          | 1                  | 6.18E-01 | 1                  | 6.18E-01 |
| ENTPD4      | 8   | 1                  | 8.48E-02 | 1                  | 8.48E-02 |                    |          |                    |          | 1                  | 6.18E-01 | 1                  | 6.18E-01 |
| BRIX1       | 5   | 1                  | 8.48E-02 | 1                  | 8.48E-02 |                    |          |                    |          | 1                  | 6.18E-01 | 1                  | 6.18E-01 |
| CD1D        | 1   | 1                  | 8.48E-02 | 1                  | 8.48E-02 |                    |          |                    |          | 1                  | 6.18E-01 | 1                  | 6.18E-01 |
| TM7SF2      | 11  | 2                  | 9.13E-01 | 2                  | 9.13E-01 | 2                  | 6.25E-01 | 2                  | 6.25E-01 | 1                  | 6.18E-01 | 1                  | 6.18E-01 |
| TMEM215     | 9   | 1                  | 6.27E-02 | 1                  | 6.27E-02 |                    |          |                    |          | 1                  | 6.18E-01 | 1                  | 6.18E-01 |
| IWS1        | 2   | 1                  | 6.27E-02 | 1                  | 6.27E-02 |                    |          |                    |          | 1                  | 6.18E-01 | 1                  | 6.18E-01 |
| DEFB110     | 6   | 1                  | 6.27E-02 | 1                  | 6.27E-02 |                    |          |                    |          | 1                  | 6.18E-01 | 1                  | 6.18E-01 |
| LRRC19      | 9   | 1                  | 6.27E-02 | 1                  | 6.27E-02 |                    |          |                    |          | 1                  | 6.18E-01 | 1                  | 6.18E-01 |
| STK17B      | 2   | 2                  | 5.65E-01 | 2                  | 5.65E-01 | 2                  | 6.18E-01 | 2                  | 6.18E-01 |                    |          |                    |          |
| VWA3B       | 2   | 4                  | 6.16E-01 | 5                  | 5.30E-01 | 4                  | 6.68E-01 | 5                  | 6.49E-01 | 3                  | 1.00E+00 | 4                  | 6.18E-01 |
| TMEM41B     | 11  | 2                  | 5.77E-01 | 2                  | 5.77E-01 | 2                  | 6.18E-01 | 2                  | 6.18E-01 |                    |          |                    |          |
| GUSB        | 7   | 2                  | 5.80E-01 | 2                  | 5.80E-01 | 2                  | 6.18E-01 | 2                  | 6.18E-01 |                    |          |                    |          |
| ZFYVE21     | 14  | 1                  | 7.57E-02 | 1                  | 7.57E-02 |                    |          |                    |          | 1                  | 6.18E-01 | 1                  | 6.18E-01 |
| USP34       | 2   | 3                  | 6.93E-01 | 3                  | 6.93E-01 | 2                  | 6.20E-01 | 2                  | 6.20E-01 | 1                  | 6.18E-01 | 1                  | 6.18E-01 |
| CDCA8       | 1   | 1                  | 7.57E-02 | 1                  | 7.57E-02 |                    |          |                    |          | 1                  | 6.18E-01 | 1                  | 6.18E-01 |
| LACRT       | 12  | 1                  | 7.57E-02 | 1                  | 7.57E-02 |                    |          |                    |          | 1                  | 6.18E-01 | 1                  | 6.18E-01 |
| HMG20A      | 15  | 1                  | 7.57E-02 | 1                  | 7.57E-02 |                    |          |                    |          | 1                  | 6.18E-01 | 1                  | 6.18E-01 |
| RMDN3       | 15  | 1                  | 6.90E-02 | 1                  | 6.90E-02 |                    |          |                    |          | 1                  | 6.18E-01 | 1                  | 6.18E-01 |
| ZNF511      | 10  | 1                  | 6.90E-02 | 1                  | 6.90E-02 |                    |          |                    |          | 1                  | 6.18E-01 | 1                  | 6.18E-01 |
| RASAL2      | 1   | 1                  | 6.90E-02 | 1                  | 6.90E-02 |                    |          |                    |          | 1                  | 6.18E-01 | 1                  | 6.18E-01 |
| ACOT12      | 5   | 3                  | 7.51E-01 | 3                  | 7.51E-01 | 3                  | 8.31E-01 | 3                  | 8.31E-01 | 1                  | 6.18E-01 | 1                  | 6.18E-01 |
| MTMR7       | 8   | 1                  | 6.90E-02 | 1                  | 6.90E-02 |                    |          |                    |          | 1                  | 6.18E-01 | 1                  | 6.18E-01 |
| KCNJ15      | 21  | 1                  | 6.90E-02 | 1                  | 6.90E-02 |                    |          |                    |          | 1                  | 6.18E-01 | 1                  | 6.18E-01 |
| BHMT2       | 5   | 1                  | 6.90E-02 | 1                  | 6.90E-02 |                    |          |                    |          | 1                  | 6.18E-01 | 1                  | 6.18E-01 |
| CPNE6       | 14  | 1                  | 6.90E-02 | 1                  | 6.90E-02 |                    |          |                    |          | 1                  | 6.18E-01 | 1                  | 6.18E-01 |
| DDAH1       | 1   | 3                  | 6.85E-01 | 3                  | 6.85E-01 | 2                  | 6.18E-01 | 2                  | 6.18E-01 | 2                  | 6.35E-01 | 2                  | 6.35E-01 |
| COG7        | 16  | 2                  | 5.74E-01 | 2                  | 5.74E-01 | 2                  | 6.18E-01 | 2                  | 6.18E-01 |                    |          |                    |          |
| CDKL2       | 4   | 2                  | 5.77E-01 | 2                  | 5.77E-01 | 2                  | 6.18E-01 | 2                  | 6.18E-01 |                    |          |                    |          |
| C11orf54    | 11  | 1                  | 7.28E-02 | 1                  | 7.28E-02 |                    |          |                    |          | 1                  | 6.18E-01 | 1                  | 6.18E-01 |
| PBXIP1      | 1   | 2                  | 1.00E+00 | 2                  | 1.00E+00 | 2                  | 7.05E-01 | 2                  | 7.05E-01 | 1                  | 6.18E-01 | 1                  | 6.18E-01 |
| SMTNL1      | 11  | 1                  | 7.28E-02 | 1                  | 7.28E-02 |                    |          |                    |          | 1                  | 6.18E-01 | 1                  | 6.18E-01 |
| VAT1        | 17  | 1                  | 7.28E-02 | 1                  | 7.28E-02 |                    |          |                    |          | 1                  | 6.18E-01 | 1                  | 6.18E-01 |
| MCTP1       | 5   | 1                  | 7.28E-02 | 1                  | 7.28E-02 |                    |          |                    |          | 1                  | 6.18E-01 | 1                  | 6.18E-01 |
| SLC9A5      | 16  | 1                  | 7.28E-02 | 1                  | 7.28E-02 |                    |          |                    |          | 1                  | 6.18E-01 | 1                  | 6.18E-01 |
| CTNNA2      | 2   | 1                  | 7.28E-02 | 1                  | 7.28E-02 |                    |          |                    |          | 1                  | 6.18E-01 | 1                  | 6.18E-01 |
| INCA1       | 17  | 3                  | 2.70E-01 | 3                  | 2.70E-01 | 2                  | 1.00E+00 | 2                  | 1.00E+00 | 1                  | 6.18E-01 | 1                  | 6.18E-01 |
| C2orf49     | 2   | 2                  | 5.81E-01 | 2                  | 5.81E-01 | 2                  | 6.18E-01 | 2                  | 6.18E-01 |                    |          |                    |          |
| PARP16      | 15  | 2                  | 5.81E-01 | 2                  | 5.81E-01 | 2                  | 6.18E-01 | 2                  | 6.18E-01 |                    |          |                    |          |
| PHF21B      | 22  | 3                  | 5.68E-01 | 3                  | 5.68E-01 | 2                  | 6.18E-01 | 2                  | 6.18E-01 | 2                  | 6.19E-01 | 2                  | 6.19E-01 |
| MGC57346-CR | 17  | 1                  | 8.19E-02 | 1                  | 8.19E-02 |                    |          |                    |          | 1                  | 6.18E-01 | 1                  | 6.18E-01 |
| CRHR1       | 17  | 1                  | 8.19E-02 | 1                  | 8.19E-02 |                    |          |                    |          | 1                  | 6.18E-01 | 1                  | 6.18E-01 |
| GPR18       | 13  | 1                  | 8.19E-02 | 1                  | 8.19E-02 |                    |          |                    |          | 1                  | 6.18E-01 | 1                  | 6.18E-01 |
| C14orf37    | 14  | 1                  | 8.19E-02 | 1                  | 8.19E-02 |                    |          |                    |          | 1                  | 6.18E-01 | 1                  | 6.18E-01 |
| LCN10       | 9   | 1                  | 8.19E-02 | 2                  | 9.67E-03 |                    |          | 1                  | 6.39E-01 | 1                  | 6.18E-01 | 2                  | 6.69E-01 |
| CD300LB     | 17  | 1                  | 8.19E-02 | 1                  | 8.19E-02 |                    |          |                    |          | 1                  | 6.18E-01 | 1                  | 6.18E-01 |





| SetID    | Chr | ADEH- vs NA        |          |                    |          | ADEH+ vs ADEH-     |          |                    |          | ADEH+ vs NA        |          |                    |          |
|----------|-----|--------------------|----------|--------------------|----------|--------------------|----------|--------------------|----------|--------------------|----------|--------------------|----------|
|          |     | rarenovel          |          | all                |          | rarenovel          |          | all                |          | rarenovel          |          | all                |          |
|          |     | N variants in test | p-value  | N variants in test | p-value  | N variants in test | p-value  | N variants in test | p-value  | N variants in test | p-value  | N variants in test | p-value  |
| PROM1    | 4   | 1                  | 8.60E-02 | 1                  | 8.60E-02 |                    |          |                    |          | 1                  | 6.19E-01 | 1                  | 6.19E-01 |
| NUDT16   | 3   | 1                  | 8.60E-02 | 1                  | 8.60E-02 |                    |          |                    |          | 1                  | 6.19E-01 | 1                  | 6.19E-01 |
| ERCC8    | 5   | 4                  | 3.42E-01 | 4                  | 3.42E-01 | 2                  | 6.20E-01 | 2                  | 6.20E-01 | 2                  | 6.36E-01 | 2                  | 6.36E-01 |
| RAPGEFL1 | 17  | 2                  | 5.75E-01 | 2                  | 5.75E-01 | 2                  | 6.20E-01 | 2                  | 6.20E-01 |                    |          |                    |          |
| CPO      | 2   | 2                  | 5.59E-01 | 2                  | 5.59E-01 | 2                  | 6.20E-01 | 2                  | 6.20E-01 |                    |          |                    |          |
| ADORA2B  | 17  | 2                  | 5.78E-01 | 2                  | 5.78E-01 | 2                  | 6.20E-01 | 2                  | 6.20E-01 |                    |          |                    |          |
| SLCO4A1  | 20  | 2                  | 5.73E-01 | 2                  | 5.73E-01 | 2                  | 6.20E-01 | 2                  | 6.20E-01 |                    |          |                    |          |
| NGDN     | 14  | 3                  | 6.48E-01 | 3                  | 6.48E-01 | 2                  | 6.20E-01 | 2                  | 6.20E-01 | 2                  | 6.40E-01 | 2                  | 6.40E-01 |
| ZNF622   | 5   | 2                  | 5.79E-01 | 2                  | 5.79E-01 | 2                  | 6.20E-01 | 2                  | 6.20E-01 |                    |          |                    |          |
| PIGP     | 21  | 3                  | 2.11E-01 | 3                  | 2.11E-01 | 3                  | 6.20E-01 | 3                  | 6.20E-01 |                    |          |                    |          |
| FMNL3    | 12  | 4                  | 3.02E-01 | 4                  | 3.02E-01 | 2                  | 6.20E-01 | 2                  | 6.20E-01 | 2                  | 6.36E-01 | 2                  | 6.36E-01 |
| PDZD8    | 10  | 2                  | 5.68E-01 | 2                  | 5.68E-01 | 2                  | 6.20E-01 | 2                  | 6.20E-01 |                    |          |                    |          |
| RAF1     | 3   | 2                  | 5.76E-01 | 2                  | 5.76E-01 | 2                  | 6.20E-01 | 2                  | 6.20E-01 |                    |          |                    |          |
| KIF22    | 16  | 2                  | 9.14E-01 | 2                  | 9.14E-01 | 2                  | 6.20E-01 | 2                  | 6.20E-01 | 1                  | 6.47E-01 | 1                  | 6.47E-01 |
| FCRLB    | 1   | 2                  | 1.92E-02 | 2                  | 1.92E-02 |                    |          |                    |          | 2                  | 6.20E-01 | 2                  | 6.20E-01 |
| IZUMO3   | 9   | 1                  | 5.70E-02 | 1                  | 5.70E-02 |                    |          |                    |          | 1                  | 6.20E-01 | 1                  | 6.20E-01 |
| PPFIBP2  | 11  | 3                  | 4.38E-01 | 3                  | 4.38E-01 | 2                  | 7.52E-01 | 2                  | 7.52E-01 | 1                  | 6.20E-01 | 1                  | 6.20E-01 |
| SH2B1    | 16  | 1                  | 5.70E-02 | 1                  | 5.70E-02 |                    |          |                    |          | 1                  | 6.20E-01 | 1                  | 6.20E-01 |
| VPS26A   | 10  | 2                  | 1.84E-02 | 2                  | 1.84E-02 |                    |          |                    |          | 2                  | 6.20E-01 | 2                  | 6.20E-01 |
| DGKZ     | 11  | 3                  | 6.57E-01 | 3                  | 6.57E-01 | 2                  | 6.20E-01 | 2                  | 6.20E-01 | 1                  | 6.29E-01 | 1                  | 6.29E-01 |
| NCKIPSD  | 3   | 2                  | 1.65E-02 | 2                  | 1.65E-02 |                    |          |                    |          | 2                  | 6.20E-01 | 2                  | 6.20E-01 |
| GRIP1    | 12  | 5                  | 6.20E-01 | 5                  | 6.20E-01 | 3                  | 7.65E-01 | 3                  | 7.65E-01 | 2                  | 6.20E-01 | 2                  | 6.20E-01 |
| MEX3C    | 18  | 2                  | 5.72E-01 | 2                  | 5.72E-01 | 2                  | 6.20E-01 | 2                  | 6.20E-01 |                    |          |                    |          |
| ATXN7L2  | 1   | 2                  | 1.90E-02 | 2                  | 1.90E-02 |                    |          |                    |          | 2                  | 6.21E-01 | 2                  | 6.21E-01 |
| EXOC6    | 10  | 2                  | 5.80E-01 | 2                  | 5.80E-01 | 2                  | 6.21E-01 | 2                  | 6.21E-01 |                    |          |                    |          |
| OR5AU1   | 14  | 2                  | 9.28E-01 | 3                  | 9.28E-01 | 2                  | 6.21E-01 | 3                  | 6.41E-01 | 1                  | 6.42E-01 | 2                  | 6.56E-01 |
| AP1B1    | 22  | 2                  | 1.44E-02 | 2                  | 1.44E-02 |                    |          |                    |          | 2                  | 6.21E-01 | 2                  | 6.21E-01 |
| OSBPL6   | 2   | 5                  | 4.77E-01 | 5                  | 4.77E-01 | 3                  | 7.67E-01 | 3                  | 7.67E-01 | 2                  | 6.21E-01 | 2                  | 6.21E-01 |
| ARNT2    | 15  | 3                  | 6.56E-01 | 3                  | 6.56E-01 | 2                  | 6.21E-01 | 2                  | 6.21E-01 | 1                  | 6.47E-01 | 1                  | 6.47E-01 |
| EXOC4    | 7   | 3                  | 6.81E-01 | 3                  | 6.81E-01 | 2                  | 6.21E-01 | 2                  | 6.21E-01 | 1                  | 6.30E-01 | 1                  | 6.30E-01 |
| TRPC4AP  | 20  | 3                  | 7.21E-01 | 3                  | 7.21E-01 | 2                  | 6.21E-01 | 2                  | 6.21E-01 | 1                  | 6.22E-01 | 1                  | 6.22E-01 |
| GNS      | 12  | 2                  | 5.69E-01 | 2                  | 5.69E-01 | 2                  | 6.21E-01 | 2                  | 6.21E-01 |                    |          |                    |          |
| OSBPL3   | 7   | 3                  | 3.28E-01 | 3                  | 3.28E-01 | 3                  | 6.21E-01 | 3                  | 6.21E-01 |                    |          |                    |          |
| MLLT3    | 9   | 2                  | 5.79E-01 | 2                  | 5.79E-01 | 2                  | 6.21E-01 | 2                  | 6.21E-01 |                    |          |                    |          |
| MYEOV    | 11  | 2                  | 5.69E-01 | 2                  | 5.69E-01 | 2                  | 6.21E-01 | 2                  | 6.21E-01 |                    |          |                    |          |
| OR6T1    | 11  | 2                  | 5.72E-01 | 2                  | 5.72E-01 | 2                  | 6.21E-01 | 2                  | 6.21E-01 |                    |          |                    |          |
| KIFC3    | 16  | 3                  | 6.55E-01 | 3                  | 6.55E-01 | 2                  | 6.21E-01 | 2                  | 6.21E-01 | 1                  | 6.43E-01 | 1                  | 6.43E-01 |
| RBPMS    | 8   | 2                  | 5.71E-01 | 2                  | 5.71E-01 | 2                  | 6.21E-01 | 2                  | 6.21E-01 |                    |          |                    |          |
| FAM19A4  | 3   | 2                  | 1.63E-02 | 2                  | 1.63E-02 |                    |          |                    |          | 2                  | 6.21E-01 | 2                  | 6.21E-01 |
| LURAP1   | 1   | 2                  | 5.68E-01 | 2                  | 5.68E-01 | 2                  | 6.21E-01 | 2                  | 6.21E-01 |                    |          |                    |          |
| EIF2A    | 3   | 4                  | 3.43E-01 | 4                  | 3.43E-01 | 2                  | 6.21E-01 | 2                  | 6.21E-01 | 2                  | 6.53E-01 | 2                  | 6.53E-01 |
| ZC3H11A  | 1   | 2                  | 5.84E-01 | 2                  | 5.84E-01 | 2                  | 6.21E-01 | 2                  | 6.21E-01 |                    |          |                    |          |
| AARS     | 16  | 7                  | 5.48E-01 | 7                  | 5.48E-01 | 5                  | 1.00E+00 | 5                  | 1.00E+00 | 4                  | 6.21E-01 | 4                  | 6.21E-01 |
| RNF40    | 16  | 4                  | 2.18E-01 | 4                  | 2.18E-01 | 4                  | 6.21E-01 | 4                  | 6.21E-01 |                    |          |                    |          |
| TESK2    | 1   | 3                  | 6.78E-01 | 3                  | 6.78E-01 | 2                  | 6.45E-01 | 2                  | 6.45E-01 | 2                  | 6.22E-01 | 2                  | 6.22E-01 |
| PLA2G6   | 22  | 2                  | 3.28E-01 | 2                  | 3.28E-01 | 2                  | 6.22E-01 | 2                  | 6.22E-01 |                    |          |                    |          |
| C1orf185 | 1   | 2                  | 4.98E-01 | 2                  | 4.98E-01 | 2                  | 6.22E-01 | 2                  | 6.22E-01 | 2                  | 6.55E-01 | 2                  | 6.55E-01 |
| TAF4B    | 18  | 2                  | 5.70E-01 | 2                  | 5.70E-01 | 2                  | 6.22E-01 | 2                  | 6.22E-01 |                    |          |                    |          |

| SetID     | Chr | ADEH- vs NA        |          |                    |          | ADEH+ vs ADEH-     |          |                    |          | ADEH+ vs NA        |          |                    |          |
|-----------|-----|--------------------|----------|--------------------|----------|--------------------|----------|--------------------|----------|--------------------|----------|--------------------|----------|
|           |     | rare novel         |          | all                |          | rare novel         |          | all                |          | rare novel         |          | all                |          |
|           |     | N variants in test | p-value  | N variants in test | p-value  | N variants in test | p-value  | N variants in test | p-value  | N variants in test | p-value  | N variants in test | p-value  |
| FN1       | 2   | 11                 | 5.64E-01 | 11                 | 5.64E-01 | 9                  | 8.11E-01 | 9                  | 8.11E-01 | 6                  | 6.22E-01 | 6                  | 6.22E-01 |
| HOXA7     | 7   | 1                  | 8.07E-02 | 1                  | 8.07E-02 |                    |          |                    |          | 1                  | 6.22E-01 | 1                  | 6.22E-01 |
| HNRNPM    | 19  | 1                  | 8.07E-02 | 1                  | 8.07E-02 |                    |          |                    |          | 1                  | 6.22E-01 | 1                  | 6.22E-01 |
| PPDPF     | 20  | 1                  | 8.07E-02 | 1                  | 8.07E-02 |                    |          |                    |          | 1                  | 6.22E-01 | 1                  | 6.22E-01 |
| CA1       | 8   | 3                  | 1.00E+00 | 3                  | 1.00E+00 | 3                  | 7.57E-01 | 3                  | 7.57E-01 | 1                  | 6.22E-01 | 1                  | 6.22E-01 |
| ANKS6     | 9   | 4                  | 8.51E-01 | 4                  | 8.51E-01 | 3                  | 6.53E-01 | 3                  | 6.53E-01 | 2                  | 6.22E-01 | 2                  | 6.22E-01 |
| MRVI1     | 11  | 4                  | 6.70E-01 | 4                  | 6.70E-01 | 4                  | 1.00E+00 | 4                  | 1.00E+00 | 1                  | 6.22E-01 | 1                  | 6.22E-01 |
| HFM1      | 1   | 3                  | 6.36E-01 | 3                  | 6.36E-01 | 2                  | 6.22E-01 | 2                  | 6.22E-01 | 1                  | 6.46E-01 | 1                  | 6.46E-01 |
| CREB3L3   | 19  | 4                  | 7.95E-01 | 4                  | 7.95E-01 | 3                  | 7.75E-01 | 3                  | 7.75E-01 | 2                  | 6.22E-01 | 2                  | 6.22E-01 |
| TMEM101   | 17  | 2                  | 5.70E-01 | 2                  | 5.70E-01 | 2                  | 6.22E-01 | 2                  | 6.22E-01 |                    |          |                    |          |
| AUH       | 9   | 2                  | 5.70E-01 | 2                  | 5.70E-01 | 2                  | 6.22E-01 | 2                  | 6.22E-01 |                    |          |                    |          |
| LATS2     | 13  | 2                  | 5.68E-01 | 2                  | 5.68E-01 | 2                  | 6.22E-01 | 2                  | 6.22E-01 |                    |          |                    |          |
| DCD       | 12  |                    |          | 1                  | 4.83E-01 |                    |          | 1                  | 8.84E-01 |                    |          | 1                  | 6.22E-01 |
| NDUFA13   | 19  | 2                  | 5.74E-01 | 2                  | 5.74E-01 | 2                  | 6.22E-01 | 2                  | 6.22E-01 |                    |          |                    |          |
| ADAM11    | 17  | 2                  | 5.71E-01 | 2                  | 5.71E-01 | 2                  | 6.22E-01 | 2                  | 6.22E-01 |                    |          |                    |          |
| JAM2      | 21  | 3                  | 7.00E-01 | 3                  | 7.00E-01 | 2                  | 6.22E-01 | 2                  | 6.22E-01 | 1                  | 6.56E-01 | 1                  | 6.56E-01 |
| CHD5      | 1   | 1                  | 7.12E-02 | 1                  | 7.12E-02 |                    |          |                    |          | 1                  | 6.22E-01 | 1                  | 6.22E-01 |
| C2        | 6   | 1                  | 7.12E-02 | 1                  | 7.12E-02 |                    |          |                    |          | 1                  | 6.22E-01 | 1                  | 6.22E-01 |
| ABTB2     | 11  | 3                  | 6.43E-01 | 3                  | 6.43E-01 | 2                  | 6.40E-01 | 2                  | 6.40E-01 | 1                  | 6.22E-01 | 1                  | 6.22E-01 |
| DLX2      | 2   | 1                  | 7.12E-02 | 1                  | 7.12E-02 |                    |          |                    |          | 1                  | 6.22E-01 | 1                  | 6.22E-01 |
| TOMM22    | 22  | 1                  | 7.12E-02 | 1                  | 7.12E-02 |                    |          |                    |          | 1                  | 6.22E-01 | 1                  | 6.22E-01 |
| ARHGAP44  | 17  | 1                  | 7.12E-02 | 1                  | 7.12E-02 |                    |          |                    |          | 1                  | 6.22E-01 | 1                  | 6.22E-01 |
| IMPACT    | 18  | 3                  | 1.00E+00 | 3                  | 1.00E+00 | 3                  | 7.79E-01 | 3                  | 7.79E-01 | 1                  | 6.22E-01 | 1                  | 6.22E-01 |
| TSEN34    | 19  | 1                  | 7.12E-02 | 1                  | 7.12E-02 |                    |          |                    |          | 1                  | 6.22E-01 | 1                  | 6.22E-01 |
| COX19     | 7   | 1                  | 7.12E-02 | 1                  | 7.12E-02 |                    |          |                    |          | 1                  | 6.22E-01 | 1                  | 6.22E-01 |
| TBC1D22A  | 22  | 3                  | 7.18E-01 | 3                  | 7.18E-01 | 2                  | 6.28E-01 | 2                  | 6.28E-01 | 1                  | 6.22E-01 | 1                  | 6.22E-01 |
| PRKAG3    | 2   | 2                  | 8.24E-01 | 2                  | 8.24E-01 | 2                  | 6.47E-01 | 2                  | 6.47E-01 | 1                  | 6.22E-01 | 1                  | 6.22E-01 |
| RCHY1     | 4   | 1                  | 8.30E-02 | 1                  | 8.30E-02 |                    |          |                    |          | 1                  | 6.22E-01 | 1                  | 6.22E-01 |
| ELL3      | 15  | 1                  | 8.30E-02 | 1                  | 8.30E-02 |                    |          |                    |          | 1                  | 6.22E-01 | 1                  | 6.22E-01 |
| NEUROG1   | 5   | 1                  | 8.30E-02 | 1                  | 8.30E-02 |                    |          |                    |          | 1                  | 6.22E-01 | 1                  | 6.22E-01 |
| IFI35     | 17  | 2                  | 5.70E-01 | 2                  | 5.70E-01 | 2                  | 6.22E-01 | 2                  | 6.22E-01 |                    |          |                    |          |
| EXOC2     | 6   | 2                  | 5.78E-01 | 2                  | 5.78E-01 | 2                  | 6.22E-01 | 2                  | 6.22E-01 |                    |          |                    |          |
| RAD51AP2  | 2   | 3                  | 6.35E-01 | 3                  | 6.35E-01 | 2                  | 6.22E-01 | 2                  | 6.22E-01 | 1                  | 6.77E-01 | 1                  | 6.77E-01 |
| MAP6      | 11  | 2                  | 5.75E-01 | 2                  | 5.75E-01 | 2                  | 6.22E-01 | 2                  | 6.22E-01 |                    |          |                    |          |
| IQCC      | 1   | 4                  | 7.82E-01 | 4                  | 7.82E-01 | 4                  | 6.22E-01 | 4                  | 6.22E-01 | 1                  | 6.33E-01 | 1                  | 6.33E-01 |
| SERPINB10 | 18  | 4                  | 6.21E-01 | 5                  | 6.22E-01 | 3                  | 8.05E-01 | 4                  | 8.15E-01 | 1                  | 6.23E-01 | 2                  | 6.48E-01 |
| ZBED3     | 5   | 1                  | 7.83E-02 | 1                  | 7.83E-02 |                    |          |                    |          | 1                  | 6.23E-01 | 1                  | 6.23E-01 |
| MPZL2     | 11  | 2                  | 1.73E-02 | 2                  | 1.73E-02 |                    |          |                    |          | 2                  | 6.23E-01 | 2                  | 6.23E-01 |
| GSTM2     | 1   | 2                  | 5.81E-01 | 2                  | 5.81E-01 | 2                  | 6.23E-01 | 2                  | 6.23E-01 |                    |          |                    |          |
| CLN5      | 13  | 1                  | 7.53E-02 | 1                  | 7.53E-02 |                    |          |                    |          | 1                  | 6.23E-01 | 1                  | 6.23E-01 |
| ZNF521    | 18  | 4                  | 6.19E-01 | 4                  | 6.19E-01 | 3                  | 8.27E-01 | 3                  | 8.27E-01 | 1                  | 6.23E-01 | 1                  | 6.23E-01 |
| HUNK      | 21  | 3                  | 6.71E-01 | 4                  | 6.73E-01 | 2                  | 6.31E-01 | 3                  | 6.57E-01 | 1                  | 6.23E-01 | 2                  | 6.46E-01 |
| NCKAP1    | 2   | 1                  | 7.53E-02 | 1                  | 7.53E-02 |                    |          |                    |          | 1                  | 6.23E-01 | 1                  | 6.23E-01 |
| OR10R2    | 1   | 2                  | 9.21E-01 | 2                  | 9.21E-01 | 2                  | 6.23E-01 | 2                  | 6.23E-01 | 1                  | 6.74E-01 | 1                  | 6.74E-01 |
| IDNK      | 9   | 2                  | 5.46E-01 | 2                  | 5.46E-01 | 2                  | 6.23E-01 | 2                  | 6.23E-01 |                    |          |                    |          |
| BCAT1     | 12  | 2                  | 5.82E-01 | 2                  | 5.82E-01 | 2                  | 6.23E-01 | 2                  | 6.23E-01 |                    |          |                    |          |
| TMX1      | 14  | 2                  | 5.68E-01 | 2                  | 5.68E-01 | 2                  | 6.23E-01 | 2                  | 6.23E-01 |                    |          |                    |          |
| ZSCAN21   | 7   | 2                  | 5.86E-01 | 2                  | 5.86E-01 | 2                  | 6.23E-01 | 2                  | 6.23E-01 |                    |          |                    |          |

| SetID    | Chr | ADEH- vs NA        |          |                    |          | ADEH+ vs ADEH-     |          |                    |          | ADEH+ vs NA        |          |                    |          |
|----------|-----|--------------------|----------|--------------------|----------|--------------------|----------|--------------------|----------|--------------------|----------|--------------------|----------|
|          |     | rarenovel          |          | all                |          | rarenovel          |          | all                |          | rarenovel          |          | all                |          |
|          |     | N variants in test | p-value  | N variants in test | p-value  | N variants in test | p-value  | N variants in test | p-value  | N variants in test | p-value  | N variants in test | p-value  |
| REEP3    | 10  | 2                  | 5.66E-01 | 2                  | 5.66E-01 | 2                  | 6.23E-01 | 2                  | 6.23E-01 |                    |          |                    |          |
| PARL     | 3   | 2                  | 5.77E-01 | 2                  | 5.77E-01 | 2                  | 6.23E-01 | 2                  | 6.23E-01 |                    |          |                    |          |
| SREBF2   | 22  | 4                  | 4.05E-01 | 4                  | 4.05E-01 | 2                  | 6.23E-01 | 2                  | 6.23E-01 | 2                  | 6.37E-01 | 2                  | 6.37E-01 |
| GBP2     | 1   | 2                  | 1.41E-02 | 2                  | 1.41E-02 |                    |          |                    |          | 2                  | 6.23E-01 | 2                  | 6.23E-01 |
| WAC      | 10  | 2                  | 5.65E-01 | 2                  | 5.65E-01 | 2                  | 6.23E-01 | 2                  | 6.23E-01 |                    |          |                    |          |
| CLP1     | 11  | 2                  | 5.75E-01 | 2                  | 5.75E-01 | 2                  | 6.23E-01 | 2                  | 6.23E-01 |                    |          |                    |          |
| PTX3     | 3   | 2                  | 5.63E-01 | 2                  | 5.63E-01 | 2                  | 6.23E-01 | 2                  | 6.23E-01 |                    |          |                    |          |
| IL17C    | 16  | 2                  | 5.65E-01 | 2                  | 5.65E-01 | 2                  | 6.23E-01 | 2                  | 6.23E-01 |                    |          |                    |          |
| PUM2     | 2   | 1                  | 8.14E-02 | 1                  | 8.14E-02 |                    |          |                    |          | 1                  | 6.23E-01 | 1                  | 6.23E-01 |
| ETAA1    | 2   | 1                  | 8.14E-02 | 1                  | 8.14E-02 |                    |          |                    |          | 1                  | 6.23E-01 | 1                  | 6.23E-01 |
| MTTP     | 4   | 1                  | 8.14E-02 | 1                  | 8.14E-02 |                    |          |                    |          | 1                  | 6.23E-01 | 1                  | 6.23E-01 |
| OR10A4   | 11  | 1                  | 8.14E-02 | 2                  | 2.42E-01 |                    |          | 1                  | 1.00E+00 | 1                  | 6.23E-01 | 2                  | 7.94E-01 |
| MFN1     | 3   | 3                  | 3.19E-01 | 3                  | 3.19E-01 | 3                  | 6.23E-01 | 3                  | 6.23E-01 |                    |          |                    |          |
| FAM96A   | 15  | 2                  | 5.74E-01 | 2                  | 5.74E-01 | 2                  | 6.23E-01 | 2                  | 6.23E-01 |                    |          |                    |          |
| ARMS2    | 10  |                    |          | 2                  | 4.13E-01 |                    |          | 2                  | 7.56E-01 |                    |          | 2                  | 6.23E-01 |
| ZBTB40   | 1   | 2                  | 1.62E-02 | 2                  | 1.62E-02 |                    |          |                    |          | 2                  | 6.23E-01 | 2                  | 6.23E-01 |
| PEBP1    | 12  | 3                  | 7.31E-01 | 3                  | 7.31E-01 | 2                  | 6.23E-01 | 2                  | 6.23E-01 | 1                  | 6.48E-01 | 1                  | 6.48E-01 |
| TRIP6    | 7   | 2                  | 5.58E-01 | 2                  | 5.58E-01 | 2                  | 6.23E-01 | 2                  | 6.23E-01 |                    |          |                    |          |
| MFAP3L   | 4   | 2                  | 5.69E-01 | 2                  | 5.69E-01 | 2                  | 6.24E-01 | 2                  | 6.24E-01 |                    |          |                    |          |
| PPIL3    | 2   | 2                  | 5.67E-01 | 2                  | 5.67E-01 | 2                  | 6.24E-01 | 2                  | 6.24E-01 |                    |          |                    |          |
| LHCGR    | 2   | 2                  | 5.64E-01 | 2                  | 5.64E-01 | 2                  | 6.24E-01 | 2                  | 6.24E-01 |                    |          |                    |          |
| MDH1B    | 2   | 3                  | 6.27E-01 | 3                  | 6.27E-01 | 2                  | 6.24E-01 | 2                  | 6.24E-01 | 1                  | 6.60E-01 | 1                  | 6.60E-01 |
| FAM73B   | 9   | 3                  | 3.11E-01 | 3                  | 3.11E-01 | 3                  | 6.24E-01 | 3                  | 6.24E-01 |                    |          |                    |          |
| PKD2     | 4   | 2                  | 9.21E-01 | 2                  | 9.21E-01 | 2                  | 6.24E-01 | 2                  | 6.24E-01 | 1                  | 6.96E-01 | 1                  | 6.96E-01 |
| LIG3     | 17  | 6                  | 7.25E-01 | 6                  | 7.25E-01 | 4                  | 6.24E-01 | 4                  | 6.24E-01 | 2                  | 6.39E-01 | 2                  | 6.39E-01 |
| HPS4     | 22  | 2                  | 5.22E-01 | 2                  | 5.22E-01 | 2                  | 6.24E-01 | 2                  | 6.24E-01 |                    |          |                    |          |
| CENPO    | 2   | 2                  | 5.64E-01 | 2                  | 5.64E-01 | 2                  | 6.24E-01 | 2                  | 6.24E-01 |                    |          |                    |          |
| MTRF1L   | 6   | 2                  | 5.67E-01 | 2                  | 5.67E-01 | 2                  | 6.24E-01 | 2                  | 6.24E-01 |                    |          |                    |          |
| DEFB135  | 8   | 2                  | 5.78E-01 | 2                  | 5.78E-01 | 2                  | 6.24E-01 | 2                  | 6.24E-01 |                    |          |                    |          |
| NECAP2   | 1   | 2                  | 7.87E-01 | 2                  | 7.87E-01 | 2                  | 6.24E-01 | 2                  | 6.24E-01 | 1                  | 6.28E-01 | 1                  | 6.28E-01 |
| FBLN1    | 22  | 1                  | 9.24E-02 | 1                  | 9.24E-02 |                    |          |                    |          | 1                  | 6.24E-01 | 1                  | 6.24E-01 |
| ACTR3    | 2   | 1                  | 9.24E-02 | 1                  | 9.24E-02 |                    |          |                    |          | 1                  | 6.24E-01 | 1                  | 6.24E-01 |
| AP3M1    | 10  | 1                  | 9.24E-02 | 1                  | 9.24E-02 |                    |          |                    |          | 1                  | 6.24E-01 | 1                  | 6.24E-01 |
| LCLAT1   | 2   | 1                  | 9.24E-02 | 1                  | 9.24E-02 |                    |          |                    |          | 1                  | 6.24E-01 | 1                  | 6.24E-01 |
| FAM83B   | 6   | 4                  | 8.61E-01 | 4                  | 8.61E-01 | 3                  | 7.35E-01 | 3                  | 7.35E-01 | 2                  | 6.24E-01 | 2                  | 6.24E-01 |
| MORC3    | 21  | 2                  | 9.22E-01 | 2                  | 9.22E-01 | 2                  | 6.24E-01 | 2                  | 6.24E-01 | 1                  | 6.45E-01 | 1                  | 6.45E-01 |
| KHK      | 2   | 2                  | 5.87E-01 | 2                  | 5.87E-01 | 2                  | 6.24E-01 | 2                  | 6.24E-01 |                    |          |                    |          |
| DAAM1    | 14  | 2                  | 5.68E-01 | 2                  | 5.68E-01 | 2                  | 6.24E-01 | 2                  | 6.24E-01 |                    |          |                    |          |
| DYRK1B   | 19  | 2                  | 5.81E-01 | 2                  | 5.81E-01 | 2                  | 6.24E-01 | 2                  | 6.24E-01 |                    |          |                    |          |
| SPX      | 12  | 3                  | 3.20E-01 | 3                  | 3.20E-01 | 3                  | 6.24E-01 | 3                  | 6.24E-01 |                    |          |                    |          |
| NALCN    | 13  | 2                  | 5.66E-01 | 2                  | 5.66E-01 | 2                  | 6.24E-01 | 2                  | 6.24E-01 |                    |          |                    |          |
| SIRPD    | 20  | 2                  | 5.67E-01 | 2                  | 5.67E-01 | 2                  | 6.24E-01 | 2                  | 6.24E-01 |                    |          |                    |          |
| CHST13   | 3   | 2                  | 5.70E-01 | 2                  | 5.70E-01 | 2                  | 6.24E-01 | 2                  | 6.24E-01 |                    |          |                    |          |
| CEP78    | 9   | 3                  | 6.95E-01 | 3                  | 6.95E-01 | 2                  | 6.24E-01 | 2                  | 6.24E-01 | 1                  | 6.30E-01 | 1                  | 6.30E-01 |
| SCAF1    | 19  | 2                  | 5.83E-01 | 2                  | 5.83E-01 | 2                  | 6.24E-01 | 2                  | 6.24E-01 |                    |          |                    |          |
| FAM120A  | 9   | 2                  | 5.65E-01 | 2                  | 5.65E-01 | 2                  | 6.24E-01 | 2                  | 6.24E-01 |                    |          |                    |          |
| PPIL6    | 6   | 3                  | 6.33E-01 | 3                  | 6.33E-01 | 2                  | 6.24E-01 | 2                  | 6.24E-01 | 1                  | 7.02E-01 | 1                  | 7.02E-01 |
| CACNA2D2 | 3   | 2                  | 5.76E-01 | 2                  | 5.76E-01 | 2                  | 6.24E-01 | 2                  | 6.24E-01 |                    |          |                    |          |

| SetID    | Chr | ADEH- vs NA        |          |                    |          | ADEH+ vs ADEH-     |          |                    |          | ADEH+ vs NA        |          |                    |          |
|----------|-----|--------------------|----------|--------------------|----------|--------------------|----------|--------------------|----------|--------------------|----------|--------------------|----------|
|          |     | rarenovel          |          | all                |          | rarenovel          |          | all                |          | rarenovel          |          | all                |          |
|          |     | N variants in test | p-value  | N variants in test | p-value  | N variants in test | p-value  | N variants in test | p-value  | N variants in test | p-value  | N variants in test | p-value  |
| INTS10   | 8   | 4                  | 8.42E-01 | 4                  | 8.42E-01 | 3                  | 6.25E-01 | 3                  | 6.25E-01 | 1                  | 6.75E-01 | 1                  | 6.75E-01 |
| EFNA1    | 1   | 2                  | 2.07E-02 | 2                  | 2.07E-02 |                    |          |                    |          | 2                  | 6.25E-01 | 2                  | 6.25E-01 |
| BICD2    | 9   | 2                  | 5.69E-01 | 2                  | 5.69E-01 | 2                  | 6.25E-01 | 2                  | 6.25E-01 |                    |          |                    |          |
| GUF1     | 4   | 2                  | 5.58E-01 | 2                  | 5.58E-01 | 2                  | 6.25E-01 | 2                  | 6.25E-01 |                    |          |                    |          |
| HS1BP3   | 2   | 1                  | 7.19E-02 | 1                  | 7.19E-02 |                    |          |                    |          | 1                  | 6.25E-01 | 1                  | 6.25E-01 |
| RAI14    | 5   | 3                  | 6.65E-01 | 3                  | 6.65E-01 | 2                  | 6.32E-01 | 2                  | 6.32E-01 | 1                  | 6.25E-01 | 1                  | 6.25E-01 |
| ZNF132   | 19  | 3                  | 9.10E-01 | 3                  | 9.10E-01 | 3                  | 6.45E-01 | 3                  | 6.45E-01 | 1                  | 6.25E-01 | 1                  | 6.25E-01 |
| CTNNAL1  | 9   | 1                  | 7.19E-02 | 1                  | 7.19E-02 |                    |          |                    |          | 1                  | 6.25E-01 | 1                  | 6.25E-01 |
| THTPA    | 14  | 1                  | 7.19E-02 | 1                  | 7.19E-02 |                    |          |                    |          | 1                  | 6.25E-01 | 1                  | 6.25E-01 |
| TFB1M    | 6   | 1                  | 7.19E-02 | 1                  | 7.19E-02 |                    |          |                    |          | 1                  | 6.25E-01 | 1                  | 6.25E-01 |
| PXDC1    | 6   | 1                  | 7.19E-02 | 1                  | 7.19E-02 |                    |          |                    |          | 1                  | 6.25E-01 | 1                  | 6.25E-01 |
| PDHB     | 3   | 1                  | 7.19E-02 | 1                  | 7.19E-02 |                    |          |                    |          | 1                  | 6.25E-01 | 1                  | 6.25E-01 |
| TAAR1    | 6   | 1                  | 7.19E-02 | 1                  | 7.19E-02 |                    |          |                    |          | 1                  | 6.25E-01 | 1                  | 6.25E-01 |
| MFSD11   | 17  | 3                  | 7.33E-01 | 3                  | 7.33E-01 | 2                  | 6.25E-01 | 2                  | 6.25E-01 | 1                  | 6.98E-01 | 1                  | 6.98E-01 |
| PVRL2    | 19  | 3                  | 2.03E-01 | 3                  | 2.03E-01 | 3                  | 6.25E-01 | 3                  | 6.25E-01 |                    |          |                    |          |
| TRRAP    | 7   | 3                  | 2.25E-01 | 3                  | 2.25E-01 | 3                  | 6.25E-01 | 3                  | 6.25E-01 |                    |          |                    |          |
| PABPC1L  | 20  | 2                  | 5.64E-01 | 2                  | 5.64E-01 | 2                  | 6.25E-01 | 2                  | 6.25E-01 |                    |          |                    |          |
| DOCK3    | 3   | 5                  | 8.16E-01 | 5                  | 8.16E-01 | 4                  | 8.43E-01 | 4                  | 8.43E-01 | 1                  | 6.25E-01 | 1                  | 6.25E-01 |
| SNRK     | 3   | 1                  | 7.17E-02 | 1                  | 7.17E-02 |                    |          |                    |          | 1                  | 6.25E-01 | 1                  | 6.25E-01 |
| C1QTNF2  | 5   | 4                  | 5.89E-01 | 4                  | 5.89E-01 | 3                  | 6.93E-01 | 3                  | 6.93E-01 | 1                  | 6.25E-01 | 1                  | 6.25E-01 |
| MYSM1    | 1   | 3                  | 1.00E+00 | 3                  | 1.00E+00 | 3                  | 7.21E-01 | 3                  | 7.21E-01 | 1                  | 6.25E-01 | 1                  | 6.25E-01 |
| MEPE     | 4   | 4                  | 2.23E-01 | 4                  | 2.23E-01 | 2                  | 6.25E-01 | 2                  | 6.25E-01 | 2                  | 6.35E-01 | 2                  | 6.35E-01 |
| SBNO2    | 19  | 2                  | 5.81E-01 | 2                  | 5.81E-01 | 2                  | 6.25E-01 | 2                  | 6.25E-01 |                    |          |                    |          |
| PPP1R2   | 3   | 2                  | 5.79E-01 | 2                  | 5.79E-01 | 2                  | 6.25E-01 | 2                  | 6.25E-01 |                    |          |                    |          |
| GPR161   | 1   | 3                  | 6.51E-01 | 3                  | 6.51E-01 | 2                  | 6.25E-01 | 2                  | 6.25E-01 | 1                  | 6.59E-01 | 1                  | 6.59E-01 |
| HYAL2    | 3   | 2                  | 5.85E-01 | 2                  | 5.85E-01 | 2                  | 6.25E-01 | 2                  | 6.25E-01 |                    |          |                    |          |
| TRMT6    | 20  | 2                  | 5.73E-01 | 2                  | 5.73E-01 | 2                  | 6.25E-01 | 2                  | 6.25E-01 |                    |          |                    |          |
| ADRB3    | 8   | 3                  | 3.27E-01 | 3                  | 3.27E-01 | 3                  | 6.25E-01 | 3                  | 6.25E-01 |                    |          |                    |          |
| KATNA1   | 6   | 3                  | 8.12E-01 | 3                  | 8.12E-01 | 2                  | 6.25E-01 | 2                  | 6.25E-01 | 1                  | 6.29E-01 | 1                  | 6.29E-01 |
| SND1     | 7   | 1                  | 7.22E-02 | 1                  | 7.22E-02 |                    |          |                    |          | 1                  | 6.25E-01 | 1                  | 6.25E-01 |
| RFWD2    | 1   | 1                  | 7.22E-02 | 1                  | 7.22E-02 |                    |          |                    |          | 1                  | 6.25E-01 | 1                  | 6.25E-01 |
| BLNK     | 10  | 2                  | 1.00E+00 | 2                  | 1.00E+00 | 2                  | 6.27E-01 | 2                  | 6.27E-01 | 1                  | 6.25E-01 | 1                  | 6.25E-01 |
| NME7     | 1   | 3                  | 6.43E-01 | 3                  | 6.43E-01 | 2                  | 6.32E-01 | 2                  | 6.32E-01 | 1                  | 6.25E-01 | 1                  | 6.25E-01 |
| TRNT1    | 3   | 4                  | 8.00E-01 | 4                  | 8.00E-01 | 3                  | 6.56E-01 | 3                  | 6.56E-01 | 1                  | 6.25E-01 | 1                  | 6.25E-01 |
| C6orf203 | 6   | 1                  | 7.22E-02 | 1                  | 7.22E-02 |                    |          |                    |          | 1                  | 6.25E-01 | 1                  | 6.25E-01 |
| C1orf64  | 1   | 1                  | 7.22E-02 | 1                  | 7.22E-02 |                    |          |                    |          | 1                  | 6.25E-01 | 1                  | 6.25E-01 |
| PTGS1    | 9   | 3                  | 7.06E-01 | 3                  | 7.06E-01 | 3                  | 8.16E-01 | 3                  | 8.16E-01 | 1                  | 6.25E-01 | 1                  | 6.25E-01 |
| RANBP6   | 9   | 1                  | 8.79E-02 | 1                  | 8.79E-02 |                    |          |                    |          | 1                  | 6.25E-01 | 1                  | 6.25E-01 |
| AXIN1    | 16  | 3                  | 7.36E-01 | 3                  | 7.36E-01 | 2                  | 6.33E-01 | 2                  | 6.33E-01 | 1                  | 6.25E-01 | 1                  | 6.25E-01 |
| OR10H1   | 19  | 1                  | 8.79E-02 | 2                  | 9.62E-02 |                    |          |                    |          | 1                  | 6.25E-01 | 1                  | 6.25E-01 |
| USP5     | 12  | 1                  | 8.79E-02 | 1                  | 8.79E-02 |                    |          |                    |          | 1                  | 6.25E-01 | 1                  | 6.25E-01 |
| STMN4    | 8   | 1                  | 8.79E-02 | 1                  | 8.79E-02 |                    |          |                    |          | 1                  | 6.25E-01 | 1                  | 6.25E-01 |
| SPIB     | 19  | 2                  | 5.83E-01 | 2                  | 5.83E-01 | 2                  | 6.25E-01 | 2                  | 6.25E-01 |                    |          |                    |          |
| MKNK2    | 19  | 2                  | 5.60E-01 | 2                  | 5.60E-01 | 2                  | 6.25E-01 | 2                  | 6.25E-01 |                    |          |                    |          |
| BAG6     | 6   | 2                  | 5.68E-01 | 2                  | 5.68E-01 | 2                  | 6.25E-01 | 2                  | 6.25E-01 |                    |          |                    |          |
| FLII     | 17  | 6                  | 5.21E-01 | 6                  | 5.21E-01 | 4                  | 7.54E-01 | 4                  | 7.54E-01 | 2                  | 6.26E-01 | 2                  | 6.26E-01 |
| SLC38A8  | 16  | 2                  | 5.71E-01 | 2                  | 5.71E-01 | 2                  | 6.26E-01 | 2                  | 6.26E-01 |                    |          |                    |          |
| MFAP3    | 5   | 2                  | 5.66E-01 | 2                  | 5.66E-01 | 2                  | 6.26E-01 | 2                  | 6.26E-01 |                    |          |                    |          |

| SetID     | Chr | ADEH- vs NA        |          |                    |          | ADEH+ vs ADEH-     |          |                    |          | ADEH+ vs NA        |          |                    |          |
|-----------|-----|--------------------|----------|--------------------|----------|--------------------|----------|--------------------|----------|--------------------|----------|--------------------|----------|
|           |     | rarenovel          |          | all                |          | rarenovel          |          | all                |          | rarenovel          |          | all                |          |
|           |     | N variants in test | p-value  | N variants in test | p-value  | N variants in test | p-value  | N variants in test | p-value  | N variants in test | p-value  | N variants in test | p-value  |
| RHO       | 3   | 4                  | 3.10E-01 | 4                  | 3.10E-01 | 2                  | 6.61E-01 | 2                  | 6.61E-01 | 2                  | 6.26E-01 | 2                  | 6.26E-01 |
| UFL1      | 6   | 2                  | 5.59E-01 | 2                  | 5.59E-01 | 2                  | 6.26E-01 | 2                  | 6.26E-01 |                    |          |                    |          |
| PHIP      | 6   | 2                  | 5.82E-01 | 2                  | 5.82E-01 | 2                  | 6.26E-01 | 2                  | 6.26E-01 |                    |          |                    |          |
| TTC13     | 1   | 2                  | 5.72E-01 | 2                  | 5.72E-01 | 2                  | 6.26E-01 | 2                  | 6.26E-01 |                    |          |                    |          |
| SF3A1     | 22  | 2                  | 5.55E-01 | 2                  | 5.55E-01 | 2                  | 6.26E-01 | 2                  | 6.26E-01 |                    |          |                    |          |
| MCCC1     | 3   | 3                  | 7.30E-01 | 3                  | 7.30E-01 | 2                  | 6.26E-01 | 2                  | 6.26E-01 | 1                  | 6.40E-01 | 1                  | 6.40E-01 |
| UNC13A    | 19  | 2                  | 5.74E-01 | 2                  | 5.74E-01 | 2                  | 6.26E-01 | 2                  | 6.26E-01 |                    |          |                    |          |
| ADA       | 20  | 2                  | 3.21E-01 | 2                  | 3.21E-01 | 2                  | 6.26E-01 | 2                  | 6.26E-01 |                    |          |                    |          |
| CDAN1     | 15  | 4                  | 3.86E-01 | 5                  | 3.79E-01 | 2                  | 6.26E-01 | 3                  | 6.79E-01 | 2                  | 6.42E-01 | 3                  | 6.51E-01 |
| CD163     | 12  | 3                  | 6.36E-01 | 3                  | 6.36E-01 | 2                  | 6.26E-01 | 2                  | 6.26E-01 | 1                  | 6.44E-01 | 1                  | 6.44E-01 |
| SQSTM1    | 5   | 3                  | 6.53E-01 | 3                  | 6.53E-01 | 2                  | 6.26E-01 | 2                  | 6.26E-01 | 1                  | 6.49E-01 | 1                  | 6.49E-01 |
| CFAP52    | 17  | 4                  | 8.34E-01 | 4                  | 8.34E-01 | 3                  | 6.26E-01 | 3                  | 6.26E-01 | 1                  | 6.59E-01 | 1                  | 6.59E-01 |
| WNT9B     | 17  | 3                  | 7.68E-01 | 3                  | 7.68E-01 | 3                  | 8.29E-01 | 3                  | 8.29E-01 | 1                  | 6.26E-01 | 1                  | 6.26E-01 |
| TRAK2     | 2   | 3                  | 9.35E-01 | 3                  | 9.35E-01 | 3                  | 6.30E-01 | 3                  | 6.30E-01 | 1                  | 6.26E-01 | 1                  | 6.26E-01 |
| FLYWCH2   | 16  | 1                  | 7.32E-02 | 1                  | 7.32E-02 |                    |          |                    |          | 1                  | 6.26E-01 | 1                  | 6.26E-01 |
| CARD9     | 9   | 1                  | 7.32E-02 | 1                  | 7.32E-02 |                    |          |                    |          | 1                  | 6.26E-01 | 1                  | 6.26E-01 |
| SNAPC1    | 14  | 2                  | 2.73E-01 | 2                  | 2.73E-01 | 1                  | 6.49E-01 | 1                  | 6.49E-01 | 1                  | 6.26E-01 | 1                  | 6.26E-01 |
| ARID3A    | 19  | 2                  | 5.69E-01 | 2                  | 5.69E-01 | 2                  | 6.26E-01 | 2                  | 6.26E-01 |                    |          |                    |          |
| PLBD2     | 12  | 4                  | 4.01E-01 | 4                  | 4.01E-01 | 2                  | 6.66E-01 | 2                  | 6.66E-01 | 2                  | 6.26E-01 | 2                  | 6.26E-01 |
| HEBP2     | 6   | 1                  | 7.92E-02 | 1                  | 7.92E-02 |                    |          |                    |          | 1                  | 6.26E-01 | 1                  | 6.26E-01 |
| MCOLN3    | 1   | 1                  | 7.92E-02 | 1                  | 7.92E-02 |                    |          |                    |          | 1                  | 6.26E-01 | 1                  | 6.26E-01 |
| PIFO      | 1   | 1                  | 7.92E-02 | 1                  | 7.92E-02 |                    |          |                    |          | 1                  | 6.26E-01 | 1                  | 6.26E-01 |
| SNX33     | 15  | 1                  | 7.92E-02 | 1                  | 7.92E-02 |                    |          |                    |          | 1                  | 6.26E-01 | 1                  | 6.26E-01 |
| C6orf15   | 6   | 1                  | 7.92E-02 | 1                  | 7.92E-02 |                    |          |                    |          | 1                  | 6.26E-01 | 1                  | 6.26E-01 |
| MS4A8     | 11  | 1                  | 7.92E-02 | 1                  | 7.92E-02 |                    |          |                    |          | 1                  | 6.26E-01 | 1                  | 6.26E-01 |
| MX1       | 21  | 2                  | 3.05E-01 | 2                  | 3.05E-01 | 2                  | 6.26E-01 | 2                  | 6.26E-01 |                    |          |                    |          |
| MIEF2     | 17  | 2                  | 1.31E-02 | 2                  | 1.31E-02 |                    |          |                    |          | 2                  | 6.26E-01 | 2                  | 6.26E-01 |
| KANK4     | 1   | 3                  | 7.05E-01 | 3                  | 7.05E-01 | 2                  | 6.26E-01 | 2                  | 6.26E-01 | 1                  | 6.50E-01 | 1                  | 6.50E-01 |
| POGZ      | 1   | 5                  | 8.03E-01 | 5                  | 8.03E-01 | 4                  | 6.26E-01 | 4                  | 6.26E-01 | 1                  | 6.82E-01 | 1                  | 6.82E-01 |
| CES2      | 16  | 2                  | 1.00E+00 | 2                  | 1.00E+00 | 2                  | 6.26E-01 | 2                  | 6.26E-01 | 2                  | 6.37E-01 | 2                  | 6.37E-01 |
| IKZF3     | 17  | 1                  | 7.81E-02 | 1                  | 7.81E-02 |                    |          |                    |          | 1                  | 6.27E-01 | 1                  | 6.27E-01 |
| APOM      | 6   | 1                  | 7.81E-02 | 1                  | 7.81E-02 |                    |          |                    |          | 1                  | 6.27E-01 | 1                  | 6.27E-01 |
| CTTNBP2NL | 1   | 1                  | 7.81E-02 | 1                  | 7.81E-02 |                    |          |                    |          | 1                  | 6.27E-01 | 1                  | 6.27E-01 |
| BARHL1    | 9   | 1                  | 7.81E-02 | 1                  | 7.81E-02 |                    |          |                    |          | 1                  | 6.27E-01 | 1                  | 6.27E-01 |
| BRPF1     | 3   | 3                  | 6.79E-01 | 3                  | 6.79E-01 | 2                  | 6.34E-01 | 2                  | 6.34E-01 | 1                  | 6.27E-01 | 1                  | 6.27E-01 |
| ZNF749    | 19  | 1                  | 7.81E-02 | 1                  | 7.81E-02 |                    |          |                    |          | 1                  | 6.27E-01 | 1                  | 6.27E-01 |
| KIAA1429  | 8   | 4                  | 8.05E-01 | 4                  | 8.05E-01 | 3                  | 7.97E-01 | 3                  | 7.97E-01 | 1                  | 6.27E-01 | 1                  | 6.27E-01 |
| PI4KB     | 1   | 4                  | 8.28E-01 | 4                  | 8.28E-01 | 3                  | 7.73E-01 | 3                  | 7.73E-01 | 1                  | 6.27E-01 | 1                  | 6.27E-01 |
| OPRM1     | 6   | 9                  | 1.00E+00 | 11                 | 1.00E+00 | 8                  | 8.16E-01 | 10                 | 6.27E-01 | 4                  | 1.00E+00 | 6                  | 7.83E-01 |
| MRPL39    | 21  | 2                  | 5.68E-01 | 2                  | 5.68E-01 | 2                  | 6.27E-01 | 2                  | 6.27E-01 |                    |          |                    |          |
| NDST1     | 5   | 2                  | 9.21E-01 | 2                  | 9.21E-01 | 2                  | 6.27E-01 | 2                  | 6.27E-01 | 1                  | 6.34E-01 | 1                  | 6.34E-01 |
| C17orf53  | 17  | 3                  | 6.14E-01 | 3                  | 6.14E-01 | 2                  | 6.27E-01 | 2                  | 6.27E-01 | 1                  | 6.65E-01 | 1                  | 6.65E-01 |
| EDEM1     | 3   | 3                  | 3.13E-01 | 3                  | 3.13E-01 | 3                  | 6.27E-01 | 3                  | 6.27E-01 |                    |          |                    |          |
| SCLY      | 2   | 2                  | 5.73E-01 | 2                  | 5.73E-01 | 2                  | 6.27E-01 | 2                  | 6.27E-01 |                    |          |                    |          |
| KLHL18    | 3   | 2                  | 5.80E-01 | 2                  | 5.80E-01 | 2                  | 6.27E-01 | 2                  | 6.27E-01 |                    |          |                    |          |
| CBX6      | 22  | 2                  | 5.64E-01 | 2                  | 5.64E-01 | 2                  | 6.27E-01 | 2                  | 6.27E-01 |                    |          |                    |          |
| SLC25A10  | 17  | 2                  | 2.04E-02 | 2                  | 2.04E-02 |                    |          |                    |          | 2                  | 6.27E-01 | 2                  | 6.27E-01 |
| CDC42EP2  | 11  | 2                  | 3.18E-01 | 2                  | 3.18E-01 | 2                  | 6.27E-01 | 2                  | 6.27E-01 |                    |          |                    |          |



| SetID    | Chr | ADEH- vs NA        |          |                    |          | ADEH+ vs ADEH-     |          |                    |          | ADEH+ vs NA        |          |                    |          |
|----------|-----|--------------------|----------|--------------------|----------|--------------------|----------|--------------------|----------|--------------------|----------|--------------------|----------|
|          |     | rare novel         |          | all                |          | rare novel         |          | all                |          | rare novel         |          | all                |          |
|          |     | N variants in test | p-value  | N variants in test | p-value  | N variants in test | p-value  | N variants in test | p-value  | N variants in test | p-value  | N variants in test | p-value  |
| NLRP10   | 11  | 3                  | 7.13E-01 | 3                  | 7.13E-01 | 2                  | 6.28E-01 | 2                  | 6.28E-01 | 2                  | 6.52E-01 | 2                  | 6.52E-01 |
| MYRF     | 11  | 2                  | 5.51E-01 | 2                  | 5.51E-01 | 2                  | 6.28E-01 | 2                  | 6.28E-01 |                    |          |                    |          |
| VASH1    | 14  | 2                  | 5.82E-01 | 2                  | 5.82E-01 | 2                  | 6.28E-01 | 2                  | 6.28E-01 |                    |          |                    |          |
| AIG1     | 6   | 2                  | 5.79E-01 | 2                  | 5.79E-01 | 2                  | 6.28E-01 | 2                  | 6.28E-01 |                    |          |                    |          |
| NKD2     | 5   | 3                  | 4.88E-02 | 3                  | 4.88E-02 | 3                  | 6.28E-01 | 3                  | 6.28E-01 | 1                  | 1.00E+00 | 1                  | 1.00E+00 |
| STIM2    | 4   | 2                  | 5.50E-01 | 2                  | 5.50E-01 | 2                  | 6.28E-01 | 2                  | 6.28E-01 |                    |          |                    |          |
| UNC5CL   | 6   | 3                  | 6.23E-01 | 3                  | 6.23E-01 | 2                  | 6.28E-01 | 2                  | 6.28E-01 | 2                  | 6.44E-01 | 2                  | 6.44E-01 |
| GPRC5B   | 16  | 3                  | 6.67E-01 | 3                  | 6.67E-01 | 2                  | 6.50E-01 | 2                  | 6.50E-01 | 1                  | 6.28E-01 | 1                  | 6.28E-01 |
| HBS1L    | 6   | 1                  | 7.61E-01 | 1                  | 7.61E-01 | 1                  | 6.49E-01 | 1                  | 6.49E-01 | 1                  | 6.28E-01 | 1                  | 6.28E-01 |
| CSTF2T   | 10  | 1                  | 7.90E-02 | 1                  | 7.90E-02 |                    |          |                    |          | 1                  | 6.28E-01 | 1                  | 6.28E-01 |
| OR52R1   | 11  | 3                  | 5.71E-01 | 4                  | 5.71E-01 | 2                  | 6.37E-01 | 3                  | 6.37E-01 | 1                  | 6.28E-01 | 2                  | 6.29E-01 |
| CNOT4    | 7   | 2                  | 1.00E+00 | 2                  | 1.00E+00 | 2                  | 7.33E-01 | 2                  | 7.33E-01 | 1                  | 6.28E-01 | 1                  | 6.28E-01 |
| DZANK1   | 20  | 1                  | 6.45E-02 | 1                  | 6.45E-02 |                    |          |                    |          | 1                  | 6.28E-01 | 1                  | 6.28E-01 |
| KCNF1    | 2   | 2                  | 5.71E-01 | 2                  | 5.71E-01 | 2                  | 6.28E-01 | 2                  | 6.28E-01 |                    |          |                    |          |
| PFKFB4   | 3   | 4                  | 7.97E-01 | 4                  | 7.97E-01 | 3                  | 7.94E-01 | 3                  | 7.94E-01 | 1                  | 6.28E-01 | 1                  | 6.28E-01 |
| PDCD6    | 5   | 1                  | 7.41E-02 | 1                  | 7.41E-02 |                    |          |                    |          | 1                  | 6.28E-01 | 1                  | 6.28E-01 |
| MNAT1    | 14  | 1                  | 7.41E-02 | 1                  | 7.41E-02 |                    |          |                    |          | 1                  | 6.28E-01 | 1                  | 6.28E-01 |
| UGDH     | 4   | 1                  | 7.41E-02 | 1                  | 7.41E-02 |                    |          |                    |          | 1                  | 6.28E-01 | 1                  | 6.28E-01 |
| LSM14B   | 20  | 1                  | 6.94E-02 | 1                  | 6.94E-02 |                    |          |                    |          | 1                  | 6.28E-01 | 1                  | 6.28E-01 |
| TAS2R13  | 12  | 1                  | 6.94E-02 | 1                  | 6.94E-02 |                    |          |                    |          | 1                  | 6.28E-01 | 1                  | 6.28E-01 |
| FXR1     | 3   | 1                  | 6.94E-02 | 1                  | 6.94E-02 |                    |          |                    |          | 1                  | 6.28E-01 | 1                  | 6.28E-01 |
| HINT2    | 9   | 1                  | 6.94E-02 | 1                  | 6.94E-02 |                    |          |                    |          | 1                  | 6.28E-01 | 1                  | 6.28E-01 |
| ANKRD34B | 5   | 2                  | 5.67E-01 | 2                  | 5.67E-01 | 2                  | 6.28E-01 | 2                  | 6.28E-01 |                    |          |                    |          |
| IDH3B    | 20  | 2                  | 5.65E-01 | 2                  | 5.65E-01 | 2                  | 6.28E-01 | 2                  | 6.28E-01 |                    |          |                    |          |
| SFXN1    | 5   | 1                  | 5.64E-01 | 1                  | 5.64E-01 | 1                  | 1.00E+00 | 1                  | 1.00E+00 | 1                  | 6.28E-01 | 1                  | 6.28E-01 |
| ZFYVE27  | 10  | 3                  | 9.07E-01 | 3                  | 9.07E-01 | 3                  | 7.41E-01 | 3                  | 7.41E-01 | 1                  | 6.28E-01 | 1                  | 6.28E-01 |
| SLC26A10 | 12  | 6                  | 5.95E-01 | 6                  | 5.95E-01 | 6                  | 6.28E-01 | 6                  | 6.28E-01 | 3                  | 1.00E+00 | 3                  | 1.00E+00 |
| MVP      | 16  | 2                  | 5.61E-01 | 2                  | 5.61E-01 | 2                  | 6.28E-01 | 2                  | 6.28E-01 |                    |          |                    |          |
| NFE2     | 12  | 2                  | 5.79E-01 | 2                  | 5.79E-01 | 2                  | 6.29E-01 | 2                  | 6.29E-01 |                    |          |                    |          |
| APOA4    | 11  | 1                  | 7.89E-02 | 1                  | 7.89E-02 |                    |          |                    |          | 1                  | 6.29E-01 | 1                  | 6.29E-01 |
| EDEM2    | 20  | 4                  | 8.30E-01 | 4                  | 8.30E-01 | 3                  | 6.43E-01 | 3                  | 6.43E-01 | 1                  | 6.29E-01 | 1                  | 6.29E-01 |
| SERINC5  | 5   | 2                  | 1.00E+00 | 2                  | 1.00E+00 | 2                  | 6.53E-01 | 2                  | 6.53E-01 | 1                  | 6.29E-01 | 1                  | 6.29E-01 |
| TRPV5    | 7   | 1                  | 7.89E-02 | 1                  | 7.89E-02 |                    |          |                    |          | 1                  | 6.29E-01 | 1                  | 6.29E-01 |
| VPREB1   | 22  | 1                  | 7.89E-02 | 1                  | 7.89E-02 |                    |          |                    |          | 1                  | 6.29E-01 | 1                  | 6.29E-01 |
| HSD17B12 | 11  | 1                  | 7.89E-02 | 1                  | 7.89E-02 |                    |          |                    |          | 1                  | 6.29E-01 | 1                  | 6.29E-01 |
| TMEM241  | 18  | 1                  | 7.89E-02 | 1                  | 7.89E-02 |                    |          |                    |          | 1                  | 6.29E-01 | 1                  | 6.29E-01 |
| DNAJB6   | 7   | 1                  | 7.89E-02 | 1                  | 7.89E-02 |                    |          |                    |          | 1                  | 6.29E-01 | 1                  | 6.29E-01 |
| KCND3    | 1   | 1                  | 8.03E-01 | 1                  | 8.03E-01 | 1                  | 1.00E+00 | 1                  | 1.00E+00 | 1                  | 6.29E-01 | 1                  | 6.29E-01 |
| CERCAM   | 9   | 7                  | 4.85E-01 | 7                  | 4.85E-01 | 4                  | 1.00E+00 | 4                  | 1.00E+00 | 5                  | 6.29E-01 | 5                  | 6.29E-01 |
| FGD5     | 3   | 4                  | 3.42E-01 | 4                  | 3.42E-01 | 2                  | 6.29E-01 | 2                  | 6.29E-01 | 2                  | 6.44E-01 | 2                  | 6.44E-01 |
| ZNF687   | 1   | 2                  | 5.87E-01 | 2                  | 5.87E-01 | 2                  | 6.29E-01 | 2                  | 6.29E-01 |                    |          |                    |          |
| CDS1     | 4   | 2                  | 3.11E-01 | 2                  | 3.11E-01 | 1                  | 6.33E-01 | 1                  | 6.33E-01 | 1                  | 6.29E-01 | 1                  | 6.29E-01 |
| FAM89A   | 1   | 1                  | 7.10E-02 | 1                  | 7.10E-02 |                    |          |                    |          | 1                  | 6.29E-01 | 1                  | 6.29E-01 |
| FOLR2    | 11  | 1                  | 7.10E-02 | 1                  | 7.10E-02 |                    |          |                    |          | 1                  | 6.29E-01 | 1                  | 6.29E-01 |
| MIPEP    | 13  | 5                  | 9.00E-01 | 5                  | 9.00E-01 | 4                  | 8.71E-01 | 4                  | 8.71E-01 | 2                  | 6.29E-01 | 2                  | 6.29E-01 |
| BRD2     | 6   | 4                  | 8.51E-01 | 4                  | 8.51E-01 | 3                  | 7.69E-01 | 3                  | 7.69E-01 | 1                  | 6.29E-01 | 1                  | 6.29E-01 |
| ELOVL2   | 6   | 1                  | 8.73E-02 | 1                  | 8.73E-02 |                    |          |                    |          | 1                  | 6.29E-01 | 1                  | 6.29E-01 |
| UBXN4    | 2   | 2                  | 1.00E+00 | 2                  | 1.00E+00 | 2                  | 6.30E-01 | 2                  | 6.30E-01 | 1                  | 6.29E-01 | 1                  | 6.29E-01 |



| SetID    | Chr | ADEH- vs NA        |          |                    |          | ADEH+ vs ADEH-     |          |                    |          | ADEH+ vs NA        |          |                    |          |
|----------|-----|--------------------|----------|--------------------|----------|--------------------|----------|--------------------|----------|--------------------|----------|--------------------|----------|
|          |     | rare novel         |          | all                |          | rare novel         |          | all                |          | rare novel         |          | all                |          |
|          |     | N variants in test | p-value  | N variants in test | p-value  | N variants in test | p-value  | N variants in test | p-value  | N variants in test | p-value  | N variants in test | p-value  |
| SLC29A4  | 7   | 1                  | 8.73E-02 | 1                  | 8.73E-02 |                    |          |                    |          |                    |          |                    |          |
| ZIK1     | 19  | 2                  | 4.02E-01 | 2                  | 4.02E-01 | 1                  | 6.33E-01 | 1                  | 6.33E-01 | 1                  | 6.29E-01 | 1                  | 6.29E-01 |
| UCHL5    | 1   | 3                  | 3.65E-01 | 3                  | 3.65E-01 | 3                  | 6.29E-01 | 3                  | 6.29E-01 |                    |          |                    |          |
| SYNPO    | 5   | 4                  | 3.38E-01 | 4                  | 3.38E-01 | 2                  | 6.29E-01 | 2                  | 6.29E-01 | 2                  | 6.32E-01 | 2                  | 6.32E-01 |
| TLL5     | 14  | 4                  | 9.03E-01 | 4                  | 9.03E-01 | 3                  | 7.95E-01 | 3                  | 7.95E-01 | 1                  | 6.29E-01 | 1                  | 6.29E-01 |
| ILK      | 11  | 1                  | 1.38E-01 | 1                  | 1.38E-01 |                    |          |                    |          | 1                  | 6.29E-01 | 1                  | 6.29E-01 |
| CYR1     | 21  | 2                  | 5.62E-01 | 2                  | 5.62E-01 | 2                  | 6.29E-01 | 2                  | 6.29E-01 |                    |          |                    |          |
| CENPC    | 4   | 3                  | 7.30E-01 | 3                  | 7.30E-01 | 2                  | 6.29E-01 | 2                  | 6.29E-01 | 2                  | 6.45E-01 | 2                  | 6.45E-01 |
| COLGALT2 | 1   | 2                  | 1.00E+00 | 2                  | 1.00E+00 | 2                  | 6.29E-01 | 2                  | 6.29E-01 | 1                  | 6.71E-01 | 1                  | 6.71E-01 |
| GDF6     | 8   | 2                  | 5.62E-01 | 2                  | 5.62E-01 | 2                  | 6.29E-01 | 2                  | 6.29E-01 |                    |          |                    |          |
| DCTN1    | 2   | 3                  | 7.00E-01 | 3                  | 7.00E-01 | 2                  | 6.29E-01 | 2                  | 6.29E-01 | 1                  | 6.71E-01 | 1                  | 6.71E-01 |
| PAG1     | 8   | 2                  | 5.62E-01 | 2                  | 5.62E-01 | 2                  | 6.29E-01 | 2                  | 6.29E-01 |                    |          |                    |          |
| CCDC102A | 16  | 4                  | 8.35E-01 | 4                  | 8.35E-01 | 3                  | 7.45E-01 | 3                  | 7.45E-01 | 2                  | 6.29E-01 | 2                  | 6.29E-01 |
| FRY      | 13  | 3                  | 3.34E-01 | 3                  | 3.34E-01 | 3                  | 6.29E-01 | 3                  | 6.29E-01 |                    |          |                    |          |
| ZNF554   | 19  | 2                  | 5.70E-01 | 2                  | 5.70E-01 | 2                  | 6.29E-01 | 2                  | 6.29E-01 |                    |          |                    |          |
| SRA1     | 5   | 4                  | 2.65E-01 | 4                  | 2.65E-01 | 2                  | 6.53E-01 | 2                  | 6.53E-01 | 2                  | 6.29E-01 | 2                  | 6.29E-01 |
| SLC43A2  | 17  | 4                  | 2.92E-01 | 4                  | 2.92E-01 | 2                  | 6.29E-01 | 2                  | 6.29E-01 | 2                  | 6.47E-01 | 2                  | 6.47E-01 |
| HIPK2    | 7   | 3                  | 7.99E-01 | 3                  | 7.99E-01 | 2                  | 6.29E-01 | 2                  | 6.29E-01 | 1                  | 6.41E-01 | 1                  | 6.41E-01 |
| PIP4K2C  | 12  | 2                  | 5.67E-01 | 2                  | 5.67E-01 | 2                  | 6.29E-01 | 2                  | 6.29E-01 |                    |          |                    |          |
| TXNDC5   | 6   | 4                  | 1.00E+00 | 4                  | 1.00E+00 | 3                  | 8.38E-01 | 3                  | 8.38E-01 | 2                  | 6.29E-01 | 2                  | 6.29E-01 |
| NUMBL    | 19  | 2                  | 5.64E-01 | 2                  | 5.64E-01 | 2                  | 6.29E-01 | 2                  | 6.29E-01 |                    |          |                    |          |
| FSD2     | 15  | 2                  | 5.67E-01 | 2                  | 5.67E-01 | 2                  | 6.29E-01 | 2                  | 6.29E-01 |                    |          |                    |          |
| C9orf173 | 9   | 1                  | 8.40E-02 | 1                  | 8.40E-02 |                    |          |                    |          | 1                  | 6.29E-01 | 1                  | 6.29E-01 |
| ODF2     | 9   | 3                  | 4.57E-01 | 3                  | 4.57E-01 | 2                  | 7.85E-01 | 2                  | 7.85E-01 | 1                  | 6.29E-01 | 1                  | 6.29E-01 |
| POLR3B   | 12  | 1                  | 8.40E-02 | 1                  | 8.40E-02 |                    |          |                    |          | 1                  | 6.29E-01 | 1                  | 6.29E-01 |
| IL22RA1  | 1   | 1                  | 8.40E-02 | 1                  | 8.40E-02 |                    |          |                    |          | 1                  | 6.29E-01 | 1                  | 6.29E-01 |
| AP1M1    | 19  | 1                  | 8.40E-02 | 1                  | 8.40E-02 |                    |          |                    |          | 1                  | 6.29E-01 | 1                  | 6.29E-01 |
| INO80B   | 2   | 1                  | 8.40E-02 | 1                  | 8.40E-02 |                    |          |                    |          | 1                  | 6.29E-01 | 1                  | 6.29E-01 |
| UQCRH    | 1   | 2                  | 5.68E-01 | 2                  | 5.68E-01 | 2                  | 6.29E-01 | 2                  | 6.29E-01 |                    |          |                    |          |
| CANT1    | 17  | 2                  | 6.17E-01 | 2                  | 6.17E-01 | 1                  | 1.00E+00 | 1                  | 1.00E+00 | 2                  | 6.29E-01 | 2                  | 6.29E-01 |
| IKBKB    | 8   | 2                  | 5.84E-01 | 2                  | 5.84E-01 | 2                  | 6.29E-01 | 2                  | 6.29E-01 |                    |          |                    |          |
| OR2K2    | 9   | 2                  | 5.75E-01 | 2                  | 5.75E-01 | 2                  | 6.30E-01 | 2                  | 6.30E-01 |                    |          |                    |          |
| RTL1     | 14  | 3                  | 3.56E-01 | 3                  | 3.56E-01 | 3                  | 6.30E-01 | 3                  | 6.30E-01 | 1                  | 1.00E+00 | 1                  | 1.00E+00 |
| GSTM4    | 1   | 1                  | 8.13E-02 | 1                  | 8.13E-02 |                    |          |                    |          | 1                  | 6.30E-01 | 1                  | 6.30E-01 |
| PTPRE    | 10  | 1                  | 8.13E-02 | 1                  | 8.13E-02 |                    |          |                    |          | 1                  | 6.30E-01 | 1                  | 6.30E-01 |
| WFIKK1   | 16  | 5                  | 7.20E-01 | 5                  | 7.20E-01 | 4                  | 8.67E-01 | 4                  | 8.67E-01 | 1                  | 6.30E-01 | 1                  | 6.30E-01 |
| KCTD14   | 11  | 1                  | 8.13E-02 | 1                  | 8.13E-02 |                    |          |                    |          | 1                  | 6.30E-01 | 1                  | 6.30E-01 |
| ZNF71    | 19  | 1                  | 8.13E-02 | 1                  | 8.13E-02 |                    |          |                    |          | 1                  | 6.30E-01 | 1                  | 6.30E-01 |
| UQCR10   | 22  | 1                  | 8.13E-02 | 1                  | 8.13E-02 |                    |          |                    |          | 1                  | 6.30E-01 | 1                  | 6.30E-01 |
| SNCB     | 5   | 1                  | 8.13E-02 | 1                  | 8.13E-02 |                    |          |                    |          | 1                  | 6.30E-01 | 1                  | 6.30E-01 |
| COQ5     | 12  | 3                  | 7.07E-01 | 3                  | 7.07E-01 | 2                  | 6.58E-01 | 2                  | 6.58E-01 | 1                  | 6.30E-01 | 1                  | 6.30E-01 |
| CDC7     | 1   | 3                  | 8.75E-01 | 3                  | 8.75E-01 | 2                  | 7.07E-01 | 2                  | 7.07E-01 | 2                  | 6.30E-01 | 2                  | 6.30E-01 |
| PPP2R3C  | 14  | 2                  | 5.69E-01 | 2                  | 5.69E-01 | 2                  | 6.30E-01 | 2                  | 6.30E-01 |                    |          |                    |          |
| ZNF425   | 7   | 1                  | 7.10E-02 | 1                  | 7.10E-02 |                    |          |                    |          | 1                  | 6.30E-01 | 1                  | 6.30E-01 |
| RNASE6   | 14  | 1                  | 7.10E-02 | 1                  | 7.10E-02 |                    |          |                    |          | 1                  | 6.30E-01 | 1                  | 6.30E-01 |
| RGS3     | 9   | 4                  | 7.13E-01 | 4                  | 7.13E-01 | 3                  | 7.75E-01 | 3                  | 7.75E-01 | 1                  | 6.30E-01 | 1                  | 6.30E-01 |
| SSX2IP   | 1   | 1                  | 7.10E-02 | 1                  | 7.10E-02 |                    |          |                    |          | 1                  | 6.30E-01 | 1                  | 6.30E-01 |
| HLX      | 1   | 1                  | 7.10E-02 | 1                  | 7.10E-02 |                    |          |                    |          | 1                  | 6.30E-01 | 1                  | 6.30E-01 |

| SetID     | Chr | ADEH- vs NA        |          |                    |          | ADEH+ vs ADEH-     |          |                    |          | ADEH+ vs NA        |          |                    |          |
|-----------|-----|--------------------|----------|--------------------|----------|--------------------|----------|--------------------|----------|--------------------|----------|--------------------|----------|
|           |     | rarenovel          |          | all                |          | rarenovel          |          | all                |          | rarenovel          |          | all                |          |
|           |     | N variants in test | p-value  | N variants in test | p-value  | N variants in test | p-value  | N variants in test | p-value  | N variants in test | p-value  | N variants in test | p-value  |
| LCE2A     | 1   | 1                  | 7.33E-01 | 1                  | 7.33E-01 | 1                  | 1.00E+00 | 1                  | 1.00E+00 | 1                  | 6.30E-01 | 1                  | 6.30E-01 |
| CARTPT    | 5   | 2                  | 5.70E-01 | 2                  | 5.70E-01 | 2                  | 6.30E-01 | 2                  | 6.30E-01 |                    |          |                    |          |
| ADGRA1    | 10  | 2                  | 5.67E-01 | 2                  | 5.67E-01 | 2                  | 6.30E-01 | 2                  | 6.30E-01 |                    |          |                    |          |
| YLP M1    | 14  | 5                  | 6.52E-01 | 5                  | 6.52E-01 | 3                  | 6.95E-01 | 3                  | 6.95E-01 | 2                  | 6.30E-01 | 2                  | 6.30E-01 |
| SMARCA L1 | 2   | 2                  | 5.58E-01 | 2                  | 5.58E-01 | 2                  | 6.30E-01 | 2                  | 6.30E-01 |                    |          |                    |          |
| GHSR      | 3   | 2                  | 1.80E-02 | 2                  | 1.80E-02 |                    |          |                    |          | 2                  | 6.30E-01 | 2                  | 6.30E-01 |
| ADAR      | 1   | 2                  | 5.61E-01 | 2                  | 5.61E-01 | 2                  | 6.30E-01 | 2                  | 6.30E-01 |                    |          |                    |          |
| OR3A3     | 17  | 1                  | 5.88E-02 | 1                  | 5.88E-02 |                    |          |                    |          | 1                  | 6.30E-01 | 1                  | 6.30E-01 |
| IRS2      | 13  | 4                  | 8.30E-01 | 4                  | 8.30E-01 | 3                  | 6.30E-01 | 3                  | 6.30E-01 | 1                  | 6.92E-01 | 1                  | 6.92E-01 |
| MAP3K13   | 3   | 3                  | 3.33E-01 | 3                  | 3.33E-01 | 3                  | 6.30E-01 | 3                  | 6.30E-01 |                    |          |                    |          |
| MED26     | 19  | 1                  | 7.01E-02 | 1                  | 7.01E-02 |                    |          |                    |          | 1                  | 6.30E-01 | 1                  | 6.30E-01 |
| APOA1     | 11  | 1                  | 7.01E-02 | 1                  | 7.01E-02 |                    |          |                    |          | 1                  | 6.30E-01 | 1                  | 6.30E-01 |
| MED18     | 1   | 3                  | 6.55E-01 | 3                  | 6.55E-01 | 2                  | 6.30E-01 | 2                  | 6.30E-01 | 1                  | 6.45E-01 | 1                  | 6.45E-01 |
| CIDEB     | 14  | 3                  | 5.80E-01 | 3                  | 5.80E-01 | 2                  | 6.30E-01 | 2                  | 6.30E-01 | 1                  | 6.30E-01 | 1                  | 6.30E-01 |
| KIAA1549  | 7   | 4                  | 8.46E-01 | 4                  | 8.46E-01 | 3                  | 7.72E-01 | 3                  | 7.72E-01 | 2                  | 6.30E-01 | 2                  | 6.30E-01 |
| FHL2      | 2   | 4                  | 9.09E-01 | 4                  | 9.09E-01 | 3                  | 8.40E-01 | 3                  | 8.40E-01 | 2                  | 6.30E-01 | 2                  | 6.30E-01 |
| PHYHIPL   | 10  | 2                  | 1.53E-02 | 2                  | 1.53E-02 |                    |          |                    |          | 2                  | 6.30E-01 | 2                  | 6.30E-01 |
| NFIC      | 19  | 2                  | 1.00E+00 | 2                  | 1.00E+00 | 2                  | 6.30E-01 | 2                  | 6.30E-01 | 1                  | 6.34E-01 | 1                  | 6.34E-01 |
| PLCB1     | 20  | 4                  | 2.49E-01 | 4                  | 2.49E-01 | 2                  | 6.30E-01 | 2                  | 6.30E-01 | 2                  | 6.38E-01 | 2                  | 6.38E-01 |
| VAV3      | 1   | 2                  | 1.62E-02 | 2                  | 1.62E-02 |                    |          |                    |          | 2                  | 6.30E-01 | 2                  | 6.30E-01 |
| OR2A25    | 7   | 1                  | 7.13E-02 | 1                  | 7.13E-02 |                    |          |                    |          | 1                  | 6.30E-01 | 1                  | 6.30E-01 |
| ARHG E F7 | 13  | 3                  | 6.68E-01 | 3                  | 6.68E-01 | 2                  | 6.48E-01 | 2                  | 6.48E-01 | 1                  | 6.30E-01 | 1                  | 6.30E-01 |
| EHD2      | 19  | 1                  | 7.13E-02 | 1                  | 7.13E-02 |                    |          |                    |          | 1                  | 6.30E-01 | 1                  | 6.30E-01 |
| LRRC4C    | 11  | 2                  | 1.00E+00 | 2                  | 1.00E+00 | 2                  | 7.34E-01 | 2                  | 7.34E-01 | 1                  | 6.30E-01 | 1                  | 6.30E-01 |
| OR7D4     | 19  | 1                  | 7.13E-02 | 1                  | 7.13E-02 |                    |          |                    |          | 1                  | 6.30E-01 | 1                  | 6.30E-01 |
| SEC14L2   | 22  | 1                  | 7.13E-02 | 1                  | 7.13E-02 |                    |          |                    |          | 1                  | 6.30E-01 | 1                  | 6.30E-01 |
| HNRNPAB   | 5   | 2                  | 9.26E-01 | 2                  | 9.26E-01 | 2                  | 6.69E-01 | 2                  | 6.69E-01 | 1                  | 6.30E-01 | 1                  | 6.30E-01 |
| OTOP3     | 17  | 4                  | 6.44E-01 | 4                  | 6.44E-01 | 3                  | 8.22E-01 | 3                  | 8.22E-01 | 1                  | 6.30E-01 | 1                  | 6.30E-01 |
| CNST      | 1   | 3                  | 6.91E-01 | 3                  | 6.91E-01 | 2                  | 6.89E-01 | 2                  | 6.89E-01 | 1                  | 6.30E-01 | 1                  | 6.30E-01 |
| CHRM3     | 1   | 1                  | 8.68E-02 | 1                  | 8.68E-02 |                    |          |                    |          | 1                  | 6.30E-01 | 1                  | 6.30E-01 |
| ADCY3     | 2   | 1                  | 8.68E-02 | 1                  | 8.68E-02 |                    |          |                    |          | 1                  | 6.30E-01 | 1                  | 6.30E-01 |
| RASSF1    | 3   | 1                  | 8.68E-02 | 1                  | 8.68E-02 |                    |          |                    |          | 1                  | 6.30E-01 | 1                  | 6.30E-01 |
| ARNTL2    | 12  | 1                  | 8.68E-02 | 1                  | 8.68E-02 |                    |          |                    |          | 1                  | 6.30E-01 | 1                  | 6.30E-01 |
| ORC6      | 16  | 1                  | 8.68E-02 | 1                  | 8.68E-02 |                    |          |                    |          | 1                  | 6.30E-01 | 1                  | 6.30E-01 |
| EIF3H     | 8   | 1                  | 8.68E-02 | 1                  | 8.68E-02 |                    |          |                    |          | 1                  | 6.30E-01 | 1                  | 6.30E-01 |
| OR5T1     | 11  | 1                  | 8.68E-02 | 1                  | 8.68E-02 |                    |          |                    |          | 1                  | 6.30E-01 | 1                  | 6.30E-01 |
| TTC9      | 14  | 1                  | 8.68E-02 | 1                  | 8.68E-02 |                    |          |                    |          | 1                  | 6.30E-01 | 1                  | 6.30E-01 |
| HOXC4     | 12  | 1                  | 7.83E-01 | 1                  | 7.83E-01 | 1                  | 1.00E+00 | 1                  | 1.00E+00 | 1                  | 6.30E-01 | 1                  | 6.30E-01 |
| SLC22A31  | 16  | 1                  | 7.05E-02 | 1                  | 7.05E-02 |                    |          |                    |          | 1                  | 6.30E-01 | 1                  | 6.30E-01 |
| LMAN1L    | 15  | 3                  | 5.85E-01 | 4                  | 6.32E-01 | 3                  | 8.46E-01 | 4                  | 7.82E-01 | 1                  | 6.30E-01 | 2                  | 7.10E-01 |
| DGKG      | 3   | 3                  | 1.00E+00 | 3                  | 1.00E+00 | 3                  | 6.81E-01 | 3                  | 6.81E-01 | 1                  | 6.30E-01 | 1                  | 6.30E-01 |
| SLC12A6   | 15  | 2                  | 1.00E+00 | 2                  | 1.00E+00 | 2                  | 6.94E-01 | 2                  | 6.94E-01 | 1                  | 6.30E-01 | 1                  | 6.30E-01 |
| NNT       | 5   | 3                  | 6.60E-01 | 3                  | 6.60E-01 | 2                  | 6.30E-01 | 2                  | 6.30E-01 | 1                  | 6.68E-01 | 1                  | 6.68E-01 |
| MAPK9     | 5   | 2                  | 5.76E-01 | 2                  | 5.76E-01 | 2                  | 6.30E-01 | 2                  | 6.30E-01 |                    |          |                    |          |
| SERPINB2  | 18  | 3                  | 7.15E-01 | 3                  | 7.15E-01 | 2                  | 6.30E-01 | 2                  | 6.30E-01 | 2                  | 6.34E-01 | 2                  | 6.34E-01 |
| HSPA9     | 5   | 1                  | 7.64E-02 | 1                  | 7.64E-02 |                    |          |                    |          | 1                  | 6.30E-01 | 1                  | 6.30E-01 |
| MMP3      | 11  | 4                  | 8.23E-01 | 4                  | 8.23E-01 | 3                  | 7.68E-01 | 3                  | 7.68E-01 | 1                  | 6.30E-01 | 1                  | 6.30E-01 |
| ZNF486    | 19  | 1                  | 8.40E-01 | 1                  | 8.40E-01 | 1                  | 1.00E+00 | 1                  | 1.00E+00 | 1                  | 6.30E-01 | 1                  | 6.30E-01 |

| SetID   | Chr | ADEH- vs NA        |          |                    |          | ADEH+ vs ADEH-     |          |                    |          | ADEH+ vs NA        |          |                    |          |
|---------|-----|--------------------|----------|--------------------|----------|--------------------|----------|--------------------|----------|--------------------|----------|--------------------|----------|
|         |     | N variants in test | p-value  | N variants in test | p-value  | N variants in test | p-value  | N variants in test | p-value  | N variants in test | p-value  | N variants in test | p-value  |
| PHF10   | 6   | 1                  | 7.64E-02 | 1                  | 7.64E-02 |                    |          |                    |          | 1                  | 6.30E-01 | 1                  | 6.30E-01 |
| TOM1L1  | 17  | 1                  | 7.64E-02 | 1                  | 7.64E-02 |                    |          |                    |          | 1                  | 6.30E-01 | 1                  | 6.30E-01 |
| MRPL41  | 9   | 3                  | 6.90E-01 | 3                  | 6.90E-01 | 2                  | 6.33E-01 | 2                  | 6.33E-01 | 1                  | 6.30E-01 | 1                  | 6.30E-01 |
| PPP1R42 | 8   | 1                  | 7.64E-02 | 1                  | 7.64E-02 |                    |          |                    |          | 1                  | 6.30E-01 | 1                  | 6.30E-01 |
| PDE6H   | 12  | 1                  | 7.64E-02 | 1                  | 7.64E-02 |                    |          |                    |          | 1                  | 6.30E-01 | 1                  | 6.30E-01 |
| PTK7    | 6   | 1                  | 7.64E-02 | 1                  | 7.64E-02 |                    |          |                    |          | 1                  | 6.30E-01 | 1                  | 6.30E-01 |
| DNAJA2  | 16  | 3                  | 6.67E-01 | 3                  | 6.67E-01 | 2                  | 6.56E-01 | 2                  | 6.56E-01 | 1                  | 6.30E-01 | 1                  | 6.30E-01 |
| HMGXB4  | 22  | 2                  | 5.65E-01 | 2                  | 5.65E-01 | 2                  | 6.30E-01 | 2                  | 6.30E-01 |                    |          |                    |          |
| CELF3   | 1   | 2                  | 5.76E-01 | 2                  | 5.76E-01 | 2                  | 6.30E-01 | 2                  | 6.30E-01 |                    |          |                    |          |
| CCKAR   | 4   | 2                  | 5.79E-01 | 2                  | 5.79E-01 | 2                  | 6.30E-01 | 2                  | 6.30E-01 |                    |          |                    |          |
| NRG4    | 15  | 1                  | 8.54E-02 | 1                  | 8.54E-02 |                    |          |                    |          | 1                  | 6.31E-01 | 1                  | 6.31E-01 |
| WRAP53  | 17  | 1                  | 8.54E-02 | 1                  | 8.54E-02 |                    |          |                    |          | 1                  | 6.31E-01 | 1                  | 6.31E-01 |
| DDX59   | 1   | 1                  | 8.54E-02 | 1                  | 8.54E-02 |                    |          |                    |          | 1                  | 6.31E-01 | 1                  | 6.31E-01 |
| CYP4F2  | 19  | 3                  | 3.00E-01 | 3                  | 3.00E-01 | 2                  | 1.00E+00 | 2                  | 1.00E+00 | 1                  | 6.31E-01 | 1                  | 6.31E-01 |
| EYA3    | 1   | 1                  | 8.54E-02 | 1                  | 8.54E-02 |                    |          |                    |          | 1                  | 6.31E-01 | 1                  | 6.31E-01 |
| TAGLN   | 11  | 1                  | 8.54E-02 | 1                  | 8.54E-02 |                    |          |                    |          | 1                  | 6.31E-01 | 1                  | 6.31E-01 |
| UBE2F   | 2   | 1                  | 8.54E-02 | 1                  | 8.54E-02 |                    |          |                    |          | 1                  | 6.31E-01 | 1                  | 6.31E-01 |
| ANKK1   | 11  | 3                  | 7.30E-01 | 3                  | 7.30E-01 | 2                  | 6.33E-01 | 2                  | 6.33E-01 | 1                  | 6.31E-01 | 1                  | 6.31E-01 |
| ACPP    | 3   | 2                  | 5.68E-01 | 2                  | 5.68E-01 | 2                  | 6.31E-01 | 2                  | 6.31E-01 |                    |          |                    |          |
| DNAJC2  | 7   | 2                  | 1.84E-02 | 2                  | 1.84E-02 |                    |          |                    |          | 2                  | 6.31E-01 | 2                  | 6.31E-01 |
| TMBIM6  | 12  | 2                  | 1.77E-02 | 2                  | 1.77E-02 |                    |          |                    |          | 2                  | 6.31E-01 | 2                  | 6.31E-01 |
| RDH16   | 12  | 2                  | 5.77E-01 | 2                  | 5.77E-01 | 2                  | 6.31E-01 | 2                  | 6.31E-01 |                    |          |                    |          |
| RUFY3   | 4   | 2                  | 5.74E-01 | 2                  | 5.74E-01 | 2                  | 6.31E-01 | 2                  | 6.31E-01 |                    |          |                    |          |
| PROSER1 | 13  | 2                  | 5.77E-01 | 2                  | 5.77E-01 | 2                  | 6.31E-01 | 2                  | 6.31E-01 |                    |          |                    |          |
| PUS7    | 7   | 2                  | 2.03E-02 | 2                  | 2.03E-02 |                    |          |                    |          | 2                  | 6.31E-01 | 2                  | 6.31E-01 |
| SNX27   | 1   | 2                  | 5.83E-01 | 2                  | 5.83E-01 | 2                  | 6.31E-01 | 2                  | 6.31E-01 |                    |          |                    |          |
| C4orf22 | 4   | 2                  | 1.76E-02 | 2                  | 1.76E-02 |                    |          |                    |          | 2                  | 6.31E-01 | 2                  | 6.31E-01 |
| MFAP1   | 15  | 2                  | 1.76E-02 | 2                  | 1.76E-02 |                    |          |                    |          | 2                  | 6.31E-01 | 2                  | 6.31E-01 |
| TRIM69  | 15  | 3                  | 7.10E-01 | 3                  | 7.10E-01 | 2                  | 6.31E-01 | 2                  | 6.31E-01 | 1                  | 6.63E-01 | 1                  | 6.63E-01 |
| HPDL    | 1   | 2                  | 5.73E-01 | 2                  | 5.73E-01 | 2                  | 6.31E-01 | 2                  | 6.31E-01 |                    |          |                    |          |
| ANKAR   | 2   | 2                  | 3.02E-01 | 2                  | 3.02E-01 | 2                  | 6.31E-01 | 2                  | 6.31E-01 |                    |          |                    |          |
| CCDC15  | 11  | 2                  | 5.63E-01 | 2                  | 5.63E-01 | 2                  | 6.31E-01 | 2                  | 6.31E-01 |                    |          |                    |          |
| LRRC75B | 22  | 2                  | 5.72E-01 | 2                  | 5.72E-01 | 2                  | 6.31E-01 | 2                  | 6.31E-01 |                    |          |                    |          |
| SDC1    | 2   | 2                  | 1.00E+00 | 2                  | 1.00E+00 | 2                  | 6.63E-01 | 2                  | 6.63E-01 | 1                  | 6.31E-01 | 1                  | 6.31E-01 |
| PAK4    | 19  | 3                  | 5.08E-01 | 3                  | 5.08E-01 | 2                  | 6.98E-01 | 2                  | 6.98E-01 | 1                  | 6.31E-01 | 1                  | 6.31E-01 |
| ZRANB3  | 2   | 4                  | 8.64E-01 | 4                  | 8.64E-01 | 3                  | 7.32E-01 | 3                  | 7.32E-01 | 2                  | 6.31E-01 | 2                  | 6.31E-01 |
| SLCO1B3 | 12  | 4                  | 2.12E-01 | 5                  | 2.07E-01 | 4                  | 6.31E-01 | 5                  | 6.51E-01 |                    |          | 1                  | 1.00E+00 |
| PDLIM3  | 4   | 2                  | 5.73E-01 | 2                  | 5.73E-01 | 2                  | 6.31E-01 | 2                  | 6.31E-01 |                    |          |                    |          |
| RHOBTB1 | 10  | 2                  | 5.63E-01 | 2                  | 5.63E-01 | 2                  | 6.31E-01 | 2                  | 6.31E-01 |                    |          |                    |          |
| OIT3    | 10  | 2                  | 5.79E-01 | 2                  | 5.79E-01 | 2                  | 6.31E-01 | 2                  | 6.31E-01 |                    |          |                    |          |
| SCO2    | 22  | 3                  | 3.09E-01 | 3                  | 3.09E-01 | 3                  | 6.31E-01 | 3                  | 6.31E-01 |                    |          |                    |          |
| TINAGL1 | 1   | 2                  | 1.70E-02 | 2                  | 1.70E-02 |                    |          |                    |          | 2                  | 6.31E-01 | 2                  | 6.31E-01 |
| FILIP1L | 3   | 2                  | 5.64E-01 | 2                  | 5.64E-01 | 2                  | 6.31E-01 | 2                  | 6.31E-01 |                    |          |                    |          |
| SLC4A4  | 4   | 4                  | 8.58E-01 | 4                  | 8.58E-01 | 3                  | 6.68E-01 | 3                  | 6.68E-01 | 2                  | 6.31E-01 | 2                  | 6.31E-01 |
| PCOLCE2 | 3   | 3                  | 7.21E-01 | 3                  | 7.21E-01 | 2                  | 6.31E-01 | 2                  | 6.31E-01 | 1                  | 6.98E-01 | 1                  | 6.98E-01 |
| STKLD1  | 9   | 2                  | 2.59E-02 | 2                  | 2.59E-02 |                    |          |                    |          | 2                  | 6.31E-01 | 2                  | 6.31E-01 |
| NT5C3A  | 7   | 2                  | 1.48E-02 | 2                  | 1.48E-02 |                    |          |                    |          | 2                  | 6.31E-01 | 2                  | 6.31E-01 |
| CRB3    | 19  | 2                  | 5.68E-01 | 2                  | 5.68E-01 | 2                  | 6.32E-01 | 2                  | 6.32E-01 |                    |          |                    |          |

| SetID     | Chr | ADEH- vs NA        |          |                    |          | ADEH+ vs ADEH-     |          |                    |          | ADEH+ vs NA        |          |                    |          |
|-----------|-----|--------------------|----------|--------------------|----------|--------------------|----------|--------------------|----------|--------------------|----------|--------------------|----------|
|           |     | rare novel         |          | all                |          | rare novel         |          | all                |          | rare novel         |          | all                |          |
|           |     | N variants in test | p-value  | N variants in test | p-value  | N variants in test | p-value  | N variants in test | p-value  | N variants in test | p-value  | N variants in test | p-value  |
| IL10RA    | 11  | 2                  | 5.69E-01 | 2                  | 5.69E-01 | 2                  | 6.32E-01 | 2                  | 6.32E-01 |                    |          |                    |          |
| PAQR4     | 16  | 2                  | 5.75E-01 | 2                  | 5.75E-01 | 2                  | 6.32E-01 | 2                  | 6.32E-01 |                    |          |                    |          |
| TMEM156   | 4   | 2                  | 5.09E-01 | 2                  | 5.09E-01 | 2                  | 1.00E+00 | 2                  | 1.00E+00 | 1                  | 6.32E-01 | 1                  | 6.32E-01 |
| NAGPA     | 16  | 5                  | 5.38E-01 | 5                  | 5.38E-01 | 3                  | 6.54E-01 | 3                  | 6.54E-01 | 2                  | 6.32E-01 | 2                  | 6.32E-01 |
| FLT4      | 5   | 3                  | 3.33E-01 | 3                  | 3.33E-01 | 3                  | 6.32E-01 | 3                  | 6.32E-01 |                    |          |                    |          |
| FRMD1     | 6   | 2                  | 5.80E-01 | 2                  | 5.80E-01 | 2                  | 6.32E-01 | 2                  | 6.32E-01 |                    |          |                    |          |
| LIG4      | 13  | 1                  | 6.01E-02 | 1                  | 6.01E-02 |                    |          |                    |          | 1                  | 6.32E-01 | 1                  | 6.32E-01 |
| RASGRP2   | 11  | 1                  | 6.01E-02 | 1                  | 6.01E-02 |                    |          |                    |          | 1                  | 6.32E-01 | 1                  | 6.32E-01 |
| KIF2C     | 1   | 1                  | 6.01E-02 | 1                  | 6.01E-02 |                    |          |                    |          | 1                  | 6.32E-01 | 1                  | 6.32E-01 |
| CTTN      | 11  | 2                  | 9.25E-01 | 2                  | 9.25E-01 | 2                  | 6.49E-01 | 2                  | 6.49E-01 | 1                  | 6.32E-01 | 1                  | 6.32E-01 |
| C14orf166 | 14  | 3                  | 4.49E-01 | 3                  | 4.49E-01 | 2                  | 7.04E-01 | 2                  | 7.04E-01 | 1                  | 6.32E-01 | 1                  | 6.32E-01 |
| MGARP     | 4   | 1                  | 6.01E-02 | 1                  | 6.01E-02 |                    |          |                    |          | 1                  | 6.32E-01 | 1                  | 6.32E-01 |
| ZNF408    | 11  | 2                  | 5.74E-01 | 2                  | 5.74E-01 | 2                  | 6.32E-01 | 2                  | 6.32E-01 |                    |          |                    |          |
| VPS33B    | 15  | 5                  | 4.63E-01 | 5                  | 4.63E-01 | 3                  | 6.60E-01 | 3                  | 6.60E-01 | 2                  | 6.32E-01 | 2                  | 6.32E-01 |
| PRSS27    | 16  | 2                  | 5.69E-01 | 2                  | 5.69E-01 | 2                  | 6.32E-01 | 2                  | 6.32E-01 |                    |          |                    |          |
| DNMT3B    | 20  | 3                  | 5.35E-01 | 3                  | 5.35E-01 | 2                  | 6.35E-01 | 2                  | 6.35E-01 | 1                  | 6.32E-01 | 1                  | 6.32E-01 |
| DDR1      | 6   | 1                  | 8.94E-02 | 1                  | 8.94E-02 |                    |          |                    |          | 1                  | 6.32E-01 | 1                  | 6.32E-01 |
| LIM2      | 19  | 1                  | 8.94E-02 | 1                  | 8.94E-02 |                    |          |                    |          | 1                  | 6.32E-01 | 1                  | 6.32E-01 |
| M6PR      | 12  | 1                  | 8.94E-02 | 1                  | 8.94E-02 |                    |          |                    |          | 1                  | 6.32E-01 | 1                  | 6.32E-01 |
| SLC35G2   | 3   | 2                  | 5.80E-01 | 2                  | 5.80E-01 | 2                  | 6.32E-01 | 2                  | 6.32E-01 |                    |          |                    |          |
| LYRM1     | 16  | 2                  | 5.58E-01 | 2                  | 5.58E-01 | 2                  | 6.32E-01 | 2                  | 6.32E-01 |                    |          |                    |          |
| BLVRA     | 7   | 2                  | 5.69E-01 | 2                  | 5.69E-01 | 2                  | 6.32E-01 | 2                  | 6.32E-01 |                    |          |                    |          |
| GTSF1     | 12  | 2                  | 5.64E-01 | 2                  | 5.64E-01 | 2                  | 6.32E-01 | 2                  | 6.32E-01 |                    |          |                    |          |
| SLC2A10   | 20  | 2                  | 1.62E-02 | 2                  | 1.62E-02 |                    |          |                    |          | 2                  | 6.32E-01 | 2                  | 6.32E-01 |
| MTSS1     | 8   | 2                  | 5.52E-01 | 2                  | 5.52E-01 | 2                  | 6.32E-01 | 2                  | 6.32E-01 |                    |          |                    |          |
| RASGEF1C  | 5   | 2                  | 2.25E-02 | 2                  | 2.25E-02 |                    |          |                    |          | 2                  | 6.32E-01 | 2                  | 6.32E-01 |
| ANKRD29   | 18  | 3                  | 3.20E-01 | 3                  | 3.20E-01 | 3                  | 6.32E-01 | 3                  | 6.32E-01 |                    |          |                    |          |
| DHRS2     | 14  | 9                  | 3.15E-01 | 9                  | 3.15E-01 | 9                  | 6.84E-01 | 9                  | 6.84E-01 | 4                  | 6.32E-01 | 4                  | 6.32E-01 |
| PCBP4     | 3   | 2                  | 5.70E-01 | 2                  | 5.70E-01 | 2                  | 6.32E-01 | 2                  | 6.32E-01 |                    |          |                    |          |
| AIF1L     | 9   | 2                  | 5.54E-01 | 2                  | 5.54E-01 | 2                  | 6.33E-01 | 2                  | 6.33E-01 |                    |          |                    |          |
| ANKRD17   | 4   | 2                  | 5.70E-01 | 2                  | 5.70E-01 | 2                  | 6.33E-01 | 2                  | 6.33E-01 |                    |          |                    |          |
| AMDHD1    | 12  | 3                  | 3.38E-01 | 3                  | 3.38E-01 | 3                  | 6.33E-01 | 3                  | 6.33E-01 |                    |          |                    |          |
| ADAD2     | 16  | 3                  | 3.15E-01 | 3                  | 3.15E-01 | 3                  | 6.33E-01 | 3                  | 6.33E-01 |                    |          |                    |          |
| COPG1     | 3   | 2                  | 5.77E-01 | 2                  | 5.77E-01 | 2                  | 6.33E-01 | 2                  | 6.33E-01 |                    |          |                    |          |
| LAP3      | 4   | 2                  | 5.84E-01 | 2                  | 5.84E-01 | 2                  | 6.33E-01 | 2                  | 6.33E-01 |                    |          |                    |          |
| PTGIS     | 20  | 4                  | 7.35E-01 | 4                  | 7.35E-01 | 4                  | 6.39E-01 | 4                  | 6.39E-01 | 1                  | 6.33E-01 | 1                  | 6.33E-01 |
| SOD1      | 21  | 1                  | 8.55E-02 | 1                  | 8.55E-02 |                    |          |                    |          | 1                  | 6.33E-01 | 1                  | 6.33E-01 |
| ZSCAN23   | 6   | 1                  | 8.55E-02 | 1                  | 8.55E-02 |                    |          |                    |          | 1                  | 6.33E-01 | 1                  | 6.33E-01 |
| GJC1      | 17  | 1                  | 8.55E-02 | 1                  | 8.55E-02 |                    |          |                    |          | 1                  | 6.33E-01 | 1                  | 6.33E-01 |
| SF3B5     | 6   | 1                  | 8.55E-02 | 1                  | 8.55E-02 |                    |          |                    |          | 1                  | 6.33E-01 | 1                  | 6.33E-01 |
| NCLN      | 19  | 1                  | 8.55E-02 | 1                  | 8.55E-02 |                    |          |                    |          | 1                  | 6.33E-01 | 1                  | 6.33E-01 |
| SUFU      | 10  | 2                  | 1.83E-02 | 2                  | 1.83E-02 |                    |          |                    |          | 2                  | 6.33E-01 | 2                  | 6.33E-01 |
| TSPAN1    | 1   | 1                  | 7.23E-01 | 1                  | 7.23E-01 | 1                  | 6.33E-01 | 1                  | 6.33E-01 |                    |          |                    |          |
| IMPA1     | 8   | 1                  | 7.23E-01 | 1                  | 7.23E-01 | 1                  | 6.33E-01 | 1                  | 6.33E-01 |                    |          |                    |          |
| NR4A3     | 9   | 1                  | 7.23E-01 | 1                  | 7.23E-01 | 1                  | 6.33E-01 | 1                  | 6.33E-01 |                    |          |                    |          |
| HARBI1    | 11  | 1                  | 7.23E-01 | 1                  | 7.23E-01 | 1                  | 6.33E-01 | 1                  | 6.33E-01 |                    |          |                    |          |
| TUBGCP4   | 15  | 1                  | 7.23E-01 | 1                  | 7.23E-01 | 1                  | 6.33E-01 | 1                  | 6.33E-01 |                    |          |                    |          |
| TYROBP    | 19  | 1                  | 7.23E-01 | 1                  | 7.23E-01 | 1                  | 6.33E-01 | 1                  | 6.33E-01 |                    |          |                    |          |

| SetID       | Chr | ADEH- vs NA        |          |                    |          | ADEH+ vs ADEH-     |          |                    |          | ADEH+ vs NA        |          |                    |          |
|-------------|-----|--------------------|----------|--------------------|----------|--------------------|----------|--------------------|----------|--------------------|----------|--------------------|----------|
|             |     | rarenovel          |          | all                |          | rarenovel          |          | all                |          | rarenovel          |          | all                |          |
|             |     | N variants in test | p-value  | N variants in test | p-value  | N variants in test | p-value  | N variants in test | p-value  | N variants in test | p-value  | N variants in test | p-value  |
| PANK3       | 5   | 1                  | 7.23E-01 | 1                  | 7.23E-01 | 1                  | 6.33E-01 | 1                  | 6.33E-01 |                    |          |                    |          |
| ABRA        | 8   | 2                  | 2.70E-01 | 2                  | 2.70E-01 | 1                  | 6.33E-01 | 1                  | 6.33E-01 | 1                  | 6.43E-01 | 1                  | 6.43E-01 |
| PLEKHA5     | 12  | 2                  | 3.50E-01 | 2                  | 3.50E-01 | 1                  | 6.33E-01 | 1                  | 6.33E-01 | 1                  | 6.46E-01 | 1                  | 6.46E-01 |
| BTBD2       | 19  | 2                  | 5.67E-01 | 2                  | 5.67E-01 | 2                  | 6.33E-01 | 2                  | 6.33E-01 |                    |          |                    |          |
| CHML        | 1   | 2                  | 5.52E-01 | 2                  | 5.52E-01 | 2                  | 6.33E-01 | 2                  | 6.33E-01 |                    |          |                    |          |
| SLC4A2      | 7   | 2                  | 5.68E-01 | 2                  | 5.68E-01 | 2                  | 6.33E-01 | 2                  | 6.33E-01 |                    |          |                    |          |
| FAM20B      | 1   | 2                  | 5.79E-01 | 2                  | 5.79E-01 | 2                  | 6.33E-01 | 2                  | 6.33E-01 |                    |          |                    |          |
| GRIK4       | 11  | 3                  | 3.40E-01 | 3                  | 3.40E-01 | 3                  | 6.33E-01 | 3                  | 6.33E-01 |                    |          |                    |          |
| SMAD7       | 18  | 1                  | 6.77E-02 | 1                  | 6.77E-02 |                    |          |                    |          | 1                  | 6.33E-01 | 1                  | 6.33E-01 |
| DAW1        | 2   | 2                  | 1.86E-02 | 2                  | 1.86E-02 |                    |          |                    |          | 2                  | 6.33E-01 | 2                  | 6.33E-01 |
| TMEM68      | 8   | 2                  | 9.10E-01 | 2                  | 9.10E-01 | 2                  | 6.33E-01 | 2                  | 6.33E-01 | 1                  | 6.45E-01 | 1                  | 6.45E-01 |
| ITCH        | 20  | 1                  | 7.53E-02 | 1                  | 7.53E-02 |                    |          |                    |          | 1                  | 6.33E-01 | 1                  | 6.33E-01 |
| CAV3        | 3   | 1                  | 7.53E-02 | 1                  | 7.53E-02 |                    |          |                    |          | 1                  | 6.33E-01 | 1                  | 6.33E-01 |
| CRBN        | 3   | 1                  | 7.53E-02 | 1                  | 7.53E-02 |                    |          |                    |          | 1                  | 6.33E-01 | 1                  | 6.33E-01 |
| ZNF92       | 7   | 1                  | 7.53E-02 | 1                  | 7.53E-02 |                    |          |                    |          | 1                  | 6.33E-01 | 1                  | 6.33E-01 |
| APEX1       | 14  | 3                  | 4.91E-01 | 3                  | 4.91E-01 | 2                  | 6.76E-01 | 2                  | 6.76E-01 | 1                  | 6.33E-01 | 1                  | 6.33E-01 |
| OTUD7A      | 15  | 2                  | 1.62E-02 | 2                  | 1.62E-02 |                    |          |                    |          | 2                  | 6.33E-01 | 2                  | 6.33E-01 |
| TRIM28      | 19  | 2                  | 5.76E-01 | 2                  | 5.76E-01 | 2                  | 6.33E-01 | 2                  | 6.33E-01 |                    |          |                    |          |
| TM4SF4      | 3   | 2                  | 2.67E-02 | 2                  | 2.67E-02 |                    |          |                    |          | 2                  | 6.33E-01 | 2                  | 6.33E-01 |
| RPS6KL1     | 14  | 1                  | 7.42E-02 | 1                  | 7.42E-02 |                    |          |                    |          | 1                  | 6.33E-01 | 1                  | 6.33E-01 |
| P4HB        | 17  | 1                  | 7.42E-02 | 1                  | 7.42E-02 |                    |          |                    |          | 1                  | 6.33E-01 | 1                  | 6.33E-01 |
| SDR16C5     | 8   | 2                  | 1.00E+00 | 2                  | 1.00E+00 | 2                  | 6.92E-01 | 2                  | 6.92E-01 | 1                  | 6.33E-01 | 1                  | 6.33E-01 |
| FOXB2       | 9   | 3                  | 4.67E-01 | 3                  | 4.67E-01 | 2                  | 7.74E-01 | 2                  | 7.74E-01 | 1                  | 6.33E-01 | 1                  | 6.33E-01 |
| CARD10      | 22  | 3                  | 6.26E-01 | 3                  | 6.26E-01 | 2                  | 6.58E-01 | 2                  | 6.58E-01 | 1                  | 6.33E-01 | 1                  | 6.33E-01 |
| ZDHHC8      | 22  | 1                  | 7.42E-02 | 1                  | 7.42E-02 |                    |          |                    |          | 1                  | 6.33E-01 | 1                  | 6.33E-01 |
| NPAS2       | 2   | 2                  | 5.74E-01 | 2                  | 5.74E-01 | 2                  | 6.33E-01 | 2                  | 6.33E-01 |                    |          |                    |          |
| CCNG1       | 5   | 2                  | 5.68E-01 | 2                  | 5.68E-01 | 2                  | 6.33E-01 | 2                  | 6.33E-01 |                    |          |                    |          |
| SETD3       | 14  | 2                  | 5.70E-01 | 2                  | 5.70E-01 | 2                  | 6.33E-01 | 2                  | 6.33E-01 |                    |          |                    |          |
| PDZD7       | 10  | 2                  | 5.93E-01 | 2                  | 5.93E-01 | 1                  | 1.00E+00 | 1                  | 1.00E+00 | 2                  | 6.33E-01 | 2                  | 6.33E-01 |
| PAPPA2      | 1   | 4                  | 3.07E-01 | 4                  | 3.07E-01 | 2                  | 6.33E-01 | 2                  | 6.33E-01 | 2                  | 6.53E-01 | 2                  | 6.53E-01 |
| KCNK2       | 1   | 2                  | 5.77E-01 | 2                  | 5.77E-01 | 2                  | 6.33E-01 | 2                  | 6.33E-01 |                    |          |                    |          |
| SERPINH1    | 11  | 2                  | 5.74E-01 | 2                  | 5.74E-01 | 2                  | 6.33E-01 | 2                  | 6.33E-01 |                    |          |                    |          |
| MRPL34      | 19  | 1                  | 6.25E-02 | 1                  | 6.25E-02 |                    |          |                    |          | 1                  | 6.33E-01 | 1                  | 6.33E-01 |
| SORT1       | 1   | 3                  | 4.43E-01 | 3                  | 4.43E-01 | 2                  | 7.05E-01 | 2                  | 7.05E-01 | 1                  | 6.33E-01 | 1                  | 6.33E-01 |
| PSMD9       | 12  | 3                  | 5.76E-01 | 3                  | 5.76E-01 | 2                  | 6.37E-01 | 2                  | 6.37E-01 | 1                  | 6.33E-01 | 1                  | 6.33E-01 |
| RHOT2       | 16  | 3                  | 5.99E-01 | 4                  | 5.99E-01 | 2                  | 6.33E-01 | 3                  | 6.34E-01 | 1                  | 6.33E-01 | 2                  | 6.34E-01 |
| CRYAA       | 21  | 2                  | 2.24E-01 | 2                  | 2.24E-01 | 1                  | 6.49E-01 | 1                  | 6.49E-01 | 1                  | 6.33E-01 | 1                  | 6.33E-01 |
| LOC10272465 | 21  | 2                  | 2.24E-01 | 2                  | 2.24E-01 | 1                  | 6.49E-01 | 1                  | 6.49E-01 | 1                  | 6.33E-01 | 1                  | 6.33E-01 |
| ST6GAL1     | 3   | 1                  | 6.25E-02 | 1                  | 6.25E-02 |                    |          |                    |          | 1                  | 6.33E-01 | 1                  | 6.33E-01 |
| DMRT3       | 9   | 3                  | 4.65E-01 | 3                  | 4.65E-01 | 2                  | 7.26E-01 | 2                  | 7.26E-01 | 1                  | 6.33E-01 | 1                  | 6.33E-01 |
| MOGAT2      | 11  | 2                  | 5.65E-01 | 2                  | 5.65E-01 | 2                  | 6.33E-01 | 2                  | 6.33E-01 |                    |          |                    |          |
| TFRC        | 3   | 2                  | 5.62E-01 | 2                  | 5.62E-01 | 2                  | 6.33E-01 | 2                  | 6.33E-01 |                    |          |                    |          |
| ZFPL1       | 11  | 2                  | 5.76E-01 | 2                  | 5.76E-01 | 2                  | 6.33E-01 | 2                  | 6.33E-01 |                    |          |                    |          |
| MYO7B       | 2   | 10                 | 7.63E-01 | 10                 | 7.63E-01 | 10                 | 6.53E-01 | 10                 | 6.53E-01 | 5                  | 6.33E-01 | 5                  | 6.33E-01 |
| KRTAP1-5    | 17  | 3                  | 5.70E-01 | 3                  | 5.70E-01 | 2                  | 6.33E-01 | 2                  | 6.33E-01 | 1                  | 6.43E-01 | 1                  | 6.43E-01 |
| HOXD13      | 2   | 2                  | 5.75E-01 | 2                  | 5.75E-01 | 2                  | 6.34E-01 | 2                  | 6.34E-01 |                    |          |                    |          |
| PIGB        | 15  | 1                  | 7.11E-02 | 1                  | 7.11E-02 |                    |          |                    |          | 1                  | 6.34E-01 | 1                  | 6.34E-01 |
| SLC25A40    | 7   | 1                  | 7.11E-02 | 1                  | 7.11E-02 |                    |          |                    |          | 1                  | 6.34E-01 | 1                  | 6.34E-01 |

| SetID    | Chr | ADEH- vs NA        |          |                    |          | ADEH+ vs ADEH-     |          |                    |          | ADEH+ vs NA        |          |                    |          |
|----------|-----|--------------------|----------|--------------------|----------|--------------------|----------|--------------------|----------|--------------------|----------|--------------------|----------|
|          |     | rarenovel          |          | all                |          | rarenovel          |          | all                |          | rarenovel          |          | all                |          |
|          |     | N variants in test | p-value  | N variants in test | p-value  | N variants in test | p-value  | N variants in test | p-value  | N variants in test | p-value  | N variants in test | p-value  |
| LRRC38   | 1   | 1                  | 7.11E-02 | 1                  | 7.11E-02 |                    |          |                    |          | 1                  | 6.34E-01 | 1                  | 6.34E-01 |
| SLC20A2  | 8   | 1                  | 7.11E-02 | 1                  | 7.11E-02 |                    |          |                    |          | 1                  | 6.34E-01 | 1                  | 6.34E-01 |
| ARHGAP12 | 10  | 1                  | 7.11E-02 | 1                  | 7.11E-02 |                    |          |                    |          | 1                  | 6.34E-01 | 1                  | 6.34E-01 |
| DDOST    | 1   | 2                  | 5.80E-01 | 2                  | 5.80E-01 | 2                  | 6.34E-01 | 2                  | 6.34E-01 |                    |          |                    |          |
| GTF2H4   | 6   | 1                  | 6.85E-01 | 1                  | 6.85E-01 | 1                  | 6.34E-01 | 1                  | 6.34E-01 | 1                  | 1.00E+00 | 1                  | 1.00E+00 |
| ZNF792   | 19  | 4                  | 8.65E-01 | 4                  | 8.65E-01 | 3                  | 6.34E-01 | 3                  | 6.34E-01 | 1                  | 6.34E-01 | 1                  | 6.34E-01 |
| SLC28A3  | 9   | 2                  | 5.77E-01 | 2                  | 5.77E-01 | 2                  | 6.34E-01 | 2                  | 6.34E-01 |                    |          |                    |          |
| NRXN3    | 14  | 5                  | 5.32E-01 | 5                  | 5.32E-01 | 3                  | 7.74E-01 | 3                  | 7.74E-01 | 2                  | 6.34E-01 | 2                  | 6.34E-01 |
| OR13J1   | 9   | 2                  | 9.30E-01 | 2                  | 9.30E-01 | 2                  | 6.34E-01 | 2                  | 6.34E-01 | 1                  | 6.41E-01 | 1                  | 6.41E-01 |
| HHLA1    | 8   | 2                  | 5.68E-01 | 2                  | 5.68E-01 | 2                  | 6.34E-01 | 2                  | 6.34E-01 |                    |          |                    |          |
| ZNF626   | 19  | 2                  | 2.64E-02 | 2                  | 2.64E-02 |                    |          |                    |          | 2                  | 6.34E-01 | 2                  | 6.34E-01 |
| OR13C4   | 9   | 3                  | 7.50E-01 | 3                  | 7.50E-01 | 2                  | 6.34E-01 | 2                  | 6.34E-01 | 1                  | 6.34E-01 | 1                  | 6.34E-01 |
| TRPA1    | 8   | 2                  | 2.12E-02 | 2                  | 2.12E-02 |                    |          |                    |          | 2                  | 6.34E-01 | 2                  | 6.34E-01 |
| SCAP     | 3   | 2                  | 5.60E-01 | 2                  | 5.60E-01 | 2                  | 6.34E-01 | 2                  | 6.34E-01 |                    |          |                    |          |
| CAAP1    | 9   | 2                  | 5.64E-01 | 2                  | 5.64E-01 | 2                  | 6.34E-01 | 2                  | 6.34E-01 |                    |          |                    |          |
| BSPRY    | 9   | 2                  | 5.65E-01 | 2                  | 5.65E-01 | 2                  | 6.34E-01 | 2                  | 6.34E-01 |                    |          |                    |          |
| C12orf56 | 12  | 2                  | 5.75E-01 | 2                  | 5.75E-01 | 2                  | 6.34E-01 | 2                  | 6.34E-01 |                    |          |                    |          |
| GRB14    | 2   | 2                  | 5.80E-01 | 2                  | 5.80E-01 | 2                  | 6.34E-01 | 2                  | 6.34E-01 |                    |          |                    |          |
| FAM227B  | 15  | 1                  | 7.40E-02 | 1                  | 7.40E-02 |                    |          |                    |          | 1                  | 6.34E-01 | 1                  | 6.34E-01 |
| USP3     | 15  | 1                  | 7.40E-02 | 1                  | 7.40E-02 |                    |          |                    |          | 1                  | 6.34E-01 | 1                  | 6.34E-01 |
| RPA3     | 7   | 1                  | 7.40E-02 | 1                  | 7.40E-02 |                    |          |                    |          | 1                  | 6.34E-01 | 1                  | 6.34E-01 |
| EPHA5    | 4   | 3                  | 7.33E-01 | 3                  | 7.33E-01 | 2                  | 6.45E-01 | 2                  | 6.45E-01 | 1                  | 6.34E-01 | 1                  | 6.34E-01 |
| STIL     | 1   | 4                  | 8.60E-01 | 4                  | 8.60E-01 | 3                  | 7.53E-01 | 3                  | 7.53E-01 | 1                  | 6.34E-01 | 1                  | 6.34E-01 |
| RLBP1    | 15  | 1                  | 9.32E-02 | 1                  | 9.32E-02 |                    |          |                    |          | 1                  | 6.34E-01 | 1                  | 6.34E-01 |
| NRDC     | 1   | 1                  | 9.32E-02 | 1                  | 9.32E-02 |                    |          |                    |          | 1                  | 6.34E-01 | 1                  | 6.34E-01 |
| TMEM237  | 2   | 1                  | 9.32E-02 | 1                  | 9.32E-02 |                    |          |                    |          | 1                  | 6.34E-01 | 1                  | 6.34E-01 |
| PAOX     | 10  | 4                  | 5.94E-01 | 4                  | 5.94E-01 | 3                  | 6.34E-01 | 3                  | 6.34E-01 | 1                  | 6.68E-01 | 1                  | 6.68E-01 |
| KIAA0753 | 17  | 3                  | 6.36E-01 | 5                  | 6.36E-01 | 2                  | 6.34E-01 | 4                  | 6.34E-01 | 2                  | 6.41E-01 | 4                  | 6.41E-01 |
| GLB1L3   | 11  | 3                  | 7.58E-01 | 3                  | 7.58E-01 | 2                  | 6.56E-01 | 2                  | 6.56E-01 | 2                  | 6.34E-01 | 2                  | 6.34E-01 |
| CERS1    | 19  | 2                  | 6.34E-01 | 2                  | 6.34E-01 | 2                  | 6.34E-01 | 2                  | 6.34E-01 | 2                  | 6.36E-01 | 2                  | 6.36E-01 |
| COL22A1  | 8   | 4                  | 1.00E+00 | 4                  | 1.00E+00 | 4                  | 6.34E-01 | 4                  | 6.34E-01 | 1                  | 1.00E+00 | 1                  | 1.00E+00 |
| USP53    | 4   | 5                  | 5.33E-01 | 5                  | 5.33E-01 | 3                  | 7.78E-01 | 3                  | 7.78E-01 | 2                  | 6.34E-01 | 2                  | 6.34E-01 |
| VCL      | 10  | 5                  | 5.64E-01 | 5                  | 5.64E-01 | 3                  | 7.54E-01 | 3                  | 7.54E-01 | 2                  | 6.34E-01 | 2                  | 6.34E-01 |
| GSS      | 20  | 3                  | 3.39E-01 | 3                  | 3.39E-01 | 3                  | 6.34E-01 | 3                  | 6.34E-01 |                    |          |                    |          |
| ODF3     | 11  |                    |          | 1                  | 1.22E-01 |                    |          | 1                  | 6.34E-01 |                    |          | 1                  | 1.00E+00 |
| CARS2    | 13  | 2                  | 5.70E-01 | 2                  | 5.70E-01 | 2                  | 6.34E-01 | 2                  | 6.34E-01 |                    |          |                    |          |
| ST3GAL1  | 8   | 1                  | 6.79E-02 | 1                  | 6.79E-02 |                    |          |                    |          | 1                  | 6.34E-01 | 1                  | 6.34E-01 |
| CLIC6    | 21  | 3                  | 6.30E-01 | 3                  | 6.30E-01 | 2                  | 6.36E-01 | 2                  | 6.36E-01 | 1                  | 6.34E-01 | 1                  | 6.34E-01 |
| ZNF747   | 16  | 1                  | 8.32E-02 | 1                  | 8.32E-02 |                    |          |                    |          | 1                  | 6.34E-01 | 1                  | 6.34E-01 |
| BLOC1S5  | 6   | 1                  | 8.32E-02 | 1                  | 8.32E-02 |                    |          |                    |          | 1                  | 6.34E-01 | 1                  | 6.34E-01 |
| EFNB2    | 13  | 1                  | 8.32E-02 | 1                  | 8.32E-02 |                    |          |                    |          | 1                  | 6.34E-01 | 1                  | 6.34E-01 |
| KLHL6    | 3   | 1                  | 8.32E-02 | 1                  | 8.32E-02 |                    |          |                    |          | 1                  | 6.34E-01 | 1                  | 6.34E-01 |
| TOLLIP   | 11  | 1                  | 7.56E-02 | 1                  | 7.56E-02 |                    |          |                    |          | 1                  | 6.34E-01 | 1                  | 6.34E-01 |
| BPIFC    | 22  | 1                  | 7.56E-02 | 1                  | 7.56E-02 |                    |          |                    |          | 1                  | 6.34E-01 | 1                  | 6.34E-01 |
| NR1H2    | 19  | 1                  | 7.56E-02 | 1                  | 7.56E-02 |                    |          |                    |          | 1                  | 6.34E-01 | 1                  | 6.34E-01 |
| RPL9     | 4   | 1                  | 7.56E-02 | 1                  | 7.56E-02 |                    |          |                    |          | 1                  | 6.34E-01 | 1                  | 6.34E-01 |
| FAM135B  | 8   | 2                  | 1.92E-02 | 2                  | 1.92E-02 |                    |          |                    |          | 2                  | 6.34E-01 | 2                  | 6.34E-01 |
| BICD1    | 12  | 3                  | 6.34E-01 | 3                  | 6.34E-01 | 2                  | 6.39E-01 | 2                  | 6.39E-01 | 2                  | 6.34E-01 | 2                  | 6.34E-01 |

| SetID         | Chr | ADEH- vs NA        |          |                    |          | ADEH+ vs ADEH-     |          |                    |          | ADEH+ vs NA        |          |                    |          |
|---------------|-----|--------------------|----------|--------------------|----------|--------------------|----------|--------------------|----------|--------------------|----------|--------------------|----------|
|               |     | rarenovel          |          | all                |          | rarenovel          |          | all                |          | rarenovel          |          | all                |          |
|               |     | N variants in test | p-value  | N variants in test | p-value  | N variants in test | p-value  | N variants in test | p-value  | N variants in test | p-value  | N variants in test | p-value  |
| ETNPPL        | 4   | 2                  | 5.70E-01 | 2                  | 5.70E-01 | 2                  | 6.34E-01 | 2                  | 6.34E-01 |                    |          |                    |          |
| CNNM2         | 10  | 1                  | 7.65E-02 | 1                  | 7.65E-02 |                    |          |                    |          | 1                  | 6.34E-01 | 1                  | 6.34E-01 |
| GPR176        | 15  | 1                  | 7.65E-02 | 1                  | 7.65E-02 |                    |          |                    |          | 1                  | 6.34E-01 | 1                  | 6.34E-01 |
| SLC13A3       | 20  | 3                  | 6.23E-01 | 3                  | 6.23E-01 | 2                  | 6.37E-01 | 2                  | 6.37E-01 | 1                  | 6.34E-01 | 1                  | 6.34E-01 |
| TPST1         | 7   | 3                  | 1.00E+00 | 3                  | 1.00E+00 | 3                  | 7.06E-01 | 3                  | 7.06E-01 | 1                  | 6.34E-01 | 1                  | 6.34E-01 |
| DNPEP         | 2   | 2                  | 5.66E-01 | 2                  | 5.66E-01 | 2                  | 6.34E-01 | 2                  | 6.34E-01 |                    |          |                    |          |
| DARS          | 2   | 2                  | 5.65E-01 | 2                  | 5.65E-01 | 2                  | 6.35E-01 | 2                  | 6.35E-01 |                    |          |                    |          |
| PGAP1         | 2   | 3                  | 7.27E-01 | 3                  | 7.27E-01 | 2                  | 6.49E-01 | 2                  | 6.49E-01 | 2                  | 6.35E-01 | 2                  | 6.35E-01 |
| PKDCC         | 2   | 2                  | 5.59E-01 | 2                  | 5.59E-01 | 2                  | 6.35E-01 | 2                  | 6.35E-01 |                    |          |                    |          |
| TOR1B         | 9   | 2                  | 1.83E-02 | 2                  | 1.83E-02 |                    |          |                    |          | 2                  | 6.35E-01 | 2                  | 6.35E-01 |
| ITPR1         | 3   | 2                  | 5.58E-01 | 2                  | 5.58E-01 | 2                  | 6.35E-01 | 2                  | 6.35E-01 |                    |          |                    |          |
| ZSCAN29       | 15  | 5                  | 5.58E-01 | 5                  | 5.58E-01 | 3                  | 6.35E-01 | 3                  | 6.35E-01 | 2                  | 6.49E-01 | 2                  | 6.49E-01 |
| CASD1         | 7   | 2                  | 9.27E-01 | 2                  | 9.27E-01 | 2                  | 6.35E-01 | 2                  | 6.35E-01 | 1                  | 6.46E-01 | 1                  | 6.46E-01 |
| C2CD4D        | 1   | 2                  | 3.13E-01 | 2                  | 3.13E-01 | 2                  | 6.35E-01 | 2                  | 6.35E-01 |                    |          |                    |          |
| SPIDR         | 8   | 5                  | 5.01E-01 | 5                  | 5.01E-01 | 3                  | 7.32E-01 | 3                  | 7.32E-01 | 2                  | 6.35E-01 | 2                  | 6.35E-01 |
| CECR5         | 22  | 2                  | 5.79E-01 | 2                  | 5.79E-01 | 2                  | 6.35E-01 | 2                  | 6.35E-01 |                    |          |                    |          |
| HJURP         | 2   | 2                  | 5.61E-01 | 2                  | 5.61E-01 | 2                  | 6.35E-01 | 2                  | 6.35E-01 |                    |          |                    |          |
| EML5          | 14  | 2                  | 5.73E-01 | 2                  | 5.73E-01 | 2                  | 6.35E-01 | 2                  | 6.35E-01 |                    |          |                    |          |
| EIF2AK2       | 2   | 2                  | 5.66E-01 | 2                  | 5.66E-01 | 2                  | 6.35E-01 | 2                  | 6.35E-01 |                    |          |                    |          |
| PLPPR1        | 9   | 2                  | 5.71E-01 | 2                  | 5.71E-01 | 2                  | 6.35E-01 | 2                  | 6.35E-01 |                    |          |                    |          |
| PLK1          | 16  | 2                  | 1.56E-02 | 2                  | 1.56E-02 |                    |          |                    |          | 2                  | 6.35E-01 | 2                  | 6.35E-01 |
| DOC2A         | 16  | 2                  | 5.63E-01 | 2                  | 5.63E-01 | 2                  | 6.35E-01 | 2                  | 6.35E-01 |                    |          |                    |          |
| CDH1          | 16  | 5                  | 5.57E-01 | 5                  | 5.57E-01 | 3                  | 6.35E-01 | 3                  | 6.35E-01 | 2                  | 6.35E-01 | 2                  | 6.35E-01 |
| NKIRAS2       | 17  | 2                  | 5.78E-01 | 2                  | 5.78E-01 | 2                  | 6.35E-01 | 2                  | 6.35E-01 |                    |          |                    |          |
| VARS2         | 6   | 4                  | 3.15E-01 | 5                  | 3.24E-01 | 2                  | 6.35E-01 | 3                  | 7.25E-01 | 2                  | 6.45E-01 | 3                  | 6.48E-01 |
| SMYD4         | 17  | 2                  | 5.65E-01 | 4                  | 5.65E-01 | 2                  | 6.36E-01 | 4                  | 6.35E-01 | 2                  | 7.55E-01 | 2                  | 7.55E-01 |
| CEP70         | 3   | 6                  | 4.04E-01 | 6                  | 4.04E-01 | 6                  | 6.35E-01 | 6                  | 6.35E-01 | 2                  | 1.00E+00 | 2                  | 1.00E+00 |
| ANKDD1A       | 15  | 2                  | 1.41E-02 | 3                  | 1.41E-02 |                    |          | 1                  | 7.96E-01 | 2                  | 6.35E-01 | 3                  | 6.35E-01 |
| ARPIN         | 15  | 3                  | 7.39E-01 | 3                  | 7.39E-01 | 2                  | 6.35E-01 | 2                  | 6.35E-01 | 1                  | 6.98E-01 | 1                  | 6.98E-01 |
| C15orf38-AP3C | 15  | 3                  | 7.39E-01 | 3                  | 7.39E-01 | 2                  | 6.35E-01 | 2                  | 6.35E-01 | 1                  | 6.98E-01 | 1                  | 6.98E-01 |
| SPATA1        | 1   | 1                  | 6.04E-02 | 1                  | 6.04E-02 |                    |          |                    |          | 1                  | 6.35E-01 | 1                  | 6.35E-01 |
| CMTR2         | 16  | 2                  | 2.15E-01 | 2                  | 2.15E-01 | 1                  | 1.00E+00 | 1                  | 1.00E+00 | 1                  | 6.35E-01 | 1                  | 6.35E-01 |
| GATAD2A       | 19  | 1                  | 6.04E-02 | 1                  | 6.04E-02 |                    |          |                    |          | 1                  | 6.35E-01 | 1                  | 6.35E-01 |
| ERLEC1        | 2   | 1                  | 6.04E-02 | 1                  | 6.04E-02 |                    |          |                    |          | 1                  | 6.35E-01 | 1                  | 6.35E-01 |
| AKAP1         | 17  | 3                  | 6.01E-01 | 3                  | 6.01E-01 | 2                  | 6.56E-01 | 2                  | 6.56E-01 | 1                  | 6.35E-01 | 1                  | 6.35E-01 |
| EAF2          | 3   | 2                  | 9.20E-01 | 2                  | 9.20E-01 | 2                  | 6.59E-01 | 2                  | 6.59E-01 | 1                  | 6.35E-01 | 1                  | 6.35E-01 |
| DYRK3         | 1   | 2                  | 5.67E-01 | 2                  | 5.67E-01 | 2                  | 6.35E-01 | 2                  | 6.35E-01 |                    |          |                    |          |
| TRIP10        | 19  | 2                  | 5.83E-01 | 2                  | 5.83E-01 | 2                  | 6.35E-01 | 2                  | 6.35E-01 |                    |          |                    |          |
| CACNB1        | 17  | 2                  | 5.46E-01 | 2                  | 5.46E-01 | 2                  | 6.35E-01 | 2                  | 6.35E-01 |                    |          |                    |          |
| DDX47         | 12  | 4                  | 3.30E-01 | 4                  | 3.30E-01 | 2                  | 6.35E-01 | 2                  | 6.35E-01 | 2                  | 6.50E-01 | 2                  | 6.50E-01 |
| APCDD1        | 18  | 1                  | 8.85E-02 | 1                  | 8.85E-02 |                    |          |                    |          | 1                  | 6.35E-01 | 1                  | 6.35E-01 |
| SLC41A2       | 12  | 1                  | 8.85E-02 | 1                  | 8.85E-02 |                    |          |                    |          | 1                  | 6.35E-01 | 1                  | 6.35E-01 |
| NTRK3         | 15  | 3                  | 5.33E-01 | 3                  | 5.33E-01 | 2                  | 6.72E-01 | 2                  | 6.72E-01 | 1                  | 6.35E-01 | 1                  | 6.35E-01 |
| ATP6V1H       | 8   | 1                  | 8.85E-02 | 1                  | 8.85E-02 |                    |          |                    |          | 1                  | 6.35E-01 | 1                  | 6.35E-01 |
| NTN1          | 17  | 1                  | 8.85E-02 | 1                  | 8.85E-02 |                    |          |                    |          | 1                  | 6.35E-01 | 1                  | 6.35E-01 |
| FAM76B        | 11  | 2                  | 7.07E-01 | 2                  | 7.07E-01 | 2                  | 1.00E+00 | 2                  | 1.00E+00 | 1                  | 6.35E-01 | 1                  | 6.35E-01 |
| ANO1          | 11  | 2                  | 2.46E-02 | 2                  | 2.46E-02 |                    |          |                    |          | 2                  | 6.36E-01 | 2                  | 6.36E-01 |
| GPR84         | 12  | 4                  | 8.62E-01 | 4                  | 8.62E-01 | 3                  | 6.51E-01 | 3                  | 6.51E-01 | 2                  | 6.36E-01 | 2                  | 6.36E-01 |

| SetID    | Chr | ADEH- vs NA        |          |                    |          | ADEH+ vs ADEH-     |          |                    |          | ADEH+ vs NA        |          |                    |          |
|----------|-----|--------------------|----------|--------------------|----------|--------------------|----------|--------------------|----------|--------------------|----------|--------------------|----------|
|          |     | rare novel         |          | all                |          | rare novel         |          | all                |          | rare novel         |          | all                |          |
|          |     | N variants in test | p-value  | N variants in test | p-value  | N variants in test | p-value  | N variants in test | p-value  | N variants in test | p-value  | N variants in test | p-value  |
| ZMYND8   | 20  | 2                  | 5.73E-01 | 2                  | 5.73E-01 | 2                  | 6.36E-01 | 2                  | 6.36E-01 |                    |          |                    |          |
| ASB4     | 7   | 4                  | 3.17E-01 | 4                  | 3.17E-01 | 2                  | 6.36E-01 | 2                  | 6.36E-01 | 2                  | 6.36E-01 | 2                  | 6.36E-01 |
| DPP6     | 7   | 2                  | 5.46E-01 | 2                  | 5.46E-01 | 2                  | 6.36E-01 | 2                  | 6.36E-01 |                    |          |                    |          |
| TVP23A   | 16  | 2                  | 5.75E-01 | 2                  | 5.75E-01 | 2                  | 6.36E-01 | 2                  | 6.36E-01 |                    |          |                    |          |
| KLHL33   | 14  | 3                  | 4.72E-01 | 3                  | 4.72E-01 | 2                  | 6.36E-01 | 2                  | 6.36E-01 | 1                  | 6.49E-01 | 1                  | 6.49E-01 |
| TBC1D14  | 4   | 2                  | 5.60E-01 | 2                  | 5.60E-01 | 2                  | 6.36E-01 | 2                  | 6.36E-01 |                    |          |                    |          |
| IQCH     | 15  | 5                  | 4.85E-01 | 5                  | 4.85E-01 | 3                  | 7.47E-01 | 3                  | 7.47E-01 | 2                  | 6.36E-01 | 2                  | 6.36E-01 |
| TBX3     | 12  | 1                  | 7.94E-02 | 1                  | 7.94E-02 |                    |          |                    |          | 1                  | 6.36E-01 | 1                  | 6.36E-01 |
| OSTC     | 4   | 1                  | 7.94E-02 | 1                  | 7.94E-02 |                    |          |                    |          | 1                  | 6.36E-01 | 1                  | 6.36E-01 |
| SLITRK5  | 13  | 2                  | 1.94E-02 | 2                  | 1.94E-02 |                    |          |                    |          | 2                  | 6.36E-01 | 2                  | 6.36E-01 |
| KLK5     | 19  | 2                  | 5.77E-01 | 2                  | 5.77E-01 | 2                  | 6.36E-01 | 2                  | 6.36E-01 |                    |          |                    |          |
| TLN1     | 9   | 2                  | 1.70E-02 | 2                  | 1.70E-02 |                    |          |                    |          | 2                  | 6.36E-01 | 2                  | 6.36E-01 |
| PCDH17   | 13  | 2                  | 5.79E-01 | 2                  | 5.79E-01 | 2                  | 6.36E-01 | 2                  | 6.36E-01 |                    |          |                    |          |
| AK7      | 14  | 4                  | 8.97E-01 | 4                  | 8.97E-01 | 3                  | 8.21E-01 | 3                  | 8.21E-01 | 2                  | 6.36E-01 | 2                  | 6.36E-01 |
| ARFGEF2  | 20  | 5                  | 8.95E-01 | 5                  | 8.95E-01 | 4                  | 6.36E-01 | 4                  | 6.36E-01 | 2                  | 6.51E-01 | 2                  | 6.51E-01 |
| COQ3     | 6   | 2                  | 5.77E-01 | 2                  | 5.77E-01 | 2                  | 6.36E-01 | 2                  | 6.36E-01 |                    |          |                    |          |
| HSPA12B  | 20  | 4                  | 8.65E-01 | 4                  | 8.65E-01 | 3                  | 7.60E-01 | 3                  | 7.60E-01 | 2                  | 6.36E-01 | 2                  | 6.36E-01 |
| ELAC1    | 18  | 2                  | 1.41E-02 | 2                  | 1.41E-02 |                    |          |                    |          | 2                  | 6.36E-01 | 2                  | 6.36E-01 |
| FAM111B  | 11  | 1                  | 8.09E-02 | 1                  | 8.09E-02 |                    |          |                    |          | 1                  | 6.36E-01 | 1                  | 6.36E-01 |
| CREB3L1  | 11  | 1                  | 8.09E-02 | 1                  | 8.09E-02 |                    |          |                    |          | 1                  | 6.36E-01 | 1                  | 6.36E-01 |
| KCMF1    | 2   | 1                  | 8.09E-02 | 1                  | 8.09E-02 |                    |          |                    |          | 1                  | 6.36E-01 | 1                  | 6.36E-01 |
| SUCNR1   | 3   | 1                  | 8.09E-02 | 1                  | 8.09E-02 |                    |          |                    |          | 1                  | 6.36E-01 | 1                  | 6.36E-01 |
| DAO      | 12  | 4                  | 8.15E-01 | 4                  | 8.15E-01 | 3                  | 7.42E-01 | 3                  | 7.42E-01 | 1                  | 6.36E-01 | 1                  | 6.36E-01 |
| BCL9L    | 11  | 3                  | 8.49E-01 | 3                  | 8.49E-01 | 2                  | 6.97E-01 | 2                  | 6.97E-01 | 2                  | 6.36E-01 | 2                  | 6.36E-01 |
| ASB13    | 10  | 2                  | 5.63E-01 | 2                  | 5.63E-01 | 2                  | 6.36E-01 | 2                  | 6.36E-01 |                    |          |                    |          |
| SLC25A24 | 1   | 2                  | 5.86E-01 | 2                  | 5.86E-01 | 2                  | 6.36E-01 | 2                  | 6.36E-01 |                    |          |                    |          |
| CDKL3    | 5   | 2                  | 5.86E-01 | 2                  | 5.86E-01 | 2                  | 6.36E-01 | 2                  | 6.36E-01 |                    |          |                    |          |
| TPH2     | 12  | 2                  | 1.72E-02 | 2                  | 1.72E-02 |                    |          |                    |          | 2                  | 6.36E-01 | 2                  | 6.36E-01 |
| MPO      | 17  | 5                  | 5.32E-01 | 5                  | 5.32E-01 | 3                  | 7.49E-01 | 3                  | 7.49E-01 | 2                  | 6.36E-01 | 2                  | 6.36E-01 |
| FAM118A  | 22  | 3                  | 6.43E-01 | 3                  | 6.43E-01 | 2                  | 6.36E-01 | 2                  | 6.36E-01 | 2                  | 6.38E-01 | 2                  | 6.38E-01 |
| ITGB5    | 3   | 2                  | 5.70E-01 | 2                  | 5.70E-01 | 2                  | 6.36E-01 | 2                  | 6.36E-01 |                    |          |                    |          |
| TOR1A    | 9   | 2                  | 5.77E-01 | 2                  | 5.77E-01 | 2                  | 6.36E-01 | 2                  | 6.36E-01 |                    |          |                    |          |
| M1AP     | 2   | 2                  | 3.15E-01 | 2                  | 3.15E-01 | 2                  | 6.36E-01 | 2                  | 6.36E-01 |                    |          |                    |          |
| HTR4     | 5   | 2                  | 1.89E-02 | 2                  | 1.89E-02 |                    |          |                    |          | 2                  | 6.36E-01 | 2                  | 6.36E-01 |
| SUCO     | 1   | 2                  | 5.74E-01 | 2                  | 5.74E-01 | 2                  | 6.37E-01 | 2                  | 6.37E-01 |                    |          |                    |          |
| TACR3    | 4   | 2                  | 5.73E-01 | 2                  | 5.73E-01 | 2                  | 6.37E-01 | 2                  | 6.37E-01 |                    |          |                    |          |
| SLC12A1  | 15  | 6                  | 6.98E-01 | 6                  | 6.98E-01 | 4                  | 6.46E-01 | 4                  | 6.46E-01 | 2                  | 6.37E-01 | 2                  | 6.37E-01 |
| HAUS8    | 19  | 2                  | 5.68E-01 | 2                  | 5.68E-01 | 2                  | 6.37E-01 | 2                  | 6.37E-01 |                    |          |                    |          |
| ZFPM2    | 8   | 2                  | 1.85E-02 | 2                  | 1.85E-02 |                    |          |                    |          | 2                  | 6.37E-01 | 2                  | 6.37E-01 |
| ESCO2    | 8   | 2                  | 5.67E-01 | 2                  | 5.67E-01 | 2                  | 6.37E-01 | 2                  | 6.37E-01 |                    |          |                    |          |
| TAGAP    | 6   | 4                  | 2.92E-01 | 4                  | 2.92E-01 | 2                  | 6.39E-01 | 2                  | 6.39E-01 | 2                  | 6.37E-01 | 2                  | 6.37E-01 |
| LENG8    | 19  | 4                  | 8.74E-01 | 4                  | 8.74E-01 | 3                  | 1.00E+00 | 3                  | 1.00E+00 | 2                  | 6.37E-01 | 2                  | 6.37E-01 |
| BRD1     | 22  | 4                  | 7.39E-01 | 4                  | 7.39E-01 | 3                  | 6.37E-01 | 3                  | 6.37E-01 | 1                  | 6.47E-01 | 1                  | 6.47E-01 |
| CNPY2    | 12  | 2                  | 5.60E-01 | 2                  | 5.60E-01 | 2                  | 6.37E-01 | 2                  | 6.37E-01 |                    |          |                    |          |
| ASTE1    | 3   | 2                  | 5.71E-01 | 2                  | 5.71E-01 | 2                  | 6.37E-01 | 2                  | 6.37E-01 |                    |          |                    |          |
| OR2M2    | 1   | 2                  | 3.21E-01 | 2                  | 3.21E-01 | 2                  | 6.37E-01 | 2                  | 6.37E-01 |                    |          |                    |          |
| ZBTB22   | 6   | 2                  | 2.06E-02 | 2                  | 2.06E-02 |                    |          |                    |          | 2                  | 6.37E-01 | 2                  | 6.37E-01 |
| NIFK     | 2   | 2                  | 1.53E-02 | 2                  | 1.53E-02 |                    |          |                    |          | 2                  | 6.37E-01 | 2                  | 6.37E-01 |





| SetID        | Chr | ADEH- vs NA        |          |                    |          | ADEH+ vs ADEH-     |          |                    |          | ADEH+ vs NA        |          |                    |          |
|--------------|-----|--------------------|----------|--------------------|----------|--------------------|----------|--------------------|----------|--------------------|----------|--------------------|----------|
|              |     | rarenovel          |          | all                |          | rarenovel          |          | all                |          | rarenovel          |          | all                |          |
|              |     | N variants in test | p-value  | N variants in test | p-value  | N variants in test | p-value  | N variants in test | p-value  | N variants in test | p-value  | N variants in test | p-value  |
| ZNF177       | 19  | 2                  | 5.77E-01 | 2                  | 5.77E-01 | 2                  | 6.38E-01 | 2                  | 6.38E-01 |                    |          |                    |          |
| ZNF559-ZNF17 | 19  | 2                  | 5.77E-01 | 2                  | 5.77E-01 | 2                  | 6.38E-01 | 2                  | 6.38E-01 |                    |          |                    |          |
| TXLNA        | 1   | 2                  | 1.77E-02 | 2                  | 1.77E-02 |                    |          |                    |          | 2                  | 6.38E-01 | 2                  | 6.38E-01 |
| C3AR1        | 12  | 2                  | 1.40E-02 | 2                  | 1.40E-02 |                    |          |                    |          | 2                  | 6.38E-01 | 2                  | 6.38E-01 |
| MOB2         | 11  | 3                  | 3.13E-01 | 3                  | 3.13E-01 | 3                  | 6.38E-01 | 3                  | 6.38E-01 |                    |          |                    |          |
| TRIM25       | 17  | 2                  | 5.60E-01 | 2                  | 5.60E-01 | 2                  | 6.38E-01 | 2                  | 6.38E-01 |                    |          |                    |          |
| FAM131B      | 7   | 2                  | 1.64E-02 | 2                  | 1.64E-02 |                    |          |                    |          | 2                  | 6.39E-01 | 2                  | 6.39E-01 |
| NFATC2       | 20  | 5                  | 4.39E-01 | 5                  | 4.39E-01 | 3                  | 7.98E-01 | 3                  | 7.98E-01 | 2                  | 6.39E-01 | 2                  | 6.39E-01 |
| KCTD18       | 2   | 2                  | 5.70E-01 | 2                  | 5.70E-01 | 2                  | 6.39E-01 | 2                  | 6.39E-01 |                    |          |                    |          |
| OAS2         | 12  | 2                  | 1.00E+00 | 3                  | 1.00E+00 | 2                  | 6.39E-01 | 3                  | 6.39E-01 | 1                  | 6.96E-01 | 2                  | 6.96E-01 |
| P2RX6        | 22  | 2                  | 5.71E-01 | 2                  | 5.71E-01 | 2                  | 6.39E-01 | 2                  | 6.39E-01 |                    |          |                    |          |
| ZNF618       | 9   | 3                  | 3.45E-01 | 3                  | 3.45E-01 | 3                  | 6.39E-01 | 3                  | 6.39E-01 |                    |          |                    |          |
| XYLT2        | 17  | 2                  | 5.67E-01 | 2                  | 5.67E-01 | 2                  | 6.39E-01 | 2                  | 6.39E-01 |                    |          |                    |          |
| CDK5RAP3     | 17  | 2                  | 5.76E-01 | 2                  | 5.76E-01 | 2                  | 6.39E-01 | 2                  | 6.39E-01 |                    |          |                    |          |
| CECR6        | 22  | 3                  | 8.59E-01 | 3                  | 8.59E-01 | 2                  | 7.06E-01 | 2                  | 7.06E-01 | 2                  | 6.39E-01 | 2                  | 6.39E-01 |
| THAP7        | 22  | 2                  | 5.75E-01 | 2                  | 5.75E-01 | 2                  | 6.39E-01 | 2                  | 6.39E-01 |                    |          |                    |          |
| ADGRB3       | 6   | 4                  | 8.94E-01 | 4                  | 8.94E-01 | 3                  | 8.02E-01 | 3                  | 8.02E-01 | 2                  | 6.39E-01 | 2                  | 6.39E-01 |
| PLOD2        | 3   | 4                  | 8.11E-01 | 4                  | 8.11E-01 | 3                  | 7.65E-01 | 3                  | 7.65E-01 | 2                  | 6.39E-01 | 2                  | 6.39E-01 |
| SNX15        | 11  | 5                  | 5.49E-01 | 5                  | 5.49E-01 | 3                  | 7.15E-01 | 3                  | 7.15E-01 | 2                  | 6.39E-01 | 2                  | 6.39E-01 |
| RCC1         | 1   | 2                  | 1.60E-02 | 2                  | 1.60E-02 |                    |          |                    |          | 2                  | 6.39E-01 | 2                  | 6.39E-01 |
| TEKT3        | 17  | 2                  | 1.72E-02 | 2                  | 1.72E-02 |                    |          |                    |          | 2                  | 6.39E-01 | 2                  | 6.39E-01 |
| STPG2        | 4   | 4                  | 2.50E-01 | 5                  | 2.50E-01 | 2                  | 6.39E-01 | 3                  | 6.39E-01 | 2                  | 6.43E-01 | 3                  | 6.43E-01 |
| INPP5B       | 1   | 2                  | 5.54E-01 | 3                  | 3.05E-01 | 2                  | 6.76E-01 | 3                  | 6.39E-01 |                    |          | 1                  | 6.63E-01 |
| GZMH         | 14  | 2                  | 5.67E-01 | 2                  | 5.67E-01 | 2                  | 6.39E-01 | 2                  | 6.39E-01 |                    |          |                    |          |
| C2orf40      | 2   | 2                  | 5.62E-01 | 2                  | 5.62E-01 | 2                  | 6.39E-01 | 2                  | 6.39E-01 |                    |          |                    |          |
| ASPH         | 8   | 4                  | 8.95E-01 | 4                  | 8.95E-01 | 3                  | 7.06E-01 | 3                  | 7.06E-01 | 2                  | 6.39E-01 | 2                  | 6.39E-01 |
| LAMP5        | 20  | 3                  | 7.48E-01 | 3                  | 7.48E-01 | 2                  | 6.39E-01 | 2                  | 6.39E-01 | 1                  | 6.69E-01 | 1                  | 6.69E-01 |
| SLC39A3      | 19  | 2                  | 5.82E-01 | 2                  | 5.82E-01 | 2                  | 6.39E-01 | 2                  | 6.39E-01 |                    |          |                    |          |
| LETMD1       | 12  | 2                  | 5.57E-01 | 2                  | 5.57E-01 | 2                  | 6.39E-01 | 2                  | 6.39E-01 |                    |          |                    |          |
| HDHD3        | 9   | 2                  | 5.80E-01 | 2                  | 5.80E-01 | 2                  | 6.39E-01 | 2                  | 6.39E-01 |                    |          |                    |          |
| ABCD2        | 12  | 2                  | 1.65E-02 | 2                  | 1.65E-02 |                    |          |                    |          | 2                  | 6.39E-01 | 2                  | 6.39E-01 |
| C2CD2        | 21  | 3                  | 5.87E-01 | 3                  | 5.87E-01 | 2                  | 6.39E-01 | 2                  | 6.39E-01 | 1                  | 6.57E-01 | 1                  | 6.57E-01 |
| SLC25A27     | 6   | 2                  | 5.67E-01 | 2                  | 5.67E-01 | 2                  | 6.39E-01 | 2                  | 6.39E-01 |                    |          |                    |          |
| NGEF         | 2   | 3                  | 7.69E-01 | 3                  | 7.69E-01 | 2                  | 6.61E-01 | 2                  | 6.61E-01 | 2                  | 6.39E-01 | 2                  | 6.39E-01 |
| GBA2         | 9   | 2                  | 1.76E-02 | 2                  | 1.76E-02 |                    |          |                    |          | 2                  | 6.39E-01 | 2                  | 6.39E-01 |
| C9orf50      | 9   | 2                  | 5.77E-01 | 2                  | 5.77E-01 | 2                  | 6.39E-01 | 2                  | 6.39E-01 |                    |          |                    |          |
| SUPT6H       | 17  | 3                  | 8.19E-01 | 3                  | 8.19E-01 | 2                  | 1.00E+00 | 2                  | 1.00E+00 | 2                  | 6.40E-01 | 2                  | 6.40E-01 |
| SLC16A3      | 17  | 4                  | 2.64E-01 | 4                  | 2.64E-01 | 2                  | 6.40E-01 | 2                  | 6.40E-01 | 2                  | 6.47E-01 | 2                  | 6.47E-01 |
| PLXND1       | 3   | 6                  | 6.13E-01 | 6                  | 6.13E-01 | 4                  | 8.51E-01 | 4                  | 8.51E-01 | 2                  | 6.40E-01 | 2                  | 6.40E-01 |
| LOXL2        | 8   | 3                  | 5.87E-01 | 3                  | 5.87E-01 | 2                  | 7.55E-01 | 2                  | 7.55E-01 | 2                  | 6.40E-01 | 2                  | 6.40E-01 |
| CPA1         | 7   | 2                  | 3.28E-01 | 2                  | 3.28E-01 | 2                  | 6.40E-01 | 2                  | 6.40E-01 |                    |          |                    |          |
| SIPA1        | 11  | 5                  | 4.69E-01 | 5                  | 4.69E-01 | 3                  | 7.98E-01 | 3                  | 7.98E-01 | 2                  | 6.40E-01 | 2                  | 6.40E-01 |
| FGFR3        | 4   | 4                  | 8.11E-01 | 4                  | 8.11E-01 | 3                  | 6.40E-01 | 3                  | 6.40E-01 | 2                  | 6.47E-01 | 2                  | 6.47E-01 |
| SERPINA12    | 14  | 5                  | 8.97E-01 | 5                  | 8.97E-01 | 5                  | 6.40E-01 | 5                  | 6.40E-01 | 3                  | 7.61E-01 | 3                  | 7.61E-01 |
| DSG3         | 18  | 6                  | 6.69E-01 | 6                  | 6.69E-01 | 5                  | 1.00E+00 | 5                  | 1.00E+00 | 4                  | 6.40E-01 | 4                  | 6.40E-01 |
| DENND5B      | 12  | 2                  | 1.57E-02 | 2                  | 1.57E-02 |                    |          |                    |          | 2                  | 6.40E-01 | 2                  | 6.40E-01 |
| POP1         | 8   | 4                  | 8.17E-01 | 5                  | 7.64E-01 | 3                  | 7.39E-01 | 4                  | 1.00E+00 | 2                  | 6.40E-01 | 3                  | 1.00E+00 |
| PNPLA2       | 11  | 1                  | 8.60E-02 | 1                  | 8.60E-02 |                    |          |                    |          | 1                  | 6.40E-01 | 1                  | 6.40E-01 |

| SetID     | Chr | ADEH- vs NA        |          |                    |          | ADEH+ vs ADEH-     |          |                    |          | ADEH+ vs NA        |          |                    |          |
|-----------|-----|--------------------|----------|--------------------|----------|--------------------|----------|--------------------|----------|--------------------|----------|--------------------|----------|
|           |     | rare novel         |          | all                |          | rare novel         |          | all                |          | rare novel         |          | all                |          |
|           |     | N variants in test | p-value  | N variants in test | p-value  | N variants in test | p-value  | N variants in test | p-value  | N variants in test | p-value  | N variants in test | p-value  |
| PRDM11    | 11  | 1                  | 8.60E-02 | 1                  | 8.60E-02 |                    |          |                    |          | 1                  | 6.40E-01 | 1                  | 6.40E-01 |
| OR8K1     | 11  | 1                  | 8.60E-02 | 1                  | 8.60E-02 |                    |          |                    |          | 1                  | 6.40E-01 | 1                  | 6.40E-01 |
| BCL10     | 1   | 2                  | 5.69E-01 | 2                  | 5.69E-01 | 2                  | 6.40E-01 | 2                  | 6.40E-01 |                    |          |                    |          |
| TMEM192   | 4   | 2                  | 5.57E-01 | 2                  | 5.57E-01 | 2                  | 6.40E-01 | 2                  | 6.40E-01 |                    |          |                    |          |
| ECHS1     | 10  | 2                  | 5.71E-01 | 2                  | 5.71E-01 | 2                  | 6.40E-01 | 2                  | 6.40E-01 |                    |          |                    |          |
| EDDM3B    | 14  | 2                  | 5.59E-01 | 2                  | 5.59E-01 | 2                  | 6.40E-01 | 2                  | 6.40E-01 |                    |          |                    |          |
| FRMD8     | 11  | 4                  | 3.26E-01 | 4                  | 3.26E-01 | 2                  | 6.40E-01 | 2                  | 6.40E-01 | 2                  | 6.43E-01 | 2                  | 6.43E-01 |
| DDX1      | 2   | 3                  | 3.42E-01 | 3                  | 3.42E-01 | 3                  | 6.40E-01 | 3                  | 6.40E-01 |                    |          |                    |          |
| PPM1J     | 1   | 2                  | 9.30E-01 | 2                  | 9.30E-01 | 2                  | 6.40E-01 | 2                  | 6.40E-01 | 1                  | 6.65E-01 | 1                  | 6.65E-01 |
| GDPD4     | 11  | 2                  | 5.61E-01 | 2                  | 5.61E-01 | 2                  | 6.40E-01 | 2                  | 6.40E-01 |                    |          |                    |          |
| SPDYC     | 11  | 2                  | 5.74E-01 | 2                  | 5.74E-01 | 2                  | 6.40E-01 | 2                  | 6.40E-01 |                    |          |                    |          |
| HSD17B6   | 12  | 2                  | 1.55E-02 | 2                  | 1.55E-02 |                    |          |                    |          | 2                  | 6.40E-01 | 2                  | 6.40E-01 |
| CHRNA4    | 20  | 5                  | 5.29E-01 | 5                  | 5.29E-01 | 3                  | 7.66E-01 | 3                  | 7.66E-01 | 2                  | 6.40E-01 | 2                  | 6.40E-01 |
| OR52N1    | 11  | 2                  | 5.63E-01 | 2                  | 5.63E-01 | 2                  | 6.40E-01 | 2                  | 6.40E-01 |                    |          |                    |          |
| GIMAP6    | 7   | 2                  | 1.00E+00 | 2                  | 1.00E+00 | 2                  | 6.40E-01 | 2                  | 6.40E-01 | 1                  | 6.59E-01 | 1                  | 6.59E-01 |
| PLD4      | 14  | 2                  | 5.62E-01 | 2                  | 5.62E-01 | 2                  | 6.40E-01 | 2                  | 6.40E-01 |                    |          |                    |          |
| TNFRSF11A | 18  | 1                  | 6.67E-02 | 1                  | 6.67E-02 |                    |          |                    |          | 1                  | 6.41E-01 | 1                  | 6.41E-01 |
| HTR2B     | 2   | 3                  | 6.01E-01 | 3                  | 6.01E-01 | 2                  | 6.42E-01 | 2                  | 6.42E-01 | 1                  | 6.41E-01 | 1                  | 6.41E-01 |
| PSAT1     | 9   | 1                  | 6.67E-02 | 1                  | 6.67E-02 |                    |          |                    |          | 1                  | 6.41E-01 | 1                  | 6.41E-01 |
| TEX10     | 9   | 4                  | 7.64E-01 | 4                  | 7.64E-01 | 3                  | 7.50E-01 | 3                  | 7.50E-01 | 1                  | 6.41E-01 | 1                  | 6.41E-01 |
| SLC37A2   | 11  | 2                  | 5.68E-01 | 2                  | 5.68E-01 | 2                  | 6.41E-01 | 2                  | 6.41E-01 |                    |          |                    |          |
| GRIK1     | 21  | 2                  | 5.78E-01 | 2                  | 5.78E-01 | 2                  | 6.41E-01 | 2                  | 6.41E-01 |                    |          |                    |          |
| DNAJC17   | 15  | 1                  | 7.22E-02 | 1                  | 7.22E-02 |                    |          |                    |          | 1                  | 6.41E-01 | 1                  | 6.41E-01 |
| MAN1A1    | 6   | 3                  | 1.00E+00 | 3                  | 1.00E+00 | 3                  | 7.75E-01 | 3                  | 7.75E-01 | 1                  | 6.41E-01 | 1                  | 6.41E-01 |
| GLOD4     | 17  | 1                  | 7.22E-02 | 1                  | 7.22E-02 |                    |          |                    |          | 1                  | 6.41E-01 | 1                  | 6.41E-01 |
| CPSF2     | 14  | 1                  | 7.22E-02 | 1                  | 7.22E-02 |                    |          |                    |          | 1                  | 6.41E-01 | 1                  | 6.41E-01 |
| PPP1R15B  | 1   | 3                  | 1.00E+00 | 3                  | 1.00E+00 | 3                  | 6.59E-01 | 3                  | 6.59E-01 | 1                  | 6.41E-01 | 1                  | 6.41E-01 |
| EIF2B4    | 2   | 1                  | 7.22E-02 | 1                  | 7.22E-02 |                    |          |                    |          | 1                  | 6.41E-01 | 1                  | 6.41E-01 |
| GOLPH3L   | 1   | 3                  | 4.79E-01 | 3                  | 4.79E-01 | 2                  | 6.46E-01 | 2                  | 6.46E-01 | 1                  | 6.41E-01 | 1                  | 6.41E-01 |
| ISPD      | 7   | 1                  | 7.22E-02 | 1                  | 7.22E-02 |                    |          |                    |          | 1                  | 6.41E-01 | 1                  | 6.41E-01 |
| ASGR1     | 17  | 1                  | 7.22E-02 | 1                  | 7.22E-02 |                    |          |                    |          | 1                  | 6.41E-01 | 1                  | 6.41E-01 |
| HTR1D     | 1   | 2                  | 5.67E-01 | 2                  | 5.67E-01 | 2                  | 6.41E-01 | 2                  | 6.41E-01 |                    |          |                    |          |
| C9orf66   | 9   | 2                  | 1.83E-02 | 2                  | 1.83E-02 |                    |          |                    |          | 2                  | 6.41E-01 | 2                  | 6.41E-01 |
| LGALS3BP  | 17  | 6                  | 6.17E-01 | 6                  | 6.17E-01 | 4                  | 8.50E-01 | 4                  | 8.50E-01 | 2                  | 6.41E-01 | 2                  | 6.41E-01 |
| PPP2R2B   | 5   | 2                  | 1.85E-02 | 2                  | 1.85E-02 |                    |          |                    |          | 2                  | 6.41E-01 | 2                  | 6.41E-01 |
| SRL       | 16  | 2                  | 5.71E-01 | 2                  | 5.71E-01 | 2                  | 6.41E-01 | 2                  | 6.41E-01 |                    |          |                    |          |
| ZNF621    | 3   | 1                  | 1.08E-01 | 1                  | 1.08E-01 |                    |          |                    |          | 1                  | 6.41E-01 | 1                  | 6.41E-01 |
| YIF1A     | 11  | 1                  | 1.08E-01 | 1                  | 1.08E-01 |                    |          |                    |          | 1                  | 6.41E-01 | 1                  | 6.41E-01 |
| TMBIM4    | 12  | 1                  | 1.08E-01 | 1                  | 1.08E-01 |                    |          |                    |          | 1                  | 6.41E-01 | 1                  | 6.41E-01 |
| CDV3      | 3   | 1                  | 1.08E-01 | 1                  | 1.08E-01 |                    |          |                    |          | 1                  | 6.41E-01 | 1                  | 6.41E-01 |
| FBXO48    | 2   | 1                  | 1.08E-01 | 1                  | 1.08E-01 |                    |          |                    |          | 1                  | 6.41E-01 | 1                  | 6.41E-01 |
| ZNF827    | 4   | 5                  | 4.40E-01 | 5                  | 4.40E-01 | 3                  | 7.69E-01 | 3                  | 7.69E-01 | 2                  | 6.41E-01 | 2                  | 6.41E-01 |
| CCDC85C   | 14  | 2                  | 5.70E-01 | 2                  | 5.70E-01 | 2                  | 6.41E-01 | 2                  | 6.41E-01 |                    |          |                    |          |
| AP4M1     | 7   | 3                  | 7.23E-01 | 3                  | 7.23E-01 | 2                  | 6.41E-01 | 2                  | 6.41E-01 | 2                  | 6.46E-01 | 2                  | 6.46E-01 |
| IL24      | 1   | 3                  | 8.02E-01 | 3                  | 8.02E-01 | 2                  | 7.14E-01 | 2                  | 7.14E-01 | 2                  | 6.41E-01 | 2                  | 6.41E-01 |
| TXLNB     | 6   | 5                  | 3.92E-01 | 5                  | 3.92E-01 | 3                  | 7.92E-01 | 3                  | 7.92E-01 | 2                  | 6.41E-01 | 2                  | 6.41E-01 |
| CSTA      | 3   | 2                  | 1.75E-02 | 2                  | 1.75E-02 |                    |          |                    |          | 2                  | 6.41E-01 | 2                  | 6.41E-01 |
| PPP3CC    | 8   | 2                  | 5.63E-01 | 2                  | 5.63E-01 | 2                  | 6.41E-01 | 2                  | 6.41E-01 |                    |          |                    |          |

| SetID   | Chr | ADEH- vs NA        |          |                    |          | ADEH+ vs ADEH-     |          |                    |          | ADEH+ vs NA        |          |                    |          |
|---------|-----|--------------------|----------|--------------------|----------|--------------------|----------|--------------------|----------|--------------------|----------|--------------------|----------|
|         |     | rare novel         |          | all                |          | rare novel         |          | all                |          | rare novel         |          | all                |          |
|         |     | N variants in test | p-value  | N variants in test | p-value  | N variants in test | p-value  | N variants in test | p-value  | N variants in test | p-value  | N variants in test | p-value  |
| KAZN    | 1   | 2                  | 5.53E-01 | 2                  | 5.53E-01 | 2                  | 6.41E-01 | 2                  | 6.41E-01 |                    |          |                    |          |
| PNKP    | 19  | 2                  | 1.93E-02 | 2                  | 1.93E-02 |                    |          |                    |          | 2                  | 6.41E-01 | 2                  | 6.41E-01 |
| PNPLA5  | 22  | 2                  | 1.53E-02 | 2                  | 1.53E-02 |                    |          |                    |          | 2                  | 6.41E-01 | 2                  | 6.41E-01 |
| DHX35   | 20  | 4                  | 8.63E-01 | 4                  | 8.63E-01 | 3                  | 7.65E-01 | 3                  | 7.65E-01 | 2                  | 6.41E-01 | 2                  | 6.41E-01 |
| WNT10B  | 12  | 2                  | 5.79E-01 | 2                  | 5.79E-01 | 2                  | 6.41E-01 | 2                  | 6.41E-01 |                    |          |                    |          |
| APBB1IP | 10  | 2                  | 2.00E-02 | 2                  | 2.00E-02 |                    |          |                    |          | 2                  | 6.41E-01 | 2                  | 6.41E-01 |
| NPFRR2  | 4   | 2                  | 1.81E-02 | 2                  | 1.81E-02 |                    |          |                    |          | 2                  | 6.41E-01 | 2                  | 6.41E-01 |
| CDH7    | 18  | 2                  | 5.85E-01 | 2                  | 5.85E-01 | 2                  | 6.41E-01 | 2                  | 6.41E-01 |                    |          |                    |          |
| IMP4    | 2   | 1                  | 9.15E-02 | 1                  | 9.15E-02 |                    |          |                    |          | 1                  | 6.41E-01 | 1                  | 6.41E-01 |
| ZMYM4   | 1   | 1                  | 9.15E-02 | 1                  | 9.15E-02 |                    |          |                    |          | 1                  | 6.41E-01 | 1                  | 6.41E-01 |
| TMEM104 | 17  | 2                  | 5.58E-01 | 2                  | 5.58E-01 | 2                  | 6.41E-01 | 2                  | 6.41E-01 |                    |          |                    |          |
| ALDOA   | 16  | 1                  | 7.46E-02 | 1                  | 7.46E-02 |                    |          |                    |          | 1                  | 6.41E-01 | 1                  | 6.41E-01 |
| OLFM3   | 1   | 1                  | 7.46E-02 | 1                  | 7.46E-02 |                    |          |                    |          | 1                  | 6.41E-01 | 1                  | 6.41E-01 |
| TYRO3   | 15  | 1                  | 7.46E-02 | 1                  | 7.46E-02 |                    |          |                    |          | 1                  | 6.41E-01 | 1                  | 6.41E-01 |
| C4orf17 | 4   | 1                  | 7.46E-02 | 1                  | 7.46E-02 |                    |          |                    |          | 1                  | 6.41E-01 | 1                  | 6.41E-01 |
| CXCR2   | 2   | 2                  | 6.62E-01 | 2                  | 6.62E-01 | 2                  | 6.42E-01 | 2                  | 6.42E-01 | 2                  | 6.52E-01 | 2                  | 6.52E-01 |
| GLE1    | 9   | 2                  | 5.76E-01 | 2                  | 5.76E-01 | 2                  | 6.42E-01 | 2                  | 6.42E-01 |                    |          |                    |          |
| ETFDH   | 4   | 2                  | 2.20E-02 | 2                  | 2.20E-02 |                    |          |                    |          | 2                  | 6.42E-01 | 2                  | 6.42E-01 |
| TECTB   | 10  | 2                  | 1.94E-02 | 2                  | 1.94E-02 |                    |          |                    |          | 2                  | 6.42E-01 | 2                  | 6.42E-01 |
| ZNF16   | 8   | 2                  | 7.85E-01 | 2                  | 7.85E-01 | 2                  | 6.42E-01 | 2                  | 6.42E-01 | 1                  | 1.00E+00 | 1                  | 1.00E+00 |
| TPPP2   | 14  | 1                  | 5.82E-01 | 2                  | 4.81E-01 | 1                  | 1.00E+00 | 2                  | 1.00E+00 | 1                  | 6.42E-01 | 2                  | 7.77E-01 |
| PHYHD1  | 9   | 2                  | 1.00E+00 | 2                  | 1.00E+00 | 2                  | 7.24E-01 | 2                  | 7.24E-01 | 1                  | 6.42E-01 | 1                  | 6.42E-01 |
| RAB4B   | 19  | 1                  | 6.93E-02 | 1                  | 6.93E-02 |                    |          |                    |          | 1                  | 6.42E-01 | 1                  | 6.42E-01 |
| FBXL7   | 5   | 1                  | 6.93E-02 | 1                  | 6.93E-02 |                    |          |                    |          | 1                  | 6.42E-01 | 1                  | 6.42E-01 |
| CARNMT1 | 9   | 1                  | 6.93E-02 | 1                  | 6.93E-02 |                    |          |                    |          | 1                  | 6.42E-01 | 1                  | 6.42E-01 |
| NLRP7   | 19  | 2                  | 5.60E-01 | 2                  | 5.60E-01 | 2                  | 6.42E-01 | 2                  | 6.42E-01 |                    |          |                    |          |
| FGD3    | 9   | 2                  | 5.69E-01 | 2                  | 5.69E-01 | 2                  | 6.42E-01 | 2                  | 6.42E-01 |                    |          |                    |          |
| ADCY9   | 16  | 2                  | 5.49E-01 | 2                  | 5.49E-01 | 2                  | 6.42E-01 | 2                  | 6.42E-01 |                    |          |                    |          |
| SOAT1   | 1   | 1                  | 7.98E-02 | 1                  | 7.98E-02 |                    |          |                    |          | 1                  | 6.42E-01 | 1                  | 6.42E-01 |
| CNTNAP2 | 7   | 2                  | 1.00E+00 | 2                  | 1.00E+00 | 2                  | 6.88E-01 | 2                  | 6.88E-01 | 1                  | 6.42E-01 | 1                  | 6.42E-01 |
| VRTN    | 14  | 1                  | 7.98E-02 | 1                  | 7.98E-02 |                    |          |                    |          | 1                  | 6.42E-01 | 1                  | 6.42E-01 |
| POLR3C  | 1   | 1                  | 7.98E-02 | 1                  | 7.98E-02 |                    |          |                    |          | 1                  | 6.42E-01 | 1                  | 6.42E-01 |
| TLE4    | 9   | 1                  | 7.98E-02 | 1                  | 7.98E-02 |                    |          |                    |          | 1                  | 6.42E-01 | 1                  | 6.42E-01 |
| ESRRG   | 1   | 1                  | 7.98E-02 | 1                  | 7.98E-02 |                    |          |                    |          | 1                  | 6.42E-01 | 1                  | 6.42E-01 |
| R3HCC1L | 10  | 3                  | 7.00E-01 | 3                  | 7.00E-01 | 2                  | 6.45E-01 | 2                  | 6.45E-01 | 1                  | 6.42E-01 | 1                  | 6.42E-01 |
| LAG3    | 12  | 2                  | 1.79E-02 | 2                  | 1.79E-02 |                    |          |                    |          | 2                  | 6.42E-01 | 2                  | 6.42E-01 |
| HIC2    | 22  | 2                  | 5.79E-01 | 2                  | 5.79E-01 | 2                  | 6.42E-01 | 2                  | 6.42E-01 |                    |          |                    |          |
| GRK7    | 3   | 3                  | 3.08E-01 | 3                  | 3.08E-01 | 3                  | 6.42E-01 | 3                  | 6.42E-01 |                    |          |                    |          |
| CENPQ   | 6   | 2                  | 1.57E-02 | 2                  | 1.57E-02 |                    |          |                    |          | 2                  | 6.42E-01 | 2                  | 6.42E-01 |
| ZDHHC11 | 5   | 1                  | 9.21E-02 | 1                  | 9.21E-02 |                    |          |                    |          | 1                  | 6.42E-01 | 1                  | 6.42E-01 |
| KDELCL1 | 13  | 3                  | 3.27E-01 | 3                  | 3.27E-01 | 3                  | 6.42E-01 | 3                  | 6.42E-01 |                    |          |                    |          |
| OGN     | 9   | 2                  | 9.30E-01 | 2                  | 9.30E-01 | 2                  | 6.42E-01 | 2                  | 6.42E-01 | 1                  | 6.63E-01 | 1                  | 6.63E-01 |
| NUDT12  | 5   | 3                  | 6.61E-01 | 3                  | 6.61E-01 | 2                  | 6.42E-01 | 2                  | 6.42E-01 | 1                  | 6.51E-01 | 1                  | 6.51E-01 |
| DUSP15  | 20  | 1                  | 8.14E-02 | 1                  | 8.14E-02 |                    |          |                    |          | 1                  | 6.42E-01 | 1                  | 6.42E-01 |
| APLP2   | 11  | 2                  | 1.51E-02 | 2                  | 1.51E-02 |                    |          |                    |          | 2                  | 6.42E-01 | 2                  | 6.42E-01 |
| FAXDC2  | 5   | 2                  | 1.66E-02 | 2                  | 1.66E-02 |                    |          |                    |          | 2                  | 6.42E-01 | 2                  | 6.42E-01 |
| NOL11   | 17  | 2                  | 5.75E-01 | 2                  | 5.75E-01 | 2                  | 6.42E-01 | 2                  | 6.42E-01 |                    |          |                    |          |
| TMEM86B | 19  | 2                  | 5.85E-01 | 2                  | 5.85E-01 | 2                  | 6.42E-01 | 2                  | 6.42E-01 |                    |          |                    |          |

| SetID        | Chr | ADEH- vs NA        |          |                    |          | ADEH+ vs ADEH-     |          |                    |          | ADEH+ vs NA        |          |                    |          |
|--------------|-----|--------------------|----------|--------------------|----------|--------------------|----------|--------------------|----------|--------------------|----------|--------------------|----------|
|              |     | rarenovel          |          | all                |          | rarenovel          |          | all                |          | rarenovel          |          | all                |          |
|              |     | N variants in test | p-value  | N variants in test | p-value  | N variants in test | p-value  | N variants in test | p-value  | N variants in test | p-value  | N variants in test | p-value  |
| ADAMTS19     | 5   | 2                  | 1.76E-02 | 2                  | 1.76E-02 |                    |          |                    |          | 2                  | 6.42E-01 | 2                  | 6.42E-01 |
| JAM3         | 11  | 3                  | 6.33E-01 | 3                  | 6.33E-01 | 2                  | 6.42E-01 | 2                  | 6.42E-01 | 1                  | 6.50E-01 | 1                  | 6.50E-01 |
| HEATR5B      | 2   | 2                  | 5.72E-01 | 2                  | 5.72E-01 | 2                  | 6.42E-01 | 2                  | 6.42E-01 |                    |          |                    |          |
| ZFP69B       | 1   | 4                  | 1.00E+00 | 4                  | 1.00E+00 | 4                  | 6.42E-01 | 4                  | 6.42E-01 | 2                  | 6.92E-01 | 2                  | 6.92E-01 |
| DDX23        | 12  | 1                  | 9.28E-02 | 1                  | 9.28E-02 |                    |          |                    |          | 1                  | 6.42E-01 | 1                  | 6.42E-01 |
| LAT          | 16  | 1                  | 9.28E-02 | 1                  | 9.28E-02 |                    |          |                    |          | 1                  | 6.42E-01 | 1                  | 6.42E-01 |
| TXN2         | 22  | 3                  | 7.23E-01 | 3                  | 7.23E-01 | 2                  | 6.57E-01 | 2                  | 6.57E-01 | 1                  | 6.42E-01 | 1                  | 6.42E-01 |
| TRAPP9       | 8   | 3                  | 9.04E-01 | 3                  | 9.04E-01 | 3                  | 6.42E-01 | 3                  | 6.42E-01 | 1                  | 6.98E-01 | 1                  | 6.98E-01 |
| LOC81691     | 16  | 2                  | 1.68E-02 | 2                  | 1.68E-02 |                    |          |                    |          | 2                  | 6.42E-01 | 2                  | 6.42E-01 |
| CTRC         | 1   | 3                  | 8.94E-01 | 3                  | 8.94E-01 | 2                  | 1.00E+00 | 2                  | 1.00E+00 | 2                  | 6.42E-01 | 2                  | 6.42E-01 |
| ZNF804A      | 2   | 5                  | 5.47E-01 | 5                  | 5.47E-01 | 3                  | 7.27E-01 | 3                  | 7.27E-01 | 2                  | 6.43E-01 | 2                  | 6.43E-01 |
| ZNF365       | 10  | 4                  | 8.07E-01 | 4                  | 8.07E-01 | 3                  | 7.88E-01 | 3                  | 7.88E-01 | 2                  | 6.43E-01 | 2                  | 6.43E-01 |
| PXDN         | 2   | 4                  | 8.14E-01 | 4                  | 8.14E-01 | 3                  | 7.69E-01 | 3                  | 7.69E-01 | 2                  | 6.43E-01 | 2                  | 6.43E-01 |
| ENDOD1       | 11  | 2                  | 5.74E-01 | 2                  | 5.74E-01 | 2                  | 6.43E-01 | 2                  | 6.43E-01 |                    |          |                    |          |
| GIMAP1-GIMA  | 7   | 3                  | 8.42E-01 | 3                  | 8.42E-01 | 2                  | 6.66E-01 | 2                  | 6.66E-01 | 2                  | 6.43E-01 | 2                  | 6.43E-01 |
| GIMAP5       | 7   | 3                  | 8.42E-01 | 3                  | 8.42E-01 | 2                  | 6.66E-01 | 2                  | 6.66E-01 | 2                  | 6.43E-01 | 2                  | 6.43E-01 |
| WDHD1        | 14  | 5                  | 9.31E-01 | 6                  | 8.98E-01 | 4                  | 6.69E-01 | 5                  | 7.84E-01 | 2                  | 6.51E-01 | 3                  | 6.43E-01 |
| ZNF502       | 3   | 1                  | 7.07E-02 | 1                  | 7.07E-02 |                    |          |                    |          | 1                  | 6.43E-01 | 1                  | 6.43E-01 |
| LOC101928841 | 13  | 1                  | 7.07E-02 | 1                  | 7.07E-02 |                    |          |                    |          | 1                  | 6.43E-01 | 1                  | 6.43E-01 |
| EMILIN3      | 20  | 2                  | 1.00E+00 | 2                  | 1.00E+00 | 2                  | 7.37E-01 | 2                  | 7.37E-01 | 1                  | 6.43E-01 | 1                  | 6.43E-01 |
| ZNF594       | 17  | 1                  | 7.07E-02 | 1                  | 7.07E-02 |                    |          |                    |          | 1                  | 6.43E-01 | 1                  | 6.43E-01 |
| FAM69A       | 1   | 1                  | 7.07E-02 | 1                  | 7.07E-02 |                    |          |                    |          | 1                  | 6.43E-01 | 1                  | 6.43E-01 |
| LACTB        | 15  | 1                  | 6.07E-01 | 1                  | 6.07E-01 | 1                  | 1.00E+00 | 1                  | 1.00E+00 | 1                  | 6.43E-01 | 1                  | 6.43E-01 |
| MAST4        | 5   | 8                  | 6.11E-01 | 8                  | 6.11E-01 | 5                  | 1.00E+00 | 5                  | 1.00E+00 | 5                  | 6.43E-01 | 5                  | 6.43E-01 |
| MC3R         | 20  | 2                  | 1.84E-02 | 2                  | 1.84E-02 |                    |          |                    |          | 2                  | 6.43E-01 | 2                  | 6.43E-01 |
| C10orf88     | 10  | 2                  | 1.90E-02 | 2                  | 1.90E-02 |                    |          |                    |          | 2                  | 6.43E-01 | 2                  | 6.43E-01 |
| CCDC150      | 2   | 3                  | 8.30E-01 | 3                  | 8.30E-01 | 2                  | 1.00E+00 | 2                  | 1.00E+00 | 2                  | 6.43E-01 | 2                  | 6.43E-01 |
| LETM1        | 4   | 3                  | 3.43E-01 | 3                  | 3.43E-01 | 3                  | 6.43E-01 | 3                  | 6.43E-01 |                    |          |                    |          |
| TFB2M        | 1   | 2                  | 5.67E-01 | 2                  | 5.67E-01 | 2                  | 6.43E-01 | 2                  | 6.43E-01 |                    |          |                    |          |
| FUT1         | 19  | 2                  | 1.75E-02 | 2                  | 1.75E-02 |                    |          |                    |          | 2                  | 6.43E-01 | 2                  | 6.43E-01 |
| MFAP5        | 12  | 2                  | 5.68E-01 | 2                  | 5.68E-01 | 2                  | 6.43E-01 | 2                  | 6.43E-01 |                    |          |                    |          |
| NDUFA7       | 19  | 2                  | 5.74E-01 | 2                  | 5.74E-01 | 2                  | 6.43E-01 | 2                  | 6.43E-01 |                    |          |                    |          |
| MDGA2        | 14  | 1                  | 7.96E-02 | 1                  | 7.96E-02 |                    |          |                    |          | 1                  | 6.43E-01 | 1                  | 6.43E-01 |
| RNF34        | 12  | 1                  | 7.96E-02 | 1                  | 7.96E-02 |                    |          |                    |          | 1                  | 6.43E-01 | 1                  | 6.43E-01 |
| EN2          | 7   | 1                  | 7.96E-02 | 1                  | 7.96E-02 |                    |          |                    |          | 1                  | 6.43E-01 | 1                  | 6.43E-01 |
| ZNF671       | 19  | 2                  | 1.54E-02 | 2                  | 1.54E-02 |                    |          |                    |          | 2                  | 6.43E-01 | 2                  | 6.43E-01 |
| TRMT1L       | 1   | 2                  | 1.80E-02 | 2                  | 1.80E-02 |                    |          |                    |          | 2                  | 6.43E-01 | 2                  | 6.43E-01 |
| CCDC106      | 19  | 1                  | 6.32E-02 | 1                  | 6.32E-02 |                    |          |                    |          | 1                  | 6.43E-01 | 1                  | 6.43E-01 |
| PCDHGB5      | 5   | 1                  | 6.32E-02 | 1                  | 6.32E-02 |                    |          |                    |          | 1                  | 6.43E-01 | 1                  | 6.43E-01 |
| TAOK2        | 16  | 1                  | 6.32E-02 | 1                  | 6.32E-02 |                    |          |                    |          | 1                  | 6.43E-01 | 1                  | 6.43E-01 |
| HACD3        | 15  | 2                  | 5.58E-01 | 2                  | 5.58E-01 | 2                  | 6.43E-01 | 2                  | 6.43E-01 |                    |          |                    |          |
| PRICKLE4     | 6   | 2                  | 1.88E-02 | 2                  | 1.88E-02 |                    |          |                    |          | 2                  | 6.43E-01 | 2                  | 6.43E-01 |
| DNAI1        | 9   | 2                  | 2.05E-02 | 2                  | 2.05E-02 |                    |          |                    |          | 2                  | 6.43E-01 | 2                  | 6.43E-01 |
| SLC22A15     | 1   | 2                  | 5.43E-01 | 2                  | 5.43E-01 | 2                  | 6.44E-01 | 2                  | 6.44E-01 |                    |          |                    |          |
| ABHD11       | 7   | 2                  | 5.62E-01 | 2                  | 5.62E-01 | 2                  | 6.44E-01 | 2                  | 6.44E-01 |                    |          |                    |          |
| NUF2         | 1   | 1                  | 6.93E-02 | 1                  | 6.93E-02 |                    |          |                    |          | 1                  | 6.44E-01 | 1                  | 6.44E-01 |
| ITGA2        | 5   | 2                  | 1.55E-01 | 2                  | 1.55E-01 | 1                  | 1.00E+00 | 1                  | 1.00E+00 | 1                  | 6.44E-01 | 1                  | 6.44E-01 |
| RNF6         | 13  | 1                  | 6.93E-02 | 1                  | 6.93E-02 |                    |          |                    |          | 1                  | 6.44E-01 | 1                  | 6.44E-01 |

| SetID    | Chr | ADEH- vs NA        |          |                    |          | ADEH+ vs ADEH-     |          |                    |          | ADEH+ vs NA        |          |                    |          |
|----------|-----|--------------------|----------|--------------------|----------|--------------------|----------|--------------------|----------|--------------------|----------|--------------------|----------|
|          |     | rarenovel          |          | all                |          | rarenovel          |          | all                |          | rarenovel          |          | all                |          |
|          |     | N variants in test | p-value  | N variants in test | p-value  | N variants in test | p-value  | N variants in test | p-value  | N variants in test | p-value  | N variants in test | p-value  |
| CALR     | 19  | 1                  | 6.93E-02 | 1                  | 6.93E-02 |                    |          |                    |          | 1                  | 6.44E-01 | 1                  | 6.44E-01 |
| NDUFA4L2 | 12  | 1                  | 6.93E-02 | 1                  | 6.93E-02 |                    |          |                    |          | 1                  | 6.44E-01 | 1                  | 6.44E-01 |
| RFFL     | 17  | 1                  | 6.93E-02 | 1                  | 6.93E-02 |                    |          |                    |          | 1                  | 6.44E-01 | 1                  | 6.44E-01 |
| IL6      | 7   | 1                  | 6.93E-02 | 1                  | 6.93E-02 |                    |          |                    |          | 1                  | 6.44E-01 | 1                  | 6.44E-01 |
| CAGE1    | 6   | 2                  | 5.59E-01 | 2                  | 5.59E-01 | 2                  | 6.44E-01 | 2                  | 6.44E-01 |                    |          |                    |          |
| TBRG1    | 11  | 2                  | 5.68E-01 | 2                  | 5.68E-01 | 2                  | 6.44E-01 | 2                  | 6.44E-01 |                    |          |                    |          |
| CYP26A1  | 10  | 1                  | 8.73E-02 | 1                  | 8.73E-02 |                    |          |                    |          | 1                  | 6.44E-01 | 1                  | 6.44E-01 |
| CANX     | 5   | 1                  | 8.73E-02 | 1                  | 8.73E-02 |                    |          |                    |          | 1                  | 6.44E-01 | 1                  | 6.44E-01 |
| PAXIP1   | 7   | 1                  | 7.87E-01 | 1                  | 7.87E-01 | 1                  | 1.00E+00 | 1                  | 1.00E+00 | 1                  | 6.44E-01 | 1                  | 6.44E-01 |
| VSX2     | 14  | 2                  | 5.68E-01 | 2                  | 5.68E-01 | 2                  | 6.44E-01 | 2                  | 6.44E-01 |                    |          |                    |          |
| GIGYF2   | 2   | 2                  | 5.64E-01 | 2                  | 5.64E-01 | 2                  | 6.44E-01 | 2                  | 6.44E-01 |                    |          |                    |          |
| SLC12A9  | 7   | 2                  | 1.47E-02 | 2                  | 1.47E-02 |                    |          |                    |          | 2                  | 6.44E-01 | 2                  | 6.44E-01 |
| SGPP2    | 2   | 2                  | 5.43E-01 | 2                  | 5.43E-01 | 2                  | 6.44E-01 | 2                  | 6.44E-01 |                    |          |                    |          |
| PCSK1    | 5   | 2                  | 1.94E-02 | 2                  | 1.94E-02 |                    |          |                    |          | 2                  | 6.44E-01 | 2                  | 6.44E-01 |
| BLM      | 15  | 3                  | 6.74E-01 | 3                  | 6.74E-01 | 2                  | 6.44E-01 | 2                  | 6.44E-01 | 2                  | 6.44E-01 | 2                  | 6.44E-01 |
| WWC2     | 4   | 5                  | 7.74E-01 | 6                  | 8.81E-01 | 4                  | 8.59E-01 | 5                  | 8.69E-01 | 1                  | 6.44E-01 | 2                  | 8.56E-01 |
| KIAA1586 | 6   | 1                  | 6.80E-02 | 1                  | 6.80E-02 |                    |          |                    |          | 1                  | 6.44E-01 | 1                  | 6.44E-01 |
| METTL5   | 2   | 1                  | 6.80E-02 | 1                  | 6.80E-02 |                    |          |                    |          | 1                  | 6.44E-01 | 1                  | 6.44E-01 |
| FRMD4A   | 10  | 2                  | 9.28E-01 | 2                  | 9.28E-01 | 2                  | 6.53E-01 | 2                  | 6.53E-01 | 1                  | 6.44E-01 | 1                  | 6.44E-01 |
| GHITM    | 10  | 1                  | 7.61E-01 | 1                  | 7.61E-01 | 1                  | 1.00E+00 | 1                  | 1.00E+00 | 1                  | 6.44E-01 | 1                  | 6.44E-01 |
| CD9      | 12  | 1                  | 6.80E-02 | 1                  | 6.80E-02 |                    |          |                    |          | 1                  | 6.44E-01 | 1                  | 6.44E-01 |
| CPA5     | 7   | 4                  | 3.67E-01 | 4                  | 3.67E-01 | 2                  | 6.50E-01 | 2                  | 6.50E-01 | 2                  | 6.44E-01 | 2                  | 6.44E-01 |
| IFNK     | 9   | 1                  | 7.42E-02 | 1                  | 7.42E-02 |                    |          |                    |          | 1                  | 6.44E-01 | 1                  | 6.44E-01 |
| GPC6     | 13  | 1                  | 7.42E-02 | 1                  | 7.42E-02 |                    |          |                    |          | 1                  | 6.44E-01 | 1                  | 6.44E-01 |
| IFT27    | 22  | 1                  | 7.42E-02 | 1                  | 7.42E-02 |                    |          |                    |          | 1                  | 6.44E-01 | 1                  | 6.44E-01 |
| KCTD15   | 19  | 1                  | 7.42E-02 | 1                  | 7.42E-02 |                    |          |                    |          | 1                  | 6.44E-01 | 1                  | 6.44E-01 |
| MED16    | 19  | 5                  | 4.70E-01 | 5                  | 4.70E-01 | 3                  | 6.44E-01 | 3                  | 6.44E-01 | 2                  | 6.45E-01 | 2                  | 6.45E-01 |
| ZNF76    | 6   | 3                  | 3.29E-01 | 3                  | 3.29E-01 | 3                  | 6.44E-01 | 3                  | 6.44E-01 |                    |          |                    |          |
| LINS1    | 15  | 1                  | 6.87E-02 | 1                  | 6.87E-02 |                    |          |                    |          | 1                  | 6.44E-01 | 1                  | 6.44E-01 |
| ATP6V1C2 | 2   | 1                  | 6.87E-02 | 1                  | 6.87E-02 |                    |          |                    |          | 1                  | 6.44E-01 | 1                  | 6.44E-01 |
| ZDHHC7   | 16  | 1                  | 6.87E-02 | 1                  | 6.87E-02 |                    |          |                    |          | 1                  | 6.44E-01 | 1                  | 6.44E-01 |
| GPR150   | 5   | 2                  | 5.87E-01 | 2                  | 5.87E-01 | 2                  | 6.44E-01 | 2                  | 6.44E-01 |                    |          |                    |          |
| EXOC6B   | 2   | 2                  | 1.81E-02 | 2                  | 1.81E-02 |                    |          |                    |          | 2                  | 6.44E-01 | 2                  | 6.44E-01 |
| NSMCE3   | 15  | 3                  | 3.35E-01 | 3                  | 3.35E-01 | 3                  | 6.44E-01 | 3                  | 6.44E-01 |                    |          |                    |          |
| ZNFX1    | 20  | 4                  | 8.15E-01 | 4                  | 8.15E-01 | 3                  | 7.76E-01 | 3                  | 7.76E-01 | 2                  | 6.44E-01 | 2                  | 6.44E-01 |
| C1orf131 | 1   | 2                  | 5.71E-01 | 3                  | 1.69E-01 | 2                  | 6.44E-01 | 3                  | 6.53E-01 |                    |          | 1                  | 8.67E-01 |
| GRM3     | 7   | 2                  | 5.68E-01 | 2                  | 5.68E-01 | 2                  | 6.44E-01 | 2                  | 6.44E-01 |                    |          |                    |          |
| LBR      | 1   | 4                  | 8.39E-01 | 4                  | 8.39E-01 | 3                  | 7.81E-01 | 3                  | 7.81E-01 | 2                  | 6.44E-01 | 2                  | 6.44E-01 |
| ACPT     | 19  | 2                  | 1.60E-02 | 2                  | 1.60E-02 |                    |          |                    |          | 2                  | 6.44E-01 | 2                  | 6.44E-01 |
| FKBP3    | 14  | 1                  | 6.97E-02 | 1                  | 6.97E-02 |                    |          |                    |          | 1                  | 6.44E-01 | 1                  | 6.44E-01 |
| SAPCD2   | 9   | 1                  | 6.97E-02 | 1                  | 6.97E-02 |                    |          |                    |          | 1                  | 6.44E-01 | 1                  | 6.44E-01 |
| SLFN5    | 17  | 3                  | 1.00E+00 | 4                  | 1.00E+00 | 3                  | 7.53E-01 | 4                  | 7.53E-01 | 1                  | 6.44E-01 | 2                  | 6.45E-01 |
| SLC25A2  | 5   | 2                  | 1.60E-02 | 2                  | 1.60E-02 |                    |          |                    |          | 2                  | 6.45E-01 | 2                  | 6.45E-01 |
| EIF2B5   | 3   | 1                  | 7.33E-02 | 1                  | 7.33E-02 |                    |          |                    |          | 1                  | 6.45E-01 | 1                  | 6.45E-01 |
| FAM161B  | 14  | 1                  | 7.33E-02 | 1                  | 7.33E-02 |                    |          |                    |          | 1                  | 6.45E-01 | 1                  | 6.45E-01 |
| CAPNS2   | 16  | 3                  | 5.98E-01 | 3                  | 5.98E-01 | 3                  | 8.44E-01 | 3                  | 8.44E-01 | 1                  | 6.45E-01 | 1                  | 6.45E-01 |
| CCDC92   | 12  | 4                  | 7.95E-01 | 5                  | 7.95E-01 | 3                  | 8.18E-01 | 4                  | 8.17E-01 | 1                  | 6.45E-01 | 2                  | 6.45E-01 |
| LCA5     | 6   | 4                  | 8.54E-01 | 4                  | 8.54E-01 | 3                  | 6.89E-01 | 3                  | 6.89E-01 | 2                  | 6.45E-01 | 2                  | 6.45E-01 |

| SetID    | Chr | ADEH- vs NA        |          |                    |          | ADEH+ vs ADEH-     |          |                    |          | ADEH+ vs NA        |          |                    |          |
|----------|-----|--------------------|----------|--------------------|----------|--------------------|----------|--------------------|----------|--------------------|----------|--------------------|----------|
|          |     | rare novel         |          | all                |          | rare novel         |          | all                |          | rare novel         |          | all                |          |
|          |     | N variants in test | p-value  | N variants in test | p-value  | N variants in test | p-value  | N variants in test | p-value  | N variants in test | p-value  | N variants in test | p-value  |
| DLGAP3   | 1   | 3                  | 3.45E-01 | 3                  | 3.45E-01 | 3                  | 6.45E-01 | 3                  | 6.45E-01 |                    |          |                    |          |
| OR4K13   | 14  | 3                  | 4.82E-01 | 3                  | 4.82E-01 | 2                  | 7.15E-01 | 2                  | 7.15E-01 | 1                  | 6.45E-01 | 1                  | 6.45E-01 |
| ZIC1     | 3   | 1                  | 7.05E-02 | 1                  | 7.05E-02 |                    |          |                    |          | 1                  | 6.45E-01 | 1                  | 6.45E-01 |
| GPR52    | 1   | 3                  | 6.08E-01 | 3                  | 6.08E-01 | 2                  | 6.45E-01 | 2                  | 6.45E-01 | 1                  | 6.80E-01 | 1                  | 6.80E-01 |
| ATXN2L   | 16  | 4                  | 8.86E-01 | 4                  | 8.86E-01 | 4                  | 6.45E-01 | 4                  | 6.45E-01 | 1                  | 6.58E-01 | 1                  | 6.58E-01 |
| PIBF1    | 13  | 4                  | 8.25E-01 | 4                  | 8.25E-01 | 3                  | 6.77E-01 | 3                  | 6.77E-01 | 2                  | 6.45E-01 | 2                  | 6.45E-01 |
| CORIN    | 4   | 5                  | 5.50E-01 | 5                  | 5.50E-01 | 3                  | 6.55E-01 | 3                  | 6.55E-01 | 2                  | 6.45E-01 | 2                  | 6.45E-01 |
| GPR182   | 12  | 2                  | 5.69E-01 | 2                  | 5.69E-01 | 2                  | 6.45E-01 | 2                  | 6.45E-01 |                    |          |                    |          |
| YIPF2    | 19  | 2                  | 5.67E-01 | 2                  | 5.67E-01 | 2                  | 6.45E-01 | 2                  | 6.45E-01 |                    |          |                    |          |
| LRIF1    | 1   | 2                  | 5.68E-01 | 2                  | 5.68E-01 | 2                  | 6.45E-01 | 2                  | 6.45E-01 |                    |          |                    |          |
| OVGP1    | 1   | 2                  | 1.63E-02 | 2                  | 1.63E-02 |                    |          |                    |          | 2                  | 6.45E-01 | 2                  | 6.45E-01 |
| ARHGEF19 | 1   | 3                  | 7.93E-01 | 4                  | 8.81E-01 | 2                  | 1.00E+00 | 3                  | 1.00E+00 | 2                  | 6.45E-01 | 3                  | 6.90E-01 |
| HRH1     | 3   | 2                  | 5.44E-01 | 2                  | 5.44E-01 | 2                  | 6.45E-01 | 2                  | 6.45E-01 |                    |          |                    |          |
| OPRL1    | 20  | 2                  | 7.37E-01 | 2                  | 7.37E-01 | 2                  | 6.45E-01 | 2                  | 6.45E-01 | 1                  | 7.02E-01 | 1                  | 7.02E-01 |
| CSMD2    | 1   | 15                 | 5.75E-01 | 15                 | 5.75E-01 | 12                 | 1.00E+00 | 12                 | 1.00E+00 | 6                  | 6.45E-01 | 6                  | 6.45E-01 |
| PROCA1   | 17  | 2                  | 5.69E-01 | 2                  | 5.69E-01 | 2                  | 6.45E-01 | 2                  | 6.45E-01 |                    |          |                    |          |
| DAPK2    | 15  | 1                  | 7.75E-02 | 1                  | 7.75E-02 |                    |          |                    |          | 1                  | 6.45E-01 | 1                  | 6.45E-01 |
| GSC2     | 22  | 1                  | 7.75E-02 | 1                  | 7.75E-02 |                    |          |                    |          | 1                  | 6.45E-01 | 1                  | 6.45E-01 |
| APOBEC3G | 22  | 1                  | 7.75E-02 | 1                  | 7.75E-02 |                    |          |                    |          | 1                  | 6.45E-01 | 1                  | 6.45E-01 |
| ARHGEF12 | 11  | 2                  | 1.78E-02 | 2                  | 1.78E-02 |                    |          |                    |          | 2                  | 6.45E-01 | 2                  | 6.45E-01 |
| ROBO2    | 3   | 2                  | 5.70E-01 | 2                  | 5.70E-01 | 2                  | 6.45E-01 | 2                  | 6.45E-01 |                    |          |                    |          |
| CP       | 3   | 7                  | 6.41E-01 | 7                  | 6.41E-01 | 7                  | 7.38E-01 | 7                  | 7.38E-01 | 4                  | 6.45E-01 | 4                  | 6.45E-01 |
| RTCB     | 22  | 1                  | 5.64E-02 | 1                  | 5.64E-02 |                    |          |                    |          | 1                  | 6.45E-01 | 1                  | 6.45E-01 |
| TMPRSS2  | 21  | 1                  | 5.64E-02 | 1                  | 5.64E-02 |                    |          |                    |          | 1                  | 6.45E-01 | 1                  | 6.45E-01 |
| FAM107B  | 10  | 1                  | 5.64E-02 | 1                  | 5.64E-02 |                    |          |                    |          | 1                  | 6.45E-01 | 1                  | 6.45E-01 |
| ZC3HC1   | 7   | 4                  | 7.23E-01 | 5                  | 7.23E-01 | 3                  | 7.64E-01 | 4                  | 7.64E-01 | 1                  | 6.45E-01 | 2                  | 6.46E-01 |
| ATP6V1E2 | 2   | 2                  | 1.00E+00 | 2                  | 1.00E+00 | 2                  | 7.07E-01 | 2                  | 7.07E-01 | 1                  | 6.45E-01 | 1                  | 6.45E-01 |
| ZNF713   | 7   | 1                  | 5.64E-02 | 1                  | 5.64E-02 |                    |          |                    |          | 1                  | 6.45E-01 | 1                  | 6.45E-01 |
| CHUK     | 10  | 1                  | 5.64E-02 | 1                  | 5.64E-02 |                    |          |                    |          | 1                  | 6.45E-01 | 1                  | 6.45E-01 |
| CADPS    | 3   | 1                  | 5.64E-02 | 1                  | 5.64E-02 |                    |          |                    |          | 1                  | 6.45E-01 | 1                  | 6.45E-01 |
| FAM151B  | 5   | 2                  | 1.89E-02 | 2                  | 1.89E-02 |                    |          |                    |          | 2                  | 6.45E-01 | 2                  | 6.45E-01 |
| PDS5A    | 4   | 2                  | 5.72E-01 | 2                  | 5.72E-01 | 2                  | 6.45E-01 | 2                  | 6.45E-01 |                    |          |                    |          |
| GEMIN2   | 14  | 2                  | 1.80E-02 | 2                  | 1.80E-02 |                    |          |                    |          | 2                  | 6.45E-01 | 2                  | 6.45E-01 |
| KLK10    | 19  | 3                  | 2.36E-01 | 3                  | 2.36E-01 | 3                  | 6.46E-01 | 3                  | 6.46E-01 |                    |          |                    |          |
| SULF1    | 8   | 3                  | 6.91E-01 | 3                  | 6.91E-01 | 2                  | 7.20E-01 | 2                  | 7.20E-01 | 2                  | 6.46E-01 | 2                  | 6.46E-01 |
| USP24    | 1   | 3                  | 7.10E-01 | 3                  | 7.10E-01 | 2                  | 6.46E-01 | 2                  | 6.46E-01 | 1                  | 6.48E-01 | 1                  | 6.48E-01 |
| FAM98A   | 2   | 1                  | 8.32E-02 | 1                  | 8.32E-02 |                    |          |                    |          | 1                  | 6.46E-01 | 1                  | 6.46E-01 |
| DNMT1    | 19  | 1                  | 8.32E-02 | 1                  | 8.32E-02 |                    |          |                    |          | 1                  | 6.46E-01 | 1                  | 6.46E-01 |
| PIWIL2   | 8   | 1                  | 8.32E-02 | 1                  | 8.32E-02 |                    |          |                    |          | 1                  | 6.46E-01 | 1                  | 6.46E-01 |
| DICER1   | 14  | 4                  | 8.49E-01 | 4                  | 8.49E-01 | 3                  | 7.33E-01 | 3                  | 7.33E-01 | 2                  | 6.46E-01 | 2                  | 6.46E-01 |
| RAB15    | 14  | 1                  | 8.42E-01 | 1                  | 8.42E-01 | 1                  | 1.00E+00 | 1                  | 1.00E+00 | 1                  | 6.46E-01 | 1                  | 6.46E-01 |
| LRRRC70  | 5   | 2                  | 8.37E-01 | 2                  | 8.37E-01 | 2                  | 6.46E-01 | 2                  | 6.46E-01 | 1                  | 1.00E+00 | 1                  | 1.00E+00 |
| ITGAL    | 16  | 1                  | 7.74E-02 | 1                  | 7.74E-02 |                    |          |                    |          | 1                  | 6.46E-01 | 1                  | 6.46E-01 |
| FUT11    | 10  | 1                  | 7.74E-02 | 1                  | 7.74E-02 |                    |          |                    |          | 1                  | 6.46E-01 | 1                  | 6.46E-01 |
| SLC25A35 | 17  | 1                  | 7.74E-02 | 1                  | 7.74E-02 |                    |          |                    |          | 1                  | 6.46E-01 | 1                  | 6.46E-01 |
| FAM168A  | 11  | 1                  | 7.74E-02 | 1                  | 7.74E-02 |                    |          |                    |          | 1                  | 6.46E-01 | 1                  | 6.46E-01 |
| CPT1A    | 11  | 1                  | 7.74E-02 | 1                  | 7.74E-02 |                    |          |                    |          | 1                  | 6.46E-01 | 1                  | 6.46E-01 |
| SLC45A1  | 1   | 2                  | 5.74E-01 | 2                  | 5.74E-01 | 2                  | 6.46E-01 | 2                  | 6.46E-01 |                    |          |                    |          |

| SetID     | Chr | ADEH- vs NA        |          |                    |          | ADEH+ vs ADEH-     |          |                    |          | ADEH+ vs NA        |          |                    |          |
|-----------|-----|--------------------|----------|--------------------|----------|--------------------|----------|--------------------|----------|--------------------|----------|--------------------|----------|
|           |     | rarenovel          |          | all                |          | rarenovel          |          | all                |          | rarenovel          |          | all                |          |
|           |     | N variants in test | p-value  | N variants in test | p-value  | N variants in test | p-value  | N variants in test | p-value  | N variants in test | p-value  | N variants in test | p-value  |
| PFKM      | 12  | 2                  | 1.65E-02 | 2                  | 1.65E-02 |                    |          |                    |          | 2                  | 6.46E-01 | 2                  | 6.46E-01 |
| NTN5      | 19  | 4                  | 6.44E-02 | 4                  | 6.44E-02 | 3                  | 1.00E+00 | 3                  | 1.00E+00 | 3                  | 6.46E-01 | 3                  | 6.46E-01 |
| CAMTA1    | 1   | 2                  | 5.75E-01 | 2                  | 5.75E-01 | 2                  | 6.46E-01 | 2                  | 6.46E-01 |                    |          |                    |          |
| SGSH      | 17  | 1                  | 6.83E-02 | 1                  | 6.83E-02 |                    |          |                    |          | 1                  | 6.46E-01 | 1                  | 6.46E-01 |
| OR4E2     | 14  | 1                  | 6.83E-02 | 1                  | 6.83E-02 |                    |          |                    |          | 1                  | 6.46E-01 | 1                  | 6.46E-01 |
| ITPR2     | 12  | 4                  | 7.85E-01 | 4                  | 7.85E-01 | 3                  | 7.56E-01 | 3                  | 7.56E-01 | 1                  | 6.46E-01 | 1                  | 6.46E-01 |
| PEX1      | 7   | 4                  | 7.88E-01 | 4                  | 7.88E-01 | 3                  | 7.87E-01 | 3                  | 7.87E-01 | 1                  | 6.46E-01 | 1                  | 6.46E-01 |
| USP37     | 2   | 1                  | 6.83E-02 | 1                  | 6.83E-02 |                    |          |                    |          | 1                  | 6.46E-01 | 1                  | 6.46E-01 |
| THOC1     | 18  | 1                  | 6.83E-02 | 1                  | 6.83E-02 |                    |          |                    |          | 1                  | 6.46E-01 | 1                  | 6.46E-01 |
| PTGDR2    | 11  | 1                  | 6.83E-02 | 1                  | 6.83E-02 |                    |          |                    |          | 1                  | 6.46E-01 | 1                  | 6.46E-01 |
| PARD3     | 10  | 2                  | 5.81E-01 | 2                  | 5.81E-01 | 2                  | 6.46E-01 | 2                  | 6.46E-01 |                    |          |                    |          |
| EXT2      | 11  | 4                  | 9.07E-01 | 4                  | 9.07E-01 | 3                  | 8.31E-01 | 3                  | 8.31E-01 | 2                  | 6.46E-01 | 2                  | 6.46E-01 |
| ZFP64     | 20  | 2                  | 1.75E-02 | 2                  | 1.75E-02 |                    |          |                    |          | 2                  | 6.47E-01 | 2                  | 6.47E-01 |
| ANKRA2    | 5   | 2                  | 2.09E-02 | 2                  | 2.09E-02 |                    |          |                    |          | 2                  | 6.47E-01 | 2                  | 6.47E-01 |
| DHX33     | 17  | 3                  | 1.00E+00 | 3                  | 1.00E+00 | 3                  | 6.47E-01 | 3                  | 6.47E-01 | 2                  | 7.28E-01 | 2                  | 7.28E-01 |
| ACSBG1    | 15  | 2                  | 2.47E-02 | 2                  | 2.47E-02 |                    |          |                    |          | 2                  | 6.47E-01 | 2                  | 6.47E-01 |
| CPN1      | 10  | 2                  | 5.67E-01 | 2                  | 5.67E-01 | 2                  | 6.47E-01 | 2                  | 6.47E-01 |                    |          |                    |          |
| ADCY8     | 8   | 3                  | 3.52E-01 | 3                  | 3.52E-01 | 3                  | 6.47E-01 | 3                  | 6.47E-01 |                    |          |                    |          |
| CASS4     | 20  | 1                  | 5.90E-02 | 1                  | 5.90E-02 |                    |          |                    |          | 1                  | 6.47E-01 | 1                  | 6.47E-01 |
| ATL2      | 2   | 2                  | 5.90E-02 | 2                  | 5.90E-02 |                    |          |                    |          | 2                  | 6.47E-01 | 2                  | 6.47E-01 |
| C8G       | 9   | 1                  | 5.90E-02 | 1                  | 5.90E-02 |                    |          |                    |          | 1                  | 6.47E-01 | 1                  | 6.47E-01 |
| OAS1      | 12  | 4                  | 7.45E-01 | 4                  | 7.45E-01 | 3                  | 6.51E-01 | 3                  | 6.51E-01 | 1                  | 6.47E-01 | 1                  | 6.47E-01 |
| VEGFB     | 11  | 1                  | 5.90E-02 | 1                  | 5.90E-02 |                    |          |                    |          | 1                  | 6.47E-01 | 1                  | 6.47E-01 |
| PM20D2    | 6   | 1                  | 6.97E-02 | 1                  | 6.97E-02 |                    |          |                    |          | 1                  | 6.47E-01 | 1                  | 6.47E-01 |
| IFI44     | 1   | 1                  | 6.97E-02 | 1                  | 6.97E-02 |                    |          |                    |          | 1                  | 6.47E-01 | 1                  | 6.47E-01 |
| CD200R1L  | 3   | 2                  | 1.00E+00 | 2                  | 1.00E+00 | 2                  | 7.12E-01 | 2                  | 7.12E-01 | 1                  | 6.47E-01 | 1                  | 6.47E-01 |
| CRAT      | 9   | 3                  | 4.61E-01 | 3                  | 4.61E-01 | 2                  | 6.66E-01 | 2                  | 6.66E-01 | 1                  | 6.47E-01 | 1                  | 6.47E-01 |
| HIST1H2AD | 6   | 2                  | 5.65E-01 | 2                  | 5.65E-01 | 2                  | 6.47E-01 | 2                  | 6.47E-01 |                    |          |                    |          |
| FAM175B   | 10  | 2                  | 5.68E-01 | 2                  | 5.68E-01 | 2                  | 6.47E-01 | 2                  | 6.47E-01 |                    |          |                    |          |
| CDK20     | 9   | 2                  | 1.00E+00 | 2                  | 1.00E+00 | 2                  | 6.67E-01 | 2                  | 6.67E-01 | 1                  | 6.47E-01 | 1                  | 6.47E-01 |
| TRPS1     | 8   | 3                  | 6.94E-01 | 3                  | 6.94E-01 | 2                  | 6.49E-01 | 2                  | 6.49E-01 | 1                  | 6.47E-01 | 1                  | 6.47E-01 |
| FXN       | 9   | 1                  | 8.44E-02 | 1                  | 8.44E-02 |                    |          |                    |          | 1                  | 6.47E-01 | 1                  | 6.47E-01 |
| ATCAY     | 19  | 1                  | 8.44E-02 | 1                  | 8.44E-02 |                    |          |                    |          | 1                  | 6.47E-01 | 1                  | 6.47E-01 |
| MED27     | 9   | 1                  | 8.44E-02 | 1                  | 8.44E-02 |                    |          |                    |          | 1                  | 6.47E-01 | 1                  | 6.47E-01 |
| LRTOMT    | 11  | 2                  | 1.72E-02 | 2                  | 1.72E-02 |                    |          |                    |          | 2                  | 6.47E-01 | 2                  | 6.47E-01 |
| NPR2      | 9   | 5                  | 5.57E-01 | 5                  | 5.57E-01 | 3                  | 7.91E-01 | 3                  | 7.91E-01 | 2                  | 6.47E-01 | 2                  | 6.47E-01 |
| PDZRN3    | 3   | 3                  | 8.47E-01 | 3                  | 8.47E-01 | 2                  | 6.84E-01 | 2                  | 6.84E-01 | 2                  | 6.47E-01 | 2                  | 6.47E-01 |
| ADAMTS2   | 5   | 2                  | 1.45E-02 | 2                  | 1.45E-02 |                    |          |                    |          | 2                  | 6.47E-01 | 2                  | 6.47E-01 |
| FAM213A   | 10  | 2                  | 5.62E-01 | 2                  | 5.62E-01 | 2                  | 6.48E-01 | 2                  | 6.48E-01 |                    |          |                    |          |
| YEATS2    | 3   | 1                  | 8.32E-02 | 1                  | 8.32E-02 |                    |          |                    |          | 1                  | 6.48E-01 | 1                  | 6.48E-01 |
| DERL3     | 22  | 1                  | 8.32E-02 | 1                  | 8.32E-02 |                    |          |                    |          | 1                  | 6.48E-01 | 1                  | 6.48E-01 |
| FAM196B   | 5   | 1                  | 8.32E-02 | 1                  | 8.32E-02 |                    |          |                    |          | 1                  | 6.48E-01 | 1                  | 6.48E-01 |
| ZNF510    | 9   | 4                  | 8.42E-01 | 4                  | 8.42E-01 | 3                  | 7.83E-01 | 3                  | 7.83E-01 | 1                  | 6.48E-01 | 1                  | 6.48E-01 |
| WNT2B     | 1   | 1                  | 8.32E-02 | 1                  | 8.32E-02 |                    |          |                    |          | 1                  | 6.48E-01 | 1                  | 6.48E-01 |
| NEXN      | 1   | 4                  | 8.37E-01 | 5                  | 8.36E-01 | 3                  | 8.21E-01 | 4                  | 8.27E-01 | 1                  | 6.48E-01 | 2                  | 6.94E-01 |
| PPP1R3E   | 14  | 1                  | 8.32E-02 | 1                  | 8.32E-02 |                    |          |                    |          | 1                  | 6.48E-01 | 1                  | 6.48E-01 |
| SLC2A1    | 1   | 1                  | 8.32E-02 | 1                  | 8.32E-02 |                    |          |                    |          | 1                  | 6.48E-01 | 1                  | 6.48E-01 |
| CREB5     | 7   | 1                  | 8.32E-02 | 1                  | 8.32E-02 |                    |          |                    |          | 1                  | 6.48E-01 | 1                  | 6.48E-01 |



| SetID    | Chr | ADEH- vs NA        |          |                    |          | ADEH+ vs ADEH-     |          |                    |          | ADEH+ vs NA        |          |                    |          |
|----------|-----|--------------------|----------|--------------------|----------|--------------------|----------|--------------------|----------|--------------------|----------|--------------------|----------|
|          |     | rare novel         |          | all                |          | rare novel         |          | all                |          | rare novel         |          | all                |          |
|          |     | N variants in test | p-value  | N variants in test | p-value  | N variants in test | p-value  | N variants in test | p-value  | N variants in test | p-value  | N variants in test | p-value  |
| AZI2     | 3   | 1                  | 8.32E-02 | 1                  | 8.32E-02 |                    |          |                    |          | 1                  | 6.48E-01 | 1                  | 6.48E-01 |
| MYF5     | 12  | 1                  | 8.32E-02 | 1                  | 8.32E-02 |                    |          |                    |          | 1                  | 6.48E-01 | 1                  | 6.48E-01 |
| PPM1G    | 2   | 1                  | 8.32E-02 | 1                  | 8.32E-02 |                    |          |                    |          | 1                  | 6.48E-01 | 1                  | 6.48E-01 |
| NAA35    | 9   | 2                  | 1.00E+00 | 2                  | 1.00E+00 | 2                  | 7.72E-01 | 2                  | 7.72E-01 | 2                  | 6.48E-01 | 2                  | 6.48E-01 |
| NSMCE2   | 8   | 2                  | 5.64E-01 | 2                  | 5.64E-01 | 2                  | 6.48E-01 | 2                  | 6.48E-01 |                    |          |                    |          |
| CFD      | 19  | 2                  | 5.56E-01 | 2                  | 5.56E-01 | 2                  | 6.48E-01 | 2                  | 6.48E-01 |                    |          |                    |          |
| PINK1    | 1   | 2                  | 1.87E-02 | 2                  | 1.87E-02 |                    |          |                    |          | 2                  | 6.48E-01 | 2                  | 6.48E-01 |
| GRIN3B   | 19  | 10                 | 4.82E-01 | 11                 | 4.83E-01 | 7                  | 1.00E+00 | 8                  | 1.00E+00 | 4                  | 6.52E-01 | 5                  | 6.48E-01 |
| ZBTB38   | 3   | 2                  | 1.68E-02 | 2                  | 1.68E-02 |                    |          |                    |          | 2                  | 6.48E-01 | 2                  | 6.48E-01 |
| OS9      | 12  | 2                  | 1.00E+00 | 2                  | 1.00E+00 | 2                  | 6.48E-01 | 2                  | 6.48E-01 | 1                  | 6.56E-01 | 1                  | 6.56E-01 |
| BIN1     | 2   | 2                  | 5.62E-01 | 2                  | 5.62E-01 | 2                  | 6.48E-01 | 2                  | 6.48E-01 |                    |          |                    |          |
| C1orf74  | 1   | 3                  | 2.21E-01 | 3                  | 2.21E-01 | 3                  | 6.48E-01 | 3                  | 6.48E-01 |                    |          |                    |          |
| USP39    | 2   | 2                  | 5.74E-01 | 2                  | 5.74E-01 | 2                  | 6.48E-01 | 2                  | 6.48E-01 |                    |          |                    |          |
| ULK2     | 17  | 4                  | 7.28E-01 | 4                  | 7.28E-01 | 3                  | 8.14E-01 | 3                  | 8.14E-01 | 2                  | 6.48E-01 | 2                  | 6.48E-01 |
| PAPD5    | 16  | 2                  | 5.68E-01 | 2                  | 5.68E-01 | 2                  | 6.48E-01 | 2                  | 6.48E-01 |                    |          |                    |          |
| FAP      | 2   | 2                  | 4.79E-01 | 2                  | 4.79E-01 | 2                  | 6.48E-01 | 2                  | 6.48E-01 | 2                  | 7.27E-01 | 2                  | 7.27E-01 |
| PAX2     | 10  | 2                  | 5.63E-01 | 2                  | 5.63E-01 | 2                  | 6.49E-01 | 2                  | 6.49E-01 |                    |          |                    |          |
| ADGRL3   | 4   | 2                  | 5.72E-01 | 2                  | 5.72E-01 | 2                  | 6.49E-01 | 2                  | 6.49E-01 |                    |          |                    |          |
| CLIP3    | 19  | 3                  | 7.07E-01 | 3                  | 7.07E-01 | 2                  | 6.49E-01 | 2                  | 6.49E-01 | 1                  | 6.65E-01 | 1                  | 6.65E-01 |
| YTHDC2   | 5   | 2                  | 3.00E-01 | 2                  | 3.00E-01 | 2                  | 6.49E-01 | 2                  | 6.49E-01 |                    |          |                    |          |
| APCDD1L  | 20  | 2                  | 5.61E-01 | 2                  | 5.61E-01 | 2                  | 6.49E-01 | 2                  | 6.49E-01 |                    |          |                    |          |
| NAB1     | 2   | 1                  | 7.17E-02 | 1                  | 7.17E-02 |                    |          |                    |          | 1                  | 6.49E-01 | 1                  | 6.49E-01 |
| MACC1    | 7   | 3                  | 5.53E-01 | 4                  | 5.53E-01 | 3                  | 1.00E+00 | 4                  | 1.00E+00 | 1                  | 6.49E-01 | 2                  | 6.49E-01 |
| KLK6     | 19  | 1                  | 7.17E-02 | 1                  | 7.17E-02 |                    |          |                    |          | 1                  | 6.49E-01 | 1                  | 6.49E-01 |
| KIAA1671 | 22  | 2                  | 5.80E-01 | 2                  | 5.80E-01 | 2                  | 6.49E-01 | 2                  | 6.49E-01 |                    |          |                    |          |
| FOXO3    | 6   | 2                  | 5.68E-01 | 2                  | 5.68E-01 | 2                  | 6.49E-01 | 2                  | 6.49E-01 |                    |          |                    |          |
| PRRX2    | 9   | 2                  | 5.66E-01 | 2                  | 5.66E-01 | 2                  | 6.49E-01 | 2                  | 6.49E-01 |                    |          |                    |          |
| SLC7A9   | 19  | 4                  | 3.23E-01 | 4                  | 3.23E-01 | 2                  | 7.19E-01 | 2                  | 7.19E-01 | 2                  | 6.49E-01 | 2                  | 6.49E-01 |
| LRTM1    | 3   | 2                  | 1.00E+00 | 2                  | 1.00E+00 | 2                  | 6.49E-01 | 2                  | 6.49E-01 | 1                  | 6.98E-01 | 1                  | 6.98E-01 |
| PLVAP    | 19  | 2                  | 5.67E-01 | 2                  | 5.67E-01 | 2                  | 6.49E-01 | 2                  | 6.49E-01 |                    |          |                    |          |
| KAT2A    | 17  | 2                  | 1.37E-02 | 2                  | 1.37E-02 |                    |          |                    |          | 2                  | 6.49E-01 | 2                  | 6.49E-01 |
| KRT2     | 12  | 2                  | 5.74E-01 | 2                  | 5.74E-01 | 2                  | 6.49E-01 | 2                  | 6.49E-01 |                    |          |                    |          |
| ERO1B    | 1   | 2                  | 5.76E-01 | 2                  | 5.76E-01 | 2                  | 6.49E-01 | 2                  | 6.49E-01 |                    |          |                    |          |
| GFI1     | 1   | 2                  | 5.57E-01 | 2                  | 5.57E-01 | 2                  | 6.49E-01 | 2                  | 6.49E-01 |                    |          |                    |          |
| SLC27A6  | 5   | 1                  | 6.75E-01 | 1                  | 6.75E-01 | 1                  | 6.49E-01 | 1                  | 6.49E-01 |                    |          |                    |          |
| ATP8A1   | 4   | 1                  | 6.75E-01 | 1                  | 6.75E-01 | 1                  | 6.49E-01 | 1                  | 6.49E-01 |                    |          |                    |          |
| XRN1     | 3   | 1                  | 6.75E-01 | 1                  | 6.75E-01 | 1                  | 6.49E-01 | 1                  | 6.49E-01 |                    |          |                    |          |
| TSHB     | 1   | 1                  | 6.75E-01 | 1                  | 6.75E-01 | 1                  | 6.49E-01 | 1                  | 6.49E-01 |                    |          |                    |          |
| AP2A2    | 11  | 1                  | 6.96E-02 | 1                  | 6.96E-02 |                    |          |                    |          | 1                  | 6.49E-01 | 1                  | 6.49E-01 |
| USP44    | 12  | 4                  | 7.91E-01 | 4                  | 7.91E-01 | 3                  | 7.75E-01 | 3                  | 7.75E-01 | 1                  | 6.49E-01 | 1                  | 6.49E-01 |
| CCR2     | 3   | 3                  | 4.76E-01 | 3                  | 4.76E-01 | 2                  | 7.47E-01 | 2                  | 7.47E-01 | 1                  | 6.49E-01 | 1                  | 6.49E-01 |
| ATP6V1G3 | 1   | 1                  | 6.96E-02 | 1                  | 6.96E-02 |                    |          |                    |          | 1                  | 6.49E-01 | 1                  | 6.49E-01 |
| PTPN4    | 2   | 1                  | 6.96E-02 | 1                  | 6.96E-02 |                    |          |                    |          | 1                  | 6.49E-01 | 1                  | 6.49E-01 |
| BST2     | 19  | 3                  | 1.00E+00 | 3                  | 1.00E+00 | 3                  | 6.56E-01 | 3                  | 6.56E-01 | 1                  | 6.49E-01 | 1                  | 6.49E-01 |
| CHD7     | 8   | 4                  | 3.16E-01 | 4                  | 3.16E-01 | 2                  | 7.71E-01 | 2                  | 7.71E-01 | 2                  | 6.49E-01 | 2                  | 6.49E-01 |
| SLC27A2  | 15  | 2                  | 5.39E-01 | 2                  | 5.39E-01 | 2                  | 6.49E-01 | 2                  | 6.49E-01 |                    |          |                    |          |
| ATN1     | 12  | 2                  | 5.39E-01 | 2                  | 5.39E-01 | 2                  | 6.49E-01 | 2                  | 6.49E-01 |                    |          |                    |          |
| SUMF2    | 7   | 5                  | 8.71E-02 | 5                  | 8.71E-02 | 3                  | 7.59E-01 | 3                  | 7.59E-01 | 3                  | 6.49E-01 | 3                  | 6.49E-01 |

| SetID    | Chr | ADEH- vs NA        |          |                    |          | ADEH+ vs ADEH-     |          |                    |          | ADEH+ vs NA        |          |                    |          |
|----------|-----|--------------------|----------|--------------------|----------|--------------------|----------|--------------------|----------|--------------------|----------|--------------------|----------|
|          |     | rare novel         |          | all                |          | rare novel         |          | all                |          | rare novel         |          | all                |          |
|          |     | N variants in test | p-value  | N variants in test | p-value  | N variants in test | p-value  | N variants in test | p-value  | N variants in test | p-value  | N variants in test | p-value  |
| REST     | 4   | 2                  | 5.58E-01 | 2                  | 5.58E-01 | 2                  | 6.50E-01 | 2                  | 6.50E-01 |                    |          |                    |          |
| XIRP1    | 3   | 12                 | 1.00E-01 | 13                 | 1.11E-01 | 9                  | 7.37E-01 | 10                 | 6.50E-01 | 6                  | 6.61E-01 | 7                  | 6.73E-01 |
| KIFC1    | 6   | 3                  | 3.32E-01 | 3                  | 3.32E-01 | 3                  | 6.50E-01 | 3                  | 6.50E-01 |                    |          |                    |          |
| XRCC3    | 14  | 2                  | 5.76E-01 | 2                  | 5.76E-01 | 2                  | 6.50E-01 | 2                  | 6.50E-01 |                    |          |                    |          |
| HMOX2    | 16  | 2                  | 5.53E-01 | 2                  | 5.53E-01 | 2                  | 6.50E-01 | 2                  | 6.50E-01 |                    |          |                    |          |
| GPC5     | 13  | 2                  | 1.81E-02 | 2                  | 1.81E-02 |                    |          |                    |          | 2                  | 6.50E-01 | 2                  | 6.50E-01 |
| POU6F2   | 7   | 1                  | 7.14E-02 | 1                  | 7.14E-02 |                    |          |                    |          | 1                  | 6.50E-01 | 1                  | 6.50E-01 |
| EHMT2    | 6   | 4                  | 7.62E-01 | 4                  | 7.62E-01 | 3                  | 6.72E-01 | 3                  | 6.72E-01 | 1                  | 6.50E-01 | 1                  | 6.50E-01 |
| BLZF1    | 1   | 4                  | 4.16E-01 | 4                  | 4.16E-01 | 3                  | 1.00E+00 | 3                  | 1.00E+00 | 1                  | 6.50E-01 | 1                  | 6.50E-01 |
| QDPR     | 4   | 1                  | 7.14E-02 | 1                  | 7.14E-02 |                    |          |                    |          | 1                  | 6.50E-01 | 1                  | 6.50E-01 |
| SPRYD7   | 13  | 1                  | 7.14E-02 | 1                  | 7.14E-02 |                    |          |                    |          | 1                  | 6.50E-01 | 1                  | 6.50E-01 |
| CASR     | 3   | 1                  | 7.14E-02 | 1                  | 7.14E-02 |                    |          |                    |          | 1                  | 6.50E-01 | 1                  | 6.50E-01 |
| ING2     | 4   | 1                  | 7.14E-02 | 1                  | 7.14E-02 |                    |          |                    |          | 1                  | 6.50E-01 | 1                  | 6.50E-01 |
| LRRC8D   | 1   | 2                  | 5.54E-01 | 2                  | 5.54E-01 | 2                  | 6.50E-01 | 2                  | 6.50E-01 |                    |          |                    |          |
| TMEM183A | 1   | 2                  | 5.59E-01 | 2                  | 5.59E-01 | 2                  | 6.50E-01 | 2                  | 6.50E-01 |                    |          |                    |          |
| TMEM183B | 1   | 2                  | 5.59E-01 | 2                  | 5.59E-01 | 2                  | 6.50E-01 | 2                  | 6.50E-01 |                    |          |                    |          |
| CC2D2A   | 4   | 11                 | 1.51E-01 | 11                 | 1.51E-01 | 9                  | 8.62E-01 | 9                  | 8.62E-01 | 6                  | 6.50E-01 | 6                  | 6.50E-01 |
| IL12RB2  | 1   | 1                  | 7.45E-02 | 1                  | 7.45E-02 |                    |          |                    |          | 1                  | 6.50E-01 | 1                  | 6.50E-01 |
| SNX16    | 8   | 1                  | 7.45E-02 | 1                  | 7.45E-02 |                    |          |                    |          | 1                  | 6.50E-01 | 1                  | 6.50E-01 |
| GTF3A    | 13  | 3                  | 3.11E-01 | 3                  | 3.11E-01 | 2                  | 7.18E-01 | 2                  | 7.18E-01 | 1                  | 6.50E-01 | 1                  | 6.50E-01 |
| RCN1     | 11  | 1                  | 7.45E-02 | 1                  | 7.45E-02 |                    |          |                    |          | 1                  | 6.50E-01 | 1                  | 6.50E-01 |
| ZIC2     | 13  | 1                  | 7.45E-02 | 1                  | 7.45E-02 |                    |          |                    |          | 1                  | 6.50E-01 | 1                  | 6.50E-01 |
| GPN1     | 2   | 1                  | 7.45E-02 | 1                  | 7.45E-02 |                    |          |                    |          | 1                  | 6.50E-01 | 1                  | 6.50E-01 |
| CHIC2    | 4   | 1                  | 7.45E-02 | 1                  | 7.45E-02 |                    |          |                    |          | 1                  | 6.50E-01 | 1                  | 6.50E-01 |
| ALDH3A2  | 17  | 2                  | 1.46E-02 | 2                  | 1.46E-02 |                    |          |                    |          | 2                  | 6.50E-01 | 2                  | 6.50E-01 |
| GALNT9   | 12  | 3                  | 3.43E-01 | 3                  | 3.43E-01 | 3                  | 6.50E-01 | 3                  | 6.50E-01 |                    |          |                    |          |
| PLAA     | 9   | 3                  | 3.38E-01 | 3                  | 3.38E-01 | 3                  | 6.50E-01 | 3                  | 6.50E-01 |                    |          |                    |          |
| CDH18    | 5   | 2                  | 1.56E-02 | 2                  | 1.56E-02 |                    |          |                    |          | 2                  | 6.50E-01 | 2                  | 6.50E-01 |
| TCF7L2   | 10  | 1                  | 6.75E-02 | 1                  | 6.75E-02 |                    |          |                    |          | 1                  | 6.50E-01 | 1                  | 6.50E-01 |
| CLDN12   | 7   | 1                  | 6.75E-02 | 1                  | 6.75E-02 |                    |          |                    |          | 1                  | 6.50E-01 | 1                  | 6.50E-01 |
| CERS3    | 15  | 1                  | 6.75E-02 | 1                  | 6.75E-02 |                    |          |                    |          | 1                  | 6.50E-01 | 1                  | 6.50E-01 |
| SEPSECS  | 4   | 1                  | 6.75E-02 | 1                  | 6.75E-02 |                    |          |                    |          | 1                  | 6.50E-01 | 1                  | 6.50E-01 |
| PRKCD    | 3   | 1                  | 6.75E-02 | 1                  | 6.75E-02 |                    |          |                    |          | 1                  | 6.50E-01 | 1                  | 6.50E-01 |
| FAM110C  | 2   | 1                  | 6.75E-02 | 1                  | 6.75E-02 |                    |          |                    |          | 1                  | 6.50E-01 | 1                  | 6.50E-01 |
| HLTF     | 3   | 1                  | 6.75E-02 | 1                  | 6.75E-02 |                    |          |                    |          | 1                  | 6.50E-01 | 1                  | 6.50E-01 |
| KDM8     | 16  | 1                  | 6.75E-02 | 1                  | 6.75E-02 |                    |          |                    |          | 1                  | 6.50E-01 | 1                  | 6.50E-01 |
| ASAP2    | 2   | 3                  | 3.17E-01 | 3                  | 3.17E-01 | 3                  | 6.50E-01 | 3                  | 6.50E-01 |                    |          |                    |          |
| NAF1     | 4   | 2                  | 3.15E-01 | 2                  | 3.15E-01 | 2                  | 6.50E-01 | 2                  | 6.50E-01 |                    |          |                    |          |
| ITK      | 5   | 1                  | 7.97E-02 | 1                  | 7.97E-02 |                    |          |                    |          | 1                  | 6.50E-01 | 1                  | 6.50E-01 |
| TMPRSS13 | 11  | 1                  | 7.97E-02 | 1                  | 7.97E-02 |                    |          |                    |          | 1                  | 6.50E-01 | 1                  | 6.50E-01 |
| IZUMO1R  | 11  | 1                  | 7.97E-02 | 1                  | 7.97E-02 |                    |          |                    |          | 1                  | 6.50E-01 | 1                  | 6.50E-01 |
| NDUFAF1  | 15  | 1                  | 7.97E-02 | 1                  | 7.97E-02 |                    |          |                    |          | 1                  | 6.50E-01 | 1                  | 6.50E-01 |
| SNAI1    | 20  | 1                  | 7.85E-02 | 1                  | 7.85E-02 |                    |          |                    |          | 1                  | 6.51E-01 | 1                  | 6.51E-01 |
| GZF1     | 20  | 1                  | 7.85E-02 | 1                  | 7.85E-02 |                    |          |                    |          | 1                  | 6.51E-01 | 1                  | 6.51E-01 |
| TMEM252  | 9   | 1                  | 7.84E-01 | 1                  | 7.84E-01 | 1                  | 6.55E-01 | 1                  | 6.55E-01 | 1                  | 6.51E-01 | 1                  | 6.51E-01 |
| TFEB     | 6   | 2                  | 1.00E+00 | 2                  | 1.00E+00 | 2                  | 6.98E-01 | 2                  | 6.98E-01 | 1                  | 6.51E-01 | 1                  | 6.51E-01 |
| STAC2    | 17  | 1                  | 7.85E-02 | 1                  | 7.85E-02 |                    |          |                    |          | 1                  | 6.51E-01 | 1                  | 6.51E-01 |
| MRPS22   | 3   | 1                  | 7.85E-02 | 1                  | 7.85E-02 |                    |          |                    |          | 1                  | 6.51E-01 | 1                  | 6.51E-01 |

| SetID    | Chr | ADEH- vs NA        |          |                    |          | ADEH+ vs ADEH-     |          |                    |          | ADEH+ vs NA        |          |                    |          |
|----------|-----|--------------------|----------|--------------------|----------|--------------------|----------|--------------------|----------|--------------------|----------|--------------------|----------|
|          |     | rare novel         |          | all                |          | rare novel         |          | all                |          | rare novel         |          | all                |          |
|          |     | N variants in test | p-value  | N variants in test | p-value  | N variants in test | p-value  | N variants in test | p-value  | N variants in test | p-value  | N variants in test | p-value  |
| NRCAM    | 7   | 3                  | 6.80E-01 | 3                  | 6.80E-01 | 2                  | 6.67E-01 | 2                  | 6.67E-01 | 1                  | 6.51E-01 | 1                  | 6.51E-01 |
| SNTB1    | 8   | 2                  | 7.26E-01 | 2                  | 7.26E-01 | 2                  | 7.56E-01 | 2                  | 7.56E-01 | 1                  | 6.51E-01 | 1                  | 6.51E-01 |
| GRAMD4   | 22  | 1                  | 7.85E-02 | 1                  | 7.85E-02 |                    |          |                    |          | 1                  | 6.51E-01 | 1                  | 6.51E-01 |
| SNX31    | 8   | 1                  | 7.85E-02 | 1                  | 7.85E-02 |                    |          |                    |          | 1                  | 6.51E-01 | 1                  | 6.51E-01 |
| CHKA     | 11  | 1                  | 7.85E-02 | 1                  | 7.85E-02 |                    |          |                    |          | 1                  | 6.51E-01 | 1                  | 6.51E-01 |
| TMUB2    | 17  | 1                  | 7.85E-02 | 1                  | 7.85E-02 |                    |          |                    |          | 1                  | 6.51E-01 | 1                  | 6.51E-01 |
| ZNF134   | 19  | 1                  | 7.85E-02 | 1                  | 7.85E-02 |                    |          |                    |          | 1                  | 6.51E-01 | 1                  | 6.51E-01 |
| MMS22L   | 6   | 4                  | 8.24E-01 | 5                  | 8.23E-01 | 3                  | 7.60E-01 | 4                  | 7.58E-01 | 1                  | 6.51E-01 | 2                  | 6.68E-01 |
| CD1A     | 1   | 4                  | 8.37E-01 | 4                  | 8.37E-01 | 3                  | 6.51E-01 | 3                  | 6.51E-01 | 2                  | 6.51E-01 | 2                  | 6.51E-01 |
| QTRT1    | 19  | 2                  | 1.74E-02 | 2                  | 1.74E-02 |                    |          |                    |          | 2                  | 6.51E-01 | 2                  | 6.51E-01 |
| APOL3    | 22  | 2                  | 5.64E-01 | 3                  | 6.88E-01 | 2                  | 6.51E-01 | 3                  | 7.64E-01 |                    |          | 1                  | 7.98E-01 |
| INPPL1   | 11  | 2                  | 5.51E-01 | 2                  | 5.51E-01 | 2                  | 6.51E-01 | 2                  | 6.51E-01 |                    |          |                    |          |
| SLC30A9  | 4   | 2                  | 5.62E-01 | 2                  | 5.62E-01 | 2                  | 6.51E-01 | 2                  | 6.51E-01 |                    |          |                    |          |
| PTBP3    | 9   | 2                  | 3.26E-01 | 2                  | 3.26E-01 | 2                  | 6.51E-01 | 2                  | 6.51E-01 |                    |          |                    |          |
| EBF4     | 20  | 2                  | 5.60E-01 | 2                  | 5.60E-01 | 2                  | 6.51E-01 | 2                  | 6.51E-01 |                    |          |                    |          |
| CATSPER1 | 11  | 1                  | 7.68E-02 | 1                  | 7.68E-02 |                    |          |                    |          | 1                  | 6.51E-01 | 1                  | 6.51E-01 |
| SNAP29   | 22  | 2                  | 5.67E-01 | 2                  | 5.67E-01 | 2                  | 6.51E-01 | 2                  | 6.51E-01 |                    |          |                    |          |
| PTPN12   | 7   | 2                  | 5.66E-01 | 2                  | 5.66E-01 | 2                  | 6.51E-01 | 2                  | 6.51E-01 |                    |          |                    |          |
| DNAJC15  | 13  | 1                  | 5.91E-02 | 1                  | 5.91E-02 |                    |          |                    |          | 1                  | 6.51E-01 | 1                  | 6.51E-01 |
| SUGP2    | 19  | 1                  | 5.91E-02 | 1                  | 5.91E-02 |                    |          |                    |          | 1                  | 6.51E-01 | 1                  | 6.51E-01 |
| SMOX     | 20  | 1                  | 5.91E-02 | 1                  | 5.91E-02 |                    |          |                    |          | 1                  | 6.51E-01 | 1                  | 6.51E-01 |
| EXT1     | 8   | 1                  | 5.91E-02 | 1                  | 5.91E-02 |                    |          |                    |          | 1                  | 6.51E-01 | 1                  | 6.51E-01 |
| BDH1     | 3   | 3                  | 5.63E-01 | 3                  | 5.63E-01 | 3                  | 1.00E+00 | 3                  | 1.00E+00 | 1                  | 6.52E-01 | 1                  | 6.52E-01 |
| MED20    | 6   | 1                  | 7.61E-02 | 1                  | 7.61E-02 |                    |          |                    |          | 1                  | 6.52E-01 | 1                  | 6.52E-01 |
| PDLIM1   | 10  | 1                  | 7.61E-02 | 1                  | 7.61E-02 |                    |          |                    |          | 1                  | 6.52E-01 | 1                  | 6.52E-01 |
| STOML2   | 9   | 2                  | 5.79E-01 | 2                  | 5.79E-01 | 2                  | 6.52E-01 | 2                  | 6.52E-01 |                    |          |                    |          |
| SHROOM1  | 5   | 2                  | 5.67E-01 | 2                  | 5.67E-01 | 2                  | 6.52E-01 | 2                  | 6.52E-01 |                    |          |                    |          |
| L3MBTL3  | 6   | 2                  | 5.64E-01 | 2                  | 5.64E-01 | 2                  | 6.52E-01 | 2                  | 6.52E-01 |                    |          |                    |          |
| BEND4    | 4   | 2                  | 5.67E-01 | 2                  | 5.67E-01 | 2                  | 6.52E-01 | 2                  | 6.52E-01 |                    |          |                    |          |
| PER3     | 1   | 3                  | 7.27E-01 | 3                  | 7.27E-01 | 2                  | 6.52E-01 | 2                  | 6.52E-01 | 1                  | 6.65E-01 | 1                  | 6.65E-01 |
| SOX5     | 12  | 1                  | 5.88E-02 | 1                  | 5.88E-02 |                    |          |                    |          | 1                  | 6.52E-01 | 1                  | 6.52E-01 |
| PANK4    | 1   | 1                  | 5.88E-02 | 1                  | 5.88E-02 |                    |          |                    |          | 1                  | 6.52E-01 | 1                  | 6.52E-01 |
| PTPRG    | 3   | 1                  | 5.88E-02 | 1                  | 5.88E-02 |                    |          |                    |          | 1                  | 6.52E-01 | 1                  | 6.52E-01 |
| SLC22A13 | 3   | 1                  | 5.88E-02 | 1                  | 5.88E-02 |                    |          |                    |          | 1                  | 6.52E-01 | 1                  | 6.52E-01 |
| RNF144B  | 6   | 1                  | 5.88E-02 | 1                  | 5.88E-02 |                    |          |                    |          | 1                  | 6.52E-01 | 1                  | 6.52E-01 |
| INSIG2   | 2   | 1                  | 5.88E-02 | 1                  | 5.88E-02 |                    |          |                    |          | 1                  | 6.52E-01 | 1                  | 6.52E-01 |
| RAB12    | 18  | 1                  | 5.88E-02 | 1                  | 5.88E-02 |                    |          |                    |          | 1                  | 6.52E-01 | 1                  | 6.52E-01 |
| HOXA11   | 7   | 2                  | 5.72E-01 | 2                  | 5.72E-01 | 2                  | 6.52E-01 | 2                  | 6.52E-01 |                    |          |                    |          |
| ZNF334   | 20  | 2                  | 5.64E-01 | 2                  | 5.64E-01 | 2                  | 6.52E-01 | 2                  | 6.52E-01 |                    |          |                    |          |
| VPS72    | 1   | 2                  | 5.70E-01 | 2                  | 5.70E-01 | 2                  | 6.53E-01 | 2                  | 6.53E-01 |                    |          |                    |          |
| ADI1     | 2   | 1                  | 6.93E-02 | 1                  | 6.93E-02 |                    |          |                    |          | 1                  | 6.53E-01 | 1                  | 6.53E-01 |
| ZNF585A  | 19  | 4                  | 5.93E-01 | 4                  | 5.93E-01 | 3                  | 8.57E-01 | 3                  | 8.57E-01 | 1                  | 6.53E-01 | 1                  | 6.53E-01 |
| CORO1A   | 16  | 1                  | 6.93E-02 | 1                  | 6.93E-02 |                    |          |                    |          | 1                  | 6.53E-01 | 1                  | 6.53E-01 |
| FOXO1    | 13  | 1                  | 6.93E-02 | 1                  | 6.93E-02 |                    |          |                    |          | 1                  | 6.53E-01 | 1                  | 6.53E-01 |
| IL5      | 5   | 1                  | 6.93E-02 | 1                  | 6.93E-02 |                    |          |                    |          | 1                  | 6.53E-01 | 1                  | 6.53E-01 |
| ASCL4    | 12  | 2                  | 5.72E-01 | 2                  | 5.72E-01 | 2                  | 6.53E-01 | 2                  | 6.53E-01 |                    |          |                    |          |
| ZNF70    | 22  | 1                  | 9.07E-02 | 1                  | 9.07E-02 |                    |          |                    |          | 1                  | 6.53E-01 | 1                  | 6.53E-01 |
| PFN3     | 5   | 1                  | 9.07E-02 | 1                  | 9.07E-02 |                    |          |                    |          | 1                  | 6.53E-01 | 1                  | 6.53E-01 |

| SetID    | Chr | ADEH- vs NA        |          |                    |          | ADEH+ vs ADEH-     |          |                    |          | ADEH+ vs NA        |          |                    |          |
|----------|-----|--------------------|----------|--------------------|----------|--------------------|----------|--------------------|----------|--------------------|----------|--------------------|----------|
|          |     | rarenovel          |          | all                |          | rarenovel          |          | all                |          | rarenovel          |          | all                |          |
|          |     | N variants in test | p-value  | N variants in test | p-value  | N variants in test | p-value  | N variants in test | p-value  | N variants in test | p-value  | N variants in test | p-value  |
| RPP14    | 3   | 1                  | 9.07E-02 | 1                  | 9.07E-02 |                    |          |                    |          | 1                  | 6.53E-01 | 1                  | 6.53E-01 |
| ARCN1    | 11  | 4                  | 7.98E-01 | 4                  | 7.98E-01 | 3                  | 6.53E-01 | 3                  | 6.53E-01 | 1                  | 6.59E-01 | 1                  | 6.59E-01 |
| MLH3     | 14  | 4                  | 8.27E-01 | 4                  | 8.27E-01 | 3                  | 8.39E-01 | 3                  | 8.39E-01 | 2                  | 6.53E-01 | 2                  | 6.53E-01 |
| TGFB1    | 5   | 5                  | 5.00E-01 | 5                  | 5.00E-01 | 3                  | 7.97E-01 | 3                  | 7.97E-01 | 2                  | 6.53E-01 | 2                  | 6.53E-01 |
| GRM2     | 3   | 3                  | 5.97E-01 | 3                  | 5.97E-01 | 2                  | 6.53E-01 | 2                  | 6.53E-01 | 1                  | 7.02E-01 | 1                  | 7.02E-01 |
| MON1A    | 3   | 2                  | 5.64E-01 | 2                  | 5.64E-01 | 2                  | 6.53E-01 | 2                  | 6.53E-01 |                    |          |                    |          |
| GIMAP4   | 7   | 2                  | 5.86E-01 | 2                  | 5.86E-01 | 2                  | 6.53E-01 | 2                  | 6.53E-01 |                    |          |                    |          |
| B3GNT4   | 12  | 3                  | 3.36E-01 | 3                  | 3.36E-01 | 3                  | 6.53E-01 | 3                  | 6.53E-01 |                    |          |                    |          |
| ABCD3    | 1   | 2                  | 1.96E-02 | 2                  | 1.96E-02 |                    |          |                    |          | 2                  | 6.53E-01 | 2                  | 6.53E-01 |
| PARP10   | 8   | 3                  | 6.21E-01 | 3                  | 6.21E-01 | 3                  | 1.00E+00 | 3                  | 1.00E+00 | 2                  | 6.54E-01 | 2                  | 6.54E-01 |
| PLEKHM3  | 2   | 4                  | 2.32E-01 | 4                  | 2.32E-01 | 4                  | 6.54E-01 | 4                  | 6.54E-01 |                    |          |                    |          |
| UBQLN3   | 11  | 3                  | 9.28E-01 | 3                  | 9.28E-01 | 3                  | 6.54E-01 | 3                  | 6.54E-01 | 1                  | 6.65E-01 | 1                  | 6.65E-01 |
| FAM200A  | 7   | 2                  | 5.93E-01 | 2                  | 5.93E-01 | 1                  | 1.00E+00 | 1                  | 1.00E+00 | 2                  | 6.54E-01 | 2                  | 6.54E-01 |
| DSP      | 6   | 10                 | 6.79E-02 | 10                 | 6.79E-02 | 9                  | 1.00E+00 | 9                  | 1.00E+00 | 6                  | 6.54E-01 | 6                  | 6.54E-01 |
| NME5     | 5   | 2                  | 5.71E-01 | 2                  | 5.71E-01 | 2                  | 6.54E-01 | 2                  | 6.54E-01 |                    |          |                    |          |
| ACLY     | 17  | 3                  | 3.34E-01 | 3                  | 3.34E-01 | 3                  | 6.54E-01 | 3                  | 6.54E-01 |                    |          |                    |          |
| PXK      | 3   | 2                  | 1.71E-02 | 2                  | 1.71E-02 |                    |          |                    |          | 2                  | 6.54E-01 | 2                  | 6.54E-01 |
| DCAF15   | 19  | 2                  | 5.65E-01 | 2                  | 5.65E-01 | 2                  | 6.55E-01 | 2                  | 6.55E-01 |                    |          |                    |          |
| COL5A1   | 9   | 10                 | 3.15E-01 | 10                 | 3.15E-01 | 8                  | 9.06E-01 | 8                  | 9.06E-01 | 6                  | 6.55E-01 | 6                  | 6.55E-01 |
| FHDC1    | 4   | 5                  | 5.14E-01 | 6                  | 5.14E-01 | 5                  | 1.00E+00 | 6                  | 1.00E+00 | 2                  | 6.55E-01 | 3                  | 6.56E-01 |
| ATP2C1   | 3   | 3                  | 5.59E-01 | 3                  | 5.59E-01 | 2                  | 6.55E-01 | 2                  | 6.55E-01 | 1                  | 6.57E-01 | 1                  | 6.57E-01 |
| NCAPG    | 4   | 2                  | 5.74E-01 | 2                  | 5.74E-01 | 2                  | 6.55E-01 | 2                  | 6.55E-01 |                    |          |                    |          |
| SCNN1D   | 1   | 4                  | 7.55E-01 | 4                  | 7.55E-01 | 3                  | 6.55E-01 | 3                  | 6.55E-01 | 1                  | 6.89E-01 | 1                  | 6.89E-01 |
| OR7G2    | 19  | 1                  | 8.44E-02 | 1                  | 8.44E-02 |                    |          |                    |          | 1                  | 6.55E-01 | 1                  | 6.55E-01 |
| ZNF282   | 7   | 1                  | 8.44E-02 | 1                  | 8.44E-02 |                    |          |                    |          | 1                  | 6.55E-01 | 1                  | 6.55E-01 |
| ANP32D   | 12  | 1                  | 7.71E-01 | 1                  | 7.71E-01 | 1                  | 1.00E+00 | 1                  | 1.00E+00 | 1                  | 6.55E-01 | 1                  | 6.55E-01 |
| GNPAT    | 1   | 1                  | 8.44E-02 | 1                  | 8.44E-02 |                    |          |                    |          | 1                  | 6.55E-01 | 1                  | 6.55E-01 |
| AKT1     | 14  | 1                  | 8.44E-02 | 1                  | 8.44E-02 |                    |          |                    |          | 1                  | 6.55E-01 | 1                  | 6.55E-01 |
| CACNB3   | 12  | 1                  | 7.27E-01 | 1                  | 7.27E-01 | 1                  | 1.00E+00 | 1                  | 1.00E+00 | 1                  | 6.55E-01 | 1                  | 6.55E-01 |
| AP1G1    | 16  | 1                  | 7.07E-02 | 1                  | 7.07E-02 |                    |          |                    |          | 1                  | 6.55E-01 | 1                  | 6.55E-01 |
| PIN1     | 19  | 1                  | 7.07E-02 | 1                  | 7.07E-02 |                    |          |                    |          | 1                  | 6.55E-01 | 1                  | 6.55E-01 |
| FIP1L1   | 4   | 3                  | 3.33E-01 | 3                  | 3.33E-01 | 3                  | 6.56E-01 | 3                  | 6.56E-01 |                    |          |                    |          |
| ARHGAP10 | 4   | 3                  | 1.24E-01 | 3                  | 1.24E-01 | 1                  | 6.86E-01 | 1                  | 6.86E-01 | 2                  | 6.56E-01 | 2                  | 6.56E-01 |
| ZNF45    | 19  | 1                  | 8.32E-02 | 1                  | 8.32E-02 |                    |          |                    |          | 1                  | 6.56E-01 | 1                  | 6.56E-01 |
| SNX7     | 1   | 1                  | 8.32E-02 | 1                  | 8.32E-02 |                    |          |                    |          | 1                  | 6.56E-01 | 1                  | 6.56E-01 |
| AADAACL2 | 3   | 3                  | 4.84E-01 | 3                  | 4.84E-01 | 2                  | 6.98E-01 | 2                  | 6.98E-01 | 1                  | 6.56E-01 | 1                  | 6.56E-01 |
| ZNF250   | 8   | 1                  | 8.32E-02 | 1                  | 8.32E-02 |                    |          |                    |          | 1                  | 6.56E-01 | 1                  | 6.56E-01 |
| MREG     | 2   | 2                  | 5.50E-01 | 2                  | 5.50E-01 | 2                  | 6.56E-01 | 2                  | 6.56E-01 |                    |          |                    |          |
| HARS2    | 5   | 2                  | 5.69E-01 | 2                  | 5.69E-01 | 2                  | 6.56E-01 | 2                  | 6.56E-01 |                    |          |                    |          |
| METRNL   | 17  | 3                  | 6.70E-01 | 3                  | 6.70E-01 | 2                  | 6.56E-01 | 2                  | 6.56E-01 | 1                  | 6.58E-01 | 1                  | 6.58E-01 |
| IL31RA   | 5   | 3                  | 3.20E-01 | 3                  | 3.20E-01 | 3                  | 6.56E-01 | 3                  | 6.56E-01 |                    |          |                    |          |
| MSH2     | 2   | 2                  | 5.74E-01 | 2                  | 5.74E-01 | 2                  | 6.56E-01 | 2                  | 6.56E-01 |                    |          |                    |          |
| TYR      | 11  |                    |          | 1                  | 7.52E-01 |                    |          | 1                  | 6.56E-01 |                    |          | 1                  | 6.76E-01 |
| BIRC7    | 20  | 5                  | 1.00E+00 | 5                  | 1.00E+00 | 4                  | 7.61E-01 | 4                  | 7.61E-01 | 3                  | 6.57E-01 | 3                  | 6.57E-01 |
| NUPR2    | 7   | 1                  | 7.48E-02 | 1                  | 7.48E-02 |                    |          |                    |          | 1                  | 6.57E-01 | 1                  | 6.57E-01 |
| DPYSL3   | 5   | 1                  | 7.48E-02 | 1                  | 7.48E-02 |                    |          |                    |          | 1                  | 6.57E-01 | 1                  | 6.57E-01 |
| RDH12    | 14  | 1                  | 7.48E-02 | 1                  | 7.48E-02 |                    |          |                    |          | 1                  | 6.57E-01 | 1                  | 6.57E-01 |
| PRRG4    | 11  | 1                  | 7.48E-02 | 1                  | 7.48E-02 |                    |          |                    |          | 1                  | 6.57E-01 | 1                  | 6.57E-01 |

| SetID     | Chr | ADEH- vs NA        |          |                    |          | ADEH+ vs ADEH-     |          |                    |          | ADEH+ vs NA        |          |                    |          |
|-----------|-----|--------------------|----------|--------------------|----------|--------------------|----------|--------------------|----------|--------------------|----------|--------------------|----------|
|           |     | rarenovel          |          | all                |          | rarenovel          |          | all                |          | rarenovel          |          | all                |          |
|           |     | N variants in test | p-value  | N variants in test | p-value  | N variants in test | p-value  | N variants in test | p-value  | N variants in test | p-value  | N variants in test | p-value  |
| PTGES2    | 9   | 2                  | 5.73E-01 | 2                  | 5.73E-01 | 2                  | 6.57E-01 | 2                  | 6.57E-01 |                    |          |                    |          |
| PATL1     | 11  | 2                  | 5.46E-01 | 2                  | 5.46E-01 | 2                  | 6.57E-01 | 2                  | 6.57E-01 |                    |          |                    |          |
| PMPCB     | 7   | 2                  | 5.55E-01 | 2                  | 5.55E-01 | 2                  | 6.57E-01 | 2                  | 6.57E-01 |                    |          |                    |          |
| MYBL2     | 20  | 1                  | 7.14E-02 | 1                  | 7.14E-02 |                    |          |                    |          | 1                  | 6.57E-01 | 1                  | 6.57E-01 |
| IPO11     | 5   | 1                  | 7.14E-02 | 1                  | 7.14E-02 |                    |          |                    |          | 1                  | 6.57E-01 | 1                  | 6.57E-01 |
| FNIP1     | 5   | 3                  | 7.52E-01 | 3                  | 7.52E-01 | 3                  | 8.01E-01 | 3                  | 8.01E-01 | 1                  | 6.57E-01 | 1                  | 6.57E-01 |
| NEK3      | 13  | 1                  | 7.14E-02 | 1                  | 7.14E-02 |                    |          |                    |          | 1                  | 6.57E-01 | 1                  | 6.57E-01 |
| TGDS      | 13  | 2                  | 5.70E-01 | 2                  | 5.70E-01 | 2                  | 6.57E-01 | 2                  | 6.57E-01 |                    |          |                    |          |
| EPHB4     | 7   | 2                  | 5.75E-01 | 2                  | 5.75E-01 | 2                  | 6.57E-01 | 2                  | 6.57E-01 |                    |          |                    |          |
| ATAD5     | 17  | 8                  | 6.31E-01 | 10                 | 6.54E-01 | 6                  | 6.69E-01 | 8                  | 6.57E-01 | 4                  | 8.60E-01 | 6                  | 8.66E-01 |
| AMER3     | 2   | 2                  | 5.72E-01 | 2                  | 5.72E-01 | 2                  | 6.57E-01 | 2                  | 6.57E-01 |                    |          |                    |          |
| GPRC5A    | 12  | 1                  | 6.12E-02 | 1                  | 6.12E-02 |                    |          |                    |          | 1                  | 6.57E-01 | 1                  | 6.57E-01 |
| TREM1     | 6   | 1                  | 6.12E-02 | 1                  | 6.12E-02 |                    |          |                    |          | 1                  | 6.57E-01 | 1                  | 6.57E-01 |
| CACNA1D   | 3   | 4                  | 8.62E-01 | 4                  | 8.62E-01 | 3                  | 7.85E-01 | 3                  | 7.85E-01 | 2                  | 6.58E-01 | 2                  | 6.58E-01 |
| ZNF233    | 19  | 3                  | 3.23E-01 | 3                  | 3.23E-01 | 3                  | 6.58E-01 | 3                  | 6.58E-01 |                    |          |                    |          |
| TOMM6     | 6   | 1                  | 7.87E-02 | 1                  | 7.87E-02 |                    |          |                    |          | 1                  | 6.58E-01 | 1                  | 6.58E-01 |
| PAX1      | 20  | 1                  | 7.87E-02 | 1                  | 7.87E-02 |                    |          |                    |          | 1                  | 6.58E-01 | 1                  | 6.58E-01 |
| ASB14     | 3   | 1                  | 7.87E-02 | 1                  | 7.87E-02 |                    |          |                    |          | 1                  | 6.58E-01 | 1                  | 6.58E-01 |
| SPAG8     | 9   | 3                  | 8.17E-01 | 3                  | 8.17E-01 | 3                  | 1.00E+00 | 3                  | 1.00E+00 | 2                  | 6.58E-01 | 2                  | 6.58E-01 |
| FUOM      | 10  | 2                  | 5.75E-01 | 2                  | 5.75E-01 | 2                  | 6.58E-01 | 2                  | 6.58E-01 |                    |          |                    |          |
| DDX41     | 5   | 2                  | 5.76E-01 | 2                  | 5.76E-01 | 2                  | 6.58E-01 | 2                  | 6.58E-01 |                    |          |                    |          |
| OR8B8     | 11  | 2                  | 2.31E-01 | 2                  | 2.31E-01 | 1                  | 1.00E+00 | 1                  | 1.00E+00 | 1                  | 6.58E-01 | 1                  | 6.58E-01 |
| KIAA0355  | 19  | 1                  | 7.83E-02 | 1                  | 7.83E-02 |                    |          |                    |          | 1                  | 6.58E-01 | 1                  | 6.58E-01 |
| IL1RL1    | 2   | 1                  | 7.83E-02 | 1                  | 7.83E-02 |                    |          |                    |          | 1                  | 6.58E-01 | 1                  | 6.58E-01 |
| MARK1     | 1   | 3                  | 7.34E-01 | 3                  | 7.34E-01 | 3                  | 8.50E-01 | 3                  | 8.50E-01 | 1                  | 6.58E-01 | 1                  | 6.58E-01 |
| NOVA1     | 14  | 1                  | 7.83E-02 | 1                  | 7.83E-02 |                    |          |                    |          | 1                  | 6.58E-01 | 1                  | 6.58E-01 |
| TRIM17    | 1   | 2                  | 5.68E-01 | 2                  | 5.68E-01 | 2                  | 6.58E-01 | 2                  | 6.58E-01 |                    |          |                    |          |
| SEC24C    | 10  | 4                  | 8.31E-01 | 4                  | 8.31E-01 | 3                  | 7.61E-01 | 3                  | 7.61E-01 | 1                  | 6.58E-01 | 1                  | 6.58E-01 |
| SLC36A4   | 11  | 3                  | 9.15E-01 | 3                  | 9.15E-01 | 3                  | 6.64E-01 | 3                  | 6.64E-01 | 1                  | 6.58E-01 | 1                  | 6.58E-01 |
| MRPS18C   | 4   | 1                  | 8.02E-02 | 1                  | 8.02E-02 |                    |          |                    |          | 1                  | 6.58E-01 | 1                  | 6.58E-01 |
| EWSR1     | 22  | 1                  | 8.02E-02 | 1                  | 8.02E-02 |                    |          |                    |          | 1                  | 6.58E-01 | 1                  | 6.58E-01 |
| ALX4      | 11  | 1                  | 7.46E-02 | 1                  | 7.46E-02 |                    |          |                    |          | 1                  | 6.58E-01 | 1                  | 6.58E-01 |
| LYG2      | 2   | 1                  | 7.46E-02 | 1                  | 7.46E-02 |                    |          |                    |          | 1                  | 6.58E-01 | 1                  | 6.58E-01 |
| GATC      | 12  | 1                  | 7.46E-02 | 1                  | 7.46E-02 |                    |          |                    |          | 1                  | 6.58E-01 | 1                  | 6.58E-01 |
| WLS       | 1   | 1                  | 7.46E-02 | 1                  | 7.46E-02 |                    |          |                    |          | 1                  | 6.58E-01 | 1                  | 6.58E-01 |
| SIM1      | 6   | 2                  | 5.70E-01 | 2                  | 5.70E-01 | 2                  | 6.58E-01 | 2                  | 6.58E-01 |                    |          |                    |          |
| CPNE7     | 16  | 2                  | 9.20E-01 | 2                  | 9.20E-01 | 2                  | 6.58E-01 | 2                  | 6.58E-01 | 1                  | 6.70E-01 | 1                  | 6.70E-01 |
| RDH5      | 12  | 2                  | 5.57E-01 | 2                  | 5.57E-01 | 2                  | 6.59E-01 | 2                  | 6.59E-01 |                    |          |                    |          |
| C20orf141 | 20  | 2                  | 3.33E-01 | 2                  | 3.33E-01 | 2                  | 6.59E-01 | 2                  | 6.59E-01 |                    |          |                    |          |
| CCDC174   | 3   | 1                  | 7.82E-02 | 1                  | 7.82E-02 |                    |          |                    |          | 1                  | 6.59E-01 | 1                  | 6.59E-01 |
| PRRT2     | 16  | 1                  | 7.82E-02 | 1                  | 7.82E-02 |                    |          |                    |          | 1                  | 6.59E-01 | 1                  | 6.59E-01 |
| NFAM1     | 22  | 1                  | 7.82E-02 | 1                  | 7.82E-02 |                    |          |                    |          | 1                  | 6.59E-01 | 1                  | 6.59E-01 |
| PDE2A     | 11  | 1                  | 7.82E-02 | 1                  | 7.82E-02 |                    |          |                    |          | 1                  | 6.59E-01 | 1                  | 6.59E-01 |
| MEPCE     | 7   | 1                  | 7.82E-02 | 1                  | 7.82E-02 |                    |          |                    |          | 1                  | 6.59E-01 | 1                  | 6.59E-01 |
| ARFGAP2   | 11  | 3                  | 7.26E-01 | 3                  | 7.26E-01 | 2                  | 6.59E-01 | 2                  | 6.59E-01 | 1                  | 6.65E-01 | 1                  | 6.65E-01 |
| BSDC1     | 1   | 2                  | 5.68E-01 | 2                  | 5.68E-01 | 2                  | 6.59E-01 | 2                  | 6.59E-01 |                    |          |                    |          |
| TSC22D4   | 7   | 2                  | 6.87E-01 | 2                  | 6.87E-01 | 1                  | 1.00E+00 | 1                  | 1.00E+00 | 2                  | 6.59E-01 | 2                  | 6.59E-01 |
| MTIF2     | 2   | 3                  | 9.18E-01 | 3                  | 9.18E-01 | 3                  | 7.68E-01 | 3                  | 7.68E-01 | 1                  | 6.59E-01 | 1                  | 6.59E-01 |

| SetID    | Chr | ADEH- vs NA        |          |                    |          | ADEH+ vs ADEH-     |          |                    |          | ADEH+ vs NA        |          |                    |          |
|----------|-----|--------------------|----------|--------------------|----------|--------------------|----------|--------------------|----------|--------------------|----------|--------------------|----------|
|          |     | rare novel         |          | all                |          | rare novel         |          | all                |          | rare novel         |          | all                |          |
|          |     | N variants in test | p-value  | N variants in test | p-value  | N variants in test | p-value  | N variants in test | p-value  | N variants in test | p-value  | N variants in test | p-value  |
| ABHD16A  | 6   | 1                  | 7.02E-02 | 1                  | 7.02E-02 |                    |          |                    |          | 1                  | 6.59E-01 | 1                  | 6.59E-01 |
| UBXN6    | 19  | 3                  | 4.77E-01 | 3                  | 4.77E-01 | 2                  | 7.46E-01 | 2                  | 7.46E-01 | 1                  | 6.59E-01 | 1                  | 6.59E-01 |
| LYST     | 1   | 10                 | 8.94E-01 | 10                 | 8.94E-01 | 9                  | 1.00E+00 | 9                  | 1.00E+00 | 5                  | 6.59E-01 | 5                  | 6.59E-01 |
| ITGB3    | 17  | 4                  | 8.34E-01 | 4                  | 8.34E-01 | 3                  | 7.87E-01 | 3                  | 7.87E-01 | 1                  | 6.59E-01 | 1                  | 6.59E-01 |
| COLEC10  | 8   | 1                  | 8.24E-02 | 1                  | 8.24E-02 |                    |          |                    |          | 1                  | 6.59E-01 | 1                  | 6.59E-01 |
| IFT57    | 3   | 1                  | 8.24E-02 | 1                  | 8.24E-02 |                    |          |                    |          | 1                  | 6.59E-01 | 1                  | 6.59E-01 |
| FOXRED1  | 11  | 1                  | 8.24E-02 | 1                  | 8.24E-02 |                    |          |                    |          | 1                  | 6.59E-01 | 1                  | 6.59E-01 |
| C1orf198 | 1   | 1                  | 8.24E-02 | 1                  | 8.24E-02 |                    |          |                    |          | 1                  | 6.59E-01 | 1                  | 6.59E-01 |
| RIMS1    | 6   | 3                  | 8.48E-01 | 3                  | 8.48E-01 | 3                  | 1.00E+00 | 3                  | 1.00E+00 | 1                  | 6.59E-01 | 1                  | 6.59E-01 |
| MYPOP    | 19  | 1                  | 7.72E-02 | 1                  | 7.72E-02 |                    |          |                    |          | 1                  | 6.59E-01 | 1                  | 6.59E-01 |
| CCDC168  | 13  | 2                  | 5.62E-01 | 2                  | 5.62E-01 | 2                  | 6.59E-01 | 2                  | 6.59E-01 |                    |          |                    |          |
| HECTD3   | 1   | 3                  | 3.25E-01 | 3                  | 3.25E-01 | 3                  | 6.60E-01 | 3                  | 6.60E-01 |                    |          |                    |          |
| RNF111   | 15  | 3                  | 3.37E-01 | 3                  | 3.37E-01 | 3                  | 6.60E-01 | 3                  | 6.60E-01 |                    |          |                    |          |
| DRAM2    | 1   | 3                  | 2.15E-01 | 3                  | 2.15E-01 | 3                  | 6.60E-01 | 3                  | 6.60E-01 |                    |          |                    |          |
| LMNB1    | 5   | 1                  | 6.96E-02 | 1                  | 6.96E-02 |                    |          |                    |          | 1                  | 6.60E-01 | 1                  | 6.60E-01 |
| C12orf4  | 12  | 1                  | 6.96E-02 | 1                  | 6.96E-02 |                    |          |                    |          | 1                  | 6.60E-01 | 1                  | 6.60E-01 |
| FOXE1    | 9   | 1                  | 8.03E-02 | 1                  | 8.03E-02 |                    |          |                    |          | 1                  | 6.60E-01 | 1                  | 6.60E-01 |
| AMPD2    | 1   | 1                  | 8.03E-02 | 1                  | 8.03E-02 |                    |          |                    |          | 1                  | 6.60E-01 | 1                  | 6.60E-01 |
| OTX2     | 14  | 1                  | 8.03E-02 | 1                  | 8.03E-02 |                    |          |                    |          | 1                  | 6.60E-01 | 1                  | 6.60E-01 |
| THRB     | 3   | 1                  | 8.03E-02 | 1                  | 8.03E-02 |                    |          |                    |          | 1                  | 6.60E-01 | 1                  | 6.60E-01 |
| APBA1    | 9   | 1                  | 8.03E-02 | 1                  | 8.03E-02 |                    |          |                    |          | 1                  | 6.60E-01 | 1                  | 6.60E-01 |
| TRAPPC6B | 14  | 1                  | 8.03E-02 | 1                  | 8.03E-02 |                    |          |                    |          | 1                  | 6.60E-01 | 1                  | 6.60E-01 |
| ZNF383   | 19  | 1                  | 8.03E-02 | 1                  | 8.03E-02 |                    |          |                    |          | 1                  | 6.60E-01 | 1                  | 6.60E-01 |
| COL9A2   | 1   | 3                  | 2.04E-01 | 3                  | 2.04E-01 | 1                  | 1.00E+00 | 1                  | 1.00E+00 | 3                  | 6.62E-01 | 3                  | 6.62E-01 |
| CRHR2    | 7   | 4                  | 1.00E+00 | 4                  | 1.00E+00 | 3                  | 1.00E+00 | 3                  | 1.00E+00 | 3                  | 6.62E-01 | 3                  | 6.62E-01 |
| SNRNP48  | 6   | 3                  | 3.47E-01 | 3                  | 3.47E-01 | 3                  | 6.62E-01 | 3                  | 6.62E-01 |                    |          |                    |          |
| SDC3     | 1   | 3                  | 2.15E-01 | 3                  | 2.15E-01 | 3                  | 6.62E-01 | 3                  | 6.62E-01 |                    |          |                    |          |
| PLXNA2   | 1   | 8                  | 1.13E-01 | 8                  | 1.13E-01 | 7                  | 6.62E-01 | 7                  | 6.62E-01 | 4                  | 1.00E+00 | 4                  | 1.00E+00 |
| PAX7     | 1   | 3                  | 1.55E-01 | 3                  | 1.55E-01 | 1                  | 1.00E+00 | 1                  | 1.00E+00 | 2                  | 6.62E-01 | 2                  | 6.62E-01 |
| PPM1H    | 12  | 1                  | 9.00E-02 | 1                  | 9.00E-02 |                    |          |                    |          | 1                  | 6.63E-01 | 1                  | 6.63E-01 |
| SPC25    | 2   | 1                  | 9.00E-02 | 1                  | 9.00E-02 |                    |          |                    |          | 1                  | 6.63E-01 | 1                  | 6.63E-01 |
| WDR61    | 15  | 1                  | 9.00E-02 | 1                  | 9.00E-02 |                    |          |                    |          | 1                  | 6.63E-01 | 1                  | 6.63E-01 |
| RDX      | 11  | 1                  | 9.00E-02 | 1                  | 9.00E-02 |                    |          |                    |          | 1                  | 6.63E-01 | 1                  | 6.63E-01 |
| TMEM199  | 17  | 4                  | 8.50E-01 | 4                  | 8.50E-01 | 3                  | 7.58E-01 | 3                  | 7.58E-01 | 1                  | 6.63E-01 | 1                  | 6.63E-01 |
| FFAR2    | 19  | 3                  | 1.00E+00 | 3                  | 1.00E+00 | 3                  | 7.50E-01 | 3                  | 7.50E-01 | 1                  | 6.63E-01 | 1                  | 6.63E-01 |
| CHEK1    | 11  | 1                  | 7.70E-02 | 1                  | 7.70E-02 |                    |          |                    |          | 1                  | 6.63E-01 | 1                  | 6.63E-01 |
| BMP2     | 20  | 1                  | 7.70E-02 | 1                  | 7.70E-02 |                    |          |                    |          | 1                  | 6.63E-01 | 1                  | 6.63E-01 |
| LHFPL2   | 5   | 1                  | 7.70E-02 | 1                  | 7.70E-02 |                    |          |                    |          | 1                  | 6.63E-01 | 1                  | 6.63E-01 |
| DAPK3    | 19  | 2                  | 5.47E-01 | 2                  | 5.47E-01 | 2                  | 6.63E-01 | 2                  | 6.63E-01 |                    |          |                    |          |
| SPAST    | 2   | 2                  | 5.65E-01 | 2                  | 5.65E-01 | 2                  | 6.64E-01 | 2                  | 6.64E-01 |                    |          |                    |          |
| LRSAM1   | 9   | 2                  | 5.52E-01 | 2                  | 5.52E-01 | 2                  | 6.64E-01 | 2                  | 6.64E-01 |                    |          |                    |          |
| FICD     | 12  | 3                  | 3.47E-01 | 3                  | 3.47E-01 | 3                  | 6.64E-01 | 3                  | 6.64E-01 |                    |          |                    |          |
| ZC3H12C  | 11  | 2                  | 1.00E+00 | 2                  | 1.00E+00 | 2                  | 7.51E-01 | 2                  | 7.51E-01 | 1                  | 6.64E-01 | 1                  | 6.64E-01 |
| SERPINF1 | 17  | 1                  | 7.28E-02 | 1                  | 7.28E-02 |                    |          |                    |          | 1                  | 6.64E-01 | 1                  | 6.64E-01 |
| HSDL1    | 16  | 1                  | 7.28E-02 | 1                  | 7.28E-02 |                    |          |                    |          | 1                  | 6.64E-01 | 1                  | 6.64E-01 |
| NOL9     | 1   | 1                  | 7.76E-02 | 2                  | 1.04E-01 |                    |          | 1                  | 6.64E-01 | 1                  | 6.74E-01 | 2                  | 7.60E-01 |
| OR56A4   | 11  | 1                  | 8.27E-02 | 1                  | 8.27E-02 |                    |          |                    |          | 1                  | 6.64E-01 | 1                  | 6.64E-01 |
| GNPDA1   | 5   | 1                  | 8.27E-02 | 1                  | 8.27E-02 |                    |          |                    |          | 1                  | 6.64E-01 | 1                  | 6.64E-01 |

| SetID    | Chr | ADEH- vs NA        |          |                    |          | ADEH+ vs ADEH-     |          |                    |          | ADEH+ vs NA        |          |                    |          |
|----------|-----|--------------------|----------|--------------------|----------|--------------------|----------|--------------------|----------|--------------------|----------|--------------------|----------|
|          |     | rarenovel          |          | all                |          | rarenovel          |          | all                |          | rarenovel          |          | all                |          |
|          |     | N variants in test | p-value  | N variants in test | p-value  | N variants in test | p-value  | N variants in test | p-value  | N variants in test | p-value  | N variants in test | p-value  |
| IVNS1ABP | 1   | 1                  | 8.27E-02 | 1                  | 8.27E-02 |                    |          |                    |          |                    |          |                    |          |
| IL32     | 16  | 2                  | 5.64E-01 | 2                  | 5.64E-01 | 2                  | 6.64E-01 | 2                  | 6.64E-01 |                    |          |                    |          |
| CREG1    | 1   | 4                  | 7.56E-01 | 4                  | 7.56E-01 | 3                  | 6.65E-01 | 3                  | 6.65E-01 | 1                  | 7.00E-01 | 1                  | 7.00E-01 |
| SIX5     | 19  | 1                  | 7.20E-02 | 1                  | 7.20E-02 |                    |          |                    |          | 1                  | 6.65E-01 | 1                  | 6.65E-01 |
| GPRC6A   | 6   | 3                  | 1.18E-01 | 5                  | 2.48E-01 | 2                  | 6.75E-01 | 4                  | 1.00E+00 | 3                  | 6.65E-01 | 5                  | 7.97E-01 |
| KHNYN    | 14  | 3                  | 4.28E-01 | 3                  | 4.28E-01 | 2                  | 7.45E-01 | 2                  | 7.45E-01 | 1                  | 6.65E-01 | 1                  | 6.65E-01 |
| BEST4    | 1   | 1                  | 6.54E-02 | 1                  | 6.54E-02 |                    |          |                    |          | 1                  | 6.65E-01 | 1                  | 6.65E-01 |
| PSD3     | 8   | 1                  | 6.54E-02 | 1                  | 6.54E-02 |                    |          |                    |          | 1                  | 6.65E-01 | 1                  | 6.65E-01 |
| VWA5B2   | 3   | 1                  | 6.54E-02 | 1                  | 6.54E-02 |                    |          |                    |          | 1                  | 6.65E-01 | 1                  | 6.65E-01 |
| ACTL10   | 20  | 1                  | 6.54E-02 | 1                  | 6.54E-02 |                    |          |                    |          | 1                  | 6.65E-01 | 1                  | 6.65E-01 |
| KCNS2    | 8   | 1                  | 6.54E-02 | 1                  | 6.54E-02 |                    |          |                    |          | 1                  | 6.65E-01 | 1                  | 6.65E-01 |
| ADGRL1   | 19  | 4                  | 7.81E-01 | 4                  | 7.81E-01 | 3                  | 6.73E-01 | 3                  | 6.73E-01 | 1                  | 6.65E-01 | 1                  | 6.65E-01 |
| GDAP1    | 8   | 3                  | 3.43E-01 | 3                  | 3.43E-01 | 3                  | 6.65E-01 | 3                  | 6.65E-01 |                    |          |                    |          |
| SLC20A1  | 2   | 1                  | 8.85E-02 | 1                  | 8.85E-02 |                    |          |                    |          | 1                  | 6.65E-01 | 1                  | 6.65E-01 |
| BAMBI    | 10  | 1                  | 8.85E-02 | 1                  | 8.85E-02 |                    |          |                    |          | 1                  | 6.65E-01 | 1                  | 6.65E-01 |
| PGBD2    | 1   | 1                  | 8.85E-02 | 1                  | 8.85E-02 |                    |          |                    |          | 1                  | 6.65E-01 | 1                  | 6.65E-01 |
| ZNF669   | 1   | 3                  | 7.41E-01 | 3                  | 7.41E-01 | 3                  | 8.38E-01 | 3                  | 8.38E-01 | 1                  | 6.65E-01 | 1                  | 6.65E-01 |
| FAM110D  | 1   | 1                  | 8.85E-02 | 1                  | 8.85E-02 |                    |          |                    |          | 1                  | 6.65E-01 | 1                  | 6.65E-01 |
| TEX43    | 5   | 1                  | 8.85E-02 | 1                  | 8.85E-02 |                    |          |                    |          | 1                  | 6.65E-01 | 1                  | 6.65E-01 |
| PPIH     | 1   | 1                  | 8.85E-02 | 1                  | 8.85E-02 |                    |          |                    |          | 1                  | 6.65E-01 | 1                  | 6.65E-01 |
| NRM      | 6   | 3                  | 1.00E+00 | 3                  | 1.00E+00 | 3                  | 6.74E-01 | 3                  | 6.74E-01 | 1                  | 6.65E-01 | 1                  | 6.65E-01 |
| YAE1D1   | 7   | 2                  | 3.10E-01 | 2                  | 3.10E-01 | 2                  | 6.66E-01 | 2                  | 6.66E-01 |                    |          |                    |          |
| LZTS3    | 20  | 3                  | 3.26E-01 | 3                  | 3.26E-01 | 3                  | 6.66E-01 | 3                  | 6.66E-01 |                    |          |                    |          |
| TH       | 11  | 2                  | 5.69E-01 | 2                  | 5.69E-01 | 2                  | 6.66E-01 | 2                  | 6.66E-01 |                    |          |                    |          |
| HOOK1    | 1   | 4                  | 7.65E-01 | 4                  | 7.65E-01 | 3                  | 6.66E-01 | 3                  | 6.66E-01 | 1                  | 6.80E-01 | 1                  | 6.80E-01 |
| SLC2A2   | 3   | 2                  | 5.42E-01 | 2                  | 5.42E-01 | 2                  | 6.66E-01 | 2                  | 6.66E-01 |                    |          |                    |          |
| SNED1    | 2   | 4                  | 1.00E+00 | 4                  | 1.00E+00 | 4                  | 6.71E-01 | 4                  | 6.71E-01 | 2                  | 6.66E-01 | 2                  | 6.66E-01 |
| RNF175   | 4   | 4                  | 6.75E-01 | 4                  | 6.75E-01 | 3                  | 6.67E-01 | 3                  | 6.67E-01 | 3                  | 6.88E-01 | 3                  | 6.88E-01 |
| DRC7     | 16  | 9                  | 2.47E-01 | 9                  | 2.47E-01 | 9                  | 8.34E-01 | 9                  | 8.34E-01 | 6                  | 6.67E-01 | 6                  | 6.67E-01 |
| PNPLA3   | 22  | 2                  | 3.15E-01 | 2                  | 3.15E-01 | 2                  | 6.68E-01 | 2                  | 6.68E-01 |                    |          |                    |          |
| ONECUT3  | 19  | 3                  | 3.50E-01 | 3                  | 3.50E-01 | 3                  | 6.68E-01 | 3                  | 6.68E-01 |                    |          |                    |          |
| SLC6A4   | 17  | 1                  | 7.18E-02 | 1                  | 7.18E-02 |                    |          |                    |          | 1                  | 6.68E-01 | 1                  | 6.68E-01 |
| SIL1     | 5   | 4                  | 7.81E-01 | 4                  | 7.81E-01 | 3                  | 7.70E-01 | 3                  | 7.70E-01 | 1                  | 6.68E-01 | 1                  | 6.68E-01 |
| OR1E2    | 17  | 1                  | 7.18E-02 | 1                  | 7.18E-02 |                    |          |                    |          | 1                  | 6.68E-01 | 1                  | 6.68E-01 |
| FN3K     | 17  | 1                  | 7.18E-02 | 1                  | 7.18E-02 |                    |          |                    |          | 1                  | 6.68E-01 | 1                  | 6.68E-01 |
| GNMT     | 6   | 1                  | 7.18E-02 | 1                  | 7.18E-02 |                    |          |                    |          | 1                  | 6.68E-01 | 1                  | 6.68E-01 |
| YPEL1    | 22  | 1                  | 7.18E-02 | 1                  | 7.18E-02 |                    |          |                    |          | 1                  | 6.68E-01 | 1                  | 6.68E-01 |
| SPA17    | 11  | 1                  | 6.57E-02 | 1                  | 6.57E-02 |                    |          |                    |          | 1                  | 6.68E-01 | 1                  | 6.68E-01 |
| POLG2    | 17  | 1                  | 6.57E-02 | 1                  | 6.57E-02 |                    |          |                    |          | 1                  | 6.68E-01 | 1                  | 6.68E-01 |
| AKIP1    | 11  | 1                  | 6.57E-02 | 1                  | 6.57E-02 |                    |          |                    |          | 1                  | 6.68E-01 | 1                  | 6.68E-01 |
| CHSY1    | 15  | 2                  | 3.06E-01 | 2                  | 3.06E-01 | 1                  | 6.86E-01 | 1                  | 6.86E-01 | 1                  | 6.69E-01 | 1                  | 6.69E-01 |
| ERMARD   | 6   | 1                  | 6.10E-02 | 1                  | 6.10E-02 |                    |          |                    |          | 1                  | 6.69E-01 | 1                  | 6.69E-01 |
| AIMP1    | 4   | 1                  | 6.10E-02 | 1                  | 6.10E-02 |                    |          |                    |          | 1                  | 6.69E-01 | 1                  | 6.69E-01 |
| NCK2     | 2   | 1                  | 6.10E-02 | 1                  | 6.10E-02 |                    |          |                    |          | 1                  | 6.69E-01 | 1                  | 6.69E-01 |
| EIF2B3   | 1   | 1                  | 6.10E-02 | 1                  | 6.10E-02 |                    |          |                    |          | 1                  | 6.69E-01 | 1                  | 6.69E-01 |
| CHRM4    | 11  | 1                  | 6.10E-02 | 1                  | 6.10E-02 |                    |          |                    |          | 1                  | 6.69E-01 | 1                  | 6.69E-01 |
| CDK5     | 7   | 1                  | 6.10E-02 | 1                  | 6.10E-02 |                    |          |                    |          | 1                  | 6.69E-01 | 1                  | 6.69E-01 |
| C6       | 5   | 6                  | 2.90E-01 | 6                  | 2.90E-01 | 3                  | 7.11E-01 | 3                  | 7.11E-01 | 3                  | 6.69E-01 | 3                  | 6.69E-01 |

| SetID    | Chr | ADEH- vs NA        |          |                    |          | ADEH+ vs ADEH-     |          |                    |          | ADEH+ vs NA        |          |                    |          |
|----------|-----|--------------------|----------|--------------------|----------|--------------------|----------|--------------------|----------|--------------------|----------|--------------------|----------|
|          |     | rarenovel          |          | all                |          | rarenovel          |          | all                |          | rarenovel          |          | all                |          |
|          |     | N variants in test | p-value  | N variants in test | p-value  | N variants in test | p-value  | N variants in test | p-value  | N variants in test | p-value  | N variants in test | p-value  |
| TSHR     | 14  | 2                  | 1.56E-02 | 2                  | 1.56E-02 |                    |          |                    |          | 2                  | 6.69E-01 | 2                  | 6.69E-01 |
| ZNF280D  | 15  | 3                  | 6.69E-01 | 3                  | 6.69E-01 | 2                  | 6.69E-01 | 2                  | 6.69E-01 | 2                  | 1.00E+00 | 2                  | 1.00E+00 |
| RNF181   | 2   | 1                  | 8.35E-02 | 1                  | 8.35E-02 |                    |          |                    |          | 1                  | 6.69E-01 | 1                  | 6.69E-01 |
| TCEA1    | 8   | 1                  | 8.35E-02 | 1                  | 8.35E-02 |                    |          |                    |          | 1                  | 6.69E-01 | 1                  | 6.69E-01 |
| DDB2     | 11  | 1                  | 8.35E-02 | 1                  | 8.35E-02 |                    |          |                    |          | 1                  | 6.69E-01 | 1                  | 6.69E-01 |
| WBP1     | 2   | 1                  | 8.35E-02 | 1                  | 8.35E-02 |                    |          |                    |          | 1                  | 6.69E-01 | 1                  | 6.69E-01 |
| ZBBX     | 3   | 2                  | 8.07E-01 | 3                  | 8.07E-01 | 2                  | 6.89E-01 | 3                  | 6.89E-01 | 1                  | 6.69E-01 | 2                  | 6.69E-01 |
| IDUA     | 4   | 2                  | 8.89E-01 | 2                  | 8.89E-01 | 2                  | 6.71E-01 | 2                  | 6.71E-01 | 1                  | 6.69E-01 | 1                  | 6.69E-01 |
| AFTPH    | 2   | 3                  | 1.00E+00 | 3                  | 1.00E+00 | 3                  | 7.75E-01 | 3                  | 7.75E-01 | 1                  | 6.69E-01 | 1                  | 6.69E-01 |
| NRTN     | 19  | 1                  | 8.99E-02 | 1                  | 8.99E-02 |                    |          |                    |          | 1                  | 6.69E-01 | 1                  | 6.69E-01 |
| NODAL    | 10  | 1                  | 8.99E-02 | 1                  | 8.99E-02 |                    |          |                    |          | 1                  | 6.69E-01 | 1                  | 6.69E-01 |
| PRKAA2   | 1   | 1                  | 8.99E-02 | 1                  | 8.99E-02 |                    |          |                    |          | 1                  | 6.69E-01 | 1                  | 6.69E-01 |
| FBLN5    | 14  | 1                  | 8.99E-02 | 1                  | 8.99E-02 |                    |          |                    |          | 1                  | 6.69E-01 | 1                  | 6.69E-01 |
| SYTL1    | 1   | 1                  | 8.99E-02 | 1                  | 8.99E-02 |                    |          |                    |          | 1                  | 6.69E-01 | 1                  | 6.69E-01 |
| MACROD2  | 20  | 2                  | 1.60E-01 | 2                  | 1.60E-01 | 1                  | 1.00E+00 | 1                  | 1.00E+00 | 1                  | 6.70E-01 | 1                  | 6.70E-01 |
| OR2W1    | 6   | 1                  | 7.33E-02 | 1                  | 7.33E-02 |                    |          |                    |          | 1                  | 6.70E-01 | 1                  | 6.70E-01 |
| AES      | 19  | 1                  | 7.33E-02 | 1                  | 7.33E-02 |                    |          |                    |          | 1                  | 6.70E-01 | 1                  | 6.70E-01 |
| WDR91    | 7   | 1                  | 8.56E-02 | 1                  | 8.56E-02 |                    |          |                    |          | 1                  | 6.71E-01 | 1                  | 6.71E-01 |
| FRMD5    | 15  | 1                  | 8.56E-02 | 1                  | 8.56E-02 |                    |          |                    |          | 1                  | 6.71E-01 | 1                  | 6.71E-01 |
| OTUD4    | 4   | 1                  | 8.56E-02 | 1                  | 8.56E-02 |                    |          |                    |          | 1                  | 6.71E-01 | 1                  | 6.71E-01 |
| NPEPL1   | 20  | 1                  | 8.56E-02 | 1                  | 8.56E-02 |                    |          |                    |          | 1                  | 6.71E-01 | 1                  | 6.71E-01 |
| UPK1B    | 3   | 2                  | 5.67E-01 | 2                  | 5.67E-01 | 2                  | 6.71E-01 | 2                  | 6.71E-01 |                    |          |                    |          |
| LRRIQ1   | 12  | 5                  | 7.62E-01 | 5                  | 7.62E-01 | 4                  | 8.62E-01 | 4                  | 8.62E-01 | 1                  | 6.71E-01 | 1                  | 6.71E-01 |
| ADPRHL1  | 13  | 2                  | 2.43E-01 | 2                  | 2.43E-01 | 2                  | 1.00E+00 | 2                  | 1.00E+00 | 1                  | 6.71E-01 | 1                  | 6.71E-01 |
| HENMT1   | 1   | 3                  | 5.30E-01 | 3                  | 5.30E-01 | 3                  | 6.71E-01 | 3                  | 6.71E-01 | 1                  | 1.00E+00 | 1                  | 1.00E+00 |
| ELMOD1   | 11  | 1                  | 7.80E-02 | 1                  | 7.80E-02 |                    |          |                    |          | 1                  | 6.71E-01 | 1                  | 6.71E-01 |
| NCR1     | 19  | 1                  | 7.80E-02 | 1                  | 7.80E-02 |                    |          |                    |          | 1                  | 6.71E-01 | 1                  | 6.71E-01 |
| RBMS2    | 12  | 1                  | 7.80E-02 | 1                  | 7.80E-02 |                    |          |                    |          | 1                  | 6.71E-01 | 1                  | 6.71E-01 |
| PRKACG   | 9   | 1                  | 7.80E-02 | 1                  | 7.80E-02 |                    |          |                    |          | 1                  | 6.71E-01 | 1                  | 6.71E-01 |
| FMN1     | 15  | 7                  | 7.18E-01 | 7                  | 7.18E-01 | 6                  | 1.00E+00 | 6                  | 1.00E+00 | 6                  | 6.71E-01 | 6                  | 6.71E-01 |
| TTC26    | 7   | 2                  | 1.00E+00 | 2                  | 1.00E+00 | 2                  | 7.63E-01 | 2                  | 7.63E-01 | 1                  | 6.72E-01 | 1                  | 6.72E-01 |
| C16orf90 | 16  | 1                  | 8.38E-02 | 1                  | 8.38E-02 |                    |          |                    |          | 1                  | 6.72E-01 | 1                  | 6.72E-01 |
| POLA2    | 11  | 1                  | 8.38E-02 | 1                  | 8.38E-02 |                    |          |                    |          | 1                  | 6.72E-01 | 1                  | 6.72E-01 |
| GUCA1B   | 6   | 1                  | 8.38E-02 | 1                  | 8.38E-02 |                    |          |                    |          | 1                  | 6.72E-01 | 1                  | 6.72E-01 |
| STATH    | 4   | 1                  | 8.38E-02 | 1                  | 8.38E-02 |                    |          |                    |          | 1                  | 6.72E-01 | 1                  | 6.72E-01 |
| SRRT     | 7   | 3                  | 3.32E-01 | 3                  | 3.32E-01 | 3                  | 6.73E-01 | 3                  | 6.73E-01 |                    |          |                    |          |
| SLC25A30 | 13  | 2                  | 5.47E-01 | 2                  | 5.47E-01 | 2                  | 6.73E-01 | 2                  | 6.73E-01 |                    |          |                    |          |
| PLEKHG3  | 14  | 8                  | 5.72E-01 | 9                  | 6.22E-01 | 5                  | 1.00E+00 | 6                  | 7.64E-01 | 6                  | 6.78E-01 | 7                  | 6.73E-01 |
| ELP2     | 18  | 2                  | 5.70E-01 | 2                  | 5.70E-01 | 2                  | 6.73E-01 | 2                  | 6.73E-01 |                    |          |                    |          |
| DUS3L    | 19  | 3                  | 3.40E-01 | 3                  | 3.40E-01 | 3                  | 6.73E-01 | 3                  | 6.73E-01 |                    |          |                    |          |
| ABC6     | 2   | 8                  | 2.19E-01 | 8                  | 2.19E-01 | 7                  | 6.73E-01 | 7                  | 6.73E-01 | 5                  | 8.66E-01 | 5                  | 8.66E-01 |
| STXBP6   | 14  | 2                  | 5.37E-01 | 2                  | 5.37E-01 | 2                  | 6.73E-01 | 2                  | 6.73E-01 |                    |          |                    |          |
| SLC1A1   | 9   | 3                  | 7.54E-01 | 3                  | 7.54E-01 | 2                  | 6.83E-01 | 2                  | 6.83E-01 | 2                  | 6.74E-01 | 2                  | 6.74E-01 |
| SP2      | 17  | 2                  | 2.90E-01 | 2                  | 2.90E-01 | 2                  | 6.74E-01 | 2                  | 6.74E-01 |                    |          |                    |          |
| HARS     | 5   | 2                  | 4.89E-01 | 2                  | 4.89E-01 | 2                  | 6.74E-01 | 2                  | 6.74E-01 | 1                  | 6.87E-01 | 1                  | 6.87E-01 |
| ADRA1B   | 5   | 1                  | 7.76E-02 | 1                  | 7.76E-02 |                    |          |                    |          | 1                  | 6.74E-01 | 1                  | 6.74E-01 |
| ANKRD42  | 11  | 1                  | 7.76E-02 | 1                  | 7.76E-02 |                    |          |                    |          | 1                  | 6.74E-01 | 1                  | 6.74E-01 |
| CHRNA6   | 8   | 1                  | 7.76E-02 | 1                  | 7.76E-02 |                    |          |                    |          | 1                  | 6.74E-01 | 1                  | 6.74E-01 |



| SetID     | Chr | ADEH- vs NA        |          |                    |          | ADEH+ vs ADEH-     |          |                    |          | ADEH+ vs NA        |          |                    |          |
|-----------|-----|--------------------|----------|--------------------|----------|--------------------|----------|--------------------|----------|--------------------|----------|--------------------|----------|
|           |     | rarenovel          |          | all                |          | rarenovel          |          | all                |          | rarenovel          |          | all                |          |
|           |     | N variants in test | p-value  | N variants in test | p-value  | N variants in test | p-value  | N variants in test | p-value  | N variants in test | p-value  | N variants in test | p-value  |
| OR1A2     | 17  | 3                  | 9.13E-01 | 4                  | 9.13E-01 | 3                  | 7.19E-01 | 4                  | 7.19E-01 | 1                  | 6.74E-01 | 2                  | 6.75E-01 |
| TADA2B    | 4   | 1                  | 7.76E-02 | 1                  | 7.76E-02 |                    |          |                    |          | 1                  | 6.74E-01 | 1                  | 6.74E-01 |
| ZNF668    | 16  | 2                  | 3.08E-01 | 2                  | 3.08E-01 | 2                  | 6.75E-01 | 2                  | 6.75E-01 |                    |          |                    |          |
| GSTO1     | 10  | 1                  | 8.82E-02 | 1                  | 8.82E-02 |                    |          |                    |          | 1                  | 6.75E-01 | 1                  | 6.75E-01 |
| FOLR1     | 11  | 1                  | 8.82E-02 | 1                  | 8.82E-02 |                    |          |                    |          | 1                  | 6.75E-01 | 1                  | 6.75E-01 |
| FBXL15    | 10  | 1                  | 8.82E-02 | 1                  | 8.82E-02 |                    |          |                    |          | 1                  | 6.75E-01 | 1                  | 6.75E-01 |
| ECE1      | 1   | 1                  | 8.82E-02 | 1                  | 8.82E-02 |                    |          |                    |          | 1                  | 6.75E-01 | 1                  | 6.75E-01 |
| ARMC1     | 8   | 1                  | 8.82E-02 | 1                  | 8.82E-02 |                    |          |                    |          | 1                  | 6.75E-01 | 1                  | 6.75E-01 |
| SLC25A48  | 5   | 1                  | 8.82E-02 | 1                  | 8.82E-02 |                    |          |                    |          | 1                  | 6.75E-01 | 1                  | 6.75E-01 |
| OR1Q1     | 9   | 1                  | 8.07E-02 | 2                  | 6.78E-01 |                    |          | 1                  | 1.00E+00 | 1                  | 6.75E-01 | 2                  | 8.19E-01 |
| SKIL      | 3   | 1                  | 8.07E-02 | 1                  | 8.07E-02 |                    |          |                    |          | 1                  | 6.75E-01 | 1                  | 6.75E-01 |
| AMBN      | 4   | 3                  | 1.00E+00 | 4                  | 5.04E-01 | 3                  | 7.89E-01 | 4                  | 6.94E-01 | 1                  | 6.75E-01 | 2                  | 1.00E+00 |
| ANGPTL2   | 9   | 1                  | 8.07E-02 | 1                  | 8.07E-02 |                    |          |                    |          | 1                  | 6.75E-01 | 1                  | 6.75E-01 |
| PDE4B     | 1   | 1                  | 8.07E-02 | 1                  | 8.07E-02 |                    |          |                    |          | 1                  | 6.75E-01 | 1                  | 6.75E-01 |
| CACNG2    | 22  | 1                  | 8.07E-02 | 1                  | 8.07E-02 |                    |          |                    |          | 1                  | 6.75E-01 | 1                  | 6.75E-01 |
| CYB5B     | 16  | 1                  | 8.07E-02 | 1                  | 8.07E-02 |                    |          |                    |          | 1                  | 6.75E-01 | 1                  | 6.75E-01 |
| GNAL      | 18  | 1                  | 8.07E-02 | 1                  | 8.07E-02 |                    |          |                    |          | 1                  | 6.75E-01 | 1                  | 6.75E-01 |
| SLC1A4    | 2   | 3                  | 3.40E-01 | 3                  | 3.40E-01 | 3                  | 6.76E-01 | 3                  | 6.76E-01 |                    |          |                    |          |
| PLPP2     | 19  | 3                  | 1.00E+00 | 3                  | 1.00E+00 | 3                  | 6.76E-01 | 3                  | 6.76E-01 | 3                  | 7.40E-01 | 3                  | 7.40E-01 |
| CALHM3    | 10  | 3                  | 3.37E-01 | 3                  | 3.37E-01 | 3                  | 6.76E-01 | 3                  | 6.76E-01 |                    |          |                    |          |
| SNCAIP    | 5   | 5                  | 3.58E-01 | 5                  | 3.58E-01 | 4                  | 6.76E-01 | 4                  | 6.76E-01 | 4                  | 1.00E+00 | 4                  | 1.00E+00 |
| SV2B      | 15  | 3                  | 3.37E-01 | 3                  | 3.37E-01 | 3                  | 6.76E-01 | 3                  | 6.76E-01 |                    |          |                    |          |
| GRHL3     | 1   | 6                  | 1.00E+00 | 6                  | 1.00E+00 | 5                  | 6.76E-01 | 5                  | 6.76E-01 | 3                  | 7.70E-01 | 3                  | 7.70E-01 |
| RASGRP3   | 2   | 3                  | 3.45E-01 | 3                  | 3.45E-01 | 3                  | 6.77E-01 | 3                  | 6.77E-01 |                    |          |                    |          |
| FAM26F    | 6   |                    |          | 1                  | 4.11E-01 |                    |          | 1                  | 6.77E-01 |                    |          | 1                  | 1.00E+00 |
| HAS3      | 16  | 1                  | 6.97E-02 | 1                  | 6.97E-02 |                    |          |                    |          | 1                  | 6.77E-01 | 1                  | 6.77E-01 |
| NUP37     | 12  | 1                  | 6.97E-02 | 1                  | 6.97E-02 |                    |          |                    |          | 1                  | 6.77E-01 | 1                  | 6.77E-01 |
| LASP1     | 17  | 1                  | 6.97E-02 | 1                  | 6.97E-02 |                    |          |                    |          | 1                  | 6.77E-01 | 1                  | 6.77E-01 |
| TRAF7     | 16  | 1                  | 6.97E-02 | 1                  | 6.97E-02 |                    |          |                    |          | 1                  | 6.77E-01 | 1                  | 6.77E-01 |
| CENPL     | 1   | 1                  | 6.97E-02 | 1                  | 6.97E-02 |                    |          |                    |          | 1                  | 6.77E-01 | 1                  | 6.77E-01 |
| LPAR1     | 9   | 1                  | 6.97E-02 | 1                  | 6.97E-02 |                    |          |                    |          | 1                  | 6.77E-01 | 1                  | 6.77E-01 |
| MC4R      | 18  | 1                  | 6.97E-02 | 1                  | 6.97E-02 |                    |          |                    |          | 1                  | 6.77E-01 | 1                  | 6.77E-01 |
| RSG1      | 1   | 2                  | 3.26E-01 | 2                  | 3.26E-01 | 2                  | 6.78E-01 | 2                  | 6.78E-01 |                    |          |                    |          |
| ST3GAL3   | 1   | 2                  | 5.60E-01 | 2                  | 5.60E-01 | 2                  | 6.79E-01 | 2                  | 6.79E-01 |                    |          |                    |          |
| INF2      | 14  | 3                  | 3.13E-01 | 3                  | 3.13E-01 | 3                  | 6.79E-01 | 3                  | 6.79E-01 |                    |          |                    |          |
| CYP2C18   | 10  | 4                  | 3.42E-01 | 5                  | 3.76E-01 | 4                  | 6.82E-01 | 5                  | 6.79E-01 | 2                  | 1.00E+00 | 3                  | 1.00E+00 |
| TRIM24    | 7   | 1                  | 6.49E-02 | 1                  | 6.49E-02 |                    |          |                    |          | 1                  | 6.80E-01 | 1                  | 6.80E-01 |
| KANSL1L   | 2   | 3                  | 1.00E+00 | 3                  | 1.00E+00 | 3                  | 7.55E-01 | 3                  | 7.55E-01 | 1                  | 6.80E-01 | 1                  | 6.80E-01 |
| TROVE2    | 1   | 3                  | 9.12E-01 | 3                  | 9.12E-01 | 3                  | 7.51E-01 | 3                  | 7.51E-01 | 1                  | 6.80E-01 | 1                  | 6.80E-01 |
| C10orf131 | 10  | 1                  | 6.49E-02 | 1                  | 6.49E-02 |                    |          |                    |          | 1                  | 6.80E-01 | 1                  | 6.80E-01 |
| CUL2      | 10  | 1                  | 6.49E-02 | 1                  | 6.49E-02 |                    |          |                    |          | 1                  | 6.80E-01 | 1                  | 6.80E-01 |
| TIGD4     | 4   | 3                  | 1.00E+00 | 3                  | 1.00E+00 | 2                  | 6.80E-01 | 2                  | 6.80E-01 | 2                  | 7.86E-01 | 2                  | 7.86E-01 |
| SLC22A3   | 6   | 1                  | 8.70E-02 | 1                  | 8.70E-02 |                    |          |                    |          | 1                  | 6.80E-01 | 1                  | 6.80E-01 |
| ABCB8     | 7   | 1                  | 8.70E-02 | 2                  | 6.77E-01 |                    |          | 1                  | 1.00E+00 | 1                  | 6.80E-01 | 2                  | 7.77E-01 |
| RIPK3     | 14  | 2                  | 7.35E-01 | 3                  | 5.81E-01 | 2                  | 1.00E+00 | 3                  | 1.00E+00 | 1                  | 6.80E-01 | 2                  | 1.00E+00 |
| PARP6     | 15  | 1                  | 8.70E-02 | 1                  | 8.70E-02 |                    |          |                    |          | 1                  | 6.80E-01 | 1                  | 6.80E-01 |
| SLC5A7    | 2   | 1                  | 8.70E-02 | 1                  | 8.70E-02 |                    |          |                    |          | 1                  | 6.80E-01 | 1                  | 6.80E-01 |
| ZNF248    | 10  | 1                  | 8.70E-02 | 1                  | 8.70E-02 |                    |          |                    |          | 1                  | 6.80E-01 | 1                  | 6.80E-01 |

| SetID       | Chr | ADEH- vs NA        |          |                    |          | ADEH+ vs ADEH-     |          |                    |          | ADEH+ vs NA        |          |                    |          |
|-------------|-----|--------------------|----------|--------------------|----------|--------------------|----------|--------------------|----------|--------------------|----------|--------------------|----------|
|             |     | rarenovel          |          | all                |          | rarenovel          |          | all                |          | rarenovel          |          | all                |          |
|             |     | N variants in test | p-value  | N variants in test | p-value  | N variants in test | p-value  | N variants in test | p-value  | N variants in test | p-value  | N variants in test | p-value  |
| SPARCL1     | 4   | 2                  | 3.17E-01 | 2                  | 3.17E-01 | 2                  | 6.80E-01 | 2                  | 6.80E-01 |                    |          |                    |          |
| SYNE3       | 14  | 5                  | 7.86E-01 | 5                  | 7.86E-01 | 3                  | 1.00E+00 | 3                  | 1.00E+00 | 3                  | 6.80E-01 | 3                  | 6.80E-01 |
| SETMAR      | 3   | 3                  | 3.27E-01 | 3                  | 3.27E-01 | 3                  | 6.81E-01 | 3                  | 6.81E-01 |                    |          |                    |          |
| TLDC2       | 20  | 3                  | 4.78E-01 | 3                  | 4.78E-01 | 3                  | 8.19E-01 | 3                  | 8.19E-01 | 2                  | 6.81E-01 | 2                  | 6.81E-01 |
| ATP8B2      | 1   | 1                  | 6.38E-02 | 1                  | 6.38E-02 |                    |          |                    |          | 1                  | 6.81E-01 | 1                  | 6.81E-01 |
| RASGRP4     | 19  | 1                  | 6.38E-02 | 1                  | 6.38E-02 |                    |          |                    |          | 1                  | 6.81E-01 | 1                  | 6.81E-01 |
| HAO1        | 20  | 1                  | 6.38E-02 | 1                  | 6.38E-02 |                    |          |                    |          | 1                  | 6.81E-01 | 1                  | 6.81E-01 |
| RB1CC1      | 8   | 4                  | 2.24E-01 | 4                  | 2.24E-01 | 4                  | 6.81E-01 | 4                  | 6.81E-01 |                    |          |                    |          |
| FAM189A1    | 15  | 3                  | 3.36E-01 | 3                  | 3.36E-01 | 3                  | 6.82E-01 | 3                  | 6.82E-01 |                    |          |                    |          |
| TXNDC2      | 18  | 1                  | 6.35E-02 | 1                  | 6.35E-02 |                    |          |                    |          | 1                  | 6.82E-01 | 1                  | 6.82E-01 |
| DUS1L       | 17  | 1                  | 6.35E-02 | 1                  | 6.35E-02 |                    |          |                    |          | 1                  | 6.82E-01 | 1                  | 6.82E-01 |
| CD164       | 6   | 1                  | 6.35E-02 | 1                  | 6.35E-02 |                    |          |                    |          | 1                  | 6.82E-01 | 1                  | 6.82E-01 |
| MCAT        | 22  | 1                  | 6.35E-02 | 1                  | 6.35E-02 |                    |          |                    |          | 1                  | 6.82E-01 | 1                  | 6.82E-01 |
| CTSO        | 4   | 2                  | 5.36E-01 | 2                  | 5.36E-01 | 2                  | 6.83E-01 | 2                  | 6.83E-01 |                    |          |                    |          |
| GRID2       | 4   | 6                  | 3.14E-01 | 6                  | 3.14E-01 | 3                  | 7.68E-01 | 3                  | 7.68E-01 | 3                  | 6.83E-01 | 3                  | 6.83E-01 |
| MSLN        | 16  | 7                  | 1.78E-01 | 7                  | 1.78E-01 | 4                  | 6.83E-01 | 4                  | 6.83E-01 | 5                  | 7.93E-01 | 5                  | 7.93E-01 |
| ZNF473      | 19  | 2                  | 2.92E-01 | 2                  | 2.92E-01 | 2                  | 6.83E-01 | 2                  | 6.83E-01 | 3                  | 7.85E-01 | 3                  | 7.85E-01 |
| ALPI        | 2   | 2                  | 3.04E-01 | 2                  | 3.04E-01 | 2                  | 6.83E-01 | 2                  | 6.83E-01 |                    |          |                    |          |
| STAR3       | 17  | 2                  | 8.53E-01 | 2                  | 8.53E-01 | 1                  | 6.99E-01 | 1                  | 6.99E-01 | 2                  | 6.84E-01 | 2                  | 6.84E-01 |
| CCDC88C     | 14  | 13                 | 8.36E-01 | 13                 | 8.36E-01 | 11                 | 6.84E-01 | 11                 | 6.84E-01 | 5                  | 8.58E-01 | 5                  | 8.58E-01 |
| ACOXL       | 2   | 8                  | 8.21E-01 | 8                  | 8.21E-01 | 8                  | 6.85E-01 | 8                  | 6.85E-01 | 7                  | 7.86E-01 | 7                  | 7.86E-01 |
| OR8A1       | 11  | 1                  | 7.72E-02 | 1                  | 7.72E-02 |                    |          |                    |          | 1                  | 6.85E-01 | 1                  | 6.85E-01 |
| CLEC4E      | 12  | 1                  | 7.72E-02 | 1                  | 7.72E-02 |                    |          |                    |          | 1                  | 6.85E-01 | 1                  | 6.85E-01 |
| HHATL       | 3   | 1                  | 7.72E-02 | 1                  | 7.72E-02 |                    |          |                    |          | 1                  | 6.85E-01 | 1                  | 6.85E-01 |
| RGSL1       | 1   | 3                  | 4.59E-01 | 4                  | 3.61E-01 | 3                  | 6.85E-01 | 4                  | 1.00E+00 | 1                  | 1.00E+00 | 2                  | 8.32E-01 |
| SLC22A5     | 5   | 2                  | 7.68E-01 | 2                  | 7.68E-01 | 2                  | 1.00E+00 | 2                  | 1.00E+00 | 2                  | 6.86E-01 | 2                  | 6.86E-01 |
| TNFAIP6     | 2   | 2                  | 2.74E-01 | 2                  | 2.74E-01 | 2                  | 6.86E-01 | 2                  | 6.86E-01 | 2                  | 1.00E+00 | 2                  | 1.00E+00 |
| FAR1        | 11  | 1                  | 6.93E-01 | 1                  | 6.93E-01 | 1                  | 6.86E-01 | 1                  | 6.86E-01 |                    |          |                    |          |
| IFNW1       | 9   | 1                  | 6.93E-01 | 1                  | 6.93E-01 | 1                  | 6.86E-01 | 1                  | 6.86E-01 |                    |          |                    |          |
| A4GALT      | 22  | 1                  | 6.93E-01 | 1                  | 6.93E-01 | 1                  | 6.86E-01 | 1                  | 6.86E-01 |                    |          |                    |          |
| MRPL17      | 11  | 1                  | 6.93E-01 | 1                  | 6.93E-01 | 1                  | 6.86E-01 | 1                  | 6.86E-01 |                    |          |                    |          |
| NMI         | 2   | 1                  | 6.93E-01 | 1                  | 6.93E-01 | 1                  | 6.86E-01 | 1                  | 6.86E-01 |                    |          |                    |          |
| MSH4        | 1   | 3                  | 6.72E-01 | 3                  | 6.72E-01 | 3                  | 6.86E-01 | 3                  | 6.86E-01 | 1                  | 1.00E+00 | 1                  | 1.00E+00 |
| TRIM9       | 14  | 3                  | 3.37E-01 | 3                  | 3.37E-01 | 3                  | 6.87E-01 | 3                  | 6.87E-01 |                    |          |                    |          |
| PHKB        | 16  | 10                 | 1.14E-01 | 10                 | 1.14E-01 | 6                  | 7.03E-01 | 6                  | 7.03E-01 | 6                  | 6.87E-01 | 6                  | 6.87E-01 |
| KDM2B       | 12  | 3                  | 3.38E-01 | 3                  | 3.38E-01 | 3                  | 6.88E-01 | 3                  | 6.88E-01 |                    |          |                    |          |
| OCEL1       | 19  | 4                  | 2.27E-01 | 5                  | 6.75E-02 | 1                  | 1.00E+00 | 2                  | 1.00E+00 | 4                  | 6.88E-01 | 5                  | 8.52E-01 |
| SIRPB1      | 20  | 2                  | 1.00E+00 | 2                  | 1.00E+00 | 2                  | 7.21E-01 | 2                  | 7.21E-01 | 1                  | 6.89E-01 | 1                  | 6.89E-01 |
| SPOPL       | 2   | 1                  | 6.22E-02 | 1                  | 6.22E-02 |                    |          |                    |          | 1                  | 6.89E-01 | 1                  | 6.89E-01 |
| SRPRB       | 3   | 2                  | 3.16E-01 | 2                  | 3.16E-01 | 2                  | 6.89E-01 | 2                  | 6.89E-01 |                    |          |                    |          |
| C4orf19     | 4   | 2                  | 3.22E-01 | 2                  | 3.22E-01 | 2                  | 6.90E-01 | 2                  | 6.90E-01 |                    |          |                    |          |
| TNRC6A      | 16  | 3                  | 3.25E-01 | 3                  | 3.25E-01 | 3                  | 6.90E-01 | 3                  | 6.90E-01 |                    |          |                    |          |
| FAM47E-STBD | 4   |                    |          | 1                  | 7.19E-01 |                    |          | 1                  | 1.00E+00 |                    |          | 1                  | 6.90E-01 |
| FAM47E      | 4   |                    |          | 1                  | 7.19E-01 |                    |          | 1                  | 1.00E+00 |                    |          | 1                  | 6.90E-01 |
| MMP8        | 11  | 2                  | 6.30E-01 | 2                  | 6.30E-01 | 2                  | 1.00E+00 | 2                  | 1.00E+00 | 1                  | 6.90E-01 | 1                  | 6.90E-01 |
| SLC26A9     | 1   | 2                  | 7.01E-01 | 2                  | 7.01E-01 | 1                  | 1.00E+00 | 1                  | 1.00E+00 | 2                  | 6.90E-01 | 2                  | 6.90E-01 |
| FMNL1       | 17  | 3                  | 3.35E-01 | 3                  | 3.35E-01 | 3                  | 6.91E-01 | 3                  | 6.91E-01 |                    |          |                    |          |
| TMC5        | 16  | 2                  | 2.89E-01 | 2                  | 2.89E-01 | 2                  | 6.92E-01 | 2                  | 6.92E-01 |                    |          |                    |          |

| SetID    | Chr | ADEH- vs NA        |          |                    |          | ADEH+ vs ADEH-     |          |                    |          | ADEH+ vs NA        |          |                    |          |
|----------|-----|--------------------|----------|--------------------|----------|--------------------|----------|--------------------|----------|--------------------|----------|--------------------|----------|
|          |     | rare novel         |          | all                |          | rare novel         |          | all                |          | rare novel         |          | all                |          |
|          |     | N variants in test | p-value  | N variants in test | p-value  | N variants in test | p-value  | N variants in test | p-value  | N variants in test | p-value  | N variants in test | p-value  |
| UPB1     | 22  | 3                  | 3.36E-01 | 3                  | 3.36E-01 | 3                  | 6.92E-01 | 3                  | 6.92E-01 |                    |          |                    |          |
| EIF4G3   | 1   | 2                  | 3.21E-01 | 2                  | 3.21E-01 | 2                  | 6.92E-01 | 2                  | 6.92E-01 |                    |          |                    |          |
| SRRM5    | 19  | 1                  | 8.09E-02 | 1                  | 8.09E-02 |                    |          |                    |          | 1                  | 6.92E-01 | 1                  | 6.92E-01 |
| PYCR1    | 17  | 1                  | 8.09E-02 | 1                  | 8.09E-02 |                    |          |                    |          | 1                  | 6.92E-01 | 1                  | 6.92E-01 |
| THSD4    | 15  | 3                  | 3.21E-01 | 3                  | 3.21E-01 | 3                  | 6.93E-01 | 3                  | 6.93E-01 |                    |          |                    |          |
| FANCL    | 2   | 2                  | 3.25E-01 | 2                  | 3.25E-01 | 2                  | 6.93E-01 | 2                  | 6.93E-01 |                    |          |                    |          |
| C3orf20  | 3   | 2                  | 3.26E-01 | 3                  | 2.70E-01 | 2                  | 6.93E-01 | 3                  | 1.00E+00 |                    |          | 1                  | 1.00E+00 |
| TIA1     | 2   | 2                  | 3.21E-01 | 2                  | 3.21E-01 | 2                  | 6.93E-01 | 2                  | 6.93E-01 |                    |          |                    |          |
| ZNF319   | 16  | 2                  | 3.27E-01 | 2                  | 3.27E-01 | 2                  | 6.94E-01 | 2                  | 6.94E-01 |                    |          |                    |          |
| KRT78    | 12  | 3                  | 3.33E-01 | 4                  | 3.33E-01 | 3                  | 7.84E-01 | 4                  | 7.84E-01 |                    |          | 1                  | 6.94E-01 |
| FASTKD2  | 2   | 3                  | 3.26E-01 | 3                  | 3.26E-01 | 3                  | 6.94E-01 | 3                  | 6.94E-01 |                    |          |                    |          |
| TAF3     | 10  | 2                  | 3.16E-01 | 2                  | 3.16E-01 | 2                  | 6.94E-01 | 2                  | 6.94E-01 |                    |          |                    |          |
| TIMD4    | 5   | 2                  | 5.49E-01 | 2                  | 5.49E-01 | 2                  | 6.95E-01 | 2                  | 6.95E-01 |                    |          |                    |          |
| TOP3A    | 17  | 5                  | 2.14E-01 | 5                  | 2.14E-01 | 2                  | 7.02E-01 | 2                  | 7.02E-01 | 4                  | 6.95E-01 | 4                  | 6.95E-01 |
| OPTC     | 1   | 3                  | 6.71E-01 | 3                  | 6.71E-01 | 3                  | 6.95E-01 | 3                  | 6.95E-01 | 1                  | 1.00E+00 | 1                  | 1.00E+00 |
| ZRANB2   | 1   | 3                  | 3.31E-01 | 3                  | 3.31E-01 | 3                  | 6.95E-01 | 3                  | 6.95E-01 |                    |          |                    |          |
| NHLRC2   | 10  | 2                  | 9.09E-01 | 2                  | 9.09E-01 | 2                  | 7.01E-01 | 2                  | 7.01E-01 | 1                  | 6.96E-01 | 1                  | 6.96E-01 |
| VWCE     | 11  | 1                  | 7.92E-02 | 1                  | 7.92E-02 |                    |          |                    |          | 1                  | 6.96E-01 | 1                  | 6.96E-01 |
| FAM91A1  | 8   | 1                  | 7.92E-02 | 1                  | 7.92E-02 |                    |          |                    |          | 1                  | 6.96E-01 | 1                  | 6.96E-01 |
| AGTRAP   | 1   | 1                  | 7.92E-02 | 1                  | 7.92E-02 |                    |          |                    |          | 1                  | 6.96E-01 | 1                  | 6.96E-01 |
| ENSA     | 1   | 1                  | 7.92E-02 | 1                  | 7.92E-02 |                    |          |                    |          | 1                  | 6.96E-01 | 1                  | 6.96E-01 |
| OR13C8   | 9   | 2                  | 5.49E-01 | 2                  | 5.49E-01 | 2                  | 6.96E-01 | 2                  | 6.96E-01 |                    |          |                    |          |
| BAZ1A    | 14  | 3                  | 3.34E-01 | 3                  | 3.34E-01 | 3                  | 6.97E-01 | 3                  | 6.97E-01 |                    |          |                    |          |
| SMO      | 7   | 3                  | 3.33E-01 | 3                  | 3.33E-01 | 3                  | 6.98E-01 | 3                  | 6.98E-01 |                    |          |                    |          |
| FBXO10   | 9   | 1                  | 9.09E-02 | 1                  | 9.09E-02 |                    |          |                    |          | 1                  | 6.98E-01 | 1                  | 6.98E-01 |
| ZNF43    | 19  | 1                  | 9.09E-02 | 1                  | 9.09E-02 |                    |          |                    |          | 1                  | 6.98E-01 | 1                  | 6.98E-01 |
| CEACAM19 | 19  | 1                  | 9.09E-02 | 1                  | 9.09E-02 |                    |          |                    |          | 1                  | 6.98E-01 | 1                  | 6.98E-01 |
| DSCAM    | 21  | 3                  | 5.12E-01 | 3                  | 5.12E-01 | 2                  | 7.58E-01 | 2                  | 7.58E-01 | 1                  | 6.98E-01 | 1                  | 6.98E-01 |
| GLT8D1   | 3   | 1                  | 9.09E-02 | 1                  | 9.09E-02 |                    |          |                    |          | 1                  | 6.98E-01 | 1                  | 6.98E-01 |
| COX14    | 12  | 1                  | 9.09E-02 | 1                  | 9.09E-02 |                    |          |                    |          | 1                  | 6.98E-01 | 1                  | 6.98E-01 |
| FAM150A  | 8   | 1                  | 9.09E-02 | 1                  | 9.09E-02 |                    |          |                    |          | 1                  | 6.98E-01 | 1                  | 6.98E-01 |
| PSMD1    | 2   | 1                  | 8.99E-02 | 1                  | 8.99E-02 |                    |          |                    |          | 1                  | 6.98E-01 | 1                  | 6.98E-01 |
| PRSS58   | 7   | 1                  | 8.99E-02 | 1                  | 8.99E-02 |                    |          |                    |          | 1                  | 6.98E-01 | 1                  | 6.98E-01 |
| TMEM88   | 17  | 1                  | 8.99E-02 | 1                  | 8.99E-02 |                    |          |                    |          | 1                  | 6.98E-01 | 1                  | 6.98E-01 |
| SRRD     | 22  | 1                  | 8.99E-02 | 1                  | 8.99E-02 |                    |          |                    |          | 1                  | 6.98E-01 | 1                  | 6.98E-01 |
| BTD      | 3   | 3                  | 3.58E-01 | 3                  | 3.58E-01 | 3                  | 6.98E-01 | 3                  | 6.98E-01 | 1                  | 1.00E+00 | 1                  | 1.00E+00 |
| RIC3     | 11  | 4                  | 4.86E-01 | 4                  | 4.86E-01 | 4                  | 6.99E-01 | 4                  | 6.99E-01 | 3                  | 1.00E+00 | 3                  | 1.00E+00 |
| SLC26A2  | 5   | 5                  | 1.00E+00 | 5                  | 1.00E+00 | 4                  | 7.10E-01 | 4                  | 7.10E-01 | 4                  | 7.00E-01 | 4                  | 7.00E-01 |
| MAVS     | 20  | 3                  | 3.31E-01 | 3                  | 3.31E-01 | 3                  | 7.00E-01 | 3                  | 7.00E-01 |                    |          |                    |          |
| HERPUD1  | 16  | 1                  | 6.43E-02 | 1                  | 6.43E-02 |                    |          |                    |          | 1                  | 7.00E-01 | 1                  | 7.00E-01 |
| RSPO4    | 20  | 1                  | 6.43E-02 | 1                  | 6.43E-02 |                    |          |                    |          | 1                  | 7.00E-01 | 1                  | 7.00E-01 |
| MMP11    | 22  | 2                  | 1.00E+00 | 2                  | 1.00E+00 | 2                  | 7.76E-01 | 2                  | 7.76E-01 | 1                  | 7.00E-01 | 1                  | 7.00E-01 |
| NCKAP1L  | 12  | 1                  | 6.43E-02 | 1                  | 6.43E-02 |                    |          |                    |          | 1                  | 7.00E-01 | 1                  | 7.00E-01 |
| DEFB126  | 20  | 1                  | 6.43E-02 | 1                  | 6.43E-02 |                    |          |                    |          | 1                  | 7.00E-01 | 1                  | 7.00E-01 |
| TEC      | 4   | 1                  | 6.43E-02 | 1                  | 6.43E-02 |                    |          |                    |          | 1                  | 7.00E-01 | 1                  | 7.00E-01 |
| CYP2S1   | 19  | 3                  | 2.13E-01 | 3                  | 2.13E-01 | 3                  | 7.00E-01 | 3                  | 7.00E-01 |                    |          |                    |          |
| HIVEP2   | 6   | 4                  | 1.65E-01 | 4                  | 1.65E-01 | 2                  | 1.00E+00 | 2                  | 1.00E+00 | 3                  | 7.00E-01 | 3                  | 7.00E-01 |
| RABEPK   | 9   | 2                  | 3.23E-01 | 2                  | 3.23E-01 | 2                  | 7.01E-01 | 2                  | 7.01E-01 |                    |          |                    |          |

| SetID     | Chr | ADEH- vs NA        |          |                    |          | ADEH+ vs ADEH-     |          |                    |          | ADEH+ vs NA        |          |                    |          |
|-----------|-----|--------------------|----------|--------------------|----------|--------------------|----------|--------------------|----------|--------------------|----------|--------------------|----------|
|           |     | rarenovel          |          | all                |          | rarenovel          |          | all                |          | rarenovel          |          | all                |          |
|           |     | N variants in test | p-value  | N variants in test | p-value  | N variants in test | p-value  | N variants in test | p-value  | N variants in test | p-value  | N variants in test | p-value  |
| CUTA      | 6   | 1                  | 1.56E-01 | 1                  | 1.56E-01 | 1                  | 7.01E-01 | 1                  | 7.01E-01 | 1                  | 1.00E+00 | 1                  | 1.00E+00 |
| XDH       | 2   | 15                 | 6.29E-01 | 15                 | 6.29E-01 | 8                  | 8.24E-01 | 8                  | 8.24E-01 | 9                  | 7.02E-01 | 9                  | 7.02E-01 |
| CLEC4C    | 12  | 1                  | 6.51E-02 | 1                  | 6.51E-02 |                    |          |                    |          | 1                  | 7.02E-01 | 1                  | 7.02E-01 |
| AZIN2     | 1   | 2                  | 1.00E+00 | 2                  | 1.00E+00 | 2                  | 7.07E-01 | 2                  | 7.07E-01 | 1                  | 7.02E-01 | 1                  | 7.02E-01 |
| TRPC3     | 4   | 1                  | 6.51E-02 | 1                  | 6.51E-02 |                    |          |                    |          | 1                  | 7.02E-01 | 1                  | 7.02E-01 |
| RAPGEF2   | 4   | 1                  | 7.97E-02 | 1                  | 7.97E-02 |                    |          |                    |          | 1                  | 7.02E-01 | 1                  | 7.02E-01 |
| TOPBP1    | 3   | 1                  | 7.97E-02 | 1                  | 7.97E-02 |                    |          |                    |          | 1                  | 7.02E-01 | 1                  | 7.02E-01 |
| KLHDC8B   | 3   | 1                  | 7.97E-02 | 1                  | 7.97E-02 |                    |          |                    |          | 1                  | 7.02E-01 | 1                  | 7.02E-01 |
| TMEM175   | 4   | 4                  | 5.55E-01 | 4                  | 5.55E-01 | 4                  | 8.54E-01 | 4                  | 8.54E-01 | 3                  | 7.02E-01 | 3                  | 7.02E-01 |
| TPMT      | 6   | 5                  | 6.54E-01 | 5                  | 6.54E-01 | 4                  | 7.02E-01 | 4                  | 7.02E-01 | 3                  | 1.00E+00 | 3                  | 1.00E+00 |
| PPFIA2    | 12  | 3                  | 6.28E-01 | 3                  | 6.28E-01 | 3                  | 7.77E-01 | 3                  | 7.77E-01 | 2                  | 7.03E-01 | 2                  | 7.03E-01 |
| LBP       | 20  | 3                  | 1.59E-02 | 4                  | 1.78E-02 | 3                  | 1.00E+00 | 4                  | 1.00E+00 | 3                  | 7.03E-01 | 4                  | 7.59E-01 |
| OR2AG1    | 11  | 2                  | 3.25E-01 | 2                  | 3.25E-01 | 2                  | 7.03E-01 | 2                  | 7.03E-01 |                    |          |                    |          |
| APBA3     | 19  | 12                 | 6.71E-01 | 12                 | 6.71E-01 | 9                  | 7.46E-01 | 9                  | 7.46E-01 | 6                  | 7.03E-01 | 6                  | 7.03E-01 |
| SCAF8     | 6   | 2                  | 3.13E-01 | 2                  | 3.13E-01 | 2                  | 7.03E-01 | 2                  | 7.03E-01 |                    |          |                    |          |
| DOK7      | 4   | 8                  | 1.00E+00 | 8                  | 1.00E+00 | 6                  | 7.04E-01 | 6                  | 7.04E-01 | 4                  | 1.00E+00 | 4                  | 1.00E+00 |
| ADGRG5    | 16  | 4                  | 5.38E-01 | 4                  | 5.38E-01 | 3                  | 1.00E+00 | 3                  | 1.00E+00 | 2                  | 7.04E-01 | 2                  | 7.04E-01 |
| HPS1      | 10  | 5                  | 6.96E-01 | 5                  | 6.96E-01 | 4                  | 1.00E+00 | 4                  | 1.00E+00 | 3                  | 7.04E-01 | 3                  | 7.04E-01 |
| PCYOX1L   | 5   | 2                  | 3.26E-01 | 2                  | 3.26E-01 | 2                  | 7.05E-01 | 2                  | 7.05E-01 |                    |          |                    |          |
| SOX6      | 11  | 2                  | 3.30E-01 | 2                  | 3.30E-01 | 2                  | 7.06E-01 | 2                  | 7.06E-01 |                    |          |                    |          |
| MKL1      | 22  | 2                  | 3.25E-01 | 2                  | 3.25E-01 | 2                  | 7.06E-01 | 2                  | 7.06E-01 |                    |          |                    |          |
| SDK1      | 7   | 11                 | 3.63E-01 | 11                 | 3.63E-01 | 6                  | 7.06E-01 | 6                  | 7.06E-01 | 7                  | 7.51E-01 | 7                  | 7.51E-01 |
| NT5DC2    | 3   | 2                  | 3.28E-01 | 2                  | 3.28E-01 | 2                  | 7.06E-01 | 2                  | 7.06E-01 |                    |          |                    |          |
| SLC5A4    | 22  | 4                  | 4.37E-01 | 4                  | 4.37E-01 | 4                  | 1.00E+00 | 4                  | 1.00E+00 | 3                  | 7.07E-01 | 3                  | 7.07E-01 |
| MED13L    | 12  | 2                  | 3.17E-01 | 2                  | 3.17E-01 | 2                  | 7.07E-01 | 2                  | 7.07E-01 |                    |          |                    |          |
| PRR11     | 17  | 2                  | 3.02E-01 | 2                  | 3.02E-01 | 2                  | 7.08E-01 | 2                  | 7.08E-01 |                    |          |                    |          |
| TG        | 8   | 20                 | 6.30E-01 | 20                 | 6.30E-01 | 16                 | 7.08E-01 | 16                 | 7.08E-01 | 9                  | 8.89E-01 | 9                  | 8.89E-01 |
| MICALCL   | 11  | 6                  | 3.23E-01 | 6                  | 3.23E-01 | 5                  | 1.00E+00 | 5                  | 1.00E+00 | 4                  | 7.09E-01 | 4                  | 7.09E-01 |
| ABL2      | 1   | 3                  | 2.72E-01 | 3                  | 2.72E-01 | 2                  | 1.00E+00 | 2                  | 1.00E+00 | 2                  | 7.09E-01 | 2                  | 7.09E-01 |
| TYMSOS    | 18  | 2                  | 6.15E-01 | 2                  | 6.15E-01 | 1                  | 7.09E-01 | 1                  | 7.09E-01 | 2                  | 1.00E+00 | 2                  | 1.00E+00 |
| POLR3D    | 8   | 2                  | 2.79E-01 | 2                  | 2.79E-01 | 2                  | 7.11E-01 | 2                  | 7.11E-01 |                    |          |                    |          |
| GLIS3     | 9   | 6                  | 8.06E-02 | 6                  | 8.06E-02 | 6                  | 7.79E-01 | 6                  | 7.79E-01 | 2                  | 7.12E-01 | 2                  | 7.12E-01 |
| SLC44A1   | 9   | 2                  | 3.17E-01 | 2                  | 3.17E-01 | 2                  | 7.12E-01 | 2                  | 7.12E-01 |                    |          |                    |          |
| PPL       | 16  | 9                  | 1.00E+00 | 10                 | 5.78E-01 | 7                  | 7.13E-01 | 8                  | 7.77E-01 | 6                  | 9.06E-01 | 7                  | 7.42E-01 |
| TRIT1     | 1   | 3                  | 3.42E-01 | 3                  | 3.42E-01 | 3                  | 7.14E-01 | 3                  | 7.14E-01 |                    |          |                    |          |
| DACT1     | 14  | 2                  | 3.13E-01 | 2                  | 3.13E-01 | 2                  | 7.14E-01 | 2                  | 7.14E-01 |                    |          |                    |          |
| NID2      | 14  | 10                 | 7.73E-01 | 10                 | 7.73E-01 | 9                  | 1.00E+00 | 9                  | 1.00E+00 | 6                  | 7.14E-01 | 6                  | 7.14E-01 |
| PTPRS     | 19  | 9                  | 2.10E-01 | 9                  | 2.10E-01 | 4                  | 1.00E+00 | 4                  | 1.00E+00 | 7                  | 7.16E-01 | 7                  | 7.16E-01 |
| MOS       | 8   | 2                  | 3.19E-01 | 3                  | 3.16E-01 | 2                  | 7.16E-01 | 3                  | 7.29E-01 |                    |          | 1                  | 1.00E+00 |
| LOXHD1    | 18  | 13                 | 3.85E-01 | 13                 | 3.85E-01 | 10                 | 1.00E+00 | 10                 | 1.00E+00 | 7                  | 7.17E-01 | 7                  | 7.17E-01 |
| MRPS27    | 5   | 1                  | 7.30E-01 | 1                  | 7.30E-01 | 1                  | 1.00E+00 | 1                  | 1.00E+00 | 1                  | 7.17E-01 | 1                  | 7.17E-01 |
| PI16      | 6   | 2                  | 7.61E-01 | 2                  | 7.61E-01 | 2                  | 1.00E+00 | 2                  | 1.00E+00 | 2                  | 7.17E-01 | 2                  | 7.17E-01 |
| DBH       | 9   | 5                  | 7.40E-01 | 5                  | 7.40E-01 | 4                  | 7.62E-01 | 4                  | 7.62E-01 | 4                  | 7.17E-01 | 4                  | 7.17E-01 |
| DNASE1L3  | 3   |                    |          | 1                  | 4.64E-01 |                    |          | 1                  | 1.00E+00 |                    |          | 1                  | 7.18E-01 |
| PLSCR4    | 3   | 2                  | 3.38E-01 | 2                  | 3.38E-01 | 2                  | 7.19E-01 | 2                  | 7.19E-01 |                    |          |                    |          |
| LMOD3     | 3   | 9                  | 7.72E-01 | 9                  | 7.72E-01 | 7                  | 7.55E-01 | 7                  | 7.55E-01 | 7                  | 7.19E-01 | 7                  | 7.19E-01 |
| LOC113230 | 19  | 3                  | 8.39E-01 | 3                  | 8.39E-01 | 3                  | 7.20E-01 | 3                  | 7.20E-01 | 3                  | 1.00E+00 | 3                  | 1.00E+00 |
| IFNB1     | 9   | 3                  | 3.45E-01 | 3                  | 3.45E-01 | 3                  | 7.20E-01 | 3                  | 7.20E-01 |                    |          |                    |          |

| SetID     | Chr | ADEH- vs NA        |          |                    |          | ADEH+ vs ADEH-     |          |                    |          | ADEH+ vs NA        |          |                    |          |
|-----------|-----|--------------------|----------|--------------------|----------|--------------------|----------|--------------------|----------|--------------------|----------|--------------------|----------|
|           |     | rarenovel          |          | all                |          | rarenovel          |          | all                |          | rarenovel          |          | all                |          |
|           |     | N variants in test | p-value  | N variants in test | p-value  | N variants in test | p-value  | N variants in test | p-value  | N variants in test | p-value  | N variants in test | p-value  |
| PIDD1     | 11  | 6                  | 4.70E-01 | 6                  | 4.70E-01 | 4                  | 1.00E+00 | 4                  | 1.00E+00 | 4                  | 7.22E-01 | 4                  | 7.22E-01 |
| BCO2      | 11  | 6                  | 4.97E-01 | 6                  | 4.97E-01 | 5                  | 1.00E+00 | 5                  | 1.00E+00 | 4                  | 7.23E-01 | 4                  | 7.23E-01 |
| PRMT9     | 4   | 2                  | 3.09E-01 | 2                  | 3.09E-01 | 2                  | 7.23E-01 | 2                  | 7.23E-01 |                    |          |                    |          |
| ZNF839    | 14  | 2                  | 3.25E-01 | 2                  | 3.25E-01 | 2                  | 7.24E-01 | 2                  | 7.24E-01 |                    |          |                    |          |
| KRTAP19-2 | 21  | 2                  | 3.26E-01 | 2                  | 3.26E-01 | 2                  | 7.24E-01 | 2                  | 7.24E-01 |                    |          |                    |          |
| STAC3     | 12  | 2                  | 3.07E-01 | 2                  | 3.07E-01 | 2                  | 7.25E-01 | 2                  | 7.25E-01 |                    |          |                    |          |
| CFHR2     | 1   | 2                  | 1.00E+00 | 2                  | 1.00E+00 | 2                  | 1.00E+00 | 2                  | 1.00E+00 | 2                  | 7.25E-01 | 2                  | 7.25E-01 |
| CDK13     | 7   | 5                  | 8.14E-01 | 5                  | 8.14E-01 | 4                  | 7.25E-01 | 4                  | 7.25E-01 | 3                  | 1.00E+00 | 3                  | 1.00E+00 |
| ITGA6     | 2   | 2                  | 3.27E-01 | 2                  | 3.27E-01 | 2                  | 7.27E-01 | 2                  | 7.27E-01 |                    |          |                    |          |
| PRMT3     | 11  | 4                  | 2.22E-01 | 4                  | 2.22E-01 | 4                  | 7.27E-01 | 4                  | 7.27E-01 |                    |          |                    |          |
| ANKRD12   | 18  | 3                  | 3.35E-01 | 3                  | 3.35E-01 | 3                  | 7.28E-01 | 3                  | 7.28E-01 |                    |          |                    |          |
| ANO4      | 12  | 2                  | 4.40E-01 | 2                  | 4.40E-01 | 2                  | 1.00E+00 | 2                  | 1.00E+00 | 1                  | 7.30E-01 | 1                  | 7.30E-01 |
| ARHGEF10  | 8   | 2                  | 3.17E-01 | 2                  | 3.17E-01 | 2                  | 7.30E-01 | 2                  | 7.30E-01 |                    |          |                    |          |
| ZNF93     | 19  | 3                  | 3.48E-01 | 3                  | 3.48E-01 | 3                  | 7.31E-01 | 3                  | 7.31E-01 |                    |          |                    |          |
| FAM114A1  | 4   | 2                  | 3.29E-01 | 2                  | 3.29E-01 | 2                  | 7.31E-01 | 2                  | 7.31E-01 |                    |          |                    |          |
| SCAF4     | 21  | 3                  | 3.36E-01 | 3                  | 3.36E-01 | 3                  | 7.31E-01 | 3                  | 7.31E-01 |                    |          |                    |          |
| TRHDE     | 12  | 2                  | 2.77E-01 | 2                  | 2.77E-01 | 2                  | 7.32E-01 | 2                  | 7.32E-01 |                    |          |                    |          |
| TBC1D2    | 9   | 3                  | 1.00E+00 | 3                  | 1.00E+00 | 2                  | 1.00E+00 | 2                  | 1.00E+00 | 3                  | 7.32E-01 | 3                  | 7.32E-01 |
| GYG1      | 3   | 2                  | 2.99E-01 | 2                  | 2.99E-01 | 2                  | 7.32E-01 | 2                  | 7.32E-01 |                    |          |                    |          |
| UBE3B     | 12  | 2                  | 3.24E-01 | 2                  | 3.24E-01 | 2                  | 7.33E-01 | 2                  | 7.33E-01 |                    |          |                    |          |
| ERMN      | 2   | 2                  | 3.29E-01 | 2                  | 3.29E-01 | 2                  | 7.33E-01 | 2                  | 7.33E-01 |                    |          |                    |          |
| MYOM2     | 8   | 20                 | 6.16E-01 | 21                 | 6.13E-01 | 19                 | 7.41E-01 | 20                 | 7.34E-01 | 6                  | 1.00E+00 | 7                  | 1.00E+00 |
| SPAG5     | 17  | 6                  | 3.32E-01 | 6                  | 3.32E-01 | 5                  | 7.35E-01 | 5                  | 7.35E-01 | 4                  | 1.00E+00 | 4                  | 1.00E+00 |
| OR4K17    | 14  |                    |          | 1                  | 7.22E-01 |                    |          | 1                  | 8.49E-01 |                    |          | 1                  | 7.35E-01 |
| ZNF707    | 8   | 2                  | 3.17E-01 | 2                  | 3.17E-01 | 2                  | 7.35E-01 | 2                  | 7.35E-01 |                    |          |                    |          |
| PCDHB6    | 5   | 3                  | 3.38E-01 | 3                  | 3.38E-01 | 3                  | 7.35E-01 | 3                  | 7.35E-01 |                    |          |                    |          |
| TSC22D1   | 13  | 2                  | 3.23E-01 | 2                  | 3.23E-01 | 2                  | 7.36E-01 | 2                  | 7.36E-01 |                    |          |                    |          |
| LYPLAL1   | 1   | 2                  | 3.19E-01 | 2                  | 3.19E-01 | 2                  | 7.37E-01 | 2                  | 7.37E-01 |                    |          |                    |          |
| PARP12    | 7   | 1                  | 7.70E-01 | 1                  | 7.70E-01 | 1                  | 7.37E-01 | 1                  | 7.37E-01 | 1                  | 1.00E+00 | 1                  | 1.00E+00 |
| SLC22A2   | 6   | 2                  | 3.11E-01 | 2                  | 3.11E-01 | 2                  | 7.38E-01 | 2                  | 7.38E-01 |                    |          |                    |          |
| PDLIM2    | 8   | 3                  | 3.35E-01 | 3                  | 3.35E-01 | 3                  | 7.38E-01 | 3                  | 7.38E-01 |                    |          |                    |          |
| REG3G     | 2   | 2                  | 3.22E-01 | 2                  | 3.22E-01 | 2                  | 7.38E-01 | 2                  | 7.38E-01 |                    |          |                    |          |
| NCKAP5L   | 12  | 3                  | 3.28E-01 | 3                  | 3.28E-01 | 3                  | 7.39E-01 | 3                  | 7.39E-01 |                    |          |                    |          |
| TIAM1     | 21  | 4                  | 4.26E-01 | 4                  | 4.26E-01 | 4                  | 1.00E+00 | 4                  | 1.00E+00 | 3                  | 7.39E-01 | 3                  | 7.39E-01 |
| GJB4      | 1   | 9                  | 4.87E-01 | 9                  | 4.87E-01 | 7                  | 1.00E+00 | 7                  | 1.00E+00 | 7                  | 7.40E-01 | 7                  | 7.40E-01 |
| LGALS8    | 1   | 3                  | 3.01E-01 | 3                  | 3.01E-01 | 3                  | 7.41E-01 | 3                  | 7.41E-01 | 1                  | 1.00E+00 | 1                  | 1.00E+00 |
| PACSIN2   | 22  | 2                  | 3.20E-01 | 2                  | 3.20E-01 | 2                  | 7.41E-01 | 2                  | 7.41E-01 |                    |          |                    |          |
| TAPT1     | 4   | 2                  | 3.19E-01 | 2                  | 3.19E-01 | 2                  | 7.42E-01 | 2                  | 7.42E-01 |                    |          |                    |          |
| CFAP157   | 9   | 2                  | 3.14E-01 | 2                  | 3.14E-01 | 2                  | 7.42E-01 | 2                  | 7.42E-01 |                    |          |                    |          |
| LRRC69    | 8   | 3                  | 3.36E-01 | 3                  | 3.36E-01 | 3                  | 7.42E-01 | 3                  | 7.42E-01 |                    |          |                    |          |
| TYK2      | 19  | 8                  | 2.35E-01 | 9                  | 2.62E-01 | 5                  | 1.00E+00 | 6                  | 7.42E-01 | 7                  | 8.05E-01 | 8                  | 1.00E+00 |
| PHLPP2    | 16  | 3                  | 2.98E-01 | 4                  | 3.35E-01 | 3                  | 7.44E-01 | 4                  | 7.60E-01 |                    |          | 1                  | 1.00E+00 |
| SLC2A5    | 1   | 2                  | 3.32E-01 | 2                  | 3.32E-01 | 2                  | 7.44E-01 | 2                  | 7.44E-01 |                    |          |                    |          |
| GALNT14   | 2   | 3                  | 3.38E-01 | 3                  | 3.38E-01 | 3                  | 7.44E-01 | 3                  | 7.44E-01 |                    |          |                    |          |
| TINAG     | 6   | 3                  | 3.45E-01 | 3                  | 3.45E-01 | 3                  | 7.46E-01 | 3                  | 7.46E-01 |                    |          |                    |          |
| ADCY2     | 5   | 2                  | 3.28E-01 | 2                  | 3.28E-01 | 2                  | 7.47E-01 | 2                  | 7.47E-01 |                    |          |                    |          |
| PLEK      | 2   | 3                  | 3.28E-01 | 3                  | 3.28E-01 | 3                  | 7.47E-01 | 3                  | 7.47E-01 | 2                  | 1.00E+00 | 2                  | 1.00E+00 |
| OR8U1     | 11  | 2                  | 3.20E-01 | 2                  | 3.20E-01 | 2                  | 7.48E-01 | 2                  | 7.48E-01 |                    |          |                    |          |

| SetID    | Chr | ADEH- vs NA        |          |                    |          | ADEH+ vs ADEH-     |          |                    |          | ADEH+ vs NA        |          |                    |          |
|----------|-----|--------------------|----------|--------------------|----------|--------------------|----------|--------------------|----------|--------------------|----------|--------------------|----------|
|          |     | rare novel         |          | all                |          | rare novel         |          | all                |          | rare novel         |          | all                |          |
|          |     | N variants in test | p-value  | N variants in test | p-value  | N variants in test | p-value  | N variants in test | p-value  | N variants in test | p-value  | N variants in test | p-value  |
| OR8U8    | 11  | 2                  | 3.20E-01 | 2                  | 3.20E-01 | 2                  | 7.48E-01 | 2                  | 7.48E-01 |                    |          |                    |          |
| HTRA4    | 8   | 2                  | 3.00E-01 | 2                  | 3.00E-01 | 2                  | 7.48E-01 | 2                  | 7.48E-01 |                    |          |                    |          |
| C14orf93 | 14  | 3                  | 3.20E-01 | 3                  | 3.20E-01 | 3                  | 7.49E-01 | 3                  | 7.49E-01 |                    |          |                    |          |
| ALDH18A1 | 10  | 3                  | 3.50E-01 | 3                  | 3.50E-01 | 3                  | 7.49E-01 | 3                  | 7.49E-01 |                    |          |                    |          |
| PCDHB5   | 5   | 3                  | 3.32E-01 | 3                  | 3.32E-01 | 3                  | 7.49E-01 | 3                  | 7.49E-01 |                    |          |                    |          |
| MYBPH    | 1   | 2                  | 3.11E-01 | 2                  | 3.11E-01 | 2                  | 7.49E-01 | 2                  | 7.49E-01 |                    |          |                    |          |
| SMOC1    | 14  | 3                  | 3.46E-01 | 3                  | 3.46E-01 | 3                  | 7.49E-01 | 3                  | 7.49E-01 |                    |          |                    |          |
| ATXN2    | 12  | 3                  | 3.39E-01 | 3                  | 3.39E-01 | 3                  | 7.50E-01 | 3                  | 7.50E-01 |                    |          |                    |          |
| PGLYRP1  | 19  | 3                  | 3.37E-01 | 3                  | 3.37E-01 | 3                  | 7.50E-01 | 3                  | 7.50E-01 |                    |          |                    |          |
| NDUFS1   | 2   | 3                  | 3.24E-01 | 3                  | 3.24E-01 | 3                  | 7.51E-01 | 3                  | 7.51E-01 |                    |          |                    |          |
| TNS1     | 2   | 11                 | 4.95E-01 | 11                 | 4.95E-01 | 8                  | 7.52E-01 | 8                  | 7.52E-01 | 7                  | 1.00E+00 | 7                  | 1.00E+00 |
| SERPINA5 | 14  | 2                  | 3.10E-01 | 2                  | 3.10E-01 | 2                  | 7.53E-01 | 2                  | 7.53E-01 |                    |          |                    |          |
| SETD9    | 5   | 3                  | 3.44E-01 | 3                  | 3.44E-01 | 3                  | 7.53E-01 | 3                  | 7.53E-01 |                    |          |                    |          |
| EPHA2    | 1   | 7                  | 2.11E-01 | 7                  | 2.11E-01 | 5                  | 1.00E+00 | 5                  | 1.00E+00 | 5                  | 7.53E-01 | 5                  | 7.53E-01 |
| WDR49    | 3   | 3                  | 3.36E-01 | 3                  | 3.36E-01 | 3                  | 7.53E-01 | 3                  | 7.53E-01 |                    |          |                    |          |
| IP6K3    | 6   | 3                  | 3.45E-01 | 3                  | 3.45E-01 | 3                  | 7.54E-01 | 3                  | 7.54E-01 |                    |          |                    |          |
| IFT81    | 12  | 3                  | 8.34E-01 | 3                  | 8.34E-01 | 2                  | 1.00E+00 | 2                  | 1.00E+00 | 3                  | 7.54E-01 | 3                  | 7.54E-01 |
| GRIK5    | 19  | 2                  | 3.28E-01 | 2                  | 3.28E-01 | 2                  | 7.54E-01 | 2                  | 7.54E-01 |                    |          |                    |          |
| FOXK2    | 17  | 4                  | 5.17E-01 | 4                  | 5.17E-01 | 3                  | 1.00E+00 | 3                  | 1.00E+00 | 3                  | 7.54E-01 | 3                  | 7.54E-01 |
| AKAP13   | 15  | 16                 | 7.50E-01 | 16                 | 7.50E-01 | 11                 | 7.87E-01 | 11                 | 7.87E-01 | 9                  | 7.55E-01 | 9                  | 7.55E-01 |
| SPATA5L1 | 15  | 5                  | 8.27E-01 | 5                  | 8.27E-01 | 5                  | 1.00E+00 | 5                  | 1.00E+00 | 1                  | 7.55E-01 | 1                  | 7.55E-01 |
| VWA2     | 10  | 3                  | 5.25E-01 | 3                  | 5.25E-01 | 3                  | 7.55E-01 | 3                  | 7.55E-01 | 2                  | 1.00E+00 | 2                  | 1.00E+00 |
| ZDHHC18  | 1   | 3                  | 3.15E-01 | 3                  | 3.15E-01 | 3                  | 7.56E-01 | 3                  | 7.56E-01 |                    |          |                    |          |
| ROS1     | 6   | 16                 | 2.14E-01 | 16                 | 2.14E-01 | 14                 | 7.57E-01 | 14                 | 7.57E-01 | 8                  | 8.91E-01 | 8                  | 8.91E-01 |
| ZNF441   | 19  | 3                  | 3.50E-01 | 3                  | 3.50E-01 | 3                  | 7.57E-01 | 3                  | 7.57E-01 |                    |          |                    |          |
| PHKG2    | 16  | 3                  | 3.44E-01 | 3                  | 3.44E-01 | 3                  | 7.57E-01 | 3                  | 7.57E-01 |                    |          |                    |          |
| MGST3    | 1   | 3                  | 3.40E-01 | 3                  | 3.40E-01 | 3                  | 7.57E-01 | 3                  | 7.57E-01 |                    |          |                    |          |
| HSD17B3  | 9   | 4                  | 1.00E+00 | 4                  | 1.00E+00 | 4                  | 7.57E-01 | 4                  | 7.57E-01 | 1                  | 1.00E+00 | 1                  | 1.00E+00 |
| ADAMTS13 | 9   | 3                  | 3.41E-01 | 3                  | 3.41E-01 | 3                  | 7.58E-01 | 3                  | 7.58E-01 |                    |          |                    |          |
| MYRIP    | 3   | 3                  | 3.25E-01 | 3                  | 3.25E-01 | 3                  | 7.58E-01 | 3                  | 7.58E-01 |                    |          |                    |          |
| UFSP2    | 4   | 3                  | 3.37E-01 | 3                  | 3.37E-01 | 3                  | 7.58E-01 | 3                  | 7.58E-01 |                    |          |                    |          |
| APOLD1   | 12  | 3                  | 3.22E-01 | 3                  | 3.22E-01 | 3                  | 7.59E-01 | 3                  | 7.59E-01 |                    |          |                    |          |
| MARS     | 12  | 3                  | 3.53E-01 | 3                  | 3.53E-01 | 3                  | 7.59E-01 | 3                  | 7.59E-01 |                    |          |                    |          |
| DNAJA3   | 16  | 3                  | 3.44E-01 | 3                  | 3.44E-01 | 3                  | 7.60E-01 | 3                  | 7.60E-01 |                    |          |                    |          |
| SH2D4A   | 8   | 6                  | 1.00E+00 | 6                  | 1.00E+00 | 4                  | 1.00E+00 | 4                  | 1.00E+00 | 4                  | 7.60E-01 | 4                  | 7.60E-01 |
| TUBGCP6  | 22  | 3                  | 3.42E-01 | 3                  | 3.42E-01 | 3                  | 7.60E-01 | 3                  | 7.60E-01 |                    |          |                    |          |
| C1QB     | 1   | 2                  | 3.19E-01 | 2                  | 3.19E-01 | 2                  | 7.61E-01 | 2                  | 7.61E-01 |                    |          |                    |          |
| NOL4L    | 20  | 2                  | 2.79E-01 | 2                  | 2.79E-01 | 2                  | 7.61E-01 | 2                  | 7.61E-01 |                    |          |                    |          |
| ABCC1    | 16  | 13                 | 8.02E-01 | 13                 | 8.02E-01 | 11                 | 8.41E-01 | 11                 | 8.41E-01 | 6                  | 7.62E-01 | 6                  | 7.62E-01 |
| RASSF9   | 12  | 3                  | 3.57E-01 | 3                  | 3.57E-01 | 3                  | 7.63E-01 | 3                  | 7.63E-01 |                    |          |                    |          |
| SMG8     | 17  | 2                  | 3.15E-01 | 2                  | 3.15E-01 | 2                  | 7.63E-01 | 2                  | 7.63E-01 |                    |          |                    |          |
| CAMSAP1  | 9   | 9                  | 8.81E-01 | 9                  | 8.81E-01 | 8                  | 1.00E+00 | 8                  | 1.00E+00 | 3                  | 7.63E-01 | 3                  | 7.63E-01 |
| ITIH1    | 3   | 3                  | 3.37E-01 | 3                  | 3.37E-01 | 3                  | 7.64E-01 | 3                  | 7.64E-01 |                    |          |                    |          |
| SUN2     | 22  | 2                  | 1.00E+00 | 3                  | 1.00E+00 | 2                  | 1.00E+00 | 3                  | 7.64E-01 | 1                  | 1.00E+00 | 2                  | 1.00E+00 |
| ZSCAN5A  | 19  |                    |          | 1                  | 5.44E-01 |                    |          | 1                  | 7.64E-01 |                    |          | 1                  | 8.45E-01 |
| CFAP61   | 20  | 3                  | 3.46E-01 | 3                  | 3.46E-01 | 3                  | 7.65E-01 | 3                  | 7.65E-01 |                    |          |                    |          |
| GAL3ST3  | 11  | 3                  | 3.47E-01 | 3                  | 3.47E-01 | 3                  | 7.65E-01 | 3                  | 7.65E-01 |                    |          |                    |          |
| LIPT1    | 2   | 2                  | 3.08E-01 | 2                  | 3.08E-01 | 2                  | 7.65E-01 | 2                  | 7.65E-01 |                    |          |                    |          |

| SetID    | Chr | ADEH- vs NA        |          |                    |          | ADEH+ vs ADEH-     |          |                    |          | ADEH+ vs NA        |          |                    |          |
|----------|-----|--------------------|----------|--------------------|----------|--------------------|----------|--------------------|----------|--------------------|----------|--------------------|----------|
|          |     | rarenovel          |          | all                |          | rarenovel          |          | all                |          | rarenovel          |          | all                |          |
|          |     | N variants in test | p-value  | N variants in test | p-value  | N variants in test | p-value  | N variants in test | p-value  | N variants in test | p-value  | N variants in test | p-value  |
| RPF2     | 6   | 3                  | 3.28E-01 | 3                  | 3.28E-01 | 3                  | 7.66E-01 | 3                  | 7.66E-01 |                    |          |                    |          |
| TLDC1    | 16  | 4                  | 6.46E-01 | 4                  | 6.46E-01 | 3                  | 1.00E+00 | 3                  | 1.00E+00 | 2                  | 7.66E-01 | 2                  | 7.66E-01 |
| MATK     | 19  | 3                  | 3.29E-01 | 3                  | 3.29E-01 | 3                  | 7.66E-01 | 3                  | 7.66E-01 |                    |          |                    |          |
| CRYBB3   | 22  | 3                  | 7.07E-01 | 3                  | 7.07E-01 | 2                  | 1.00E+00 | 2                  | 1.00E+00 | 2                  | 7.66E-01 | 2                  | 7.66E-01 |
| LAMB4    | 7   | 9                  | 6.33E-01 | 9                  | 6.33E-01 | 5                  | 7.67E-01 | 5                  | 7.67E-01 | 8                  | 8.96E-01 | 8                  | 8.96E-01 |
| CCDC62   | 12  | 3                  | 3.28E-01 | 3                  | 3.28E-01 | 3                  | 7.67E-01 | 3                  | 7.67E-01 | 1                  | 1.00E+00 | 1                  | 1.00E+00 |
| DDC      | 7   | 3                  | 3.42E-01 | 3                  | 3.42E-01 | 3                  | 7.68E-01 | 3                  | 7.68E-01 |                    |          |                    |          |
| BBOX1    | 11  | 3                  | 3.29E-01 | 3                  | 3.29E-01 | 3                  | 7.69E-01 | 3                  | 7.69E-01 |                    |          |                    |          |
| MIA2     | 14  | 3                  | 3.44E-01 | 3                  | 3.44E-01 | 3                  | 7.69E-01 | 3                  | 7.69E-01 |                    |          |                    |          |
| SLC11A1  | 2   | 4                  | 2.26E-01 | 4                  | 2.26E-01 | 4                  | 7.72E-01 | 4                  | 7.72E-01 |                    |          |                    |          |
| CFAP100  | 3   | 3                  | 4.28E-01 | 3                  | 4.28E-01 | 2                  | 8.65E-01 | 2                  | 8.65E-01 | 3                  | 7.72E-01 | 3                  | 7.72E-01 |
| HSPBAP1  | 3   |                    |          | 1                  | 6.68E-01 |                    |          | 1                  | 1.00E+00 |                    |          | 1                  | 7.72E-01 |
| PDHX     | 11  | 3                  | 3.40E-01 | 3                  | 3.40E-01 | 3                  | 7.73E-01 | 3                  | 7.73E-01 |                    |          |                    |          |
| CASP4    | 11  | 3                  | 3.28E-01 | 3                  | 3.28E-01 | 3                  | 7.73E-01 | 3                  | 7.73E-01 |                    |          |                    |          |
| SLC4A3   | 2   | 3                  | 3.47E-01 | 3                  | 3.47E-01 | 3                  | 7.73E-01 | 3                  | 7.73E-01 |                    |          |                    |          |
| HDAC7    | 12  | 3                  | 3.29E-01 | 3                  | 3.29E-01 | 3                  | 7.73E-01 | 3                  | 7.73E-01 |                    |          |                    |          |
| TRIM35   | 8   | 2                  | 2.97E-01 | 2                  | 2.97E-01 | 2                  | 7.73E-01 | 2                  | 7.73E-01 |                    |          |                    |          |
| CPA3     | 3   | 4                  | 9.02E-01 | 4                  | 9.02E-01 | 4                  | 8.09E-01 | 4                  | 8.09E-01 | 3                  | 7.73E-01 | 3                  | 7.73E-01 |
| TTL4     | 2   | 5                  | 1.00E+00 | 5                  | 1.00E+00 | 5                  | 1.00E+00 | 5                  | 1.00E+00 | 3                  | 7.73E-01 | 3                  | 7.73E-01 |
| KCNJ10   | 1   | 3                  | 1.50E-01 | 3                  | 1.50E-01 | 2                  | 7.73E-01 | 2                  | 7.73E-01 | 2                  | 1.00E+00 | 2                  | 1.00E+00 |
| EIF2AK4  | 15  | 3                  | 3.39E-01 | 4                  | 3.41E-01 | 3                  | 7.73E-01 | 4                  | 7.85E-01 |                    |          | 1                  | 8.63E-01 |
| PPT1     | 1   | 3                  | 3.37E-01 | 3                  | 3.37E-01 | 3                  | 7.73E-01 | 3                  | 7.73E-01 |                    |          |                    |          |
| CBX2     | 17  | 3                  | 3.41E-01 | 3                  | 3.41E-01 | 3                  | 7.74E-01 | 3                  | 7.74E-01 |                    |          |                    |          |
| SIGLEC6  | 19  | 5                  | 2.26E-01 | 5                  | 2.26E-01 | 4                  | 7.74E-01 | 4                  | 7.74E-01 | 3                  | 1.00E+00 | 3                  | 1.00E+00 |
| NARFL    | 16  | 4                  | 2.45E-01 | 4                  | 2.45E-01 | 4                  | 7.75E-01 | 4                  | 7.75E-01 |                    |          |                    |          |
| IFIT1    | 10  | 3                  | 3.58E-01 | 3                  | 3.58E-01 | 3                  | 7.77E-01 | 3                  | 7.77E-01 |                    |          |                    |          |
| BRINP1   | 9   | 3                  | 2.31E-01 | 3                  | 2.31E-01 | 3                  | 7.77E-01 | 3                  | 7.77E-01 |                    |          |                    |          |
| COG4     | 16  | 3                  | 3.50E-01 | 3                  | 3.50E-01 | 3                  | 7.77E-01 | 3                  | 7.77E-01 |                    |          |                    |          |
| KHDC3L   | 6   |                    |          | 1                  | 7.15E-01 |                    |          | 1                  | 7.84E-01 |                    |          | 1                  | 7.78E-01 |
| ARID5A   | 2   | 3                  | 3.36E-01 | 3                  | 3.36E-01 | 3                  | 7.78E-01 | 3                  | 7.78E-01 |                    |          |                    |          |
| SLAMF1   | 1   |                    |          | 1                  | 6.58E-01 |                    |          | 1                  | 1.00E+00 |                    |          | 1                  | 7.78E-01 |
| P2RY2    | 11  |                    |          | 1                  | 1.90E-01 |                    |          | 1                  | 7.78E-01 |                    |          | 1                  | 1.00E+00 |
| SERPIND1 | 22  | 3                  | 3.26E-01 | 3                  | 3.26E-01 | 3                  | 7.78E-01 | 3                  | 7.78E-01 |                    |          |                    |          |
| TLL3     | 3   | 3                  | 8.50E-01 | 3                  | 8.50E-01 | 3                  | 7.78E-01 | 3                  | 7.78E-01 | 2                  | 7.90E-01 | 2                  | 7.90E-01 |
| CLIP4    | 2   | 3                  | 3.32E-01 | 3                  | 3.32E-01 | 3                  | 7.79E-01 | 3                  | 7.79E-01 |                    |          |                    |          |
| TRIM29   | 11  | 3                  | 5.61E-01 | 3                  | 5.61E-01 | 2                  | 1.00E+00 | 2                  | 1.00E+00 | 3                  | 7.79E-01 | 3                  | 7.79E-01 |
| C9orf9   | 9   | 3                  | 3.42E-01 | 3                  | 3.42E-01 | 3                  | 7.79E-01 | 3                  | 7.79E-01 |                    |          |                    |          |
| FXD1     | 19  | 1                  | 8.60E-01 | 1                  | 8.60E-01 | 1                  | 7.80E-01 | 1                  | 7.80E-01 | 1                  | 1.00E+00 | 1                  | 1.00E+00 |
| SLC47A1  | 17  | 2                  | 2.13E-01 | 2                  | 2.13E-01 | 2                  | 7.81E-01 | 2                  | 7.81E-01 |                    |          |                    |          |
| MSS51    | 10  | 3                  | 4.34E-01 | 3                  | 4.34E-01 | 2                  | 1.00E+00 | 2                  | 1.00E+00 | 3                  | 7.81E-01 | 3                  | 7.81E-01 |
| MTMR14   | 3   | 3                  | 3.27E-01 | 3                  | 3.27E-01 | 3                  | 7.82E-01 | 3                  | 7.82E-01 |                    |          |                    |          |
| AMT      | 3   | 3                  | 3.46E-01 | 3                  | 3.46E-01 | 3                  | 7.82E-01 | 3                  | 7.82E-01 |                    |          |                    |          |
| ITGA4    | 2   | 3                  | 3.36E-01 | 3                  | 3.36E-01 | 3                  | 7.82E-01 | 3                  | 7.82E-01 |                    |          |                    |          |
| ZNF846   | 19  | 5                  | 1.83E-01 | 5                  | 1.83E-01 | 4                  | 1.00E+00 | 4                  | 1.00E+00 | 3                  | 7.83E-01 | 3                  | 7.83E-01 |
| TMEM94   | 17  | 3                  | 3.43E-01 | 3                  | 3.43E-01 | 3                  | 7.83E-01 | 3                  | 7.83E-01 |                    |          |                    |          |
| CSNK1D   | 17  | 3                  | 3.30E-01 | 3                  | 3.30E-01 | 3                  | 7.83E-01 | 3                  | 7.83E-01 |                    |          |                    |          |
| MUT      | 6   | 3                  | 3.28E-01 | 3                  | 3.28E-01 | 3                  | 7.84E-01 | 3                  | 7.84E-01 |                    |          |                    |          |
| C1orf167 | 1   | 5                  | 6.17E-01 | 5                  | 6.17E-01 | 5                  | 7.84E-01 | 5                  | 7.84E-01 | 2                  | 1.00E+00 | 2                  | 1.00E+00 |

| SetID    | Chr | ADEH- vs NA        |          |                    |          | ADEH+ vs ADEH-     |          |                    |          | ADEH+ vs NA        |          |                    |          |
|----------|-----|--------------------|----------|--------------------|----------|--------------------|----------|--------------------|----------|--------------------|----------|--------------------|----------|
|          |     | rarenovel          |          | all                |          | rarenovel          |          | all                |          | rarenovel          |          | all                |          |
|          |     | N variants in test | p-value  | N variants in test | p-value  | N variants in test | p-value  | N variants in test | p-value  | N variants in test | p-value  | N variants in test | p-value  |
| BTBD11   | 12  | 3                  | 3.54E-01 | 3                  | 3.54E-01 | 3                  | 7.84E-01 | 3                  | 7.84E-01 |                    |          |                    |          |
| GTF3C1   | 16  | 4                  | 5.22E-01 | 4                  | 5.22E-01 | 2                  | 1.00E+00 | 2                  | 1.00E+00 | 4                  | 7.84E-01 | 4                  | 7.84E-01 |
| ADGRG6   | 6   | 2                  | 3.14E-01 | 2                  | 3.14E-01 | 2                  | 7.84E-01 | 2                  | 7.84E-01 |                    |          |                    |          |
| CAPG     | 2   | 3                  | 2.19E-01 | 3                  | 2.19E-01 | 3                  | 7.84E-01 | 3                  | 7.84E-01 |                    |          |                    |          |
| SLC6A17  | 1   | 3                  | 2.85E-01 | 3                  | 2.85E-01 | 3                  | 7.85E-01 | 3                  | 7.85E-01 |                    |          |                    |          |
| IARS     | 9   | 3                  | 3.37E-01 | 3                  | 3.37E-01 | 3                  | 7.85E-01 | 3                  | 7.85E-01 |                    |          |                    |          |
| ZNF821   | 16  | 4                  | 7.29E-01 | 4                  | 7.29E-01 | 3                  | 9.01E-01 | 3                  | 9.01E-01 | 3                  | 7.85E-01 | 3                  | 7.85E-01 |
| TRPV1    | 17  | 3                  | 3.46E-01 | 3                  | 3.46E-01 | 3                  | 7.86E-01 | 3                  | 7.86E-01 |                    |          |                    |          |
| ALKBH8   | 11  | 6                  | 7.43E-01 | 6                  | 7.43E-01 | 6                  | 7.86E-01 | 6                  | 7.86E-01 | 3                  | 1.00E+00 | 3                  | 1.00E+00 |
| JAK1     | 1   | 3                  | 3.28E-01 | 3                  | 3.28E-01 | 3                  | 7.88E-01 | 3                  | 7.88E-01 |                    |          |                    |          |
| NRDE2    | 14  | 5                  | 7.62E-01 | 5                  | 7.62E-01 | 5                  | 7.89E-01 | 5                  | 7.89E-01 | 2                  | 1.00E+00 | 2                  | 1.00E+00 |
| GGN      | 19  | 1                  | 7.26E-01 | 1                  | 7.26E-01 | 1                  | 7.90E-01 | 1                  | 7.90E-01 | 1                  | 1.00E+00 | 1                  | 1.00E+00 |
| COL6A3   | 2   | 22                 | 3.45E-01 | 23                 | 3.65E-01 | 18                 | 7.93E-01 | 19                 | 7.91E-01 | 8                  | 8.09E-01 | 9                  | 8.52E-01 |
| RIPK4    | 21  | 3                  | 3.33E-01 | 3                  | 3.33E-01 | 3                  | 7.91E-01 | 3                  | 7.91E-01 |                    |          |                    |          |
| EMC1     | 1   | 3                  | 3.42E-01 | 3                  | 3.42E-01 | 3                  | 7.91E-01 | 3                  | 7.91E-01 |                    |          |                    |          |
| PDE1A    | 2   | 3                  | 3.40E-01 | 3                  | 3.40E-01 | 3                  | 7.92E-01 | 3                  | 7.92E-01 |                    |          |                    |          |
| INPP5E   | 9   | 3                  | 3.34E-01 | 3                  | 3.34E-01 | 3                  | 7.92E-01 | 3                  | 7.92E-01 |                    |          |                    |          |
| ASAP3    | 1   | 8                  | 6.79E-01 | 8                  | 6.79E-01 | 6                  | 7.92E-01 | 6                  | 7.92E-01 | 5                  | 9.11E-01 | 5                  | 9.11E-01 |
| DNAH6    | 2   | 21                 | 6.32E-01 | 22                 | 4.69E-01 | 15                 | 8.77E-01 | 16                 | 8.88E-01 | 11                 | 7.93E-01 | 12                 | 8.52E-01 |
| GLCCI1   | 7   | 3                  | 3.32E-01 | 3                  | 3.32E-01 | 3                  | 7.95E-01 | 3                  | 7.95E-01 |                    |          |                    |          |
| TDRD3    | 13  | 3                  | 3.36E-01 | 3                  | 3.36E-01 | 3                  | 7.96E-01 | 3                  | 7.96E-01 |                    |          |                    |          |
| PRM3     | 16  | 3                  | 6.29E-01 | 3                  | 6.29E-01 | 3                  | 1.00E+00 | 3                  | 1.00E+00 | 2                  | 7.97E-01 | 2                  | 7.97E-01 |
| C5orf47  | 5   | 2                  | 8.02E-01 | 2                  | 8.02E-01 | 2                  | 1.00E+00 | 2                  | 1.00E+00 | 1                  | 7.97E-01 | 1                  | 7.97E-01 |
| PIEZO1   | 16  | 15                 | 1.28E-01 | 15                 | 1.28E-01 | 10                 | 1.00E+00 | 10                 | 1.00E+00 | 10                 | 7.98E-01 | 10                 | 7.98E-01 |
| RNMTL1   | 17  | 2                  | 2.01E-01 | 2                  | 2.01E-01 | 2                  | 7.98E-01 | 2                  | 7.98E-01 |                    |          |                    |          |
| RSPH3    | 6   | 3                  | 5.23E-01 | 3                  | 5.23E-01 | 3                  | 1.00E+00 | 3                  | 1.00E+00 | 2                  | 7.99E-01 | 2                  | 7.99E-01 |
| ENO3     | 17  | 3                  | 3.39E-01 | 3                  | 3.39E-01 | 3                  | 7.99E-01 | 3                  | 7.99E-01 |                    |          |                    |          |
| KREMEN1  | 22  | 3                  | 3.41E-01 | 3                  | 3.41E-01 | 3                  | 7.99E-01 | 3                  | 7.99E-01 |                    |          |                    |          |
| KIAA1033 | 12  | 3                  | 2.37E-01 | 3                  | 2.37E-01 | 3                  | 7.99E-01 | 3                  | 7.99E-01 |                    |          |                    |          |
| NSUN3    | 3   | 3                  | 3.14E-01 | 3                  | 3.14E-01 | 3                  | 7.99E-01 | 3                  | 7.99E-01 |                    |          |                    |          |
| CES4A    | 16  | 3                  | 3.35E-01 | 3                  | 3.35E-01 | 3                  | 8.01E-01 | 3                  | 8.01E-01 |                    |          |                    |          |
| CEACAM21 | 19  | 2                  | 4.10E-01 | 2                  | 4.10E-01 | 2                  | 1.00E+00 | 2                  | 1.00E+00 | 1                  | 8.01E-01 | 1                  | 8.01E-01 |
| TBC1D31  | 8   | 3                  | 3.27E-01 | 3                  | 3.27E-01 | 3                  | 8.01E-01 | 3                  | 8.01E-01 |                    |          |                    |          |
| FAM71C   | 12  |                    |          | 1                  | 7.48E-01 |                    |          | 1                  | 9.18E-01 |                    |          | 1                  | 8.02E-01 |
| GDA      | 9   | 3                  | 5.32E-01 | 3                  | 5.32E-01 | 2                  | 8.03E-01 | 2                  | 8.03E-01 | 2                  | 1.00E+00 | 2                  | 1.00E+00 |
| DCBLD2   | 3   | 3                  | 3.19E-01 | 3                  | 3.19E-01 | 3                  | 8.04E-01 | 3                  | 8.04E-01 |                    |          |                    |          |
| GCDH     | 19  | 3                  | 3.53E-01 | 3                  | 3.53E-01 | 3                  | 8.04E-01 | 3                  | 8.04E-01 |                    |          |                    |          |
| CATSPERG | 19  | 3                  | 3.28E-01 | 3                  | 3.28E-01 | 3                  | 8.06E-01 | 3                  | 8.06E-01 |                    |          |                    |          |
| PSAPL1   | 4   |                    |          | 1                  | 3.95E-01 |                    |          | 1                  | 1.00E+00 |                    |          | 1                  | 8.07E-01 |
| CCAR2    | 8   | 3                  | 3.24E-01 | 3                  | 3.24E-01 | 3                  | 8.07E-01 | 3                  | 8.07E-01 |                    |          |                    |          |
| SPOCK3   | 4   | 3                  | 3.17E-01 | 3                  | 3.17E-01 | 3                  | 8.07E-01 | 3                  | 8.07E-01 |                    |          |                    |          |
| PLEK2    | 14  | 3                  | 2.21E-01 | 3                  | 2.21E-01 | 3                  | 8.08E-01 | 3                  | 8.08E-01 |                    |          |                    |          |
| PPM1F    | 22  | 2                  | 2.29E-01 | 2                  | 2.29E-01 | 2                  | 1.00E+00 | 2                  | 1.00E+00 | 1                  | 8.11E-01 | 1                  | 8.11E-01 |
| ATP10B   | 5   | 6                  | 1.42E-01 | 6                  | 1.42E-01 | 5                  | 8.26E-01 | 5                  | 8.26E-01 | 5                  | 8.11E-01 | 5                  | 8.11E-01 |
| TLE6     | 19  | 3                  | 3.27E-01 | 3                  | 3.27E-01 | 3                  | 8.11E-01 | 3                  | 8.11E-01 |                    |          |                    |          |
| BCAS3    | 17  | 3                  | 2.30E-01 | 3                  | 2.30E-01 | 3                  | 8.11E-01 | 3                  | 8.11E-01 |                    |          |                    |          |
| RRP15    | 1   | 2                  | 5.74E-02 | 2                  | 5.74E-02 | 1                  | 1.00E+00 | 1                  | 1.00E+00 | 2                  | 8.11E-01 | 2                  | 8.11E-01 |
| RAD51B   | 14  | 3                  | 7.09E-01 | 3                  | 7.09E-01 | 3                  | 8.13E-01 | 3                  | 8.13E-01 | 2                  | 1.00E+00 | 2                  | 1.00E+00 |



| SetID    | Chr | ADEH- vs NA        |          |                    |          | ADEH+ vs ADEH-     |          |                    |          | ADEH+ vs NA        |          |                    |          |
|----------|-----|--------------------|----------|--------------------|----------|--------------------|----------|--------------------|----------|--------------------|----------|--------------------|----------|
|          |     | rare novel         |          | all                |          | rare novel         |          | all                |          | rare novel         |          | all                |          |
|          |     | N variants in test | p-value  | N variants in test | p-value  | N variants in test | p-value  | N variants in test | p-value  | N variants in test | p-value  | N variants in test | p-value  |
| CES3     | 16  | 2                  | 4.49E-01 | 2                  | 4.49E-01 | 2                  | 1.00E+00 | 2                  | 1.00E+00 | 2                  | 8.14E-01 | 2                  | 8.14E-01 |
| ADGRE3   | 19  | 2                  | 1.09E-01 | 2                  | 1.09E-01 | 2                  | 8.14E-01 | 2                  | 8.14E-01 | 1                  | 1.00E+00 | 1                  | 1.00E+00 |
| C16orf96 | 16  | 6                  | 3.92E-01 | 7                  | 4.27E-01 | 5                  | 8.88E-01 | 6                  | 1.00E+00 | 4                  | 8.14E-01 | 5                  | 8.54E-01 |
| OMA1     | 1   | 4                  | 1.62E-01 | 4                  | 1.62E-01 | 4                  | 1.00E+00 | 4                  | 1.00E+00 | 3                  | 8.16E-01 | 3                  | 8.16E-01 |
| CHORDC1  | 11  | 3                  | 2.15E-01 | 3                  | 2.15E-01 | 3                  | 8.18E-01 | 3                  | 8.18E-01 |                    |          |                    |          |
| BATF3    | 1   |                    |          | 1                  | 7.22E-01 |                    |          | 1                  | 8.18E-01 |                    |          | 1                  | 1.00E+00 |
| MCF2L    | 13  | 7                  | 5.62E-01 | 7                  | 5.62E-01 | 7                  | 9.11E-01 | 7                  | 9.11E-01 | 3                  | 8.19E-01 | 3                  | 8.19E-01 |
| TRIP11   | 14  | 12                 | 1.26E-01 | 13                 | 1.26E-01 | 10                 | 1.00E+00 | 11                 | 1.00E+00 | 7                  | 8.19E-01 | 8                  | 8.19E-01 |
| LRP1B    | 2   | 12                 | 8.42E-01 | 12                 | 8.42E-01 | 11                 | 1.00E+00 | 11                 | 1.00E+00 | 6                  | 8.20E-01 | 6                  | 8.20E-01 |
| PCDHGA7  | 5   | 3                  | 1.00E+00 | 3                  | 1.00E+00 | 3                  | 8.20E-01 | 3                  | 8.20E-01 | 1                  | 1.00E+00 | 1                  | 1.00E+00 |
| ADAM8    | 10  | 6                  | 8.82E-01 | 6                  | 8.82E-01 | 6                  | 1.00E+00 | 6                  | 1.00E+00 | 3                  | 8.21E-01 | 3                  | 8.21E-01 |
| UBA7     | 3   | 7                  | 6.12E-01 | 7                  | 6.12E-01 | 7                  | 8.21E-01 | 7                  | 8.21E-01 | 3                  | 1.00E+00 | 3                  | 1.00E+00 |
| PLXNB2   | 22  | 3                  | 8.77E-01 | 3                  | 8.77E-01 | 2                  | 1.00E+00 | 2                  | 1.00E+00 | 3                  | 8.23E-01 | 3                  | 8.23E-01 |
| LIPF     | 10  | 1                  | 2.24E-01 | 2                  | 2.35E-01 | 1                  | 1.00E+00 | 2                  | 1.00E+00 |                    |          | 1                  | 8.23E-01 |
| DNAH7    | 2   | 28                 | 4.34E-01 | 28                 | 4.34E-01 | 21                 | 8.23E-01 | 21                 | 8.23E-01 | 19                 | 9.19E-01 | 19                 | 9.19E-01 |
| OR10H4   | 19  | 3                  | 2.95E-01 | 3                  | 2.95E-01 | 2                  | 1.00E+00 | 2                  | 1.00E+00 | 3                  | 8.24E-01 | 3                  | 8.24E-01 |
| ZNF607   | 19  | 3                  | 2.26E-01 | 3                  | 2.26E-01 | 3                  | 8.24E-01 | 3                  | 8.24E-01 |                    |          |                    |          |
| ILVBL    | 19  | 6                  | 2.35E-01 | 6                  | 2.35E-01 | 5                  | 8.24E-01 | 5                  | 8.24E-01 | 2                  | 1.00E+00 | 2                  | 1.00E+00 |
| OR10A6   | 11  | 3                  | 3.85E-01 | 4                  | 3.85E-01 | 2                  | 1.00E+00 | 3                  | 1.00E+00 | 2                  | 8.25E-01 | 3                  | 8.25E-01 |
| DCT      | 13  | 3                  | 2.20E-01 | 3                  | 2.20E-01 | 3                  | 8.25E-01 | 3                  | 8.25E-01 |                    |          |                    |          |
| SCN5A    | 3   | 13                 | 8.04E-01 | 13                 | 8.04E-01 | 10                 | 8.27E-01 | 10                 | 8.27E-01 | 6                  | 8.58E-01 | 6                  | 8.58E-01 |
| ACTN2    | 1   | 3                  | 2.13E-01 | 3                  | 2.13E-01 | 3                  | 8.28E-01 | 3                  | 8.28E-01 |                    |          |                    |          |
| CCL17    | 16  | 1                  | 8.49E-01 | 1                  | 8.49E-01 | 1                  | 8.29E-01 | 1                  | 8.29E-01 | 1                  | 1.00E+00 | 1                  | 1.00E+00 |
| UEVLD    | 11  | 3                  | 2.23E-01 | 3                  | 2.23E-01 | 3                  | 8.31E-01 | 3                  | 8.31E-01 |                    |          |                    |          |
| ZNF423   | 16  | 4                  | 2.33E-01 | 4                  | 2.33E-01 | 4                  | 8.33E-01 | 4                  | 8.33E-01 |                    |          |                    |          |
| SCARA5   | 8   | 3                  | 2.14E-01 | 3                  | 2.14E-01 | 3                  | 8.34E-01 | 3                  | 8.34E-01 |                    |          |                    |          |
| CLDN5    | 22  |                    |          | 1                  | 1.00E+00 |                    |          | 1                  | 1.00E+00 |                    |          | 1                  | 8.34E-01 |
| TET1     | 10  | 4                  | 2.25E-01 | 4                  | 2.25E-01 | 4                  | 8.37E-01 | 4                  | 8.37E-01 |                    |          |                    |          |
| FAH      | 15  | 2                  | 8.68E-01 | 2                  | 8.68E-01 | 2                  | 1.00E+00 | 2                  | 1.00E+00 | 1                  | 8.39E-01 | 1                  | 8.39E-01 |
| ANKRD28  | 3   | 4                  | 2.26E-01 | 4                  | 2.26E-01 | 4                  | 8.40E-01 | 4                  | 8.40E-01 |                    |          |                    |          |
| SLC6A16  | 19  | 4                  | 1.99E-01 | 4                  | 1.99E-01 | 4                  | 8.41E-01 | 4                  | 8.41E-01 |                    |          |                    |          |
| SIRT3    | 11  | 3                  | 2.14E-01 | 3                  | 2.14E-01 | 3                  | 8.42E-01 | 3                  | 8.42E-01 |                    |          |                    |          |
| TMTC3    | 12  | 4                  | 2.28E-01 | 4                  | 2.28E-01 | 4                  | 8.43E-01 | 4                  | 8.43E-01 |                    |          |                    |          |
| NUMA1    | 11  | 15                 | 4.00E-01 | 15                 | 4.00E-01 | 11                 | 1.00E+00 | 11                 | 1.00E+00 | 7                  | 8.44E-01 | 7                  | 8.44E-01 |
| TBATA    | 10  | 4                  | 2.26E-01 | 4                  | 2.26E-01 | 4                  | 8.46E-01 | 4                  | 8.46E-01 |                    |          |                    |          |
| MATN1    | 1   | 4                  | 2.31E-01 | 4                  | 2.31E-01 | 4                  | 8.47E-01 | 4                  | 8.47E-01 |                    |          |                    |          |
| HHIP     | 4   | 4                  | 2.33E-01 | 4                  | 2.33E-01 | 4                  | 8.47E-01 | 4                  | 8.47E-01 |                    |          |                    |          |
| RFX4     | 12  | 4                  | 2.31E-01 | 4                  | 2.31E-01 | 4                  | 8.48E-01 | 4                  | 8.48E-01 |                    |          |                    |          |
| ALDH9A1  | 1   | 3                  | 3.17E-01 | 3                  | 3.17E-01 | 3                  | 1.00E+00 | 3                  | 1.00E+00 | 2                  | 8.48E-01 | 2                  | 8.48E-01 |
| FAM166B  | 9   |                    |          | 1                  | 4.00E-01 |                    |          | 1                  | 1.00E+00 |                    |          | 1                  | 8.49E-01 |
| PTPRA    | 20  | 3                  | 2.34E-01 | 3                  | 2.34E-01 | 3                  | 8.50E-01 | 3                  | 8.50E-01 |                    |          |                    |          |
| OR1B1    | 9   |                    |          | 1                  | 7.35E-01 |                    |          | 1                  | 8.51E-01 |                    |          | 1                  | 1.00E+00 |
| GBGT1    | 9   | 6                  | 4.84E-01 | 7                  | 4.93E-01 | 4                  | 1.00E+00 | 5                  | 1.00E+00 | 6                  | 8.56E-01 | 7                  | 8.87E-01 |
| MYO15A   | 17  | 22                 | 3.94E-01 | 22                 | 3.94E-01 | 16                 | 1.00E+00 | 16                 | 1.00E+00 | 11                 | 8.56E-01 | 11                 | 8.56E-01 |
| HDC      | 15  | 4                  | 2.24E-01 | 4                  | 2.24E-01 | 4                  | 8.57E-01 | 4                  | 8.57E-01 |                    |          |                    |          |
| IGDCC3   | 15  | 3                  | 2.22E-01 | 3                  | 2.22E-01 | 3                  | 8.58E-01 | 3                  | 8.58E-01 |                    |          |                    |          |
| LRRC75A  | 17  | 3                  | 2.18E-01 | 3                  | 2.18E-01 | 3                  | 8.60E-01 | 3                  | 8.60E-01 |                    |          |                    |          |
| NFATC3   | 16  | 4                  | 2.21E-01 | 4                  | 2.21E-01 | 4                  | 8.60E-01 | 4                  | 8.60E-01 |                    |          |                    |          |

| SetID       | Chr | ADEH- vs NA        |          |                    |          | ADEH+ vs ADEH-     |          |                    |          | ADEH+ vs NA        |          |                    |          |
|-------------|-----|--------------------|----------|--------------------|----------|--------------------|----------|--------------------|----------|--------------------|----------|--------------------|----------|
|             |     | rarenovel          |          | all                |          | rarenovel          |          | all                |          | rarenovel          |          | all                |          |
|             |     | N variants in test | p-value  | N variants in test | p-value  | N variants in test | p-value  | N variants in test | p-value  | N variants in test | p-value  | N variants in test | p-value  |
| LRRC16B     | 14  | 10                 | 5.25E-01 | 11                 | 5.93E-01 | 8                  | 1.00E+00 | 9                  | 1.00E+00 | 4                  | 8.61E-01 | 5                  | 1.00E+00 |
| HSPG2       | 1   | 25                 | 2.88E-01 | 25                 | 2.88E-01 | 23                 | 8.66E-01 | 23                 | 8.66E-01 | 14                 | 8.69E-01 | 14                 | 8.69E-01 |
| USPL1       | 13  | 5                  | 6.62E-01 | 5                  | 6.62E-01 | 5                  | 8.68E-01 | 5                  | 8.68E-01 | 3                  | 1.00E+00 | 3                  | 1.00E+00 |
| PCDHGA8     | 5   | 6                  | 7.65E-01 | 7                  | 7.66E-01 | 6                  | 8.70E-01 | 7                  | 8.69E-01 | 4                  | 1.00E+00 | 5                  | 1.00E+00 |
| SPTB        | 14  | 13                 | 7.11E-01 | 13                 | 7.11E-01 | 9                  | 9.10E-01 | 9                  | 9.10E-01 | 7                  | 8.71E-01 | 7                  | 8.71E-01 |
| RP1L1       | 8   | 15                 | 6.15E-01 | 17                 | 5.61E-01 | 12                 | 8.78E-01 | 14                 | 8.84E-01 | 10                 | 1.00E+00 | 12                 | 1.00E+00 |
| GBP4        | 1   | 5                  | 4.09E-01 | 5                  | 4.09E-01 | 2                  | 1.00E+00 | 2                  | 1.00E+00 | 4                  | 8.79E-01 | 4                  | 8.79E-01 |
| ABCC10      | 6   | 12                 | 4.62E-01 | 12                 | 4.62E-01 | 8                  | 8.83E-01 | 8                  | 8.83E-01 | 5                  | 1.00E+00 | 5                  | 1.00E+00 |
| C16orf62    | 16  | 6                  | 1.00E+00 | 6                  | 1.00E+00 | 6                  | 8.87E-01 | 6                  | 8.87E-01 | 5                  | 1.00E+00 | 5                  | 1.00E+00 |
| MCM2        | 3   | 5                  | 3.17E-01 | 5                  | 3.17E-01 | 4                  | 8.91E-01 | 4                  | 8.91E-01 | 3                  | 1.00E+00 | 3                  | 1.00E+00 |
| LAMB1       | 7   | 7                  | 7.69E-01 | 8                  | 7.14E-01 | 5                  | 1.00E+00 | 6                  | 1.00E+00 | 5                  | 1.00E+00 | 6                  | 8.97E-01 |
| COL11A2     | 6   | 6                  | 6.43E-01 | 6                  | 6.43E-01 | 4                  | 1.00E+00 | 4                  | 1.00E+00 | 5                  | 8.98E-01 | 5                  | 8.98E-01 |
| OR1N2       | 9   |                    |          | 1                  | 6.88E-01 |                    |          | 1                  | 9.32E-01 |                    |          | 1                  | 9.10E-01 |
| NOX5        | 15  | 2                  | 3.41E-01 | 3                  | 3.41E-01 | 1                  | 1.00E+00 | 2                  | 1.00E+00 | 2                  | 1.00E+00 | 3                  | 1.00E+00 |
| KRT8        | 12  | 1                  | 7.76E-01 | 1                  | 7.76E-01 | 1                  | 1.00E+00 | 1                  | 1.00E+00 | 1                  | 1.00E+00 | 1                  | 1.00E+00 |
| TBC1D4      | 13  | 3                  | 7.79E-02 | 3                  | 7.79E-02 | 3                  | 1.00E+00 | 3                  | 1.00E+00 | 1                  | 1.00E+00 | 1                  | 1.00E+00 |
| RPF1        | 1   | 2                  | 2.09E-01 | 2                  | 2.09E-01 | 2                  | 1.00E+00 | 2                  | 1.00E+00 |                    |          |                    |          |
| CYSRT1      | 9   | 1                  | 8.59E-01 | 1                  | 8.59E-01 | 1                  | 1.00E+00 | 1                  | 1.00E+00 | 1                  | 1.00E+00 | 1                  | 1.00E+00 |
| RPN1        | 3   | 2                  | 1.98E-01 | 2                  | 1.98E-01 | 2                  | 1.00E+00 | 2                  | 1.00E+00 |                    |          |                    |          |
| SLC36A3     | 5   | 3                  | 3.38E-01 | 3                  | 3.38E-01 | 3                  | 1.00E+00 | 3                  | 1.00E+00 | 1                  | 1.00E+00 | 1                  | 1.00E+00 |
| TACSTD2     | 1   | 1                  | 2.24E-01 | 1                  | 2.24E-01 | 1                  | 1.00E+00 | 1                  | 1.00E+00 |                    |          |                    |          |
| OR10W1      | 11  | 1                  | 1.00E+00 | 1                  | 1.00E+00 | 1                  | 1.00E+00 | 1                  | 1.00E+00 | 1                  | 1.00E+00 | 1                  | 1.00E+00 |
| SHPK        | 17  | 4                  | 5.18E-01 | 4                  | 5.18E-01 | 4                  | 1.00E+00 | 4                  | 1.00E+00 | 2                  | 1.00E+00 | 2                  | 1.00E+00 |
| SAP130      | 2   | 2                  | 1.00E+00 | 2                  | 1.00E+00 | 2                  | 1.00E+00 | 2                  | 1.00E+00 | 1                  | 1.00E+00 | 1                  | 1.00E+00 |
| OXER1       | 2   | 4                  | 7.81E-01 | 4                  | 7.81E-01 | 3                  | 1.00E+00 | 3                  | 1.00E+00 | 2                  | 1.00E+00 | 2                  | 1.00E+00 |
| CLIC3       | 9   | 1                  | 2.26E-01 | 1                  | 2.26E-01 | 1                  | 1.00E+00 | 1                  | 1.00E+00 |                    |          |                    |          |
| KIAA1524    | 3   | 2                  | 8.27E-01 | 2                  | 8.27E-01 | 1                  | 1.00E+00 | 1                  | 1.00E+00 | 2                  | 1.00E+00 | 2                  | 1.00E+00 |
| APLF        | 2   | 2                  | 6.59E-01 | 2                  | 6.59E-01 | 2                  | 1.00E+00 | 2                  | 1.00E+00 | 1                  | 1.00E+00 | 1                  | 1.00E+00 |
| YY1AP1      | 1   | 2                  | 8.88E-01 | 2                  | 8.88E-01 | 2                  | 1.00E+00 | 2                  | 1.00E+00 | 1                  | 1.00E+00 | 1                  | 1.00E+00 |
| PRTN3       | 19  | 1                  | 7.35E-01 | 1                  | 7.35E-01 | 1                  | 1.00E+00 | 1                  | 1.00E+00 | 1                  | 1.00E+00 | 1                  | 1.00E+00 |
| KIF18A      | 11  | 1                  | 7.17E-01 | 1                  | 7.17E-01 | 1                  | 1.00E+00 | 1                  | 1.00E+00 | 1                  | 1.00E+00 | 1                  | 1.00E+00 |
| TXNDC11     | 16  | 3                  | 6.06E-01 | 3                  | 6.06E-01 | 2                  | 1.00E+00 | 2                  | 1.00E+00 | 2                  | 1.00E+00 | 2                  | 1.00E+00 |
| PRSS38      | 1   | 3                  | 6.31E-01 | 3                  | 6.31E-01 | 3                  | 1.00E+00 | 3                  | 1.00E+00 | 3                  | 1.00E+00 | 3                  | 1.00E+00 |
| C9orf131    | 9   | 1                  | 4.08E-01 | 1                  | 4.08E-01 | 1                  | 1.00E+00 | 1                  | 1.00E+00 | 1                  | 1.00E+00 | 1                  | 1.00E+00 |
| OR4S1       | 11  | 2                  | 7.70E-01 | 2                  | 7.70E-01 | 2                  | 1.00E+00 | 2                  | 1.00E+00 | 1                  | 1.00E+00 | 1                  | 1.00E+00 |
| KRT36       | 17  | 2                  | 1.69E-01 | 2                  | 1.69E-01 | 2                  | 1.00E+00 | 2                  | 1.00E+00 |                    |          |                    |          |
| DPP7        | 9   | 2                  | 3.73E-01 | 2                  | 3.73E-01 | 2                  | 1.00E+00 | 2                  | 1.00E+00 | 1                  | 1.00E+00 | 1                  | 1.00E+00 |
| WDR38       | 9   | 1                  | 5.88E-01 | 1                  | 5.88E-01 | 1                  | 1.00E+00 | 1                  | 1.00E+00 | 1                  | 1.00E+00 | 1                  | 1.00E+00 |
| VPS9D1      | 16  | 2                  | 8.38E-01 | 2                  | 8.38E-01 | 1                  | 1.00E+00 | 1                  | 1.00E+00 | 2                  | 1.00E+00 | 2                  | 1.00E+00 |
| SLC36A2     | 5   | 1                  | 2.67E-01 | 1                  | 2.67E-01 | 1                  | 1.00E+00 | 1                  | 1.00E+00 | 1                  | 1.00E+00 | 1                  | 1.00E+00 |
| CCDC27      | 1   | 2                  | 8.61E-01 | 2                  | 8.61E-01 | 2                  | 1.00E+00 | 2                  | 1.00E+00 | 1                  | 1.00E+00 | 1                  | 1.00E+00 |
| GAD2        | 10  | 5                  | 5.00E-01 | 5                  | 5.00E-01 | 3                  | 1.00E+00 | 3                  | 1.00E+00 | 3                  | 1.00E+00 | 3                  | 1.00E+00 |
| PRR5-ARHGAP | 22  | 3                  | 1.14E-01 | 3                  | 1.14E-01 | 2                  | 1.00E+00 | 2                  | 1.00E+00 | 2                  | 1.00E+00 | 2                  | 1.00E+00 |
| KRTAP4-4    | 17  | 1                  | 5.49E-01 | 1                  | 5.49E-01 | 1                  | 1.00E+00 | 1                  | 1.00E+00 | 1                  | 1.00E+00 | 1                  | 1.00E+00 |
| HLA-DQA2    | 6   | 1                  | 7.35E-01 | 1                  | 7.35E-01 | 1                  | 1.00E+00 | 1                  | 1.00E+00 | 1                  | 1.00E+00 | 1                  | 1.00E+00 |
| PLEKHG2     | 19  | 6                  | 8.67E-01 | 6                  | 8.67E-01 | 4                  | 1.00E+00 | 4                  | 1.00E+00 | 3                  | 1.00E+00 | 3                  | 1.00E+00 |
| OR2J3       | 6   | 1                  | 2.39E-01 | 1                  | 2.39E-01 | 1                  | 1.00E+00 | 1                  | 1.00E+00 |                    |          |                    |          |
| ARHGAP8     | 22  | 3                  | 1.14E-01 | 3                  | 1.14E-01 | 2                  | 1.00E+00 | 2                  | 1.00E+00 | 2                  | 1.00E+00 | 2                  | 1.00E+00 |

| SetID   | Chr | ADEH- vs NA        |          |                    |          | ADEH+ vs ADEH-     |          |                    |          | ADEH+ vs NA        |          |                    |          |
|---------|-----|--------------------|----------|--------------------|----------|--------------------|----------|--------------------|----------|--------------------|----------|--------------------|----------|
|         |     | rare novel         |          | all                |          | rare novel         |          | all                |          | rare novel         |          | all                |          |
|         |     | N variants in test | p-value  | N variants in test | p-value  | N variants in test | p-value  | N variants in test | p-value  | N variants in test | p-value  | N variants in test | p-value  |
| TBXAS1  | 7   | 4                  | 3.80E-01 | 4                  | 3.80E-01 | 1                  | 1.00E+00 | 1                  | 1.00E+00 | 4                  | 1.00E+00 | 4                  | 1.00E+00 |
| RPN2    | 20  | 4                  | 3.66E-01 | 4                  | 3.66E-01 | 3                  | 1.00E+00 | 3                  | 1.00E+00 | 2                  | 1.00E+00 | 2                  | 1.00E+00 |
| NPHP3   | 3   | 5                  | 1.00E+00 | 5                  | 1.00E+00 | 5                  | 1.00E+00 | 5                  | 1.00E+00 | 3                  | 1.00E+00 | 3                  | 1.00E+00 |
| PPM1N   | 19  | 2                  | 4.76E-01 | 2                  | 4.76E-01 | 2                  | 1.00E+00 | 2                  | 1.00E+00 | 2                  | 1.00E+00 | 2                  | 1.00E+00 |
| TMEM43  | 3   | 7                  | 8.74E-01 | 7                  | 8.74E-01 | 6                  | 1.00E+00 | 6                  | 1.00E+00 | 3                  | 1.00E+00 | 3                  | 1.00E+00 |
| MRPL51  | 12  | 2                  | 7.28E-01 | 2                  | 7.28E-01 | 2                  | 1.00E+00 | 2                  | 1.00E+00 | 1                  | 1.00E+00 | 1                  | 1.00E+00 |
| CBR3    | 21  | 1                  | 2.22E-01 | 1                  | 2.22E-01 | 1                  | 1.00E+00 | 1                  | 1.00E+00 |                    |          |                    |          |
| SGCE    | 7   | 2                  | 2.68E-01 | 2                  | 2.68E-01 | 2                  | 1.00E+00 | 2                  | 1.00E+00 | 1                  | 1.00E+00 | 1                  | 1.00E+00 |
| OLFM4   | 13  | 1                  | 8.31E-01 | 1                  | 8.31E-01 | 1                  | 1.00E+00 | 1                  | 1.00E+00 | 1                  | 1.00E+00 | 1                  | 1.00E+00 |
| ASCC2   | 22  | 4                  | 6.08E-01 | 4                  | 6.08E-01 | 4                  | 1.00E+00 | 4                  | 1.00E+00 | 2                  | 1.00E+00 | 2                  | 1.00E+00 |
| MYO1E   | 15  | 5                  | 7.36E-01 | 5                  | 7.36E-01 | 4                  | 1.00E+00 | 4                  | 1.00E+00 | 2                  | 1.00E+00 | 2                  | 1.00E+00 |
| LCNL1   | 9   | 1                  | 2.37E-01 | 1                  | 2.37E-01 | 1                  | 1.00E+00 | 1                  | 1.00E+00 |                    |          |                    |          |
| ZDHHC6  | 10  | 1                  | 3.49E-01 | 1                  | 3.49E-01 | 1                  | 1.00E+00 | 1                  | 1.00E+00 | 1                  | 1.00E+00 | 1                  | 1.00E+00 |
| ADAM20  | 14  | 1                  | 2.34E-01 | 1                  | 2.34E-01 | 1                  | 1.00E+00 | 1                  | 1.00E+00 |                    |          |                    |          |
| ZGPAT   | 20  | 2                  | 9.84E-02 | 2                  | 9.84E-02 | 2                  | 1.00E+00 | 2                  | 1.00E+00 |                    |          |                    |          |
| OSCP1   | 1   | 1                  | 4.84E-01 | 1                  | 4.84E-01 | 1                  | 1.00E+00 | 1                  | 1.00E+00 | 1                  | 1.00E+00 | 1                  | 1.00E+00 |
| AKAP6   | 14  | 4                  | 7.00E-01 | 4                  | 7.00E-01 | 4                  | 1.00E+00 | 4                  | 1.00E+00 | 1                  | 1.00E+00 | 1                  | 1.00E+00 |
| CADM3   | 1   | 2                  | 4.97E-01 | 2                  | 4.97E-01 | 1                  | 1.00E+00 | 1                  | 1.00E+00 | 2                  | 1.00E+00 | 2                  | 1.00E+00 |
| NEK10   | 3   | 4                  | 6.98E-01 | 4                  | 6.98E-01 | 2                  | 1.00E+00 | 2                  | 1.00E+00 | 3                  | 1.00E+00 | 3                  | 1.00E+00 |
| TRDN    | 6   | 2                  | 5.85E-01 | 2                  | 5.85E-01 | 1                  | 1.00E+00 | 1                  | 1.00E+00 | 2                  | 1.00E+00 | 2                  | 1.00E+00 |
| ZBTB49  | 4   | 2                  | 2.19E-01 | 2                  | 2.19E-01 | 1                  | 1.00E+00 | 1                  | 1.00E+00 | 2                  | 1.00E+00 | 2                  | 1.00E+00 |
| LARGE   | 22  | 1                  | 8.22E-01 | 1                  | 8.22E-01 | 1                  | 1.00E+00 | 1                  | 1.00E+00 | 1                  | 1.00E+00 | 1                  | 1.00E+00 |
| SLC1A7  | 1   | 4                  | 8.40E-01 | 4                  | 8.40E-01 | 4                  | 1.00E+00 | 4                  | 1.00E+00 | 2                  | 1.00E+00 | 2                  | 1.00E+00 |
| SNAP47  | 1   | 1                  | 2.36E-01 | 1                  | 2.36E-01 | 1                  | 1.00E+00 | 1                  | 1.00E+00 |                    |          |                    |          |
| KLHL41  | 2   | 2                  | 7.19E-01 | 2                  | 7.19E-01 | 1                  | 1.00E+00 | 1                  | 1.00E+00 | 2                  | 1.00E+00 | 2                  | 1.00E+00 |
| MS4A7   | 11  | 1                  | 2.42E-01 | 1                  | 2.42E-01 | 1                  | 1.00E+00 | 1                  | 1.00E+00 |                    |          |                    |          |
| SERAC1  | 6   | 4                  | 8.65E-01 | 4                  | 8.65E-01 | 4                  | 1.00E+00 | 4                  | 1.00E+00 | 1                  | 1.00E+00 | 1                  | 1.00E+00 |
| SPDYE4  | 17  | 1                  | 2.26E-01 | 1                  | 2.26E-01 | 1                  | 1.00E+00 | 1                  | 1.00E+00 |                    |          |                    |          |
| GPC1    | 2   | 3                  | 2.00E-01 | 3                  | 2.00E-01 | 3                  | 1.00E+00 | 3                  | 1.00E+00 | 1                  | 1.00E+00 | 1                  | 1.00E+00 |
| TEKT5   | 16  | 4                  | 8.11E-01 | 4                  | 8.11E-01 | 4                  | 1.00E+00 | 4                  | 1.00E+00 | 2                  | 1.00E+00 | 2                  | 1.00E+00 |
| CEP192  | 18  | 6                  | 7.79E-01 | 6                  | 7.79E-01 | 4                  | 1.00E+00 | 4                  | 1.00E+00 | 4                  | 1.00E+00 | 4                  | 1.00E+00 |
| SOGA1   | 20  | 3                  | 1.59E-01 | 3                  | 1.59E-01 | 3                  | 1.00E+00 | 3                  | 1.00E+00 |                    |          |                    |          |
| CYB5D2  | 17  | 1                  | 6.57E-01 | 1                  | 6.57E-01 | 1                  | 1.00E+00 | 1                  | 1.00E+00 | 1                  | 1.00E+00 | 1                  | 1.00E+00 |
| STK32C  | 10  | 1                  | 6.96E-01 | 1                  | 6.96E-01 | 1                  | 1.00E+00 | 1                  | 1.00E+00 | 1                  | 1.00E+00 | 1                  | 1.00E+00 |
| PHF12   | 17  | 2                  | 8.33E-01 | 2                  | 8.33E-01 | 2                  | 1.00E+00 | 2                  | 1.00E+00 | 1                  | 1.00E+00 | 1                  | 1.00E+00 |
| RFX2    | 19  | 1                  | 1.66E-01 | 1                  | 1.66E-01 | 1                  | 1.00E+00 | 1                  | 1.00E+00 |                    |          |                    |          |
| MUS81   | 11  | 1                  | 6.64E-01 | 1                  | 6.64E-01 | 1                  | 1.00E+00 | 1                  | 1.00E+00 | 1                  | 1.00E+00 | 1                  | 1.00E+00 |
| KDM5B   | 1   | 2                  | 4.09E-01 | 2                  | 4.09E-01 | 1                  | 1.00E+00 | 1                  | 1.00E+00 | 2                  | 1.00E+00 | 2                  | 1.00E+00 |
| CEP57L1 | 6   | 1                  | 1.00E+00 | 1                  | 1.00E+00 | 1                  | 1.00E+00 | 1                  | 1.00E+00 | 1                  | 1.00E+00 | 1                  | 1.00E+00 |
| CASC10  | 10  | 1                  | 1.06E-01 | 1                  | 1.06E-01 | 1                  | 1.00E+00 | 1                  | 1.00E+00 |                    |          |                    |          |
| TMEM181 | 6   | 4                  | 1.00E+00 | 4                  | 1.00E+00 | 4                  | 1.00E+00 | 4                  | 1.00E+00 | 3                  | 1.00E+00 | 3                  | 1.00E+00 |
| SSUH2   | 3   | 5                  | 1.76E-01 | 5                  | 1.76E-01 | 3                  | 1.00E+00 | 3                  | 1.00E+00 | 3                  | 1.00E+00 | 3                  | 1.00E+00 |
| DDHD1   | 14  | 1                  | 4.41E-01 | 1                  | 4.41E-01 | 1                  | 1.00E+00 | 1                  | 1.00E+00 | 1                  | 1.00E+00 | 1                  | 1.00E+00 |
| CETN1   | 18  |                    |          | 1                  | 7.79E-01 |                    |          | 1                  | 1.00E+00 |                    |          | 1                  | 1.00E+00 |
| RHBDD3  | 22  | 1                  | 7.20E-01 | 1                  | 7.20E-01 | 1                  | 1.00E+00 | 1                  | 1.00E+00 | 1                  | 1.00E+00 | 1                  | 1.00E+00 |
| ZKSCAN1 | 7   | 1                  | 6.29E-01 | 1                  | 6.29E-01 | 1                  | 1.00E+00 | 1                  | 1.00E+00 | 1                  | 1.00E+00 | 1                  | 1.00E+00 |
| MAMDC2  | 9   | 1                  | 2.32E-01 | 1                  | 2.32E-01 | 1                  | 1.00E+00 | 1                  | 1.00E+00 |                    |          |                    |          |
| TNS4    | 17  | 4                  | 7.29E-01 | 4                  | 7.29E-01 | 4                  | 1.00E+00 | 4                  | 1.00E+00 | 1                  | 1.00E+00 | 1                  | 1.00E+00 |

| SetID    | Chr | ADEH- vs NA        |          |                    |          | ADEH+ vs ADEH-     |          |                    |          | ADEH+ vs NA        |          |                    |          |
|----------|-----|--------------------|----------|--------------------|----------|--------------------|----------|--------------------|----------|--------------------|----------|--------------------|----------|
|          |     | rare novel         |          | all                |          | rare novel         |          | all                |          | rare novel         |          | all                |          |
|          |     | N variants in test | p-value  | N variants in test | p-value  | N variants in test | p-value  | N variants in test | p-value  | N variants in test | p-value  | N variants in test | p-value  |
| VSIG8    | 1   | 2                  | 1.00E+00 | 2                  | 1.00E+00 | 2                  | 1.00E+00 | 2                  | 1.00E+00 | 1                  | 1.00E+00 | 1                  | 1.00E+00 |
| GPX5     | 6   | 2                  | 7.25E-01 | 2                  | 7.25E-01 | 2                  | 1.00E+00 | 2                  | 1.00E+00 | 1                  | 1.00E+00 | 1                  | 1.00E+00 |
| NLRX1    | 11  | 7                  | 6.47E-01 | 7                  | 6.47E-01 | 5                  | 1.00E+00 | 5                  | 1.00E+00 | 3                  | 1.00E+00 | 3                  | 1.00E+00 |
| SHANK2   | 11  | 3                  | 7.97E-01 | 3                  | 7.97E-01 | 3                  | 1.00E+00 | 3                  | 1.00E+00 | 2                  | 1.00E+00 | 2                  | 1.00E+00 |
| KRT76    | 12  | 4                  | 7.94E-01 | 7                  | 8.53E-01 | 4                  | 1.00E+00 | 7                  | 1.00E+00 | 2                  | 1.00E+00 | 5                  | 1.00E+00 |
| SLC22A16 | 6   | 3                  | 7.85E-01 | 4                  | 7.88E-01 | 3                  | 1.00E+00 | 4                  | 1.00E+00 | 1                  | 1.00E+00 | 2                  | 1.00E+00 |
| MVB12A   | 19  | 5                  | 4.45E-01 | 5                  | 4.45E-01 | 3                  | 1.00E+00 | 3                  | 1.00E+00 | 3                  | 1.00E+00 | 3                  | 1.00E+00 |
| HELB     | 12  | 6                  | 7.04E-01 | 6                  | 7.04E-01 | 5                  | 1.00E+00 | 5                  | 1.00E+00 | 3                  | 1.00E+00 | 3                  | 1.00E+00 |
| RITA1    | 12  | 3                  | 1.00E+00 | 3                  | 1.00E+00 | 2                  | 1.00E+00 | 2                  | 1.00E+00 | 2                  | 1.00E+00 | 2                  | 1.00E+00 |
| DPEP3    | 16  | 3                  | 2.12E-01 | 3                  | 2.12E-01 | 3                  | 1.00E+00 | 3                  | 1.00E+00 | 1                  | 1.00E+00 | 1                  | 1.00E+00 |
| RPP40    | 6   | 2                  | 8.29E-01 | 2                  | 8.29E-01 | 2                  | 1.00E+00 | 2                  | 1.00E+00 | 1                  | 1.00E+00 | 1                  | 1.00E+00 |
| PPP2R3A  | 3   | 8                  | 3.46E-01 | 8                  | 3.46E-01 | 6                  | 1.00E+00 | 6                  | 1.00E+00 | 4                  | 1.00E+00 | 4                  | 1.00E+00 |
| CFAP45   | 1   | 2                  | 1.28E-01 | 2                  | 1.28E-01 | 1                  | 1.00E+00 | 1                  | 1.00E+00 | 2                  | 1.00E+00 | 2                  | 1.00E+00 |
| RNF207   | 1   | 3                  | 6.35E-01 | 3                  | 6.35E-01 | 3                  | 1.00E+00 | 3                  | 1.00E+00 | 1                  | 1.00E+00 | 1                  | 1.00E+00 |
| PCDHB1   | 5   | 2                  | 3.77E-02 | 2                  | 3.77E-02 | 2                  | 1.00E+00 | 2                  | 1.00E+00 | 1                  | 1.00E+00 | 1                  | 1.00E+00 |
| EXOG     | 3   | 5                  | 7.72E-01 | 5                  | 7.72E-01 | 4                  | 1.00E+00 | 4                  | 1.00E+00 | 2                  | 1.00E+00 | 2                  | 1.00E+00 |
| MIDN     | 19  | 1                  | 2.40E-01 | 1                  | 2.40E-01 | 1                  | 1.00E+00 | 1                  | 1.00E+00 |                    |          |                    |          |
| ABL1     | 9   | 3                  | 3.74E-01 | 3                  | 3.74E-01 | 2                  | 1.00E+00 | 2                  | 1.00E+00 | 2                  | 1.00E+00 | 2                  | 1.00E+00 |
| OMG      | 17  | 1                  | 2.31E-01 | 1                  | 2.31E-01 | 1                  | 1.00E+00 | 1                  | 1.00E+00 |                    |          |                    |          |
| AGBL2    | 11  | 3                  | 5.71E-01 | 3                  | 5.71E-01 | 2                  | 1.00E+00 | 2                  | 1.00E+00 | 2                  | 1.00E+00 | 2                  | 1.00E+00 |
| CNBD2    | 20  | 5                  | 6.73E-01 | 5                  | 6.73E-01 | 3                  | 1.00E+00 | 3                  | 1.00E+00 | 3                  | 1.00E+00 | 3                  | 1.00E+00 |
| PRRC2B   | 9   | 9                  | 9.09E-01 | 9                  | 9.09E-01 | 6                  | 1.00E+00 | 6                  | 1.00E+00 | 6                  | 1.00E+00 | 6                  | 1.00E+00 |
| YRDC     | 1   | 1                  | 1.57E-01 | 1                  | 1.57E-01 | 1                  | 1.00E+00 | 1                  | 1.00E+00 |                    |          |                    |          |
| CBX8     | 17  | 2                  | 4.95E-01 | 2                  | 4.95E-01 | 2                  | 1.00E+00 | 2                  | 1.00E+00 | 2                  | 1.00E+00 | 2                  | 1.00E+00 |
| THBS2    | 6   | 4                  | 6.24E-01 | 4                  | 6.24E-01 | 2                  | 1.00E+00 | 2                  | 1.00E+00 | 3                  | 1.00E+00 | 3                  | 1.00E+00 |
| IL23R    | 1   | 3                  | 2.76E-01 | 4                  | 5.36E-01 | 2                  | 1.00E+00 | 3                  | 1.00E+00 | 2                  | 1.00E+00 | 3                  | 1.00E+00 |
| LRRC34   | 3   | 3                  | 3.04E-01 | 3                  | 3.04E-01 | 3                  | 1.00E+00 | 3                  | 1.00E+00 | 1                  | 1.00E+00 | 1                  | 1.00E+00 |
| GRAMD1A  | 19  | 4                  | 6.77E-01 | 4                  | 6.77E-01 | 3                  | 1.00E+00 | 3                  | 1.00E+00 | 2                  | 1.00E+00 | 2                  | 1.00E+00 |
| CFAP58   | 10  | 2                  | 8.63E-01 | 2                  | 8.63E-01 | 2                  | 1.00E+00 | 2                  | 1.00E+00 | 1                  | 1.00E+00 | 1                  | 1.00E+00 |
| MYC      | 8   | 2                  | 7.38E-01 | 2                  | 7.38E-01 | 1                  | 1.00E+00 | 1                  | 1.00E+00 | 2                  | 1.00E+00 | 2                  | 1.00E+00 |
| LRP3     | 19  | 1                  | 2.31E-01 | 1                  | 2.31E-01 | 1                  | 1.00E+00 | 1                  | 1.00E+00 |                    |          |                    |          |
| ETV7     | 6   | 5                  | 5.17E-01 | 5                  | 5.17E-01 | 2                  | 1.00E+00 | 2                  | 1.00E+00 | 4                  | 1.00E+00 | 4                  | 1.00E+00 |
| PTGIR    | 19  | 2                  | 8.00E-01 | 2                  | 8.00E-01 | 2                  | 1.00E+00 | 2                  | 1.00E+00 | 1                  | 1.00E+00 | 1                  | 1.00E+00 |
| ITGA7    | 12  | 3                  | 1.00E+00 | 3                  | 1.00E+00 | 2                  | 1.00E+00 | 2                  | 1.00E+00 | 2                  | 1.00E+00 | 2                  | 1.00E+00 |
| TNFRSF8  | 1   | 1                  | 5.03E-01 | 1                  | 5.03E-01 | 1                  | 1.00E+00 | 1                  | 1.00E+00 | 1                  | 1.00E+00 | 1                  | 1.00E+00 |
| MBOAT1   | 6   | 1                  | 1.00E+00 | 1                  | 1.00E+00 | 1                  | 1.00E+00 | 1                  | 1.00E+00 | 1                  | 1.00E+00 | 1                  | 1.00E+00 |
| FASTKD1  | 2   | 2                  | 7.18E-01 | 2                  | 7.18E-01 | 2                  | 1.00E+00 | 2                  | 1.00E+00 | 1                  | 1.00E+00 | 1                  | 1.00E+00 |
| BPIFB2   | 20  | 2                  | 6.19E-01 | 2                  | 6.19E-01 | 2                  | 1.00E+00 | 2                  | 1.00E+00 | 1                  | 1.00E+00 | 1                  | 1.00E+00 |
| DAB2IP   | 9   | 2                  | 8.85E-01 | 2                  | 8.85E-01 | 2                  | 1.00E+00 | 2                  | 1.00E+00 | 1                  | 1.00E+00 | 1                  | 1.00E+00 |
| IL10RB   | 21  | 1                  | 2.37E-01 | 1                  | 2.37E-01 | 1                  | 1.00E+00 | 1                  | 1.00E+00 |                    |          |                    |          |
| PRSS12   | 4   | 4                  | 6.50E-01 | 4                  | 6.50E-01 | 2                  | 1.00E+00 | 2                  | 1.00E+00 | 3                  | 1.00E+00 | 3                  | 1.00E+00 |
| ACTRT2   | 1   | 5                  | 5.08E-01 | 6                  | 5.07E-01 | 4                  | 1.00E+00 | 5                  | 1.00E+00 | 2                  | 1.00E+00 | 3                  | 1.00E+00 |
| EPHB2    | 1   | 4                  | 2.96E-01 | 4                  | 2.96E-01 | 4                  | 1.00E+00 | 4                  | 1.00E+00 | 1                  | 1.00E+00 | 1                  | 1.00E+00 |
| MYBL1    | 8   | 1                  | 6.11E-01 | 1                  | 6.11E-01 | 1                  | 1.00E+00 | 1                  | 1.00E+00 | 1                  | 1.00E+00 | 1                  | 1.00E+00 |
| TMEM184A | 7   | 3                  | 1.98E-01 | 3                  | 1.98E-01 | 2                  | 1.00E+00 | 2                  | 1.00E+00 | 2                  | 1.00E+00 | 2                  | 1.00E+00 |
| OR8K3    | 11  | 6                  | 8.00E-01 | 6                  | 8.00E-01 | 5                  | 1.00E+00 | 5                  | 1.00E+00 | 2                  | 1.00E+00 | 2                  | 1.00E+00 |
| PCDHGA1  | 5   | 4                  | 7.85E-01 | 4                  | 7.85E-01 | 3                  | 1.00E+00 | 3                  | 1.00E+00 | 2                  | 1.00E+00 | 2                  | 1.00E+00 |
| STARD6   | 18  | 4                  | 5.15E-01 | 4                  | 5.15E-01 | 2                  | 1.00E+00 | 2                  | 1.00E+00 | 3                  | 1.00E+00 | 3                  | 1.00E+00 |

| SetID        | Chr | ADEH- vs NA        |          |                    |          | ADEH+ vs ADEH-     |          |                    |          | ADEH+ vs NA        |          |                    |          |
|--------------|-----|--------------------|----------|--------------------|----------|--------------------|----------|--------------------|----------|--------------------|----------|--------------------|----------|
|              |     | rarenovel          |          | all                |          | rarenovel          |          | all                |          | rarenovel          |          | all                |          |
|              |     | N variants in test | p-value  | N variants in test | p-value  | N variants in test | p-value  | N variants in test | p-value  | N variants in test | p-value  | N variants in test | p-value  |
| SH3TC2       | 5   | 7                  | 5.40E-01 | 7                  | 5.40E-01 | 5                  | 1.00E+00 | 5                  | 1.00E+00 | 3                  | 1.00E+00 | 3                  | 1.00E+00 |
| ZDBF2        | 2   | 6                  | 4.04E-01 | 6                  | 4.04E-01 | 5                  | 1.00E+00 | 5                  | 1.00E+00 | 3                  | 1.00E+00 | 3                  | 1.00E+00 |
| EPCAM        | 2   | 3                  | 6.85E-01 | 3                  | 6.85E-01 | 2                  | 1.00E+00 | 2                  | 1.00E+00 | 2                  | 1.00E+00 | 2                  | 1.00E+00 |
| A4GNT        | 3   | 1                  | 2.33E-01 | 1                  | 2.33E-01 | 1                  | 1.00E+00 | 1                  | 1.00E+00 |                    |          |                    |          |
| ZSCAN30      | 18  | 2                  | 7.75E-01 | 2                  | 7.75E-01 | 2                  | 1.00E+00 | 2                  | 1.00E+00 | 2                  | 1.00E+00 | 2                  | 1.00E+00 |
| BTNL2        | 6   | 1                  | 8.37E-01 | 1                  | 8.37E-01 | 1                  | 1.00E+00 | 1                  | 1.00E+00 | 1                  | 1.00E+00 | 1                  | 1.00E+00 |
| CCDC60       | 12  | 2                  | 3.22E-01 | 2                  | 3.22E-01 | 2                  | 1.00E+00 | 2                  | 1.00E+00 | 1                  | 1.00E+00 | 1                  | 1.00E+00 |
| C1orf106     | 1   | 4                  | 5.73E-01 | 4                  | 5.73E-01 | 2                  | 1.00E+00 | 2                  | 1.00E+00 | 3                  | 1.00E+00 | 3                  | 1.00E+00 |
| TAS1R1       | 1   | 7                  | 8.41E-01 | 7                  | 8.41E-01 | 6                  | 1.00E+00 | 6                  | 1.00E+00 | 3                  | 1.00E+00 | 3                  | 1.00E+00 |
| LPIN3        | 20  | 7                  | 1.90E-01 | 7                  | 1.90E-01 | 4                  | 1.00E+00 | 4                  | 1.00E+00 | 5                  | 1.00E+00 | 5                  | 1.00E+00 |
| DIP2B        | 12  | 4                  | 7.80E-01 | 4                  | 7.80E-01 | 4                  | 1.00E+00 | 4                  | 1.00E+00 | 1                  | 1.00E+00 | 1                  | 1.00E+00 |
| CBR1         | 21  | 1                  | 7.58E-01 | 1                  | 7.58E-01 | 1                  | 1.00E+00 | 1                  | 1.00E+00 | 1                  | 1.00E+00 | 1                  | 1.00E+00 |
| SLC14A2      | 18  | 6                  | 8.77E-01 | 6                  | 8.77E-01 | 5                  | 1.00E+00 | 5                  | 1.00E+00 | 3                  | 1.00E+00 | 3                  | 1.00E+00 |
| NAT16        | 7   |                    |          | 1                  | 1.00E+00 |                    |          | 1                  | 1.00E+00 |                    |          | 1                  | 1.00E+00 |
| SYT9         | 11  | 2                  | 1.00E+00 | 2                  | 1.00E+00 | 2                  | 1.00E+00 | 2                  | 1.00E+00 | 2                  | 1.00E+00 | 2                  | 1.00E+00 |
| ZNF664       | 12  | 1                  | 3.43E-01 | 1                  | 3.43E-01 | 1                  | 1.00E+00 | 1                  | 1.00E+00 | 1                  | 1.00E+00 | 1                  | 1.00E+00 |
| CACNB2       | 10  | 5                  | 6.20E-01 | 6                  | 6.21E-01 | 4                  | 1.00E+00 | 5                  | 1.00E+00 | 2                  | 1.00E+00 | 3                  | 1.00E+00 |
| MTL5         | 11  | 4                  | 6.84E-01 | 5                  | 7.94E-01 | 3                  | 1.00E+00 | 4                  | 1.00E+00 | 3                  | 1.00E+00 | 4                  | 1.00E+00 |
| FAM83G       | 17  | 4                  | 4.70E-01 | 4                  | 4.70E-01 | 4                  | 1.00E+00 | 4                  | 1.00E+00 | 2                  | 1.00E+00 | 2                  | 1.00E+00 |
| SPINK5       | 5   | 2                  | 8.51E-01 | 2                  | 8.51E-01 | 2                  | 1.00E+00 | 2                  | 1.00E+00 | 2                  | 1.00E+00 | 2                  | 1.00E+00 |
| CSGALNACT1   | 8   | 3                  | 4.41E-01 | 3                  | 4.41E-01 | 1                  | 1.00E+00 | 1                  | 1.00E+00 | 3                  | 1.00E+00 | 3                  | 1.00E+00 |
| OXA1L        | 14  | 1                  | 2.21E-01 | 1                  | 2.21E-01 | 1                  | 1.00E+00 | 1                  | 1.00E+00 |                    |          |                    |          |
| SDF2L1       | 22  | 1                  | 7.61E-01 | 1                  | 7.61E-01 | 1                  | 1.00E+00 | 1                  | 1.00E+00 | 1                  | 1.00E+00 | 1                  | 1.00E+00 |
| RAPGEF3      | 12  | 6                  | 5.27E-01 | 6                  | 5.27E-01 | 4                  | 1.00E+00 | 4                  | 1.00E+00 | 4                  | 1.00E+00 | 4                  | 1.00E+00 |
| RIOK2        | 5   | 7                  | 4.07E-01 | 8                  | 4.07E-01 | 7                  | 1.00E+00 | 8                  | 1.00E+00 | 3                  | 1.00E+00 | 4                  | 1.00E+00 |
| SQLE         | 8   | 2                  | 1.00E+00 | 2                  | 1.00E+00 | 2                  | 1.00E+00 | 2                  | 1.00E+00 | 1                  | 1.00E+00 | 1                  | 1.00E+00 |
| PLIN2        | 9   | 4                  | 1.00E+00 | 4                  | 1.00E+00 | 4                  | 1.00E+00 | 4                  | 1.00E+00 | 2                  | 1.00E+00 | 2                  | 1.00E+00 |
| ITGB4        | 17  | 9                  | 8.67E-01 | 9                  | 8.67E-01 | 9                  | 1.00E+00 | 9                  | 1.00E+00 | 4                  | 1.00E+00 | 4                  | 1.00E+00 |
| GLB1L2       | 11  | 4                  | 7.78E-01 | 4                  | 7.78E-01 | 3                  | 1.00E+00 | 3                  | 1.00E+00 | 3                  | 1.00E+00 | 3                  | 1.00E+00 |
| MTERF2       | 12  | 1                  | 2.41E-01 | 1                  | 2.41E-01 | 1                  | 1.00E+00 | 1                  | 1.00E+00 |                    |          |                    |          |
| RFX7         | 15  | 1                  | 4.28E-01 | 1                  | 4.28E-01 | 1                  | 1.00E+00 | 1                  | 1.00E+00 | 1                  | 1.00E+00 | 1                  | 1.00E+00 |
| FIGLA        | 2   | 1                  | 2.35E-01 | 1                  | 2.35E-01 | 1                  | 1.00E+00 | 1                  | 1.00E+00 |                    |          |                    |          |
| GLT8D2       | 12  | 1                  | 4.27E-01 | 1                  | 4.27E-01 | 1                  | 1.00E+00 | 1                  | 1.00E+00 | 1                  | 1.00E+00 | 1                  | 1.00E+00 |
| CCDC87       | 11  | 2                  | 8.87E-01 | 2                  | 8.87E-01 | 2                  | 1.00E+00 | 2                  | 1.00E+00 | 1                  | 1.00E+00 | 1                  | 1.00E+00 |
| DDX20        | 1   | 5                  | 3.07E-01 | 5                  | 3.07E-01 | 4                  | 1.00E+00 | 4                  | 1.00E+00 | 3                  | 1.00E+00 | 3                  | 1.00E+00 |
| ATP4A        | 19  | 4                  | 6.12E-01 | 4                  | 6.12E-01 | 3                  | 1.00E+00 | 3                  | 1.00E+00 | 2                  | 1.00E+00 | 2                  | 1.00E+00 |
| TMEM249      | 8   | 1                  | 1.00E+00 | 1                  | 1.00E+00 | 1                  | 1.00E+00 | 1                  | 1.00E+00 | 1                  | 1.00E+00 | 1                  | 1.00E+00 |
| SLC12A3      | 16  | 7                  | 8.01E-01 | 7                  | 8.01E-01 | 6                  | 1.00E+00 | 6                  | 1.00E+00 | 2                  | 1.00E+00 | 2                  | 1.00E+00 |
| SEMA5B       | 3   | 6                  | 2.55E-01 | 6                  | 2.55E-01 | 5                  | 1.00E+00 | 5                  | 1.00E+00 | 2                  | 1.00E+00 | 2                  | 1.00E+00 |
| AVPR1A       | 12  | 1                  | 7.43E-01 | 1                  | 7.43E-01 | 1                  | 1.00E+00 | 1                  | 1.00E+00 | 1                  | 1.00E+00 | 1                  | 1.00E+00 |
| C8B          | 1   | 7                  | 6.74E-01 | 8                  | 8.04E-01 | 6                  | 1.00E+00 | 7                  | 1.00E+00 | 3                  | 1.00E+00 | 4                  | 1.00E+00 |
| C9orf43      | 9   |                    |          | 1                  | 1.00E+00 |                    |          | 1                  | 1.00E+00 |                    |          | 1                  | 1.00E+00 |
| POR          | 7   | 8                  | 4.75E-01 | 8                  | 4.75E-01 | 5                  | 1.00E+00 | 5                  | 1.00E+00 | 4                  | 1.00E+00 | 4                  | 1.00E+00 |
| ZNF764       | 16  | 3                  | 6.58E-01 | 3                  | 6.58E-01 | 3                  | 1.00E+00 | 3                  | 1.00E+00 | 2                  | 1.00E+00 | 2                  | 1.00E+00 |
| ZHX1-C8orf76 | 8   | 1                  | 3.62E-01 | 1                  | 3.62E-01 | 1                  | 1.00E+00 | 1                  | 1.00E+00 | 1                  | 1.00E+00 | 1                  | 1.00E+00 |
| NOL3         | 16  | 3                  | 2.31E-01 | 3                  | 2.31E-01 | 3                  | 1.00E+00 | 3                  | 1.00E+00 | 1                  | 1.00E+00 | 1                  | 1.00E+00 |
| RRP8         | 11  | 2                  | 6.04E-01 | 2                  | 6.04E-01 | 2                  | 1.00E+00 | 2                  | 1.00E+00 | 1                  | 1.00E+00 | 1                  | 1.00E+00 |
| CD163L1      | 12  | 10                 | 1.57E-01 | 10                 | 1.57E-01 | 5                  | 1.00E+00 | 5                  | 1.00E+00 | 7                  | 1.00E+00 | 7                  | 1.00E+00 |

| SetID    | Chr | ADEH- vs NA        |          |                    |          | ADEH+ vs ADEH-     |          |                    |          | ADEH+ vs NA        |          |                    |          |
|----------|-----|--------------------|----------|--------------------|----------|--------------------|----------|--------------------|----------|--------------------|----------|--------------------|----------|
|          |     | rarenovel          |          | all                |          | rarenovel          |          | all                |          | rarenovel          |          | all                |          |
|          |     | N variants in test | p-value  | N variants in test | p-value  | N variants in test | p-value  | N variants in test | p-value  | N variants in test | p-value  | N variants in test | p-value  |
| NHLRC3   | 13  | 2                  | 5.93E-01 | 2                  | 5.93E-01 | 2                  | 1.00E+00 | 2                  | 1.00E+00 | 2                  | 1.00E+00 | 2                  | 1.00E+00 |
| ADAMTS5  | 21  | 3                  | 1.00E+00 | 4                  | 1.00E+00 | 3                  | 1.00E+00 | 4                  | 1.00E+00 | 2                  | 1.00E+00 | 3                  | 1.00E+00 |
| ADGRB2   | 1   | 7                  | 8.65E-01 | 7                  | 8.65E-01 | 6                  | 1.00E+00 | 6                  | 1.00E+00 | 2                  | 1.00E+00 | 2                  | 1.00E+00 |
| PRAMEF12 | 1   | 2                  | 5.67E-01 | 2                  | 5.67E-01 | 2                  | 1.00E+00 | 2                  | 1.00E+00 | 1                  | 1.00E+00 | 1                  | 1.00E+00 |
| OR4X1    | 11  | 3                  | 6.54E-01 | 4                  | 6.54E-01 | 2                  | 1.00E+00 | 3                  | 1.00E+00 | 2                  | 1.00E+00 | 3                  | 1.00E+00 |
| AGBL3    | 7   | 5                  | 7.58E-01 | 5                  | 7.58E-01 | 4                  | 1.00E+00 | 4                  | 1.00E+00 | 3                  | 1.00E+00 | 3                  | 1.00E+00 |
| EPS8L1   | 19  | 2                  | 4.38E-01 | 2                  | 4.38E-01 | 1                  | 1.00E+00 | 1                  | 1.00E+00 | 2                  | 1.00E+00 | 2                  | 1.00E+00 |
| SULT2B1  | 19  | 2                  | 1.00E+00 | 2                  | 1.00E+00 | 2                  | 1.00E+00 | 2                  | 1.00E+00 | 1                  | 1.00E+00 | 1                  | 1.00E+00 |
| GPR1     | 2   | 2                  | 4.99E-01 | 2                  | 4.99E-01 | 1                  | 1.00E+00 | 1                  | 1.00E+00 | 2                  | 1.00E+00 | 2                  | 1.00E+00 |
| NCOR1    | 17  | 7                  | 8.42E-01 | 7                  | 8.42E-01 | 6                  | 1.00E+00 | 6                  | 1.00E+00 | 4                  | 1.00E+00 | 4                  | 1.00E+00 |
| UTP4     | 16  | 4                  | 8.36E-01 | 4                  | 8.36E-01 | 4                  | 1.00E+00 | 4                  | 1.00E+00 | 1                  | 1.00E+00 | 1                  | 1.00E+00 |
| RTP4     | 3   | 2                  | 8.72E-02 | 2                  | 8.72E-02 | 2                  | 1.00E+00 | 2                  | 1.00E+00 | 1                  | 1.00E+00 | 1                  | 1.00E+00 |
| FUT7     | 9   | 2                  | 3.98E-01 | 2                  | 3.98E-01 | 2                  | 1.00E+00 | 2                  | 1.00E+00 | 2                  | 1.00E+00 | 2                  | 1.00E+00 |
| INVS     | 9   | 3                  | 7.74E-01 | 3                  | 7.74E-01 | 2                  | 1.00E+00 | 2                  | 1.00E+00 | 2                  | 1.00E+00 | 2                  | 1.00E+00 |
| SUOX     | 12  | 4                  | 7.45E-01 | 4                  | 7.45E-01 | 3                  | 1.00E+00 | 3                  | 1.00E+00 | 3                  | 1.00E+00 | 3                  | 1.00E+00 |
| FARP1    | 13  | 8                  | 6.97E-01 | 8                  | 6.97E-01 | 5                  | 1.00E+00 | 5                  | 1.00E+00 | 5                  | 1.00E+00 | 5                  | 1.00E+00 |
| CHD1     | 5   | 2                  | 7.65E-01 | 2                  | 7.65E-01 | 2                  | 1.00E+00 | 2                  | 1.00E+00 | 2                  | 1.00E+00 | 2                  | 1.00E+00 |
| OR1D2    | 17  |                    |          | 1                  | 9.28E-01 |                    |          | 1                  | 1.00E+00 |                    |          | 1                  | 1.00E+00 |
| CENPW    | 6   | 1                  | 9.49E-01 | 1                  | 9.49E-01 | 1                  | 1.00E+00 | 1                  | 1.00E+00 | 1                  | 1.00E+00 | 1                  | 1.00E+00 |
| DLG5     | 10  | 5                  | 1.24E-01 | 5                  | 1.24E-01 | 4                  | 1.00E+00 | 4                  | 1.00E+00 | 2                  | 1.00E+00 | 2                  | 1.00E+00 |
| TPD52    | 8   | 2                  | 8.32E-01 | 2                  | 8.32E-01 | 1                  | 1.00E+00 | 1                  | 1.00E+00 | 2                  | 1.00E+00 | 2                  | 1.00E+00 |
| SPP2     | 2   | 2                  | 5.00E-01 | 2                  | 5.00E-01 | 2                  | 1.00E+00 | 2                  | 1.00E+00 | 1                  | 1.00E+00 | 1                  | 1.00E+00 |
| GRM1     | 6   | 3                  | 8.72E-01 | 3                  | 8.72E-01 | 3                  | 1.00E+00 | 3                  | 1.00E+00 | 2                  | 1.00E+00 | 2                  | 1.00E+00 |
| SLC7A14  | 3   | 2                  | 8.60E-01 | 2                  | 8.60E-01 | 2                  | 1.00E+00 | 2                  | 1.00E+00 | 1                  | 1.00E+00 | 1                  | 1.00E+00 |
| FAM110A  | 20  | 1                  | 5.52E-01 | 1                  | 5.52E-01 | 1                  | 1.00E+00 | 1                  | 1.00E+00 | 1                  | 1.00E+00 | 1                  | 1.00E+00 |
| STXBP5L  | 3   | 2                  | 1.00E+00 | 2                  | 1.00E+00 | 2                  | 1.00E+00 | 2                  | 1.00E+00 | 2                  | 1.00E+00 | 2                  | 1.00E+00 |
| AMPD3    | 11  | 2                  | 3.44E-01 | 3                  | 4.57E-01 | 2                  | 1.00E+00 | 3                  | 1.00E+00 | 1                  | 1.00E+00 | 2                  | 1.00E+00 |
| C2orf81  | 2   | 2                  | 2.06E-01 | 2                  | 2.06E-01 | 2                  | 1.00E+00 | 2                  | 1.00E+00 | 1                  | 1.00E+00 | 1                  | 1.00E+00 |
| SPDL1    | 5   | 8                  | 3.56E-01 | 8                  | 3.56E-01 | 4                  | 1.00E+00 | 4                  | 1.00E+00 | 5                  | 1.00E+00 | 5                  | 1.00E+00 |
| MRGPRX1  | 11  | 1                  | 4.89E-01 | 1                  | 4.89E-01 | 1                  | 1.00E+00 | 1                  | 1.00E+00 | 1                  | 1.00E+00 | 1                  | 1.00E+00 |
| FRMPD2   | 10  | 2                  | 4.07E-01 | 2                  | 4.07E-01 | 2                  | 1.00E+00 | 2                  | 1.00E+00 | 2                  | 1.00E+00 | 2                  | 1.00E+00 |
| KRT32    | 17  | 5                  | 6.99E-01 | 7                  | 6.99E-01 | 5                  | 1.00E+00 | 7                  | 1.00E+00 | 3                  | 1.00E+00 | 5                  | 1.00E+00 |
| TVP23C   | 17  | 1                  | 8.46E-01 | 1                  | 8.46E-01 | 1                  | 1.00E+00 | 1                  | 1.00E+00 | 1                  | 1.00E+00 | 1                  | 1.00E+00 |
| KLHL30   | 2   | 5                  | 5.14E-01 | 5                  | 5.14E-01 | 2                  | 1.00E+00 | 2                  | 1.00E+00 | 4                  | 1.00E+00 | 4                  | 1.00E+00 |
| C7       | 5   | 3                  | 3.80E-01 | 3                  | 3.80E-01 | 3                  | 1.00E+00 | 3                  | 1.00E+00 | 2                  | 1.00E+00 | 2                  | 1.00E+00 |
| INPP5J   | 22  | 4                  | 6.65E-01 | 4                  | 6.65E-01 | 2                  | 1.00E+00 | 2                  | 1.00E+00 | 3                  | 1.00E+00 | 3                  | 1.00E+00 |
| ZNF256   | 19  | 2                  | 4.74E-01 | 2                  | 4.74E-01 | 2                  | 1.00E+00 | 2                  | 1.00E+00 | 1                  | 1.00E+00 | 1                  | 1.00E+00 |
| FAM187B  | 19  | 2                  | 3.10E-01 | 3                  | 3.10E-01 | 2                  | 1.00E+00 | 3                  | 1.00E+00 | 1                  | 1.00E+00 | 2                  | 1.00E+00 |
| PLEKHA7  | 11  | 2                  | 1.20E-01 | 2                  | 1.20E-01 | 2                  | 1.00E+00 | 2                  | 1.00E+00 | 1                  | 1.00E+00 | 1                  | 1.00E+00 |
| CRELD2   | 22  | 5                  | 7.97E-01 | 6                  | 8.31E-01 | 4                  | 1.00E+00 | 5                  | 1.00E+00 | 2                  | 1.00E+00 | 3                  | 1.00E+00 |
| KRT20    | 17  | 3                  | 8.18E-01 | 3                  | 8.18E-01 | 3                  | 1.00E+00 | 3                  | 1.00E+00 | 2                  | 1.00E+00 | 2                  | 1.00E+00 |
| CLCC1    | 1   | 1                  | 5.72E-01 | 1                  | 5.72E-01 | 1                  | 1.00E+00 | 1                  | 1.00E+00 | 1                  | 1.00E+00 | 1                  | 1.00E+00 |
| WDR64    | 1   | 4                  | 2.59E-01 | 5                  | 2.75E-01 | 4                  | 1.00E+00 | 5                  | 1.00E+00 | 1                  | 1.00E+00 | 2                  | 1.00E+00 |
| PRIMPOL  | 4   | 7                  | 3.51E-01 | 7                  | 3.51E-01 | 5                  | 1.00E+00 | 5                  | 1.00E+00 | 5                  | 1.00E+00 | 5                  | 1.00E+00 |
| CEP85L   | 6   | 1                  | 7.10E-01 | 1                  | 7.10E-01 | 1                  | 1.00E+00 | 1                  | 1.00E+00 | 1                  | 1.00E+00 | 1                  | 1.00E+00 |
| TANGO6   | 16  | 5                  | 6.34E-01 | 5                  | 6.34E-01 | 5                  | 1.00E+00 | 5                  | 1.00E+00 | 2                  | 1.00E+00 | 2                  | 1.00E+00 |
| MRPS30   | 5   | 4                  | 7.53E-01 | 4                  | 7.53E-01 | 3                  | 1.00E+00 | 3                  | 1.00E+00 | 2                  | 1.00E+00 | 2                  | 1.00E+00 |
| C8orf76  | 8   | 1                  | 3.62E-01 | 1                  | 3.62E-01 | 1                  | 1.00E+00 | 1                  | 1.00E+00 | 1                  | 1.00E+00 | 1                  | 1.00E+00 |

| SetID     | Chr | ADEH- vs NA        |          |                    |          | ADEH+ vs ADEH-     |          |                    |          | ADEH+ vs NA        |          |                    |          |
|-----------|-----|--------------------|----------|--------------------|----------|--------------------|----------|--------------------|----------|--------------------|----------|--------------------|----------|
|           |     | rarenovel          |          | all                |          | rarenovel          |          | all                |          | rarenovel          |          | all                |          |
|           |     | N variants in test | p-value  | N variants in test | p-value  | N variants in test | p-value  | N variants in test | p-value  | N variants in test | p-value  | N variants in test | p-value  |
| SH3BP2    | 4   | 7                  | 1.00E+00 | 7                  | 1.00E+00 | 6                  | 1.00E+00 | 6                  | 1.00E+00 | 4                  | 1.00E+00 | 4                  | 1.00E+00 |
| TCERG1L   | 10  | 4                  | 5.70E-01 | 4                  | 5.70E-01 | 3                  | 1.00E+00 | 3                  | 1.00E+00 | 3                  | 1.00E+00 | 3                  | 1.00E+00 |
| IL17RE    | 3   | 2                  | 1.00E+00 | 2                  | 1.00E+00 | 2                  | 1.00E+00 | 2                  | 1.00E+00 | 1                  | 1.00E+00 | 1                  | 1.00E+00 |
| PCSK4     | 19  | 5                  | 5.01E-01 | 5                  | 5.01E-01 | 3                  | 1.00E+00 | 3                  | 1.00E+00 | 3                  | 1.00E+00 | 3                  | 1.00E+00 |
| TEX26     | 13  | 5                  | 1.00E+00 | 5                  | 1.00E+00 | 4                  | 1.00E+00 | 4                  | 1.00E+00 | 3                  | 1.00E+00 | 3                  | 1.00E+00 |
| PTCHD3    | 10  | 3                  | 6.31E-01 | 5                  | 6.27E-01 | 1                  | 1.00E+00 | 3                  | 1.00E+00 | 3                  | 1.00E+00 | 5                  | 1.00E+00 |
| C1QTNF6   | 22  | 2                  | 3.28E-01 | 2                  | 3.28E-01 | 1                  | 1.00E+00 | 1                  | 1.00E+00 | 2                  | 1.00E+00 | 2                  | 1.00E+00 |
| EPS15     | 1   | 5                  | 2.69E-01 | 5                  | 2.69E-01 | 3                  | 1.00E+00 | 3                  | 1.00E+00 | 3                  | 1.00E+00 | 3                  | 1.00E+00 |
| FSCN2     | 17  | 3                  | 1.81E-01 | 3                  | 1.81E-01 | 2                  | 1.00E+00 | 2                  | 1.00E+00 | 2                  | 1.00E+00 | 2                  | 1.00E+00 |
| HCLS1     | 3   | 3                  | 7.66E-01 | 3                  | 7.66E-01 | 2                  | 1.00E+00 | 2                  | 1.00E+00 | 3                  | 1.00E+00 | 3                  | 1.00E+00 |
| SLC25A45  | 11  | 2                  | 4.88E-01 | 2                  | 4.88E-01 | 2                  | 1.00E+00 | 2                  | 1.00E+00 | 2                  | 1.00E+00 | 2                  | 1.00E+00 |
| MTUS2     | 13  | 6                  | 7.97E-01 | 6                  | 7.97E-01 | 4                  | 1.00E+00 | 4                  | 1.00E+00 | 3                  | 1.00E+00 | 3                  | 1.00E+00 |
| ARHGEF26  | 3   | 2                  | 7.18E-01 | 2                  | 7.18E-01 | 2                  | 1.00E+00 | 2                  | 1.00E+00 | 1                  | 1.00E+00 | 1                  | 1.00E+00 |
| IRF8      | 16  | 1                  | 2.26E-01 | 1                  | 2.26E-01 | 1                  | 1.00E+00 | 1                  | 1.00E+00 |                    |          |                    |          |
| APOH      | 17  | 1                  | 1.00E+00 | 2                  | 3.25E-01 | 1                  | 1.00E+00 | 2                  | 1.00E+00 | 1                  | 1.00E+00 | 2                  | 1.00E+00 |
| OR5B17    | 11  | 2                  | 1.00E+00 | 2                  | 1.00E+00 | 2                  | 1.00E+00 | 2                  | 1.00E+00 | 1                  | 1.00E+00 | 1                  | 1.00E+00 |
| STX5      | 11  | 3                  | 4.77E-01 | 3                  | 4.77E-01 | 2                  | 1.00E+00 | 2                  | 1.00E+00 | 2                  | 1.00E+00 | 2                  | 1.00E+00 |
| DEF6      | 6   | 1                  | 3.05E-01 | 1                  | 3.05E-01 | 1                  | 1.00E+00 | 1                  | 1.00E+00 | 1                  | 1.00E+00 | 1                  | 1.00E+00 |
| KCTD19    | 16  | 2                  | 7.75E-01 | 2                  | 7.75E-01 | 2                  | 1.00E+00 | 2                  | 1.00E+00 | 2                  | 1.00E+00 | 2                  | 1.00E+00 |
| ZNF559    | 19  | 6                  | 7.35E-01 | 6                  | 7.35E-01 | 5                  | 1.00E+00 | 5                  | 1.00E+00 | 3                  | 1.00E+00 | 3                  | 1.00E+00 |
| GFAP      | 17  | 3                  | 1.00E+00 | 3                  | 1.00E+00 | 3                  | 1.00E+00 | 3                  | 1.00E+00 | 2                  | 1.00E+00 | 2                  | 1.00E+00 |
| COQ4      | 9   | 2                  | 2.69E-01 | 2                  | 2.69E-01 | 1                  | 1.00E+00 | 1                  | 1.00E+00 | 2                  | 1.00E+00 | 2                  | 1.00E+00 |
| LRRFIP1   | 2   | 1                  | 1.66E-01 | 1                  | 1.66E-01 | 1                  | 1.00E+00 | 1                  | 1.00E+00 |                    |          |                    |          |
| CATSPERD  | 19  | 3                  | 1.45E-01 | 3                  | 1.45E-01 | 1                  | 1.00E+00 | 1                  | 1.00E+00 | 3                  | 1.00E+00 | 3                  | 1.00E+00 |
| TACR1     | 2   | 1                  | 1.64E-01 | 1                  | 1.64E-01 | 1                  | 1.00E+00 | 1                  | 1.00E+00 |                    |          |                    |          |
| KRTAP27-1 | 21  | 2                  | 1.56E-01 | 2                  | 1.56E-01 | 2                  | 1.00E+00 | 2                  | 1.00E+00 | 1                  | 1.00E+00 | 1                  | 1.00E+00 |
| TPRG1L    | 1   | 1                  | 1.60E-01 | 1                  | 1.60E-01 | 1                  | 1.00E+00 | 1                  | 1.00E+00 |                    |          |                    |          |
| NDUFA10   | 2   | 3                  | 6.09E-01 | 4                  | 6.45E-01 | 2                  | 1.00E+00 | 3                  | 1.00E+00 | 2                  | 1.00E+00 | 3                  | 1.00E+00 |
| ROBO4     | 11  | 5                  | 2.01E-01 | 5                  | 2.01E-01 | 5                  | 1.00E+00 | 5                  | 1.00E+00 | 1                  | 1.00E+00 | 1                  | 1.00E+00 |
| GADL1     | 3   | 3                  | 2.21E-01 | 3                  | 2.21E-01 | 3                  | 1.00E+00 | 3                  | 1.00E+00 | 1                  | 1.00E+00 | 1                  | 1.00E+00 |
| SCP2D1    | 20  | 3                  | 4.16E-01 | 3                  | 4.16E-01 | 3                  | 1.00E+00 | 3                  | 1.00E+00 | 2                  | 1.00E+00 | 2                  | 1.00E+00 |
| PIGL      | 17  | 1                  | 2.36E-01 | 1                  | 2.36E-01 | 1                  | 1.00E+00 | 1                  | 1.00E+00 |                    |          |                    |          |
| TUSC5     | 17  | 1                  | 2.86E-01 | 1                  | 2.86E-01 | 1                  | 1.00E+00 | 1                  | 1.00E+00 | 1                  | 1.00E+00 | 1                  | 1.00E+00 |
| FAM26E    | 6   | 2                  | 4.77E-01 | 2                  | 4.77E-01 | 2                  | 1.00E+00 | 2                  | 1.00E+00 | 1                  | 1.00E+00 | 1                  | 1.00E+00 |
| CALML4    | 15  | 4                  | 4.09E-01 | 4                  | 4.09E-01 | 2                  | 1.00E+00 | 2                  | 1.00E+00 | 4                  | 1.00E+00 | 4                  | 1.00E+00 |
| RAB21     | 12  | 1                  | 3.10E-01 | 1                  | 3.10E-01 | 1                  | 1.00E+00 | 1                  | 1.00E+00 | 1                  | 1.00E+00 | 1                  | 1.00E+00 |
| MPP3      | 17  | 2                  | 3.28E-01 | 3                  | 3.73E-01 | 2                  | 1.00E+00 | 3                  | 1.00E+00 | 1                  | 1.00E+00 | 2                  | 1.00E+00 |
| GPR37     | 7   | 2                  | 3.28E-01 | 2                  | 3.28E-01 | 2                  | 1.00E+00 | 2                  | 1.00E+00 | 1                  | 1.00E+00 | 1                  | 1.00E+00 |
| ADAMTS8   | 11  | 4                  | 3.54E-01 | 4                  | 3.54E-01 | 4                  | 1.00E+00 | 4                  | 1.00E+00 | 2                  | 1.00E+00 | 2                  | 1.00E+00 |
| IFFO1     | 12  | 5                  | 3.55E-01 | 5                  | 3.55E-01 | 4                  | 1.00E+00 | 4                  | 1.00E+00 | 2                  | 1.00E+00 | 2                  | 1.00E+00 |
| TRIML1    | 4   | 1                  | 4.80E-01 | 1                  | 4.80E-01 | 1                  | 1.00E+00 | 1                  | 1.00E+00 | 1                  | 1.00E+00 | 1                  | 1.00E+00 |
| OR51L1    | 11  | 2                  | 4.61E-01 | 2                  | 4.61E-01 | 2                  | 1.00E+00 | 2                  | 1.00E+00 | 1                  | 1.00E+00 | 1                  | 1.00E+00 |
| CCDC185   | 1   | 2                  | 3.78E-01 | 2                  | 3.78E-01 | 1                  | 1.00E+00 | 1                  | 1.00E+00 | 2                  | 1.00E+00 | 2                  | 1.00E+00 |
| WDR20     | 14  | 3                  | 4.25E-01 | 3                  | 4.25E-01 | 2                  | 1.00E+00 | 2                  | 1.00E+00 | 2                  | 1.00E+00 | 2                  | 1.00E+00 |
| AKR1C3    | 10  | 5                  | 7.02E-01 | 5                  | 7.02E-01 | 6                  | 1.00E+00 | 6                  | 1.00E+00 | 3                  | 1.00E+00 | 3                  | 1.00E+00 |
| AHSG      | 3   | 1                  | 4.71E-01 | 1                  | 4.71E-01 | 1                  | 1.00E+00 | 1                  | 1.00E+00 | 1                  | 1.00E+00 | 1                  | 1.00E+00 |
| KIRREL2   | 19  | 3                  | 6.27E-01 | 3                  | 6.27E-01 | 2                  | 1.00E+00 | 2                  | 1.00E+00 | 2                  | 1.00E+00 | 2                  | 1.00E+00 |
| VCPKMT    | 14  | 3                  | 4.46E-01 | 3                  | 4.46E-01 | 3                  | 1.00E+00 | 3                  | 1.00E+00 | 1                  | 1.00E+00 | 1                  | 1.00E+00 |

| SetID   | Chr | ADEH- vs NA        |          |                    |          | ADEH+ vs ADEH-     |          |                    |          | ADEH+ vs NA        |          |                    |          |
|---------|-----|--------------------|----------|--------------------|----------|--------------------|----------|--------------------|----------|--------------------|----------|--------------------|----------|
|         |     | rarenovel          |          | all                |          | rarenovel          |          | all                |          | rarenovel          |          | all                |          |
|         |     | N variants in test | p-value  | N variants in test | p-value  | N variants in test | p-value  | N variants in test | p-value  | N variants in test | p-value  | N variants in test | p-value  |
| SAT2    | 17  |                    |          | 1                  | 4.56E-01 |                    |          | 1                  | 1.00E+00 |                    |          | 1                  | 1.00E+00 |
| ASH2L   | 8   | 1                  | 4.59E-01 | 1                  | 4.59E-01 | 1                  | 1.00E+00 | 1                  | 1.00E+00 | 1                  | 1.00E+00 | 1                  | 1.00E+00 |
| IRGM    | 5   | 1                  | 4.69E-01 | 1                  | 4.69E-01 | 1                  | 1.00E+00 | 1                  | 1.00E+00 | 1                  | 1.00E+00 | 1                  | 1.00E+00 |
| ZMIZ2   | 7   | 1                  | 1.00E+00 | 2                  | 1.00E+00 | 1                  | 1.00E+00 | 2                  | 1.00E+00 | 1                  | 1.00E+00 | 2                  | 1.00E+00 |
| TAS2R14 | 12  | 1                  | 4.73E-01 | 1                  | 4.73E-01 | 1                  | 1.00E+00 | 1                  | 1.00E+00 | 1                  | 1.00E+00 | 1                  | 1.00E+00 |
| LPAR6   | 13  | 2                  | 7.35E-01 | 2                  | 7.35E-01 | 2                  | 1.00E+00 | 2                  | 1.00E+00 | 1                  | 1.00E+00 | 1                  | 1.00E+00 |
| PIGS    | 17  | 5                  | 4.83E-01 | 5                  | 4.83E-01 | 2                  | 1.00E+00 | 2                  | 1.00E+00 | 4                  | 1.00E+00 | 4                  | 1.00E+00 |
| SLC17A4 | 6   | 3                  | 5.04E-01 | 3                  | 5.04E-01 | 2                  | 1.00E+00 | 2                  | 1.00E+00 | 2                  | 1.00E+00 | 2                  | 1.00E+00 |
| CRISP2  | 6   | 2                  | 5.50E-01 | 2                  | 5.50E-01 | 2                  | 1.00E+00 | 2                  | 1.00E+00 | 1                  | 1.00E+00 | 1                  | 1.00E+00 |
| C2orf61 | 2   | 1                  | 1.00E+00 | 1                  | 1.00E+00 | 1                  | 1.00E+00 | 1                  | 1.00E+00 | 1                  | 1.00E+00 | 1                  | 1.00E+00 |
| FLVCR2  | 14  | 3                  | 7.19E-01 | 3                  | 7.19E-01 | 3                  | 1.00E+00 | 3                  | 1.00E+00 | 1                  | 1.00E+00 | 1                  | 1.00E+00 |
| ANGPTL8 | 19  | 2                  | 1.00E+00 | 2                  | 1.00E+00 | 2                  | 1.00E+00 | 2                  | 1.00E+00 | 2                  | 1.00E+00 | 2                  | 1.00E+00 |
| NT5C    | 17  | 2                  | 5.82E-01 | 2                  | 5.82E-01 | 2                  | 1.00E+00 | 2                  | 1.00E+00 | 1                  | 1.00E+00 | 1                  | 1.00E+00 |
| PSMA8   | 18  | 2                  | 5.99E-01 | 2                  | 5.99E-01 | 2                  | 1.00E+00 | 2                  | 1.00E+00 | 1                  | 1.00E+00 | 1                  | 1.00E+00 |
| MRPS34  | 16  | 4                  | 6.00E-01 | 4                  | 6.00E-01 | 4                  | 1.00E+00 | 4                  | 1.00E+00 | 3                  | 1.00E+00 | 3                  | 1.00E+00 |
| TNIP2   | 4   | 1                  | 6.19E-01 | 1                  | 6.19E-01 | 1                  | 1.00E+00 | 1                  | 1.00E+00 | 1                  | 1.00E+00 | 1                  | 1.00E+00 |
| STX2    | 12  | 1                  | 6.56E-01 | 1                  | 6.56E-01 | 1                  | 1.00E+00 | 1                  | 1.00E+00 | 1                  | 1.00E+00 | 1                  | 1.00E+00 |
| ZNF480  | 19  | 3                  | 8.14E-01 | 3                  | 8.14E-01 | 3                  | 1.00E+00 | 3                  | 1.00E+00 | 1                  | 1.00E+00 | 1                  | 1.00E+00 |
| OR2B3   | 6   | 1                  | 6.59E-01 | 1                  | 6.59E-01 | 1                  | 1.00E+00 | 1                  | 1.00E+00 | 1                  | 1.00E+00 | 1                  | 1.00E+00 |
| TEAD3   | 6   | 2                  | 7.60E-01 | 2                  | 7.60E-01 | 2                  | 1.00E+00 | 2                  | 1.00E+00 | 1                  | 1.00E+00 | 1                  | 1.00E+00 |
| SLC2A14 | 12  | 3                  | 7.74E-01 | 3                  | 7.74E-01 | 2                  | 1.00E+00 | 2                  | 1.00E+00 | 2                  | 1.00E+00 | 2                  | 1.00E+00 |
| DHODH   | 16  | 4                  | 7.20E-01 | 4                  | 7.20E-01 | 4                  | 1.00E+00 | 4                  | 1.00E+00 | 1                  | 1.00E+00 | 1                  | 1.00E+00 |
| C6orf10 | 6   | 3                  | 8.10E-01 | 4                  | 7.21E-01 | 2                  | 1.00E+00 | 3                  | 1.00E+00 | 3                  | 1.00E+00 | 4                  | 1.00E+00 |
| CCL26   | 7   | 1                  | 7.27E-01 | 1                  | 7.27E-01 | 1                  | 1.00E+00 | 1                  | 1.00E+00 | 1                  | 1.00E+00 | 1                  | 1.00E+00 |
| GANAB   | 11  | 4                  | 7.30E-01 | 4                  | 7.30E-01 | 3                  | 1.00E+00 | 3                  | 1.00E+00 | 2                  | 1.00E+00 | 2                  | 1.00E+00 |
| CCDC94  | 19  | 1                  | 7.31E-01 | 1                  | 7.31E-01 | 1                  | 1.00E+00 | 1                  | 1.00E+00 | 1                  | 1.00E+00 | 1                  | 1.00E+00 |
| TSACC   | 1   | 2                  | 1.00E+00 | 2                  | 1.00E+00 | 2                  | 1.00E+00 | 2                  | 1.00E+00 | 2                  | 1.00E+00 | 2                  | 1.00E+00 |
| PIH1D2  | 11  | 1                  | 7.41E-01 | 1                  | 7.41E-01 | 1                  | 1.00E+00 | 1                  | 1.00E+00 | 1                  | 1.00E+00 | 1                  | 1.00E+00 |
| COMMD1  | 2   | 2                  | 7.47E-01 | 2                  | 7.47E-01 | 2                  | 1.00E+00 | 2                  | 1.00E+00 | 1                  | 1.00E+00 | 1                  | 1.00E+00 |
| CTH     | 1   | 2                  | 7.63E-01 | 2                  | 7.63E-01 | 1                  | 1.00E+00 | 1                  | 1.00E+00 | 2                  | 1.00E+00 | 2                  | 1.00E+00 |
| EFHD1   | 2   | 1                  | 7.68E-01 | 1                  | 7.68E-01 | 1                  | 1.00E+00 | 1                  | 1.00E+00 | 1                  | 1.00E+00 | 1                  | 1.00E+00 |
| DDX55   | 12  | 3                  | 7.73E-01 | 3                  | 7.73E-01 | 2                  | 1.00E+00 | 2                  | 1.00E+00 | 2                  | 1.00E+00 | 2                  | 1.00E+00 |
| TMEM71  | 8   | 2                  | 1.00E+00 | 2                  | 1.00E+00 | 2                  | 1.00E+00 | 2                  | 1.00E+00 | 2                  | 1.00E+00 | 2                  | 1.00E+00 |
| CORO6   | 17  | 1                  | 7.81E-01 | 1                  | 7.81E-01 | 1                  | 1.00E+00 | 1                  | 1.00E+00 | 1                  | 1.00E+00 | 1                  | 1.00E+00 |
| TTC5    | 14  | 2                  | 7.84E-01 | 2                  | 7.84E-01 | 1                  | 1.00E+00 | 1                  | 1.00E+00 | 2                  | 1.00E+00 | 2                  | 1.00E+00 |
| SMYD1   | 2   | 4                  | 7.90E-01 | 4                  | 7.90E-01 | 3                  | 1.00E+00 | 3                  | 1.00E+00 | 2                  | 1.00E+00 | 2                  | 1.00E+00 |
| RIT2    | 18  | 1                  | 7.98E-01 | 1                  | 7.98E-01 | 1                  | 1.00E+00 | 1                  | 1.00E+00 | 1                  | 1.00E+00 | 1                  | 1.00E+00 |
| SLC47A2 | 17  | 5                  | 7.99E-01 | 5                  | 7.99E-01 | 3                  | 1.00E+00 | 3                  | 1.00E+00 | 4                  | 1.00E+00 | 4                  | 1.00E+00 |
| ZNF785  | 16  | 1                  | 8.04E-01 | 1                  | 8.04E-01 | 1                  | 1.00E+00 | 1                  | 1.00E+00 | 1                  | 1.00E+00 | 1                  | 1.00E+00 |
| ZNF763  | 19  | 5                  | 8.20E-01 | 5                  | 8.20E-01 | 3                  | 1.00E+00 | 3                  | 1.00E+00 | 5                  | 1.00E+00 | 5                  | 1.00E+00 |
| FAM216A | 12  | 1                  | 8.14E-01 | 1                  | 8.14E-01 | 1                  | 1.00E+00 | 1                  | 1.00E+00 | 1                  | 1.00E+00 | 1                  | 1.00E+00 |
| WDFY2   | 13  | 2                  | 1.00E+00 | 2                  | 1.00E+00 | 2                  | 1.00E+00 | 2                  | 1.00E+00 | 1                  | 1.00E+00 | 1                  | 1.00E+00 |
| ZNF80   | 3   | 1                  | 8.37E-01 | 2                  | 1.00E+00 | 1                  | 1.00E+00 | 2                  | 1.00E+00 | 1                  | 1.00E+00 | 2                  | 1.00E+00 |
| ZPBP2   | 17  | 2                  | 8.49E-01 | 2                  | 8.49E-01 | 2                  | 1.00E+00 | 2                  | 1.00E+00 | 1                  | 1.00E+00 | 1                  | 1.00E+00 |
| SMCO3   | 12  | 3                  | 8.49E-01 | 3                  | 8.49E-01 | 2                  | 1.00E+00 | 2                  | 1.00E+00 | 2                  | 1.00E+00 | 2                  | 1.00E+00 |
| ASCC1   | 10  | 2                  | 8.65E-01 | 2                  | 8.65E-01 | 1                  | 1.00E+00 | 1                  | 1.00E+00 | 2                  | 1.00E+00 | 2                  | 1.00E+00 |
| GALR2   | 17  | 3                  | 8.73E-01 | 3                  | 8.73E-01 | 3                  | 1.00E+00 | 3                  | 1.00E+00 | 1                  | 1.00E+00 | 1                  | 1.00E+00 |
| MLC1    | 22  | 5                  | 1.00E+00 | 5                  | 1.00E+00 | 4                  | 1.00E+00 | 4                  | 1.00E+00 | 2                  | 1.00E+00 | 2                  | 1.00E+00 |
