# Supplementary material
Source: PubMed Central journal article supplement (PMC8978872)
Supplement: NIHMS1786777-supplement-Supplemental_2.pdf [file NIHMS1786777-supplement-Supplemental_2.pdf]

**Fig E1.** Flowchart of sample QC and exclusions.

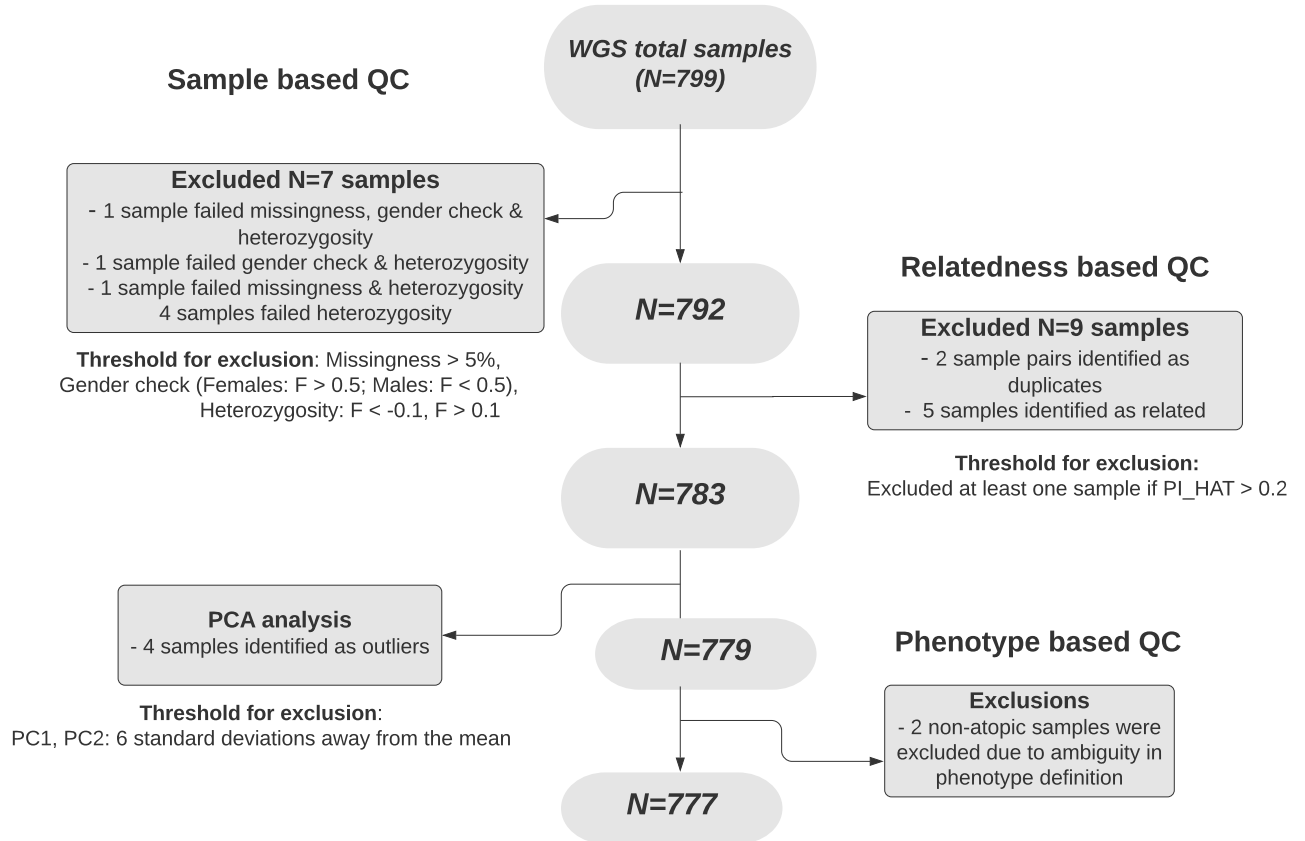

**Fig E2.** Scree plot of the first ten principal components generated from smart PCA

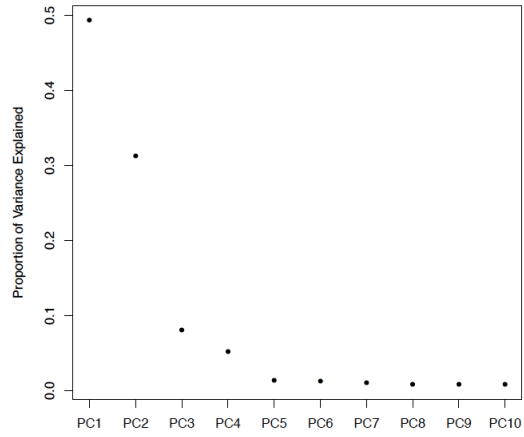

**Fig E3.** Scatter plots of the first five principal components colored by sequencing batch

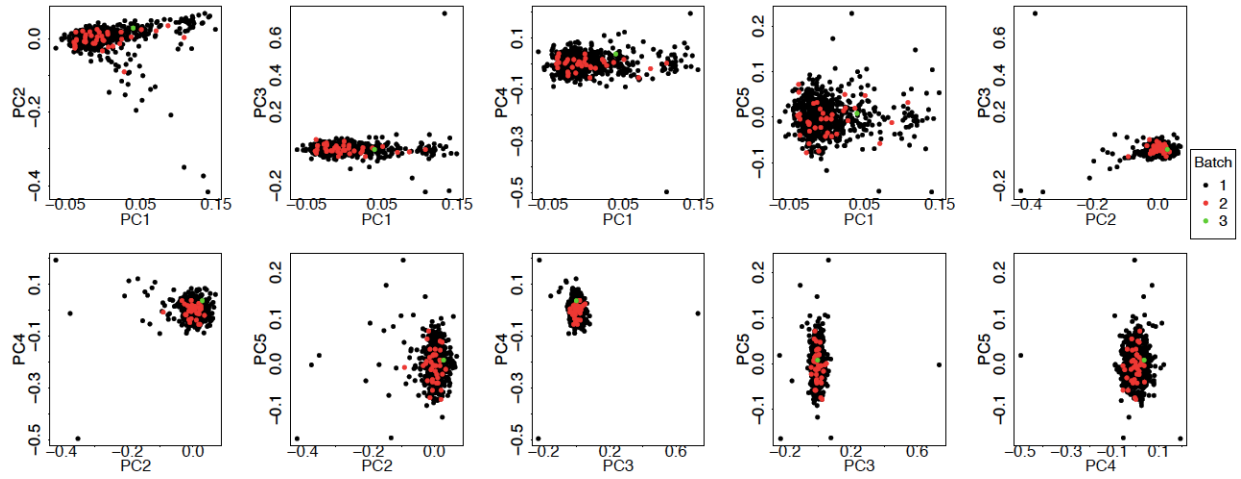

**Fig E4.** Genome wide gene-based tests performed to identify genes harboring damaging variants that determine eczema herpeticum. Results are presented as Q-Q plots for genome wide gene-based tests, and colored dots indicate the 8 genes moved forward to functional follow up; the genes had to meet the threshold of  $p < 0001$  in the comparison of ADEH+ vs. ADEH- (left column) or ADEH+ vs. NA (middle column), but not in the comparison of ADEH- to NA (right column).

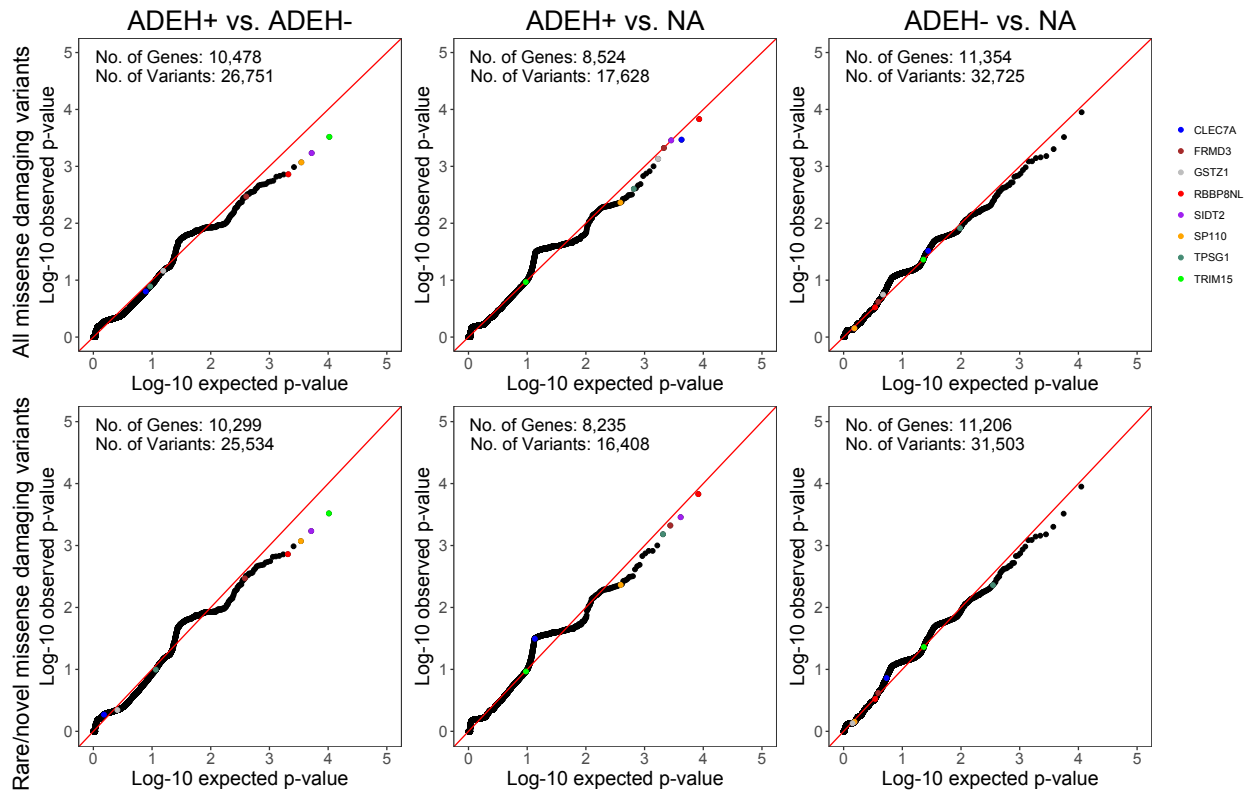

**Figure E5.** Gene expression of six candidate genes in NHPK in the presence and absence of HSV-1. Data are presented as mean  $\pm$  SD, n=3.

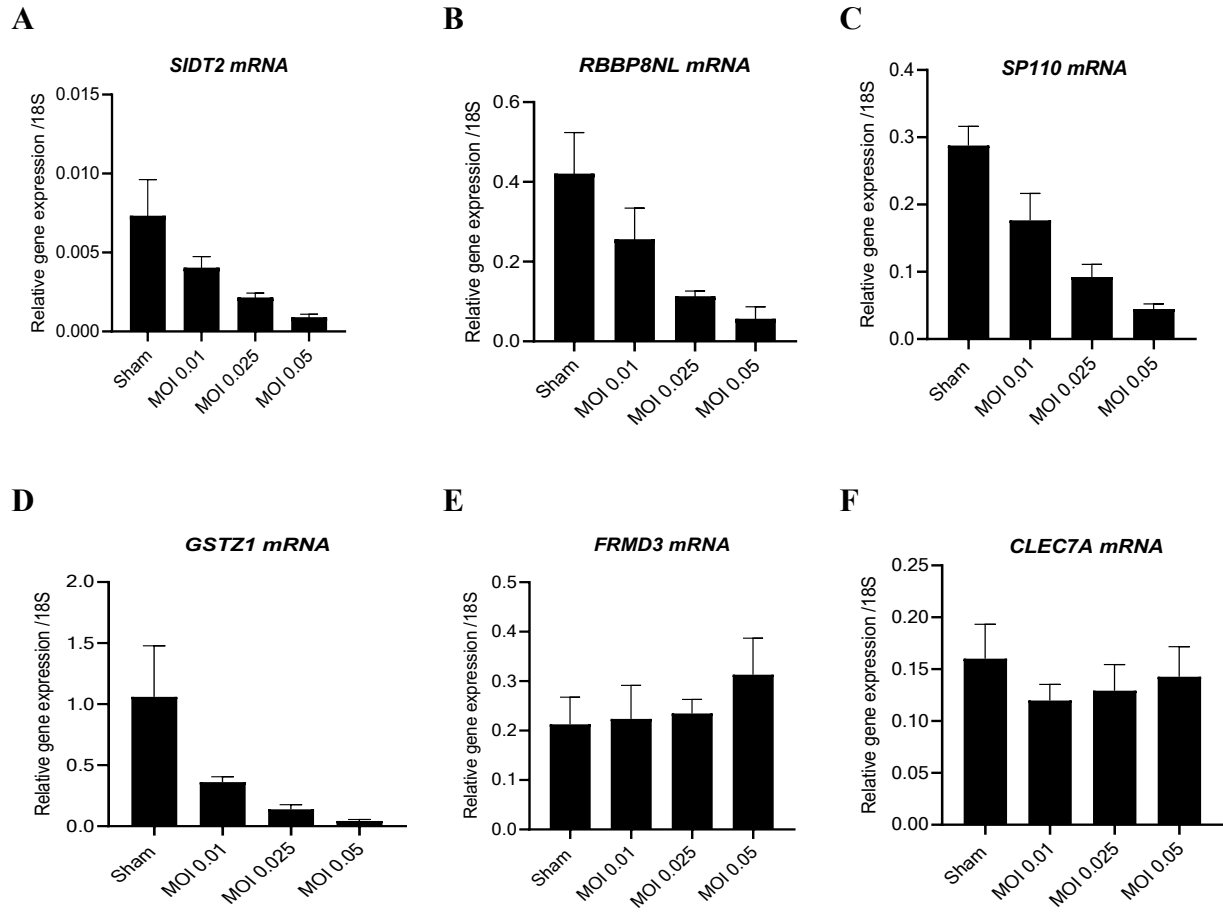

**Figure E6.** Gene expression of six candidate genes in NHEK treated with scrambled and specific gene siRNA in the presence and absence of HSV-1 (24 hours after infection). Data are presented as mean  $\pm$  SD, n=3.

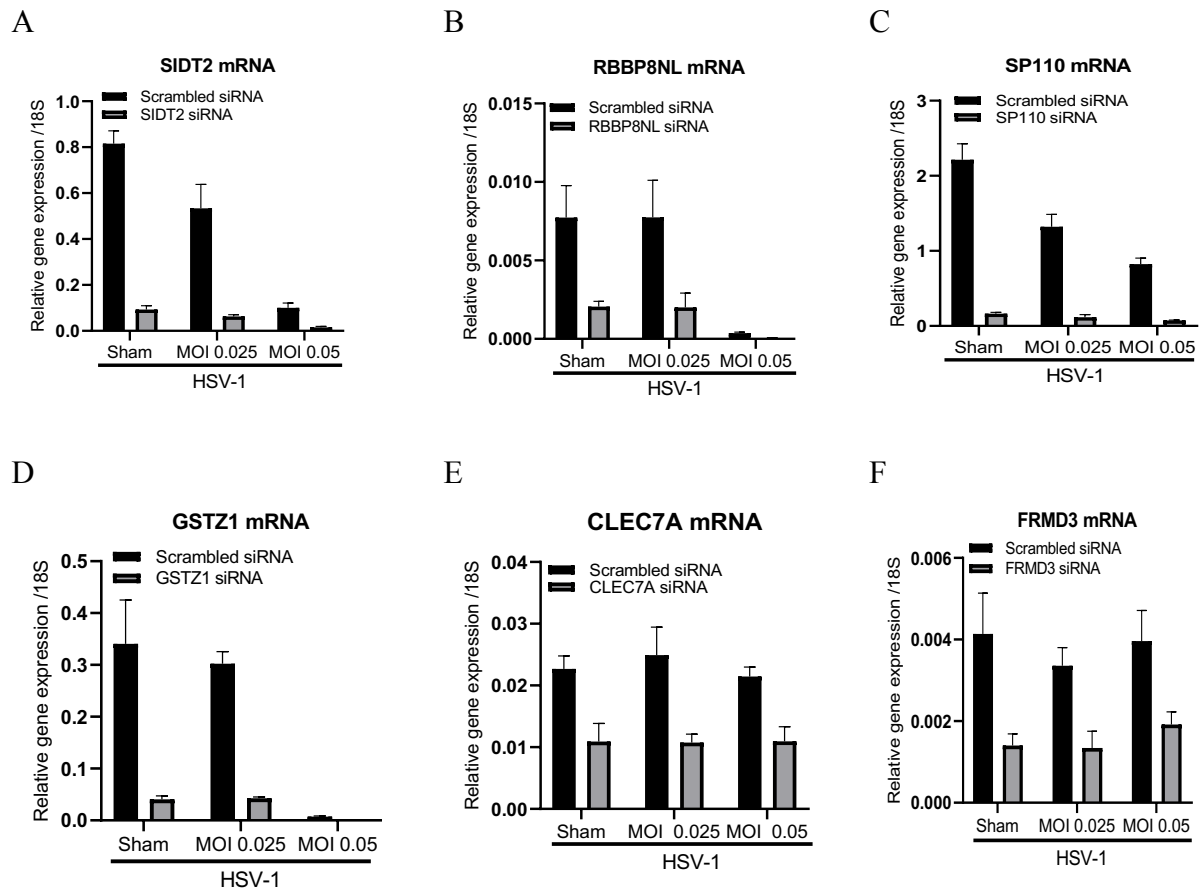

**Figure E7. IFN $\beta$ 1 gene expression wasn't altered in *SIDT2*- and *RBBP8NL*-silenced NHPK upon HSV-1 stimulation.** (A) *SIDT2* gene expression; (B) *IFN $\beta$ 1* gene expression in *SIDT2* –silenced NHPK compared to scrambled siRNA treated NHPK; (C) *RBBP8NL* gene expression; (D) *IFN $\beta$ 1* gene expression in *RBBP8NL* –silenced NHPK compared to scrambled siRNA treated NHPK; Data of three independent experiments combined. Comparisons of log-transformed relative gene expression values between specific gene siRNA and scrambled siRNA under varying MOI were made using t-tests. Statistical significance is represented as ns = not significant, \* $p < 0.05$  and \*\* $p < 0.01$ .

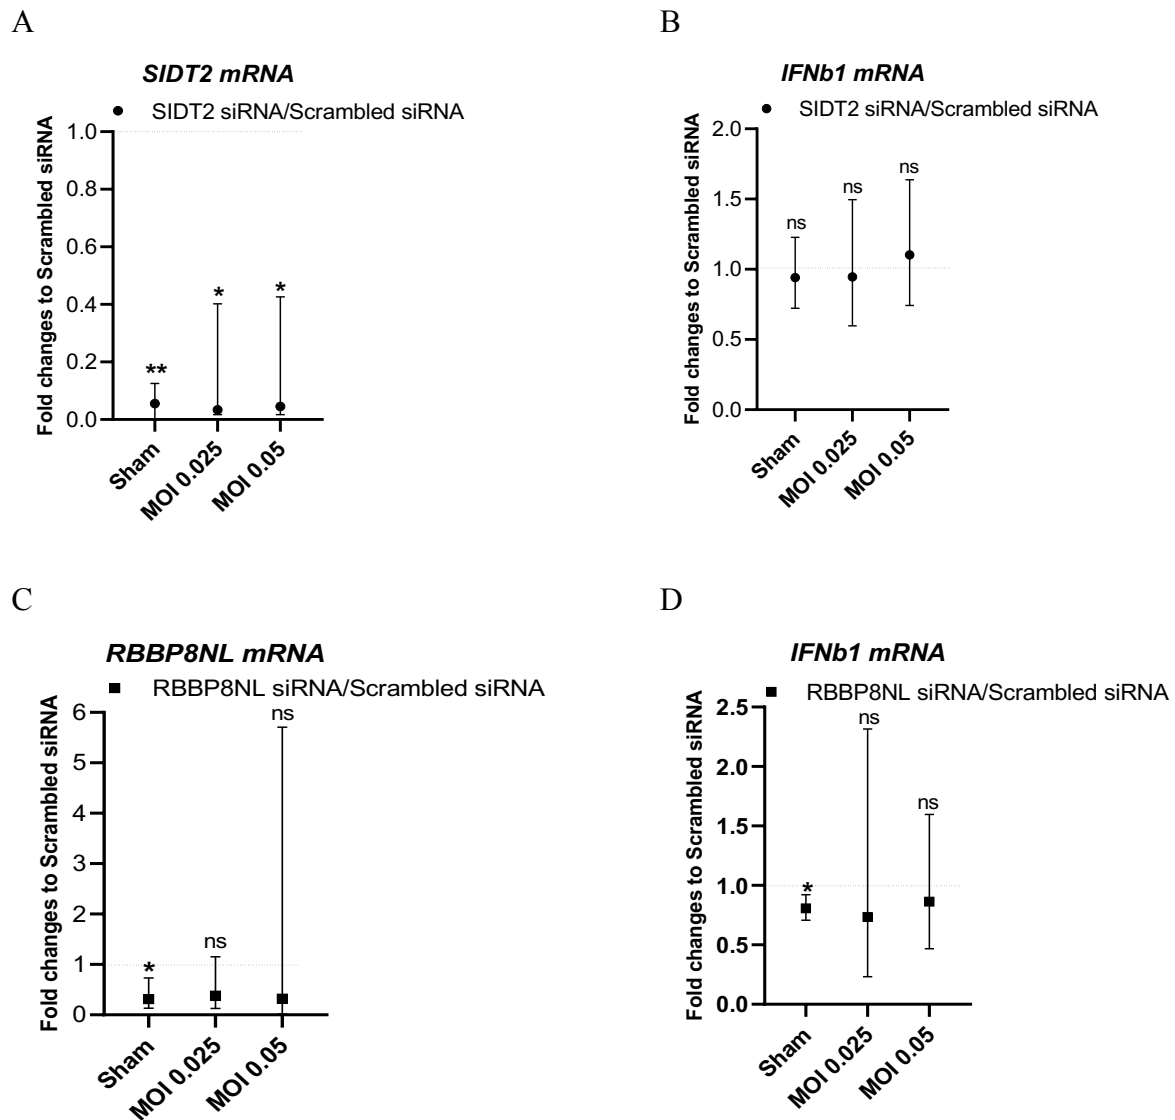

**Table E1.** On target siRNA sequences

| Gene      | ON-TARGETplus SMARTpool siRNA sequences                 |                                                         |
|-----------|---------------------------------------------------------|---------------------------------------------------------|
| SIDT2     | 5'-CCAAGAACGUCUCGCAGAA-3',<br>5'-CCAUCACCGUACAGCGCAA-3' | 5'-GCAACAGGACAGAGGGCGU-3',<br>5'-ACAAGCGUGUUCUGCGGAA-3' |
| SP110     | 5'-GGAGAAAGAUUUCUGUUA-3',<br>5'-GAGGAUGGAACUUGGUUA-3'   | 5'-CAAUUAACCUGCGUGAAU-3',<br>5'-AAAGAUGACUCAACUUGUA-3'  |
| RBBP8NL   | 5'-GGACAUCUCCAGUGGCCAA-3',<br>5'-CCAACGAGAUGAACGGGCU-3' | 5'-GACCAGAGUCCGACGAACU-3',<br>5'-CGGCAGCAGGAGUUCGAGA-3' |
| CLEC7A    | 5'-CAGGAUAGCUGUUGUUUA-3',<br>5'-GAAGAUGGAUUAACUCAA-3'   | 5'-GGAUGAAGAUGGAUUAUACU-3',<br>5'-CUUCGACUCUCAAGCAAU-3' |
| FRMD3     | 5'-GGAAGUAGAUUUCGAUUA-3',<br>5'-GAACUAGUGUACAACCAA-3'   | 5'-UUUCGGAGCUCCAGCGUCA-3',<br>5'-CAUGAACCCUUGAAGAUUA-3' |
| TPSG1     | 5'-UGAAAGUCUCCGUGGUGGA-3',<br>5'-CCCUGAACUCAUCCGACUA-3' | 5'-GCAGCAUCCUUCAGCCCGA-3',<br>5'-CGGCCUCUCCUUCUGCUA-3'  |
| GSTZ1     | 5'-GCACAGCGGGCAUUAUCUG-3',<br>5'-GACCAUGGCUGAUCUGUGC-3' | 5'-CCACUGAGCUGAGGGCCUA-3',<br>5'-GGCAAUUGCUGAAAGAUUC-3' |
| TRIM15    | 5'-GGGAGAAACUUACUGCGAG-3',<br>5'-CCCUGAAGGUGGUCCAUGA-3' | 5'-GCGAGAACGAUGCCGAGUU-3',<br>5'-GCAGAACCACAGACGGCUU-3' |
| Scrambled | 5'-UGGUUUACAUGUCGACUAA-3',<br>5'-UGGUUUACAUGUUUCUGA-3'  | 5'-UGGUUUACAUGUUGUGUGA-3',<br>5'-UGGUUUACAUGUUUCCUA-3'  |

**Table E2.** Primers used for examination of gene silencing efficiency

| Gene name      | Primers purchased from Applied Biosystems |
|----------------|-------------------------------------------|
| <i>RBBP8NL</i> | Hs00293019_m1                             |
| <i>SIDT2</i>   | Hs00211141_m1                             |
| <i>SP110</i>   | Hs00893490_m1                             |
| <i>TRIM15</i>  | Hs00264400_m1                             |
| <i>CLEC7A</i>  | Hs01902549_S1                             |
| <i>FRMD3</i>   | Hs00604157_m1                             |
| <i>TPSG1</i>   | Hs01550477_g1                             |
| <i>GSTZ1</i>   | Hs01041668_m1                             |

**Table E4A.** Association analysis results for variants of interest focusing on variants previously identified as associated with ADEH+ .

| snp147      | chr:position (hg19) | PMID                      | MAF (ADEH+ ADEH- NA)          | ADEH+ vs ADEH-            | ADEH+ vs NA             | ADEH- vs NA               | Func.refGene              | Gene.refGene                      | AAChange.refGene               |  |
|-------------|---------------------|---------------------------|-------------------------------|---------------------------|-------------------------|---------------------------|---------------------------|-----------------------------------|--------------------------------|--|
|             |                     |                           |                               | OR [95% CI] P-value       | OR [95% CI] P-value     | OR [95% CI] P-value       |                           |                                   |                                |  |
| rs10058453  | chr5:35880820       | 20466416                  | 37.7%<br>32.0%<br>30.3%       | 0.73 [0.5-1.2] 0.1738     | 0.66 [0.4-1.1] 0.0928   | 0.92 [0.7-1.2] 0.5236     | intergenic                | IL7R; CAPSL                       | .                              |  |
| rs10213865  | chr5:35857850       |                           | 33.6%<br>24.2%<br>30.3%       | 1.46 [0.9-2.3] 0.0941     | 1.07 [0.7-1.7] 0.7577   | 0.75 [0.6-1.0] 0.0174     | intronic                  | IL7R                              | .                              |  |
| rs12516866  | chr5:35851261       |                           | 44.9%<br>39.5%<br>44.4%       | 1.19 [0.8-1.8] 0.4093     | 0.96 [0.6-1.5] 0.8645   | 0.82 [0.7-1.0] 0.0790     | intergenic                | SPEF2; IL7R                       | .                              |  |
| rs1389832   | chr5:35858721       |                           | 37.7%<br>32.0%<br>29.9%       | 0.73 [0.5-1.2] 0.1738     | 0.64 [0.4-1.1] 0.0789   | 0.90 [0.7-1.2] 0.4212     | intronic                  | IL7R                              | .                              |  |
| rs1898671   | chr5:110408002      |                           | 27.5%<br>35.9%<br>29.9%       | 0.65 [0.4-1.1] 0.0775     | 0.86 [0.5-1.5] 0.5797   | 1.34 [1.1-1.7] 0.0184     | intronic                  | TSLP                              | .                              |  |
| rs2416259   | chr5:110419742      |                           | excluded from analysis for QC |                           |                         |                           |                           |                                   |                                |  |
| rs17175350  |                     | 26343451                  | Not in our dataset            |                           |                         |                           |                           |                                   |                                |  |
| rs372412638 |                     |                           | Not in our dataset            |                           |                         |                           |                           |                                   |                                |  |
| rs374787981 |                     |                           | Not in our dataset            |                           |                         |                           |                           |                                   |                                |  |
| rs11575936  | chr6:137540425      |                           | 1.02%<br><0.01%<br>0.21%      | 30.23 [0.6-1570.0] 0.0907 | 4.88 [0.2-106.3] 0.3136 | 0.16 [0.0-18.8] 0.3255    | exonic: nonsynonymous SNV | IFNGR1                            | NM_000416:exon1: c.G40A:p.V14M |  |
| rs1327475   | chr6:137536455      | 17.4%<br>15.8%<br>16.2%   | 1.06 [0.6-1.9] 0.8252         | 1.04 [0.6-1.9] 0.8936     | 0.96 [0.7-1.3] 0.8068   | intronic                  | IFNGR1                    | .                                 |                                |  |
| rs17175322  | chr6:137528119      | <0.01%<br><0.01%<br>0.21% | NA                            | 1.60 [0.0-188.1] 1.0000   | 0.16 [0.0-18.8] 0.3255  | exonic: nonsynonymous SNV | IFNGR1                    | NM_000416:exon2: c.G181A:p.V61I   |                                |  |
| rs1887415   | chr6:137519238      | 1.02%<br>0.50%<br><0.01%  | 2.01 [0.4-11.7] 0.4357        | 14.60 [0.3-680.2] 0.1713  | 5.34 [0.5-61.9] 0.1804  | exonic: nonsynonymous SNV | IFNGR1                    | NM_000416:exon7: c.T1400C:p.L467P |                                |  |
| rs11132242  | chr4:185321941      | 39.8%<br>38.7%<br>39.2%   | 1.04 [0.7-1.6] 0.8570         | 1.05 [0.7-1.7] 0.8391     | 0.98 [0.8-1.2] 0.8935   | intronic                  | IRF2                      | .                                 |                                |  |
| rs1124191   | chr4:185302246      | 30.6%<br>26.9%<br>24.0%   | 0.81 [0.5-1.3] 0.3676         | 0.69 [0.4-1.1] 0.1320     | 0.86 [0.7-1.1] 0.2421   | ncRNA_intronic            | LOC102723766              | .                                 |                                |  |
| rs1342852   | chr4:185306117      | 32.6%<br>36.3%<br>37.9%   | 0.88 [0.6-1.4] 0.5881         | 0.80 [0.5-1.3] 0.3477     | 0.93 [0.7-1.2] 0.5153   | intergenic                | LOC102723766; IRF2        | .                                 |                                |  |
| rs17488073  | chr4:185328973      | 12.2%<br>15.3%<br>14.5%   | 0.78 [0.4-1.5] 0.4448         | 0.83 [0.4-1.6] 0.5870     | 1.07 [0.8-1.5] 0.6758   | intronic                  | IRF2                      | .                                 |                                |  |
| rs809909    | chr4:185324610      | 27.5%<br>33.2%<br>34.3%   | 1.29 [0.8-2.1] 0.2941         | 1.36 [0.8-2.2] 0.2332     | 1.06 [0.8-1.3] 0.6474   | intronic                  | IRF2                      | .                                 |                                |  |



**Table E4B.** Association analysis results for variants of interest focusing on variants previously identified as associated with AD.

| snp147      | chr:position (hg19) | MAF<br>(ADEH+<br>ADEH-<br>NA) | ADEH+ vs<br>ADEH-             | ADEH+ vs<br>NA                | ADEH- vs<br>NA              | Func.refGene   | Gene.refGene           |  |
|-------------|---------------------|-------------------------------|-------------------------------|-------------------------------|-----------------------------|----------------|------------------------|--|
|             |                     |                               | OR<br>[95% CI]<br>P-value     | OR<br>[95% CI]<br>P-value     | OR<br>[95% CI]<br>P-value   |                |                        |  |
| rs7512552   | chr1:150265704      | 46.9%<br>43.0%<br>49.7%       | 0.80<br>[0.5-1.3]<br>0.3328   | 1.05<br>[0.7-1.7]<br>0.8218   | NA                          | upstream       | MRPS21                 |  |
| rs61813875  | chr1:152536650      | 10.2%<br>6.32%<br>1.68%       | 1.63<br>[0.8-3.3]<br>0.1731   | 6.62<br>[2.5-17.9]<br>2.0E-04 | NA                          | intergenic     | CRCT1;LCE3E            |  |
| rs6602364   | chr10:6038853       | 45.9%<br>48.5%<br>45.7%       | 0.82<br>[0.5-1.3]<br>0.3671   | 0.75<br>[0.5-1.2]<br>0.2030   | 0.90<br>[0.7-1.1]<br>0.3612 | intergenic     | IL15RA;IL2RA           |  |
| rs2944542   | chr10:64369999      | 32.6%<br>35.2%<br>38.8%       | 1.17<br>[0.7-1.9]<br>0.5033   | 1.39<br>[0.9-2.2]<br>0.1665   | 1.17<br>[0.9-1.5]<br>0.1771 | intronic       | ZNF365                 |  |
| rs7127307   | chr11:128187383     | 34.6%<br>43.3%<br>44.9%       | 0.70<br>[0.5-1.1]<br>0.1059   | 0.62<br>[0.4-1.0]<br>0.0473   | 0.94<br>[0.8-1.2]<br>0.5563 | intergenic     | LOC101929497;ETS1      |  |
| rs10791824  | chr11:65559266      | 38.7%<br>36.3%<br>41.5%       | 0.87<br>[0.6-1.4]<br>0.5323   | 1.09<br>[0.7-1.8]<br>0.7229   | 1.25<br>[1.0-1.6]<br>0.0599 | intronic       | OVOL1                  |  |
| rs2212434   | chr11:76281593      | 42.8%<br>49.6%<br>42.4%       | 1.39<br>[0.9-2.2]<br>0.1352   | 1.93<br>[1.2-3.1]<br>0.0049   | 1.36<br>[1.1-1.7]<br>0.0078 | intergenic     | EMSY;LRRC32            |  |
| rs2038255   | chr14:35559126      | 17.3%<br>21.3%<br>19.6%       | 0.75<br>[0.4-1.3]<br>0.3214   | 0.82<br>[0.5-1.5]<br>0.5012   | 1.11<br>[0.8-1.5]<br>0.4634 | ncRNA_intronic | LOC101927178           |  |
| rs2041733   | chr16:11229589      | 46.9%<br>49.8%<br>44.7%       | 1.18<br>[0.8-1.8]<br>0.4576   | 0.95<br>[0.6-1.5]<br>0.8334   | 0.81<br>[0.6-1.0]<br>0.0672 | intronic       | CLEC16A                |  |
| rs12951971  | chr17:40528131      | 13.5%<br>11.5%<br>8.05%       | 1.16<br>[0.6-2.2]<br>0.6586   | 1.55<br>[0.8-3.0]<br>0.1952   | 1.49<br>[1.0-2.2]<br>0.0428 | intronic       | STAT3                  |  |
| rs6419573   | chr2:103027103      |                               | excluded from analysis for QC |                               |                             |                |                        |  |
| rs4643526   | chr2:61184651       | 16.3%<br>20.2%<br>16.8%       | 0.78<br>[0.4-1.4]<br>0.3951   | 0.99<br>[0.5-1.8]<br>0.9838   | 1.29<br>[1.0-1.7]<br>0.0955 | intronic       | PUS10                  |  |
| rs112111458 | chr2:71100105       | 11.2%<br>10.9%<br>14.7%       | 1.07<br>[0.6-2.0]<br>0.8301   | 0.73<br>[0.4-1.5]<br>0.3856   | 0.70<br>[0.5-1.0]<br>0.0329 | intergenic     | CD207;LINC01143        |  |
| rs10199605  | chr2:8495097        | 30.6%<br>30.0%<br>29.7%       | 1.00<br>[0.6-1.6]<br>0.9963   | 1.01<br>[0.6-1.6]<br>0.9556   | 1.02<br>[0.8-1.3]<br>0.8925 | intergenic     | LINC00299;LOC101929567 |  |
| rs4809219   | chr20:62303115      | 20.4%<br>21.1%<br>26.1%       | 1.09<br>[0.6-1.8]<br>0.7552   | 1.46<br>[0.8-2.6]<br>0.1833   | 1.33<br>[1.0-1.7]<br>0.0302 | ncRNA_intronic | RTEL1-TNFRSF6B         |  |
| rs1249910   | chr3:112391174      | 39.8%<br>33.2%<br>32.6%       | 0.76<br>[0.5-1.2]<br>0.2214   | 0.73<br>[0.5-1.2]<br>0.1825   | 0.97<br>[0.8-1.2]<br>0.8152 | intergenic     | CCDC80;LOC101929694    |  |

| snp147                     | chr:position (hg19) | MAF<br>(ADEH+<br>ADEH-<br>NA) | ADEH+ vs<br>ADEH-           | ADEH+ vs<br>NA              | ADEH- vs<br>NA              | Func.refGene   | Gene.refGene      |
|----------------------------|---------------------|-------------------------------|-----------------------------|-----------------------------|-----------------------------|----------------|-------------------|
|                            |                     |                               | OR<br>[95% CI]<br>P-value   | OR<br>[95% CI]<br>P-value   | OR<br>[95% CI]<br>P-value   |                |                   |
| rs7625909                  | chr3:53091164       | 35.7%<br>29.1%<br>33.0%       | 1.32<br>[0.8-2.1]<br>0.2314 | 1.12<br>[0.7-1.8]<br>0.6213 | 0.83<br>[0.7-1.1]<br>0.1335 | intergenic     | SFMBT1;RFT1       |
| rs6827756(4:1232<br>43592) | chr4:123184411*     | 38.7%<br>38.4%<br>38.1%       | 1.02<br>[0.7-1.6]<br>0.9176 | 0.99<br>[0.6-1.6]<br>0.9554 | 0.98<br>[0.8-1.2]<br>0.8652 | intronic       | KIAA1109          |
| rs12188917                 | chr5:131991085      | 23.4%<br>24.3%<br>19.4%       | NA                          | 1.35<br>[0.8-2.4]<br>0.2833 | 1.35<br>[1.0-1.8]<br>0.0313 | ncRNA_intronic | TH2LCRR           |
| rs10214237                 | chr5:35883734       | 33.6%<br>24.3%<br>29.8%       | 1.45<br>[0.9-2.3]<br>0.0971 | 1.10<br>[0.7-1.7]<br>0.6830 | 0.77<br>[0.6-1.0]<br>0.0307 | intergenic     | IL7R;CAPSL        |
| rs4713555                  | chr6:32575524       | 19.3%<br>24.7%<br>26.6%       | 0.76<br>[0.5-1.3]<br>0.3097 | 0.66<br>[0.4-1.2]<br>0.1481 | 0.89<br>[0.7-1.2]<br>0.3850 | intergenic     | HLA-DRB1;HLA-DQA1 |
| rs6473227                  | chr8:81285892       | 42.8%<br>40.1%<br>40.4%       | 0.90<br>[0.6-1.4]<br>0.6244 | 0.91<br>[0.6-1.4]<br>0.6778 | 1.01<br>[0.8-1.3]<br>0.9356 | intergenic     | MIR5708;ZBTB10    |
| rs12730935                 | Not in our dataset  |                               |                             |                             |                             |                |                   |
| rs145809981                |                     |                               |                             |                             |                             |                |                   |
| rs2592555                  |                     |                               |                             |                             |                             |                |                   |
| rs2918307                  |                     |                               |                             |                             |                             |                |                   |
| rs4312054                  |                     |                               |                             |                             |                             |                |                   |

\* A nearby SNP (rs6827756; at 123,184,411 bp) in LD ( $r^2 = 0.97$  in the 1000 Genomes Project) showed similar association ( $\log_{10}(\text{Bayes factor}) = 7.21$ , European fixed-effects  $P = 3 \times 10^{-9}$ )

**Table E5:** Clinical characteristics of carriers for variants enriched in recurrent ADEH+ subjects from Table III.

| Gene                                   | Variant<br>dbSNP ID   |                                        | carrier-heterozygous |                        |                    | carrier-homozygous   |                     |                  |             |           |
|----------------------------------------|-----------------------|----------------------------------------|----------------------|------------------------|--------------------|----------------------|---------------------|------------------|-------------|-----------|
|                                        |                       |                                        | ADEH-<br>(n=491)     | ADEH+<br>(n=49)        | NA<br>(n=237)      | ADEH-<br>(n=491)     | ADEH+<br>(n=49)     | NA<br>(n=237)    |             |           |
| SIDT2                                  | rs142171036           | <b>N</b>                               | 2                    | 4                      | 0                  | -                    | -                   | -                |             |           |
|                                        |                       | <b>Males N (%)</b>                     | 1<br>(50%)           | 3<br>(75%)             | -                  | -                    | -                   | -                |             |           |
|                                        |                       | <b>Age* (Yrs) mean (SD)</b>            | 17.5<br>(19.1)       | 31.2<br>(15)           | -                  | -                    | -                   | -                |             |           |
|                                        |                       | <b>Total IgE (kU/L) mean (range)</b>   | 17.8<br>(4.5-31.1)   | 7452<br>(716-23135)    | -                  | -                    | -                   | -                |             |           |
|                                        |                       | <b>Eosinophils mean (range)</b>        | 132<br>(123-141)     | 520<br>(41-1250)       | -                  | -                    | -                   | -                |             |           |
|                                        |                       | <b>Phadiatop (kUA/L) mean (range)</b>  | 0.3<br>(0.3-0.3)     | 123.2<br>(54.6-286)    | -                  | -                    | -                   | -                |             |           |
|                                        |                       | <b>EASI mean (range)</b>               | 2.4<br>(0.3-4.4)     | 14.1<br>(0.7-28.9)     | -                  | -                    | -                   | -                |             |           |
|                                        |                       | <b>Rajka-Langeland score mean (SD)</b> | 5.5<br>(0.7)         | 6.2<br>(2.8)           | -                  | -                    | -                   | -                |             |           |
|                                        |                       | CLEC7A                                 | rs16910526           | <b>N</b>               | 70                 | 14                   | 25                  | 6                | 1           | 1         |
|                                        |                       |                                        |                      | <b>Males N (%)</b>     | 36<br>(51.4%)      | 7<br>(50%)           | 7<br>(28%)          | 3<br>(50%)       | 1<br>(100%) | 0<br>(0%) |
| <b>Age* (Yrs) mean (SD)</b>            | 32.4<br>(19.8)        |                                        |                      | 19.6<br>(17)           | 44.2<br>(14.9)     | 31.2<br>(22.2)       | 13                  | 26.9             |             |           |
| <b>Total IgE (kU/L) mean (range)</b>   | 3992.7<br>(2.5-82020) |                                        |                      | 2886.8<br>(31.7-10412) | 29.1<br>(3.4-89.8) | 2702<br>(10.1-14380) | 995<br>(995-995)    | 8.9<br>(8.9-8.9) |             |           |
| <b>Eosinophils mean (range)</b>        | 329.9<br>(23-1356)    |                                        |                      | 541.4<br>(41-1409)     | 111.6<br>(5-322)   | 400.5<br>(173-588)   | 108<br>(108-108)    | 149<br>(149-149) |             |           |
| <b>Phadiatop (kUA/L) mean (range)</b>  | 138.9<br>(0.1-5632)   |                                        |                      | 119.1<br>(0.2-726)     | 0.2<br>(0.1-0.3)   | 40.6<br>(0.2-88.1)   | 59.5<br>(59.5-59.5) | 0.3<br>(0.3-0.3) |             |           |
| <b>EASI mean (range)</b>               | 15.4<br>(0.4-63.9)    |                                        |                      | 18.6<br>(0.6-55)       | -                  | 13.2<br>(1.9-33.7)   | 23<br>(23-23)       | -                |             |           |
| <b>Rajka-Langeland score mean (SD)</b> | 6.8<br>(1.5)          |                                        |                      | 7.1<br>(1.8)           | -                  | 6.5<br>(2.1)         | 7<br>(NA)           | -                |             |           |

| Gene                                   | Variant<br>dbSNP ID   |                                        | carrier-heterozygous |                       |                  | carrier-homozygous  |                    |                    |           |            |
|----------------------------------------|-----------------------|----------------------------------------|----------------------|-----------------------|------------------|---------------------|--------------------|--------------------|-----------|------------|
|                                        |                       |                                        | ADEH-<br>(n=491)     | ADEH+<br>(n=49)       | NA<br>(n=237)    | ADEH-<br>(n=491)    | ADEH+<br>(n=49)    | NA<br>(n=237)      |           |            |
| CLEC7A                                 | rs140318683           | <b>N</b>                               | 4                    | 1                     | 0                | -                   | -                  | -                  |           |            |
|                                        |                       | <b>Males N (%)</b>                     | 2<br>(50%)           | 1<br>(100%)           | -                | -                   | -                  | -                  |           |            |
|                                        |                       | <b>Age* (Yrs) mean (SD)</b>            | 32.2<br>(23.7)       | 8<br>(NA)             | -                | -                   | -                  | -                  |           |            |
|                                        |                       | <b>Total IgE (kU/L) mean (range)</b>   | 298.2<br>(196-395)   | 65.8<br>(65.8-65.8)   | -                | -                   | -                  | -                  |           |            |
|                                        |                       | <b>Eosinophils mean (range)</b>        | 352.5<br>(223-554)   | 656<br>(656-656)      | -                | -                   | -                  | -                  |           |            |
|                                        |                       | <b>Phadiatop (kUA/L) mean (range)</b>  | 28.9<br>(14.6-55.8)  | 2.2<br>(2.2-2.2)      | -                | -                   | -                  | -                  |           |            |
|                                        |                       | <b>EASI mean (range)</b>               | 11.8<br>(1.4-24.8)   | 14.8<br>(14.8-14.8)   | -                | -                   | -                  | -                  |           |            |
|                                        |                       | <b>Rajka-Langeland score mean (SD)</b> | 6.2<br>(2.1)         | 8<br>(NA)             | -                | -                   | -                  | -                  |           |            |
|                                        |                       | GSTZ1                                  | rs7972               | <b>N</b>              | 71               | 12                  | 25                 | 4                  | 2         | 2          |
|                                        |                       |                                        |                      | <b>Males N (%)</b>    | 32<br>(45.1%)    | 5<br>(41.7%)        | 6<br>(24%)         | 3<br>(75%)         | 0<br>(0%) | 1<br>(50%) |
| <b>Age* (Yrs) mean (SD)</b>            | 24.5<br>(15.8)        |                                        |                      | 22.1<br>(15.9)        | 38.2<br>(13.9)   | 29.2<br>(22)        | 20.5<br>(6.4)      | 48.5<br>(23.3)     |           |            |
| <b>Total IgE (kU/L) mean (range)</b>   | 2215.6<br>(2.6-25887) |                                        |                      | 2302.7<br>(14.5-9914) | 11.1<br>(2-40)   | 1256<br>(17.2-4869) | 65.2<br>(38.4-92)  | 27.4<br>(6.7-48.1) |           |            |
| <b>Eosinophils mean (range)</b>        | 279.2<br>(23-2195)    |                                        |                      | 445<br>(41-1013)      | 117.1<br>(5-391) | 558.5<br>(42-1042)  | 341<br>(207-475)   | 147<br>(50-244)    |           |            |
| <b>Phadiatop (kUA/L) mean (range)</b>  | 101.8<br>(0.1-1416)   |                                        |                      | 180.6<br>(7.3-1013)   | 0.2<br>(0.1-0.3) | 15.8<br>(0.2-49.9)  | 11.6<br>(3.7-19.4) | 0.2<br>(0.1-0.3)   |           |            |
| <b>EASI mean (range)</b>               | 12.8<br>(0.3-55.5)    |                                        |                      | 12.6<br>(0-28.4)      | -                | 11.8<br>(5-21.8)    | 7.9<br>(5.7-10.2)  | -                  |           |            |
| <b>Rajka-Langeland score mean (SD)</b> | 6.9<br>(1.3)          |                                        |                      | 6.8<br>(2.1)          | -                | 7.2<br>(1.3)        | 6<br>(1.4)         | -                  |           |            |

| Gene                                   | Variant<br>dbSNP ID |                                        | carrier-heterozygous |                     |                    | carrier-homozygous |                 |               |   |   |
|----------------------------------------|---------------------|----------------------------------------|----------------------|---------------------|--------------------|--------------------|-----------------|---------------|---|---|
|                                        |                     |                                        | ADEH-<br>(n=491)     | ADEH+<br>(n=49)     | NA<br>(n=237)      | ADEH-<br>(n=491)   | ADEH+<br>(n=49) | NA<br>(n=237) |   |   |
| TPSG1                                  | rs61587627          | <b>N</b>                               | 22                   | 3                   | 2                  | -                  | -               | -             |   |   |
|                                        |                     | <b>Males N (%)</b>                     | 9<br>(40.9%)         | 1<br>(33.3%)        | 0<br>(0%)          | -                  | -               | -             |   |   |
|                                        |                     | <b>Age* (Yrs) mean (SD)</b>            | 28.5<br>(19.9)       | 21.7<br>(19)        | 29<br>(5.7)        | -                  | -               | -             |   |   |
|                                        |                     | <b>Total IgE (kU/L) mean (range)</b>   | 2361.5<br>(2-16421)  | 2406<br>(1911-2936) | 11.2<br>(4.9-17.5) | -                  | -               | -             |   |   |
|                                        |                     | <b>Eosinophils mean (range)</b>        | 279.4<br>(11-1419)   | 481.7<br>(88-948)   | 49.5<br>(16-83)    | -                  | -               | -             |   |   |
|                                        |                     | <b>Phadiatop (kUA/L) mean (range)</b>  | 117.7<br>(0.2-1127)  | 247.4<br>(7.3-689)  | 0.1<br>(0.1-0.1)   | -                  | -               | -             |   |   |
|                                        |                     | <b>EASI mean (range)</b>               | 14.5<br>(1.1-66.8)   | 12.8<br>(3.5-19.6)  | -                  | -                  | -               | -             |   |   |
|                                        |                     | <b>Rajka-Langeland score mean (SD)</b> | 7.2<br>(1.3)         | 6.8<br>(1.9)        | -                  | -                  | -               | -             |   |   |
|                                        |                     | TPSG1                                  | rs187607214          | <b>N</b>            | 3                  | 2                  | 0               | -             | - | - |
|                                        |                     |                                        |                      | <b>Males N (%)</b>  | 1<br>(33.3%)       | 1<br>(50%)         | -               | -             | - | - |
| <b>Age* (Yrs) mean (SD)</b>            | 39<br>(17.8)        |                                        |                      | 46<br>(22.6)        | -                  | -                  | -               | -             |   |   |
| <b>Total IgE (kU/L) mean (range)</b>   | 126.7<br>(3.6-372)  |                                        |                      | 4024<br>(3535-4513) | -                  | -                  | -               | -             |   |   |
| <b>Eosinophils mean (range)</b>        | 173.7<br>(62-352)   |                                        |                      | 454<br>(138-770)    | -                  | -                  | -               | -             |   |   |
| <b>Phadiatop (kUA/L) mean (range)</b>  | 21<br>(0.6-41.4)    |                                        |                      | 263.5<br>(95-432)   | -                  | -                  | -               | -             |   |   |
| <b>EASI mean (range)</b>               | 12.9<br>(0.5-24.2)  |                                        |                      | 10.6<br>(4.9-16.4)  | -                  | -                  | -               | -             |   |   |
| <b>Rajka-Langeland score mean (SD)</b> | 6<br>(2.6)          |                                        |                      | 7<br>(1.4)          | -                  | -                  | -               | -             |   |   |

| Gene                                   | Variant<br>dbSNP ID |                                        | carrier-heterozygous |                     |               | carrier-homozygous |                 |               |   |   |
|----------------------------------------|---------------------|----------------------------------------|----------------------|---------------------|---------------|--------------------|-----------------|---------------|---|---|
|                                        |                     |                                        | ADEH-<br>(n=491)     | ADEH+<br>(n=49)     | NA<br>(n=237) | ADEH-<br>(n=491)   | ADEH+<br>(n=49) | NA<br>(n=237) |   |   |
| SP110                                  | rs372023963         | <b>N</b>                               | 0                    | 1                   | 0             | -                  | -               | -             |   |   |
|                                        |                     | <b>Males N (%)</b>                     | -                    | 0<br>(0%)           | -             | -                  | -               | -             |   |   |
|                                        |                     | <b>Age* (Yrs) mean (SD)</b>            | -                    | 46<br>(NA)          | -             | -                  | -               | -             |   |   |
|                                        |                     | <b>Total IgE (kU/L) mean (range)</b>   | -                    | 14.5<br>(14.5-14.5) | -             | -                  | -               | -             |   |   |
|                                        |                     | <b>Eosinophils mean (range)</b>        | -                    | 196<br>(196-196)    | -             | -                  | -               | -             |   |   |
|                                        |                     | <b>Phadiatop (kUA/L) mean (range)</b>  | -                    | NA<br>(NA)          | -             | -                  | -               | -             |   |   |
|                                        |                     | <b>EASI mean (range)</b>               | -                    | 0<br>(0-0)          | -             | -                  | -               | -             |   |   |
|                                        |                     | <b>Rajka-Langeland score mean (SD)</b> | -                    | 4<br>(NA)           | -             | -                  | -               | -             |   |   |
|                                        |                     | SP110                                  | rs768938186          | <b>N</b>            | 0             | 1                  | 0               | -             | - | - |
|                                        |                     |                                        |                      | <b>Males N (%)</b>  | -             | 0<br>(0%)          | -               | -             | - | - |
| <b>Age* (Yrs) mean (SD)</b>            | -                   |                                        |                      | 4<br>(NA)           | -             | -                  | -               | -             |   |   |
| <b>Total IgE (kU/L) mean (range)</b>   | -                   |                                        |                      | 1477<br>(1477-1477) | -             | -                  | -               | -             |   |   |
| <b>Eosinophils mean (range)</b>        | -                   |                                        |                      | 593<br>(593-593)    | -             | -                  | -               | -             |   |   |
| <b>Phadiatop (kUA/L) mean (range)</b>  | -                   |                                        |                      | 90.3<br>(90.3-90.3) | -             | -                  | -               | -             |   |   |
| <b>EASI mean (range)</b>               | -                   |                                        |                      | 2<br>(2-2)          | -             | -                  | -               | -             |   |   |
| <b>Rajka-Langeland score mean (SD)</b> | -                   |                                        |                      | 4<br>(NA)           | -             | -                  | -               | -             |   |   |

| Gene                                   | Variant<br>dbSNP ID    |                                        | carrier-heterozygous  |                        |                     | carrier-homozygous |                 |               |   |   |
|----------------------------------------|------------------------|----------------------------------------|-----------------------|------------------------|---------------------|--------------------|-----------------|---------------|---|---|
|                                        |                        |                                        | ADEH-<br>(n=491)      | ADEH+<br>(n=49)        | NA<br>(n=237)       | ADEH-<br>(n=491)   | ADEH+<br>(n=49) | NA<br>(n=237) |   |   |
| SP110                                  | rs149485401            | <b>N</b>                               | 6                     | 3                      | 2                   | -                  | -               | -             |   |   |
|                                        |                        | <b>Males N (%)</b>                     | 4<br>(66.7%)          | 2<br>(66.7%)           | 0<br>(0%)           | -                  | -               | -             |   |   |
|                                        |                        | <b>Age* (Yrs) mean (SD)</b>            | 25<br>(12.5)          | 22<br>(19)             | 49.5<br>(9.1)       | -                  | -               | -             |   |   |
|                                        |                        | <b>Total IgE (kU/L) mean (range)</b>   | 2140.2<br>(198-10629) | 9139<br>(1911-23135)   | 20.4<br>(20.4-20.4) | -                  | -               | -             |   |   |
|                                        |                        | <b>Eosinophils mean (range)</b>        | 500.7<br>(221-1288)   | 397.3<br>(88-948)      | 175<br>(74-276)     | -                  | -               | -             |   |   |
|                                        |                        | <b>Phadiatop (kUA/L) mean (range)</b>  | 36<br>(12.3-73.2)     | 35.9<br>(7.3-54.6)     | 0.2<br>(0.1-0.3)    | -                  | -               | -             |   |   |
|                                        |                        | <b>EASI mean (range)</b>               | 13.7<br>(2.2-48.7)    | 19.4<br>(15.2-23.2)    | -                   | -                  | -               | -             |   |   |
|                                        |                        | <b>Rajka-Langeland score mean (SD)</b> | 6.8<br>(1.2)          | 7.7<br>(1.5)           | -                   | -                  | -               | -             |   |   |
|                                        |                        | RBBP8NL                                | rs200738153           | <b>N</b>               | 16                  | 7                  | 4               | -             | - | - |
|                                        |                        |                                        |                       | <b>Males N (%)</b>     | 8<br>(50%)          | 2<br>(28.6%)       | 0<br>(0%)       | -             | - | - |
| <b>Age* (Yrs) mean (SD)</b>            | 26.1<br>(17.9)         |                                        |                       | 19.9<br>(13.6)         | 28.1<br>(4)         | -                  | -               | -             |   |   |
| <b>Total IgE (kU/L) mean (range)</b>   | 3708.6<br>(17.6-15650) |                                        |                       | 4274.6<br>(65.8-23135) | 6.6<br>(5-9.8)      | -                  | -               | -             |   |   |
| <b>Eosinophils mean (range)</b>        | 369.4<br>(23-1095)     |                                        |                       | 391.1<br>(156-656)     | 93.5<br>(13-152)    | -                  | -               | -             |   |   |
| <b>Phadiatop (kUA/L) mean (range)</b>  | 108.2<br>(0.1-578)     |                                        |                       | 44.8<br>(2.2-90.3)     | 0.2<br>(0.1-0.3)    | -                  | -               | -             |   |   |
| <b>EASI mean (range)</b>               | 16.5<br>(0.6-52.9)     |                                        |                       | 13.4<br>(2-23.7)       | -                   | -                  | -               | -             |   |   |
| <b>Rajka-Langeland score mean (SD)</b> | 6.9<br>(1.9)           |                                        |                       | 6.9<br>(1.7)           | -                   | -                  | -               | -             |   |   |

| Gene                                   | Variant<br>dbSNP ID   |                                        | carrier-heterozygous  |                      |                   | carrier-homozygous  |                 |               |   |   |
|----------------------------------------|-----------------------|----------------------------------------|-----------------------|----------------------|-------------------|---------------------|-----------------|---------------|---|---|
|                                        |                       |                                        | ADEH-<br>(n=491)      | ADEH+<br>(n=49)      | NA<br>(n=237)     | ADEH-<br>(n=491)    | ADEH+<br>(n=49) | NA<br>(n=237) |   |   |
| TRIM15                                 | rs34823152            | <b>N</b>                               | 33                    | 13                   | 26                | 1                   | 0               | 0             |   |   |
|                                        |                       | <b>Males N (%)</b>                     | 11<br>(33.3%)         | 6<br>(46.2%)         | 7<br>(26.9%)      | 1<br>(100%)         | -               | -             |   |   |
|                                        |                       | <b>Age* (Yrs) mean (SD)</b>            | 27.9<br>(17.4)        | 21.3<br>(14.1)       | 38.1<br>(16.8)    | 54<br>(NA)          | -               | -             |   |   |
|                                        |                       | <b>Total IgE (kU/L) mean (range)</b>   | 1548.1<br>(5.5-12027) | 3540<br>(14.5-23102) | 18.4<br>(2-48.1)  | 4.4<br>(4.4-4.4)    | -               | -             |   |   |
|                                        |                       | <b>Eosinophils mean (range)</b>        | 339.7<br>(32-1396)    | 373.4<br>(108-1013)  | 95.7<br>(9-391)   | 42<br>(42-42)       | -               | -             |   |   |
|                                        |                       | <b>Phadiatop (kUA/L) mean (range)</b>  | 63.2<br>(0.2-692)     | 540<br>(0.4-4181)    | 0.3<br>(0.1-0.3)  | NA                  | -               | -             |   |   |
|                                        |                       | <b>EASI mean (range)</b>               | 12.5<br>(0.4-58.5)    | 14.5<br>(0-37.2)     | -                 | 15.8<br>(15.8-15.8) | -               | -             |   |   |
|                                        |                       | <b>Rajka-Langeland score mean (SD)</b> | 6.8<br>(1.3)          | 6.9<br>(2)           | -                 | 8<br>(NA)           | -               | -             |   |   |
|                                        |                       | FRMD3                                  | rs4877747             | <b>N</b>             | 22                | 8                   | 7               | 1             | 0 | 0 |
|                                        |                       |                                        |                       | <b>Males N (%)</b>   | 14<br>(63.6%)     | 4<br>(50%)          | 2<br>(28.6%)    | 1<br>(100%)   | - | - |
| <b>Age* (Yrs) mean (SD)</b>            | 32.4<br>(17.3)        |                                        |                       | 20.9<br>(19.6)       | 35.4<br>(13.1)    | 15<br>(NA)          | -               | -             |   |   |
| <b>Total IgE (kU/L) mean (range)</b>   | 2488.5<br>(5.6-36013) |                                        |                       | 570.6<br>(14.4-1592) | 9.9<br>(2.7-21.1) | 551<br>(551-551)    | -               | -             |   |   |
| <b>Eosinophils mean (range)</b>        | 304.9<br>(63-782)     |                                        |                       | 299.4<br>(22-785)    | 75<br>(32-112)    | 255<br>(255-255)    | -               | -             |   |   |
| <b>Phadiatop (kUA/L) mean (range)</b>  | 85.6<br>(0.1-998)     |                                        |                       | 45.3<br>(0.4-97.3)   | 0.2<br>(0.1-0.3)  | 22.9<br>(22.9-22.9) | -               | -             |   |   |
| <b>EASI mean (range)</b>               | 12.4<br>(1.6-44.9)    |                                        |                       | 5.7<br>(0-23.7)      | -                 | 4.4<br>(4.4-4.4)    | -               | -             |   |   |
| <b>Rajka-Langeland score mean (SD)</b> | 6.7<br>(1.8)          |                                        |                       | 6<br>(1.5)           | -                 | 6<br>(NA)           | -               | -             |   |   |
